# Supplementary material
Source: Research Square preprint supplement (doi:10.21203/rs.3.rs-9646471/v1)
Supplement: Supplementary file 1 [file 2d5a5ada34c8a9de53fc563f.pdf]

## Supplementary Files

### Contents

|                                                                                                                                             |    |
|---------------------------------------------------------------------------------------------------------------------------------------------|----|
| Table S1. Participant numbers by country .....                                                                                              | 11 |
| Table S2. Global Cantril Ladder (2006-2024) – participant numbers, means, and standard deviations.....                                      | 16 |
| Tables S3a-k. Regional Cantril Ladder (2006, 2015, and 2024) – participant numbers, means, and standard deviations.....                     | 18 |
| Table S3a. EU Cantril Ladder (2006, 2015, and 2024) – participant numbers, means, and standard deviations.....                              | 18 |
| Table S3b. Europe Other Cantril Ladder (2006, 2015, and 2024) – participant numbers, means, and standard deviations.....                    | 19 |
| Table S3c. Independent States Cantril Ladder (2006, 2015, and 2024) – participant numbers, means, and standard deviations.....              | 19 |
| Table S3d. Australia / New Zealand Cantril Ladder (2006, 2015, and 2024) – participant numbers, means, and standard deviations ...          | 20 |
| Table S3e. South East Asia Cantril Ladder (2006, 2015, and 2024) – participant numbers, means, and standard deviations .....                | 21 |
| Table S3f. South Asia Cantril Ladder (2006, 2015, and 2024) – participant numbers, means, and standard deviations .....                     | 21 |
| Table S3g. East Asia Cantril Ladder (2006, 2015, and 2024) – participant numbers, means, and standard deviations .....                      | 22 |
| Table S3h. Latin America Cantril Ladder (2006, 2015, and 2024) – participant numbers, means, and standard deviations.....                   | 23 |
| Table S3i. North America Cantril Ladder (2006, 2015, and 2024) – participant numbers, means, and standard deviations.....                   | 23 |
| Table S3j. Middle East and North Africa Cantril Ladder (2006, 2015, and 2024) – participant numbers, means, and standard deviations .....   | 24 |
| Table S3k. Sub-Saharan Africa Cantril Ladder (2006, 2015, and 2024) – participant numbers, means, and standard deviations.....              | 25 |
| Table S4. Global Positive Experiences Index (2006-2024) -- participant numbers, means, and standard deviations.....                         | 26 |
| Table S5a-k. Regional Positive Experiences Index (2006-2024) -- participant numbers, means, and standard deviations .....                   | 27 |
| Table S5a. EU Positive Experiences Index (2006, 2015, and 2024) – participant numbers, means, and standard deviations.....                  | 27 |
| Table S5b. Europe Other Positive Experiences Index (2006, 2015, and 2024) – participant numbers, means, and standard deviations             | 28 |
| Table S5c. Independent States Positive Experiences Index (2006, 2015, and 2024) – participant numbers, means, and standard deviations ..... | 29 |

|                                                                                                                                                       |    |
|-------------------------------------------------------------------------------------------------------------------------------------------------------|----|
| Table S5d. Australia/New Zealand Positive Experiences Index (2006, 2015, and 2024) – participant numbers, means, and standard deviations .....        | 30 |
| Table S5e. South East Asia Positive Experiences Index (2006, 2015, and 2024) – participant numbers, means, and standard deviations .....              | 30 |
| Table S5f. South Asia Positive Experiences Index (2006, 2015, and 2024) – participant numbers, means, and standard deviations.....                    | 31 |
| Table S5g. East Asia Positive Experiences Index (2006, 2015, and 2024) – participant numbers, means, and standard deviations .....                    | 32 |
| Table S5h. Latin America Positive Experiences Index (2006, 2015, and 2024) – participant numbers, means, and standard deviations .....                | 32 |
| Table S5i. North America Positive Experiences Index (2006, 2015, and 2024) – participant numbers, means, and standard deviations .....                | 33 |
| Table S5j. Middle East and North Africa Positive Experiences Index (2006, 2015, and 2024) – participant numbers, means, and standard deviations ..... | 34 |
| Table S5k. Sub-Saharan Africa Positive Experiences Index (2006, 2015, and 2024) – participant numbers, means, and standard deviations .....           | 35 |
| Figures S1-11. Change in regional Cantril means from 2006, 2015, and 2024.....                                                                        | 36 |
| Figures S1a-c. EU Cantril means in 2006, 2015, and 2024.....                                                                                          | 36 |
| Figures S2a-c. Europe other Cantril means in 2006, 2015, and 2024.....                                                                                | 37 |
| Figures S3a-c. Independent states Cantril means in 2006, 2015, and 2024.....                                                                          | 38 |
| Figures S4a-c. Australia and New Zealand Cantril means in 2006, 2015, and 2024 .....                                                                  | 39 |
| Figures S5a-c. South East Asia Cantril means in 2006, 2015, and 2024 .....                                                                            | 40 |
| Figures S6a-c. South Asia Cantril means in 2006, 2015, and 2024 .....                                                                                 | 41 |
| Figures S7a-c. East Asia Cantril means in 2006, 2015, and 2024 .....                                                                                  | 42 |
| Figures S8a-c. Latin America Cantril means in 2006, 2015, and 2024 .....                                                                              | 43 |
| Figures S9a-c. North America Cantril means in 2006, 2015, and 2024.....                                                                               | 44 |
| Figures S10a-c. Middle East and North Africa Cantril means in 2006, 2015, and 2024 .....                                                              | 45 |

|                                                                                                 |    |
|-------------------------------------------------------------------------------------------------|----|
| Figures S11a-c. Sub-Saharan Africa Cantril means in 2006, 2015, and 2024 .....                  | 46 |
| Figures S12-22. Regional Cantril means in 2006, 2015, and 2024 .....                            | 47 |
| Figures S12a-c. EU Cantril means in 2006, 2015, and 2024 .....                                  | 47 |
| Figures S13a-c. Europe Other Cantril means in 2006, 2015, and 2024 .....                        | 48 |
| Figures S14a-c. Independent States Cantril means in 2006, 2015, and 2024.....                   | 49 |
| Figures S15a-c. Oz/NZ Cantril means in 2006, 2015, and 2024.....                                | 50 |
| Figures S16a-c. South East Asia Cantril means in 2006, 2015, and 2024.....                      | 51 |
| Figures S17a-c. South Asia Cantril means in 2006, 2015, and 2024.....                           | 52 |
| Figures S19a-c. Latin America Cantril means in 2006, 2015, and 2024.....                        | 54 |
| Figures S20a-c. North America Cantril means in 2006, 2015, and 2024 .....                       | 55 |
| Figures S21a-c. Middle East and North Africa Cantril means in 2006, 2015, and 2024 .....        | 56 |
| Figures S22a-c. Sub-Saharan Africa Cantril means in 2006, 2015, and 2024.....                   | 57 |
| Figures S23-33. Change in regional Positive Experience means from 2006, 2015, 2024.....         | 58 |
| Figures S23a-c. EU Positive Experience means in 2006, 2015, 2024.....                           | 58 |
| Figures S24a-c. Europe other Positive Experience means in 2006, 2015, 2024.....                 | 59 |
| Figures S25a-c. Independent states Positive Experience means in 2006, 2015, 2024 .....          | 60 |
| Figures S26a-c. Australia and New Zealand Positive Experience means in 2006, 2015, 2024.....    | 61 |
| Figures S27a-c. South East Asia Positive Experience means in 2006, 2015, 2024 .....             | 62 |
| Figures S28a-c. South Asia Positive Experience means in 2006, 2015, 2024 .....                  | 63 |
| Figures S29a-c. East Asia Positive Experience means in 2006, 2015, 2024 .....                   | 64 |
| Figures S30a-c. Latin America Positive Experience means in 2006, 2015, 2024.....                | 65 |
| Figures S31a-c. North America Positive Experience means in 2006, 2015, 2024.....                | 66 |
| Figures S32a-c. Middle East and North Africa Positive Experience means in 2006, 2015, 2024..... | 67 |
| Figures S33a-c. Sub-Saharan Africa Positive Experience means in 2006, 2015, 2024.....           | 68 |

|                                                                                                  |    |
|--------------------------------------------------------------------------------------------------|----|
| Figures S34-44. Regional Positive Experience means in 2006, 2015, and 2024 .....                 | 69 |
| Figures S34a-c. EU Positive Experience means in 2006, 2015, and 2024 .....                       | 69 |
| Figures S35a-c. Europe Other Positive Experience means in 2006, 2015, and 2024 .....             | 70 |
| Figures S36a-c. Independent States Positive Experience means in 2006, 2015, and 2024 .....       | 71 |
| Figures S37a-c. Australia and New Zealand Positive Experience means in 2006, 2015, 2024 .....    | 72 |
| Figures S38a-c. South East Asia Positive Experience means in 2006, 2015, 2024 .....              | 73 |
| Figures S39a-c. East Asia Positive Experience means in 2006, 2015, and 2024 .....                | 74 |
| Figures S40a-c. South Asia Positive Experience means in 2006, 2015, and 2024 .....               | 75 |
| Figures S41a-c. Latin America Positive Experience means in 2006, 2015, and 2024 .....            | 76 |
| Figures S42a-c. North America Positive Experience means in 2006, 2015, and 2024 .....            | 77 |
| Figures S43a-c. Middle East and North Africa Positive Experience means in 2006, 2015, 2024 ..... | 78 |
| Figures S44a-c. Sub-Saharan Africa Positive Experience means in 2006, 2015, 2024 .....           | 79 |
| Tables S6a-fa .....                                                                              | 80 |
| Table S6a. Afghanistan Cantril U-shape ratings, 2006-2024 .....                                  | 80 |
| Table S6b. Albania Cantril U-shape ratings, 2006-2024 .....                                      | 80 |
| Table S6c. Algeria Cantril U-shape ratings, 2006-2024 .....                                      | 81 |
| Table S6d. Argentina Cantril U-shape ratings, 2006-2024 .....                                    | 82 |
| Table S6e. Armenia Cantril U-shape ratings, 2006-2024 .....                                      | 83 |
| Table S6f. Australia Cantril U-shape ratings, 2006-2024 .....                                    | 84 |
| Table S6g. Austria Cantril U-shape ratings, 2006-2024 .....                                      | 84 |
| Table S6h. Azerbaijan Cantril U-shape ratings, 2006-2024 .....                                   | 85 |
| Table S6i. Bangladesh Cantril U-shape ratings, 2006-2024 .....                                   | 86 |
| Table S6j. Belarus Cantril U-shape ratings, 2006-2024 .....                                      | 87 |
| Table S6k. Belgium Cantril U-shape ratings, 2006-2024 .....                                      | 88 |

|                                                                        |     |
|------------------------------------------------------------------------|-----|
| Table S6l. Belize Cantril U-shape ratings, 2006-2024.....              | 88  |
| Table S6m. Benin Cantril U-shape ratings, 2006-2024.....               | 89  |
| Table S6n. Bhutan Cantril U-shape ratings, 2006-2024 .....             | 90  |
| Table S6o. Bolivia Cantril U-shape ratings, 2006-2024 .....            | 91  |
| Table S6p. Bosnia Herzegovina Cantril U-shape ratings, 2006-2024 ..... | 92  |
| Table S6q. Botswana Cantril U-shape ratings, 2006-2024.....            | 92  |
| Table S6r. Brazil Cantril U-shape ratings, 2006-2024.....              | 93  |
| Table S6s. Bulgaria Cantril U-shape ratings, 2006-2024 .....           | 94  |
| Table S6t. Burkina Faso Cantril U-shape ratings, 2006-2024 .....       | 95  |
| Table S6u. Burundi Cantril U-shape ratings, 2006-2024 .....            | 96  |
| Table S6v. Cambodia Cantril U-shape ratings, 2006-2024.....            | 96  |
| Table S6w. Cameroon Cantril U-shape ratings, 2006-2024 .....           | 97  |
| Table S6x. Canada Cantril U-shape ratings, 2006-2024 .....             | 98  |
| Table S6y. Chad Cantril U-shape ratings, 2006-2024.....                | 99  |
| Table S6z. Chile Cantril U-shape ratings, 2006-2024 .....              | 100 |
| Table S6aa. China Cantril U-shape ratings, 2006-2024 .....             | 100 |
| Table S6ab. Colombia Cantril U-shape ratings, 2006-2024 .....          | 101 |
| Table S6ac. Comoros Cantril U-shape ratings, 2006-2024 .....           | 102 |
| Table S6ad. Congo Brazzaville Cantril U-shape ratings, 2006-2024 ..... | 103 |
| Table S6ae. Costa Rica Cantril U-shape ratings, 2006-2024 .....        | 104 |
| Table S6af. Croatia Cantril U-shape ratings, 2006-2024 .....           | 104 |
| Table S6ag. Cyprus Cantril U-shape ratings, 2006-2024.....             | 105 |
| Table S6ah. Czech Republic Cantril U-shape ratings, 2006-2024.....     | 106 |
| Table S6ai. Denmark Cantril U-shape ratings, 2006-2024 .....           | 107 |

|                                                                        |     |
|------------------------------------------------------------------------|-----|
| Table S6aj. Djibouti Cantril U-shape ratings, 2006-2024.....           | 108 |
| Table S6ak. Dominican Republic Cantril U-shape ratings, 2006-2024..... | 108 |
| Table S6al. Ecuador Cantril U-shape ratings, 2006-2024.....            | 109 |
| Table S6am. Egypt Cantril U-shape ratings, 2006-2024.....              | 110 |
| Table S6an. El Salvador Cantril U-shape ratings, 2006-2024.....        | 111 |
| Table S6ao. Estonia Cantril U-shape ratings, 2006-2024.....            | 112 |
| Table S6ap. Eswatini Cantril U-shape ratings, 2006-2024.....           | 112 |
| Table S6aq. Ethiopia Cantril U-shape ratings, 2006-2024.....           | 113 |
| Table S6ar. Finland Cantril U-shape ratings, 2006-2024.....            | 114 |
| Table S6as. France Cantril U-shape ratings, 2006-2024.....             | 115 |
| Table S6at. Gabon Cantril U-shape ratings, 2006-2024.....              | 116 |
| Table S6au. Gambia Cantril U-shape ratings, 2006-2024.....             | 116 |
| Table S6av. Georgia Cantril U-shape ratings, 2006-2024.....            | 117 |
| Table S6aw. Germany Cantril U-shape ratings, 2006-2024.....            | 118 |
| Table S6ax. Ghana Cantril U-shape ratings, 2006-2024.....              | 119 |
| Table S6ay. Greece Cantril U-shape ratings, 2006-2024.....             | 120 |
| Table S6az. Guatemala Cantril U-shape ratings, 2006-2024.....          | 120 |
| Table S6ba. Guinea Cantril U-shape ratings, 2006-2024.....             | 121 |
| Table S6bb. Haiti Cantril U-shape ratings, 2006-2024.....              | 122 |
| Table S6bc. Honduras Cantril U-shape ratings, 2006-2024.....           | 123 |
| Table S6bd. Hong Kong Cantril U-shape ratings, 2006-2024.....          | 124 |
| Table S6be. Hungary Cantril U-shape ratings, 2006-2024.....            | 124 |
| Table S6bf. Iceland Cantril U-shape ratings, 2006-2024.....            | 125 |
| Table S6bg. India Cantril U-shape ratings, 2006-2024.....              | 126 |

|                                                                  |     |
|------------------------------------------------------------------|-----|
| Table S6bh. Indonesia Cantril U-shape ratings, 2006-2024 .....   | 127 |
| Table S6bi. Iran Cantril U-shape ratings, 2006-2024 .....        | 128 |
| Table S6bj. Ireland Cantril U-shape ratings, 2006-2024 .....     | 128 |
| Table S6bk. Israel Cantril U-shape ratings, 2006-2024 .....      | 129 |
| Table S6bl. Italy Cantril U-shape ratings, 2006-2024 .....       | 130 |
| Table S6bm. Ivory Coast Cantril U-shape ratings, 2006-2024 ..... | 131 |
| Table S6bn. Jamaica Cantril U-shape ratings, 2006-2024.....      | 132 |
| Table S6bo. Japan Cantril U-shape ratings, 2006-2024 .....       | 132 |
| Table S6bp. Jordan Cantril U-shape ratings, 2006-2024.....       | 133 |
| Table S6bq. Kazakhstan Cantril U-shape ratings, 2006-2024.....   | 134 |
| Table S6br. Kenya Cantril U-shape ratings, 2006-2024 .....       | 135 |
| Table S6bs. Kosovo Cantril U-shape ratings, 2006-2024.....       | 136 |
| Table S6bt. Kyrgyzstan Cantril U-shape ratings, 2006-2024 .....  | 136 |
| Table S6bu. Laos Cantril U-shape ratings, 2006-2024.....         | 137 |
| Table S6bv. Latvia Cantril U-shape ratings, 2006-2024 .....      | 138 |
| Table S6bw. Lebanon Cantril U-shape ratings, 2006-2024.....      | 139 |
| Table S6bx. Lesotho Cantril U-shape ratings, 2006-2024 .....     | 140 |
| Table S6by. Liberia Cantril U-shape ratings, 2006-2024 .....     | 140 |
| Table S6bz. Lithuania Cantril U-shape ratings, 2006-2024 .....   | 141 |
| Table S6ca. Luxembourg Cantril U-shape ratings, 2006-2024 .....  | 142 |
| Table S6cb. Madagascar Cantril U-shape ratings, 2006-2024.....   | 143 |
| Table S6cc. Malawi Cantril U-shape ratings, 2006-2024.....       | 144 |
| Table S6cd. Malaysia Cantril U-shape ratings, 2006-2024 .....    | 144 |
| Table S6ce. Maldives Cantril U-shape ratings, 2006-2024.....     | 145 |

|                                                                       |     |
|-----------------------------------------------------------------------|-----|
| Table S6cf. Mali Cantril U-shape ratings, 2006-2024 .....             | 146 |
| Table S6cg. Malta Cantril U-shape ratings, 2006-2024.....             | 147 |
| Table S6ch. Mauritania Cantril U-shape ratings, 2006-2024.....        | 148 |
| Table S6ci. Mauritius Cantril U-shape ratings, 2006-2024 .....        | 148 |
| Table S6cj. Mexico Cantril U-shape ratings, 2006-2024.....            | 149 |
| Table S6ck. Moldova Cantril U-shape ratings, 2006-2024 .....          | 150 |
| Table S6cl. Mongolia Cantril U-shape ratings, 2006-2024 .....         | 151 |
| Table S6cm. Montenegro Cantril U-shape ratings, 2006-2024.....        | 152 |
| Table S6cn. Morocco Cantril U-shape ratings, 2006-2024 .....          | 152 |
| Table S6co. Myanmar Cantril U-shape ratings, 2006-2024 .....          | 153 |
| Table S6cp. Nagorno Karabakh Cantril U-shape ratings, 2006-2024 ..... | 154 |
| Table S6cq. Namibia Cantril U-shape ratings, 2006-2024.....           | 155 |
| Table S6cr. Nepal Cantril U-shape ratings, 2006-2024.....             | 156 |
| Table S6cs. Netherlands Cantril U-shape ratings, 2006-2024 .....      | 156 |
| Table S6ct. New Zealand Cantril U-shape ratings, 2006-2024 .....      | 157 |
| Table S6cu. Nicaragua Cantril U-shape ratings, 2006-2024 .....        | 158 |
| Table S6cv. Niger Cantril U-shape ratings, 2006-2024.....             | 159 |
| Table S6cw. Nigeria Cantril U-shape ratings, 2006-2024.....           | 160 |
| Table S6cx. North Macedonia Cantril U-shape ratings, 2006-2024.....   | 160 |
| Table S6cy. Northern Cyprus Cantril U-shape ratings, 2006-2024.....   | 161 |
| Table S6cz. Norway Cantril U-shape ratings, 2006-2024 .....           | 162 |
| Table S6da. Pakistan Cantril U-shape ratings, 2006-2024 .....         | 163 |
| Table S6db. Palestine Cantril U-shape ratings, 2006-2024.....         | 163 |
| Table S6de. Panama Cantril U-shape ratings, 2006-2024 .....           | 164 |

|                                                                  |     |
|------------------------------------------------------------------|-----|
| Table S6df. Paraguay Cantril U-shape ratings, 2006-2024 .....    | 165 |
| Table S6dg. Peru Cantril U-shape ratings, 2006-2024 .....        | 166 |
| Table S6dh. Philippines Cantril U-shape ratings, 2006-2024 ..... | 167 |
| Table S6di. Poland Cantril U-shape ratings, 2006-2024.....       | 167 |
| Table S6j. Portugal Cantril U-shape ratings, 2006-2024 .....     | 168 |
| Table S6dk. Puerto Rico Cantril U-shape ratings, 2006-2024.....  | 169 |
| Table S6dl. Romania Cantril U-shape ratings, 2006-2024.....      | 170 |
| Table S6dm. Russia Cantril U-shape ratings, 2006-2024.....       | 170 |
| Table S6dn. Rwanda Cantril U-shape ratings, 2006-2024.....       | 171 |
| Table S6do. Senegal Cantril U-shape ratings, 2006-2024.....      | 172 |
| Table S6dp. Serbia Cantril U-shape ratings, 2006-2024 .....      | 173 |
| Table S6dq. Sierra Leone Cantril U-shape ratings, 2006-2024..... | 174 |
| Table S6dr. Singapore Cantril U-shape ratings, 2006-2024 .....   | 174 |
| Table S6ds. Slovakia Cantril U-shape ratings, 2006-2024.....     | 175 |
| Table S6dt. Slovenia Cantril U-shape ratings, 2006-2024 .....    | 176 |
| Table S6du. Somaliland Cantril U-shape ratings, 2006-2024.....   | 177 |
| Table S6dv. South Africa Cantril U-shape ratings, 2006-2024..... | 177 |
| Table S6dw. South Korea Cantril U-shape ratings, 2006-2024 ..... | 178 |
| Table S6dx. South Sudan Cantril U-shape ratings, 2006-2024 ..... | 179 |
| Table S6dy. Spain Cantril U-shape ratings, 2006-2024 .....       | 180 |
| Table S6ez. Sri Lanka Cantril U-shape ratings, 2006-2024 .....   | 181 |
| Table S6ea. Sudan Cantril U-shape ratings, 2006-2024 .....       | 181 |
| Table S6eb. Sweden Cantril U-shape ratings, 2006-2024.....       | 182 |
| Table S6ec. Switzerland Cantril U-shape ratings, 2006-2024.....  | 183 |

|                                                                                            |     |
|--------------------------------------------------------------------------------------------|-----|
| Table S6ed. Syria Cantril U-shape ratings, 2006-2024 .....                                 | 184 |
| Table S6ee. Taiwan Cantril U-shape ratings, 2006-2024.....                                 | 185 |
| Table S6ef. Tajikistan Cantril U-shape ratings, 2006-2024.....                             | 185 |
| Table S6eg. Tanzania Cantril U-shape ratings, 2006-2024 .....                              | 186 |
| Table S6eh. Thailand Cantril U-shape ratings, 2006-2024.....                               | 187 |
| Table S6ei. Togo Cantril U-shape ratings, 2006-2024.....                                   | 188 |
| Table S6ej. Trinidad and Tobago Cantril U-shape ratings, 2006-2024 .....                   | 189 |
| Table S6ek. Tunisia Cantril U-shape ratings, 2006-2024.....                                | 189 |
| Table S6el. Turkey Cantril U-shape ratings, 2006-2024 .....                                | 190 |
| Table S6em. Turkmenistan Cantril U-shape ratings, 2006-2024 .....                          | 191 |
| Table S6en. Uganda Cantril U-shape ratings, 2006-2024 .....                                | 192 |
| Table S6eo. Ukraine Cantril U-shape ratings, 2006-2024.....                                | 193 |
| Table S6ep. United Kingdom Cantril U-shape ratings, 2006-2024 .....                        | 193 |
| Table S6eq. United States Cantril U-shape ratings, 2006-2024.....                          | 194 |
| Table S6er. Uruguay Cantril U-shape ratings, 2006-2024.....                                | 195 |
| Table S6es. Uzbekistan Cantril U-shape ratings, 2006-2024.....                             | 196 |
| Table S6et. Venezuela Cantril U-shape ratings, 2006-2024.....                              | 197 |
| Table S6eu. Vietnam Cantril U-shape ratings, 2006-2024.....                                | 197 |
| Table S6ev. Yemen Cantril U-shape ratings, 2006-2024 .....                                 | 198 |
| Table S6ew. Zambia Cantril U-shape ratings, 2006-2024 .....                                | 199 |
| Table S6ex. Zimbabwe Cantril U-shape ratings, 2006-2024.....                               | 200 |
| Table S6ey. Year Summary Cantril U-shape ratings, 2006-2024.....                           | 201 |
| Table S6ez. Country Summary Cantril U-shape ratings, 2006-2024 (Afghanistan—Burundi) ..... | 201 |
| Table S6ez. Country Summary Cantril U-shape ratings, 2006-2024 (Cambodia—Egypt) .....      | 202 |

|                                                                                               |     |
|-----------------------------------------------------------------------------------------------|-----|
| Table S6ez. Country Summary Cantril U-shape ratings, 2006-2024 (El Salvador—India) .....      | 203 |
| Table S6ez. Country Summary Cantril U-shape ratings, 2006-2024 (Indonesia—Lithuania) .....    | 204 |
| Table S6ez. Country Summary Cantril U-shape ratings, 2006-2024 (Luxembourg—New Zealand) ..... | 205 |
| Table S6ez. Country Summary Cantril U-shape ratings, 2006-2024 (Nicaragua—Saudi Arabia) ..... | 205 |
| Table S6ez. Country Summary Cantril U-shape ratings, 2006-2024 (Senegal—Tanzania) .....       | 206 |
| Table S6ez. Country Summary Cantril U-shape ratings, 2006-2024 .....                          | 207 |
| Table S6fa. Country Overview .....                                                            | 208 |

**Table S1. Participant numbers by country**

| Country                | 2006 | 2007 | 2008 | 2009 | 2010 | 2011 | 2012 | 2013 | 2014 | 2015 | 2016 | 2017 | 2018 | 2019 | 2020 | 2021 | 2022 | 2023 | 2024 | Total |
|------------------------|------|------|------|------|------|------|------|------|------|------|------|------|------|------|------|------|------|------|------|-------|
| Afghanistan            |      |      | 1010 | 2000 | 1000 | 1000 | 2000 | 1000 | 1000 | 1000 | 1000 | 1000 | 1000 | 1127 |      | 1000 | 1000 | 1000 |      | 17137 |
| Albania                | 981  |      | 1020 | 1000 | 1000 | 1006 | 1029 | 1035 | 999  | 1000 | 1000 | 1000 | 1000 | 1080 | 1000 | 1000 | 1001 | 1000 | 1000 | 18151 |
| Algeria                |      |      |      |      | 1000 | 2001 | 2027 |      | 1002 |      | 1001 | 1016 | 1000 | 1100 | 1016 | 1005 | 821  |      | 1003 | 13992 |
| Angola                 |      |      |      |      |      | 1000 | 1000 | 1000 | 1000 |      |      |      |      |      |      |      |      |      |      | 4000  |
| Argentina              | 1000 | 1000 | 1000 | 1000 | 1000 | 1000 | 1000 | 1000 | 1000 | 1000 | 1000 | 1000 | 1000 | 1060 | 1000 | 1002 | 1005 | 1007 | 1000 | 19074 |
| Armenia                | 1000 | 1000 | 1000 | 1000 | 1000 | 1000 | 1000 | 1000 | 1000 | 1000 | 1000 | 1000 | 1000 | 1080 |      | 1000 | 1003 | 1000 | 1000 | 18083 |
| Australia              | 1001 | 1205 | 1005 |      | 1000 | 1010 | 1002 | 1002 | 2002 | 1001 | 1004 | 1003 | 1001 | 1047 | 1003 | 1000 | 1000 | 1002 | 1000 | 19288 |
| Austria                | 1004 |      | 1000 | 1000 | 1000 | 1004 | 1001 | 1000 | 2000 | 1000 | 1000 | 1000 | 1000 | 1025 | 1000 | 1000 | 1000 | 1000 | 1000 | 19034 |
| Azerbaijan             | 1000 | 1000 | 1000 | 1000 | 1000 | 1000 | 1000 | 1000 | 1000 | 1000 | 1000 | 1000 | 1000 | 1080 |      |      | 1028 | 1000 | 1000 | 17108 |
| Bahrain                |      |      |      | 2128 | 2062 | 2010 | 1000 | 1002 | 2009 | 1000 | 1010 | 1064 |      | 1060 | 1009 |      |      | 1009 | 1015 | 17378 |
| Bangladesh             | 1048 | 1200 | 1000 | 1000 | 1000 | 1000 | 3000 | 1000 | 1000 | 1000 | 1000 | 1000 | 1000 | 3072 | 1013 | 1000 | 1000 | 1000 | 1000 | 23333 |
| Belarus                | 1092 | 1114 | 1091 | 1077 | 1013 | 1007 | 1052 | 1032 | 1036 | 1034 | 1039 | 1053 | 1061 | 1128 |      |      |      |      |      | 13777 |
| Belgium                | 1003 | 1022 | 1002 |      | 1003 | 1002 | 1001 | 1006 | 2004 | 1037 | 1000 | 1001 | 1011 | 1025 | 1005 | 1010 | 1000 | 1000 | 1002 | 19134 |
| Belize                 |      | 502  |      |      |      |      |      |      | 504  |      |      |      |      |      |      |      |      |      |      | 1006  |
| Benin                  | 1000 |      |      |      |      | 1000 | 1000 | 1000 | 1000 | 1000 | 1000 | 1000 | 1000 | 1000 | 1042 | 1000 | 1000 | 1000 | 1000 | 15042 |
| Bhutan                 |      |      |      |      |      |      |      | 1000 | 1020 | 1020 |      |      |      |      |      |      |      |      |      | 3040  |
| Bolivia                | 1000 | 1000 |      | 1000 | 1000 | 1000 | 1000 | 1000 | 1000 | 1000 | 1000 | 1000 | 1000 | 1000 | 1001 | 1004 | 1000 | 1000 | 1000 | 18005 |
| Bosnia and Herzegovina | 2002 |      | 1009 | 1023 | 1000 | 1009 | 1005 | 1010 | 1001 | 1000 | 1000 | 1000 | 1000 | 1080 | 1001 | 1000 | 1000 | 1000 | 1000 | 19140 |

|                    |      |      |      |      |      |      |      |      |      |      |      |      |      |      |      |      |      |      |      |       |
|--------------------|------|------|------|------|------|------|------|------|------|------|------|------|------|------|------|------|------|------|------|-------|
| Botswana           | 1000 |      | 1000 |      | 1000 | 1000 | 1000 | 1000 | 1000 | 1000 | 1000 | 1000 | 1002 | 1114 |      |      | 1003 | 1005 | 1000 | 15124 |
| Brazil             | 1029 | 1038 | 1032 | 1031 | 1043 | 1042 | 2005 | 1003 | 1007 | 1004 | 1001 | 1000 | 1000 | 3001 | 1002 | 1005 | 1000 | 1000 | 1000 | 22243 |
| Bulgaria           |      |      |      | 1000 | 1000 | 1006 | 1000 | 1000 | 1000 | 1000 | 1000 | 1000 | 1001 | 1080 | 1000 | 1005 | 1000 | 1000 | 1000 | 16092 |
| Burkina Faso       | 1000 | 1000 | 1000 |      | 1000 | 1000 | 1000 | 1008 | 1000 | 1000 | 1000 | 1000 | 1000 | 1000 | 1007 | 1000 |      | 1000 | 1000 | 17015 |
| Burundi            | 1000 |      | 1000 | 1000 |      |      |      |      |      |      |      |      |      |      |      |      |      |      |      | 4000  |
| Cambodia           | 1000 | 1000 | 1024 | 1000 | 1000 | 1000 | 1000 | 1000 | 1000 | 1000 | 1000 | 1600 | 1000 | 1000 | 1002 | 1000 | 1000 | 1000 | 1000 | 19626 |
| Cameroon           | 1000 | 1000 | 1000 | 1000 | 1200 | 1000 | 1000 | 1000 | 1000 | 1000 | 1000 | 1000 | 1000 | 1000 | 1000 | 1000 | 1000 | 1000 | 1000 | 19200 |
| Canada             | 1355 | 1010 | 1005 | 1011 | 1007 | 1013 | 2005 | 1021 | 2025 | 1011 | 1016 | 1005 | 1009 | 1031 | 1006 | 1008 | 1014 | 1004 | 1024 | 21580 |
| C. A. R.           |      | 1000 |      |      | 1000 | 1000 |      |      |      |      |      | 1000 | 1000 |      |      |      |      |      |      | 3000  |
| Chad               | 1000 | 1000 | 1000 | 1000 | 1000 | 1000 | 1000 | 1000 | 1000 | 1000 | 1000 | 1000 | 1000 | 1111 |      |      | 1000 | 1000 | 1000 | 17111 |
| Chile              | 1007 | 1023 | 1108 | 1009 | 1007 | 1009 | 1003 | 1001 | 1032 | 1040 | 1008 | 1040 | 1000 | 1060 | 1000 | 1001 | 1000 | 1000 | 1000 | 19348 |
| China              | 3730 | 4238 | 4383 | 4201 | 4151 | 4220 | 9413 | 4244 | 4696 | 4265 | 4373 | 4141 | 3649 | 3709 | 3503 | 3500 |      | 2221 | 1009 | 73646 |
| Colombia           | 1000 | 1000 | 1000 | 1000 | 1000 | 1000 | 1000 | 1000 | 1000 | 1000 | 1000 | 1000 | 1000 | 1000 | 1000 | 1000 | 1000 | 1003 | 1000 | 19003 |
| Comoros            |      |      |      | 2000 | 2000 | 2000 | 1000 |      |      |      |      |      |      | 1000 | 1000 |      | 1000 | 1001 | 1000 | 12001 |
| Congo              |      |      | 1000 | 1000 |      | 1000 | 1000 | 1000 | 1000 | 1000 | 1000 | 1000 | 1000 | 1090 | 1002 | 1000 | 1000 | 1000 | 1000 | 16092 |
| Congo (DRC)        |      |      |      |      |      | 1000 | 1000 | 1000 | 1000 | 1000 | 1000 | 1000 |      |      |      |      | 1000 | 1000 | 1000 | 10000 |
| Costa Rica         | 1002 | 1002 | 1000 | 1000 | 1006 | 1000 | 1000 | 1000 | 1000 | 1000 | 1000 | 1000 | 1000 | 1000 | 1000 | 1001 | 1000 | 1000 | 1003 | 19014 |
| Cote D'Ivoire      |      |      |      | 1000 |      |      |      | 1008 | 1000 | 1000 | 1000 | 1000 | 1000 | 1000 | 1021 | 1000 | 1000 | 1000 | 1000 | 13029 |
| Croatia            | 1000 |      | 1001 | 1009 | 1029 | 1029 | 1000 | 1000 | 1000 | 1000 | 1000 | 1000 | 1000 | 1080 | 1002 | 1002 | 1002 | 1004 | 1000 | 18158 |
| Cuba               | 1000 |      |      |      |      |      |      |      |      |      |      |      |      |      |      |      |      |      | 1010 | 2010  |
| Cyprus             | 1000 |      |      | 502  | 1005 | 1005 | 1000 | 500  | 2000 | 1029 | 1006 | 1008 | 1026 | 1043 | 1005 | 1019 | 1014 | 1022 |      | 16184 |
| Czech Republic     | 1001 | 1072 |      | 1077 | 1005 | 1000 | 1000 | 1001 | 1008 | 1000 | 1000 | 1000 | 1000 |      | 1004 | 1008 | 1003 | 1003 | 1003 | 17185 |
| Denmark            | 1004 | 1009 | 1001 | 1000 | 1000 | 1005 | 1001 | 753  | 2002 | 1005 | 1000 | 1000 | 1000 | 1025 | 1000 | 1010 | 1001 | 1008 | 1005 | 19829 |
| Djibouti           |      |      | 1000 | 2000 | 1000 | 1000 |      |      |      |      |      |      |      |      |      |      |      |      |      | 4000  |
| Dominican Republic | 1000 | 1000 | 1000 | 1000 | 1000 | 1000 | 1000 | 1000 | 1000 | 1000 | 1000 | 1000 | 1000 | 1078 | 1000 | 1001 | 1000 | 1000 | 1000 | 19079 |
| Ecuador            | 1067 | 1061 | 1001 | 1000 | 1000 | 1003 |      | 1000 | 1000 | 1000 | 1000 | 1000 | 1000 | 1000 | 1000 | 1000 | 1000 | 1000 | 1000 | 18132 |
| Egypt              | 999  | 1024 | 1105 | 2112 | 2053 | 4219 | 4186 | 1149 | 1000 | 1000 | 1000 | 1000 | 1000 | 2070 | 1002 | 1002 | 1001 | 1001 | 1001 | 28924 |
| El Salvador        | 1000 | 1001 | 1000 | 1006 | 1001 | 1000 | 1000 | 1000 | 1000 | 1000 | 1000 | 1000 | 1000 | 1080 | 1000 | 1001 | 1000 | 1000 | 1000 | 19089 |
| Estonia            | 1003 | 1001 | 601  | 607  |      | 1007 | 1004 | 1010 | 1000 | 1000 | 1000 | 1000 | 1000 | 1080 | 1000 | 1024 | 1004 | 1006 | 1006 | 17353 |
| Eswatini           |      |      |      |      |      |      |      |      |      |      |      |      |      | 1000 | 1110 |      | 1000 | 1000 | 1043 | 5153  |
| Ethiopia           |      |      |      |      |      |      | 2000 | 1000 | 1004 | 1000 | 1000 | 1000 | 1000 | 2222 | 1003 |      | 1000 | 1000 | 1001 | 14230 |
| Finland            | 1010 |      | 1005 |      | 1005 | 1000 | 1000 | 750  | 2001 | 1000 | 1000 | 1000 | 1000 | 1025 | 1000 | 1005 | 1000 | 1011 | 1000 | 17812 |
| France             | 1002 | 1220 | 1006 | 1000 | 1004 | 1001 | 2005 | 751  | 2000 | 1000 | 1000 | 1000 | 1000 | 1025 | 1000 | 1000 | 1000 | 1000 | 1000 | 21014 |
| Gabon              |      |      |      |      |      | 1000 | 1000 | 1008 | 1008 | 1000 | 1000 | 1000 | 1000 | 1070 | 1000 | 1000 | 1000 | 1000 | 1000 | 14086 |
| Gambia             |      |      |      |      |      |      |      |      |      |      |      |      | 1000 | 1000 | 1120 |      | 1000 | 1000 | 1016 | 6136  |
| Georgia            | 1000 | 1000 | 1080 | 1000 | 1000 | 1000 | 1000 | 1000 | 1000 | 1000 | 1000 | 1000 | 1000 | 1080 | 1003 | 1001 | 1000 | 1000 | 1000 | 19164 |

|            |      |      |      |      |      |       |       |      |      |      |      |      |      |      |      |      |      |      |      |       |
|------------|------|------|------|------|------|-------|-------|------|------|------|------|------|------|------|------|------|------|------|------|-------|
| Germany    | 1001 | 1221 | 4014 | 1000 | 1007 | 11104 | 13269 | 751  | 2014 | 1000 | 2000 | 1000 | 1000 | 1025 | 1000 | 1000 | 1002 | 1001 | 1000 | 46409 |
| Ghana      | 1000 | 1000 | 1000 | 1000 | 1000 | 1000  | 1000  | 1008 | 1000 | 1000 | 1000 | 1000 | 1000 | 1010 | 1000 | 1000 | 1000 | 1000 | 1000 | 19018 |
| Greece     | 1002 | 1000 |      | 1000 | 1000 | 1000  | 1000  | 1003 | 1000 | 1000 | 1000 | 1000 | 1000 | 1080 | 1002 | 1006 | 1000 | 1006 | 1004 | 18103 |
| Guatemala  | 1021 | 1000 | 1000 | 1015 | 1014 | 1000  | 1000  | 1000 | 1000 | 1000 | 1000 | 1000 | 1000 | 1100 |      |      | 1000 | 1000 | 1000 | 17150 |
| Guinea     |      |      |      |      |      | 1000  | 1000  | 1008 | 1000 | 1000 | 1000 | 1000 | 1000 | 1140 | 1005 | 1000 | 1000 | 1000 | 1000 | 14153 |
| Guyana     |      | 501  |      |      |      |       |       |      |      |      |      |      |      |      |      |      |      |      |      | 501   |
| Haiti      | 505  |      | 500  |      | 504  | 504   | 504   | 504  | 504  | 504  | 504  | 504  | 500  |      |      |      |      |      |      | 5033  |
| Honduras   | 1000 | 1000 | 1000 | 1002 | 1000 | 1002  | 1000  | 1000 | 1000 | 1000 | 1000 | 1000 | 1000 | 1000 |      | 1005 | 1000 | 1000 | 1004 | 18013 |
| Hong Kong  | 800  |      | 751  | 755  | 756  | 1028  | 1006  |      | 2017 |      | 1005 | 1007 |      | 1004 | 1005 | 1007 | 1004 | 1005 | 1006 | 15156 |
| Hungary    | 1025 | 1010 | 1008 |      | 1008 | 1014  | 1004  | 1019 | 1003 | 1000 | 1000 | 1000 | 1000 | 1080 | 1001 | 1000 | 1009 | 1006 | 1006 | 18193 |
| Iceland    |      |      | 502  |      |      |       | 1002  | 502  |      | 596  | 529  | 500  |      | 504  | 501  | 500  | 500  | 507  | 500  | 6141  |
| India      | 2100 | 3186 | 2000 | 3010 | 6000 | 3518  | 12620 | 1500 | 3000 | 3000 | 3000 | 3000 | 3000 | 6643 | 9453 | 3000 | 3000 | 3009 | 3086 | 77125 |
| Indonesia  | 1180 | 1000 | 1050 | 1080 | 1080 | 1000  | 3000  | 1000 | 1000 | 1000 | 1000 | 1000 | 1000 | 2192 | 1062 | 1063 | 1002 | 1000 | 1073 | 22782 |
| Iran       | 1300 | 1004 | 1040 |      |      | 1003  | 3507  | 1000 | 2009 | 1001 | 1000 | 1000 | 1002 | 1058 | 1009 | 1011 | 1007 | 1007 | 1008 | 20966 |
| Iraq       |      |      | 990  | 2000 | 2000 | 2000  | 2000  | 1003 | 2010 | 1009 | 1011 | 1000 | 1000 | 1097 | 1000 | 1002 | 1046 | 1035 | 1000 | 22203 |
| Ireland    | 1000 |      | 1001 | 500  | 1001 | 1000  | 1000  | 1000 | 2000 | 1000 | 1000 | 1000 | 1000 | 1025 | 1000 | 1000 | 1000 | 1002 | 1000 | 18529 |
| Israel     | 1002 | 1001 | 1001 | 1000 | 1000 | 1000  | 1000  | 1000 | 1000 | 1000 | 1000 | 1000 | 1010 | 1095 | 1057 | 1001 | 1000 | 1001 | 1001 | 19169 |
| Italy      | 1002 | 1008 | 1008 | 1005 | 1008 | 1005  | 2007  | 1004 | 2000 | 1000 | 1000 | 1000 | 1000 | 1025 | 1000 | 1000 | 1000 | 1000 | 1001 | 21073 |
| Jamaica    | 543  |      |      |      |      | 506   |       | 504  | 504  |      |      | 504  |      | 501  | 502  | 505  | 500  |      |      | 4569  |
| Japan      | 1000 | 1150 | 3000 | 1000 | 1000 | 1000  | 2000  | 1001 | 2006 | 1003 | 1003 | 1002 | 1003 | 1023 | 1016 | 1007 | 1005 | 1009 | 1008 | 23236 |
| Jordan     | 1000 | 1016 | 1007 | 2016 | 2000 | 2000  | 2000  | 1000 | 1000 | 1000 | 1000 | 1012 | 1002 | 1001 | 1012 | 1000 | 1000 | 1000 | 1006 | 23072 |
| Kazakhstan | 1000 | 1000 | 1000 | 1000 | 1000 | 1000  | 1000  | 1000 | 1000 | 1000 | 1000 | 1000 | 1000 | 1080 | 1000 | 1000 | 1000 | 1000 | 1000 | 19080 |
| Kenya      | 1000 | 1000 | 2200 | 1000 | 1000 | 1000  | 1000  | 1000 | 1000 | 1000 | 1000 | 1000 | 1000 | 1001 | 1008 | 1000 | 1000 | 1002 | 1003 | 20214 |
| Kosovo     | 1046 |      | 1047 | 1000 | 1017 | 1047  | 1024  | 1000 | 1001 | 1000 | 1000 | 1000 | 1000 | 1088 | 1000 | 1000 | 1000 | 1001 | 1000 | 18271 |
| Kuwait     | 1000 |      |      | 2000 | 2004 | 2000  | 1000  | 1008 | 2013 | 1000 | 1000 | 1000 | 1000 | 1023 |      |      | 1004 | 1071 | 1003 | 19126 |
| Kyrgyzstan | 1000 | 1000 | 1000 | 1000 | 1000 | 1000  | 1000  | 1000 | 1000 | 1000 | 1000 | 1000 | 1000 | 1080 | 1000 | 1001 | 1000 | 1000 | 1000 | 19081 |
| Laos       | 1001 | 1000 | 1000 |      |      | 1000  | 1000  |      |      |      |      | 1000 | 2504 | 1070 | 1000 | 1000 | 1000 | 1000 | 1000 | 14575 |
| Latvia     | 1000 | 1017 | 513  | 515  |      | 1006  | 1001  | 1000 | 1002 | 1001 | 1019 | 1002 | 1021 | 1080 | 1001 | 1017 | 1014 | 1001 | 1001 | 17211 |
| Lebanon    | 996  | 1000 | 1000 | 1010 | 2027 | 2007  | 2013  | 1000 | 1000 | 1000 | 1000 | 1000 | 1000 | 1040 | 1050 | 1000 | 1000 |      | 1004 | 21147 |
| Lesotho    |      |      |      |      |      | 1000  |       | 1000 |      |      |      | 1000 | 1000 | 1000 |      |      | 1010 | 1000 | 1020 | 8030  |
| Liberia    |      | 1000 | 1000 |      | 1000 | 1000  |       |      |      | 1000 | 1000 | 1000 | 1000 | 1000 |      |      | 1001 | 1000 | 1000 | 12001 |
| Libya      |      |      |      |      |      |       | 1002  |      | 1000 | 1006 | 1001 | 1007 | 1004 | 1040 |      |      | 1000 | 1016 | 1000 | 9074  |
| Lithuania  | 1015 | 1007 | 506  | 500  | 1001 | 1000  | 1000  | 1000 | 1000 | 1000 | 1000 | 1000 | 1000 | 1080 | 1002 | 1009 | 1000 | 1000 | 1012 | 18132 |
| Luxembourg |      |      | 500  |      | 1002 | 1000  | 1001  | 500  | 2000 | 1000 | 1000 | 1000 | 1000 | 1025 |      |      | 1000 | 1000 |      | 12027 |
| Macedonia  | 1042 |      | 1016 | 1008 | 1000 | 1018  | 1025  | 1020 | 1000 | 1024 | 1024 | 1008 | 1008 |      |      |      |      |      |      | 11168 |
| Madagascar | 1000 |      | 1000 |      |      | 1000  | 1000  | 1008 | 1008 | 1000 | 1000 | 1000 | 1000 | 1000 |      |      | 1000 | 1000 | 1000 | 13016 |

|                  |      |      |      |      |      |      |      |      |      |      |      |      |      |      |      |      |      |      |      |       |      |
|------------------|------|------|------|------|------|------|------|------|------|------|------|------|------|------|------|------|------|------|------|-------|------|
| Malawi           | 1000 | 1000 |      | 1000 |      | 1000 | 1000 | 1000 | 1000 | 1000 | 1000 | 1000 | 1000 | 1000 | 1000 | 1000 | 1000 | 1002 | 1002 | 15004 |      |
| Maldives         |      |      |      |      |      |      |      |      |      |      |      |      | 1000 |      |      |      |      |      |      | 1000  |      |
| Malaysia         | 1012 | 1233 | 1000 | 1011 | 1000 | 1000 | 1000 | 1000 | 2008 | 1002 | 1000 |      | 1000 | 1060 | 1000 | 1000 | 1000 | 1000 | 1000 | 18314 |      |
| Mali             | 1000 |      | 1000 | 1000 | 1000 | 1000 | 1000 | 1000 | 1000 | 1000 |      | 1000 | 1000 | 1130 | 1000 | 1000 | 1000 | 1000 | 1000 | 16130 |      |
| Malta            |      |      | 508  |      | 1008 | 1004 | 1004 | 500  | 2013 | 1002 | 1011 | 1004 | 1010 | 1027 | 1001 | 1001 | 1002 | 1002 | 1006 | 15595 |      |
| Mauritania       |      | 1000 | 1000 | 1984 | 2000 | 2000 | 1000 | 1008 | 1000 | 1000 | 1000 | 1000 | 1000 | 1100 |      |      | 1000 | 1000 | 1000 | 19092 |      |
| Mauritius        |      |      |      |      |      | 1000 |      |      | 1000 |      | 1000 | 1000 | 1000 | 1059 | 1000 | 1000 | 1000 | 1000 | 1000 | 10059 |      |
| Mexico           | 1007 | 999  | 1000 | 1000 | 1000 | 1000 | 2000 | 1000 | 1017 | 1031 | 1000 | 1000 | 1034 | 1001 | 1010 | 1000 | 1000 | 1000 | 1038 | 20137 |      |
| Moldova          | 1000 | 1000 | 1000 | 1000 | 1000 | 1000 | 1000 | 1000 | 1000 | 1000 | 1000 | 1000 | 1000 | 1080 | 1000 | 1000 | 1000 | 1000 | 1000 | 19080 |      |
| Mongolia         |      | 1000 | 1000 |      | 1000 | 1000 | 1000 | 1000 | 1000 | 1000 | 1000 | 1000 | 1000 | 1070 | 1000 | 1000 | 1000 | 1000 | 1000 | 17070 |      |
| Montenegro       | 834  |      | 1000 | 1003 | 1000 | 1000 | 1000 | 1000 | 1000 | 1000 | 1000 | 1000 | 1000 | 1080 | 1004 |      | 1000 | 1000 | 1000 | 16921 |      |
| Morocco          |      |      |      |      | 1002 | 2001 | 2000 | 1007 | 998  | 1052 | 1008 | 1006 | 1001 | 1015 | 1006 | 1001 | 1015 | 1015 | 1019 | 17146 |      |
| Mozambique       | 1000 | 1000 | 1000 |      |      | 1000 |      |      |      |      |      | 1000 | 1000 | 1000 |      | 1000 | 1000 | 1000 | 1000 | 12000 |      |
| Myanmar          |      |      |      |      |      |      | 1020 | 1020 | 1020 | 1020 | 1020 | 1600 | 1000 | 1100 | 1000 | 1000 | 1000 | 1000 | 1001 | 13801 |      |
| Nagorno-Karabakh |      |      |      |      |      |      |      | 1000 |      |      |      |      |      |      |      |      |      |      |      | 1000  |      |
| Namibia          |      | 1000 |      |      |      |      |      |      | 1000 |      |      | 1000 | 1005 | 1002 | 1000 | 1001 | 1003 | 1000 | 1000 | 10011 |      |
| Nepal            | 1002 | 1000 | 1003 | 1002 | 1000 | 1000 | 2000 | 1050 | 1050 | 1000 | 1000 | 1000 | 1000 | 2095 | 1000 | 1000 | 1000 | 1000 | 1000 | 21202 |      |
| Netherlands      | 1000 | 1000 | 1000 |      | 1001 | 1000 | 1000 | 751  | 2002 | 1003 | 1000 | 1001 | 1002 | 1029 | 1006 | 1000 | 1006 | 1016 | 1004 | 18821 |      |
| New Zealand      | 1028 | 750  | 750  |      | 750  | 1000 | 1008 | 500  | 2001 | 1007 | 1004 | 1001 | 1001 | 1042 | 1002 | 1000 | 1000 | 1000 | 1000 | 17844 |      |
| Nicaragua        | 1001 | 1000 | 1000 | 1012 | 1000 | 1003 | 1000 | 1000 | 1000 | 1000 | 1000 | 1000 | 1000 | 1080 | 1002 | 1010 | 1000 | 1000 | 1129 | 19237 |      |
| Niger            | 1000 | 1000 | 1000 | 1000 | 1000 | 1000 | 1000 | 1008 | 1008 | 1000 | 1000 | 1000 | 1000 | 1000 |      |      | 1000 | 1000 | 1000 | 17016 |      |
| Nigeria          | 1000 | 1000 | 1000 | 1000 | 1000 | 1000 | 2000 | 1002 | 1000 | 1000 | 1000 | 1000 | 1000 | 3000 | 1004 | 1000 | 1000 | 1000 | 1000 | 22006 |      |
| Northern Cyprus  |      |      |      |      |      |      | 500  | 502  | 2004 | 1000 | 1000 |      | 1000 | 1050 |      |      | 1000 | 609  | 1002 | 9167  |      |
| North Macedonia  |      |      |      |      |      |      |      |      |      |      |      |      |      | 1080 | 1003 | 1024 | 1000 | 1000 | 1005 | 6112  |      |
| Norway           | 1001 |      | 1000 |      |      |      | 1004 |      | 2000 | 1005 | 2000 | 1000 | 1000 | 1025 | 1000 | 1007 | 1002 | 1004 | 1007 | 16055 |      |
| Oman             |      |      |      |      |      | 2016 |      |      |      |      |      |      |      |      |      |      |      |      |      | 1003  | 3019 |
| Pakistan         | 1001 | 1502 | 2484 | 3122 | 1030 | 1000 | 3016 | 1000 | 1000 | 1000 | 1000 | 1600 | 1000 | 1091 | 1000 | 1000 | 1012 | 1001 | 1000 | 25859 |      |
| Palestine        | 1000 | 1000 | 1000 | 2014 | 2000 | 2000 | 2000 | 1000 | 1000 | 1000 | 1000 | 1000 | 1000 | 1090 |      |      | 1000 | 1000 | 1010 | 21114 |      |
| Panama           | 1005 | 1000 | 1004 | 1018 | 1000 | 1000 | 1001 | 1000 | 1000 | 1000 | 1000 | 1000 | 1000 | 1080 | 1000 | 1003 | 1000 | 1000 | 1000 | 19111 |      |
| Paraguay         | 1001 | 1000 | 1000 | 1000 | 1000 | 1000 | 1000 | 1000 | 1000 | 1000 | 1000 | 1000 | 1000 | 1079 |      | 1001 | 1000 | 1000 | 1000 | 18081 |      |
| Peru             | 1000 | 1000 | 1000 | 1000 | 1000 | 1000 | 1000 | 1000 | 1000 | 1000 | 1000 | 1000 | 1000 | 1000 | 1006 | 1000 | 1000 | 1000 | 1000 | 19006 |      |
| Philippines      | 1200 | 1000 | 1000 | 1000 | 1000 | 1000 | 2000 | 1000 | 1000 | 1000 | 1000 | 1000 | 1000 | 2090 | 1000 | 1000 | 1000 | 1000 | 1000 | 21290 |      |
| Poland           | 1000 |      | 1000 | 1000 | 1000 | 1029 | 1000 | 1000 | 1000 | 1000 | 1000 | 1000 | 1000 | 1080 | 1010 | 1001 | 1000 | 1002 | 1001 | 18123 |      |
| Portugal         | 1007 |      | 1002 | 1000 | 1000 | 1000 | 1001 | 1001 | 2020 | 1021 | 1008 | 1000 | 1003 | 1026 | 1002 | 1002 | 1002 | 1003 | 1001 | 19099 |      |
| Puerto Rico      | 500  |      |      |      |      |      |      |      | 500  |      |      |      |      |      |      |      | 500  |      |      | 1500  |      |
| Qatar            |      |      | 1012 | 1016 | 1000 | 2032 | 1000 |      | 1000 |      |      |      |      |      |      |      |      |      |      | 6060  |      |

|                    |      |      |      |      |      |       |       |      |      |      |      |      |      |      |      |      |      |      |      |       |
|--------------------|------|------|------|------|------|-------|-------|------|------|------|------|------|------|------|------|------|------|------|------|-------|
| Romania            | 1022 | 1000 |      | 1000 | 1000 | 1008  | 1000  | 1000 | 998  | 1001 | 1001 | 1001 | 1002 | 1080 | 1000 | 1009 | 1000 | 1000 | 1000 | 18122 |
| Russian Federation | 2011 | 2949 | 2019 | 2042 | 4000 | 2000  | 3000  | 2000 | 2000 | 2000 | 2000 | 2000 | 2000 | 3003 | 2022 | 2001 | 2006 | 2017 | 1000 | 42070 |
| Rwanda             | 1504 |      | 1000 | 1000 |      | 1000  | 1000  | 1000 | 1000 | 1000 | 1000 | 1000 | 1000 | 1000 |      |      |      |      | 1000 | 13504 |
| Saudi Arabia       | 1004 | 1006 | 1150 | 2052 | 2038 | 2022  | 2099  | 1001 | 2035 | 1012 | 1000 | 1002 | 1003 | 1045 | 1043 | 1008 | 1023 | 1021 | 1018 | 24582 |
| Senegal            | 1000 | 1000 | 1000 | 1000 | 1000 | 1000  | 1000  | 1000 | 1000 | 1000 | 1000 | 1000 | 1000 | 1000 | 1000 | 1000 | 1000 | 1000 | 1000 | 19000 |
| Serbia             | 1556 |      | 1000 | 1008 | 1000 | 1001  | 1023  | 1030 | 1000 | 1000 | 1000 | 1000 | 1000 | 1080 | 1002 | 1000 | 1001 | 1000 | 1000 | 18701 |
| Sierra Leone       | 1000 | 1000 | 1000 |      | 1000 | 1000  |       | 1008 | 1008 | 1000 | 1000 | 1000 | 1000 | 1133 |      | 1000 | 1000 | 1000 | 1000 | 16149 |
| Singapore          | 1095 | 1000 | 2551 | 1005 | 1001 | 1000  | 1000  |      | 1000 | 1000 | 1000 | 1000 | 1000 | 1040 |      | 1000 | 1028 | 1000 | 1000 | 18720 |
| Slovakia           | 1018 |      |      |      | 1007 | 1012  | 1007  | 1004 | 1000 | 1000 | 1000 | 1000 | 1000 | 1080 | 1001 | 1003 | 1001 | 1001 | 1001 | 16135 |
| Slovenia           | 1009 |      |      | 500  | 1002 | 1001  | 1000  | 1001 | 2020 | 1002 | 1000 | 1000 | 1000 | 1025 | 1001 | 1001 | 1030 | 1000 | 1001 | 17593 |
| Somalia            |      |      |      |      |      |       |       |      | 1000 | 1000 | 1191 |      |      |      |      |      |      | 1001 |      | 4192  |
| Somaliland         |      |      |      | 2000 | 2000 | 2000  | 1000  |      |      |      |      |      |      |      |      |      |      |      |      | 7000  |
| South Africa       | 1001 | 1000 | 1000 | 1000 | 1000 | 1000  | 2000  | 1000 | 1000 | 1000 | 1000 | 1000 | 1000 | 1060 | 1019 | 1032 | 1007 | 1000 | 1000 | 20119 |
| South Korea        | 1100 | 1000 | 1000 | 1000 | 1000 | 1001  | 2000  | 1000 | 2000 | 1000 | 1000 | 1000 | 1015 | 1016 | 1005 | 1001 | 1010 | 1003 | 1003 | 21154 |
| South Sudan        |      |      |      |      |      |       |       |      |      | 1000 | 1000 | 1000 | 1000 |      |      |      |      |      |      | 4000  |
| Spain              | 1000 | 1004 | 1009 | 1005 | 1005 | 1006  | 2003  | 1004 | 2000 | 1000 | 1000 | 1000 | 1000 | 1025 | 1000 | 1000 | 1000 | 1002 | 1000 | 21063 |
| Sri Lanka          | 1033 | 1000 | 1000 | 1000 | 1030 | 1000  | 2000  | 1030 | 1062 | 1062 |      | 1104 | 1109 | 1083 | 1000 | 1005 | 1000 | 1000 | 1000 | 19518 |
| Sudan              |      |      |      | 1774 | 1808 | 2000  | 1000  |      | 1000 |      |      |      |      |      |      |      |      |      |      | 7582  |
| Suriname           |      |      |      |      |      |       | 504   |      |      |      |      |      |      |      |      |      |      |      |      | 504   |
| Sweden             | 1000 | 1000 | 1000 | 1002 | 1002 | 1000  | 1000  | 750  | 2001 | 1000 | 1000 | 1000 | 1001 | 1025 | 1000 | 1010 | 1001 | 1001 | 1004 | 19797 |
| Switzerland        | 1000 |      |      | 1003 |      | 1006  | 1000  |      | 2010 | 501  | 1000 | 1000 | 1000 | 1025 | 1000 | 1000 | 1000 | 1001 | 1000 | 15546 |
| Syria              |      |      | 1209 | 2011 | 2035 | 2041  | 2043  | 1022 |      | 1002 |      |      |      |      |      |      |      |      |      | 11363 |
| Taiwan             | 1002 |      | 1000 |      | 1000 | 1001  | 1000  | 1000 | 2000 | 1000 | 1000 | 1000 | 1000 | 1030 | 1000 | 1000 | 1000 | 1003 | 1000 | 18036 |
| Tajikistan         | 1000 | 1000 | 1000 | 1000 | 1000 | 1000  | 1000  | 1000 | 1000 | 1000 | 1000 | 1000 | 3000 | 1080 | 1000 | 1000 | 1000 | 1001 | 1000 | 21081 |
| Tanzania           | 1000 | 1000 | 1000 | 1000 | 1000 | 1000  | 1000  | 1008 | 1008 | 1000 | 1000 | 1000 | 1000 | 1000 | 1001 | 1000 | 1001 | 1004 | 1001 | 19023 |
| Thailand           | 1410 | 1006 | 1038 | 1019 | 1000 | 1000  | 2000  | 1000 | 1000 | 1000 | 1000 | 1000 | 1000 | 2000 | 1000 | 1006 | 1000 | 1000 | 1003 | 21482 |
| Togo               | 1000 |      | 1000 |      |      | 1000  |       |      | 1000 | 1000 | 1000 | 1000 | 1000 | 1130 |      | 1000 | 1000 | 1000 | 1000 | 13130 |
| Trin & Tobago      | 508  |      | 502  |      |      | 504   |       | 504  |      |      |      | 504  |      |      |      |      |      |      | 502  | 3024  |
| Tunisia            |      |      |      | 1006 | 2085 | 2034  | 2053  | 1053 | 1056 | 1000 | 1001 | 1001 | 1001 |      | 1003 | 1000 | 1000 | 1000 | 1000 | 18293 |
| Turkey             | 995  | 1001 | 1004 | 999  | 1000 | 1001  | 2000  | 1000 | 2003 | 1002 | 1001 | 1000 | 1000 | 1000 | 1000 | 1000 | 1000 | 1000 | 1000 | 21006 |
| Turkmenistan       |      |      |      | 1000 |      | 1000  | 1000  | 1000 | 1000 | 1000 | 1000 | 1000 | 1000 | 2059 |      |      |      |      |      | 11059 |
| Uganda             | 1000 | 1000 | 1000 | 1000 | 1000 | 1000  | 1000  | 1000 | 1000 | 1000 | 1000 | 1000 | 1000 | 1089 | 1016 | 1000 | 1000 | 1000 | 1009 | 19114 |
| Ukraine            | 1102 | 1066 | 1074 | 1081 | 1000 | 1000  | 1000  | 1000 | 1000 | 1000 | 1000 | 1000 | 1000 | 1000 | 1001 | 1000 | 1000 | 1000 | 1000 | 19324 |
| UAE                | 1013 |      |      | 2054 | 2066 | 2036  | 2016  | 1000 | 2007 | 1898 | 1855 | 1855 | 1857 | 1080 | 2928 | 1002 | 1030 | 1000 | 1000 | 26684 |
| UK                 | 1037 | 1204 | 1001 | 1002 | 1000 | 11259 | 13408 | 750  | 2000 | 1000 | 1000 | 1000 | 1000 | 1413 | 1000 | 1000 | 1000 | 1000 | 1000 | 43074 |
| US                 | 1001 | 1225 | 1004 | 1003 | 1005 | 1008  | 2094  | 1005 | 2048 | 1019 | 1032 | 1013 | 1004 | 1025 | 1007 | 1005 | 1003 | 1005 | 1000 | 21506 |

|                         |        |        |        |        |        |        |        |        |        |        |        |        |        |        |        |        |        |        |        |         |
|-------------------------|--------|--------|--------|--------|--------|--------|--------|--------|--------|--------|--------|--------|--------|--------|--------|--------|--------|--------|--------|---------|
| Uruguay                 | 1004   | 1004   | 1005   | 1000   | 1000   | 1000   | 1009   | 1000   | 1000   | 1000   | 1000   | 1000   | 1000   | 1026   | 1001   | 1000   | 1000   | 1000   | 1000   | 19049   |
| Uzbekistan              | 1000   |        | 1000   | 1000   | 1000   | 1000   | 1000   | 1000   | 1000   | 1000   | 1000   | 1000   | 1000   | 1080   | 1000   | 1000   | 1000   | 1000   | 1000   | 18080   |
| Venezuela               | 1000   | 1000   | 1000   | 1000   | 1000   | 1000   | 1000   | 1000   | 1000   | 1000   | 1000   | 1000   | 1000   | 1080   | 1000   | 1000   | 1000   | 1002   | 1002   | 19084   |
| Vietnam                 | 1023   | 1018   | 1016   | 1009   | 1000   | 1000   | 2000   | 1017   | 1000   | 1000   | 1039   | 1002   | 1012   | 2000   | 1000   | 1020   | 1000   | 1000   | 1000   | 21156   |
| Yemen                   | 1000   |        |        | 2000   | 2000   | 2000   | 2000   | 1000   | 1000   | 1000   | 1000   | 1000   | 1000   | 1140   |        |        | 1000   | 1000   |        | 18140   |
| Zambia                  | 1001   | 1000   | 1000   | 1000   |        | 1000   | 1000   | 1000   | 1000   | 1000   | 1000   | 1000   | 1000   | 1000   | 1026   | 1000   | 1000   | 1000   | 1002   | 18029   |
| Zimbabwe                | 1000   | 1000   | 1000   | 1000   | 1000   | 1000   | 1000   | 1000   | 1000   | 1000   | 1000   | 1000   | 1000   | 1082   | 1004   | 1000   | 1000   | 1000   | 1001   | 19087   |
| Participant total       | 129969 | 103830 | 130488 | 136966 | 150898 | 196396 | 229537 | 137173 | 190348 | 148232 | 150725 | 155171 | 152874 | 175173 | 129474 | 126902 | 143687 | 145702 | 144662 | 2878207 |
| Country/territory total | 123    | 95     | 119    | 115    | 124    | 148    | 141    | 138    | 149    | 142    | 142    | 148    | 143    | 144    | 116    | 122    | 142    | 142    | 143    |         |

**Table S2. Global Cantril Ladder (2006-2024) – participant numbers, means, and standard deviations**

| Age          | 2006        |      |          | 2007        |      |          | 2008        |      |          | 2009        |      |          | 2010        |      |          | 2011        |      |          | 2012        |      |          |
|--------------|-------------|------|----------|-------------|------|----------|-------------|------|----------|-------------|------|----------|-------------|------|----------|-------------|------|----------|-------------|------|----------|
|              | N.          | Mean | St. dev. |
| 15-19        | 11912       | 5.63 | 2.21     | 11111       | 5.66 | 2.17     | 13365       | 5.63 | 2.17     | 14897       | 5.70 | 2.17     | 15340       | 5.67 | 2.17     | 18942       | 5.64 | 2.23     | 20936       | 5.67 | 2.24     |
| 20-24        | 14827       | 5.46 | 2.17     | 11961       | 5.41 | 2.05     | 14172       | 5.35 | 2.08     | 16580       | 5.46 | 2.08     | 16784       | 5.48 | 2.07     | 20994       | 5.47 | 2.15     | 22788       | 5.52 | 2.20     |
| 25-29        | 14482       | 5.39 | 2.14     | 11871       | 5.40 | 2.06     | 14291       | 5.32 | 2.06     | 16858       | 5.39 | 2.11     | 17068       | 5.39 | 2.11     | 21502       | 5.39 | 2.14     | 24135       | 5.41 | 2.17     |
| 30-34        | 13321       | 5.46 | 2.20     | 10778       | 5.41 | 2.09     | 12546       | 5.38 | 2.10     | 14723       | 5.41 | 2.11     | 15221       | 5.43 | 2.11     | 19207       | 5.42 | 2.17     | 23013       | 5.42 | 2.20     |
| 35-39        | 12808       | 5.50 | 2.21     | 10459       | 5.43 | 2.11     | 12499       | 5.43 | 2.11     | 13715       | 5.37 | 2.13     | 14838       | 5.48 | 2.14     | 18059       | 5.46 | 2.17     | 21523       | 5.44 | 2.26     |
| 40-44        | 11873       | 5.48 | 2.18     | 9214        | 5.42 | 2.14     | 11396       | 5.43 | 2.17     | 12317       | 5.39 | 2.15     | 13405       | 5.47 | 2.17     | 16973       | 5.53 | 2.18     | 20474       | 5.52 | 2.23     |
| 45-49        | 10125       | 5.39 | 2.20     | 8114        | 5.47 | 2.14     | 10070       | 5.45 | 2.16     | 10723       | 5.36 | 2.14     | 12400       | 5.46 | 2.17     | 15512       | 5.52 | 2.20     | 18692       | 5.55 | 2.24     |
| 50-54        | 9233        | 5.37 | 2.28     | 7156        | 5.50 | 2.20     | 8947        | 5.52 | 2.20     | 9097        | 5.29 | 2.18     | 11051       | 5.45 | 2.21     | 13790       | 5.50 | 2.24     | 17381       | 5.58 | 2.27     |
| 55-59        | 7463        | 5.51 | 2.35     | 5727        | 5.52 | 2.23     | 7329        | 5.60 | 2.21     | 7420        | 5.38 | 2.21     | 9123        | 5.50 | 2.26     | 11554       | 5.54 | 2.26     | 14512       | 5.62 | 2.29     |
| 60-64        | 6359        | 5.52 | 2.39     | 4861        | 5.67 | 2.32     | 6283        | 5.64 | 2.30     | 6494        | 5.43 | 2.29     | 7940        | 5.55 | 2.30     | 11163       | 5.71 | 2.29     | 14115       | 5.73 | 2.35     |
| 65-69        | 5040        | 5.45 | 2.40     | 4040        | 5.51 | 2.30     | 5084        | 5.73 | 2.30     | 4998        | 5.40 | 2.33     | 5898        | 5.52 | 2.31     | 7570        | 5.73 | 2.33     | 9985        | 5.82 | 2.36     |
| 70-74        | 3945        | 5.41 | 2.49     | 3040        | 5.44 | 2.43     | 3943        | 5.70 | 2.35     | 4010        | 5.23 | 2.34     | 4830        | 5.37 | 2.37     | 6475        | 5.60 | 2.38     | 8549        | 5.77 | 2.39     |
| 75-79        | 2483        | 5.41 | 2.49     | 1929        | 5.54 | 2.41     | 2433        | 5.70 | 2.37     | 2298        | 5.20 | 2.44     | 2915        | 5.39 | 2.37     | 3938        | 5.60 | 2.34     | 5311        | 5.76 | 2.43     |
| 80-84        | 1466        | 5.49 | 2.60     | 927         | 5.65 | 2.47     | 1326        | 5.80 | 2.47     | 1330        | 5.30 | 2.53     | 1638        | 5.40 | 2.48     | 2376        | 5.74 | 2.41     | 3072        | 5.75 | 2.45     |
| 85-89        | 388         | 5.84 | 2.57     | 347         | 5.69 | 2.23     | 507         | 5.89 | 2.45     | 404         | 5.43 | 2.71     | 582         | 5.62 | 2.50     | 911         | 5.83 | 2.40     | 1187        | 5.91 | 2.47     |
| 90-94        | 77          | 5.42 | 2.69     | 48          | 4.83 | 2.44     | 84          | 6.14 | 2.55     | 79          | 5.14 | 2.56     | 139         | 5.48 | 2.57     | 213         | 5.47 | 2.60     | 315         | 6.04 | 2.67     |
| <b>Total</b> | 125802      | 5.48 | 2.35     | 101583      | 5.47 | 2.24     | 124275      | 5.61 | 2.25     | 135943      | 5.37 | 2.28     | 149172      | 5.48 | 2.27     | 189179      | 5.57 | 2.28     | 225988      | 5.66 | 2.33     |
|              | <b>2013</b> |      |          | <b>2014</b> |      |          | <b>2015</b> |      |          | <b>2016</b> |      |          | <b>2017</b> |      |          | <b>2018</b> |      |          | <b>2019</b> |      |          |

| Age          | N.            | Mean        | St. dev.    |
|--------------|---------------|-------------|-------------|---------------|-------------|-------------|---------------|-------------|-------------|---------------|-------------|-------------|---------------|-------------|-------------|---------------|-------------|-------------|---------------|-------------|-------------|
| 15-19        | 12984         | 5.47        | 2.36        | 15926         | 5.67        | 2.42        | 13213         | 5.50        | 2.44        | 13170         | 5.47        | 2.54        | 13415         | 5.59        | 2.88        | 13282         | 5.77        | 2.81        | 15481         | 5.65        | 2.81        |
| 20-24        | 14601         | 5.40        | 2.28        | 18210         | 5.58        | 2.34        | 15482         | 5.44        | 2.36        | 15071         | 5.44        | 2.40        | 15759         | 5.44        | 2.52        | 15296         | 5.51        | 2.54        | 18609         | 5.44        | 2.71        |
| 25-29        | 15680         | 5.28        | 2.26        | 20012         | 5.47        | 2.32        | 16314         | 5.33        | 2.34        | 16655         | 5.32        | 2.38        | 17171         | 5.32        | 2.46        | 17130         | 5.40        | 2.48        | 19481         | 5.32        | 2.66        |
| 30-34        | 14402         | 5.28        | 2.27        | 19297         | 5.53        | 2.33        | 15547         | 5.35        | 2.34        | 15648         | 5.34        | 2.39        | 16223         | 5.39        | 2.42        | 16092         | 5.38        | 2.47        | 18287         | 5.33        | 2.64        |
| 35-39        | 13221         | 5.31        | 2.27        | 17385         | 5.57        | 2.32        | 14067         | 5.33        | 2.37        | 13965         | 5.29        | 2.36        | 14594         | 5.37        | 2.46        | 14695         | 5.34        | 2.48        | 16518         | 5.31        | 2.63        |
| 40-44        | 11949         | 5.34        | 2.28        | 16647         | 5.60        | 2.34        | 12654         | 5.39        | 2.37        | 12728         | 5.39        | 2.36        | 12822         | 5.45        | 2.45        | 12405         | 5.40        | 2.49        | 14159         | 5.43        | 2.60        |
| 45-49        | 11107         | 5.39        | 2.27        | 14998         | 5.62        | 2.31        | 11248         | 5.36        | 2.34        | 11456         | 5.43        | 2.40        | 11502         | 5.43        | 2.43        | 11121         | 5.44        | 2.46        | 12725         | 5.42        | 2.63        |
| 50-54        | 10454         | 5.36        | 2.35        | 14826         | 5.63        | 2.37        | 11002         | 5.37        | 2.39        | 11139         | 5.49        | 2.40        | 10885         | 5.43        | 2.48        | 10536         | 5.53        | 2.49        | 12129         | 5.54        | 2.62        |
| 55-59        | 8529          | 5.40        | 2.36        | 12364         | 5.73        | 2.37        | 9337          | 5.42        | 2.41        | 9360          | 5.50        | 2.44        | 9794          | 5.48        | 2.48        | 9487          | 5.57        | 2.46        | 11008         | 5.50        | 2.60        |
| 60-64        | 8073          | 5.39        | 2.40        | 11898         | 5.77        | 2.40        | 8910          | 5.42        | 2.41        | 9001          | 5.52        | 2.48        | 8942          | 5.49        | 2.52        | 8785          | 5.54        | 2.52        | 10417         | 5.40        | 2.70        |
| 65-69        | 5685          | 5.43        | 2.39        | 9642          | 5.93        | 2.38        | 7314          | 5.64        | 2.45        | 7579          | 5.70        | 2.47        | 7822          | 5.70        | 2.51        | 7761          | 5.68        | 2.54        | 9060          | 5.63        | 2.65        |
| 70-74        | 4334          | 5.28        | 2.54        | 7239          | 5.80        | 2.46        | 5110          | 5.59        | 2.50        | 5634          | 5.69        | 2.51        | 5798          | 5.67        | 2.60        | 5811          | 5.18        | 2.57        | 7055          | 5.74        | 2.72        |
| 75-79        | 2873          | 5.32        | 2.48        | 4485          | 5.74        | 2.49        | 3427          | 5.50        | 2.56        | 3631          | 5.67        | 2.54        | 3770          | 5.61        | 2.67        | 3567          | 5.78        | 2.62        | 3947          | 5.70        | 2.77        |
| 80-84        | 1589          | 5.41        | 2.55        | 2681          | 5.80        | 2.61        | 1817          | 5.54        | 2.63        | 2190          | 5.61        | 2.53        | 2163          | 5.61        | 2.72        | 2026          | 5.60        | 2.75        | 2464          | 5.63        | 2.79        |
| 85-89        | 618           | 5.38        | 2.62        | 930           | 5.73        | 2.70        | 781           | 5.51        | 2.82        | 871           | 5.68        | 2.69        | 903           | 5.62        | 2.88        | 774           | 5.60        | 2.73        | 897           | 5.71        | 2.84        |
| 90-94        | 168           | 5.40        | 2.70        | 234           | 5.82        | 2.57        | 176           | 5.41        | 2.84        | 230           | 5.60        | 2.89        | 230           | 5.70        | 3.05        | 170           | 6.02        | 2.79        | 232           | 5.68        | 2.78        |
| <b>Total</b> | <b>136267</b> | <b>5.37</b> | <b>2.40</b> | <b>186774</b> | <b>5.69</b> | <b>2.42</b> | <b>146399</b> | <b>5.44</b> | <b>2.47</b> | <b>148328</b> | <b>5.51</b> | <b>2.49</b> | <b>151793</b> | <b>5.52</b> | <b>2.60</b> | <b>148938</b> | <b>5.55</b> | <b>2.58</b> | <b>172469</b> | <b>5.53</b> | <b>2.70</b> |

|       | 2020  |      |          | 2021  |      |          | 2022  |      |          | 2023  |      |          | 2024  |      |          | Total  |      |          |
|-------|-------|------|----------|-------|------|----------|-------|------|----------|-------|------|----------|-------|------|----------|--------|------|----------|
| Age   | N.    | Mean | St. dev. | N.     | Mean | St. dev. |
| 15-19 | 9378  | 5.89 | 2.51     | 9521  | 5.74 | 2.71     | 11658 | 5.54 | 2.83     | 11352 | 5.63 | 2.72     | 11274 | 5.66 | 2.71     | 257157 | 5.64 | 2.48     |
| 20-24 | 16626 | 5.67 | 2.42     | 13467 | 5.56 | 2.59     | 14462 | 5.44 | 2.69     | 14574 | 5.49 | 2.57     | 14240 | 5.53 | 2.59     | 304503 | 5.48 | 2.36     |
| 25-29 | 17171 | 5.59 | 2.41     | 14211 | 5.56 | 2.55     | 15665 | 5.40 | 2.63     | 15287 | 5.47 | 2.53     | 14890 | 5.54 | 2.51     | 319874 | 5.40 | 2.33     |
| 30-34 | 15490 | 5.66 | 2.39     | 13880 | 5.60 | 2.55     | 14911 | 5.44 | 2.62     | 14883 | 5.54 | 2.52     | 14792 | 5.55 | 2.52     | 298261 | 5.44 | 2.34     |
| 35-39 | 13259 | 5.67 | 2.43     | 12426 | 5.58 | 2.58     | 13369 | 5.36 | 2.64     | 13780 | 5.55 | 2.53     | 13820 | 5.59 | 2.50     | 275000 | 5.44 | 2.35     |
| 40-44 | 11158 | 5.73 | 2.44     | 11317 | 5.60 | 2.58     | 12232 | 5.47 | 2.61     | 12644 | 5.56 | 2.53     | 12539 | 5.56 | 2.51     | 248906 | 5.48 | 2.36     |
| 45-49 | 9318  | 5.77 | 2.42     | 9559  | 5.73 | 2.55     | 10374 | 5.51 | 2.60     | 10975 | 5.63 | 2.51     | 10863 | 5.69 | 2.50     | 220882 | 5.51 | 2.35     |
| 50-54 | 8493  | 5.84 | 2.42     | 9317  | 5.69 | 2.61     | 10105 | 5.55 | 2.61     | 10502 | 5.62 | 2.52     | 10330 | 5.73 | 2.51     | 206373 | 5.53 | 2.39     |
| 55-59 | 6891  | 5.97 | 2.41     | 7549  | 5.82 | 2.56     | 8801  | 5.60 | 2.60     | 9172  | 5.74 | 2.50     | 9029  | 5.89 | 2.48     | 174449 | 5.59 | 2.39     |
| 60-64 | 6258  | 6.06 | 2.43     | 7701  | 5.86 | 2.58     | 9151  | 5.63 | 2.60     | 9256  | 5.68 | 2.57     | 8931  | 5.79 | 2.53     | 164538 | 5.62 | 2.44     |
| 65-69 | 4969  | 6.39 | 2.37     | 5992  | 5.97 | 2.55     | 7952  | 5.76 | 2.57     | 8142  | 5.90 | 2.45     | 8448  | 5.95 | 2.46     | 132981 | 5.73 | 2.43     |
| 70-74 | 4060  | 6.63 | 2.26     | 4909  | 6.10 | 2.51     | 5930  | 5.70 | 2.61     | 6299  | 5.81 | 2.58     | 6311  | 5.98 | 2.51     | 103282 | 5.67 | 2.48     |
| 75-79 | 2047  | 6.62 | 2.28     | 2656  | 6.33 | 2.54     | 3606  | 5.98 | 2.63     | 3917  | 6.02 | 2.55     | 3839  | 6.11 | 2.51     | 63072  | 5.74 | 2.50     |
| 80-84 | 1177  | 6.58 | 2.30     | 1603  | 6.26 | 2.58     | 2258  | 6.00 | 2.69     | 2145  | 5.90 | 2.74     | 2137  | 6.05 | 2.67     | 36385  | 5.74 | 2.58     |

|              |        |      |      |        |      |      |        |      |      |        |      |      |        |      |      |         |      |      |
|--------------|--------|------|------|--------|------|------|--------|------|------|--------|------|------|--------|------|------|---------|------|------|
| <b>85-89</b> | 454    | 6.49 | 2.46 | 614    | 6.16 | 2.65 | 922    | 5.98 | 2.66 | 790    | 5.94 | 2.67 | 853    | 6.22 | 5.89 | 13733   | 5.80 | 2.79 |
| <b>90-94</b> | 117    | 6.43 | 2.42 | 192    | 6.25 | 2.84 | 236    | 6.07 | 2.87 | 179    | 6.31 | 2.83 | 216    | 5.79 | 2.87 | 3335    | 5.74 | 2.71 |
| <b>Total</b> | 126866 | 6.06 | 2.40 | 124914 | 5.86 | 2.60 | 141632 | 5.65 | 2.65 | 143897 | 5.74 | 2.58 | 142512 | 5.79 | 2.77 | 2822731 | 5.60 | 2.45 |

**Tables S3a-k. Regional Cantril Ladder (2006, 2015, and 2024) – participant numbers, means, and standard deviations**

Table S3a. EU Cantril Ladder (2006, 2015, and 2024) – participant numbers, means, and standard deviations

| EU           |       |      |          |       |      |          |       |      |          |       |      |          |
|--------------|-------|------|----------|-------|------|----------|-------|------|----------|-------|------|----------|
| Age          | 2006  |      |          | 2015  |      |          | 2024  |      |          | Total |      |          |
|              | N.    | Mean | St. dev. |
| 15-19        | 1180  | 6.83 | 1.71     | 1024  | 6.86 | 1.67     | 522   | 7.22 | 1.61     | 522   | 6.97 | 1.66     |
| 20-24        | 1909  | 6.63 | 1.76     | 1915  | 6.61 | 1.70     | 1187  | 6.95 | 1.51     | 5011  | 6.73 | 1.66     |
| 25-29        | 1734  | 6.68 | 1.80     | 1830  | 6.52 | 1.72     | 1419  | 6.85 | 1.65     | 4983  | 6.68 | 1.72     |
| 30-34        | 2176  | 6.59 | 1.95     | 2339  | 6.55 | 1.78     | 1838  | 6.92 | 1.61     | 6353  | 6.69 | 1.78     |
| 35-39        | 2379  | 6.71 | 1.87     | 2209  | 6.40 | 1.88     | 2097  | 6.90 | 1.67     | 6685  | 6.67 | 1.81     |
| 40-44        | 2553  | 6.45 | 1.93     | 2484  | 6.46 | 1.83     | 2219  | 6.75 | 1.74     | 7256  | 6.55 | 1.83     |
| 45-49        | 2219  | 6.21 | 2.10     | 2266  | 6.25 | 1.93     | 2310  | 6.81 | 1.76     | 6795  | 6.42 | 1.93     |
| 50-54        | 2368  | 6.04 | 2.15     | 2503  | 6.17 | 2.01     | 2454  | 6.71 | 1.81     | 7325  | 6.31 | 1.99     |
| 55-59        | 2245  | 6.18 | 2.27     | 2511  | 6.17 | 2.04     | 2382  | 6.81 | 1.81     | 7138  | 6.39 | 2.04     |
| 60-64        | 2058  | 6.02 | 2.24     | 2512  | 6.08 | 2.14     | 2318  | 6.66 | 1.92     | 6888  | 6.25 | 2.10     |
| 65-69        | 1667  | 5.97 | 2.32     | 2540  | 6.25 | 2.07     | 2772  | 6.61 | 1.88     | 6979  | 6.28 | 2.09     |
| 70-74        | 1387  | 6.01 | 2.35     | 1747  | 6.07 | 2.13     | 2014  | 6.55 | 1.99     | 5148  | 6.21 | 2.16     |
| 75-79        | 935   | 5.80 | 2.45     | 1141  | 5.64 | 2.25     | 1308  | 6.51 | 2.09     | 3384  | 5.98 | 2.26     |
| 80-84        | 642   | 5.77 | 2.46     | 588   | 5.74 | 2.29     | 719   | 6.38 | 2.21     | 1949  | 5.96 | 2.32     |
| 85-89        | 151   | 6.43 | 2.40     | 249   | 5.70 | 2.43     | 294   | 6.51 | 2.01     | 694   | 6.21 | 2.28     |
| 90-94        | 22    | 6.27 | 2.81     | 55    | 6.15 | 2.36     | 63    | 6.32 | 2.17     | 140   | 6.25 | 2.45     |
| <b>Total</b> | 25625 | 6.29 | 2.16     | 27913 | 6.23 | 2.01     | 25916 | 6.72 | 1.84     | 77250 | 6.41 | 2.01     |

Table S3b. Europe Other Cantril Ladder (2006, 2015, and 2024) – participant numbers, means, and standard deviations

| Europe Other |      |      |          |      |      |          |       |      |          |       |      |          |
|--------------|------|------|----------|------|------|----------|-------|------|----------|-------|------|----------|
| Age          | 2006 |      |          | 2015 |      |          | 2024  |      |          | Total |      |          |
|              | N.   | Mean | St. dev. | N.   | Mean | St. dev. | N.    | Mean | St. dev. | N.    | Mean | St. dev. |
| 15-19        | 596  | 6.16 | 2.13     | 632  | 6.43 | 2.16     | 441   | 7.07 | 2.35     | 1669  | 6.55 | 2.21     |
| 20-24        | 1047 | 5.58 | 2.17     | 772  | 6.19 | 2.15     | 650   | 6.65 | 1.91     | 2469  | 6.14 | 2.08     |
| 25-29        | 928  | 5.59 | 2.20     | 720  | 5.80 | 2.15     | 657   | 6.68 | 1.84     | 2305  | 6.02 | 2.06     |
| 30-34        | 878  | 5.72 | 2.17     | 699  | 5.70 | 2.26     | 741   | 6.63 | 1.96     | 2318  | 6.02 | 2.13     |
| 35-39        | 860  | 5.43 | 2.24     | 753  | 5.80 | 2.34     | 805   | 6.91 | 1.96     | 2418  | 6.05 | 2.18     |
| 40-44        | 916  | 5.29 | 2.31     | 789  | 5.70 | 2.53     | 820   | 6.62 | 1.94     | 2525  | 5.87 | 2.26     |
| 45-49        | 875  | 5.16 | 2.25     | 764  | 5.59 | 2.40     | 824   | 6.56 | 1.91     | 2463  | 5.77 | 2.19     |
| 50-54        | 893  | 5.04 | 2.32     | 803  | 5.40 | 2.56     | 895   | 6.45 | 2.04     | 2591  | 5.63 | 2.31     |
| 55-59        | 663  | 5.17 | 2.40     | 737  | 5.33 | 2.56     | 947   | 6.39 | 2.12     | 2347  | 5.63 | 2.36     |
| 60-64        | 538  | 5.35 | 2.43     | 682  | 5.52 | 2.63     | 897   | 6.18 | 2.13     | 2117  | 5.68 | 2.40     |
| 65-69        | 452  | 5.20 | 2.44     | 607  | 5.68 | 2.61     | 1164  | 6.38 | 2.14     | 2223  | 5.75 | 2.40     |
| 70-74        | 356  | 4.97 | 2.60     | 495  | 5.39 | 2.65     | 780   | 6.10 | 2.22     | 1631  | 5.49 | 2.49     |
| 75-79        | 179  | 5.23 | 2.52     | 340  | 5.68 | 2.35     | 465   | 6.18 | 2.15     | 984   | 5.70 | 2.34     |
| 80-84        | 99   | 5.60 | 2.91     | 158  | 5.75 | 2.82     | 258   | 5.98 | 2.45     | 515   | 5.78 | 2.73     |
| 85-89        | 26   | 5.77 | 3.20     | 68   | 5.96 | 2.85     | 81    | 6.07 | 2.79     | 175   | 5.93 | 2.95     |
| 90-94        | 4    | 6.25 | 2.75     | 9    | 5.33 | 3.04     | 26    | 5.96 | 2.25     | 39    | 5.85 | 2.68     |
| <b>Total</b> | 9310 | 5.47 | 2.44     | 9028 | 5.70 | 2.50     | 10451 | 6.43 | 2.14     | 28789 | 5.87 | 2.36     |

Table S3c. Independent States Cantril Ladder (2006, 2015, and 2024) – participant numbers, means, and standard deviations

| Independent States |      |      |          |      |      |          |      |      |          |       |      |          |
|--------------------|------|------|----------|------|------|----------|------|------|----------|-------|------|----------|
| Age                | 2006 |      |          | 2015 |      |          | 2024 |      |          | Total |      |          |
|                    | N.   | Mean | St. dev. | N.   | Mean | St. dev. | N.   | Mean | St. dev. | N.    | Mean | St. dev. |
| 15-19              | 936  | 5.54 | 1.95     | 1061 | 5.74 | 2.03     | 698  | 6.46 | 2.04     | 2695  | 5.91 | 2.01     |
| 20-24              | 962  | 5.10 | 1.82     | 1369 | 5.67 | 1.98     | 655  | 6.26 | 2.02     | 2986  | 5.68 | 1.94     |
| 25-29              | 948  | 5.13 | 1.87     | 1381 | 5.64 | 2.01     | 800  | 6.00 | 2.05     | 3129  | 5.59 | 1.98     |
| 30-34              | 888  | 4.78 | 1.75     | 1372 | 5.53 | 2.00     | 1026 | 5.97 | 2.05     | 3286  | 5.43 | 1.93     |
| 35-39              | 936  | 4.81 | 1.92     | 1163 | 5.53 | 2.00     | 1100 | 5.89 | 2.04     | 3199  | 5.41 | 1.99     |

|              |              |             |             |              |             |             |             |             |             |              |             |             |
|--------------|--------------|-------------|-------------|--------------|-------------|-------------|-------------|-------------|-------------|--------------|-------------|-------------|
| 40-44        | 948          | 4.73        | 1.82        | 1126         | 5.30        | 2.00        | 982         | 5.78        | 2.07        | 3056         | 5.27        | 1.96        |
| 45-49        | 956          | 4.71        | 1.90        | 1042         | 5.33        | 1.96        | 851         | 5.59        | 2.05        | 2849         | 5.21        | 1.97        |
| 50-54        | 838          | 4.61        | 2.03        | 1076         | 5.06        | 2.00        | 757         | 5.58        | 2.18        | 2671         | 5.08        | 2.07        |
| 55-59        | 628          | 4.60        | 1.98        | 934          | 4.96        | 2.16        | 702         | 5.61        | 2.28        | 2264         | 5.06        | 2.14        |
| 60-64        | 398          | 4.69        | 2.16        | 860          | 4.88        | 2.20        | 795         | 5.40        | 2.24        | 2053         | 4.99        | 2.20        |
| 65-69        | 650          | 4.29        | 2.01        | 605          | 4.78        | 2.20        | 657         | 5.23        | 2.22        | 1912         | 4.77        | 2.14        |
| 70-74        | 431          | 4.37        | 2.12        | 309          | 4.38        | 2.23        | 479         | 5.25        | 2.32        | 1219         | 4.67        | 2.22        |
| 75-79        | 351          | 4.21        | 2.10        | 351          | 4.48        | 2.48        | 238         | 5.25        | 2.41        | 940          | 4.65        | 2.33        |
| 80-84        | 136          | 3.92        | 2.20        | 144          | 4.58        | 2.64        | 105         | 4.70        | 2.46        | 385          | 4.40        | 2.43        |
| 85-89        | 34           | 4.61        | 2.45        | 57           | 3.92        | 2.46        | 53          | 5.51        | 2.73        | 144          | 4.68        | 2.55        |
| 90-94        | 5            | 3.40        | 1.95        | 14           | 4.57        | 1.82        | 7           | 7.43        | 2.22        | 26           | 5.13        | 2.00        |
| <b>Total</b> | <b>10045</b> | <b>4.59</b> | <b>2.00</b> | <b>12864</b> | <b>5.02</b> | <b>2.14</b> | <b>9905</b> | <b>5.74</b> | <b>2.21</b> | <b>32814</b> | <b>5.12</b> | <b>2.12</b> |

Table S3d. Australia / New Zealand Cantril Ladder (2006, 2015, and 2024) – participant numbers, means, and standard deviations

| Australia / New Zealand |      |      |          |      |      |          |      |      |          |       |      |          |
|-------------------------|------|------|----------|------|------|----------|------|------|----------|-------|------|----------|
|                         | 2006 |      |          | 2015 |      |          | 2024 |      |          | Total |      |          |
| Age                     | N.   | Mean | St. dev. | N.   | Mean | St. dev. | N.   | Mean | St. dev. | N.    | Mean | St. dev. |
| 15-19                   | 260  | 7.43 | 1.48     | 87   | 7.74 | 1.64     | 641  | 6.18 | 2.31     | 988   | 7.12 | 1.81     |
| 20-24                   | 119  | 7.15 | 1.46     | 45   | 7.71 | 1.66     | 857  | 5.75 | 2.34     | 1021  | 6.87 | 1.82     |
| 25-29                   | 141  | 7.29 | 1.25     | 37   | 7.30 | 1.56     | 943  | 5.75 | 2.28     | 1121  | 6.78 | 1.70     |
| 30-34                   | 179  | 7.46 | 1.44     | 43   | 6.63 | 1.57     | 1031 | 5.67 | 2.32     | 1253  | 6.59 | 1.78     |
| 35-39                   | 222  | 7.34 | 1.55     | 79   | 7.10 | 1.83     | 929  | 5.58 | 2.40     | 1230  | 6.67 | 1.93     |
| 40-44                   | 172  | 7.24 | 1.45     | 115  | 7.41 | 1.61     | 819  | 5.65 | 2.40     | 1106  | 6.77 | 1.82     |
| 45-49                   | 158  | 7.35 | 1.42     | 143  | 7.45 | 1.32     | 755  | 5.54 | 2.52     | 1056  | 6.78 | 1.75     |
| 50-54                   | 166  | 7.50 | 1.57     | 181  | 7.22 | 1.58     | 761  | 5.65 | 2.51     | 1108  | 6.79 | 1.89     |
| 55-59                   | 178  | 7.63 | 1.53     | 212  | 7.26 | 1.47     | 602  | 5.54 | 2.51     | 992   | 6.81 | 1.84     |
| 60-64                   | 132  | 7.48 | 2.13     | 235  | 7.41 | 1.63     | 588  | 5.39 | 2.57     | 955   | 6.76 | 2.11     |
| 65-69                   | 105  | 7.90 | 1.58     | 261  | 7.65 | 1.55     | 458  | 5.29 | 2.67     | 824   | 6.95 | 1.93     |
| 70-74                   | 67   | 7.42 | 1.96     | 173  | 7.83 | 1.61     | 295  | 5.72 | 2.61     | 535   | 6.99 | 2.06     |
| 75-79                   | 60   | 7.80 | 1.79     | 157  | 7.69 | 1.65     | 156  | 5.93 | 2.81     | 373   | 7.14 | 2.08     |
| 80-84                   | 32   | 6.93 | 1.68     | 116  | 7.65 | 1.67     | 60   | 6.13 | 3.03     | 208   | 6.90 | 2.13     |
| 85-89                   | 8    | 8.25 | 1.83     | 87   | 7.34 | 1.77     | 26   | 6.27 | 2.27     | 121   | 7.29 | 1.96     |

|              |      |       |      |      |      |      |      |      |      |       |      |      |
|--------------|------|-------|------|------|------|------|------|------|------|-------|------|------|
| <b>90-94</b> | 1    | 10.00 |      | 15   | 7.00 | 2.24 | 4    | 6.75 | 3.59 | 20    | 7.92 | 2.92 |
| <b>Total</b> | 2000 | 7.64  | 1.61 | 1986 | 7.40 | 1.65 | 8925 | 5.80 | 2.57 | 12911 | 6.94 | 1.94 |

Table S3e. South East Asia Cantril Ladder (2006, 2015, and 2024) – participant numbers, means, and standard deviations

| South East Asia |      |      |          |      |      |          |      |      |          |       |      |          |
|-----------------|------|------|----------|------|------|----------|------|------|----------|-------|------|----------|
| Age             | 2006 |      |          | 2015 |      |          | 2024 |      |          | Total |      |          |
|                 | N.   | Mean | St. dev. | N.   | Mean | St. dev. | N.   | Mean | St. dev. | N.    | Mean | St. dev. |
| 15-19           | 790  | 5.54 | 1.76     | 633  | 5.81 | 2.12     | 641  | 6.18 | 2.30     | 2064  | 5.84 | 2.06     |
| 20-24           | 1080 | 5.39 | 1.77     | 714  | 5.51 | 2.24     | 857  | 5.75 | 2.34     | 2651  | 5.55 | 2.12     |
| 25-29           | 1115 | 5.30 | 1.75     | 827  | 5.42 | 2.14     | 943  | 5.75 | 2.28     | 2885  | 5.49 | 2.06     |
| 30-34           | 1042 | 5.32 | 1.90     | 865  | 5.17 | 2.17     | 1031 | 5.68 | 2.32     | 2938  | 5.39 | 2.13     |
| 35-39           | 1054 | 5.35 | 1.79     | 900  | 5.31 | 2.21     | 929  | 5.58 | 2.40     | 2883  | 5.41 | 2.13     |
| 40-44           | 955  | 5.34 | 1.83     | 756  | 5.28 | 2.23     | 819  | 5.65 | 2.40     | 2530  | 5.42 | 2.15     |
| 45-49           | 815  | 5.23 | 1.81     | 733  | 5.27 | 2.10     | 755  | 5.54 | 2.52     | 2303  | 5.35 | 2.14     |
| 50-54           | 661  | 5.27 | 1.80     | 647  | 5.22 | 2.16     | 761  | 5.65 | 2.51     | 2069  | 5.38 | 2.16     |
| 55-59           | 425  | 5.17 | 1.79     | 602  | 5.10 | 2.90     | 602  | 5.54 | 2.51     | 1629  | 5.27 | 2.40     |
| 60-64           | 332  | 5.07 | 1.78     | 492  | 5.22 | 2.19     | 588  | 5.39 | 2.58     | 1412  | 5.23 | 2.18     |
| 65-69           | 191  | 5.11 | 2.12     | 321  | 5.39 | 2.20     | 458  | 5.29 | 2.56     | 970   | 5.26 | 2.29     |
| 70-74           | 151  | 5.28 | 2.14     | 211  | 5.07 | 2.38     | 295  | 5.72 | 2.61     | 657   | 5.36 | 2.38     |
| 75-79           | 75   | 4.92 | 2.32     | 128  | 5.34 | 2.56     | 156  | 5.93 | 2.81     | 359   | 5.40 | 2.56     |
| 80-84           | 42   | 5.29 | 2.24     | 44   | 5.91 | 2.20     | 60   | 6.13 | 3.03     | 146   | 5.78 | 2.49     |
| 85-89           | 10   | 4.70 | 2.11     | 27   | 6.19 | 2.79     | 26   | 6.27 | 2.27     | 63    | 5.72 | 2.39     |
| 90-94           | 2    | 3.50 | 0.71     | 3    | 5.67 | 0.57     | 4    | 6.75 | 3.59     | 9     | 5.31 | 1.62     |
| <b>Total</b>    | 8740 | 5.11 | 1.85     | 7903 | 5.43 | 2.20     | 8925 | 5.80 | 2.56     | 25568 | 5.45 | 2.20     |

Table S3f. South Asia Cantril Ladder (2006, 2015, and 2024) – participant numbers, means, and standard deviations

| South Asia |      |      |          |      |      |          |      |      |          |       |      |          |
|------------|------|------|----------|------|------|----------|------|------|----------|-------|------|----------|
| Age        | 2006 |      |          | 2015 |      |          | 2024 |      |          | Total |      |          |
|            | N.   | Mean | St. dev. | N.   | Mean | St. dev. | N.   | Mean | St. dev. | N.    | Mean | St. dev. |
| 15-19      | 613  | 5.19 | 1.98     | 975  | 4.89 | 2.09     | 687  | 4.81 | 2.67     | 2275  | 4.96 | 2.25     |

|              |             |             |             |             |             |             |             |             |             |              |             |             |
|--------------|-------------|-------------|-------------|-------------|-------------|-------------|-------------|-------------|-------------|--------------|-------------|-------------|
| 20-24        | 827         | 5.18        | 2.03        | 1074        | 4.62        | 2.10        | 793         | 4.92        | 2.70        | 2694         | 4.91        | 2.28        |
| 25-29        | 829         | 5.04        | 2.06        | 1126        | 4.70        | 2.04        | 846         | 4.60        | 2.62        | 2801         | 4.78        | 2.24        |
| 30-34        | 783         | 5.01        | 2.00        | 1136        | 4.63        | 2.12        | 834         | 4.62        | 2.52        | 2753         | 4.75        | 2.21        |
| 35-39        | 688         | 5.01        | 2.14        | 1010        | 4.47        | 2.12        | 785         | 4.48        | 2.63        | 2483         | 4.65        | 2.30        |
| 40-44        | 605         | 5.01        | 2.10        | 818         | 4.50        | 2.06        | 641         | 4.58        | 2.55        | 2064         | 4.70        | 2.24        |
| 45-49        | 465         | 4.95        | 2.01        | 713         | 4.37        | 2.12        | 539         | 4.58        | 2.55        | 1717         | 4.63        | 2.23        |
| 50-54        | 325         | 4.85        | 2.20        | 548         | 4.23        | 2.18        | 463         | 4.42        | 2.70        | 1336         | 4.50        | 2.36        |
| 55-59        | 273         | 4.99        | 2.07        | 459         | 4.59        | 2.12        | 350         | 4.61        | 2.72        | 1082         | 4.73        | 2.30        |
| 60-64        | 211         | 5.19        | 2.31        | 440         | 4.40        | 2.16        | 358         | 4.26        | 2.81        | 1009         | 4.62        | 2.43        |
| 65-69        | 149         | 5.07        | 2.07        | 279         | 4.31        | 2.36        | 257         | 4.36        | 2.80        | 685          | 4.58        | 2.41        |
| 70-74        | 112         | 4.72        | 2.18        | 232         | 4.35        | 2.12        | 188         | 4.52        | 2.89        | 532          | 4.53        | 2.40        |
| 75-79        | 58          | 4.84        | 2.15        | 88          | 5.00        | 2.53        | 96          | 4.43        | 2.79        | 242          | 4.76        | 2.49        |
| 80-84        | 24          | 5.54        | 2.02        | 50          | 4.48        | 2.63        | 55          | 4.62        | 3.11        | 129          | 4.88        | 2.59        |
| 85-89        | 11          | 4.81        | 1.72        | 15          | 5.13        | 2.20        | 10          | 4.40        | 2.76        | 36           | 4.78        | 2.23        |
| 90-94        | 1           | 5.00        |             | 7           | 2.71        | 3.54        | 4           | 3.50        | 2.38        | 12           | 3.74        | 2.96        |
| <b>Total</b> | <b>5974</b> | <b>5.03</b> | <b>2.07</b> | <b>8970</b> | <b>4.46</b> | <b>2.28</b> | <b>6906</b> | <b>4.48</b> | <b>2.70</b> | <b>21850</b> | <b>4.66</b> | <b>2.35</b> |

Table S3g. East Asia Cantril Ladder (2006, 2015, and 2024) – participant numbers, means, and standard deviations

| East Asia |      |      |          |      |      |          |      |      |          |       |      |          |
|-----------|------|------|----------|------|------|----------|------|------|----------|-------|------|----------|
| Age       | 2006 |      |          | 2015 |      |          | 2024 |      |          | Total |      |          |
|           | N.   | Mean | St. dev. | N.   | Mean | St. dev. | N.   | Mean | St. dev. | N.    | Mean | St. dev. |
| 15-19     | 513  | 6.19 | 1.81     | 414  | 6.09 | 2.02     | 266  | 6.19 | 2.17     | 1193  | 6.16 | 2.00     |
| 20-24     | 692  | 5.79 | 1.88     | 541  | 5.89 | 1.81     | 438  | 6.00 | 1.98     | 1671  | 5.89 | 1.89     |
| 25-29     | 640  | 5.60 | 1.86     | 641  | 5.59 | 1.95     | 465  | 6.21 | 1.96     | 1746  | 5.80 | 1.92     |
| 30-34     | 752  | 5.49 | 1.96     | 631  | 5.44 | 1.90     | 472  | 6.17 | 1.97     | 1855  | 5.70 | 1.94     |
| 35-39     | 839  | 5.29 | 2.04     | 592  | 5.42 | 2.05     | 507  | 6.10 | 1.83     | 1938  | 5.60 | 1.97     |
| 40-44     | 828  | 5.30 | 2.01     | 748  | 5.43 | 1.95     | 475  | 6.14 | 2.02     | 2051  | 5.62 | 1.99     |
| 45-49     | 708  | 5.12 | 2.11     | 795  | 5.41 | 2.12     | 486  | 6.21 | 2.03     | 1989  | 5.58 | 2.09     |
| 50-54     | 726  | 5.12 | 2.11     | 878  | 5.25 | 2.18     | 550  | 6.15 | 2.09     | 2154  | 5.51 | 2.13     |
| 55-59     | 558  | 5.28 | 2.15     | 651  | 5.40 | 2.12     | 509  | 5.87 | 2.24     | 1718  | 5.52 | 2.17     |
| 60-64     | 451  | 5.22 | 2.14     | 747  | 5.41 | 2.15     | 505  | 6.03 | 2.19     | 1703  | 5.55 | 2.16     |
| 65-69     | 343  | 5.24 | 2.20     | 573  | 5.42 | 2.18     | 406  | 6.01 | 2.22     | 1322  | 5.56 | 2.20     |
| 70-74     | 299  | 5.38 | 2.40     | 427  | 5.63 | 2.14     | 357  | 6.05 | 2.09     | 1083  | 5.69 | 2.21     |

|              |      |      |      |      |      |      |      |      |      |       |      |      |
|--------------|------|------|------|------|------|------|------|------|------|-------|------|------|
| 75-79        | 130  | 5.55 | 2.08 | 282  | 5.71 | 2.40 | 266  | 5.95 | 2.28 | 678   | 5.74 | 2.25 |
| 80-84        | 74   | 5.55 | 2.35 | 173  | 5.54 | 2.39 | 179  | 5.92 | 2.53 | 426   | 5.67 | 2.42 |
| 85-89        | 12   | 6.33 | 1.37 | 51   | 5.37 | 2.53 | 82   | 5.96 | 2.38 | 145   | 5.89 | 2.09 |
| 90-94        | 1    | 8.00 |      | 14   | 5.36 | 2.87 | 29   | 6.24 | 3.04 | 44    | 6.53 | 2.96 |
| <b>Total</b> | 7566 | 5.65 | 2.03 | 8158 | 5.52 | 2.17 | 5992 | 6.08 | 2.19 | 21716 | 5.75 | 2.13 |

Table S3h. Latin America Cantril Ladder (2006, 2015, and 2024) – participant numbers, means, and standard deviations

| Latin America |       |      |          |       |      |          |       |      |          |       |      |          |
|---------------|-------|------|----------|-------|------|----------|-------|------|----------|-------|------|----------|
| Age           | 2006  |      |          | 2015  |      |          | 2024  |      |          | Total |      |          |
|               | N.    | Mean | St. dev. |
| 15-19         | 2599  | 6.42 | 2.31     | 1808  | 6.66 | 2.40     | 1426  | 7.10 | 2.16     | 5833  | 6.73 | 2.29     |
| 20-24         | 2385  | 6.08 | 2.29     | 1969  | 6.25 | 2.39     | 1788  | 6.77 | 2.15     | 6142  | 6.37 | 2.28     |
| 25-29         | 2288  | 5.91 | 2.31     | 1911  | 6.09 | 2.39     | 1853  | 6.55 | 2.20     | 6052  | 6.18 | 2.30     |
| 30-34         | 2105  | 5.75 | 2.37     | 1853  | 5.95 | 2.43     | 1838  | 6.41 | 2.24     | 5796  | 6.04 | 2.35     |
| 35-39         | 2029  | 5.72 | 2.41     | 1748  | 5.90 | 2.51     | 1706  | 6.19 | 2.31     | 5483  | 5.94 | 2.41     |
| 40-44         | 1857  | 5.64 | 2.38     | 1518  | 5.73 | 2.52     | 1670  | 6.11 | 2.45     | 5045  | 5.83 | 2.45     |
| 45-49         | 1584  | 5.46 | 2.32     | 1329  | 5.82 | 2.52     | 1494  | 6.10 | 2.51     | 4407  | 5.79 | 2.45     |
| 50-54         | 1444  | 5.53 | 2.53     | 1422  | 5.66 | 2.64     | 1373  | 6.04 | 2.62     | 4239  | 5.74 | 2.60     |
| 55-59         | 1222  | 5.51 | 2.59     | 1142  | 5.85 | 2.74     | 1295  | 6.01 | 2.70     | 3659  | 5.79 | 2.68     |
| 60-64         | 1182  | 5.41 | 2.58     | 1048  | 5.52 | 2.76     | 1342  | 5.98 | 2.81     | 3572  | 5.64 | 2.72     |
| 65-69         | 807   | 5.59 | 2.56     | 911   | 5.52 | 2.78     | 1144  | 5.99 | 2.83     | 954   | 5.70 | 2.72     |
| 70-74         | 640   | 5.48 | 2.67     | 697   | 5.75 | 2.79     | 929   | 6.10 | 2.86     | 2266  | 5.78 | 2.77     |
| 75-79         | 400   | 5.57 | 2.64     | 488   | 5.70 | 2.80     | 590   | 6.26 | 2.90     | 1478  | 5.84 | 2.78     |
| 80-84         | 236   | 5.53 | 2.84     | 264   | 5.67 | 2.97     | 339   | 6.34 | 3.17     | 839   | 5.85 | 2.99     |
| 85-89         | 81    | 5.48 | 2.55     | 130   | 5.55 | 3.37     | 127   | 6.48 | 3.14     | 338   | 5.84 | 3.02     |
| 90-94         | 27    | 5.70 | 2.55     | 20    | 5.10 | 3.32     | 27    | 6.33 | 3.43     | 74    | 5.71 | 3.10     |
| <b>Total</b>  | 20886 | 5.67 | 2.49     | 18258 | 5.80 | 2.71     | 18941 | 6.30 | 2.66     | 56177 | 5.92 | 2.62     |

Table S3i. North America Cantril Ladder (2006, 2015, and 2024) – participant numbers, means, and standard deviations

| N America |  |  |  |  |  |  |  |  |  |  |  |  |
|-----------|--|--|--|--|--|--|--|--|--|--|--|--|
|-----------|--|--|--|--|--|--|--|--|--|--|--|--|

| Age          | 2006 |      |          | 2015 |      |          | 2024 |      |          | Total |      |          |
|--------------|------|------|----------|------|------|----------|------|------|----------|-------|------|----------|
|              | N.   | Mean | St. dev. | N.   | Mean | St. dev. | N.   | Mean | St. dev. | N.    | Mean | St. dev. |
| 15-19        | 96   | 7.63 | 1.75     | 76   | 7.38 | 1.59     | 74   | 7.59 | 1.56     | 246   | 7.53 | 1.63     |
| 20-24        | 125  | 7.26 | 1.37     | 90   | 7.18 | 1.84     | 116  | 6.24 | 1.60     | 331   | 6.89 | 1.60     |
| 25-29        | 158  | 7.28 | 1.41     | 99   | 6.91 | 1.64     | 133  | 6.47 | 1.55     | 390   | 6.89 | 1.53     |
| 30-34        | 172  | 7.13 | 1.78     | 120  | 7.00 | 1.65     | 136  | 6.60 | 1.49     | 428   | 6.91 | 1.64     |
| 35-39        | 214  | 7.14 | 1.56     | 135  | 6.93 | 1.76     | 137  | 6.66 | 1.72     | 486   | 6.91 | 1.68     |
| 40-44        | 272  | 7.04 | 1.76     | 132  | 7.20 | 1.91     | 145  | 6.44 | 1.80     | 549   | 6.89 | 1.82     |
| 45-49        | 242  | 7.26 | 1.77     | 154  | 6.94 | 1.87     | 102  | 6.62 | 2.01     | 498   | 6.94 | 1.88     |
| 50-54        | 243  | 7.29 | 1.54     | 187  | 7.48 | 1.57     | 134  | 6.58 | 1.68     | 564   | 7.12 | 1.60     |
| 55-59        | 206  | 7.30 | 1.81     | 222  | 7.13 | 1.83     | 161  | 6.93 | 1.94     | 589   | 7.12 | 1.86     |
| 60-64        | 206  | 7.83 | 1.66     | 209  | 7.12 | 1.89     | 215  | 6.90 | 1.91     | 630   | 7.28 | 1.82     |
| 65-69        | 124  | 7.66 | 1.70     | 220  | 7.33 | 1.91     | 191  | 7.46 | 1.65     | 535   | 7.48 | 1.75     |
| 70-74        | 81   | 7.69 | 2.21     | 145  | 7.39 | 1.97     | 183  | 7.59 | 1.54     | 409   | 7.56 | 1.91     |
| 75-79        | 80   | 7.37 | 2.09     | 91   | 7.63 | 2.19     | 129  | 7.72 | 1.55     | 300   | 7.57 | 1.94     |
| 80-84        | 63   | 7.60 | 2.07     | 52   | 7.19 | 2.04     | 82   | 7.62 | 1.80     | 197   | 7.47 | 1.97     |
| 85-89        | 22   | 7.45 | 2.10     | 34   | 7.59 | 1.69     | 36   | 7.22 | 1.62     | 92    | 7.42 | 1.80     |
| 90-94        | 1    | 6.00 |          | 12   | 8.00 | 2.26     | 5    | 7.60 | 1.14     | 18    | 7.20 | 1.70     |
| <b>Total</b> | 2305 | 7.31 | 1.77     | 1978 | 7.28 | 1.85     | 1979 | 7.02 | 1.66     | 6262  | 7.20 | 1.76     |

Table S3j. Middle East and North Africa Cantril Ladder (2006, 2015, and 2024) – participant numbers, means, and standard deviations

| Middle East and North Africa |      |      |          |      |      |          |      |      |          |       |      |          |
|------------------------------|------|------|----------|------|------|----------|------|------|----------|-------|------|----------|
| Age                          | 2006 |      |          | 2015 |      |          | 2024 |      |          | Total |      |          |
|                              | N.   | Mean | St. dev. | N.   | Mean | St. dev. | N.   | Mean | St. dev. | N.    | Mean | St. dev. |
| 15-19                        | 996  | 5.82 | 2.27     | 1618 | 5.57 | 2.57     | 1489 | 5.54 | 2.53     | 4103  | 5.64 | 2.46     |
| 20-24                        | 1946 | 5.81 | 2.31     | 2186 | 5.56 | 2.46     | 1948 | 5.65 | 2.50     | 6080  | 5.67 | 2.42     |
| 25-29                        | 1917 | 5.75 | 2.19     | 2571 | 5.56 | 2.48     | 2368 | 5.78 | 2.40     | 6856  | 5.70 | 2.36     |
| 30-34                        | 1635 | 5.82 | 2.20     | 2491 | 5.42 | 2.51     | 2354 | 5.50 | 2.54     | 6480  | 5.58 | 2.42     |
| 35-39                        | 1283 | 5.75 | 2.20     | 2165 | 5.24 | 2.54     | 2082 | 5.45 | 2.49     | 5530  | 5.48 | 2.41     |
| 40-44                        | 1034 | 5.73 | 2.18     | 1863 | 5.31 | 2.53     | 1740 | 5.22 | 2.50     | 4637  | 5.42 | 2.40     |
| 45-49                        | 774  | 5.74 | 2.26     | 1407 | 5.25 | 2.54     | 1253 | 5.23 | 2.55     | 3434  | 5.41 | 2.45     |
| 50-54                        | 568  | 5.48 | 2.32     | 1217 | 5.27 | 2.56     | 1074 | 5.09 | 2.52     | 2859  | 5.28 | 2.47     |
| 55-59                        | 366  | 5.47 | 2.42     | 773  | 5.34 | 2.48     | 800  | 5.08 | 2.60     | 1939  | 5.30 | 2.50     |

|              |       |      |      |       |      |      |       |      |      |       |      |      |
|--------------|-------|------|------|-------|------|------|-------|------|------|-------|------|------|
| <b>60-64</b> | 271   | 5.52 | 2.46 | 701   | 5.08 | 2.72 | 673   | 5.00 | 2.52 | 1645  | 5.20 | 2.57 |
| <b>65-69</b> | 181   | 5.74 | 2.36 | 373   | 5.28 | 2.35 | 444   | 4.86 | 2.55 | 998   | 5.29 | 2.42 |
| <b>70-74</b> | 105   | 5.01 | 2.73 | 234   | 5.01 | 2.77 | 355   | 4.91 | 2.60 | 694   | 4.98 | 2.70 |
| <b>75-79</b> | 45    | 5.56 | 2.08 | 118   | 5.20 | 2.57 | 185   | 5.26 | 2.59 | 348   | 5.34 | 2.41 |
| <b>80-84</b> | 25    | 5.24 | 2.69 | 67    | 4.54 | 2.20 | 97    | 5.08 | 2.62 | 189   | 4.95 | 2.50 |
| <b>85-89</b> | 5     | 4.20 | 3.11 | 15    | 3.27 | 2.96 | 28    | 4.89 | 2.51 | 48    | 4.12 | 2.86 |
| <b>90-94</b> | 3     | 4.00 | 4.00 | 2     | 4.00 | 2.83 | 7     | 6.71 | 3.15 | 12    | 4.90 | 3.33 |
| <b>Total</b> | 11154 | 5.42 | 2.49 | 17801 | 5.06 | 2.57 | 16897 | 5.33 | 2.57 | 45852 | 5.27 | 2.54 |

Table S3k. Sub-Saharan Africa Cantril Ladder (2006, 2015, and 2024) – participant numbers, means, and standard deviations

| Sub-Saharan Africa |       |      |          |       |      |          |       |      |          |       |      |          |
|--------------------|-------|------|----------|-------|------|----------|-------|------|----------|-------|------|----------|
| Age                | 2006  |      |          | 2015  |      |          | 2024  |      |          | Total |      |          |
|                    | N.    | Mean | St. dev. |
| <b>15-19</b>       | 3333  | 4.28 | 1.90     | 4885  | 4.55 | 2.39     | 4959  | 4.86 | 2.88     | 13177 | 4.56 | 2.39     |
| <b>20-24</b>       | 3735  | 4.23 | 1.84     | 4807  | 4.47 | 2.36     | 5695  | 4.58 | 2.74     | 14237 | 4.43 | 2.31     |
| <b>25-29</b>       | 3784  | 4.25 | 1.78     | 5171  | 4.42 | 2.31     | 5291  | 4.52 | 2.64     | 14246 | 4.40 | 2.24     |
| <b>30-34</b>       | 2711  | 4.17 | 1.85     | 3998  | 4.37 | 2.32     | 4414  | 4.40 | 2.66     | 11123 | 4.31 | 2.28     |
| <b>35-39</b>       | 2304  | 4.17 | 1.79     | 3313  | 4.33 | 2.30     | 3569  | 4.38 | 2.70     | 9186  | 4.29 | 2.26     |
| <b>40-44</b>       | 1733  | 4.11 | 1.77     | 2305  | 4.15 | 2.36     | 2904  | 4.17 | 2.68     | 6942  | 4.14 | 2.27     |
| <b>45-49</b>       | 1329  | 4.16 | 1.84     | 1902  | 4.07 | 2.25     | 2119  | 4.22 | 2.71     | 5350  | 4.15 | 2.27     |
| <b>50-54</b>       | 1001  | 4.02 | 1.85     | 1540  | 4.13 | 2.33     | 1689  | 4.24 | 2.87     | 4230  | 4.13 | 2.35     |
| <b>55-59</b>       | 699   | 4.07 | 1.81     | 1094  | 3.91 | 2.36     | 1104  | 4.36 | 2.78     | 2897  | 4.11 | 2.32     |
| <b>60-64</b>       | 580   | 4.00 | 1.89     | 986   | 3.98 | 2.38     | 1075  | 4.34 | 2.92     | 2641  | 4.11 | 2.40     |
| <b>65-69</b>       | 371   | 4.14 | 1.87     | 624   | 3.82 | 2.46     | 784   | 4.37 | 2.95     | 1779  | 4.11 | 2.43     |
| <b>70-74</b>       | 316   | 3.97 | 1.77     | 440   | 3.92 | 2.44     | 555   | 4.42 | 3.09     | 1311  | 4.10 | 2.43     |
| <b>75-79</b>       | 170   | 4.11 | 2.12     | 243   | 3.65 | 2.42     | 266   | 4.33 | 3.07     | 679   | 4.03 | 2.54     |
| <b>80-84</b>       | 93    | 3.77 | 2.04     | 161   | 3.86 | 2.72     | 157   | 4.38 | 3.10     | 411   | 4.00 | 2.62     |
| <b>85-89</b>       | 28    | 4.25 | 2.25     | 68    | 3.22 | 2.52     | 62    | 4.13 | 3.02     | 158   | 3.87 | 2.60     |
| <b>90-94</b>       | 10    | 3.50 | 1.58     | 25    | 3.24 | 2.35     | 29    | 2.24 | 20.60    | 64    | 2.99 | 8.18     |
| <b>Total</b>       | 22197 | 4.08 | 1.87     | 31562 | 4.01 | 2.39     | 34672 | 4.25 | 3.96     | 88431 | 4.11 | 2.74     |

**Table S4. Global Positive Experiences Index (2006-2024) -- participant numbers, means, and standard deviations**

| Age          | 2006   |       |          | 2007   |       |          | 2008   |       |          | 2009   |       |          | 2010   |       |          | 2011   |       |          | 2012   |       |          |
|--------------|--------|-------|----------|--------|-------|----------|--------|-------|----------|--------|-------|----------|--------|-------|----------|--------|-------|----------|--------|-------|----------|
|              | N.     | Mean  | St. dev. |
| 15-19        | 11981  | 74.14 | 27.37    | 11141  | 73.21 | 28.33    | 13276  | 73.69 | 28.44    | 15004  | 75.70 | 26.05    | 12777  | 77.02 | 25.35    | 19089  | 75.40 | 26.08    | 21124  | 74.74 | 26.16    |
| 20-24        | 14904  | 70.03 | 28.97    | 11942  | 69.67 | 29.10    | 14067  | 70.19 | 29.57    | 16682  | 71.81 | 27.19    | 13919  | 72.60 | 27.23    | 21136  | 71.55 | 27.54    | 22973  | 71.13 | 27.65    |
| 25-29        | 14516  | 68.79 | 29.54    | 11816  | 69.21 | 29.40    | 14198  | 68.95 | 29.64    | 16959  | 69.90 | 28.06    | 14089  | 70.57 | 27.81    | 21831  | 69.38 | 28.25    | 24323  | 69.02 | 28.26    |
| 30-34        | 13323  | 68.20 | 29.22    | 10775  | 68.14 | 29.63    | 12433  | 68.29 | 29.99    | 14813  | 68.96 | 28.47    | 12803  | 69.84 | 27.73    | 19447  | 68.59 | 28.40    | 23144  | 67.79 | 28.44    |
| 35-39        | 12798  | 67.80 | 29.17    | 10418  | 67.93 | 29.78    | 12338  | 67.44 | 30.31    | 13815  | 67.57 | 28.81    | 12645  | 68.32 | 28.37    | 18269  | 67.81 | 28.70    | 21652  | 67.36 | 28.72    |
| 40-44        | 11838  | 67.05 | 29.52    | 9189   | 67.12 | 30.02    | 11213  | 67.15 | 30.36    | 12390  | 67.20 | 29.04    | 11634  | 67.65 | 28.80    | 17127  | 66.99 | 28.96    | 20556  | 67.30 | 28.73    |
| 45-49        | 10131  | 65.82 | 30.17    | 8103   | 65.95 | 30.24    | 9849   | 67.11 | 30.25    | 10795  | 66.39 | 29.05    | 10932  | 66.70 | 29.32    | 15670  | 66.64 | 29.22    | 18737  | 66.96 | 28.81    |
| 50-54        | 9251   | 65.50 | 30.17    | 7164   | 65.81 | 30.01    | 8704   | 66.39 | 30.01    | 9186   | 64.82 | 29.89    | 9953   | 66.49 | 29.17    | 13898  | 65.67 | 29.42    | 17400  | 66.24 | 29.03    |
| 55-59        | 7489   | 66.94 | 29.32    | 5725   | 66.21 | 29.72    | 7108   | 67.56 | 29.43    | 7491   | 64.97 | 29.78    | 8422   | 65.80 | 29.22    | 11653  | 65.60 | 29.35    | 14472  | 66.49 | 28.76    |
| 60-64        | 6416   | 66.57 | 29.53    | 4898   | 67.53 | 29.50    | 6127   | 68.00 | 29.35    | 6564   | 65.23 | 29.73    | 7404   | 66.94 | 28.89    | 11240  | 67.24 | 28.63    | 14104  | 67.38 | 28.74    |
| 65-69        | 5100   | 65.29 | 29.68    | 4102   | 64.51 | 30.65    | 4883   | 67.48 | 29.32    | 5066   | 63.99 | 29.89    | 5574   | 65.60 | 29.49    | 7627   | 66.85 | 29.18    | 9937   | 68.27 | 28.68    |
| 70-74        | 3994   | 64.19 | 29.70    | 3116   | 64.31 | 30.21    | 3800   | 66.24 | 29.75    | 4078   | 60.97 | 30.44    | 4674   | 63.12 | 30.16    | 6551   | 64.95 | 29.54    | 8572   | 67.08 | 28.83    |
| 75-79        | 2538   | 63.55 | 30.62    | 1983   | 63.58 | 29.83    | 2340   | 66.32 | 29.15    | 2345   | 59.38 | 30.63    | 2869   | 63.21 | 29.56    | 4002   | 64.18 | 29.35    | 5309   | 66.22 | 28.58    |
| 80-84        | 1510   | 62.24 | 30.63    | 953    | 63.03 | 30.56    | 1269   | 64.78 | 29.26    | 1373   | 60.51 | 30.37    | 1637   | 61.59 | 29.42    | 2429   | 64.41 | 29.30    | 3124   | 65.76 | 28.55    |
| 85-89        | 400    | 65.03 | 29.75    | 359    | 65.29 | 28.83    | 487    | 66.28 | 29.94    | 420    | 60.81 | 30.35    | 581    | 62.00 | 29.48    | 940    | 63.93 | 28.83    | 1201   | 65.00 | 28.72    |
| 90-94        | 83     | 65.30 | 31.09    | 51     | 63.14 | 26.04    | 90     | 68.89 | 28.77    | 83     | 65.30 | 28.84    | 143    | 63.50 | 31.34    | 227    | 59.74 | 29.36    | 324    | 62.59 | 29.95    |
| <b>Total</b> | 126272 | 66.65 | 29.65    | 101735 | 66.54 | 29.49    | 122182 | 67.80 | 29.60    | 137064 | 65.84 | 29.16    | 130056 | 66.93 | 28.83    | 191136 | 66.81 | 28.76    | 226952 | 67.46 | 28.54    |

  

| Age   | 2013  |       |          | 2014  |       |          | 2015  |       |          | 2016  |       |          | 2017  |       |          | 2018  |       |          | 2019  |       |          |
|-------|-------|-------|----------|-------|-------|----------|-------|-------|----------|-------|-------|----------|-------|-------|----------|-------|-------|----------|-------|-------|----------|
|       | N.    | Mean  | St. dev. |
| 15-19 | 13229 | 75.11 | 26.60    | 14158 | 75.20 | 26.65    | 13362 | 75.71 | 26.25    | 13225 | 75.72 | 26.05    | 13578 | 75.89 | 25.71    | 13544 | 76.54 | 25.34    | 15758 | 74.99 | 26.33    |
| 20-24 | 14844 | 72.17 | 27.33    | 15773 | 72.25 | 28.08    | 15602 | 73.12 | 27.10    | 15103 | 72.46 | 27.22    | 15901 | 72.28 | 27.20    | 15579 | 72.84 | 27.13    | 18811 | 72.21 | 27.42    |
| 25-29 | 15895 | 69.82 | 28.37    | 17191 | 70.55 | 28.76    | 16431 | 70.59 | 28.45    | 16700 | 70.66 | 27.82    | 17313 | 69.78 | 28.32    | 17430 | 70.85 | 27.83    | 19744 | 70.12 | 28.38    |
| 30-34 | 14627 | 68.50 | 28.95    | 16039 | 69.10 | 28.87    | 15677 | 69.74 | 28.48    | 15658 | 69.54 | 28.08    | 16347 | 69.22 | 28.27    | 16413 | 69.71 | 28.02    | 18555 | 69.10 | 28.53    |
| 35-39 | 13402 | 67.69 | 28.97    | 14301 | 68.53 | 29.32    | 14207 | 68.43 | 29.08    | 14001 | 68.15 | 28.68    | 14668 | 68.19 | 28.74    | 14967 | 68.58 | 28.46    | 16776 | 67.92 | 28.87    |
| 40-44 | 12108 | 67.45 | 29.03    | 13167 | 67.62 | 29.44    | 12767 | 67.91 | 28.98    | 12686 | 68.64 | 28.68    | 12877 | 67.58 | 28.91    | 12639 | 67.68 | 28.89    | 14386 | 68.32 | 28.67    |
| 45-49 | 11242 | 67.42 | 29.41    | 11984 | 67.74 | 29.64    | 11350 | 67.57 | 29.24    | 11404 | 67.93 | 28.86    | 11603 | 66.49 | 28.95    | 11332 | 67.45 | 28.71    | 12932 | 67.30 | 28.94    |
| 50-54 | 10584 | 65.90 | 29.80    | 11589 | 66.97 | 30.16    | 11112 | 67.04 | 29.47    | 11072 | 67.46 | 28.99    | 10994 | 66.43 | 28.62    | 10764 | 67.68 | 28.79    | 12364 | 67.50 | 28.97    |
| 55-59 | 8638  | 66.00 | 29.86    | 9649  | 66.64 | 29.98    | 9420  | 67.22 | 29.57    | 9312  | 67.16 | 28.72    | 9935  | 65.95 | 29.18    | 9666  | 66.89 | 28.92    | 11252 | 66.46 | 29.26    |
| 60-64 | 8191  | 66.70 | 29.55    | 9131  | 66.74 | 30.07    | 9011  | 66.68 | 29.55    | 8958  | 67.11 | 29.08    | 9121  | 66.23 | 28.73    | 9022  | 66.48 | 28.68    | 10682 | 66.63 | 28.85    |
| 65-69 | 5758  | 65.85 | 29.66    | 7356  | 67.07 | 30.09    | 7411  | 67.54 | 29.26    | 7510  | 67.61 | 28.46    | 7994  | 67.29 | 28.54    | 7956  | 67.61 | 28.24    | 9303  | 66.88 | 28.39    |

|              |        |       |       |        |       |       |        |       |       |        |       |       |        |       |       |        |       |       |        |       |       |
|--------------|--------|-------|-------|--------|-------|-------|--------|-------|-------|--------|-------|-------|--------|-------|-------|--------|-------|-------|--------|-------|-------|
| <b>70-74</b> | 4410   | 63.72 | 30.30 | 5491   | 64.60 | 30.74 | 5188   | 66.40 | 29.41 | 5556   | 66.91 | 28.95 | 5942   | 66.79 | 28.38 | 5974   | 66.59 | 28.06 | 7255   | 66.50 | 28.08 |
| <b>75-79</b> | 2923   | 62.16 | 30.04 | 3447   | 64.45 | 30.40 | 3501   | 63.40 | 30.29 | 3602   | 65.55 | 28.63 | 3874   | 64.46 | 29.08 | 3683   | 65.62 | 28.65 | 4092   | 65.64 | 28.17 |
| <b>80-84</b> | 1633   | 63.09 | 29.53 | 2032   | 62.90 | 30.45 | 1859   | 62.56 | 29.58 | 2208   | 64.53 | 28.77 | 2241   | 64.06 | 28.21 | 2127   | 64.97 | 28.43 | 2573   | 62.68 | 28.70 |
| <b>85-89</b> | 633    | 61.19 | 29.70 | 708    | 60.34 | 30.64 | 795    | 63.09 | 29.11 | 893    | 64.86 | 29.28 | 944    | 62.74 | 28.08 | 812    | 63.17 | 27.88 | 941    | 63.34 | 27.77 |
| <b>90-94</b> | 169    | 61.18 | 28.09 | 174    | 61.41 | 31.74 | 183    | 63.61 | 28.56 | 247    | 60.32 | 29.52 | 240    | 61.17 | 28.80 | 182    | 65.16 | 26.55 | 254    | 61.89 | 27.65 |
| <b>Total</b> | 138286 | 66.50 | 29.07 | 152190 | 67.01 | 29.69 | 147876 | 67.54 | 28.90 | 148135 | 67.79 | 28.49 | 153572 | 67.16 | 28.36 | 152090 | 67.99 | 28.04 | 175678 | 67.34 | 28.31 |

|              | 2020   |       |          | 2021   |       |          | 2022   |       |          | 2023   |       |          | 2024   |       |          | Total   |       |          |
|--------------|--------|-------|----------|--------|-------|----------|--------|-------|----------|--------|-------|----------|--------|-------|----------|---------|-------|----------|
| Age          | N.     | Mean  | St. dev. | N.      | Mean  | St. dev. |
| <b>15-19</b> | 8634   | 76.55 | 24.40    | 9641   | 75.71 | 26.11    | 11778  | 75.36 | 26.22    | 11635  | 74.91 | 26.48    | 11411  | 76.28 | 25.09    | 254345  | 75.36 | 26.26    |
| <b>20-24</b> | 15657  | 73.88 | 25.66    | 13595  | 72.96 | 27.13    | 14618  | 72.67 | 27.02    | 14651  | 72.67 | 27.29    | 14483  | 73.78 | 26.43    | 300240  | 72.12 | 27.49    |
| <b>25-29</b> | 16030  | 72.64 | 26.18    | 14352  | 71.29 | 27.56    | 15821  | 71.41 | 27.77    | 15387  | 71.46 | 27.68    | 15129  | 72.90 | 26.87    | 315155  | 70.42 | 28.15    |
| <b>30-34</b> | 14633  | 71.69 | 26.76    | 14004  | 70.18 | 28.12    | 15042  | 70.27 | 28.18    | 14975  | 70.45 | 28.23    | 15009  | 71.51 | 27.36    | 293717  | 69.41 | 28.41    |
| <b>35-39</b> | 12416  | 70.76 | 26.79    | 12569  | 69.27 | 27.99    | 13512  | 69.08 | 28.60    | 13867  | 68.72 | 28.63    | 14024  | 70.38 | 27.75    | 270645  | 68.42 | 28.72    |
| <b>40-44</b> | 10950  | 70.87 | 26.93    | 11423  | 69.32 | 28.11    | 12349  | 68.82 | 28.64    | 12744  | 68.61 | 28.35    | 12710  | 69.96 | 28.01    | 244753  | 68.06 | 28.85    |
| <b>45-49</b> | 8770   | 70.14 | 27.67    | 9657   | 69.20 | 28.12    | 10485  | 68.80 | 28.34    | 11054  | 68.57 | 28.46    | 11007  | 70.07 | 27.63    | 217037  | 67.59 | 29.00    |
| <b>50-54</b> | 8097   | 70.79 | 27.21    | 9426   | 69.36 | 28.09    | 10211  | 68.16 | 28.53    | 10593  | 68.34 | 28.60    | 10473  | 69.73 | 27.65    | 202835  | 67.17 | 29.08    |
| <b>55-59</b> | 6616   | 70.06 | 27.75    | 7650   | 69.18 | 28.42    | 8919   | 68.25 | 28.37    | 9256   | 67.89 | 28.62    | 9164   | 70.29 | 27.46    | 171837  | 67.13 | 29.04    |
| <b>60-64</b> | 6006   | 71.07 | 26.68    | 7828   | 68.81 | 27.88    | 9278   | 68.24 | 28.01    | 9347   | 67.82 | 28.19    | 9101   | 69.38 | 27.46    | 162429  | 67.41 | 28.79    |
| <b>65-69</b> | 4864   | 72.39 | 26.11    | 6077   | 70.39 | 27.19    | 8070   | 67.85 | 27.81    | 8229   | 69.13 | 27.83    | 8605   | 69.72 | 27.00    | 131422  | 67.44 | 28.71    |
| <b>70-74</b> | 3994   | 72.33 | 25.37    | 4979   | 69.29 | 26.94    | 6072   | 67.05 | 27.99    | 6405   | 67.84 | 28.03    | 6436   | 68.56 | 27.34    | 102487  | 66.18 | 28.85    |
| <b>75-79</b> | 2035   | 71.83 | 26.17    | 2714   | 70.24 | 26.83    | 3683   | 67.18 | 27.74    | 4010   | 67.10 | 28.07    | 3923   | 68.29 | 27.47    | 62873   | 65.39 | 28.91    |
| <b>80-84</b> | 1181   | 70.27 | 26.02    | 1669   | 67.17 | 27.54    | 2330   | 65.47 | 27.77    | 2193   | 65.51 | 28.03    | 2220   | 66.37 | 27.82    | 36561   | 64.31 | 28.89    |
| <b>85-89</b> | 461    | 70.80 | 26.28    | 641    | 66.93 | 26.23    | 949    | 65.16 | 26.50    | 816    | 65.51 | 27.43    | 890    | 66.63 | 27.57    | 13871   | 64.32 | 28.55    |
| <b>90-94</b> | 120    | 65.50 | 25.66    | 200    | 67.70 | 26.35    | 248    | 64.60 | 26.75    | 191    | 67.85 | 28.12    | 226    | 65.22 | 26.45    | 3435    | 63.90 | 28.40    |
| <b>Total</b> | 120464 | 71.35 | 26.35    | 126425 | 69.81 | 27.41    | 143365 | 68.65 | 27.77    | 145353 | 68.90 | 28.00    | 144811 | 69.94 | 27.21    | 2783642 | 67.79 | 28.51    |

**Table S5a-k. Regional Positive Experiences Index (2006-2024) -- participant numbers, means, and standard deviations**

Table S5a. EU Positive Experiences Index (2006, 2015, and 2024) – participant numbers, means, and standard deviations

| EU  |      |      |          |      |      |          |      |      |          |       |      |          |
|-----|------|------|----------|------|------|----------|------|------|----------|-------|------|----------|
|     | 2006 |      |          | 2015 |      |          | 2024 |      |          | Total |      |          |
| Age | N.   | Mean | St. dev. | N.   | Mean | St. dev. | N.   | Mean | St. dev. | N.    | Mean | St. dev. |

|              |              |              |              |              |              |              |              |              |              |              |              |              |
|--------------|--------------|--------------|--------------|--------------|--------------|--------------|--------------|--------------|--------------|--------------|--------------|--------------|
| 15-19        | 1196         | 76.62        | 22.95        | 1035         | 82.18        | 22.26        | 524          | 80.53        | 21.49        | 2755         | 79.78        | 22.23        |
| 20-24        | 1926         | 72.33        | 25.27        | 1922         | 78.37        | 24.57        | 1190         | 77.11        | 23.68        | 5038         | 75.93        | 24.51        |
| 25-29        | 1746         | 70.52        | 26.38        | 1834         | 74.69        | 26.00        | 1424         | 75.39        | 24.41        | 5004         | 73.53        | 25.60        |
| 30-34        | 2192         | 69.21        | 26.90        | 2342         | 74.18        | 26.73        | 1838         | 73.43        | 25.14        | 6372         | 72.27        | 26.26        |
| 35-39        | 2389         | 68.93        | 26.34        | 2211         | 72.12        | 27.62        | 2100         | 73.05        | 25.78        | 6700         | 71.37        | 26.58        |
| 40-44        | 2570         | 67.63        | 27.84        | 2493         | 71.68        | 27.25        | 2221         | 72.38        | 25.87        | 7284         | 70.56        | 26.99        |
| 45-49        | 2243         | 66.35        | 27.94        | 2275         | 69.48        | 28.38        | 2313         | 72.11        | 26.07        | 6831         | 69.31        | 27.46        |
| 50-54        | 2394         | 64.86        | 28.85        | 2511         | 68.41        | 28.87        | 2457         | 71.29        | 25.90        | 7362         | 68.19        | 27.88        |
| 55-59        | 2271         | 67.01        | 27.70        | 2519         | 67.00        | 29.53        | 2386         | 72.63        | 26.10        | 7176         | 68.88        | 27.78        |
| 60-64        | 2089         | 66.07        | 28.04        | 2527         | 68.09        | 29.15        | 2324         | 71.94        | 26.16        | 6940         | 68.70        | 27.78        |
| 65-69        | 1704         | 66.35        | 26.67        | 2549         | 69.14        | 28.87        | 2786         | 71.79        | 26.05        | 7039         | 69.10        | 27.20        |
| 70-74        | 1421         | 64.72        | 27.62        | 1762         | 66.55        | 29.72        | 2026         | 69.71        | 26.55        | 5209         | 66.99        | 27.96        |
| 75-79        | 965          | 64.15        | 27.96        | 1161         | 60.29        | 30.26        | 1313         | 69.35        | 26.81        | 3439         | 64.60        | 28.34        |
| 80-84        | 673          | 58.43        | 30.40        | 596          | 58.93        | 29.72        | 726          | 65.98        | 26.97        | 1995         | 61.11        | 29.03        |
| 85-89        | 155          | 64.65        | 26.46        | 252          | 57.46        | 29.71        | 302          | 64.97        | 27.96        | 709          | 62.36        | 28.05        |
| 90-94        | 23           | 67.83        | 26.10        | 57           | 63.51        | 27.81        | 64           | 66.25        | 26.16        | 144          | 65.86        | 26.69        |
| <b>Total</b> | <b>25957</b> | <b>67.23</b> | <b>27.09</b> | <b>28046</b> | <b>68.88</b> | <b>27.90</b> | <b>25994</b> | <b>71.75</b> | <b>25.69</b> | <b>79997</b> | <b>69.28</b> | <b>26.90</b> |

Table S5b. Europe Other Positive Experiences Index (2006, 2015, and 2024) – participant numbers, means, and standard deviations

| Europe Other |      |       |          |      |       |          |      |       |          |       |       |          |
|--------------|------|-------|----------|------|-------|----------|------|-------|----------|-------|-------|----------|
| Age          | 2006 |       |          | 2015 |       |          | 2024 |       |          | Total |       |          |
|              | N.   | Mean  | St. dev. | N.   | Mean  | St. dev. | N.   | Mean  | St. dev. | N.    | Mean  | St. dev. |
| 15-19        | 613  | 72.63 | 27.59    | 636  | 78.68 | 23.77    | 542  | 80.92 | 22.39    | 1690  | 77.28 | 24.35    |
| 20-24        | 1072 | 65.24 | 31.87    | 774  | 75.06 | 24.81    | 768  | 73.31 | 25.42    | 2497  | 69.78 | 28.04    |
| 25-29        | 938  | 66.40 | 31.43    | 721  | 68.99 | 28.56    | 767  | 69.44 | 27.62    | 2319  | 68.43 | 28.84    |
| 30-34        | 896  | 64.58 | 31.53    | 704  | 67.81 | 27.15    | 746  | 68.20 | 27.52    | 2342  | 66.87 | 28.22    |
| 35-39        | 873  | 63.18 | 32.02    | 756  | 64.71 |          | 784  | 63.32 | 28.13    | 2436  | 65.61 | 29.22    |
| 40-44        | 929  | 60.39 | 31.69    | 791  | 61.85 | 30.57    | 768  | 63.57 | 29.55    | 2542  | 62.76 | 30.06    |
| 45-49        | 884  | 57.44 | 32.78    | 767  | 62.29 | 30.26    | 780  | 65.21 | 29.60    | 2478  | 61.98 | 30.45    |
| 50-54        | 904  | 59.47 | 32.19    | 808  | 61.24 | 30.68    | 855  | 64.02 | 29.94    | 2608  | 61.87 | 30.46    |
| 55-59        | 671  | 60.57 | 31.92    | 739  | 59.57 | 30.14    | 777  | 61.36 | 29.91    | 2360  | 62.45 | 30.09    |

|              |      |       |       |      |       |       |      |       |       |       |       |       |
|--------------|------|-------|-------|------|-------|-------|------|-------|-------|-------|-------|-------|
| <b>60-64</b> | 544  | 59.60 | 33.21 | 686  | 60.35 | 29.85 | 823  | 62.70 | 29.50 | 2131  | 61.00 | 30.64 |
| <b>65-69</b> | 457  | 56.89 | 32.66 | 611  | 60.20 | 30.64 | 706  | 64.76 | 28.68 | 2235  | 61.22 | 30.31 |
| <b>70-74</b> | 360  | 54.11 | 32.48 | 498  | 59.52 | 30.47 | 531  | 63.95 | 29.39 | 1648  | 58.62 | 30.15 |
| <b>75-79</b> | 183  | 52.90 | 33.48 | 345  | 59.94 | 29.23 | 365  | 62.25 | 28.98 | 1000  | 58.47 | 30.34 |
| <b>80-84</b> | 99   | 60.61 | 30.57 | 160  | 57.63 | 30.70 | 205  | 61.85 | 29.41 | 523   | 58.65 | 30.16 |
| <b>85-89</b> | 27   | 54.07 | 30.79 | 69   | 68.12 | 26.64 | 73   | 54.25 | 29.15 | 181   | 59.71 | 29.51 |
| <b>90-94</b> | 4    | 55.00 | 44.35 | 10   | 56.00 | 22.71 | 15   | 61.33 | 28.75 | 41    | 59.72 | 31.64 |
| <b>Total</b> | 9454 | 60.19 | 32.53 | 9075 | 63.87 | 28.41 | 9505 | 65.03 | 28.37 | 29031 | 63.40 | 29.53 |

Table S5c. Independent States Positive Experiences Index (2006, 2015, and 2024) – participant numbers, means, and standard deviations

|              | Independent States |       |          |       |       |          |      |       |          |       |       |          |
|--------------|--------------------|-------|----------|-------|-------|----------|------|-------|----------|-------|-------|----------|
|              | 2006               |       |          | 2015  |       |          | 2024 |       |          | Total |       |          |
| Age          | N.                 | Mean  | St. dev. | N.    | Mean  | St. dev. | N.   | Mean  | St. dev. | N.    | Mean  | St. dev. |
| <b>15-19</b> | 960                | 70.83 | 28.09    | 1073  | 76.96 | 25.23    | 704  | 80.26 | 22.03    | 2737  | 76.02 | 25.12    |
| <b>20-24</b> | 973                | 62.34 | 30.05    | 1379  | 72.40 | 27.00    | 662  | 76.95 | 24.74    | 3014  | 70.56 | 27.26    |
| <b>25-29</b> | 965                | 59.77 | 30.86    | 1393  | 68.33 | 29.66    | 804  | 70.85 | 27.51    | 3162  | 66.32 | 29.34    |
| <b>30-34</b> | 895                | 56.63 | 30.91    | 1382  | 66.22 | 29.57    | 1029 | 70.03 | 27.78    | 3306  | 64.29 | 29.42    |
| <b>35-39</b> | 942                | 54.90 | 31.12    | 1171  | 64.39 | 30.59    | 1106 | 67.85 | 27.91    | 3219  | 62.38 | 29.87    |
| <b>40-44</b> | 956                | 52.59 | 31.87    | 1139  | 61.44 | 31.00    | 989  | 67.20 | 28.78    | 3084  | 60.41 | 30.55    |
| <b>45-49</b> | 971                | 50.85 | 32.51    | 1050  | 59.68 | 31.65    | 854  | 65.11 | 28.52    | 2875  | 58.55 | 30.89    |
| <b>50-54</b> | 847                | 51.52 | 31.65    | 1084  | 58.69 | 31.19    | 762  | 66.75 | 27.89    | 2693  | 58.99 | 30.25    |
| <b>55-59</b> | 641                | 52.82 | 31.56    | 951   | 57.71 | 31.23    | 709  | 64.85 | 28.13    | 2301  | 58.46 | 30.31    |
| <b>60-64</b> | 406                | 50.69 | 31.19    | 870   | 55.61 | 32.85    | 800  | 63.13 | 28.03    | 2076  | 56.47 | 30.69    |
| <b>65-69</b> | 667                | 45.73 | 30.92    | 612   | 54.05 | 30.49    | 662  | 61.78 | 27.43    | 1941  | 53.85 | 29.62    |
| <b>70-74</b> | 443                | 45.06 | 31.35    | 317   | 47.19 | 31.44    | 485  | 61.24 | 27.18    | 1245  | 51.16 | 29.99    |
| <b>75-79</b> | 360                | 42.11 | 30.92    | 364   | 47.64 | 31.46    | 242  | 58.93 | 25.45    | 966   | 49.56 | 29.28    |
| <b>80-84</b> | 138                | 41.01 | 30.79    | 153   | 48.10 | 30.47    | 113  | 53.45 | 27.57    | 404   | 47.52 | 29.61    |
| <b>85-89</b> | 35                 | 42.29 | 29.81    | 57    | 49.12 | 27.79    | 55   | 55.64 | 24.85    | 147   | 49.01 | 27.49    |
| <b>90-94</b> | 5                  | 24.00 | 26.08    | 14    | 42.86 | 30.24    | 8    | 47.50 | 28.16    | 27    | 38.12 | 28.16    |
| <b>Total</b> | 10204              | 50.20 | 30.61    | 13009 | 58.15 | 30.12    | 9984 | 64.47 | 27.00    | 33197 | 57.60 | 29.24    |

Table S5d. Australia/New Zealand Positive Experiences Index (2006, 2015, and 2024) – participant numbers, means, and standard deviations

| Australia/New Zealand |      |        |          |      |       |          |      |       |          |       |       |          |
|-----------------------|------|--------|----------|------|-------|----------|------|-------|----------|-------|-------|----------|
| Age                   | 2006 |        |          | 2015 |       |          | 2024 |       |          | Total |       |          |
|                       | N.   | Mean   | St. dev. | N.   | Mean  | St. dev. | N.   | Mean  | St. dev. | N.    | Mean  | St. dev. |
| 15-19                 | 261  | 82.38  | 20.05    | 87   | 85.98 | 20.03    | 71   | 80.00 | 24.38    | 419   | 82.78 | 21.49    |
| 20-24                 | 120  | 76.83  | 21.22    | 45   | 81.33 | 24.27    | 113  | 75.22 | 23.80    | 278   | 77.80 | 23.10    |
| 25-29                 | 141  | 77.87  | 20.10    | 38   | 74.21 | 28.63    | 115  | 76.87 | 22.73    | 294   | 76.32 | 23.82    |
| 30-34                 | 179  | 76.76  | 25.89    | 43   | 71.63 | 31.84    | 109  | 75.23 | 23.08    | 331   | 74.54 | 26.94    |
| 35-39                 | 222  | 74.23  | 24.50    | 79   | 75.95 | 26.29    | 104  | 78.27 | 22.31    | 405   | 76.15 | 24.37    |
| 40-44                 | 174  | 72.76  | 24.15    | 115  | 74.78 | 25.14    | 124  | 70.97 | 29.89    | 413   | 72.84 | 26.39    |
| 45-49                 | 159  | 75.47  | 23.16    | 143  | 76.08 | 26.14    | 131  | 77.10 | 22.34    | 433   | 76.22 | 23.88    |
| 50-54                 | 166  | 78.19  | 22.54    | 181  | 73.26 | 27.75    | 180  | 73.00 | 27.11    | 527   | 74.82 | 25.80    |
| 55-59                 | 179  | 80.34  | 20.93    | 212  | 78.21 | 24.29    | 177  | 76.95 | 23.59    | 568   | 78.50 | 22.94    |
| 60-64                 | 132  | 79.70  | 22.65    | 235  | 77.62 | 24.97    | 165  | 79.39 | 24.44    | 532   | 78.90 | 24.02    |
| 65-69                 | 105  | 82.67  | 17.11    | 261  | 81.38 | 22.49    | 171  | 77.54 | 22.88    | 537   | 80.53 | 20.83    |
| 70-74                 | 67   | 80.60  | 23.61    | 173  | 85.20 | 18.00    | 177  | 81.47 | 24.12    | 417   | 82.42 | 21.91    |
| 75-79                 | 60   | 86.00  | 18.15    | 157  | 82.68 | 22.99    | 140  | 79.29 | 24.51    | 357   | 82.65 | 21.89    |
| 80-84                 | 32   | 74.38  | 21.09    | 117  | 77.44 | 25.13    | 87   | 82.53 | 21.52    | 236   | 78.11 | 22.58    |
| 85-89                 | 8    | 80.00  | 21.38    | 67   | 75.82 | 25.24    | 54   | 82.22 | 21.86    | 129   | 79.35 | 22.83    |
| 90-94                 | 1    | 100.00 |          | 16   | 67.50 | 28.17    | 15   | 73.33 | 19.52    | 32    | 80.28 | 23.84    |
| <b>Total</b>          | 2006 | 79.89  | 21.77    | 1969 | 77.44 | 25.08    | 1933 | 77.46 | 23.63    | 5908  | 78.26 | 23.49    |

Table S5e. South East Asia Positive Experiences Index (2006, 2015, and 2024) – participant numbers, means, and standard deviations

| South East Asia |      |       |          |      |       |          |      |       |          |       |       |          |
|-----------------|------|-------|----------|------|-------|----------|------|-------|----------|-------|-------|----------|
| Age             | 2006 |       |          | 2015 |       |          | 2024 |       |          | Total |       |          |
|                 | N.   | Mean  | St. dev. | N.   | Mean  | St. dev. | N.   | Mean  | St. dev. | N.    | Mean  | St. dev. |
| 15-19           | 695  | 74.28 | 27.06    | 638  | 80.38 | 22.77    | 643  | 83.83 | 19.68    | 1976  | 79.49 | 23.17    |
| 20-24           | 1026 | 71.60 | 28.52    | 718  | 78.33 | 24.63    | 861  | 79.21 | 23.25    | 2605  | 76.38 | 25.47    |
| 25-29           | 1032 | 72.96 | 28.22    | 833  | 75.49 | 26.33    | 951  | 77.94 | 23.41    | 2816  | 75.46 | 25.99    |
| 30-34           | 928  | 72.50 | 27.68    | 876  | 76.16 | 25.74    | 1039 | 76.84 | 23.74    | 2843  | 75.17 | 25.72    |
| 35-39           | 924  | 72.68 | 27.57    | 909  | 75.64 | 27.02    | 934  | 76.10 | 25.21    | 2767  | 74.81 | 26.60    |

|              |             |              |              |             |              |              |             |              |              |              |              |              |
|--------------|-------------|--------------|--------------|-------------|--------------|--------------|-------------|--------------|--------------|--------------|--------------|--------------|
| 40-44        | 823         | 72.51        | 27.16        | 771         | 75.90        | 25.92        | 825         | 75.83        | 25.26        | 2419         | 74.75        | 26.11        |
| 45-49        | 731         | 69.38        | 29.43        | 737         | 74.11        | 26.37        | 764         | 75.34        | 24.90        | 2232         | 72.95        | 26.90        |
| 50-54        | 575         | 71.70        | 28.95        | 658         | 74.41        | 26.83        | 773         | 75.73        | 24.95        | 2006         | 73.94        | 26.91        |
| 55-59        | 358         | 71.70        | 28.58        | 608         | 76.71        | 25.51        | 615         | 74.24        | 25.22        | 1581         | 74.22        | 26.44        |
| 60-64        | 291         | 72.58        | 29.53        | 504         | 76.55        | 24.52        | 610         | 71.77        | 26.26        | 1405         | 73.63        | 26.77        |
| 65-69        | 161         | 69.94        | 29.15        | 334         | 74.13        | 25.55        | 479         | 72.65        | 26.15        | 974          | 72.24        | 26.95        |
| 70-74        | 116         | 70.99        | 27.34        | 219         | 74.06        | 25.33        | 308         | 73.77        | 24.54        | 643          | 72.94        | 25.74        |
| 75-79        | 66          | 74.70        | 28.61        | 135         | 72.44        | 25.38        | 164         | 69.88        | 25.40        | 365          | 72.34        | 26.46        |
| 80-84        | 34          | 76.47        | 22.68        | 47          | 74.47        | 20.30        | 67          | 70.15        | 26.14        | 148          | 73.70        | 23.04        |
| 85-89        | 9           | 63.89        | 32.57        | 30          | 73.33        | 27.46        | 28          | 67.86        | 22.00        | 67           | 68.36        | 27.35        |
| 90-94        | 2           | 70.00        | 14.14        | 3           | 80.00        | 34.64        | 6           | 60.00        | 12.65        | 11           | 70.00        | 20.48        |
| <b>Total</b> | <b>7771</b> | <b>71.74</b> | <b>27.33</b> | <b>8020</b> | <b>75.76</b> | <b>25.89</b> | <b>9067</b> | <b>73.82</b> | <b>23.67</b> | <b>24858</b> | <b>73.77</b> | <b>25.63</b> |

Table S5f. South Asia Positive Experiences Index (2006, 2015, and 2024) – participant numbers, means, and standard deviations

| South Asia |      |       |          |      |       |          |      |       |          |       |       |          |
|------------|------|-------|----------|------|-------|----------|------|-------|----------|-------|-------|----------|
|            | 2006 |       |          | 2015 |       |          | 2024 |       |          | Total |       |          |
| Age        | N.   | Mean  | St. dev. | N.   | Mean  | St. dev. | N.   | Mean  | St. dev. | N.    | Mean  | St. dev. |
| 15-19      | 624  | 69.30 | 26.83    | 982  | 74.44 | 27.70    | 708  | 74.01 | 26.71    | 2314  | 72.58 | 27.08    |
| 20-24      | 849  | 62.43 | 28.26    | 1081 | 68.70 | 29.34    | 809  | 71.15 | 28.16    | 2739  | 67.42 | 28.58    |
| 25-29      | 850  | 60.71 | 30.65    | 1134 | 66.54 | 29.60    | 861  | 68.66 | 28.36    | 2845  | 65.30 | 29.54    |
| 30-34      | 806  | 60.35 | 28.92    | 1138 | 63.73 | 29.17    | 853  | 65.58 | 29.45    | 2797  | 63.22 | 29.18    |
| 35-39      | 721  | 60.11 | 30.08    | 1021 | 62.90 | 30.77    | 798  | 61.05 | 30.24    | 2540  | 61.35 | 30.36    |
| 40-44      | 619  | 58.44 | 29.81    | 823  | 60.66 | 30.42    | 652  | 62.91 | 29.76    | 2094  | 60.67 | 30.00    |
| 45-49      | 472  | 59.40 | 29.69    | 721  | 63.30 | 30.18    | 546  | 62.53 | 29.75    | 1739  | 61.74 | 29.88    |
| 50-54      | 337  | 54.33 | 31.41    | 560  | 60.43 | 31.78    | 475  | 59.45 | 29.46    | 1372  | 58.07 | 30.89    |
| 55-59      | 287  | 60.77 | 29.05    | 463  | 60.43 | 30.80    | 359  | 61.06 | 29.41    | 1109  | 60.75 | 29.75    |
| 60-64      | 216  | 62.11 | 28.79    | 453  | 58.63 | 30.32    | 375  | 57.92 | 29.23    | 1044  | 59.55 | 29.45    |
| 65-69      | 152  | 61.09 | 30.36    | 286  | 58.53 | 31.15    | 266  | 60.60 | 29.07    | 704   | 60.07 | 30.19    |
| 70-74      | 115  | 52.61 | 29.37    | 239  | 58.08 | 31.83    | 196  | 57.35 | 28.74    | 550   | 56.01 | 29.98    |
| 75-79      | 61   | 52.95 | 30.50    | 93   | 63.87 | 31.24    | 105  | 64.00 | 26.66    | 259   | 60.27 | 29.47    |
| 80-84      | 25   | 56.00 | 26.93    | 53   | 59.25 | 30.37    | 60   | 57.67 | 30.83    | 138   | 57.64 | 29.38    |
| 85-89      | 11   | 46.82 | 30.68    | 16   | 70.00 | 33.47    | 11   | 60.00 | 25.30    | 38    | 58.94 | 29.82    |

|              |      |        |       |      |       |       |      |       |       |       |       |       |
|--------------|------|--------|-------|------|-------|-------|------|-------|-------|-------|-------|-------|
| <b>90-94</b> | 1    | 100.00 |       | 7    | 57.14 | 26.90 | 4    | 40.00 | 28.28 | 12    | 65.71 | 27.59 |
| <b>Total</b> | 6146 | 61.09  | 29.42 | 9070 | 62.91 | 30.32 | 7078 | 61.50 | 28.71 | 22294 | 61.83 | 29.48 |

Table S5g. East Asia Positive Experiences Index (2006, 2015, and 2024) – participant numbers, means, and standard deviations

| East Asia    |      |       |          |      |       |          |      |       |          |       |       |          |
|--------------|------|-------|----------|------|-------|----------|------|-------|----------|-------|-------|----------|
| Age          | 2006 |       |          | 2015 |       |          | 2024 |       |          | Total |       |          |
|              | N.   | Mean  | St. dev. | N.   | Mean  | St. dev. | N.   | Mean  | St. dev. | N.    | Mean  | St. dev. |
| 15-19        | 514  | 74.01 | 25.56    | 415  | 77.11 | 23.70    | 266  | 75.56 | 25.83    | 1195  | 75.56 | 25.03    |
| 20-24        | 694  | 71.35 | 27.16    | 542  | 76.27 | 24.63    | 438  | 77.17 | 24.82    | 1674  | 74.93 | 25.54    |
| 25-29        | 644  | 69.81 | 27.01    | 642  | 71.99 | 27.55    | 466  | 75.67 | 26.02    | 1752  | 72.49 | 26.86    |
| 30-34        | 756  | 69.47 | 25.57    | 634  | 69.40 | 27.86    | 472  | 72.20 | 25.68    | 1862  | 70.36 | 26.37    |
| 35-39        | 841  | 69.51 | 25.85    | 595  | 67.56 | 27.56    | 507  | 69.86 | 27.15    | 1943  | 68.98 | 26.86    |
| 40-44        | 829  | 68.95 | 26.02    | 750  | 68.69 | 27.40    | 475  | 71.16 | 27.11    | 2054  | 69.60 | 26.84    |
| 45-49        | 711  | 67.45 | 27.56    | 801  | 69.84 | 26.61    | 487  | 72.69 | 26.99    | 1999  | 69.99 | 27.05    |
| 50-54        | 730  | 69.37 | 26.00    | 890  | 68.22 | 27.44    | 551  | 69.07 | 28.32    | 2171  | 68.89 | 27.25    |
| 55-59        | 563  | 68.06 | 26.11    | 658  | 68.54 | 28.14    | 509  | 67.94 | 29.19    | 1730  | 68.18 | 27.81    |
| 60-64        | 452  | 66.86 | 26.47    | 758  | 66.70 | 28.68    | 508  | 67.91 | 28.36    | 1718  | 67.16 | 27.84    |
| 65-69        | 345  | 70.03 | 25.52    | 586  | 68.36 | 27.93    | 412  | 67.23 | 28.06    | 1343  | 68.54 | 27.17    |
| 70-74        | 304  | 68.36 | 25.69    | 437  | 67.51 | 26.96    | 357  | 70.87 | 25.80    | 1098  | 68.91 | 26.15    |
| 75-79        | 132  | 68.48 | 24.48    | 290  | 64.48 | 28.54    | 267  | 64.87 | 29.77    | 689   | 65.95 | 27.59    |
| 80-84        | 80   | 67.50 | 25.53    | 177  | 64.75 | 30.00    | 185  | 63.46 | 28.61    | 442   | 65.24 | 28.05    |
| 85-89        | 13   | 78.46 | 22.30    | 55   | 60.36 | 28.93    | 86   | 62.33 | 28.35    | 154   | 67.05 | 26.53    |
| 90-94        | 2    | 70.00 | 42.43    | 15   | 72.00 | 21.11    | 30   | 56.00 | 28.48    | 47    | 66.00 | 30.67    |
| <b>Total</b> | 7610 | 69.86 | 26.83    | 8245 | 68.86 | 27.07    | 6016 | 69.00 | 27.41    | 21871 | 69.24 | 27.10    |

Table S5h. Latin America Positive Experiences Index (2006, 2015, and 2024) – participant numbers, means, and standard deviations

| Latin America |      |       |          |      |       |          |      |       |          |       |       |          |
|---------------|------|-------|----------|------|-------|----------|------|-------|----------|-------|-------|----------|
| Age           | 2006 |       |          | 2015 |       |          | 2024 |       |          | Total |       |          |
|               | N.   | Mean  | St. dev. | N.   | Mean  | St. dev. | N.   | Mean  | St. dev. | N.    | Mean  | St. dev. |
| 15-19         | 2632 | 81.90 | 23.03    | 1833 | 84.90 | 20.24    | 1431 | 86.14 | 18.81    | 5896  | 84.31 | 20.69    |
| 20-24         | 2402 | 78.58 | 25.61    | 1999 | 81.89 | 23.00    | 1802 | 83.35 | 21.03    | 6203  | 81.28 | 23.21    |

|              |              |              |              |              |              |              |              |              |              |              |              |              |
|--------------|--------------|--------------|--------------|--------------|--------------|--------------|--------------|--------------|--------------|--------------|--------------|--------------|
| 25-29        | 2304         | 76.28        | 26.43        | 1932         | 79.59        | 24.06        | 1862         | 82.24        | 22.01        | 6098         | 79.37        | 24.17        |
| 30-34        | 2124         | 76.73        | 25.84        | 1890         | 78.23        | 24.45        | 1843         | 81.17        | 22.90        | 5857         | 78.71        | 24.40        |
| 35-39        | 2053         | 75.35        | 26.54        | 1783         | 76.90        | 26.04        | 1718         | 80.14        | 22.95        | 5554         | 77.47        | 25.17        |
| 40-44        | 1883         | 75.38        | 26.95        | 1544         | 76.83        | 25.15        | 1682         | 79.42        | 24.98        | 5109         | 77.21        | 25.69        |
| 45-49        | 1600         | 75.64        | 27.48        | 1357         | 76.67        | 25.52        | 1508         | 78.36        | 24.31        | 4465         | 76.89        | 25.77        |
| 50-54        | 1460         | 75.30        | 26.98        | 1445         | 75.79        | 26.80        | 1388         | 79.35        | 23.33        | 4293         | 76.82        | 25.70        |
| 55-59        | 1232         | 75.73        | 27.45        | 1162         | 78.35        | 25.01        | 1309         | 77.42        | 24.81        | 3703         | 77.17        | 25.76        |
| 60-64        | 1216         | 74.01        | 27.11        | 1062         | 76.52        | 25.54        | 1370         | 78.66        | 23.81        | 3648         | 76.40        | 25.49        |
| 65-69        | 821          | 77.47        | 25.38        | 929          | 75.91        | 25.16        | 1165         | 78.16        | 23.41        | 2915         | 77.18        | 24.65        |
| 70-74        | 654          | 77.46        | 24.15        | 712          | 75.11        | 24.83        | 959          | 76.79        | 24.05        | 2325         | 76.45        | 24.34        |
| 75-79        | 410          | 78.39        | 25.53        | 499          | 74.95        | 25.88        | 605          | 76.43        | 24.80        | 1514         | 76.59        | 25.40        |
| 80-84        | 244          | 77.13        | 25.91        | 271          | 73.73        | 24.72        | 357          | 76.86        | 23.68        | 872          | 75.91        | 24.77        |
| 85-89        | 86           | 75.81        | 26.94        | 131          | 70.84        | 26.52        | 135          | 77.48        | 21.36        | 352          | 74.71        | 24.94        |
| 90-94        | 31           | 83.23        | 18.69        | 22           | 77.27        | 19.80        | 28           | 74.29        | 19.52        | 81           | 78.26        | 19.34        |
| <b>Total</b> | <b>21152</b> | <b>77.15</b> | <b>25.63</b> | <b>18571</b> | <b>77.09</b> | <b>24.55</b> | <b>19162</b> | <b>79.14</b> | <b>22.86</b> | <b>58885</b> | <b>77.79</b> | <b>24.34</b> |

Table S5i. North America Positive Experiences Index (2006, 2015, and 2024) – participant numbers, means, and standard deviations

| North America |      |       |          |      |       |          |      |       |          |       |       |          |
|---------------|------|-------|----------|------|-------|----------|------|-------|----------|-------|-------|----------|
| Age           | 2006 |       |          | 2015 |       |          | 2024 |       |          | Total |       |          |
|               | N.   | Mean  | St. dev. | N.   | Mean  | St. dev. | N.   | Mean  | St. dev. | N.    | Mean  | St. dev. |
| 15-19         | 96   | 82.71 | 18.27    | 415  | 77.11 | 23.70    | 74   | 84.86 | 22.16    | 585   | 81.56 | 21.38    |
| 20-24         | 126  | 75.08 | 26.50    | 542  | 76.27 | 24.63    | 116  | 77.41 | 23.52    | 784   | 76.26 | 24.88    |
| 25-29         | 158  | 78.48 | 23.08    | 642  | 71.99 | 27.55    | 133  | 75.79 | 25.94    | 933   | 75.42 | 25.52    |
| 30-34         | 172  | 75.93 | 22.58    | 634  | 69.40 | 27.86    | 136  | 70.59 | 26.32    | 942   | 71.97 | 25.59    |
| 35-39         | 216  | 76.39 | 24.09    | 595  | 67.56 | 27.56    | 137  | 72.55 | 25.09    | 948   | 72.17 | 25.58    |
| 40-44         | 272  | 72.28 | 27.34    | 750  | 68.69 | 27.40    | 145  | 72.97 | 25.98    | 1167  | 71.31 | 26.91    |
| 45-49         | 242  | 76.61 | 24.04    | 801  | 69.84 | 26.61    | 103  | 75.73 | 24.84    | 1146  | 74.06 | 25.16    |
| 50-54         | 245  | 73.14 | 27.08    | 890  | 68.22 | 27.44    | 134  | 69.55 | 28.47    | 1269  | 70.31 | 27.66    |
| 55-59         | 206  | 80.00 | 24.36    | 658  | 68.54 | 28.14    | 162  | 75.93 | 25.13    | 1026  | 74.82 | 25.88    |
| 60-64         | 206  | 81.84 | 23.34    | 758  | 66.70 | 28.68    | 215  | 76.09 | 27.06    | 1179  | 74.88 | 26.36    |
| 65-69         | 125  | 81.76 | 24.89    | 586  | 68.36 | 27.93    | 191  | 80.73 | 25.74    | 902   | 76.95 | 26.19    |
| 70-74         | 83   | 80.24 | 22.63    | 437  | 67.51 | 26.96    | 183  | 80.44 | 20.96    | 703   | 76.06 | 23.52    |

|              |             |              |              |             |              |              |             |              |              |              |              |              |
|--------------|-------------|--------------|--------------|-------------|--------------|--------------|-------------|--------------|--------------|--------------|--------------|--------------|
| 75-79        | 81          | 79.75        | 22.25        | 290         | 64.48        | 28.54        | 129         | 77.67        | 23.93        | 500          | 73.97        | 24.91        |
| 80-84        | 63          | 78.10        | 23.75        | 177         | 64.75        | 30.00        | 82          | 81.71        | 22.49        | 322          | 74.85        | 25.41        |
| 85-89        | 22          | 83.64        | 22.79        | 55          | 60.36        | 28.93        | 36          | 80.00        | 19.12        | 113          | 74.67        | 23.62        |
| 90-94        | 1           | 60.00        | 23.80        | 15          | 72.00        | 21.11        | 5           | 100.00       | 0.00         | 21           | 77.33        | 14.97        |
| <b>Total</b> | <b>2314</b> | <b>77.25</b> | <b>23.80</b> | <b>8245</b> | <b>68.86</b> | <b>27.07</b> | <b>1981</b> | <b>78.25</b> | <b>22.92</b> | <b>12540</b> | <b>74.79</b> | <b>24.60</b> |

Table S5j. Middle East and North Africa Positive Experiences Index (2006, 2015, and 2024) – participant numbers, means, and standard deviations

| Middle East and North Africa |              |              |              |              |              |              |              |              |              |              |              |              |
|------------------------------|--------------|--------------|--------------|--------------|--------------|--------------|--------------|--------------|--------------|--------------|--------------|--------------|
| Age                          | 2006         |              |              | 2015         |              |              | 2024         |              |              | Total        |              |              |
|                              | N.           | Mean         | St. dev.     |
| 15-19                        | 1009         | 65.81        | 31.47        | 1627         | 67.84        | 30.29        | 1495         | 71.77        | 26.18        | 4131         | 68.47        | 29.31        |
| 20-24                        | 1964         | 67.28        | 30.97        | 2203         | 66.52        | 29.68        | 1953         | 69.65        | 27.61        | 6120         | 67.82        | 29.42        |
| 25-29                        | 1932         | 64.98        | 31.79        | 2592         | 66.06        | 30.13        | 2383         | 69.63        | 28.27        | 6907         | 66.89        | 30.06        |
| 30-34                        | 1653         | 65.05        | 31.80        | 2503         | 65.23        | 30.25        | 2370         | 68.08        | 28.99        | 6526         | 66.12        | 30.35        |
| 35-39                        | 1296         | 63.81        | 32.07        | 2191         | 63.44        | 30.97        | 2095         | 64.86        | 29.13        | 5582         | 64.04        | 30.72        |
| 40-44                        | 1039         | 65.06        | 30.74        | 1882         | 63.97        | 30.30        | 1752         | 64.06        | 29.59        | 4673         | 64.37        | 30.21        |
| 45-49                        | 779          | 65.16        | 31.15        | 1425         | 63.40        | 31.15        | 1266         | 62.80        | 29.80        | 3470         | 63.78        | 30.70        |
| 50-54                        | 577          | 61.21        | 32.11        | 1226         | 62.43        | 30.80        | 1085         | 61.51        | 29.97        | 2888         | 61.72        | 30.96        |
| 55-59                        | 371          | 59.89        | 30.95        | 785          | 60.76        | 31.71        | 814          | 63.05        | 28.98        | 1970         | 61.23        | 30.55        |
| 60-64                        | 277          | 57.69        | 33.02        | 710          | 59.86        | 30.57        | 686          | 59.62        | 27.79        | 1673         | 59.06        | 30.46        |
| 65-69                        | 185          | 59.89        | 31.79        | 383          | 56.29        | 29.90        | 451          | 56.72        | 27.29        | 1019         | 57.63        | 29.66        |
| 70-74                        | 109          | 57.80        | 30.83        | 236          | 60.85        | 30.31        | 365          | 54.79        | 30.31        | 710          | 57.81        | 30.48        |
| 75-79                        | 46           | 59.57        | 30.25        | 119          | 58.15        | 29.80        | 193          | 54.30        | 29.20        | 358          | 57.34        | 29.75        |
| 80-84                        | 25           | 56.00        | 28.87        | 67           | 44.18        | 27.31        | 99           | 53.54        | 27.68        | 191          | 51.24        | 27.95        |
| 85-89                        | 6            | 80.00        | 21.91        | 15           | 45.33        | 27.74        | 31           | 43.23        | 24.82        | 52           | 56.19        | 24.82        |
| 90-94                        | 3            | 13.33        | 23.09        | 2            | 40.00        | 56.57        | 7            | 60.00        | 23.09        | 12           | 37.78        | 34.25        |
| <b>Total</b>                 | <b>11271</b> | <b>60.16</b> | <b>30.18</b> | <b>17966</b> | <b>59.02</b> | <b>31.72</b> | <b>17045</b> | <b>61.10</b> | <b>28.04</b> | <b>46282</b> | <b>60.09</b> | <b>29.98</b> |

Table S5k. Sub-Saharan Africa Positive Experiences Index (2006, 2015, and 2024) – participant numbers, means, and standard deviations

| Sub-Saharan Africa |       |       |          |       |       |          |       |       |          |       |       |          |
|--------------------|-------|-------|----------|-------|-------|----------|-------|-------|----------|-------|-------|----------|
| Age                | 2006  |       |          | 2015  |       |          | 2024  |       |          | Total |       |          |
|                    | N.    | Mean  | St. dev. |
| 15-19              | 3381  | 70.91 | 29.67    | 4959  | 72.12 | 27.07    | 5054  | 72.68 | 26.49    | 13394 | 71.91 | 27.75    |
| 20-24              | 3752  | 68.84 | 29.86    | 4849  | 69.98 | 27.40    | 5888  | 70.93 | 27.48    | 14489 | 69.92 | 28.25    |
| 25-29              | 3806  | 68.06 | 30.22    | 5213  | 68.69 | 28.80    | 5470  | 70.56 | 27.83    | 14489 | 69.10 | 28.95    |
| 30-34              | 2722  | 67.11 | 30.17    | 4044  | 67.66 | 28.97    | 4578  | 69.26 | 28.57    | 11344 | 68.01 | 29.24    |
| 35-39              | 2321  | 67.57 | 29.84    | 3356  | 66.51 | 28.60    | 3718  | 68.86 | 28.71    | 9395  | 67.65 | 29.05    |
| 40-44              | 1744  | 68.08 | 30.22    | 2327  | 65.16 | 29.02    | 3023  | 67.84 | 28.58    | 7094  | 67.03 | 29.27    |
| 45-49              | 1339  | 66.32 | 30.15    | 1920  | 65.26 | 28.85    | 2208  | 68.61 | 28.07    | 5467  | 66.73 | 29.03    |
| 50-54              | 1016  | 65.91 | 30.70    | 1561  | 65.97 | 28.05    | 1772  | 68.83 | 28.34    | 4349  | 66.90 | 29.03    |
| 55-59              | 710   | 65.92 | 29.65    | 1101  | 66.47 | 28.21    | 1174  | 68.36 | 28.26    | 2985  | 66.92 | 28.71    |
| 60-64              | 587   | 64.67 | 30.16    | 997   | 64.85 | 28.18    | 1147  | 68.67 | 27.14    | 2731  | 66.06 | 28.49    |
| 65-69              | 378   | 66.46 | 29.97    | 639   | 64.07 | 28.94    | 855   | 67.13 | 27.38    | 1872  | 65.89 | 28.76    |
| 70-74              | 322   | 64.91 | 30.36    | 447   | 63.53 | 27.20    | 590   | 66.27 | 28.77    | 1359  | 64.90 | 28.78    |
| 75-79              | 174   | 62.41 | 31.91    | 247   | 59.43 | 30.94    | 293   | 67.30 | 27.79    | 714   | 63.05 | 30.22    |
| 80-84              | 97    | 62.68 | 31.84    | 165   | 61.58 | 26.87    | 180   | 64.67 | 26.92    | 442   | 62.97 | 28.54    |
| 85-89              | 28    | 52.14 | 36.25    | 69    | 53.62 | 27.33    | 67    | 70.75 | 27.26    | 164   | 58.84 | 30.28    |
| 90-94              | 10    | 36.00 | 20.66    | 25    | 56.80 | 31.98    | 32    | 61.88 | 28.45    | 67    | 51.56 | 27.03    |
| <b>Total</b>       | 22387 | 63.62 | 30.10    | 31919 | 64.48 | 28.53    | 36049 | 68.29 | 27.88    | 90355 | 65.46 | 28.84    |

**Figures S1-11. Change in regional Cantril means from 2006, 2015, and 2024**

**Figures S1a-c. EU Cantril means in 2006, 2015, and 2024**

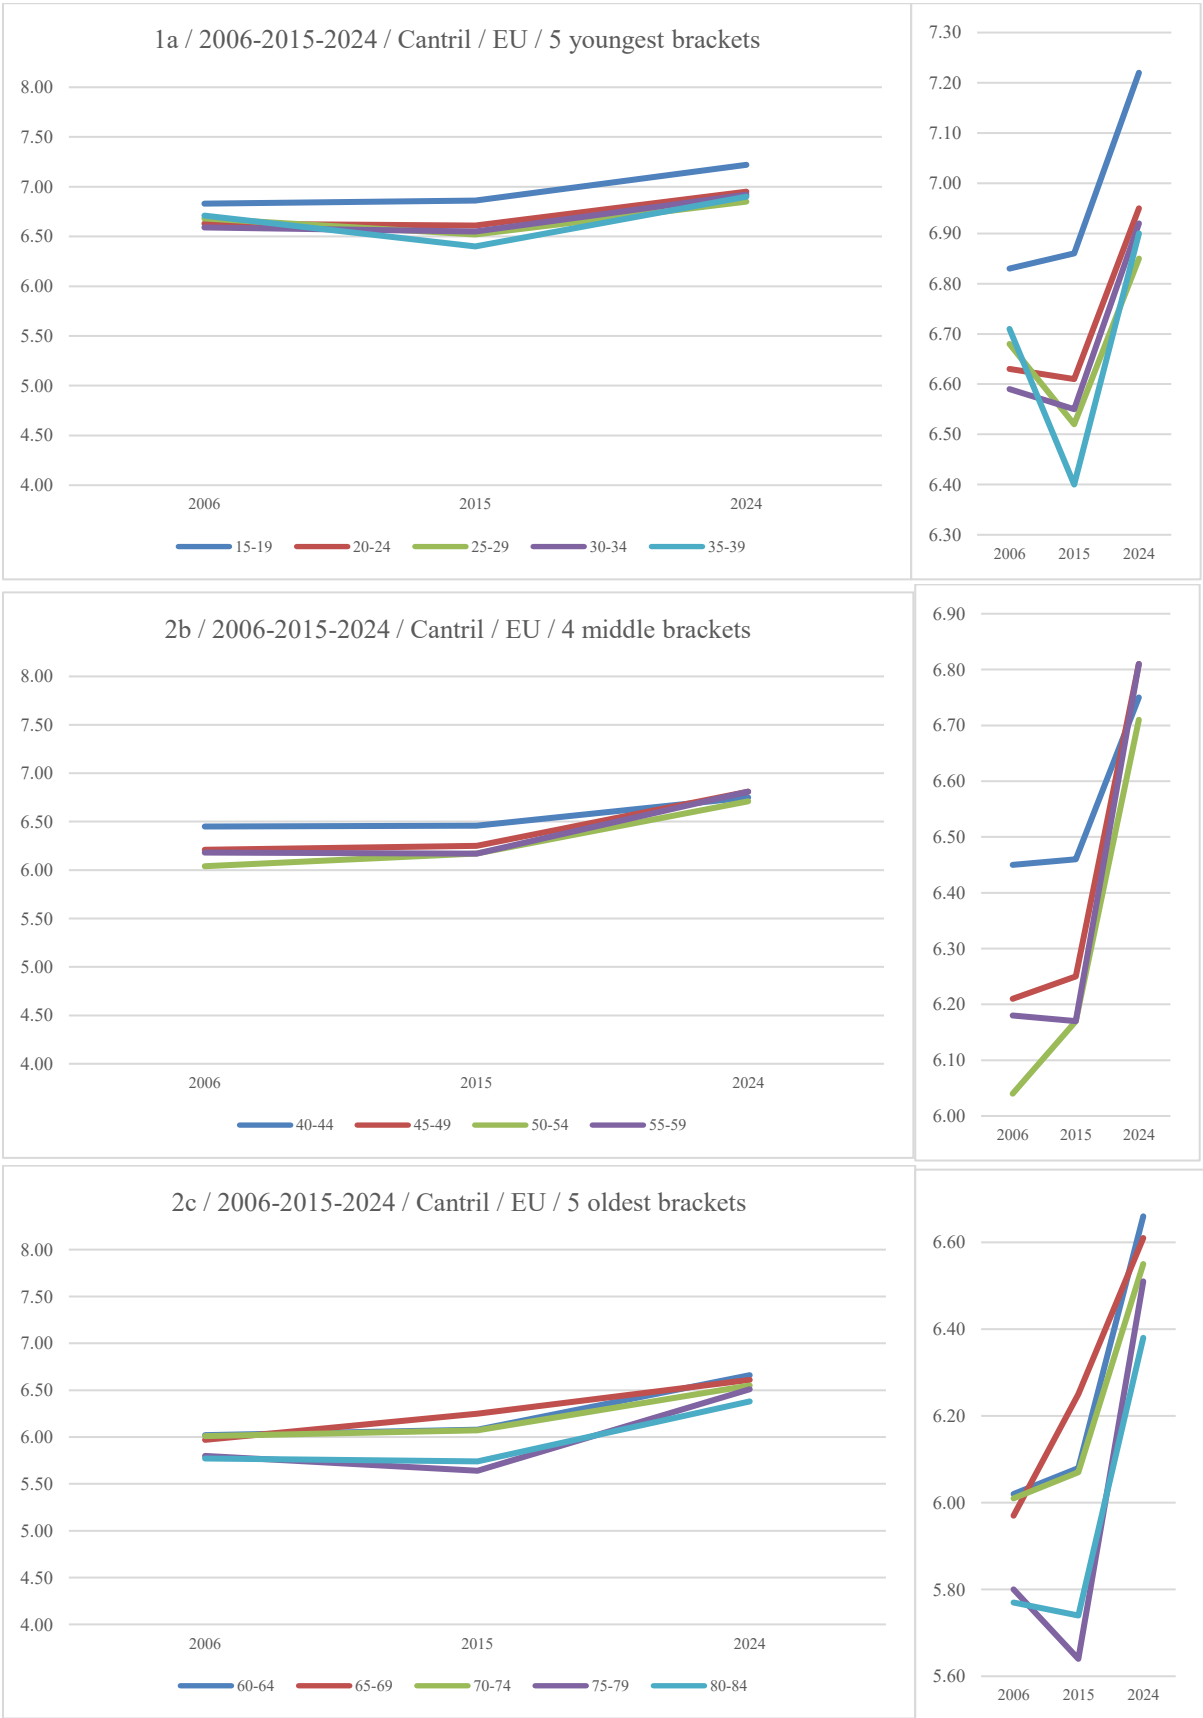

Figures S2a-c. Europe other Cantril means in 2006, 2015, and 2024

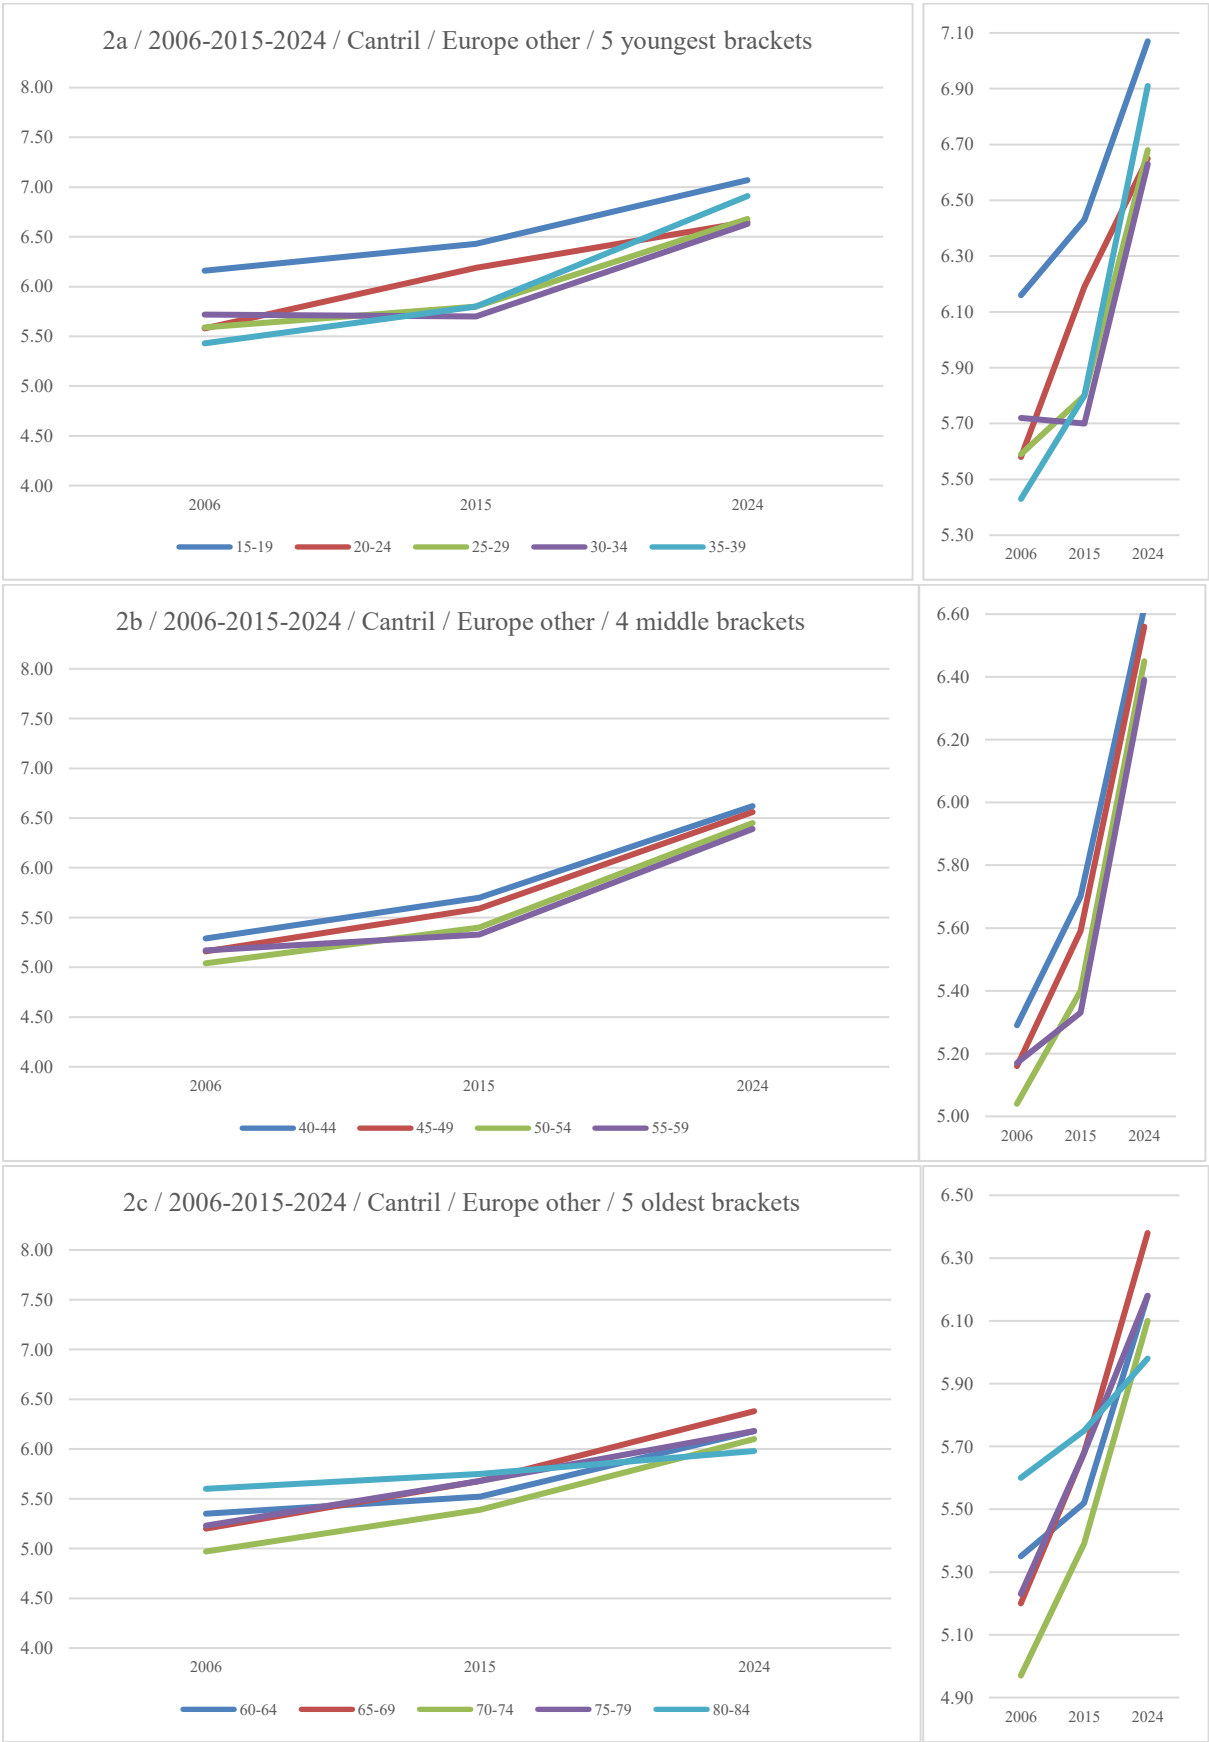

Figures S3a-c. Independent states Cantril means in 2006, 2015, and 2024

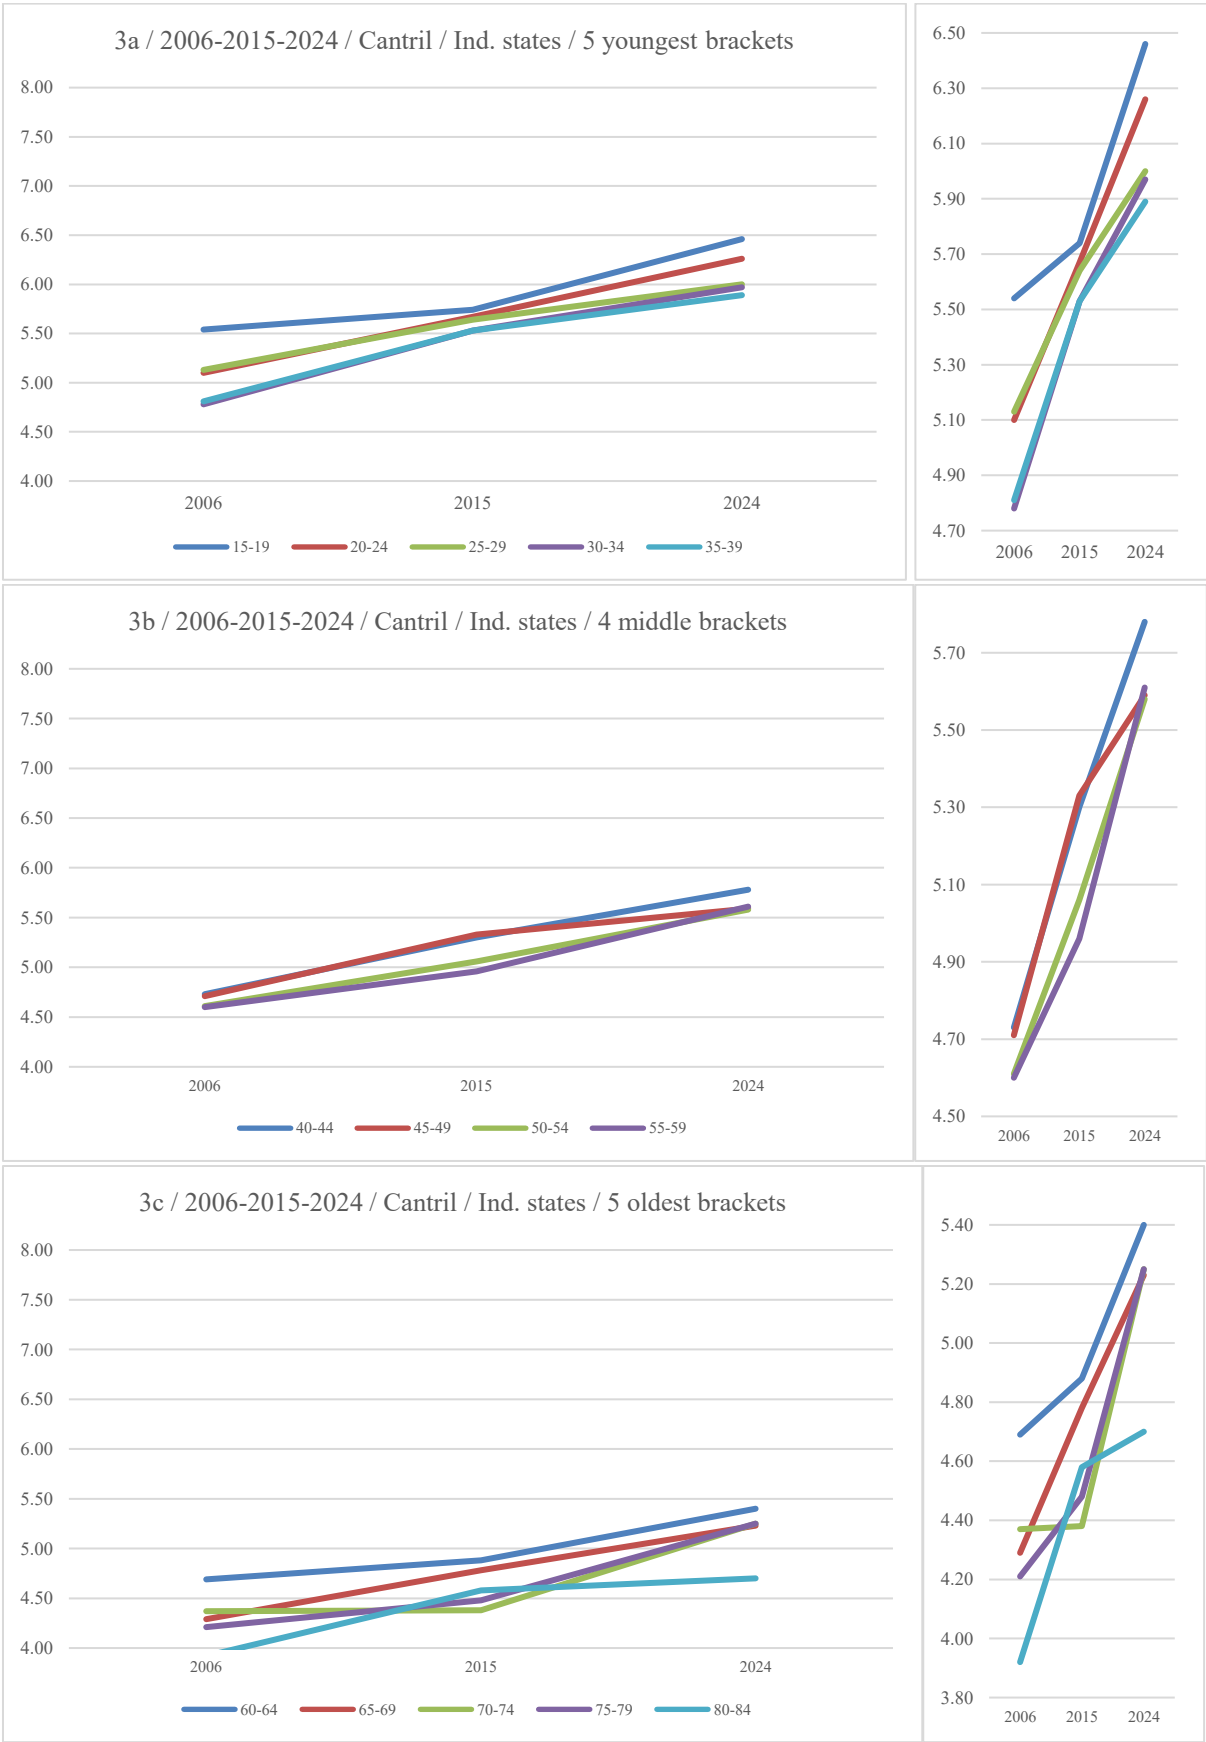

Figures S4a-c. Australia and New Zealand Cantril means in 2006, 2015, and 2024

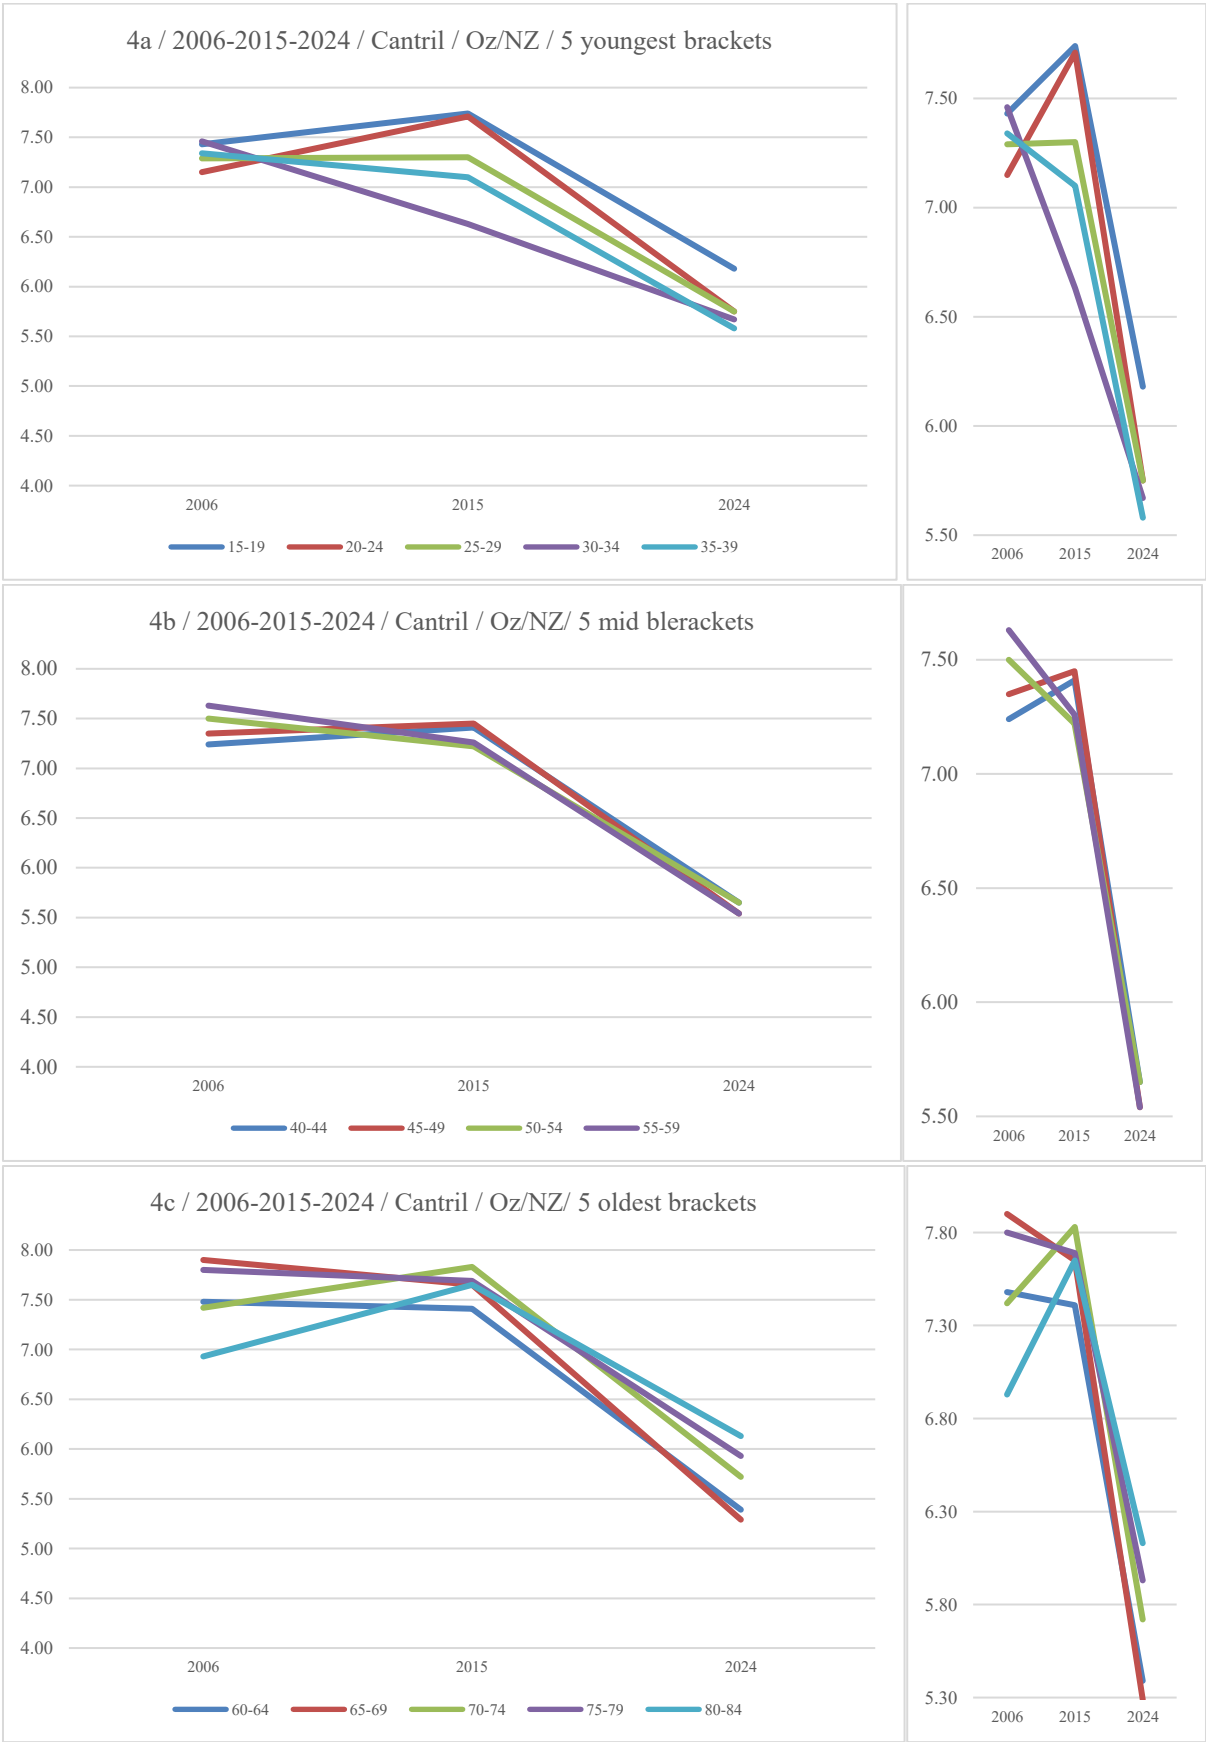

Figures S5a-c. South East Asia Cantril means in 2006, 2015, and 2024

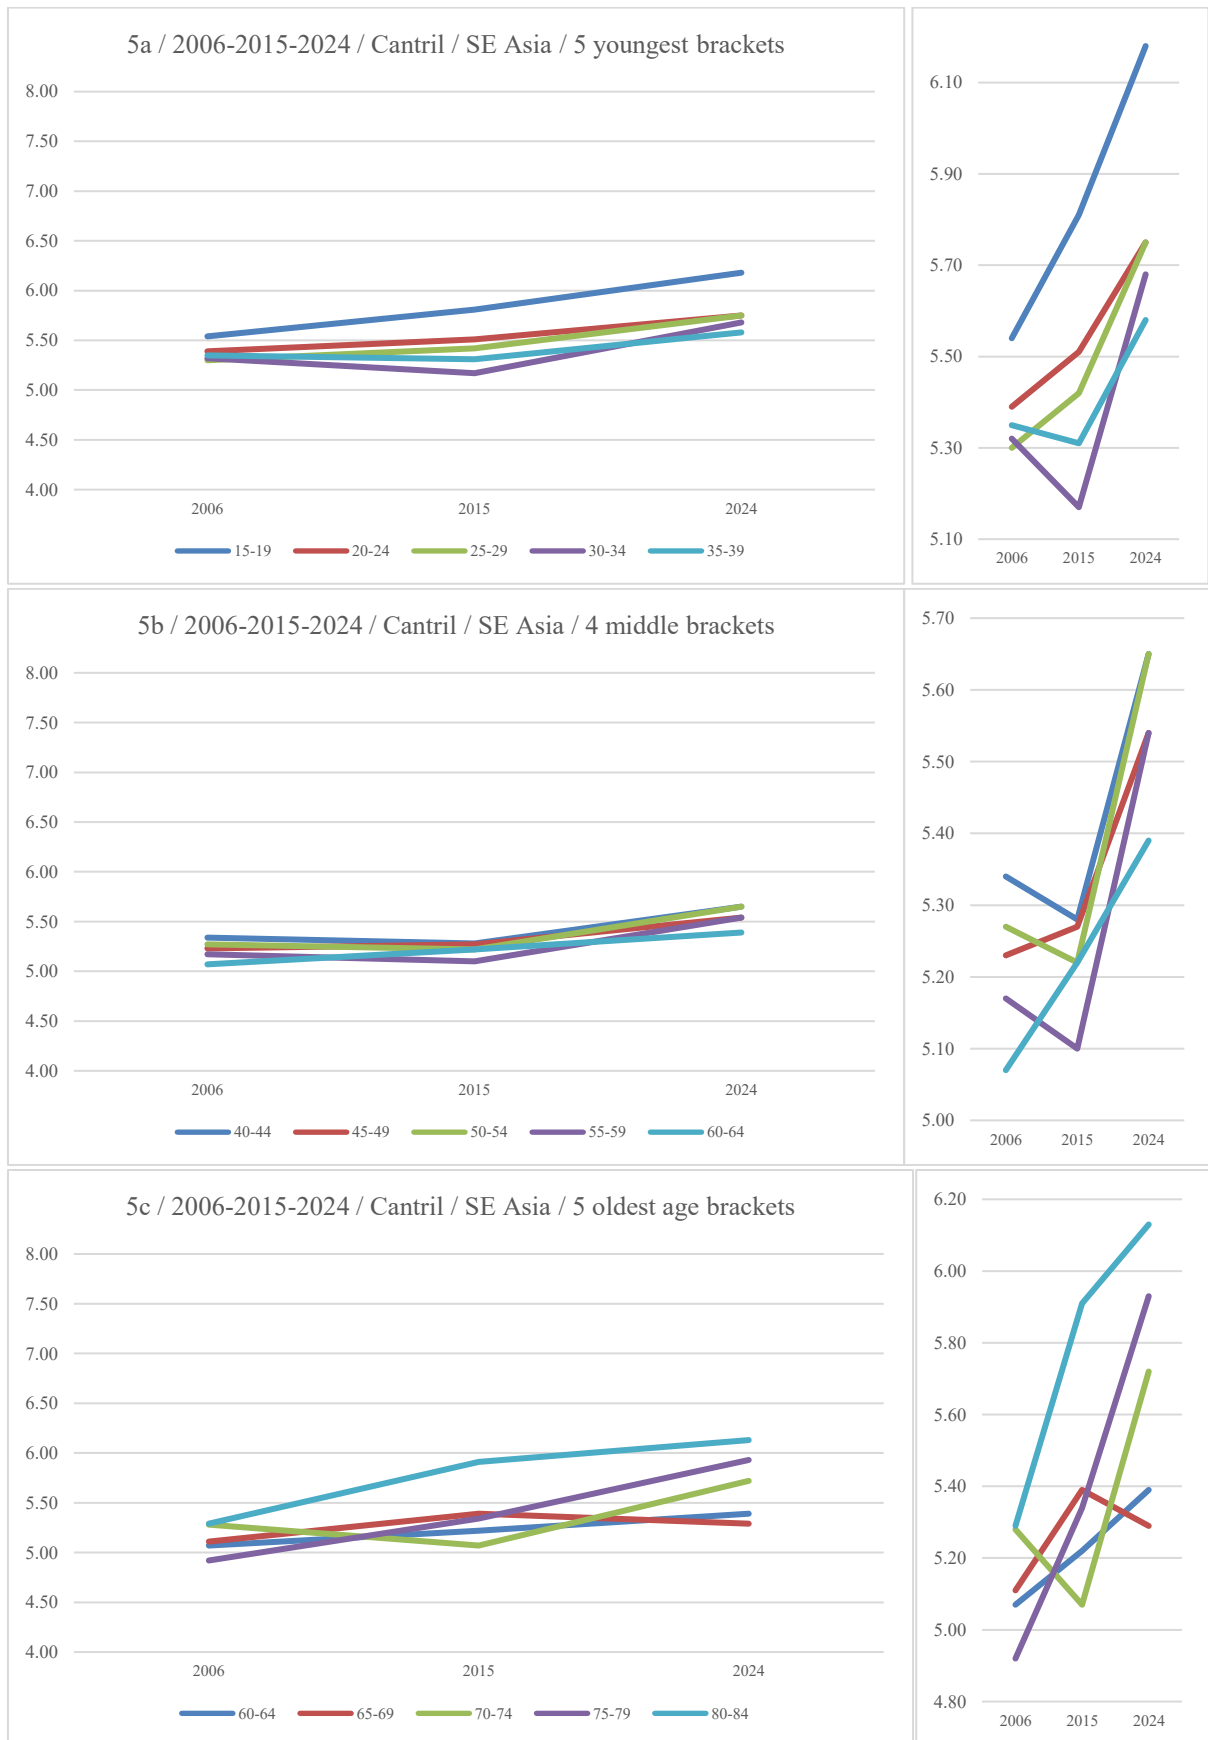

Figures S6a-c. South Asia Cantril means in 2006, 2015, and 2024

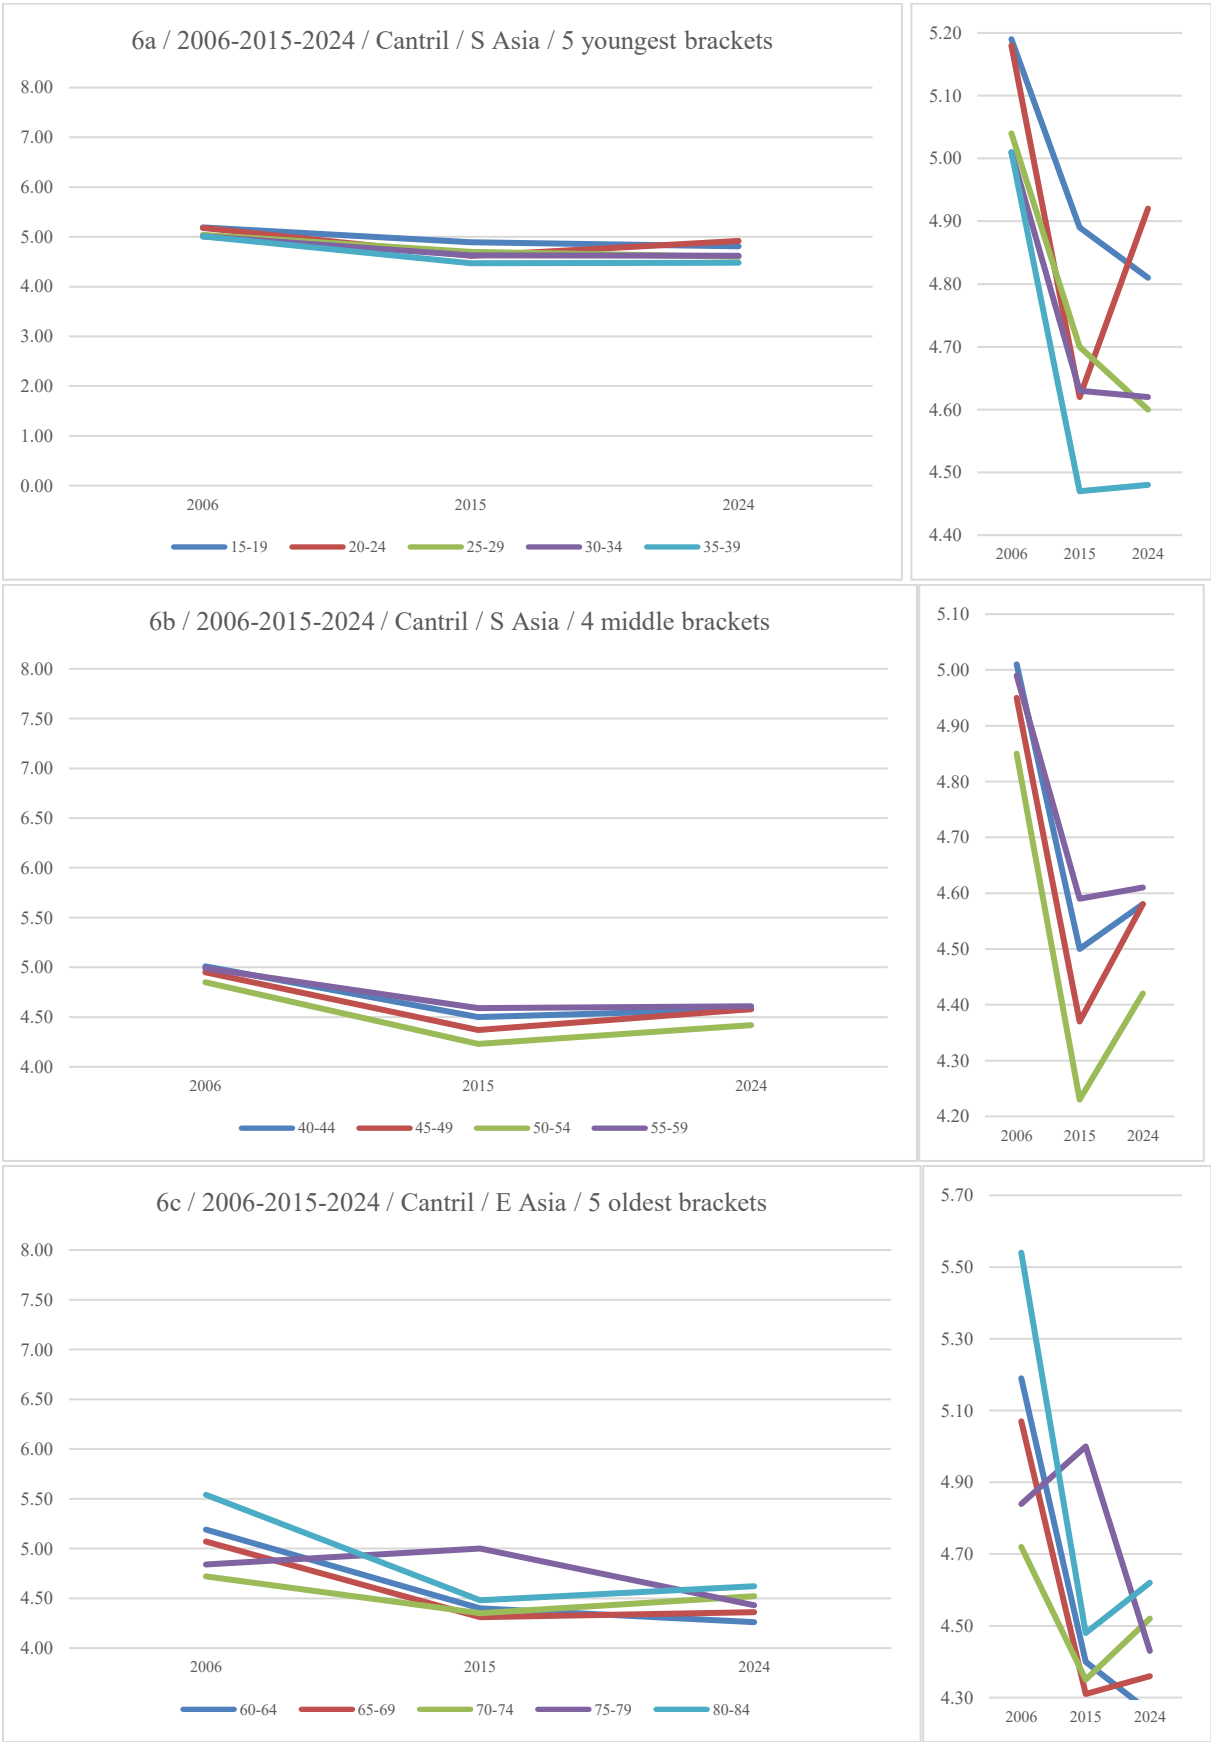

Figures S7a-c. East Asia Cantril means in 2006, 2015, and 2024

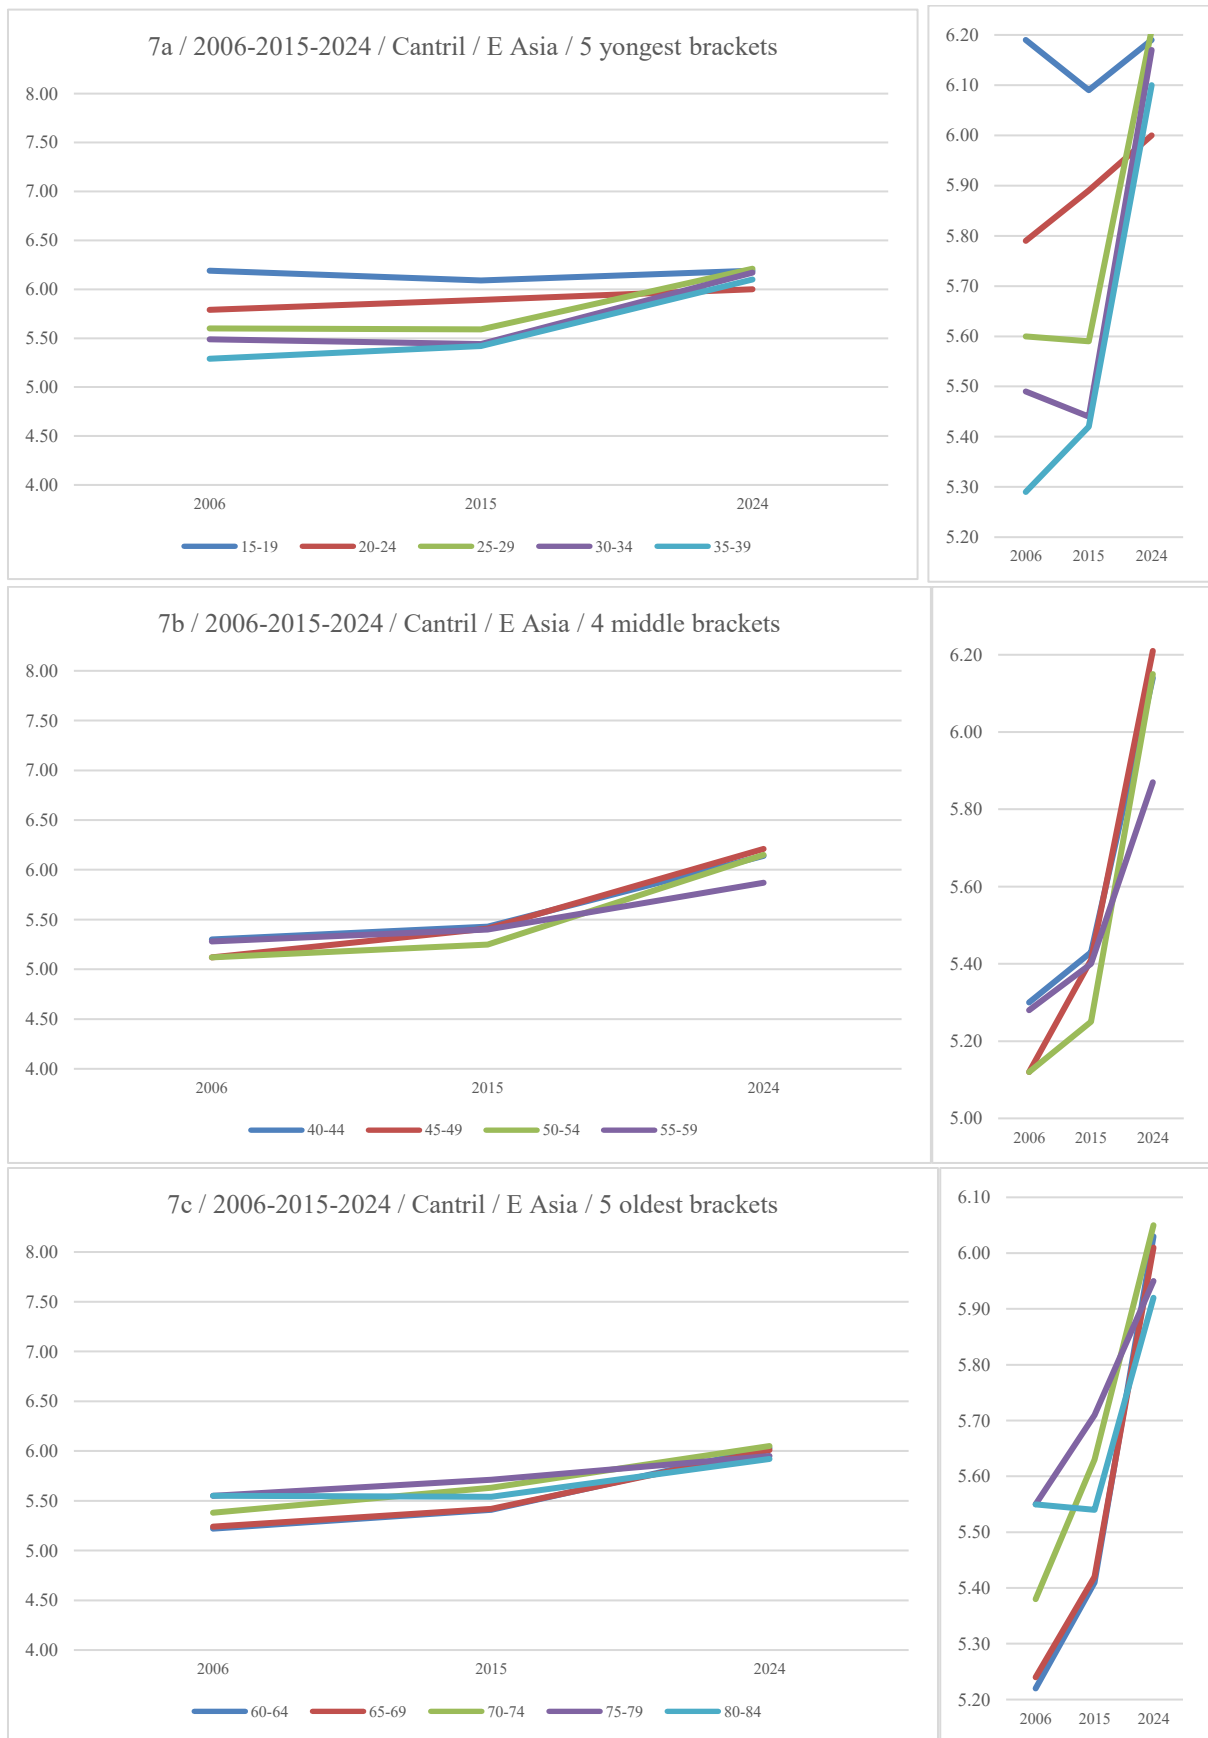

Figures S8a-c. Latin America Cantril means in 2006, 2015, and 2024

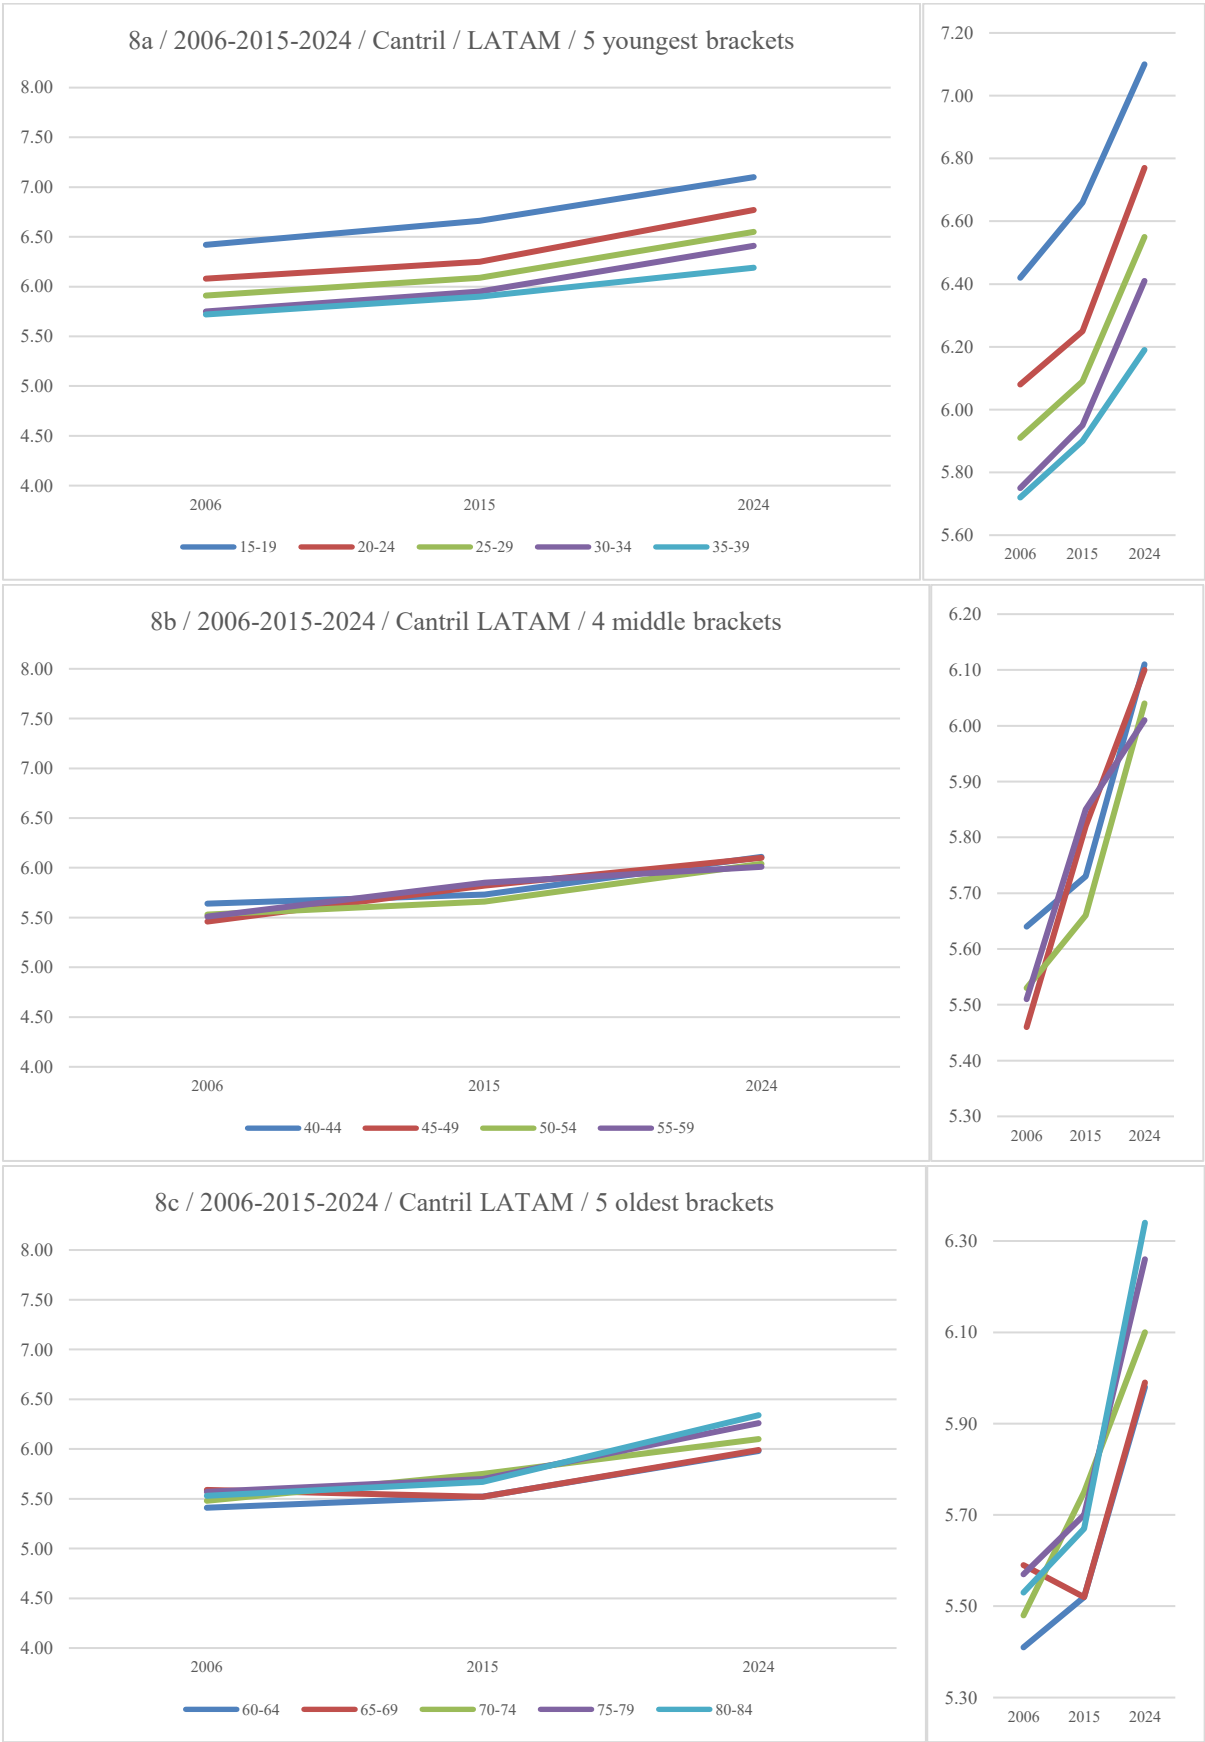

Figures S9a-c. North America Cantril means in 2006, 2015, and 2024

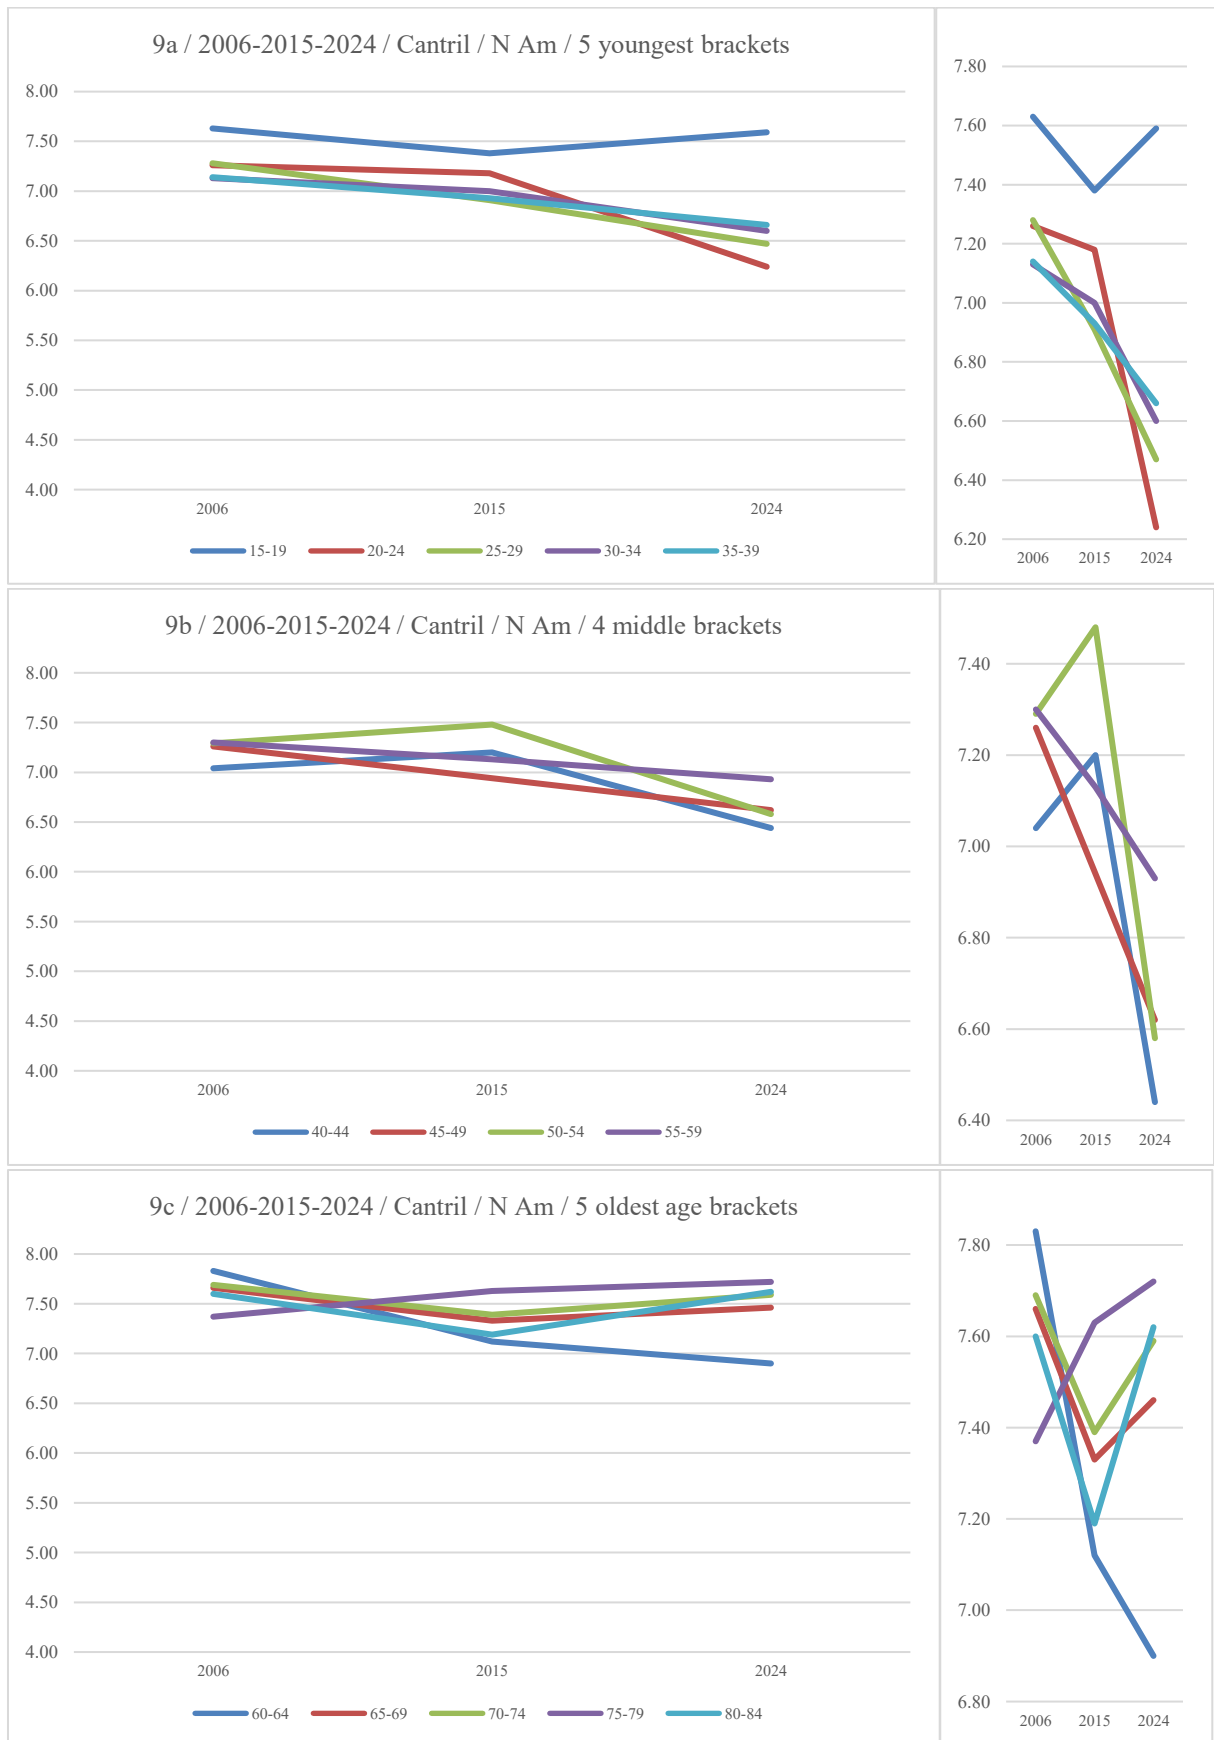

Figures S10a-c. Middle East and North Africa Cantril means in 2006, 2015, and 2024

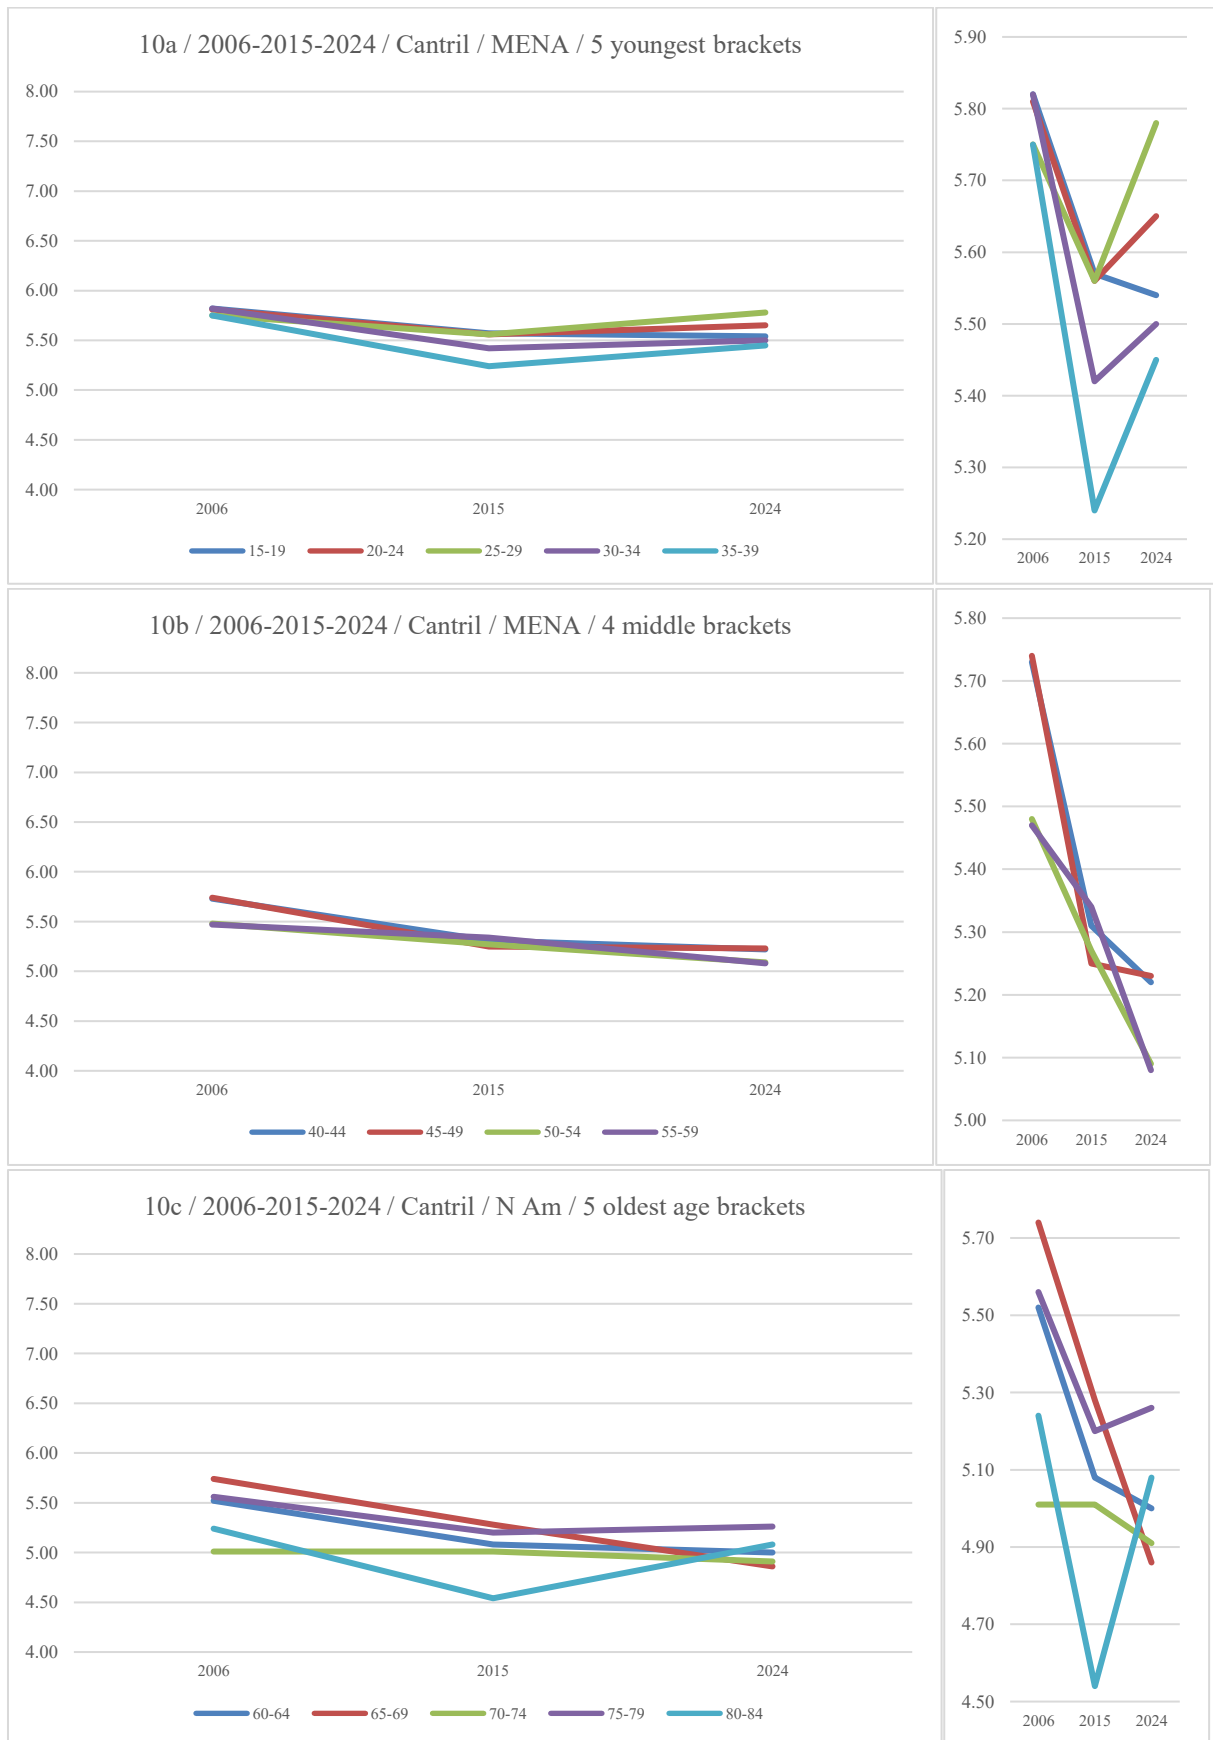

Figures S11a-c. Sub-Saharan Africa Cantril means in 2006, 2015, and 2024

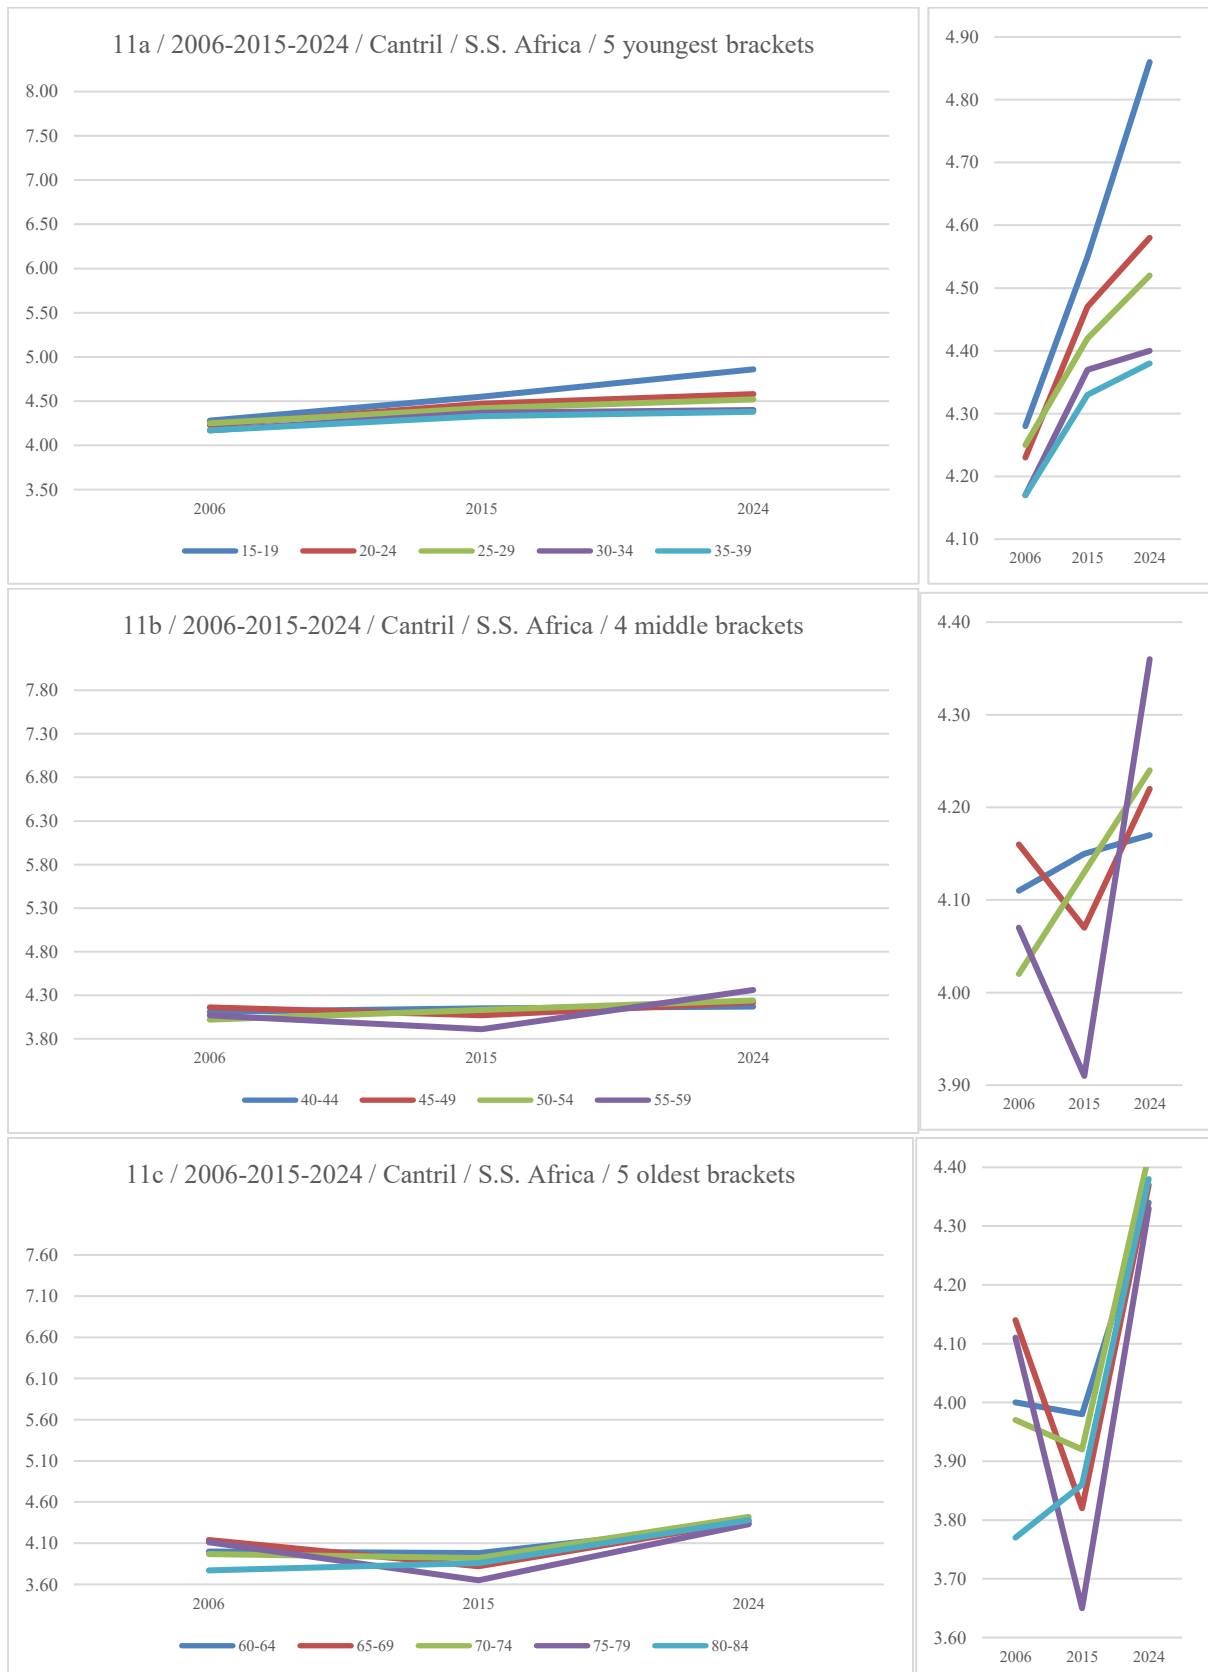

**Figures S12-22. Regional Cantril means in 2006, 2015, and 2024**

**Figures S12a-c. EU Cantril means in 2006, 2015, and 2024**

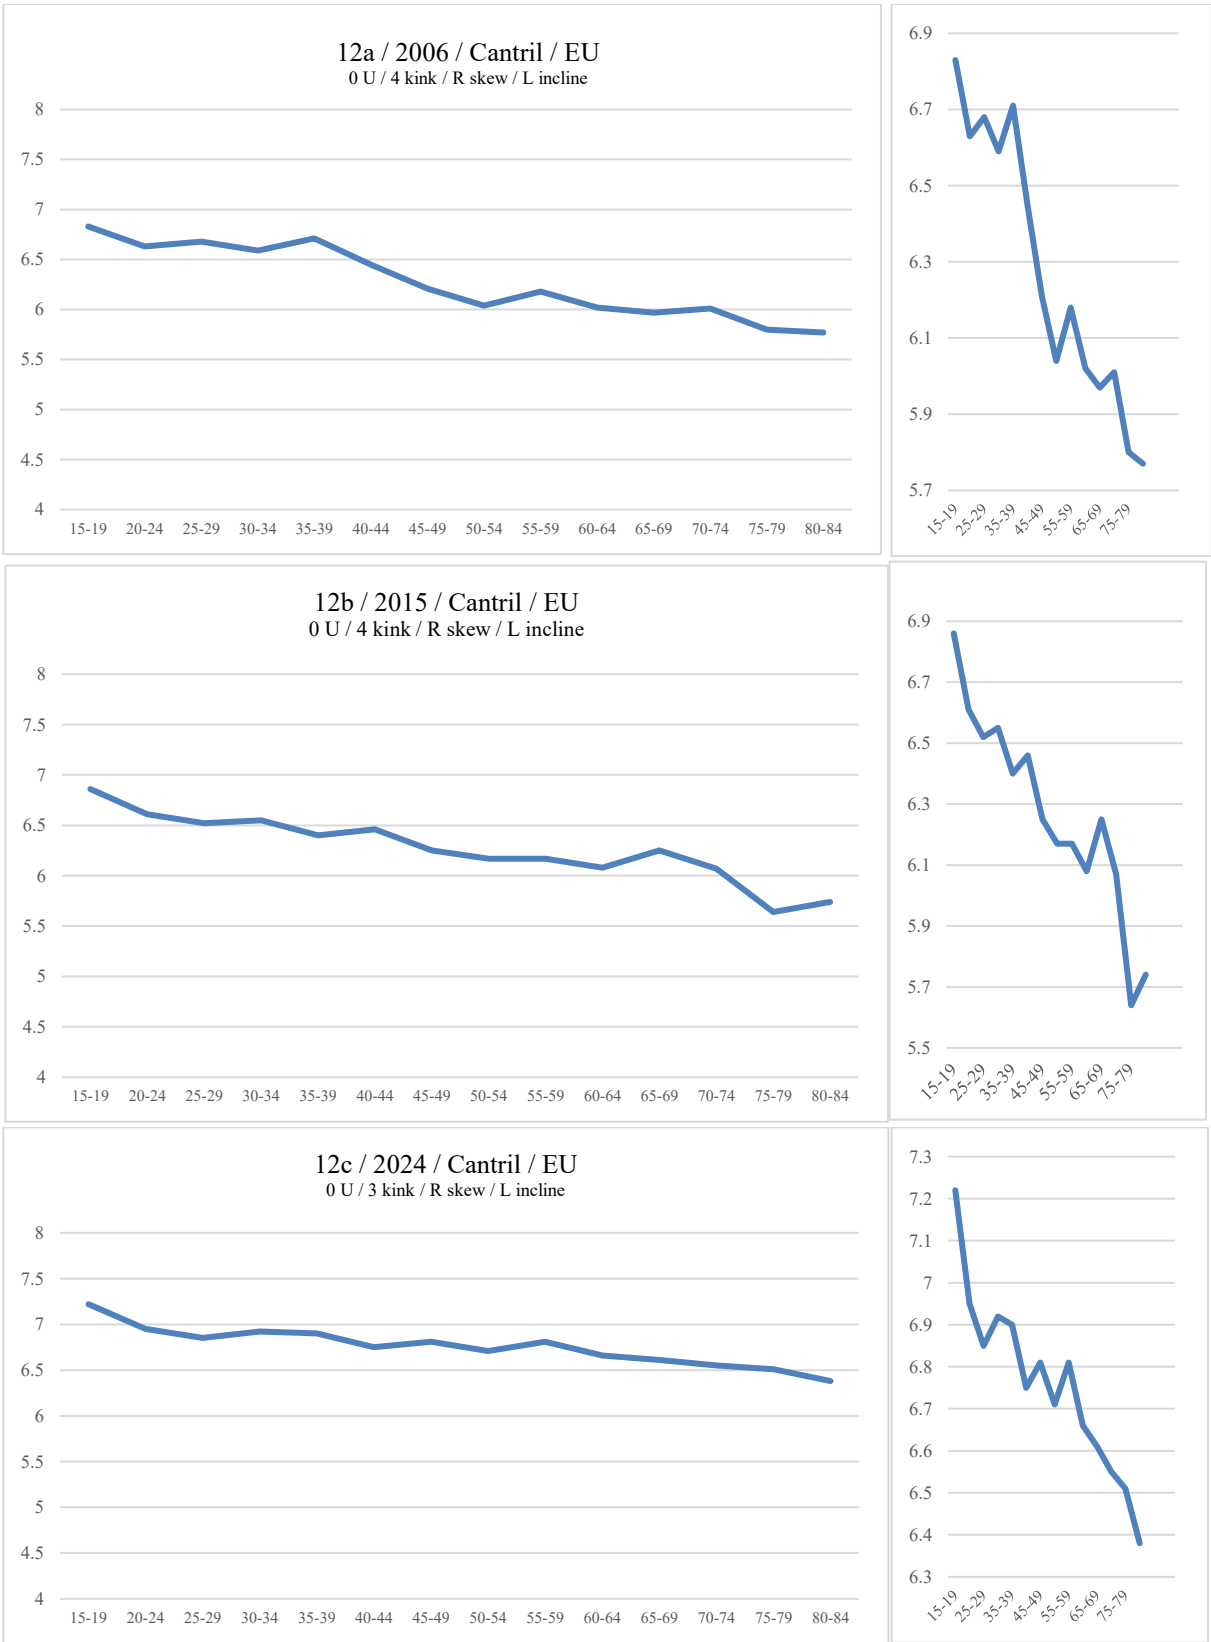

Figures S13a-c. Europe Other Cantril means in 2006, 2015, and 2024

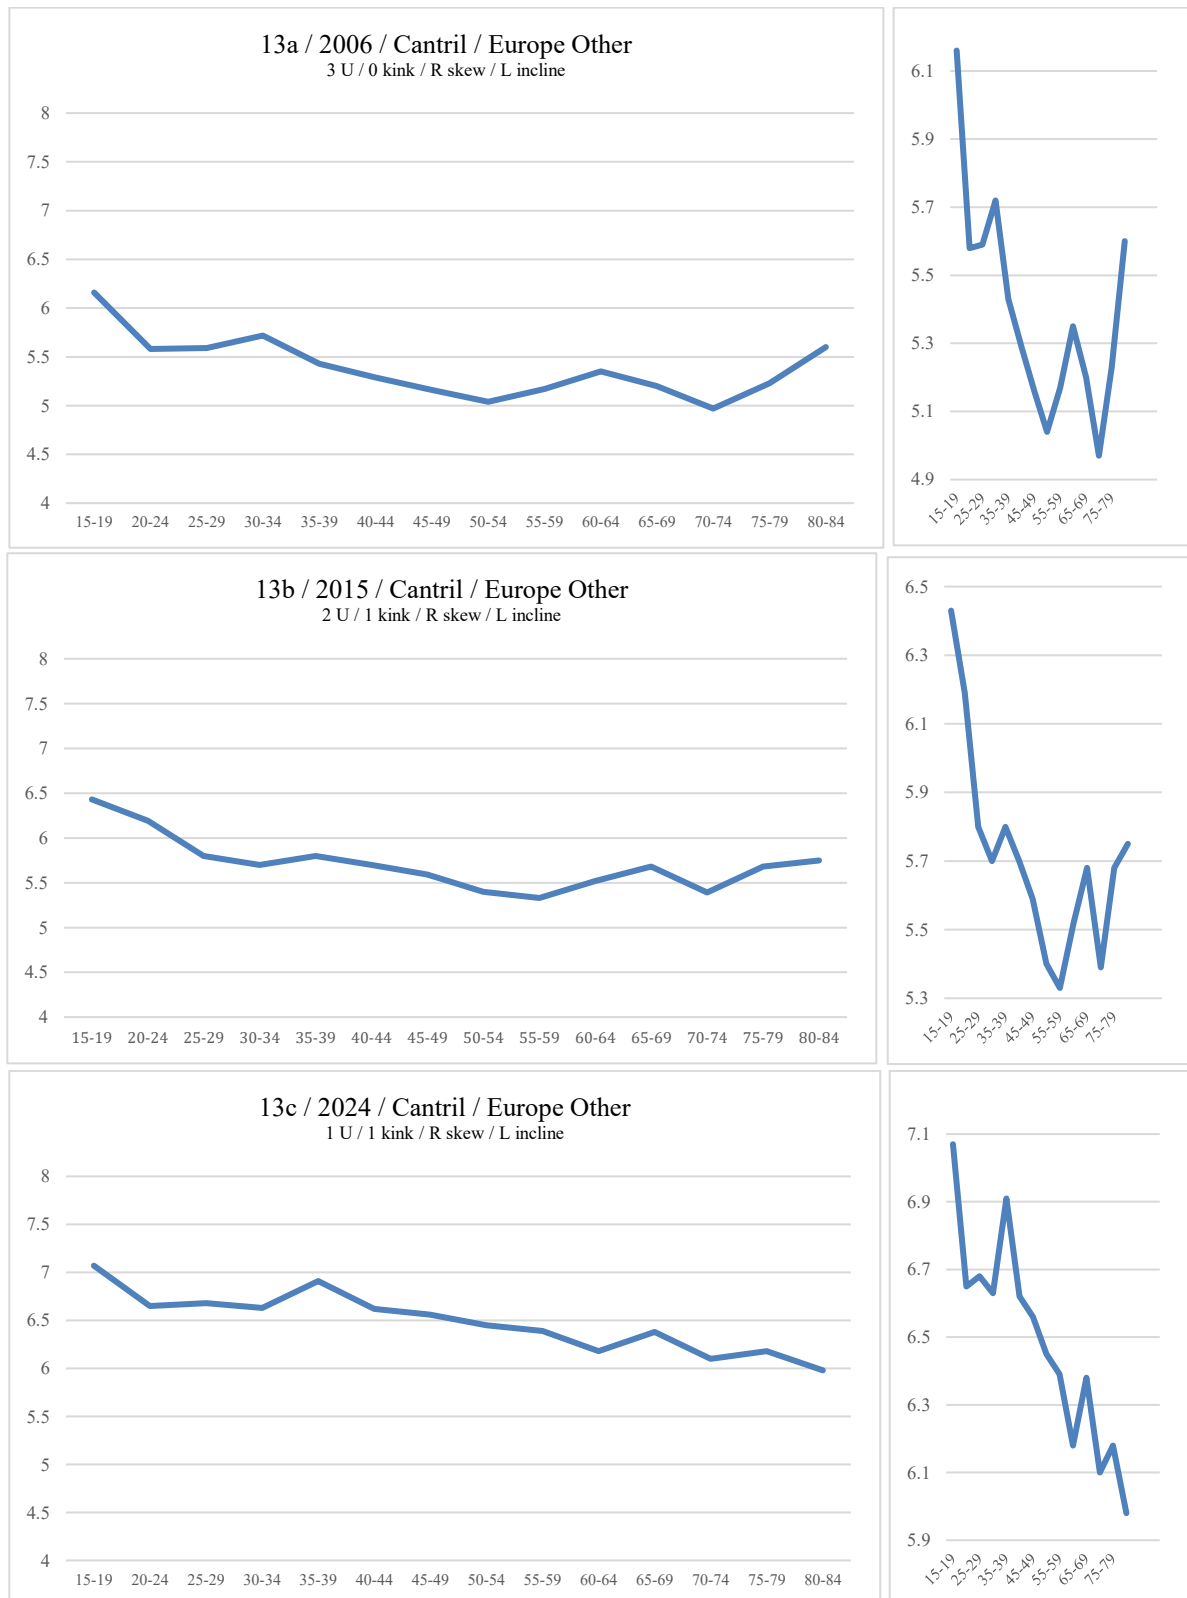

Figures S14a-c. Independent States Cantril means in 2006, 2015, and 2024

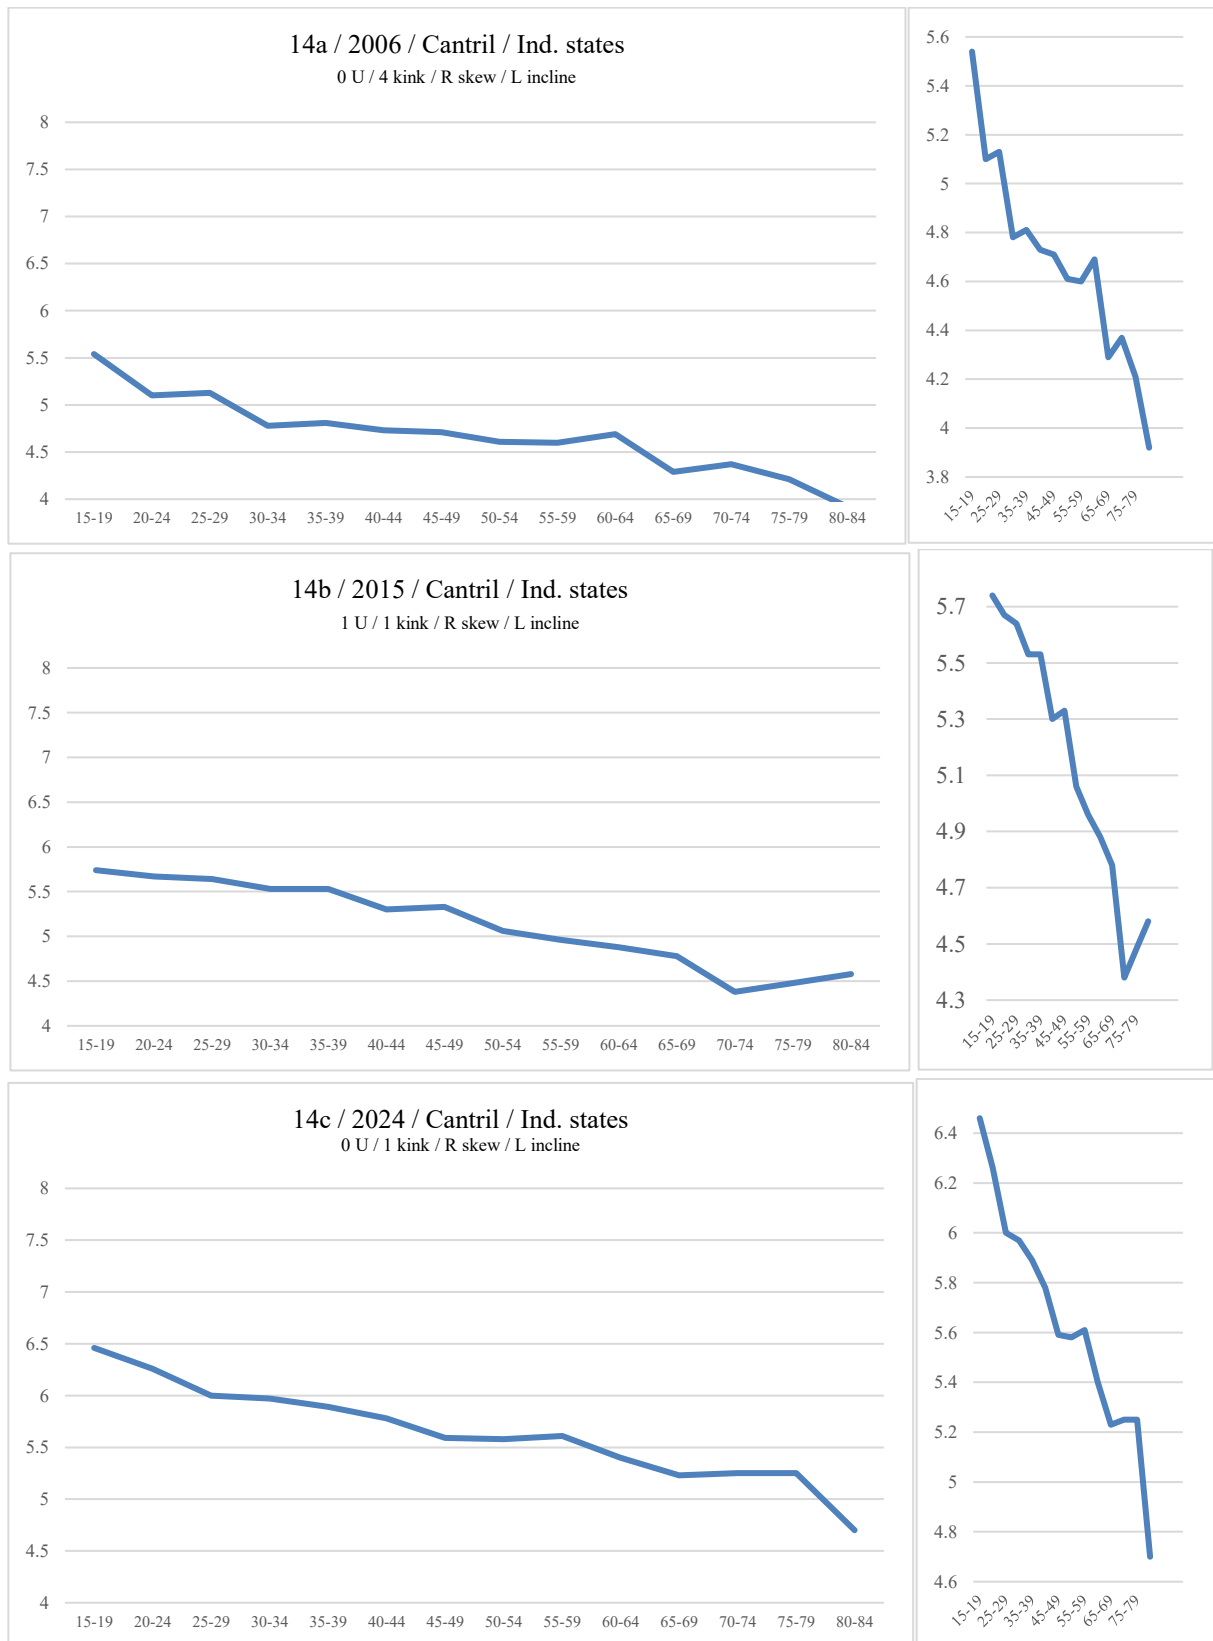

Figures S15a-c. Oz/NZ Cantril means in 2006, 2015, and 2024

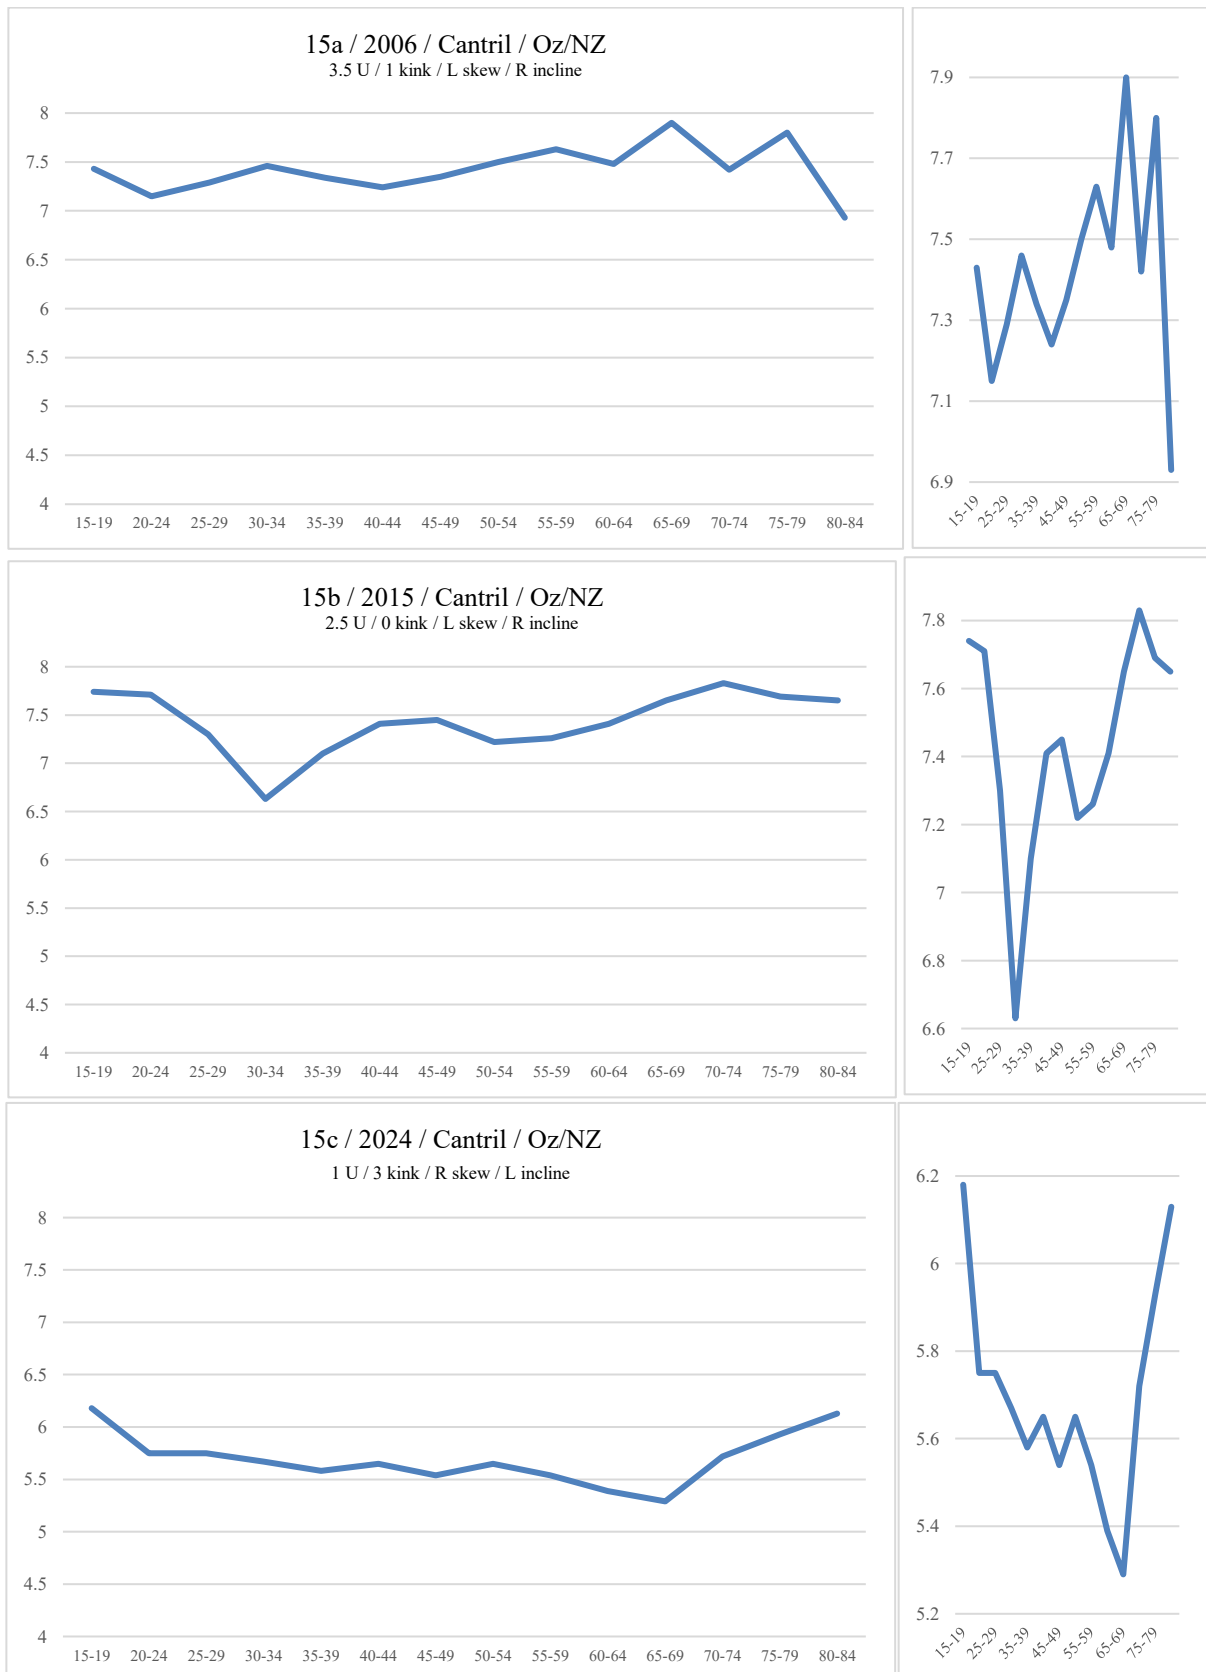

Figures S16a-c. South East Asia Cantril means in 2006, 2015, and 2024

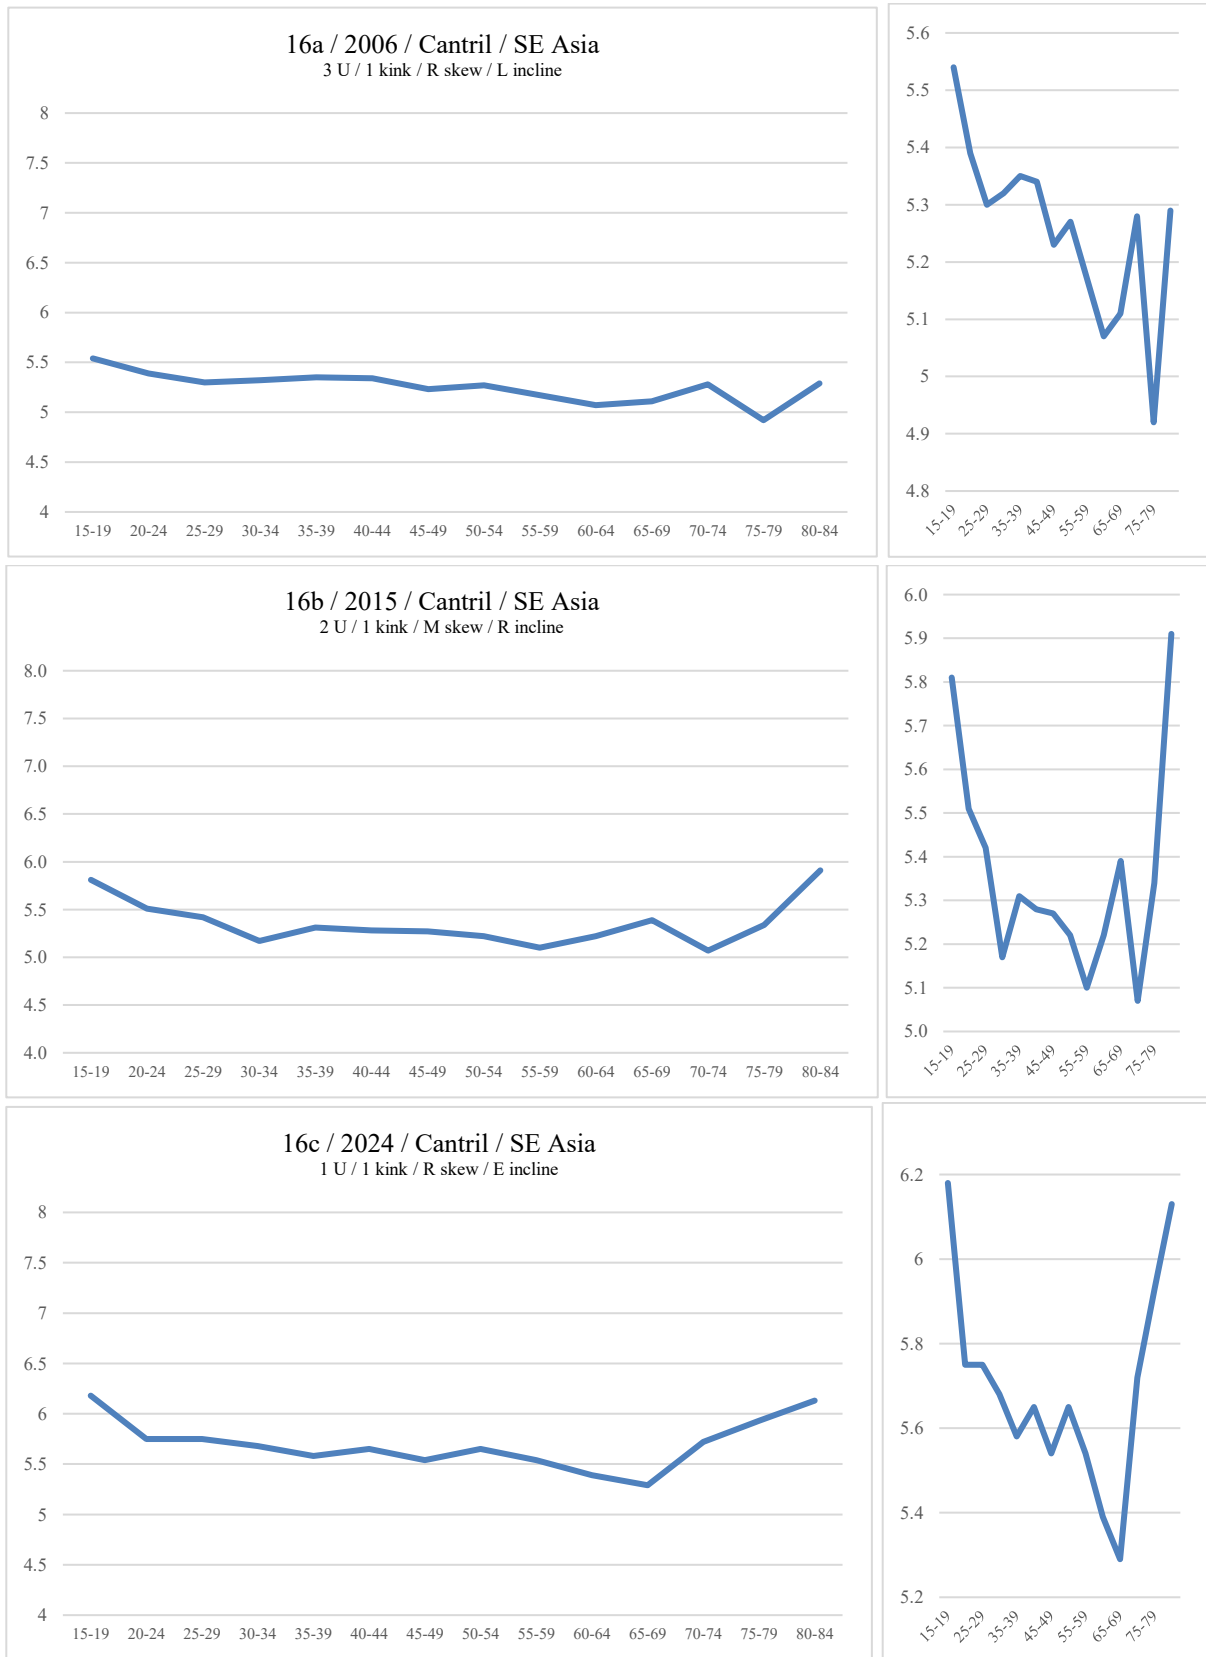

Figures S17a-c. South Asia Cantril means in 2006, 2015, and 2024

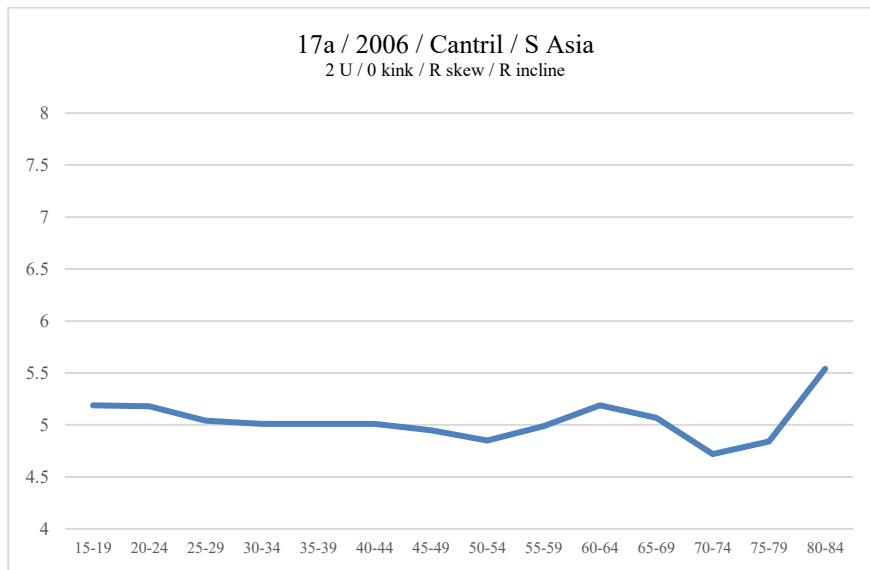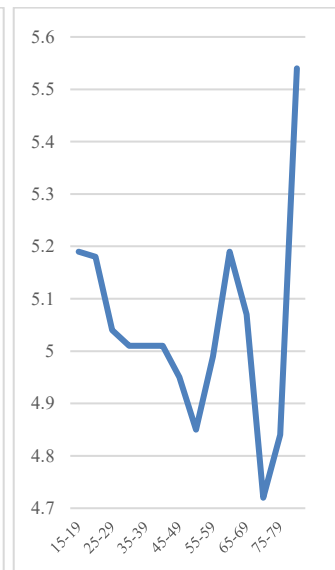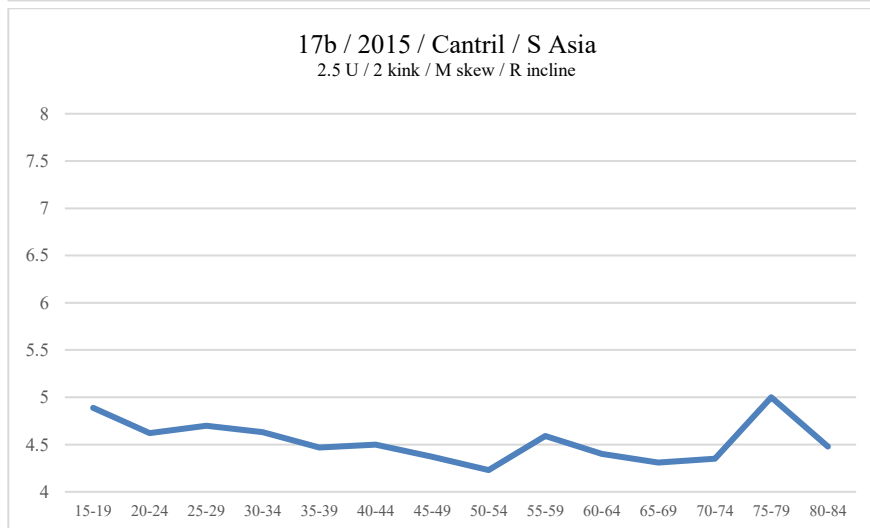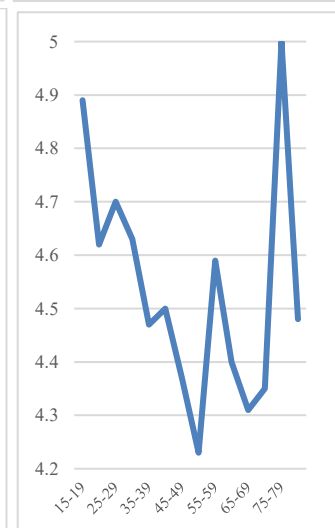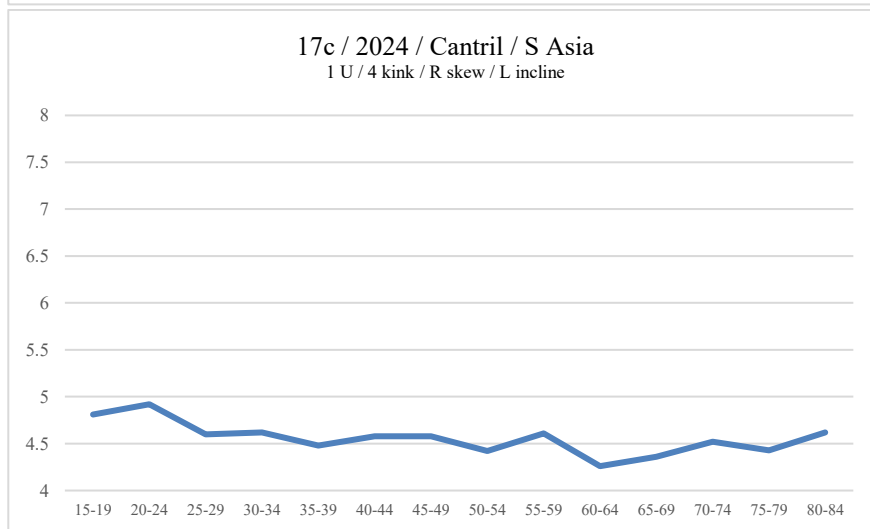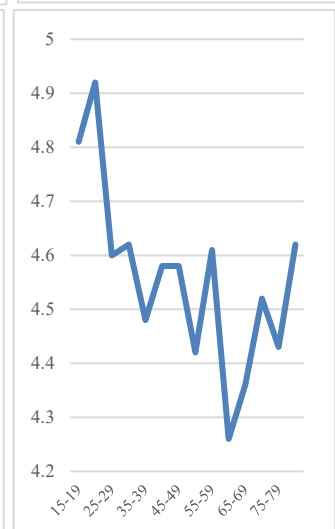

Figures S18a-c. East Asia Cantril means in 2006, 2015, and 2024

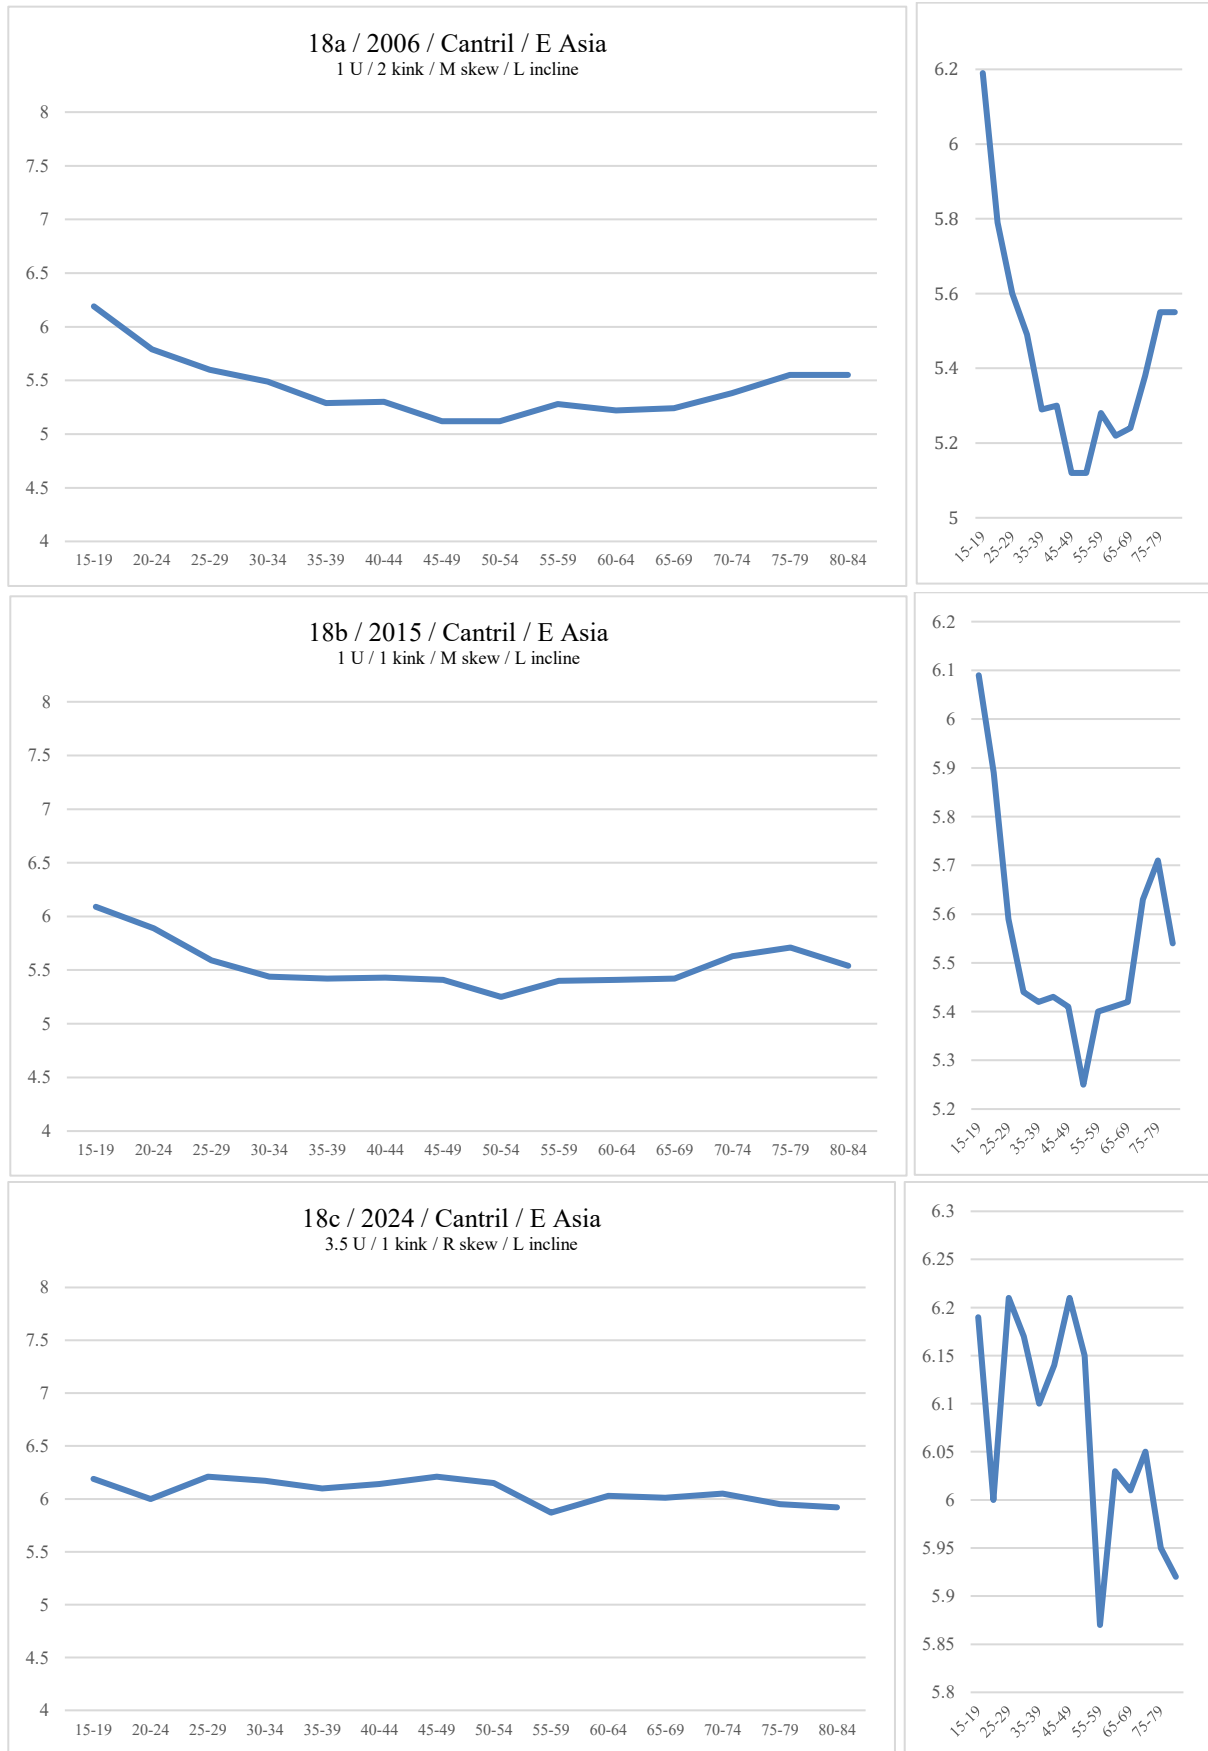

Figures S19a-c. Latin America Cantril means in 2006, 2015, and 2024

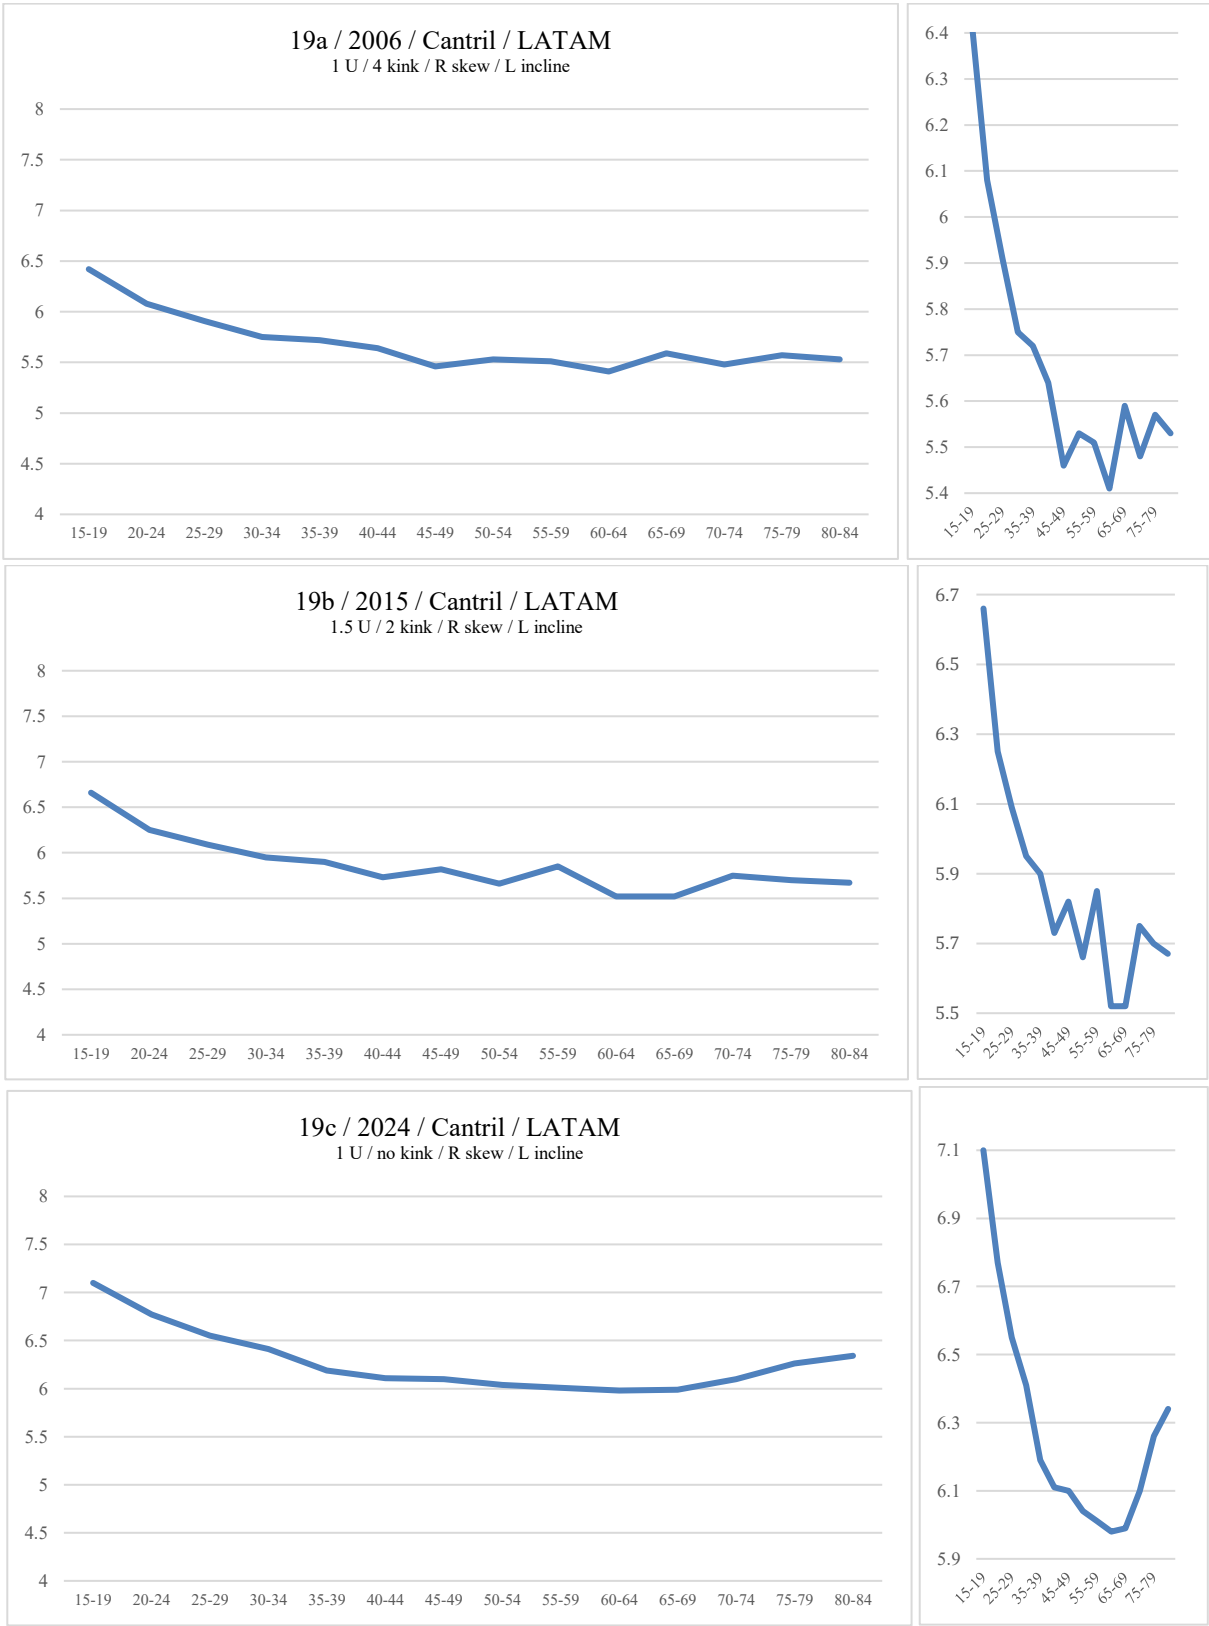

Figures S20a-c. North America Cantril means in 2006, 2015, and 2024

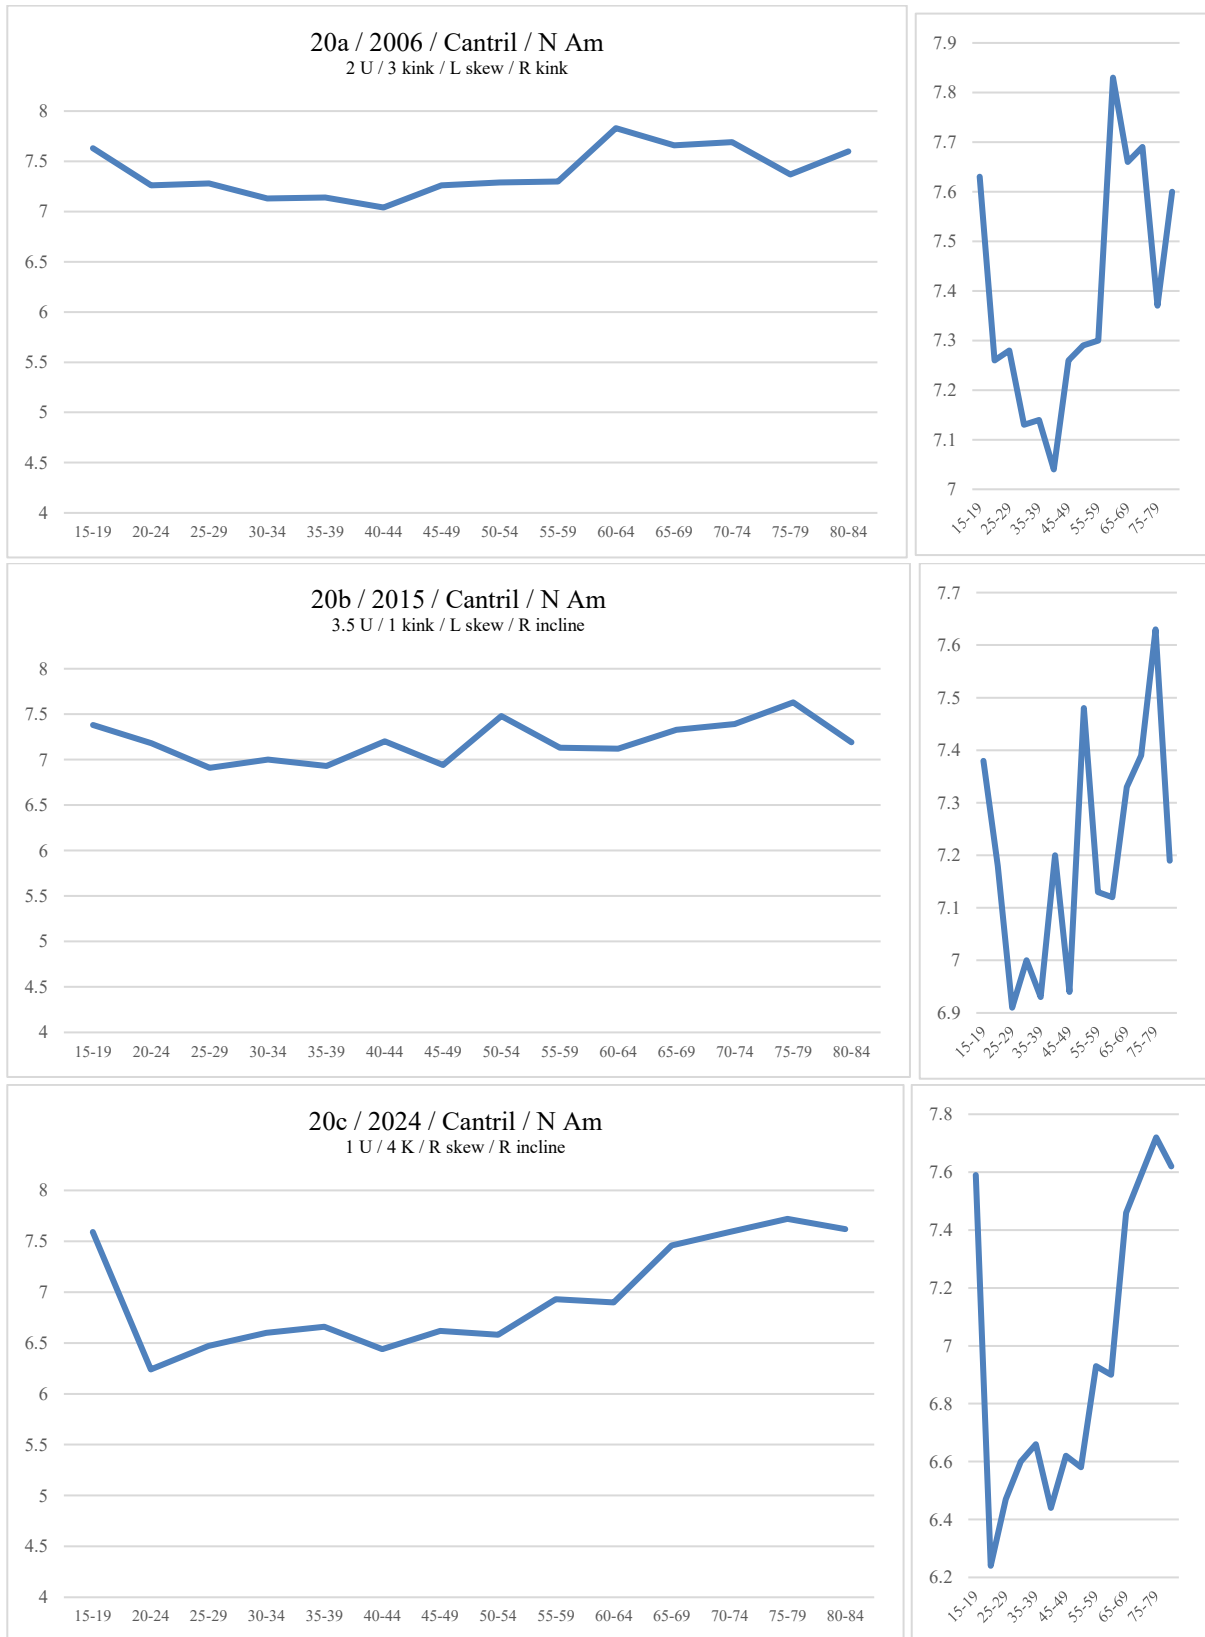

Figures S21a-c. Middle East and North Africa Cantril means in 2006, 2015, and 2024

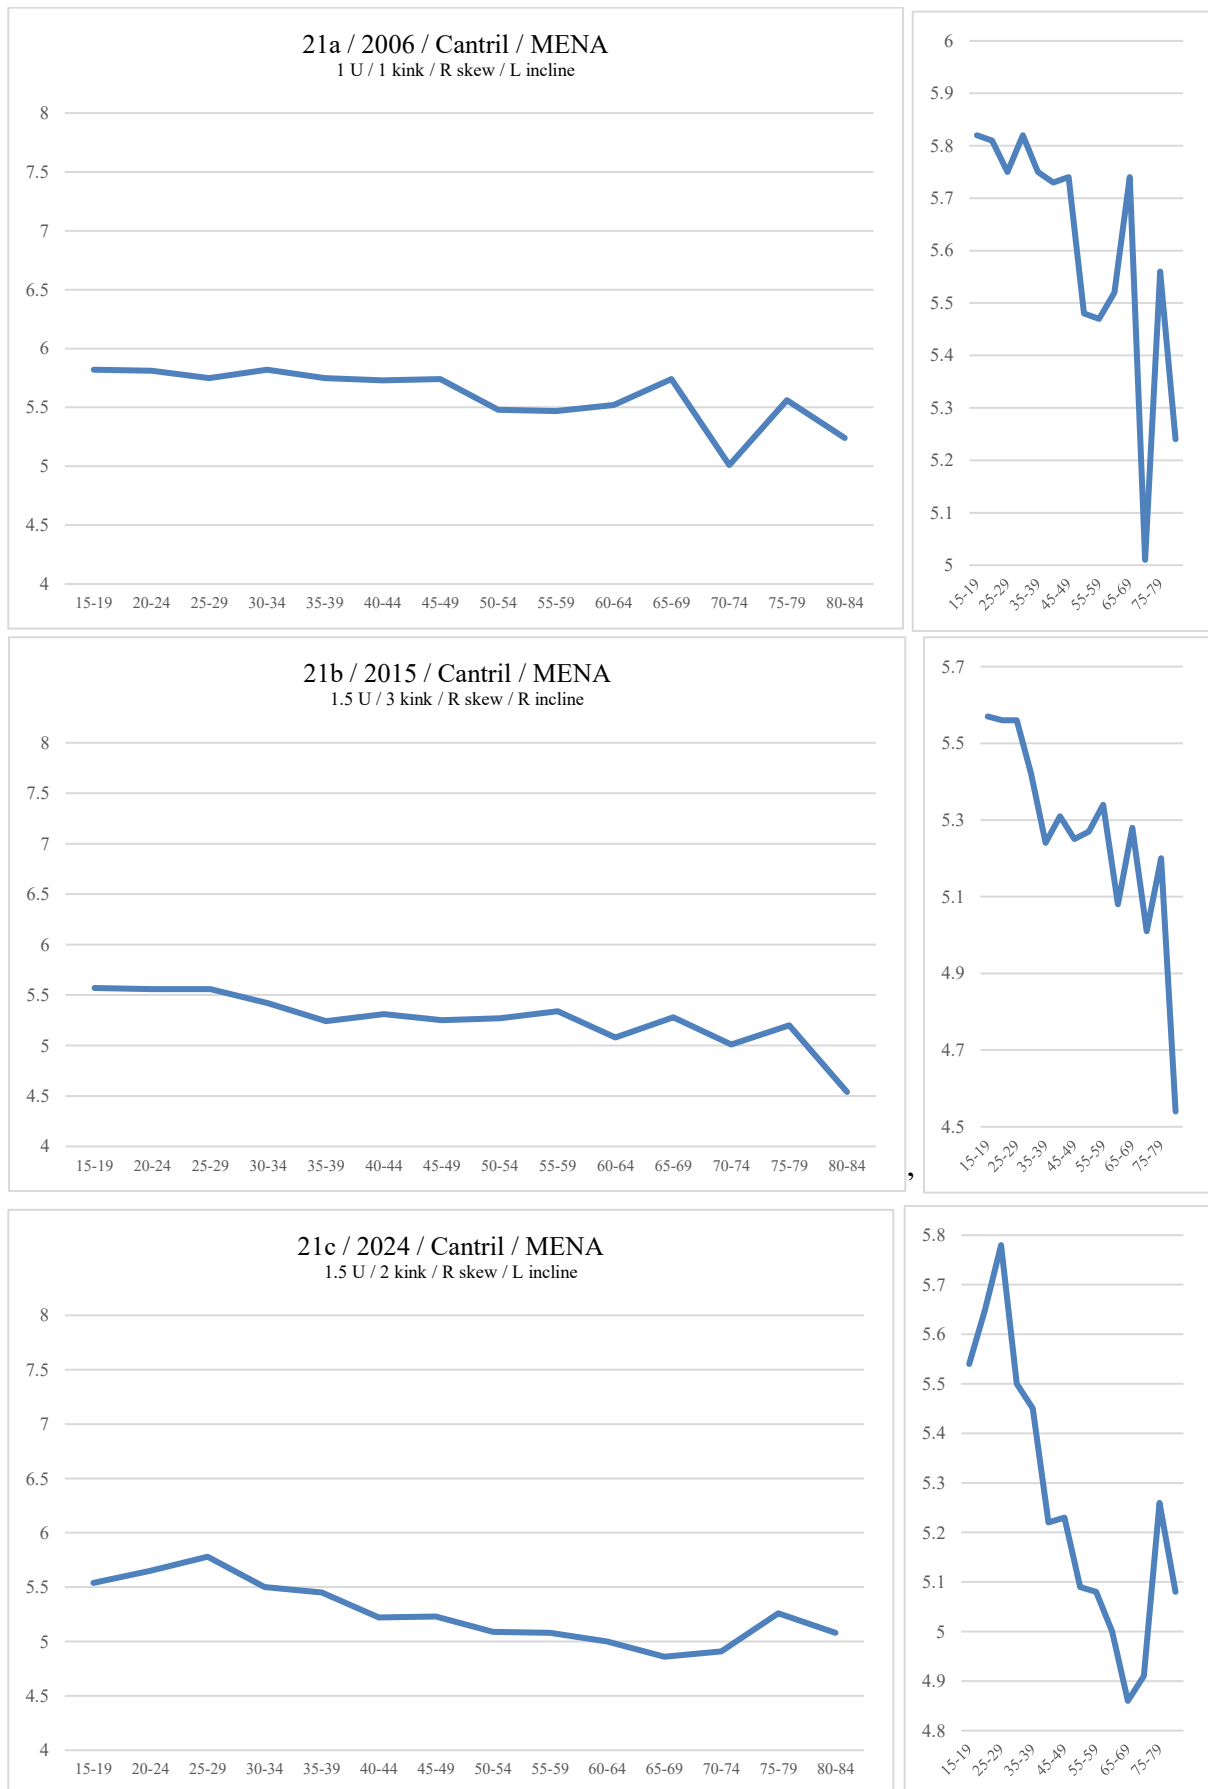

Figures S22a-c. Sub-Saharan Africa Cantril means in 2006, 2015, and 2024

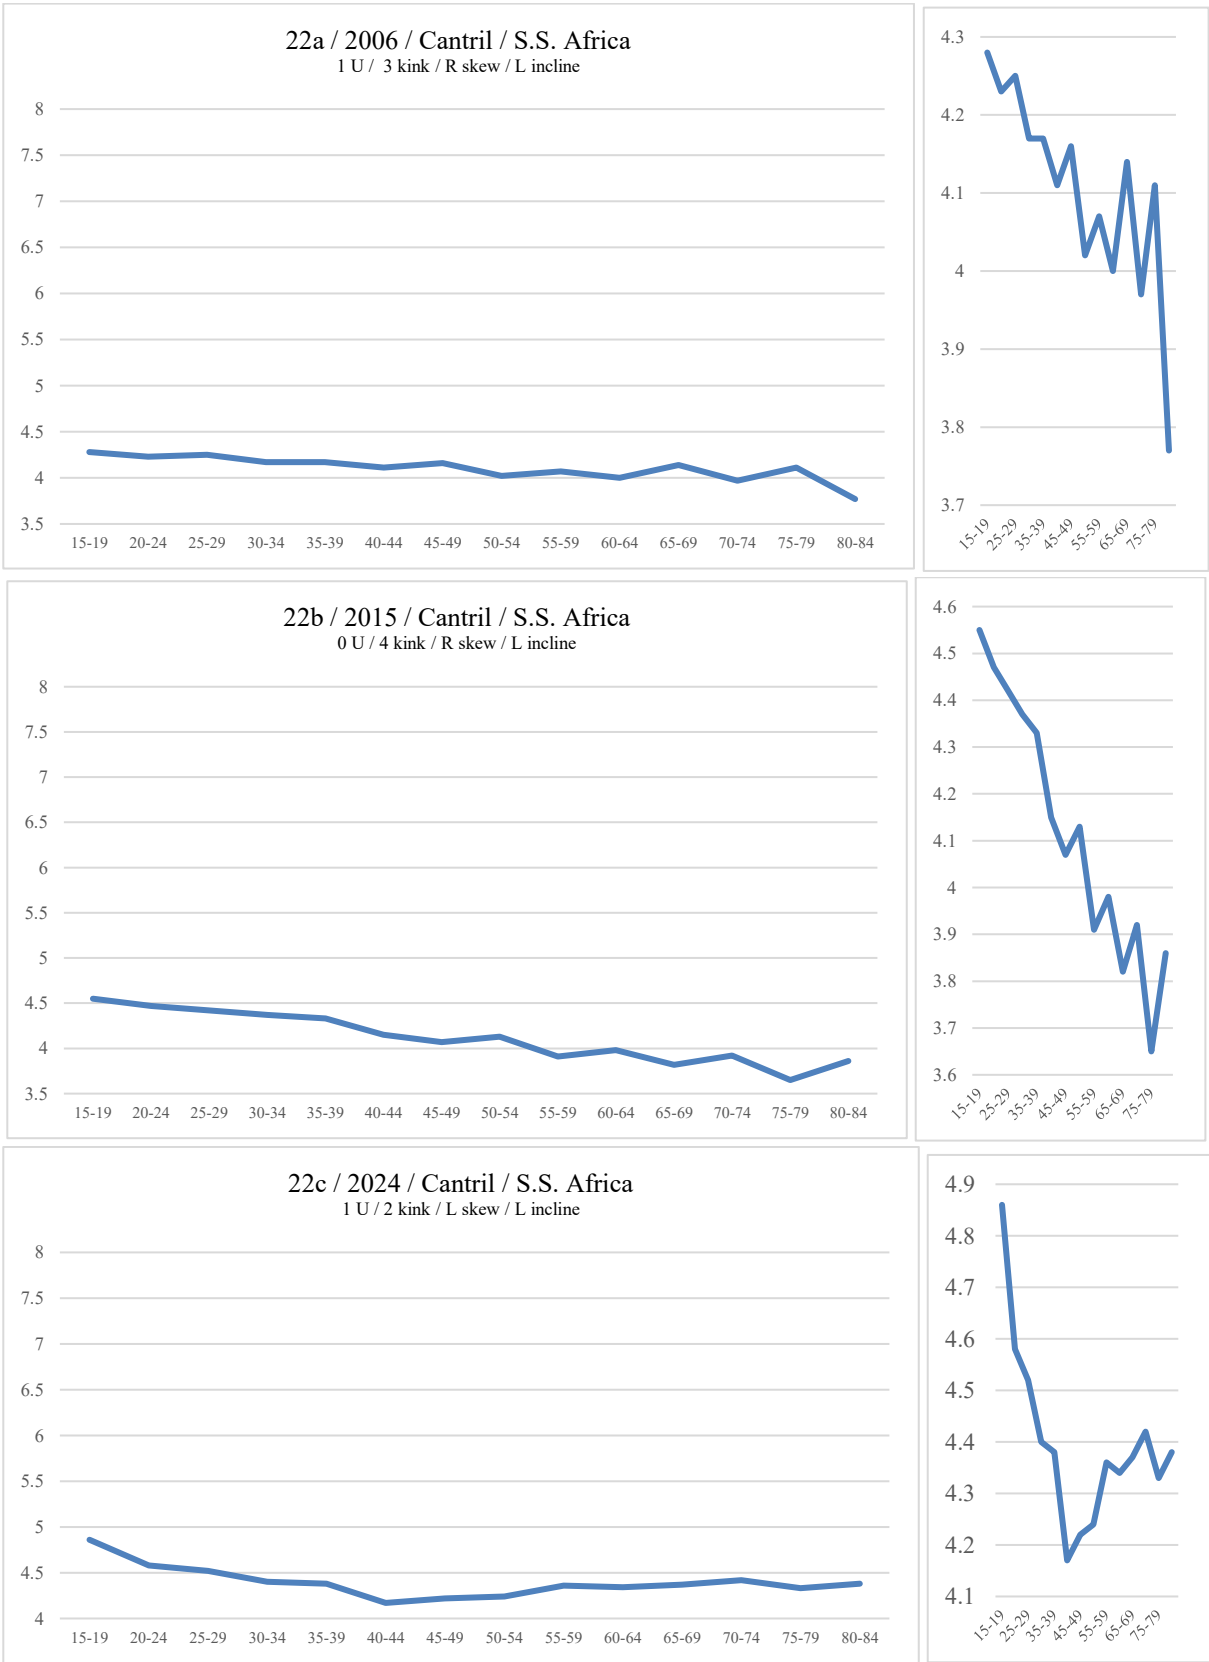

**Figures S23-33. Change in regional Positive Experience means from 2006, 2015, 2024**

**Figures S23a-c. EU Positive Experience means in 2006, 2015, 2024**

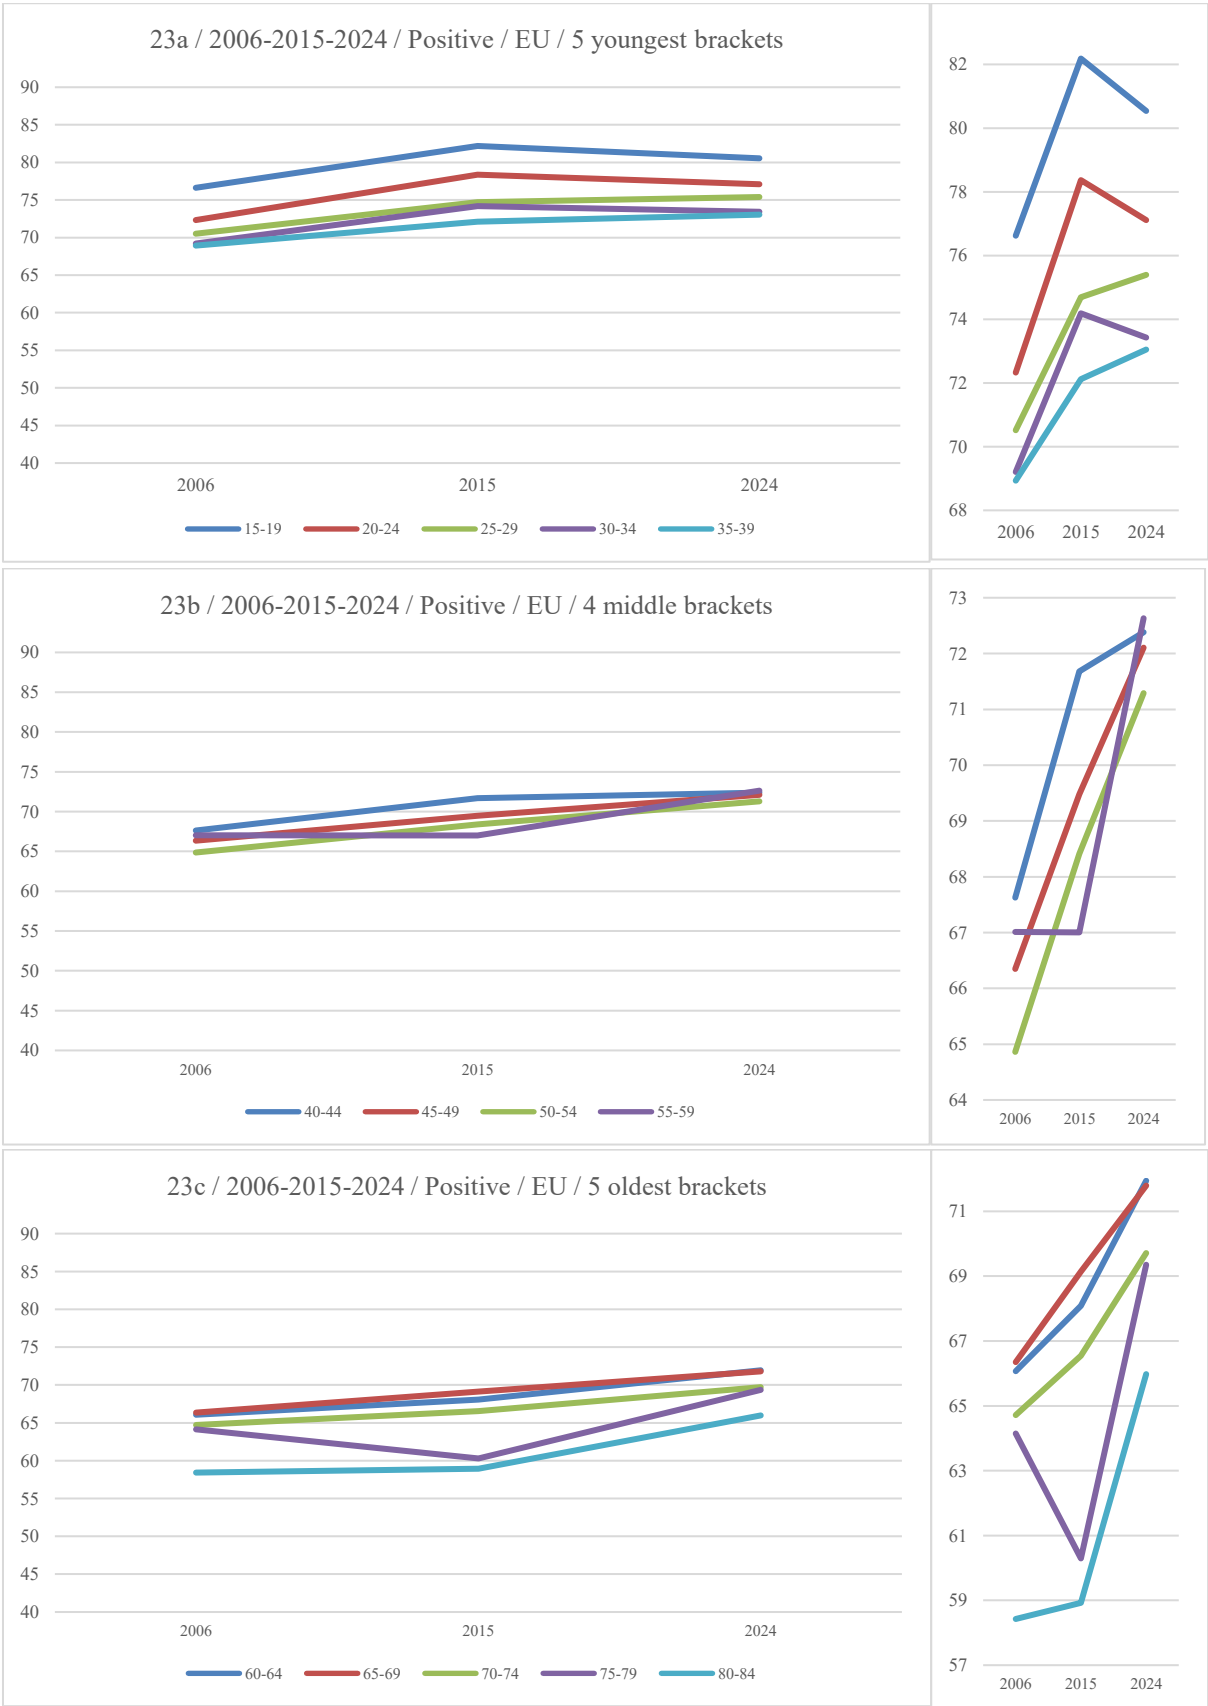

Figures S24a-c. Europe other Positive Experience means in 2006, 2015, 2024

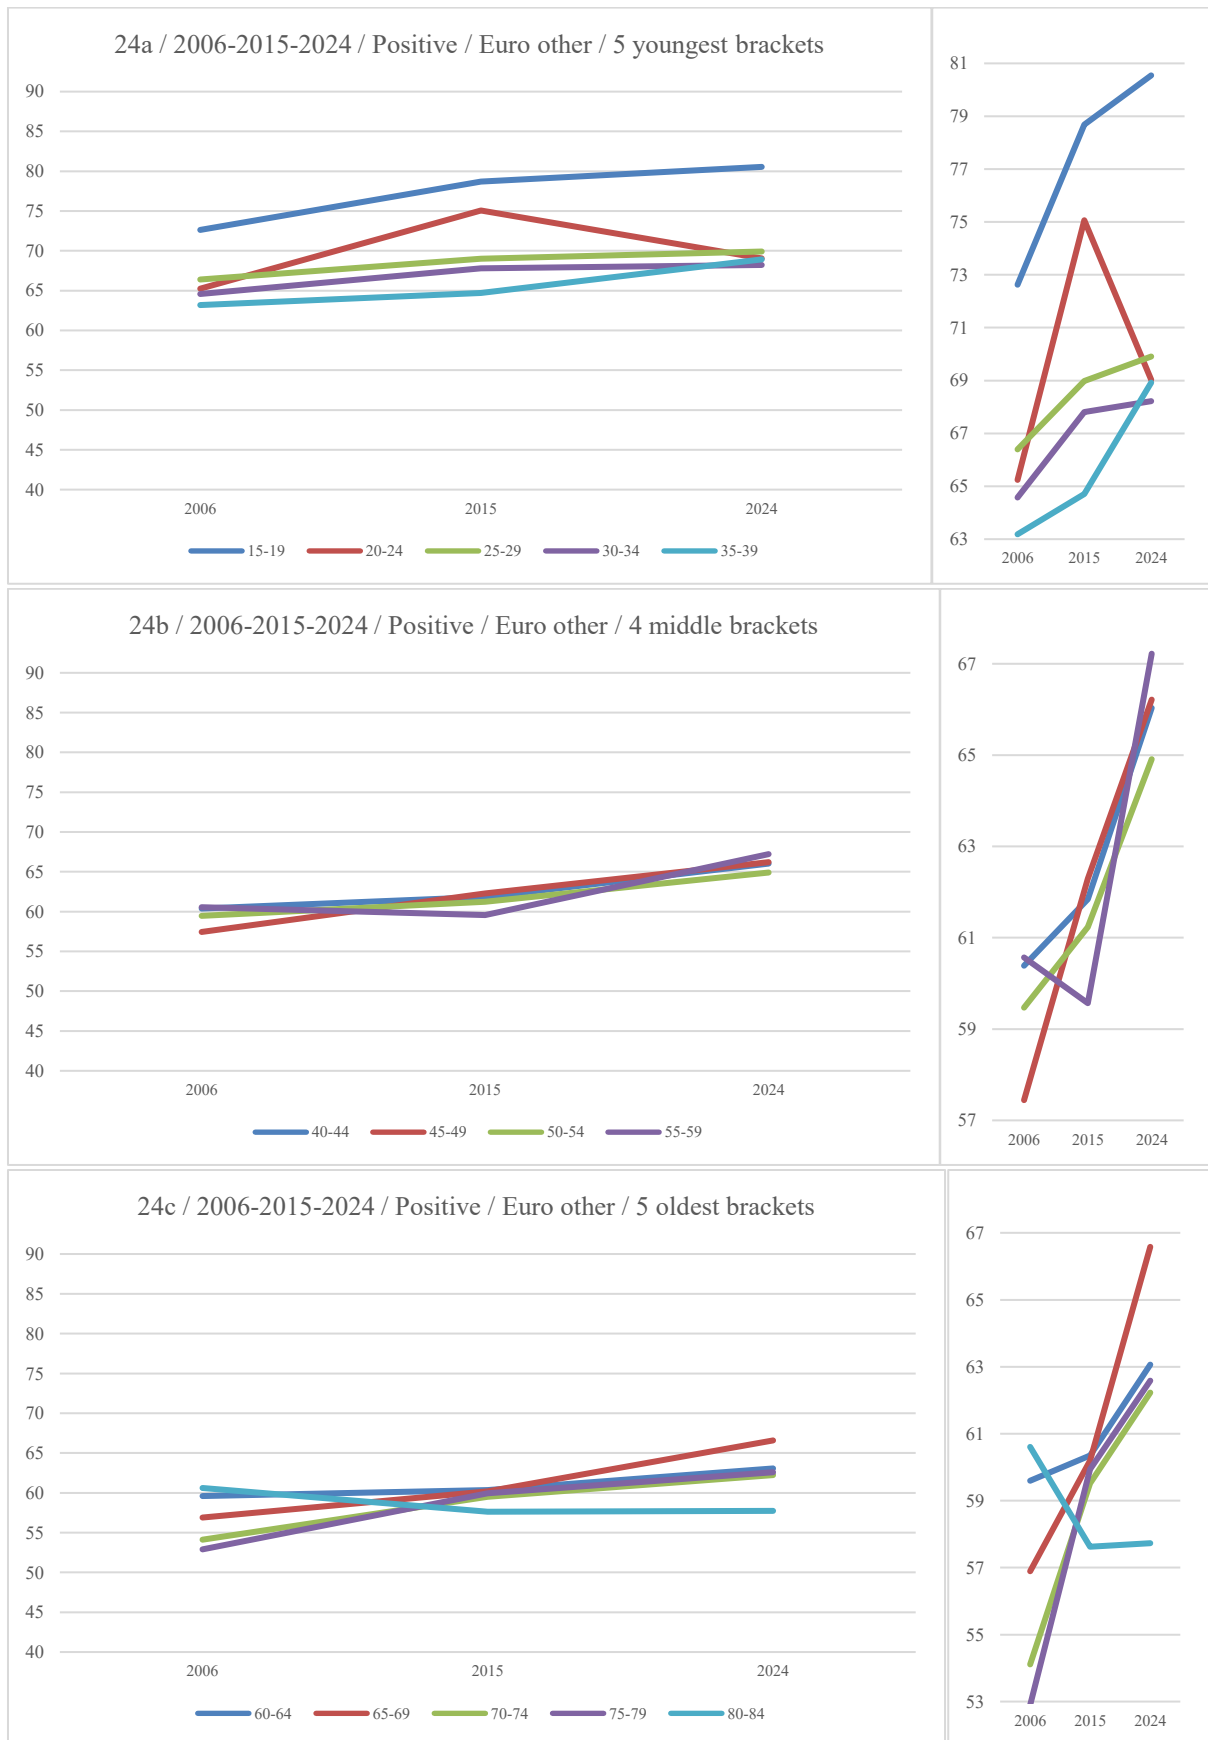

Figures S25a-c. Independent states Positive Experience means in 2006, 2015, 2024

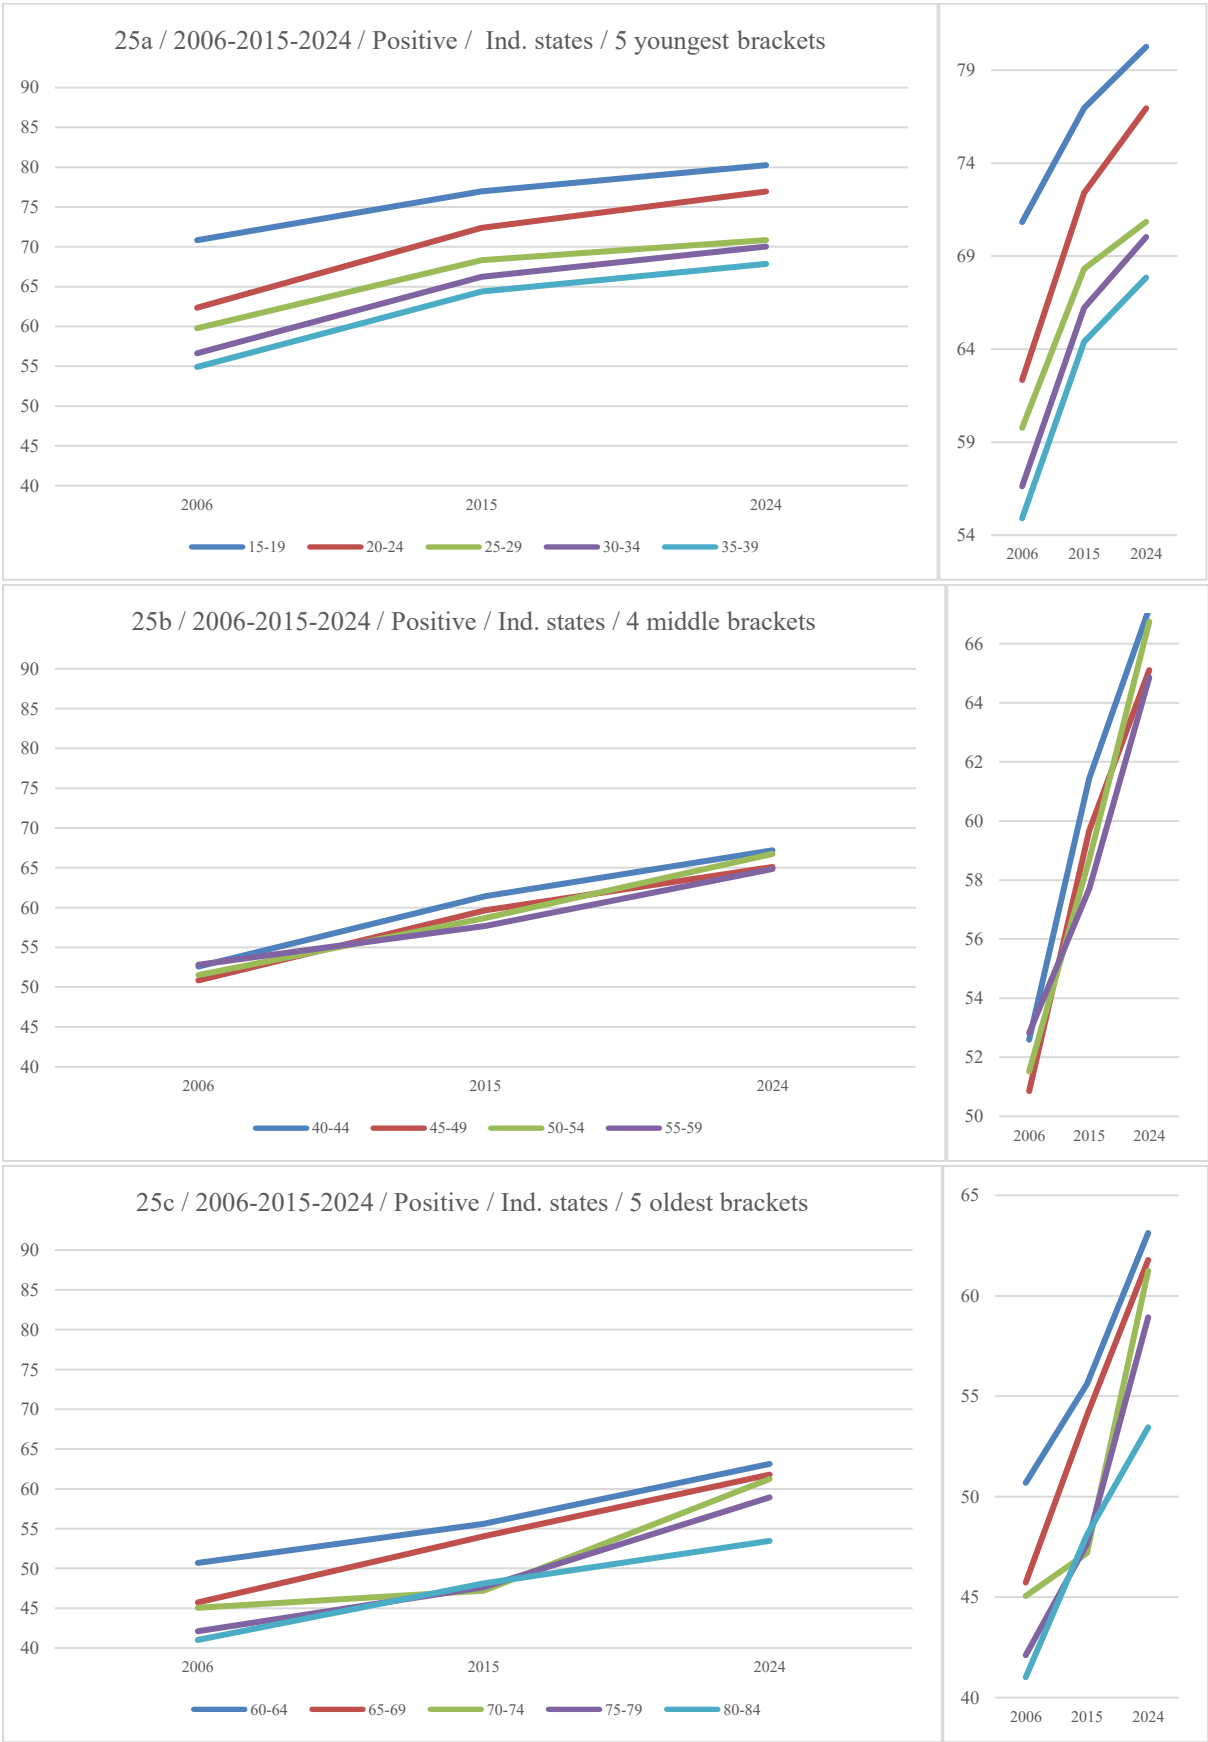

Figures S26a-c. Australia and New Zealand Positive Experience means in 2006, 2015, 2024

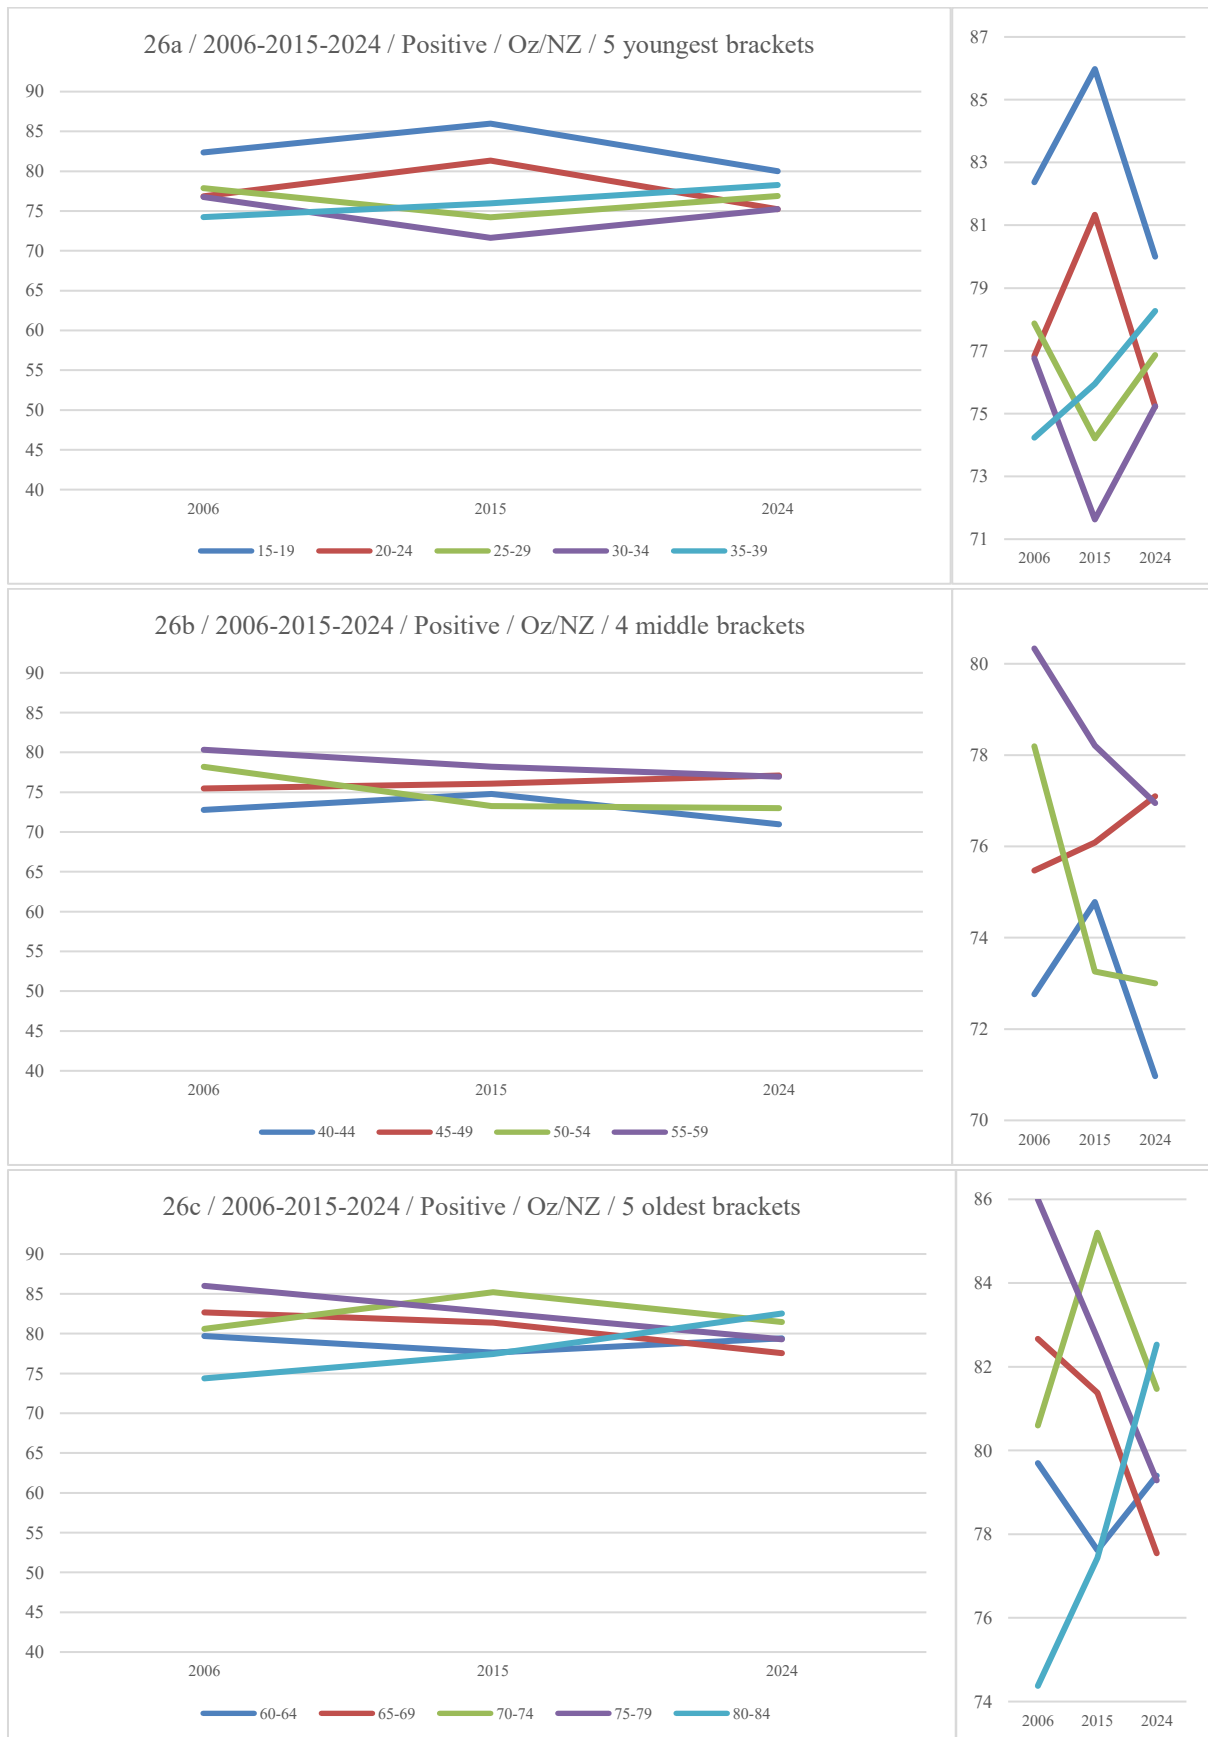

Figures S27a-c. South East Asia Positive Experience means in 2006, 2015, 2024

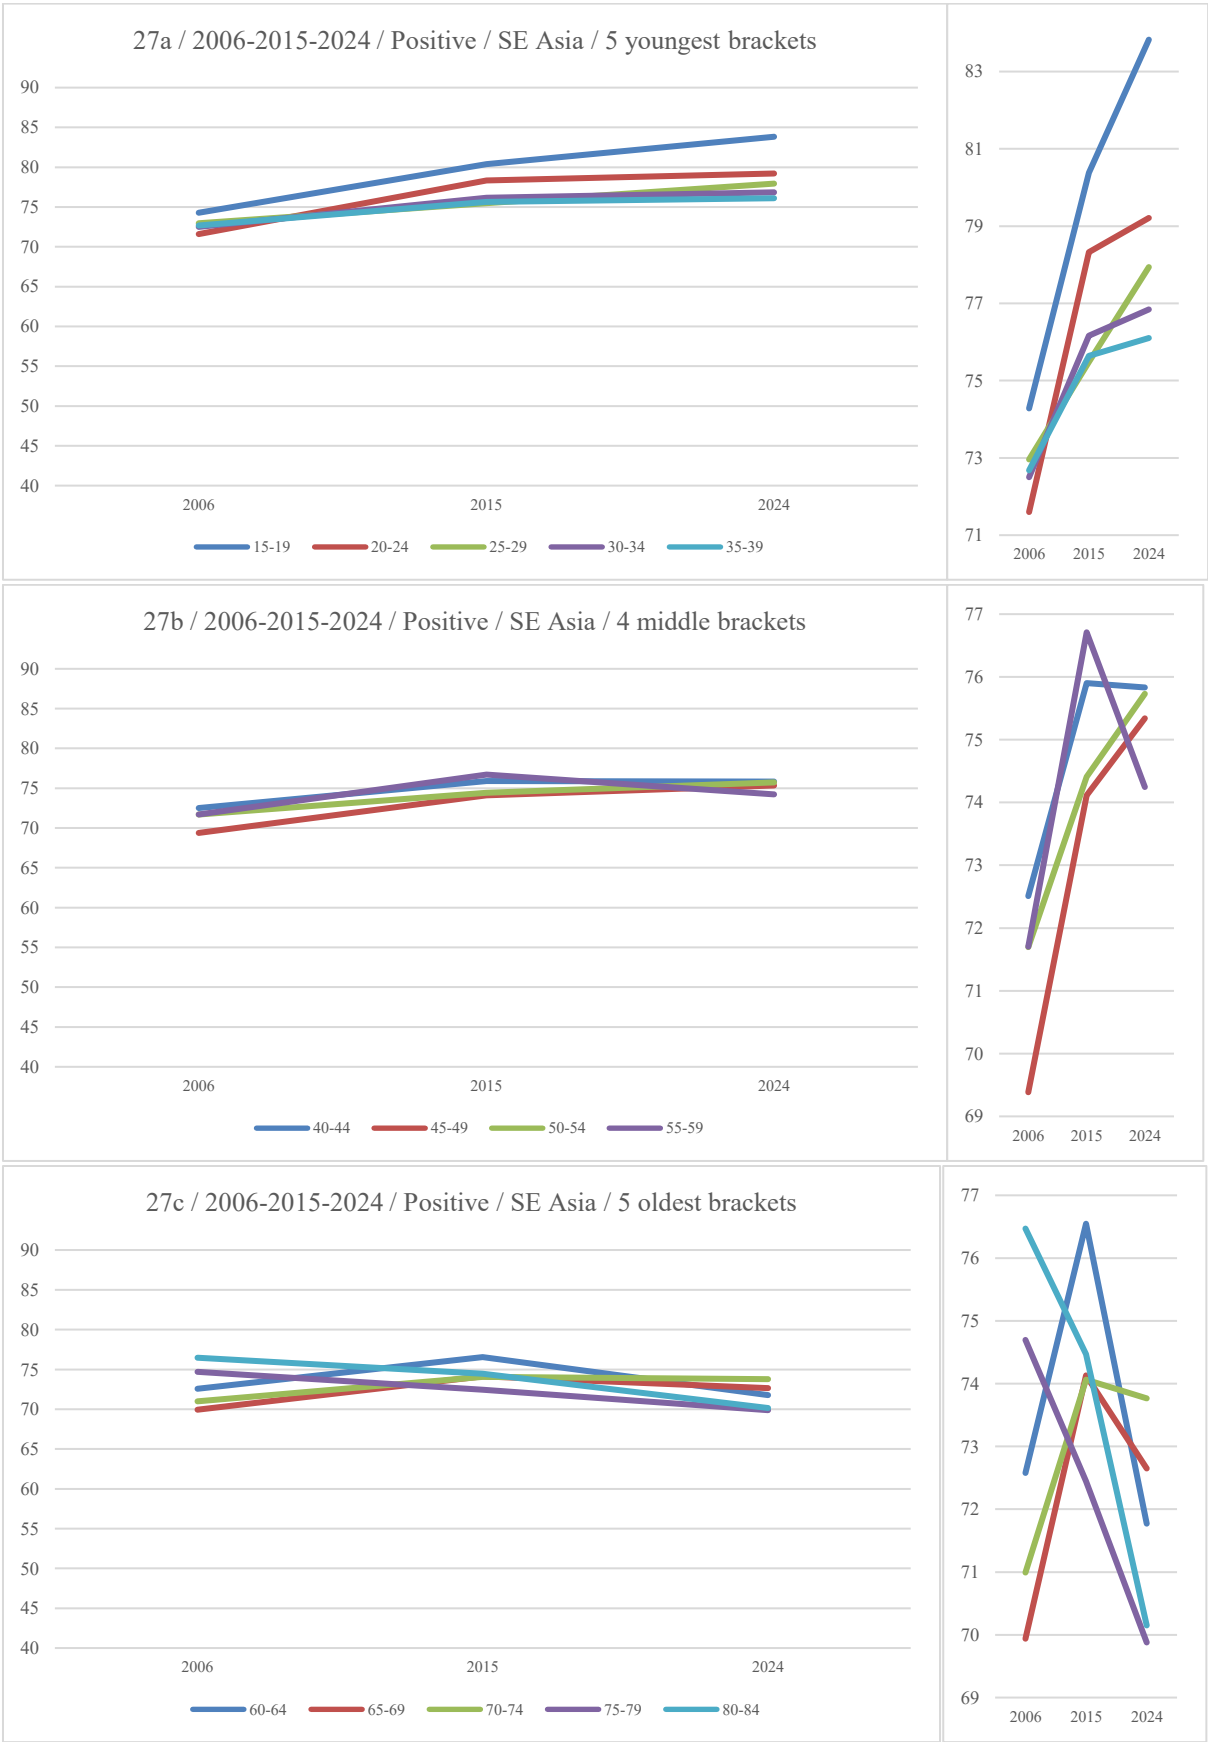

Figures S28a-c. South Asia Positive Experience means in 2006, 2015, 2024

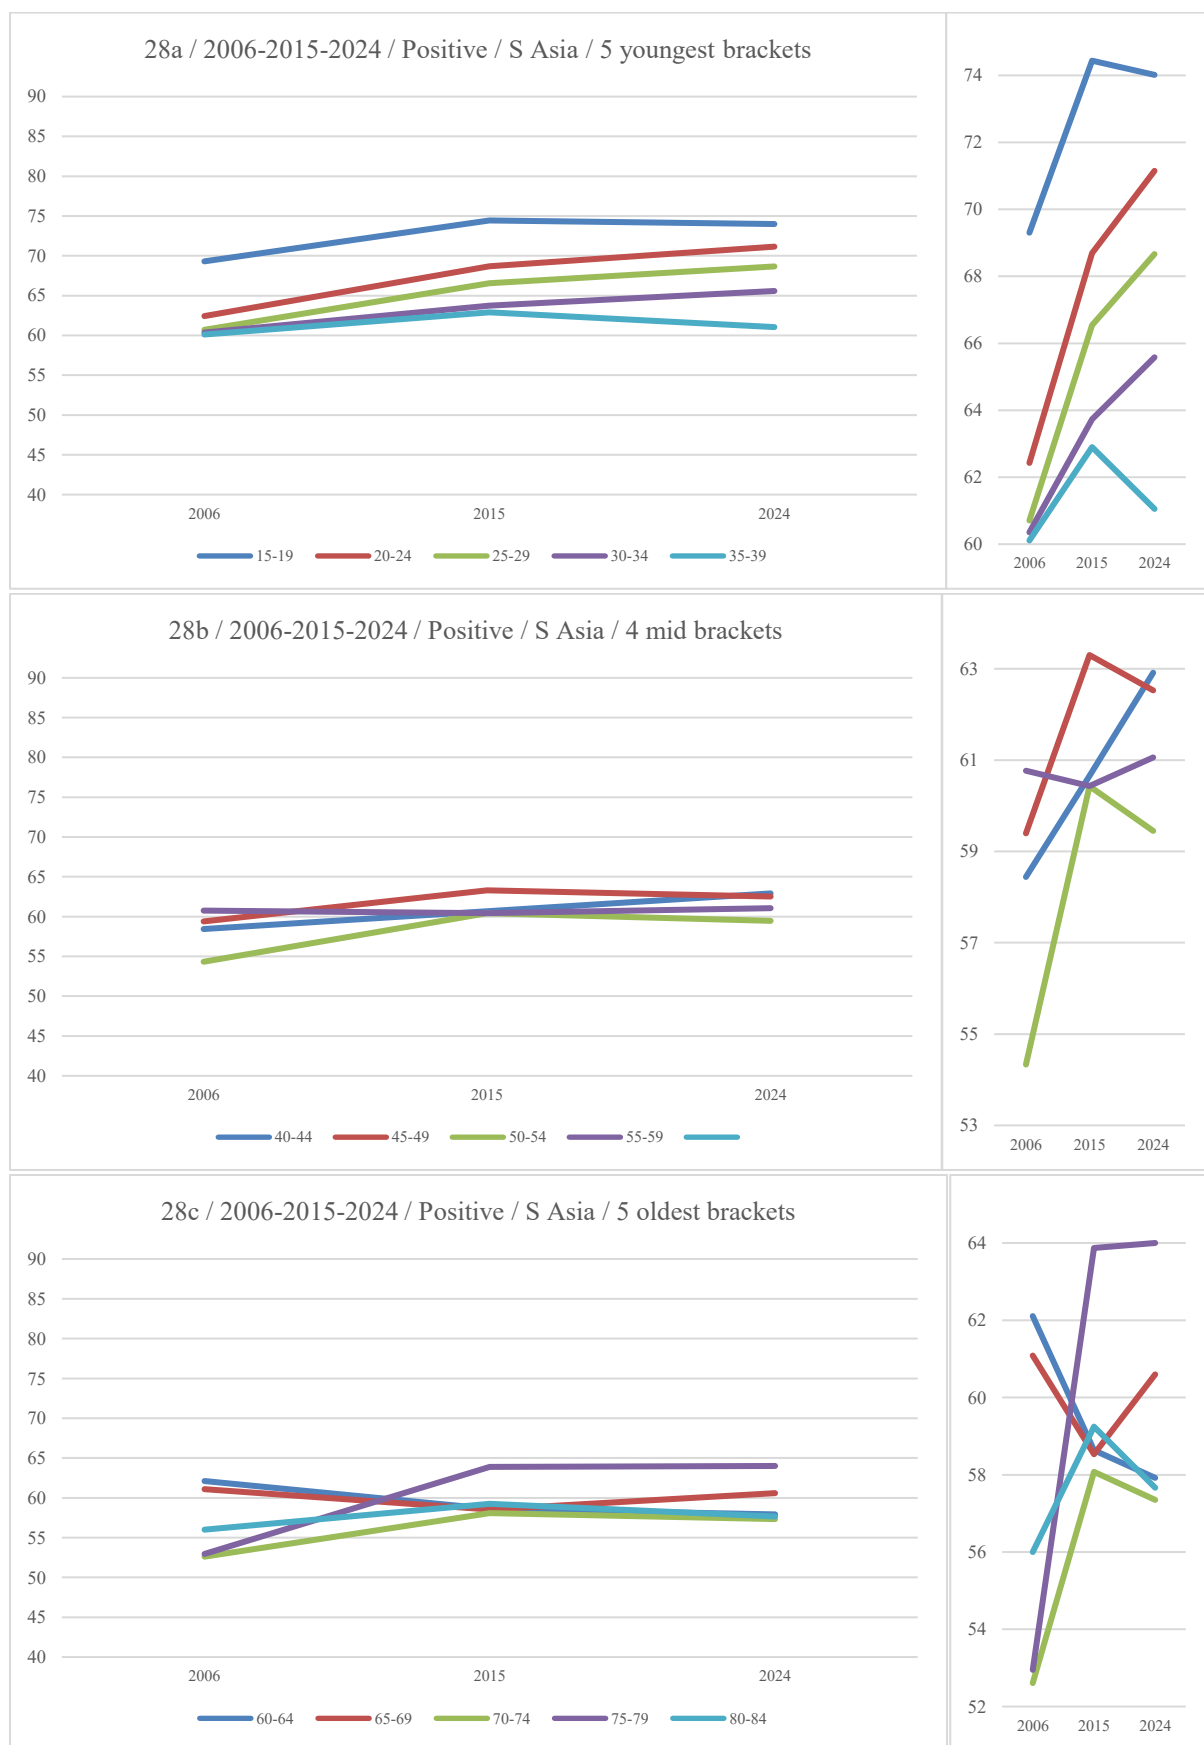

Figures S29a-c. East Asia Positive Experience means in 2006, 2015, 2024

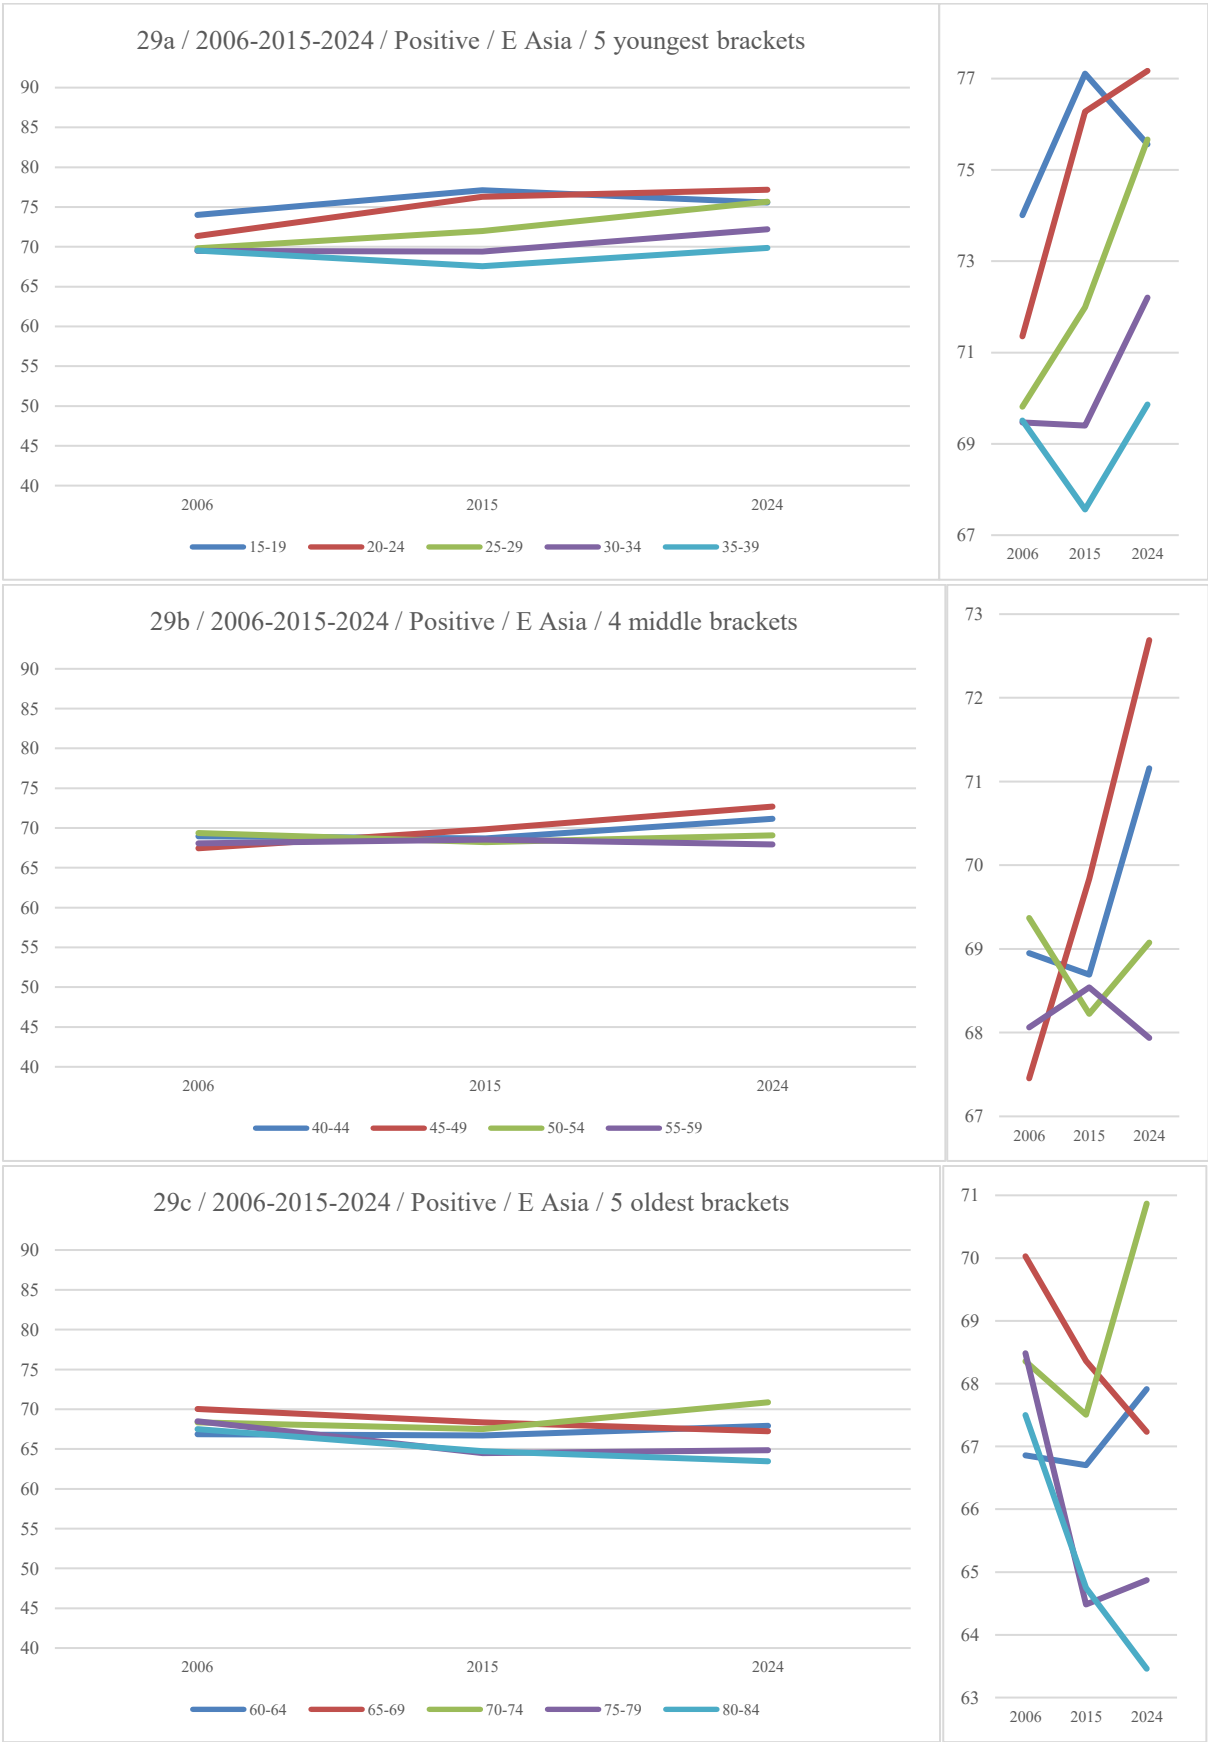

Figures S30a-c. Latin America Positive Experience means in 2006, 2015, 2024

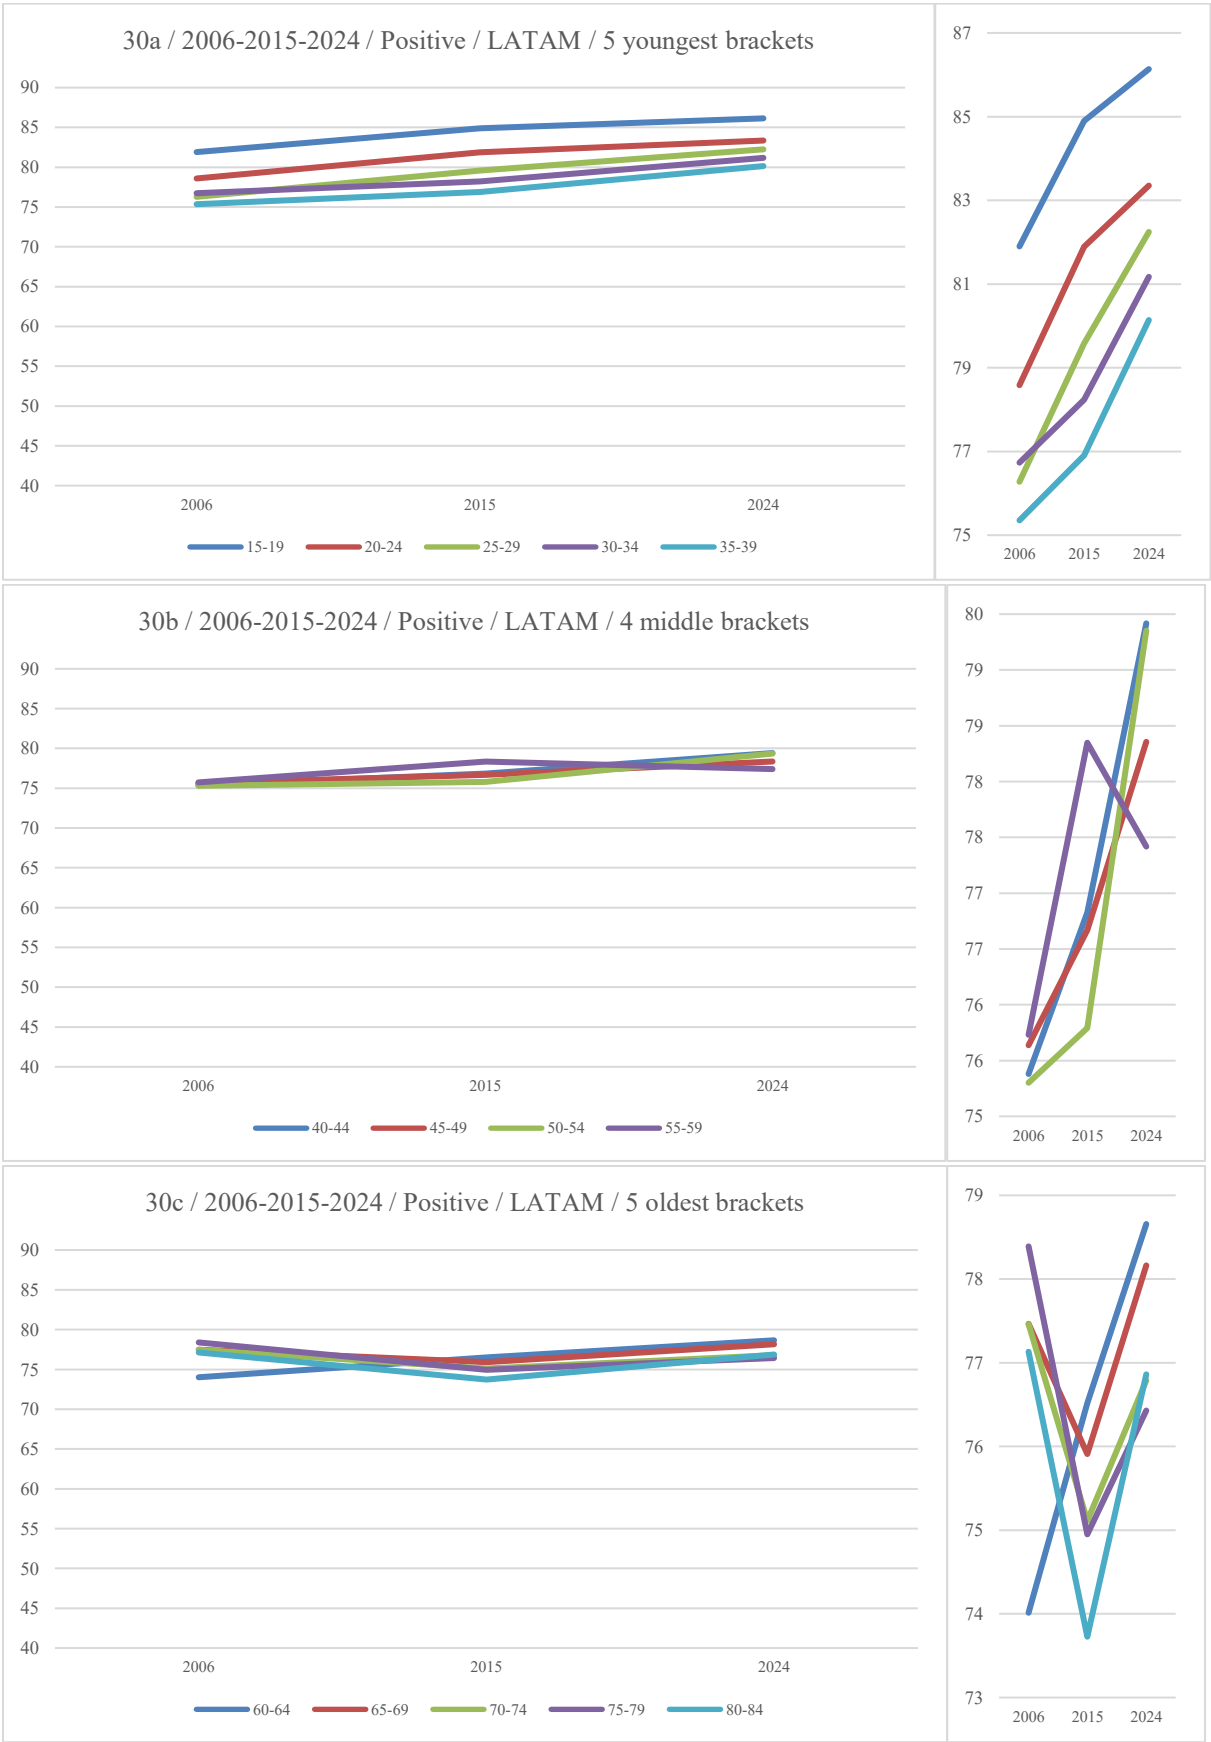

Figures S31a-c. North America Positive Experience means in 2006, 2015, 2024

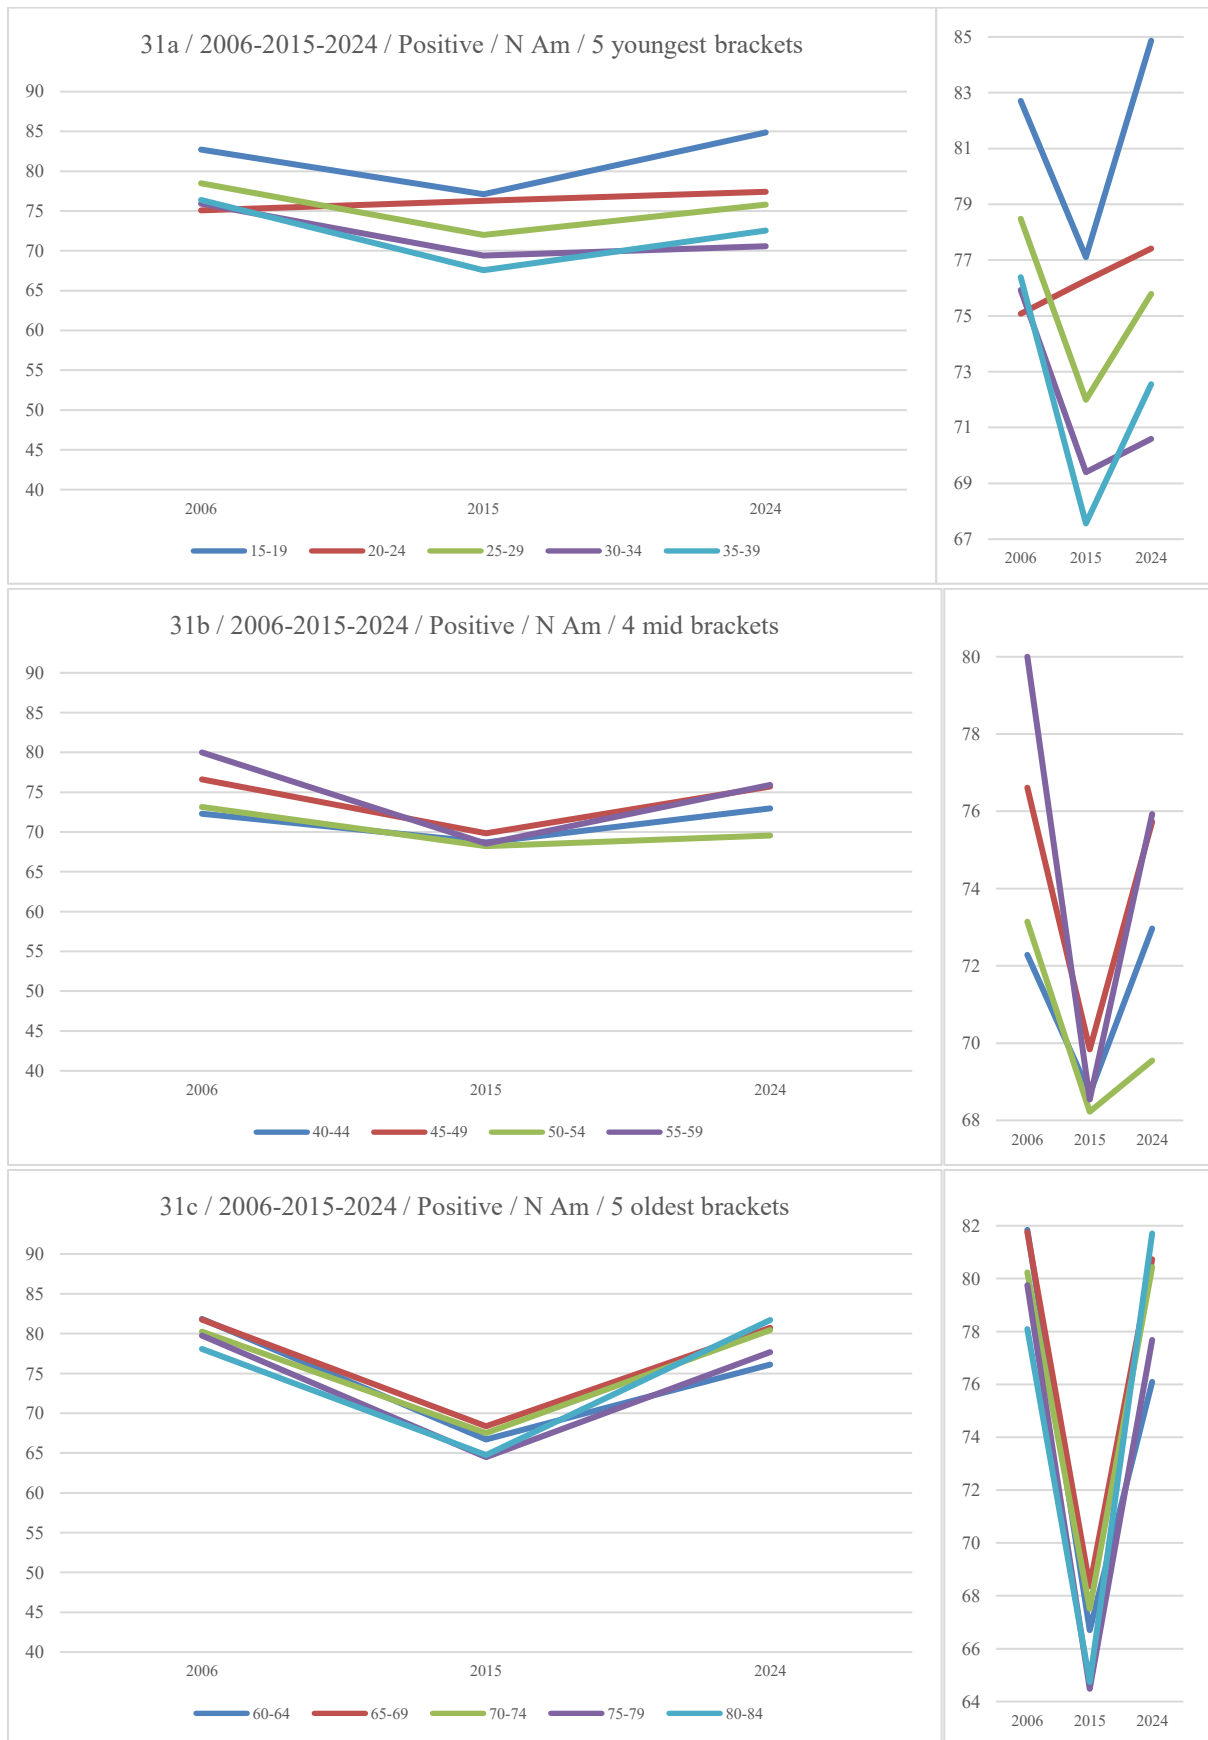

Figures S32a-c. Middle East and North Africa Positive Experience means in 2006, 2015, 2024

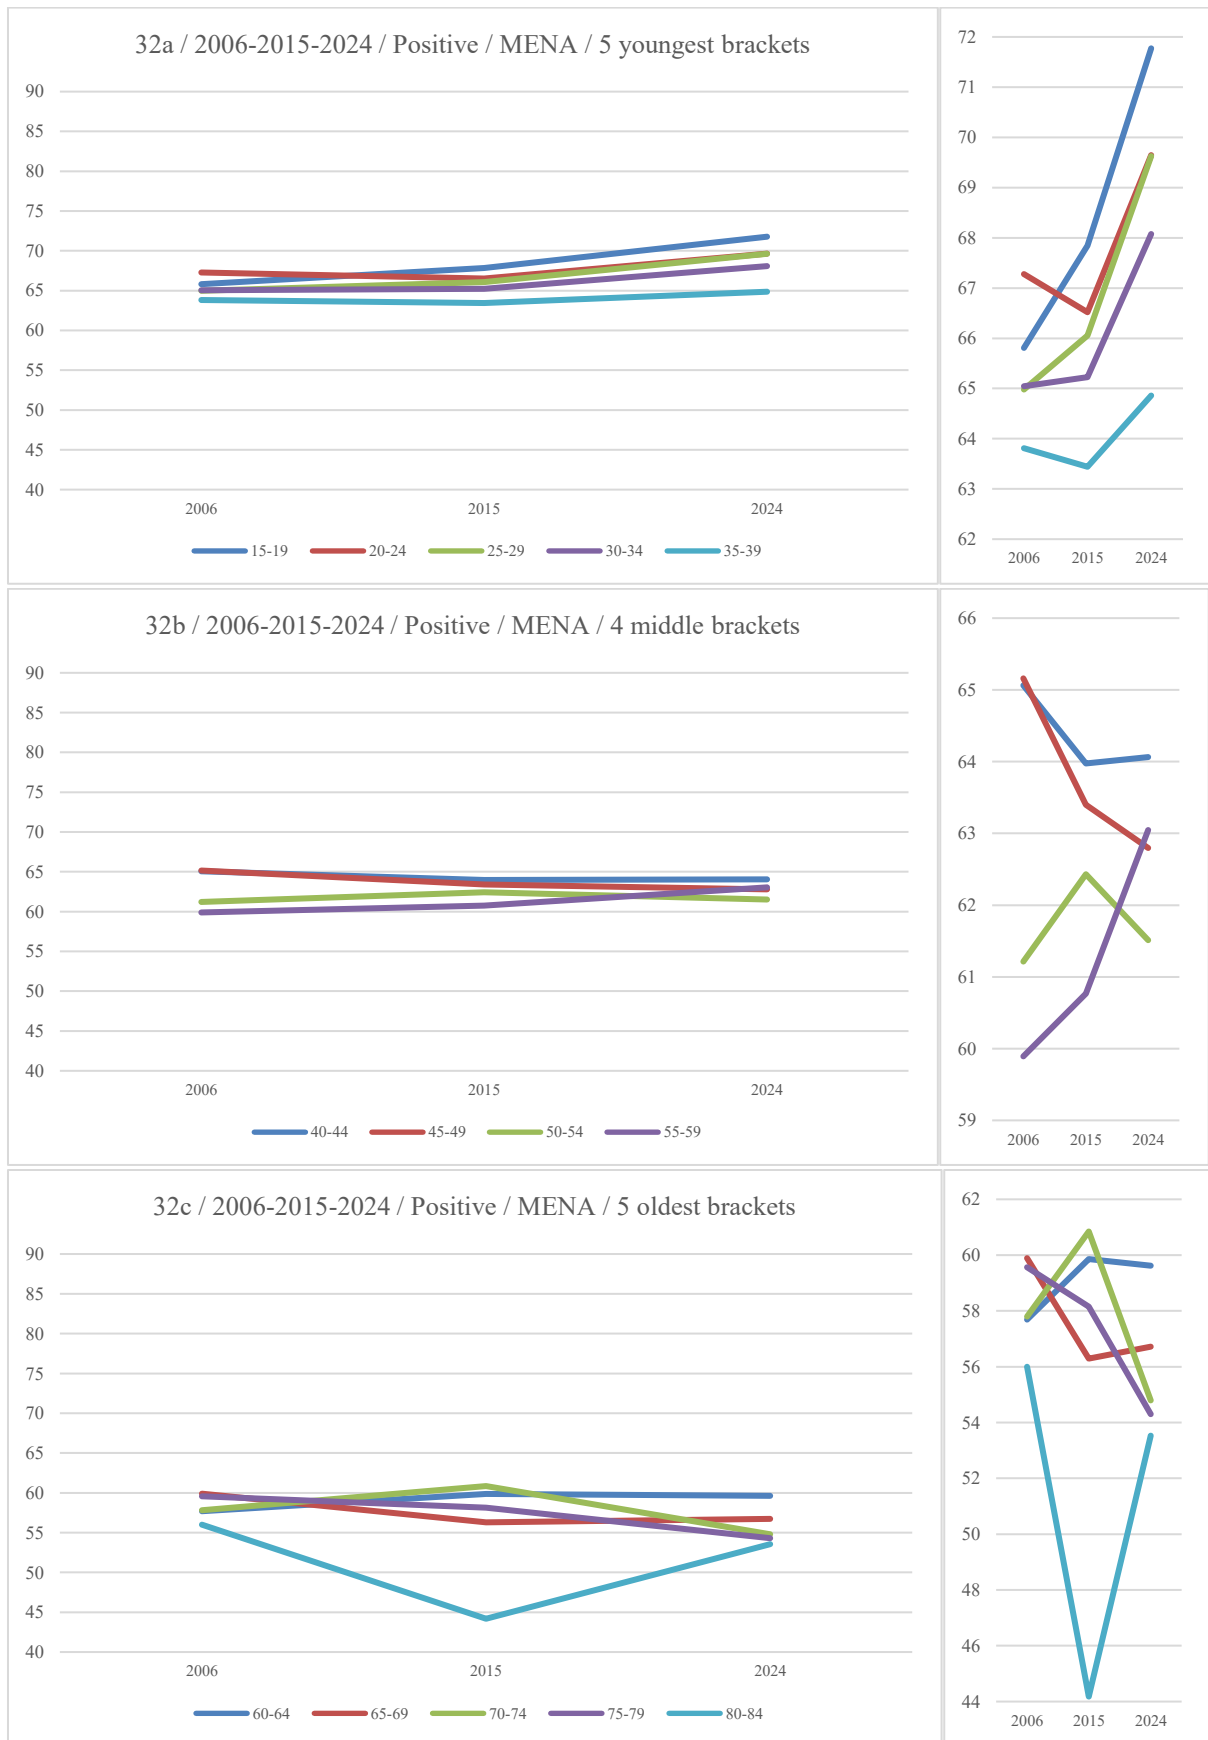

Figures S33a-c. Sub-Saharan Africa Positive Experience means in 2006, 2015, 2024

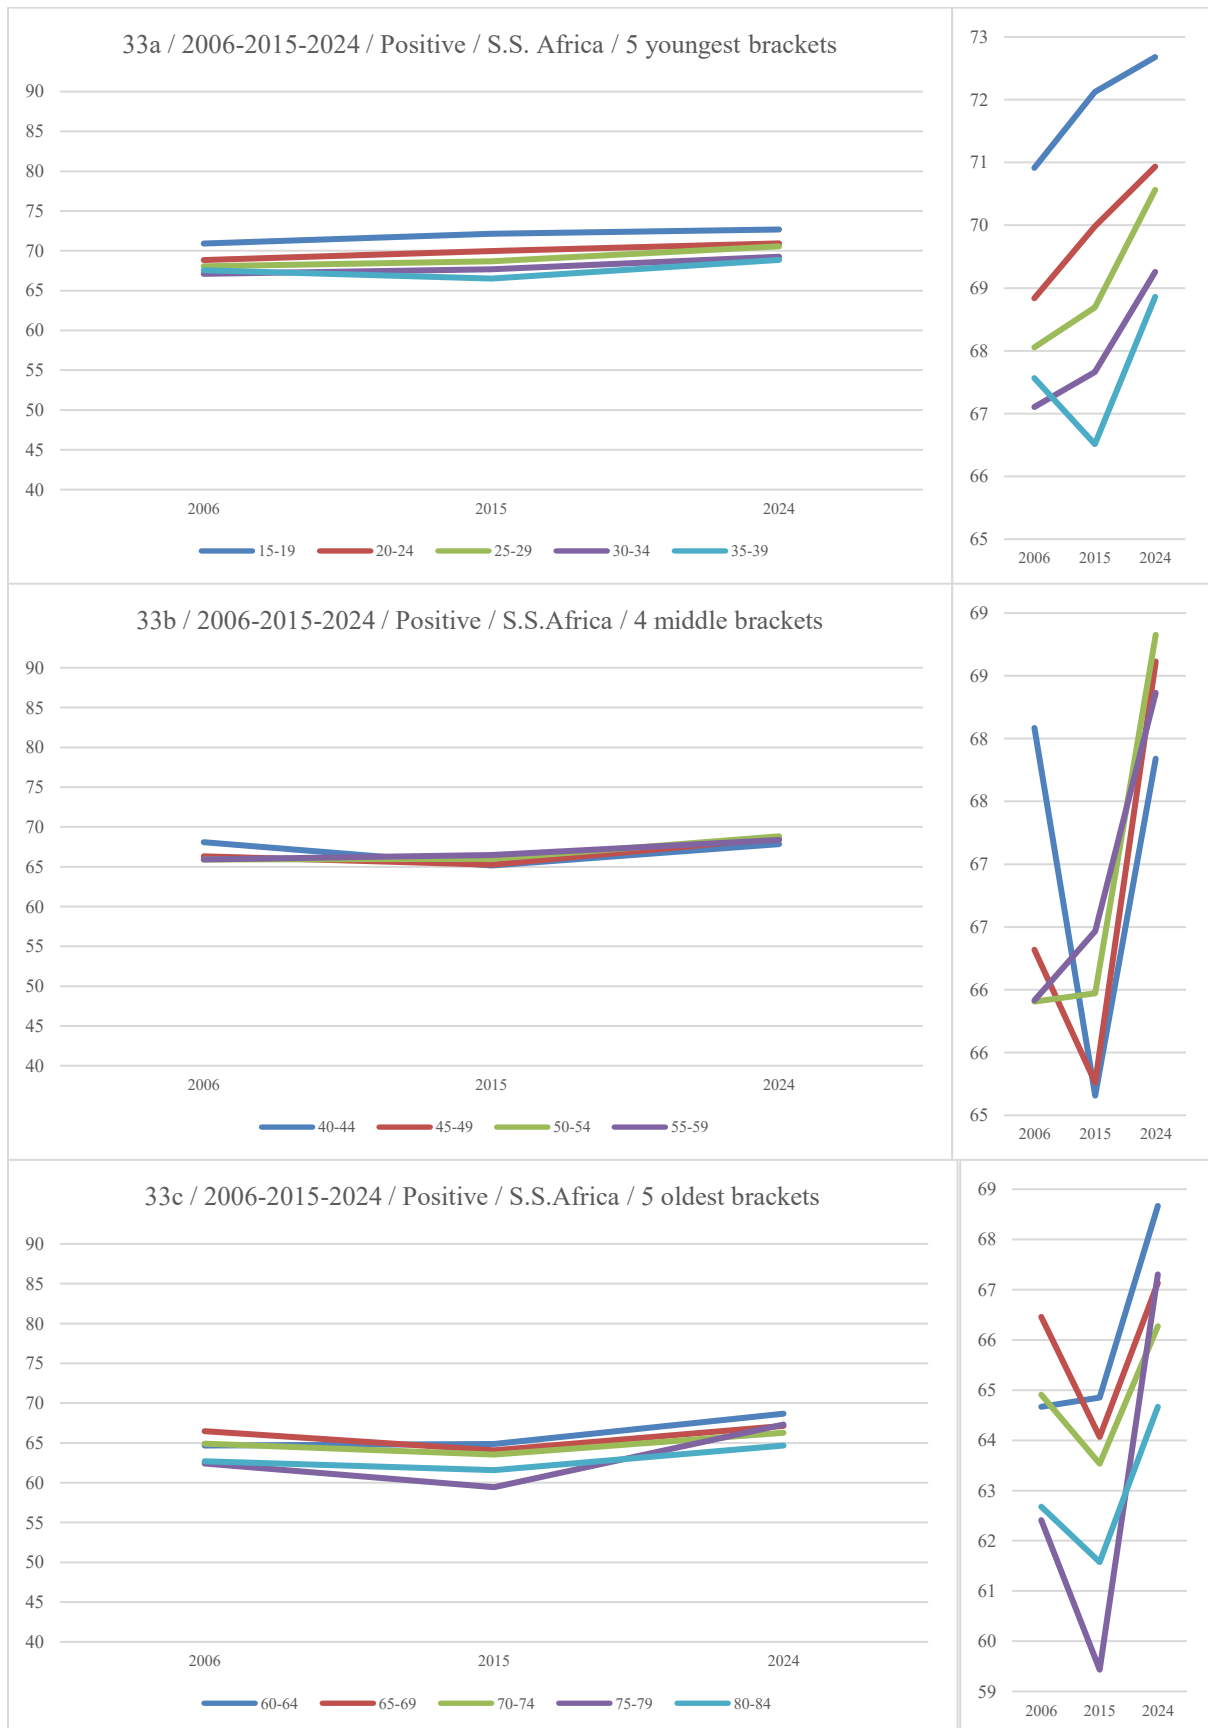

**Figures S34-44. Regional Positive Experience means in 2006, 2015, and 2024**

**Figures S34a-c. EU Positive Experience means in 2006, 2015, and 2024**

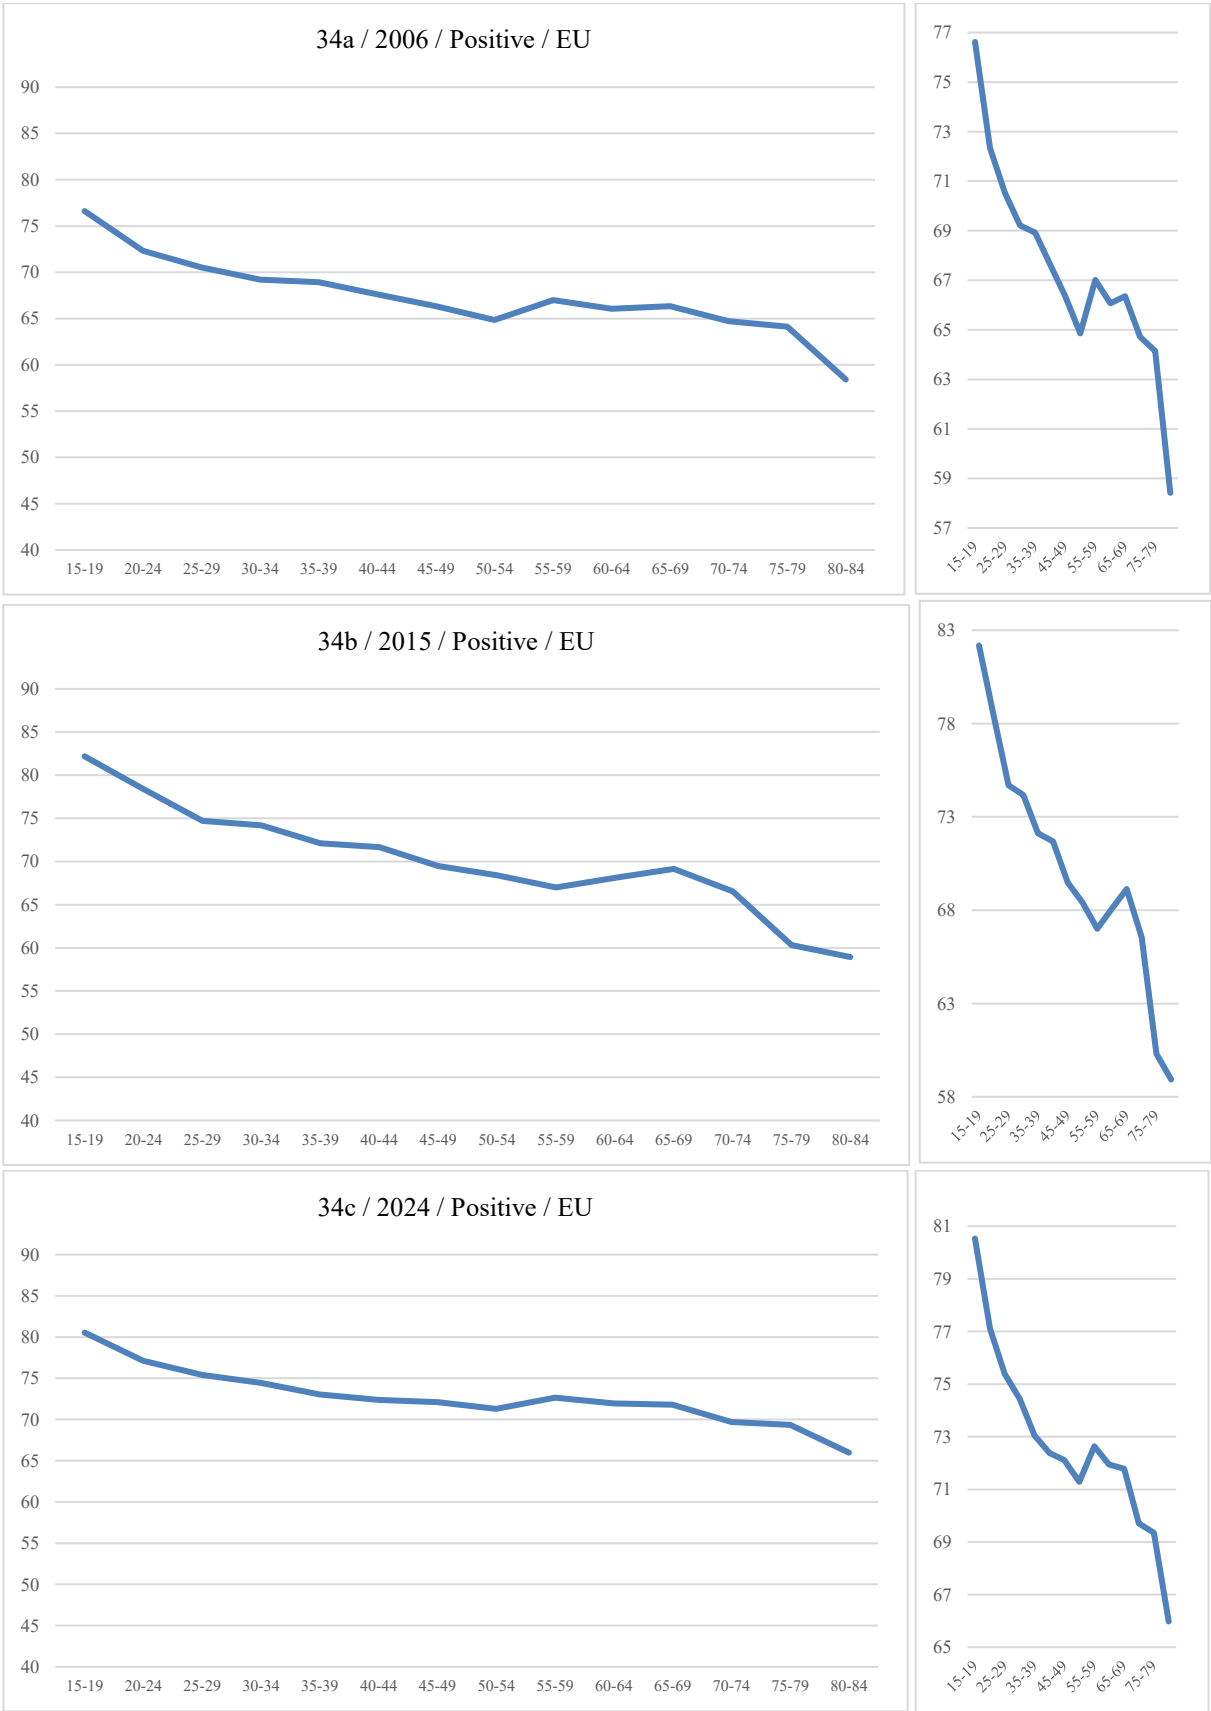

Figures S35a-c. Europe Other Positive Experience means in 2006, 2015, and 2024

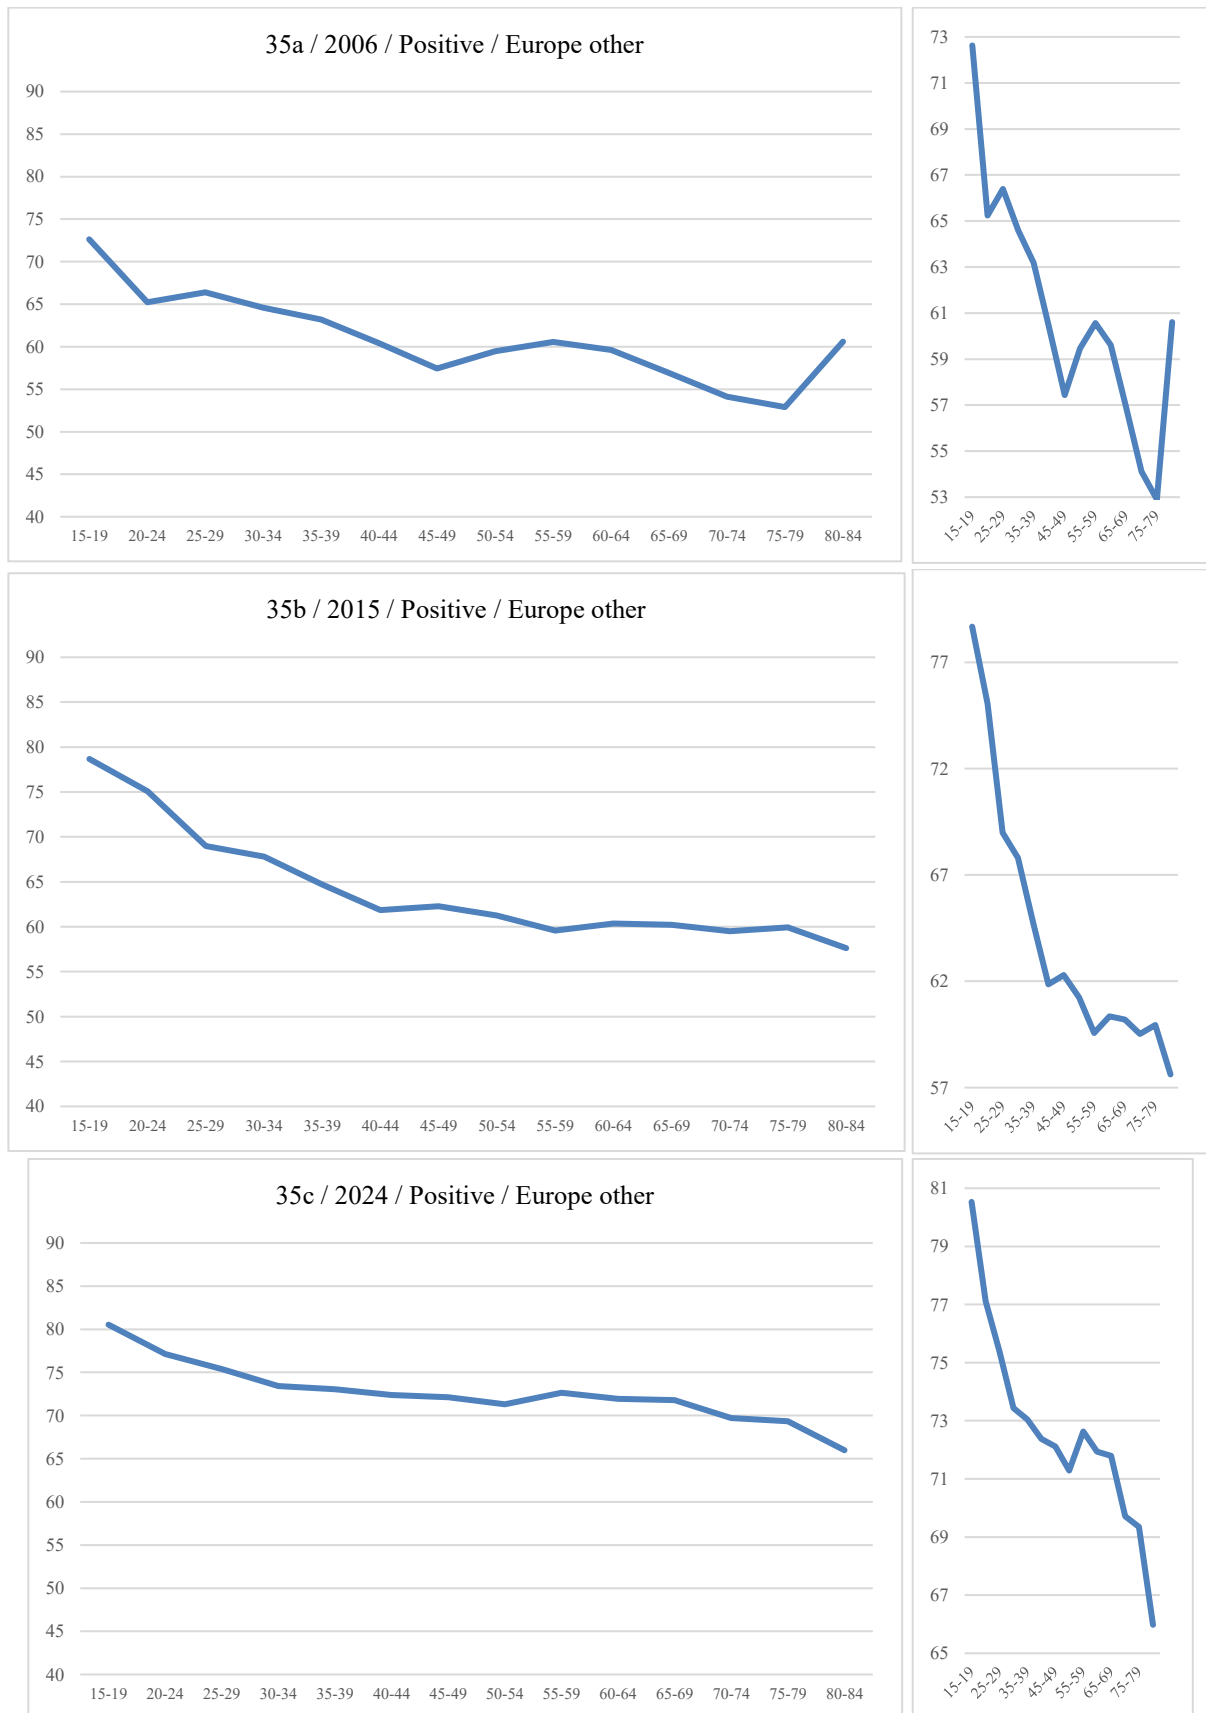

Figures S36a-c. Independent States Positive Experience means in 2006, 2015, and 2024

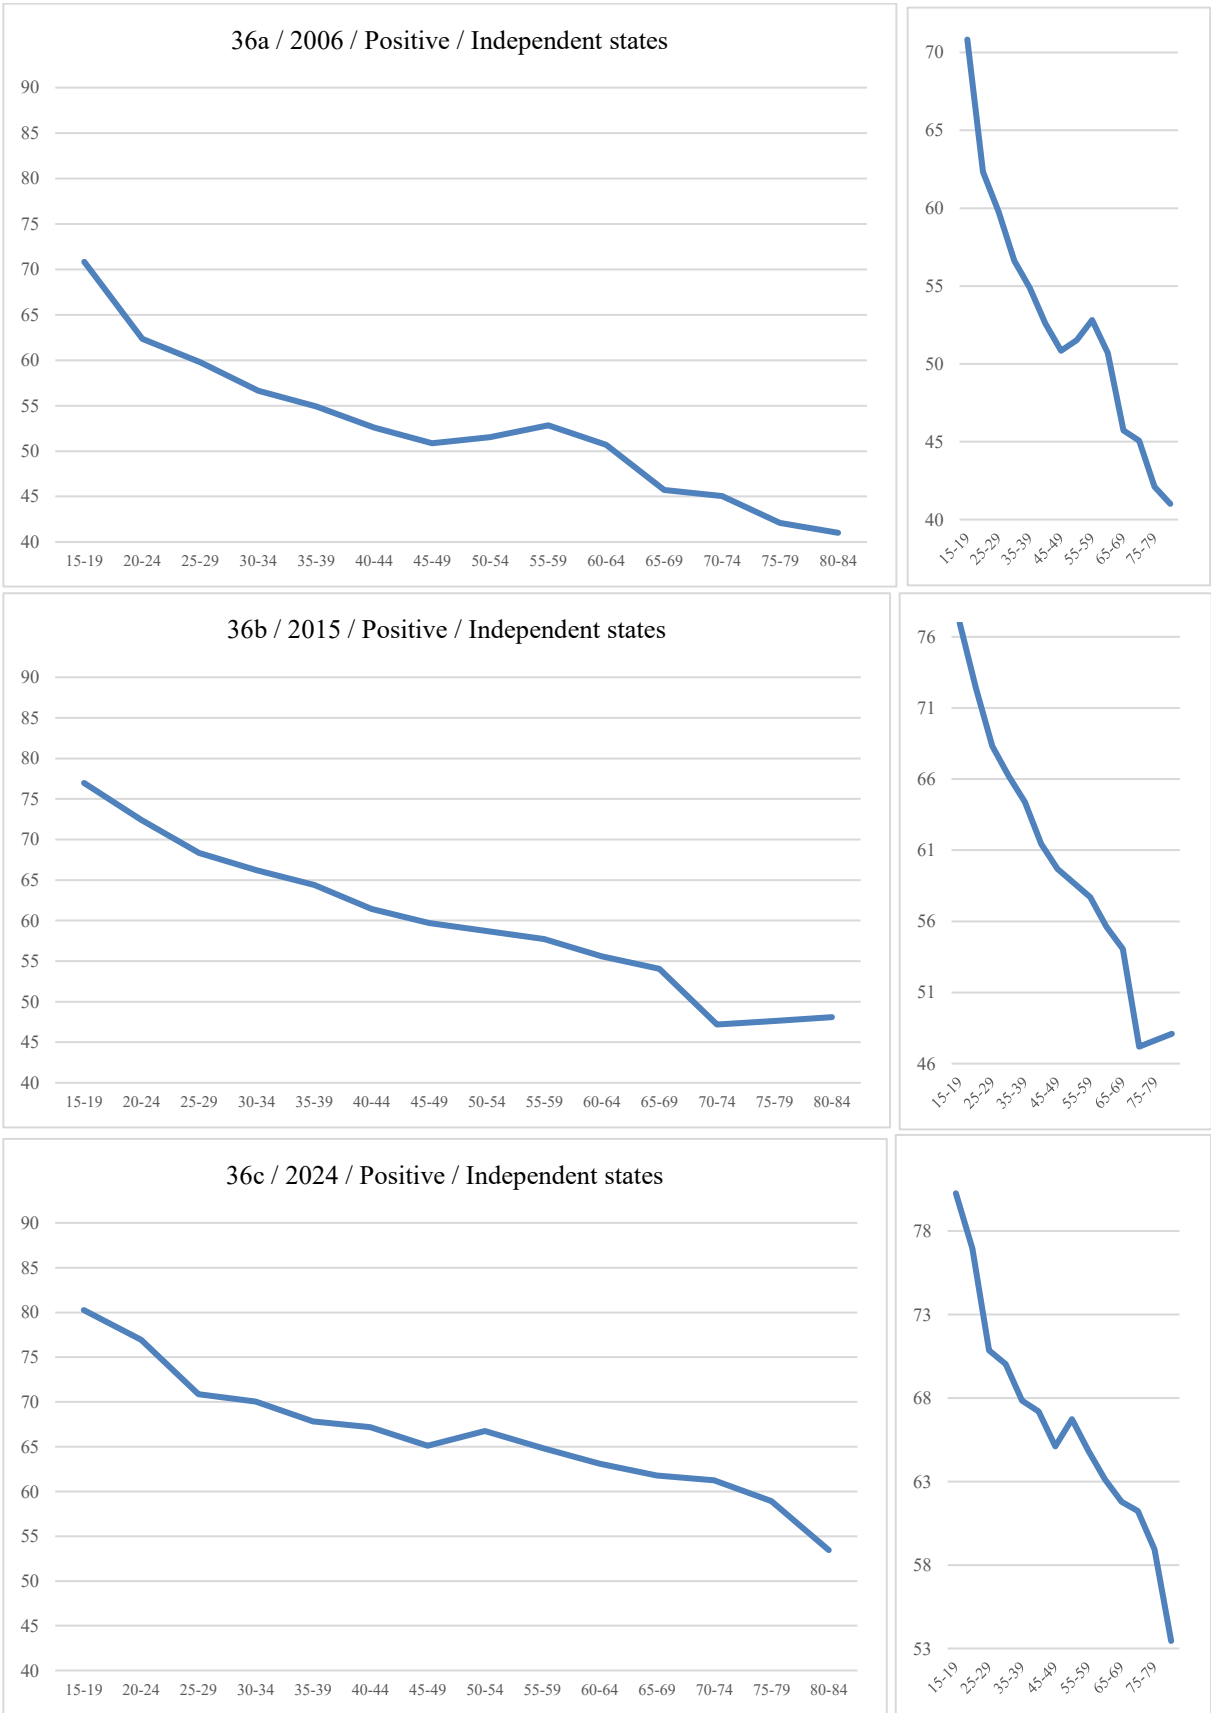

Figures S37a-c. Australia and New Zealand Positive Experience means in 2006, 2015, 2024

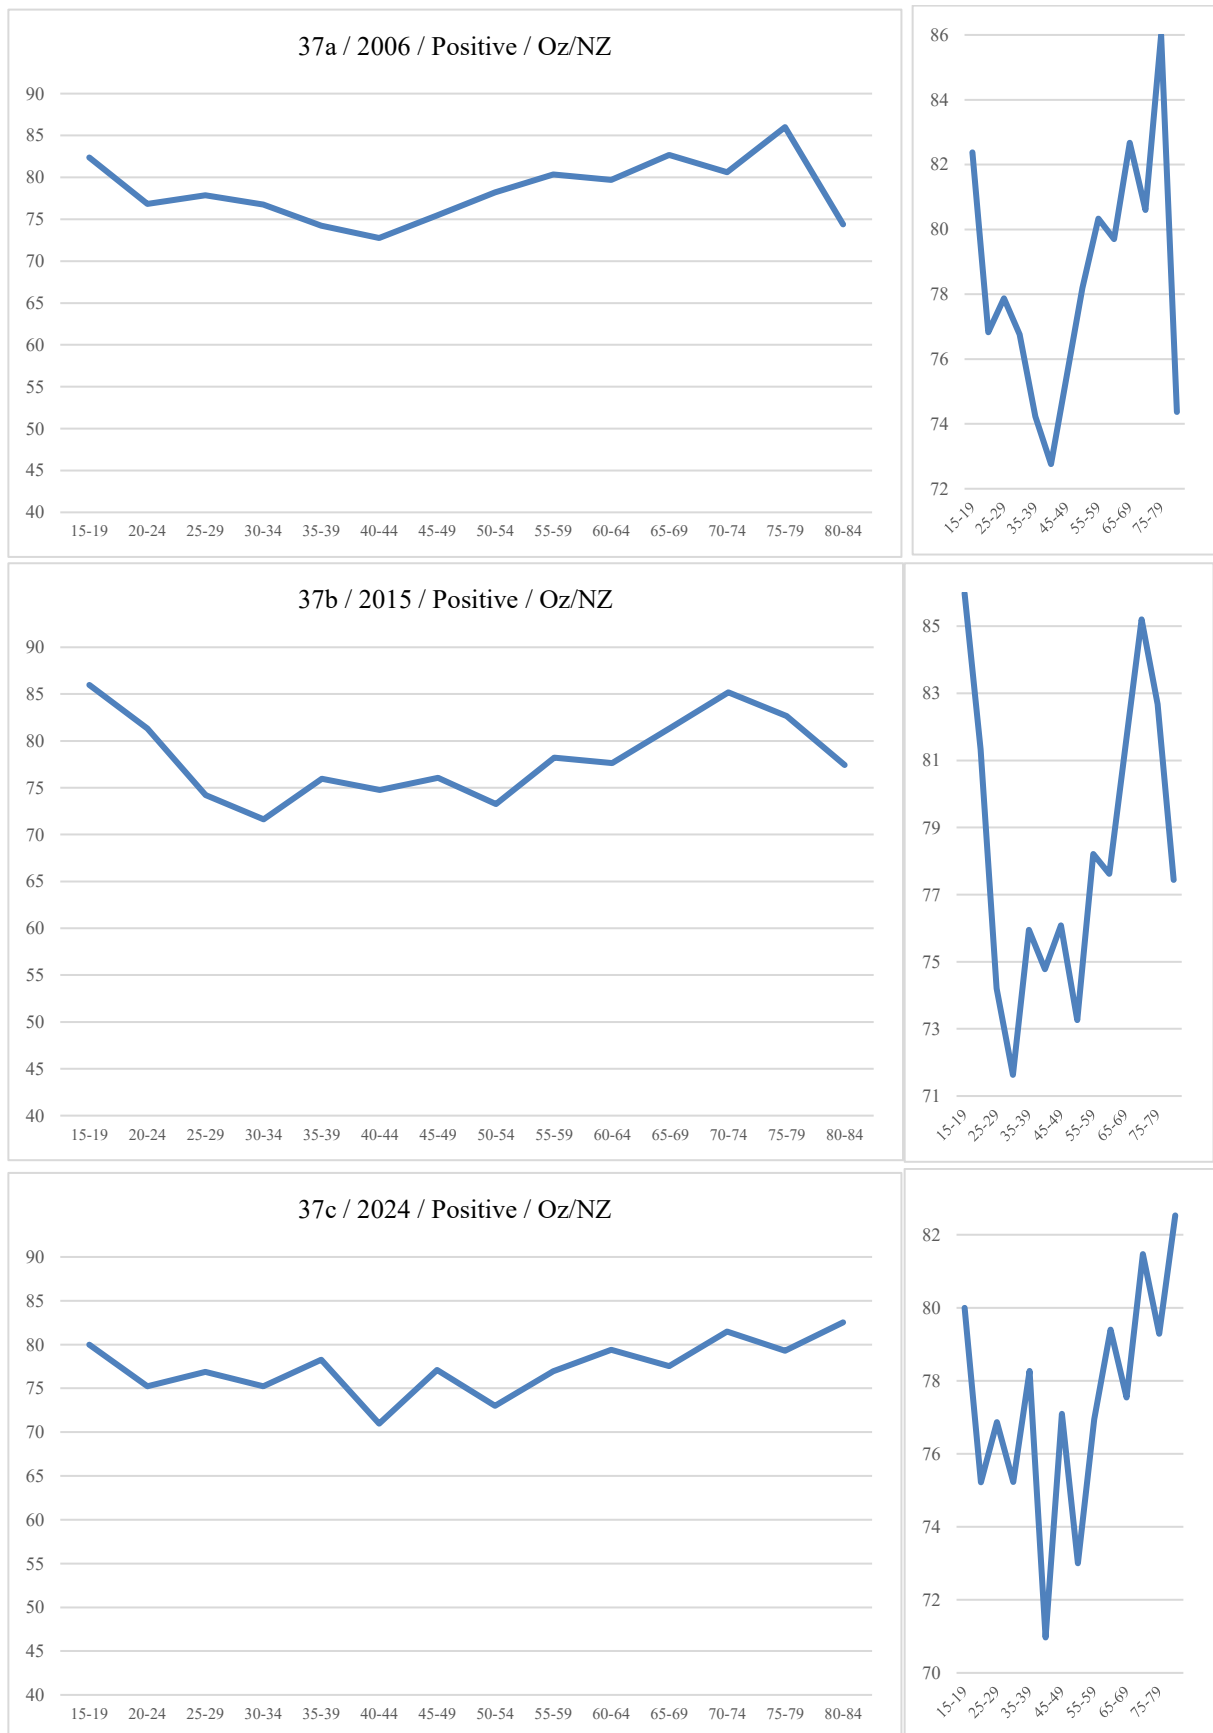

Figures S38a-c. South East Asia Positive Experience means in 2006, 2015, 2024

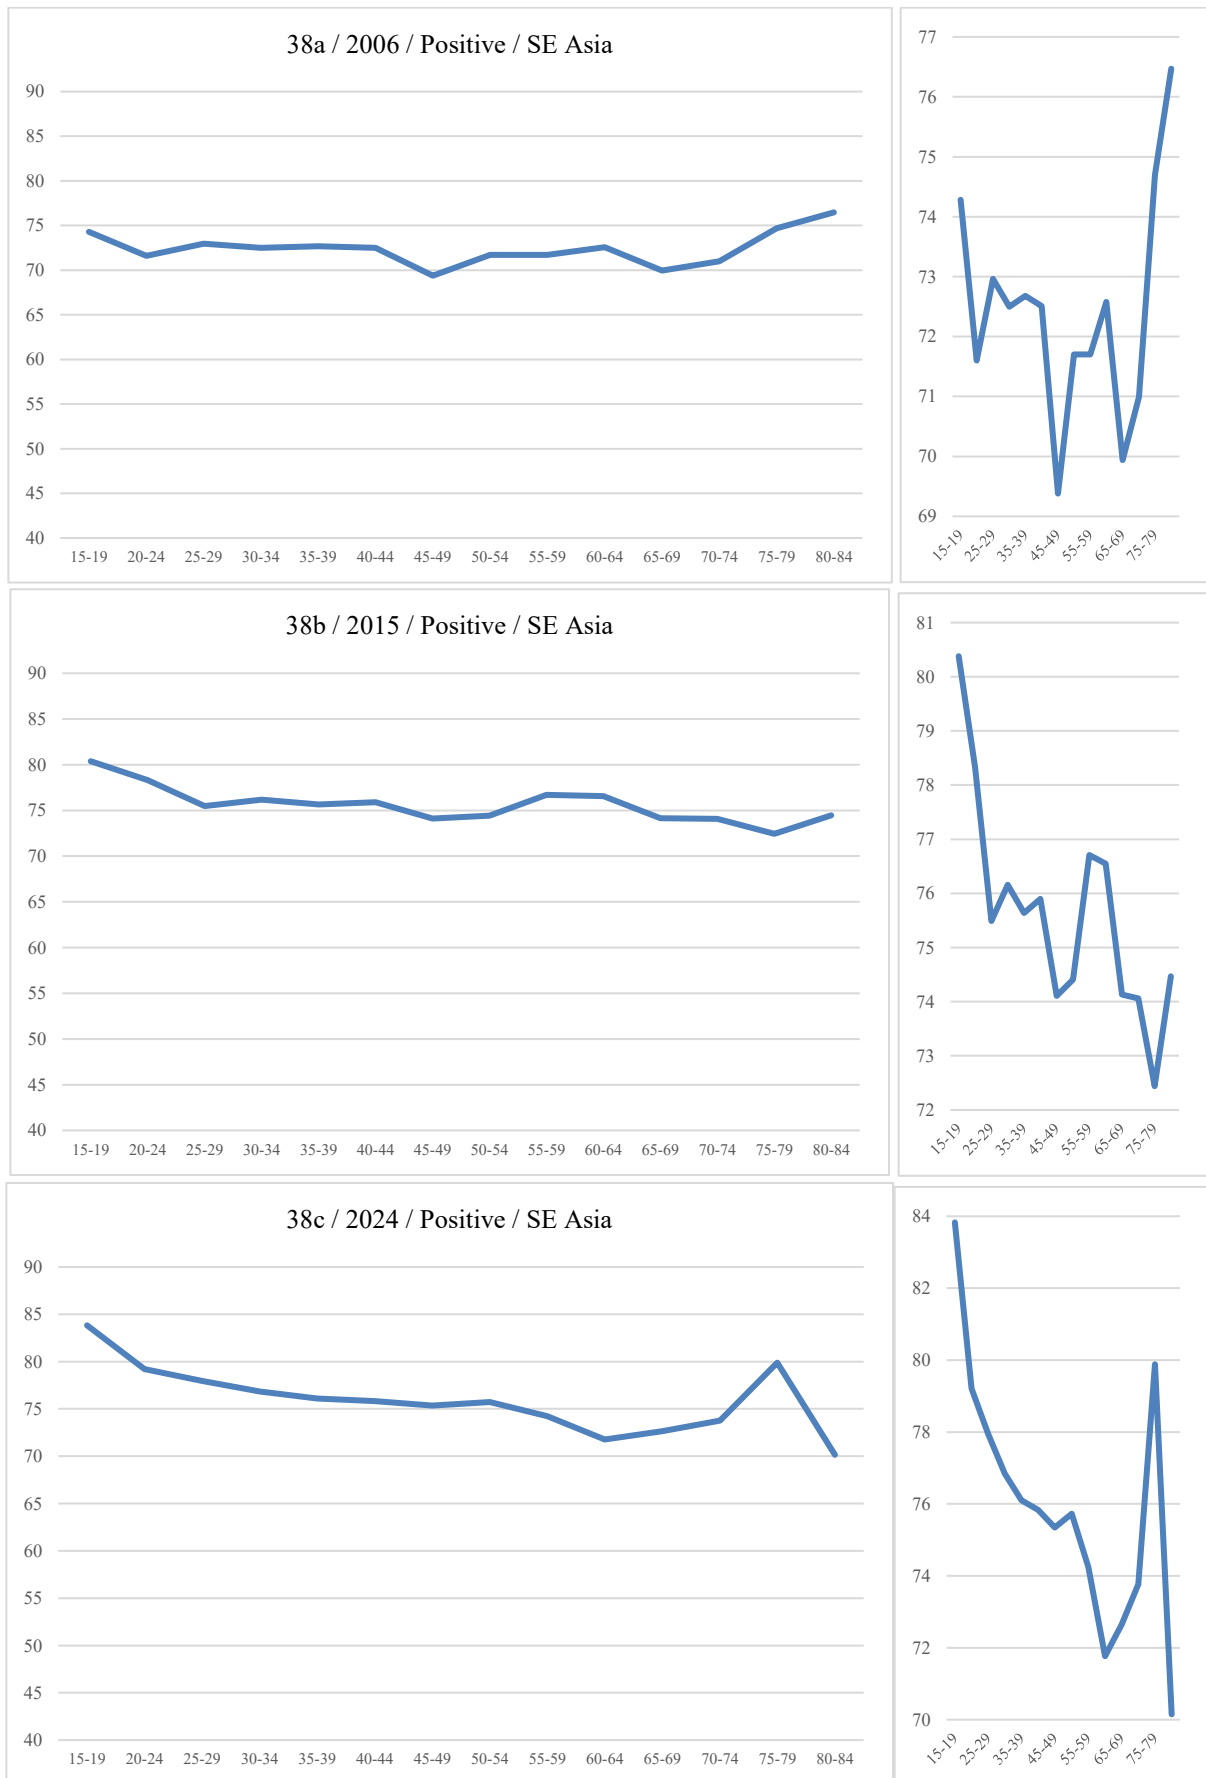

Figures S39a-c. East Asia Positive Experience means in 2006, 2015, and 2024

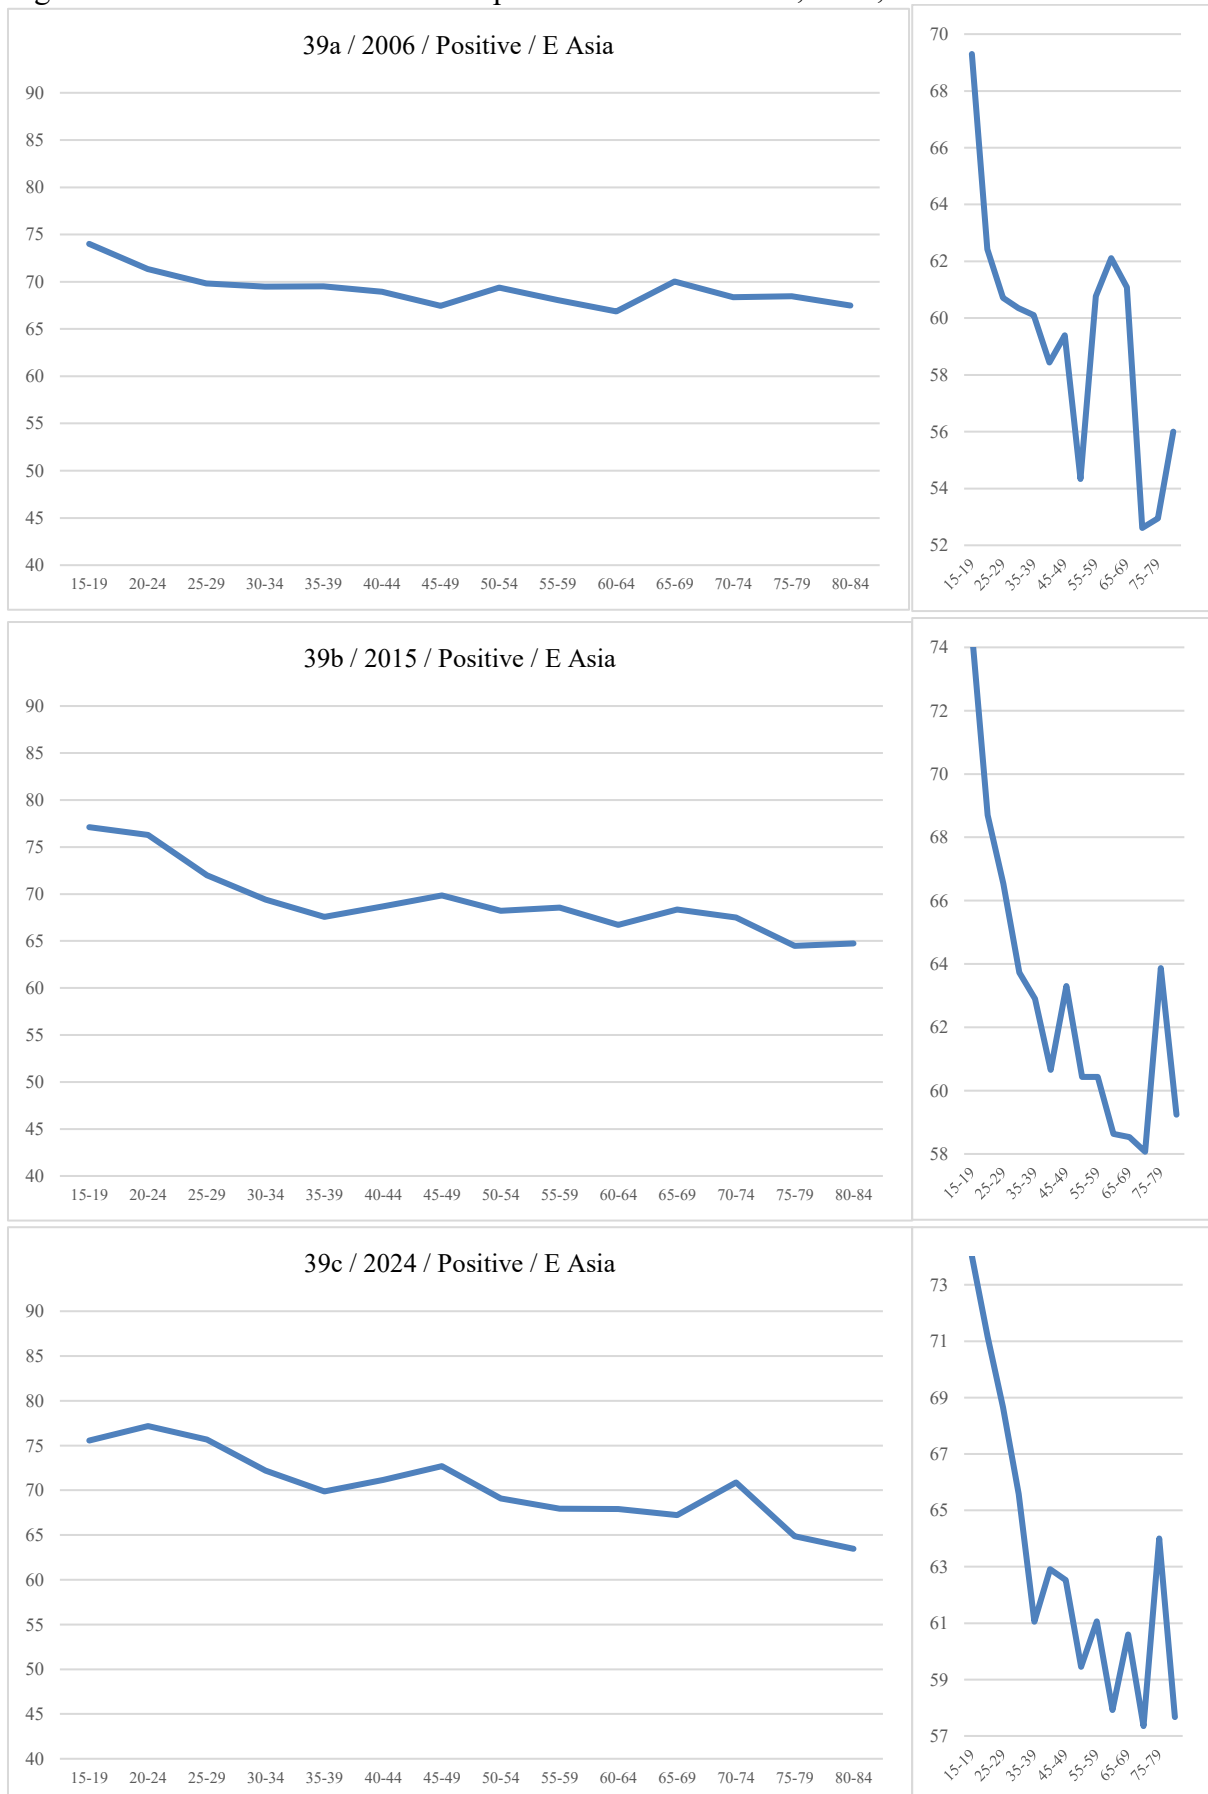

Figures S40a-c. South Asia Positive Experience means in 2006, 2015, and 2024

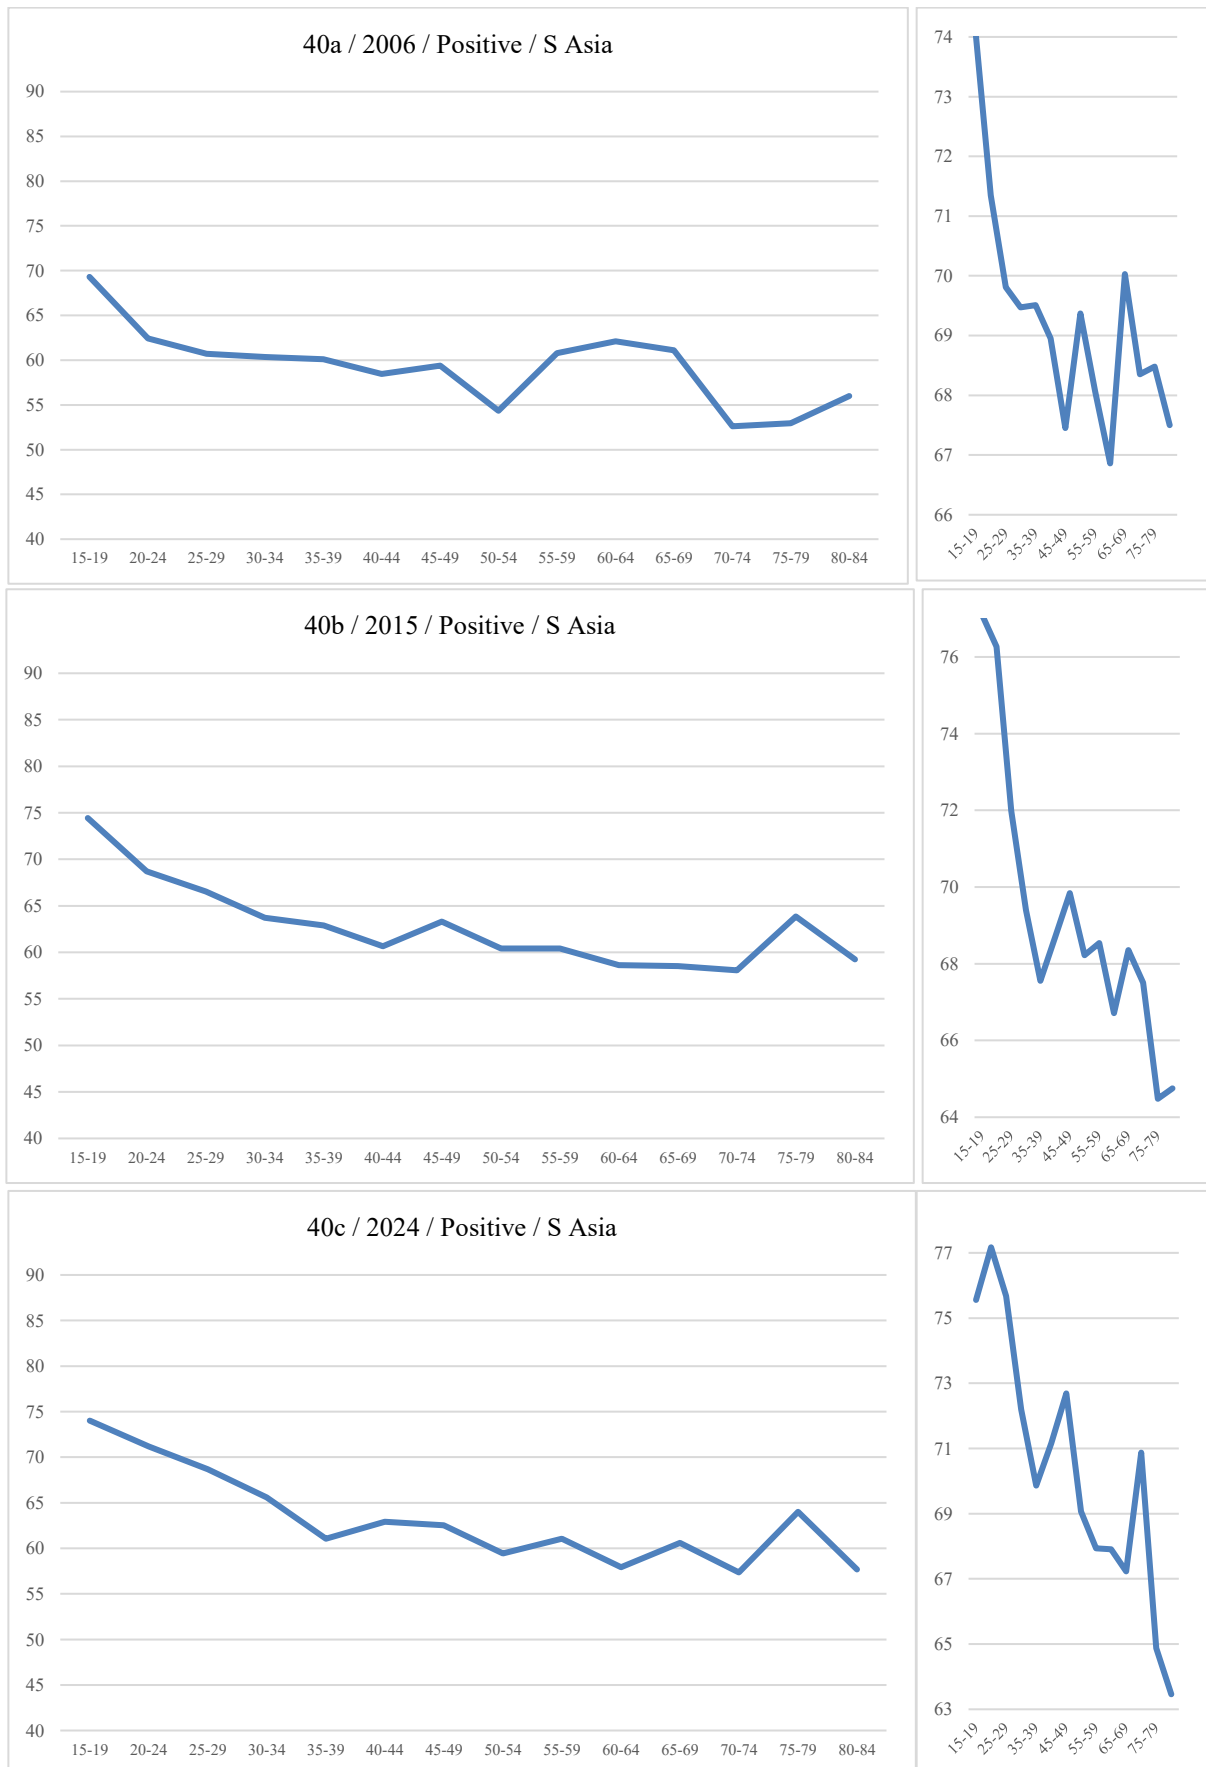

Figures S41a-c. Latin America Positive Experience means in 2006, 2015, and 2024

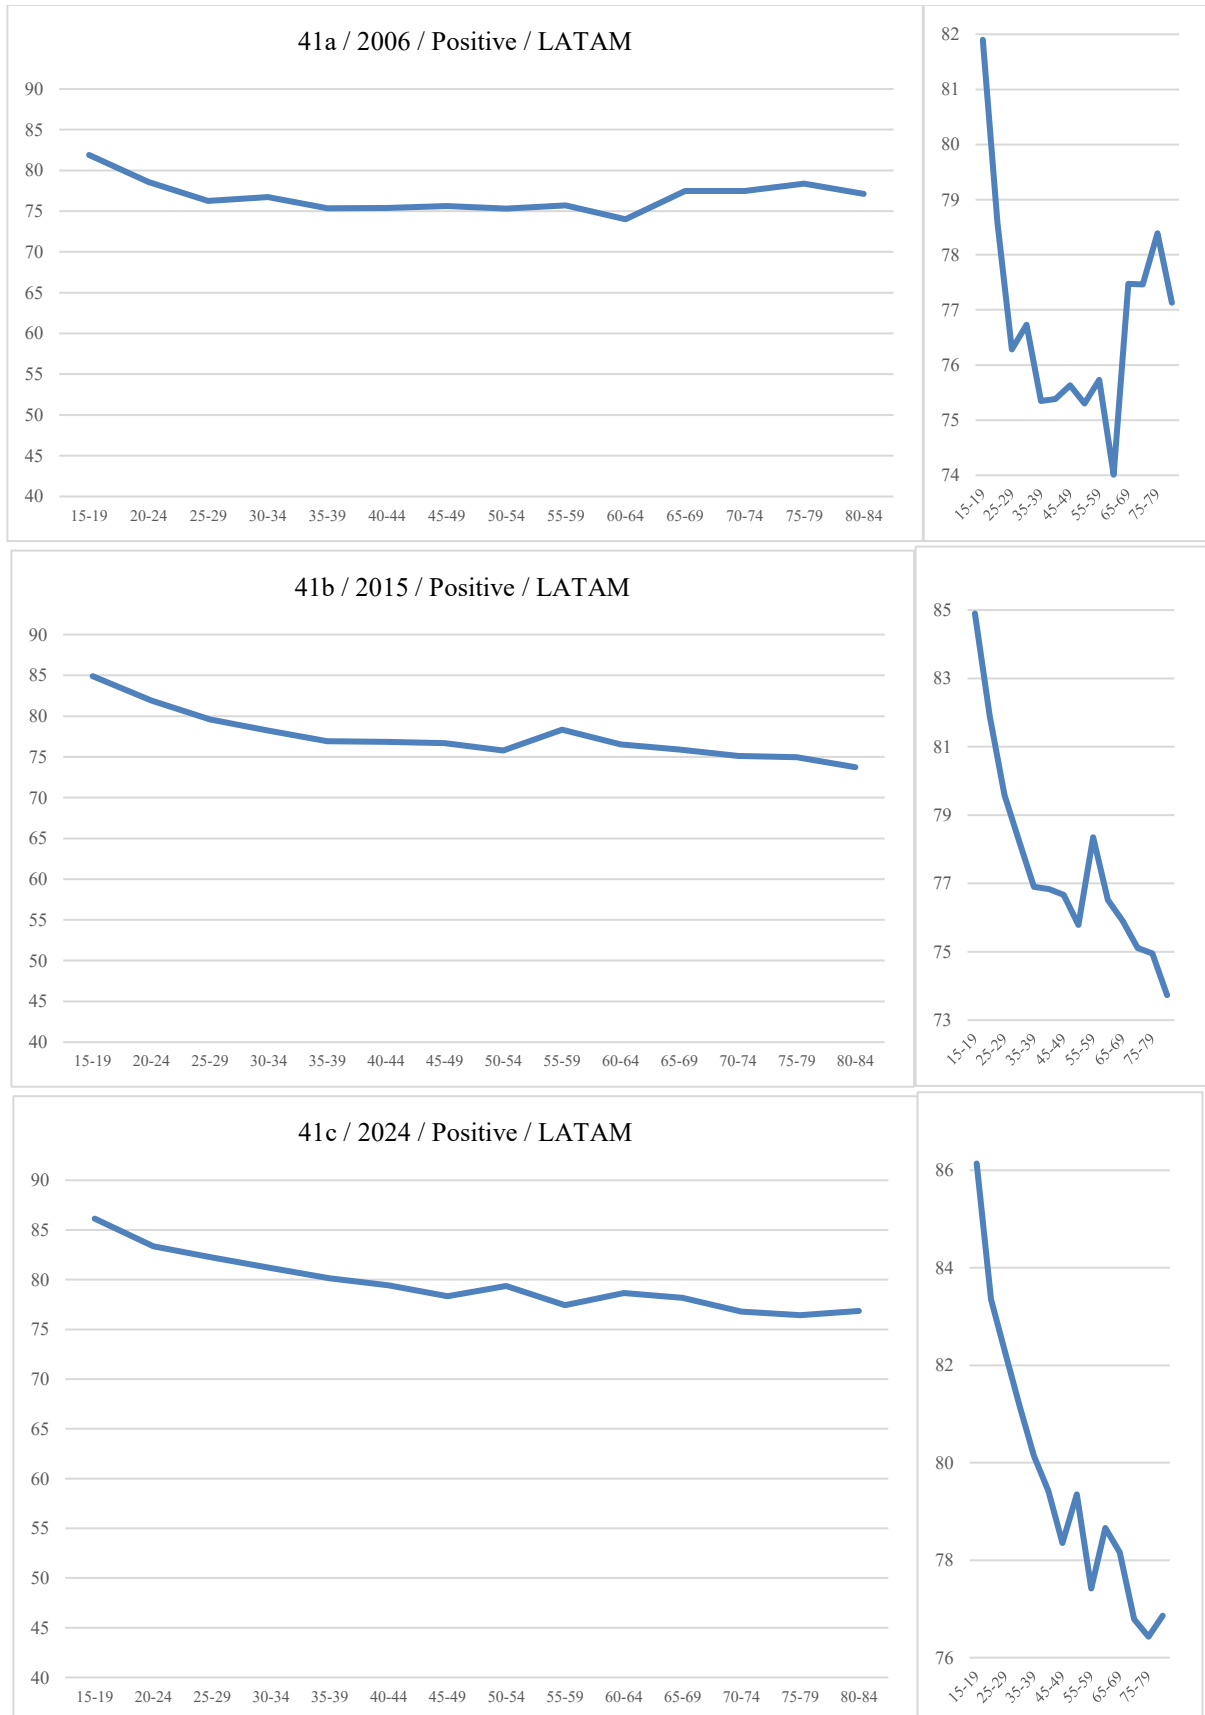

Figures S42a-c. North America Positive Experience means in 2006, 2015, and 2024

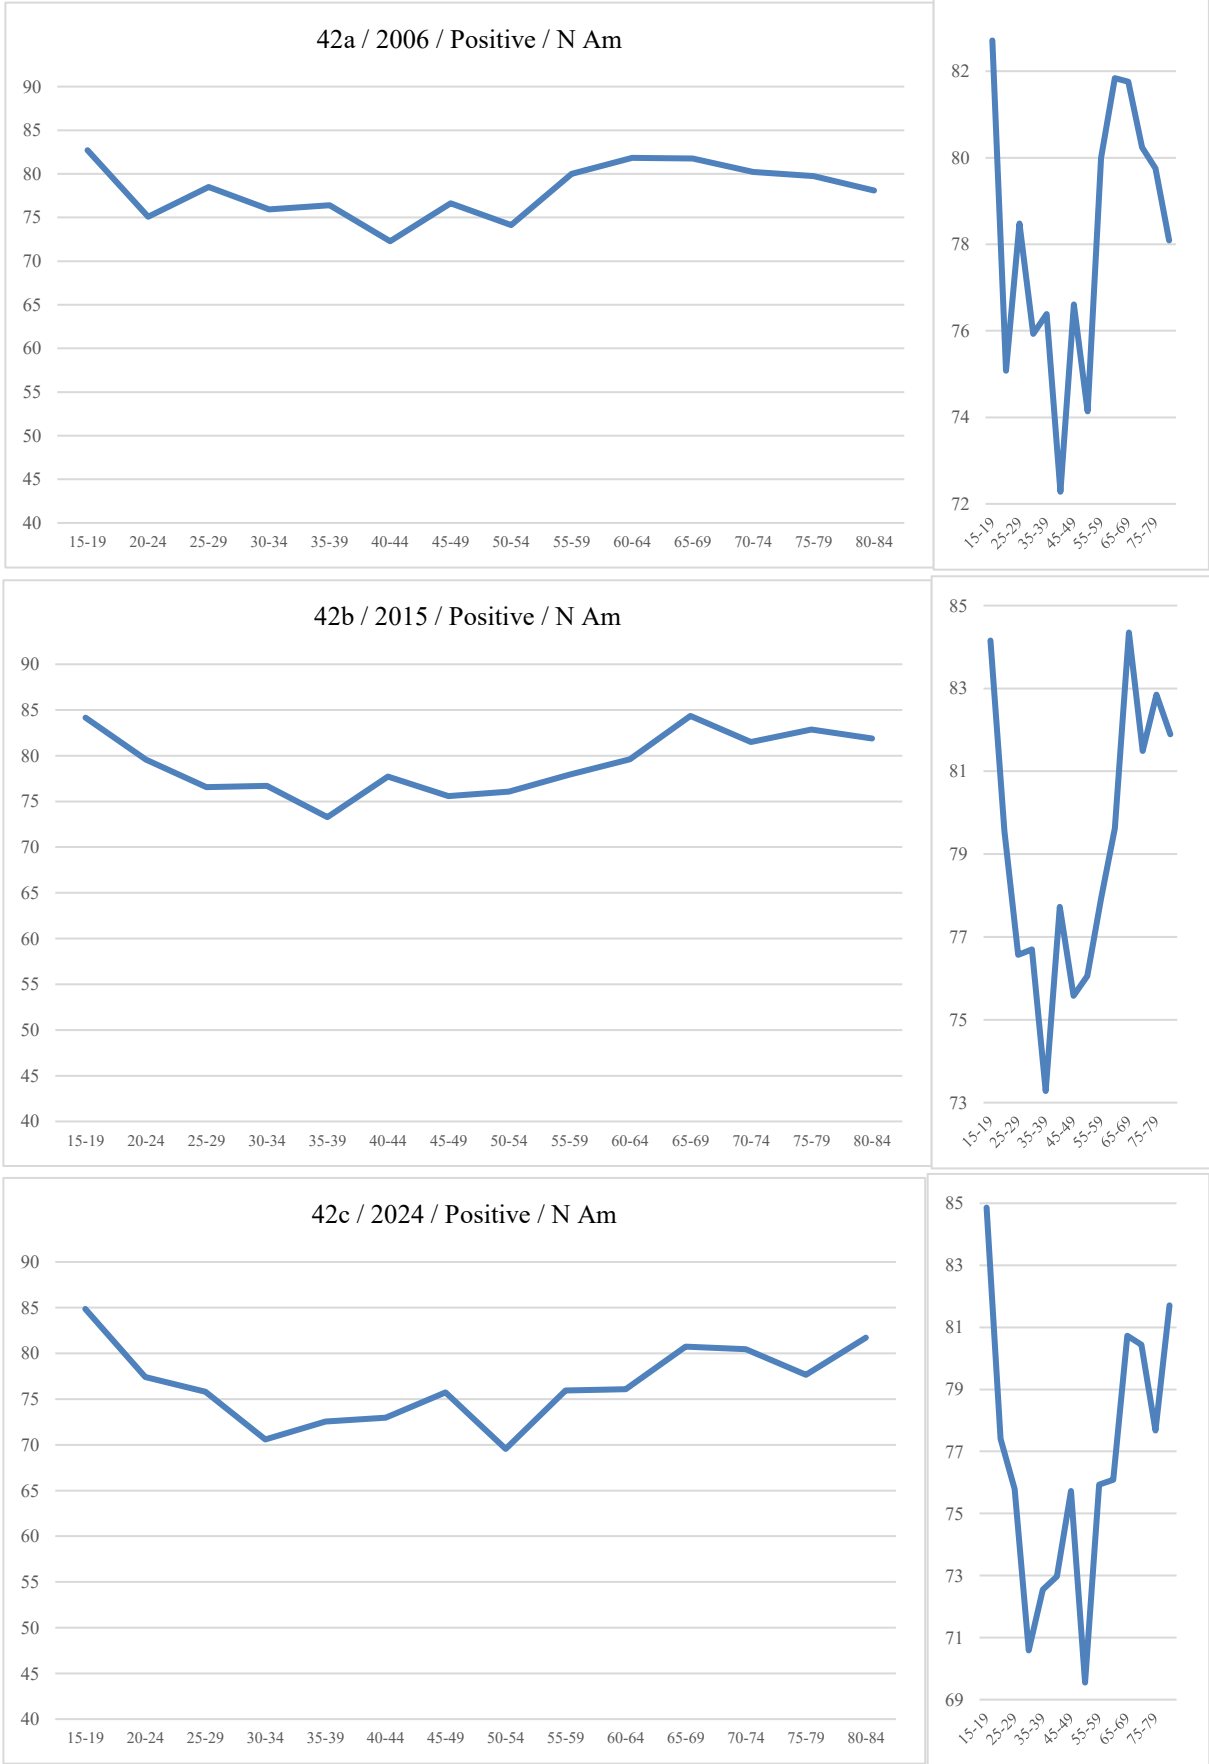

Figures S43a-c. Middle East and North Africa Positive Experience means in 2006, 2015, 2024

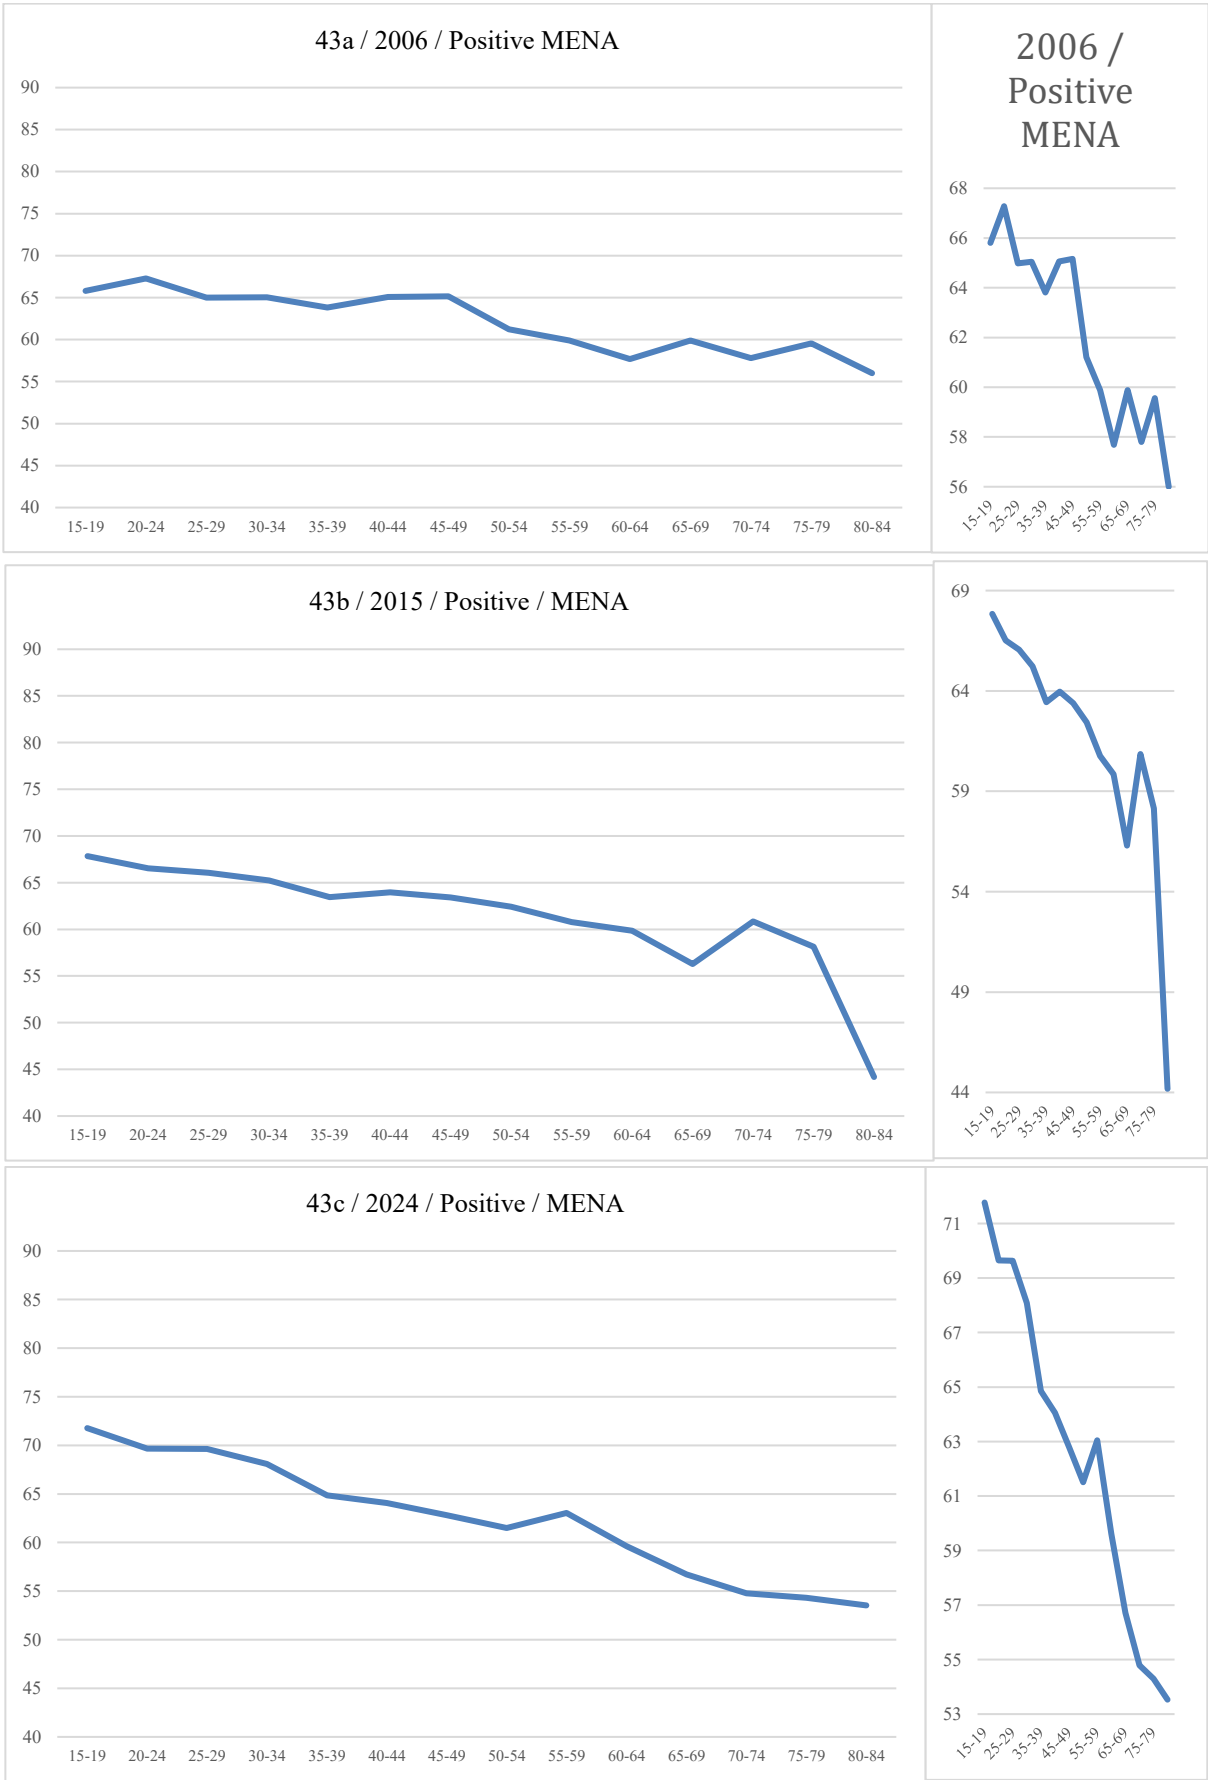

Figures S44a-c. Sub-Saharan Africa Positive Experience means in 2006, 2015, 2024

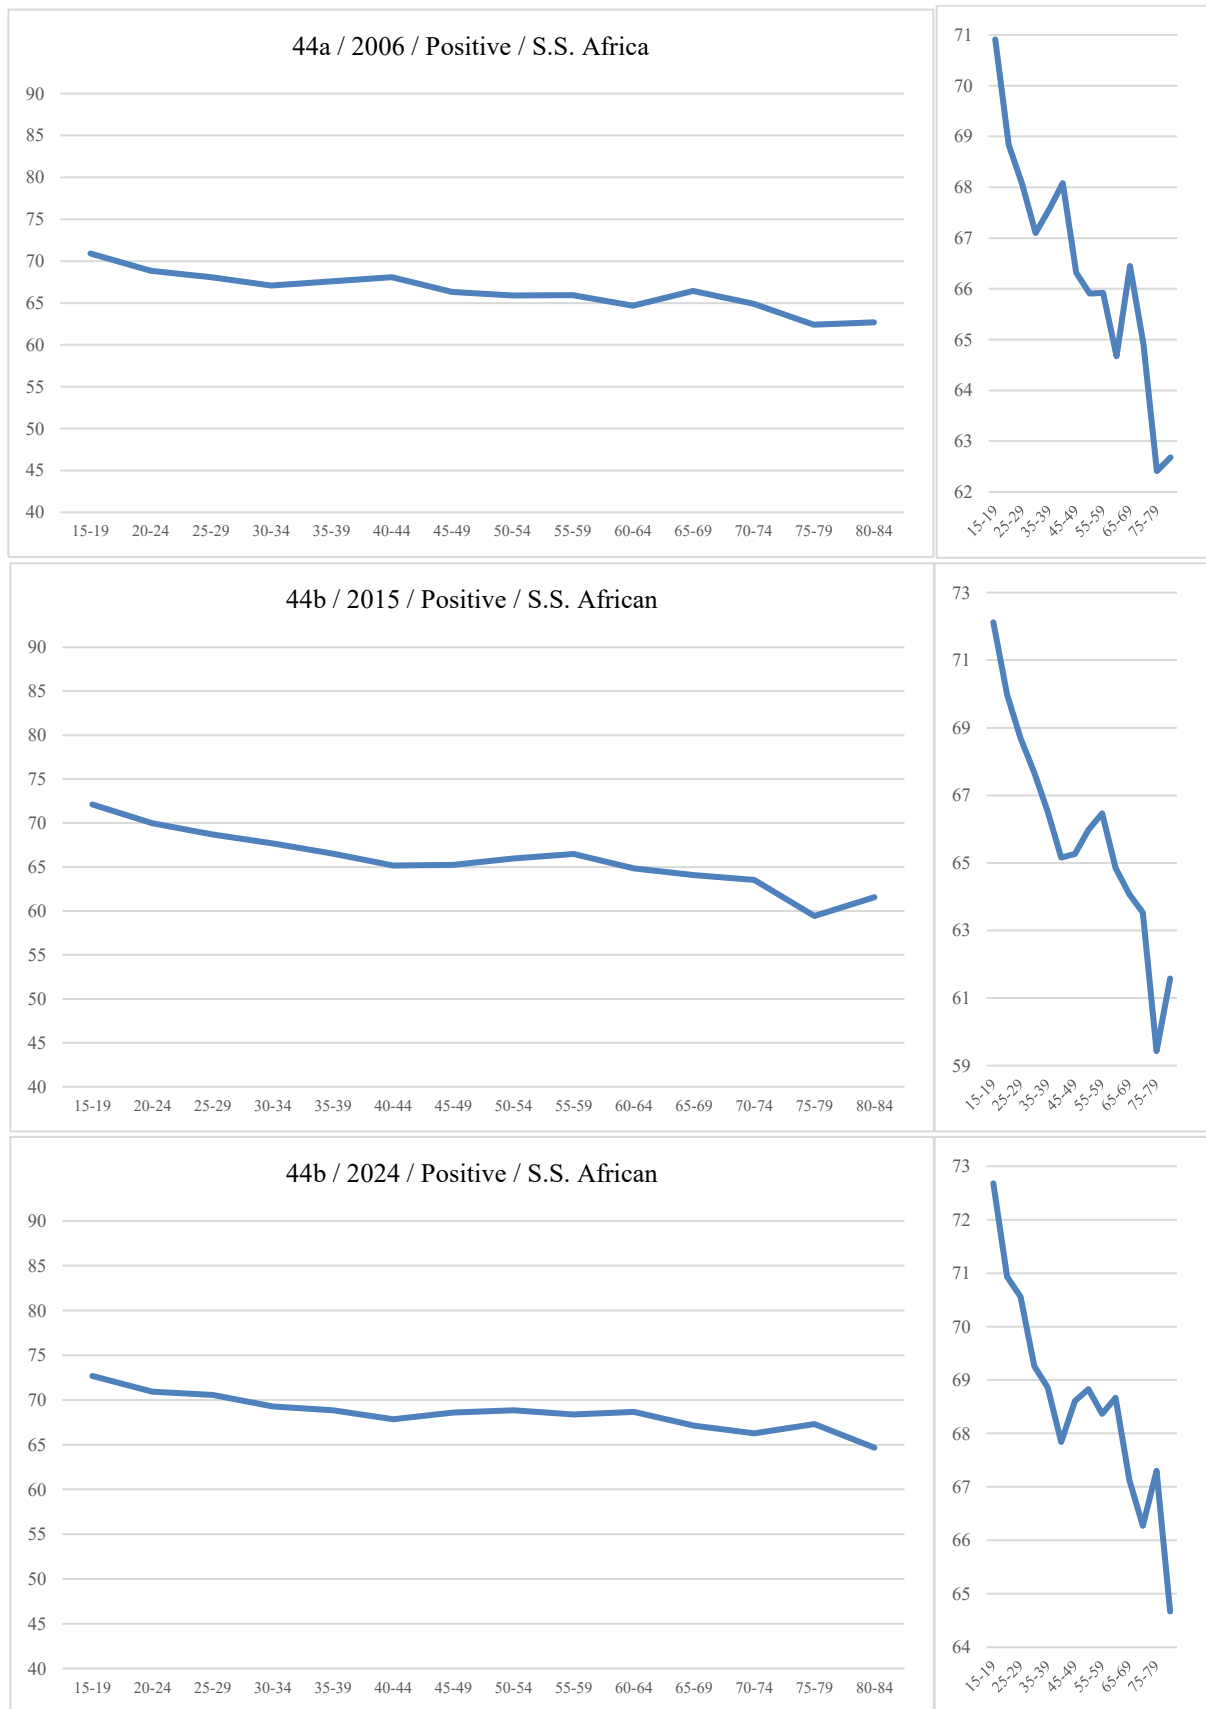

## Tables S6a-fa

Table S6a. Afghanistan Cantril U-shape ratings, 2006-2024

| KPI                | Mean    | 2005    | 2006 | 2007  | 2008 | 2009   | 2010    | 2011    | 2012   | 2013  | 2014    | 2015    | 2016    | 2017   | 2018  | 2019    | 2020  | 2021  | 2022   | 2023   | 2024  |
|--------------------|---------|---------|------|-------|------|--------|---------|---------|--------|-------|---------|---------|---------|--------|-------|---------|-------|-------|--------|--------|-------|
| shape_class        | neither | neither |      | U     |      | U      | neither | neither | U      | U     | neither | neither | neither | J      | J     | neither | U     | J     | U      | J      | J     |
| U_beauty           | 0.02    | 0.00    |      | 0.06  |      | 0.00   | 0.00    | 0.00    | 0.11   | 0.16  | 0.00    | 0.00    | 0.00    | 0.00   | 0.00  | 0.00    | 0.03  | 0.00  | 0.04   | 0.00   | 0.00  |
| J_beauty           | 0.03    | 0.00    |      | 0.00  |      | 0.12   | 0.00    | 0.00    | 0.02   | 0.00  | 0.00    | 0.00    | 0.00    | 0.36   | 0.06  | 0.00    | 0.00  | 0.00  | 0.00   | 0.01   | 0.02  |
| Dominance          | -0.13   |         |      | 0.91  |      | -0.94  |         |         | 0.74   | 0.96  |         |         | -1.00   | -1.00  | -1.00 |         | 0.95  |       | 1.00   | -1.00  | -1.00 |
| best_df            | 3.94    | 4.00    |      | 5.00  |      | 3.00   | 3.00    | 5.00    | 4.00   | 5.00  | 4.00    | 5.00    | 3.00    | 3.00   | 3.00  | 3.00    | 5.00  | 3.00  | 5.00   | 4.00   | 4.00  |
| p_value            | 0.03    | 0.00    |      | 0.05  |      | 0.00   | 0.41    | 0.00    | 0.00   | 0.01  | 0.00    | 0.00    | 0.00    | 0.11   | 0.03  | 0.00    | 0.00  | 0.00  | 0.00   | 0.00   | 0.00  |
| lr_stat            | 35.61   | 49.85   |      | 17.08 |      | 60.67  | 7.23    | 64.94   | 47.33  | 23.41 | 52.82   | 25.74   | 31.17   | 11.86  | 15.44 | 31.37   | 42.59 | 31.73 | 38.38  | 52.75  | 36.58 |
| linear_aic         | 15.10   | 32.72   |      | 26.81 |      | 25.90  | 14.48   | 45.99   | 4.13   | -1.30 | 20.93   | 12.72   | 10.58   | -13.44 | 4.74  | 10.34   | 17.07 | 17.64 | 8.13   | 18.51  | 15.94 |
| spline_aic         | -4.62   | -1.12   |      | 27.73 |      | -20.77 | 21.24   | -0.95   | -27.20 | -6.71 | -15.90  | 4.98    | -6.59   | -11.30 | 3.30  | -7.03   | -7.52 | -0.09 | -12.25 | -18.25 | -4.63 |
| min_age            | 34.34   |         |      | 71.32 |      | 51.40  |         |         | 39.74  | 42.94 |         | 20.76   |         |        | 21.89 | 21.89   | 35.61 |       | 26.59  | 23.20  | 22.45 |
| min_value          | 6.79    |         |      | 7.26  |      | 7.36   |         |         | 7.32   | 7.20  |         | 6.98    |         |        | 6.61  | 6.92    | 6.73  |       | 6.18   | 6.14   | 6.00  |
| amplitude          | 1.81    | 3.01    |      | 1.72  |      | 2.66   | 0.94    | 4.30    | 1.18   | 0.80  | 2.02    | 1.69    | 1.10    | 1.01   | 1.29  | 1.29    | 1.77  | 1.71  | 1.41   | 2.35   | 2.33  |
| delta_endpoints    | 0.09    | -1.69   |      | 0.89  |      | 2.59   | -0.85   | -4.30   | 0.63   | 0.35  | -1.60   | 1.22    | -1.10   | 1.01   | 0.28  | -0.10   | 1.22  | 0.62  | 0.03   | 1.05   | 1.38  |
| n_minima           | 2.78    | 2.00    |      | 4.00  |      | 2.00   | 2.00    | 4.00    | 3.00   | 3.00  | 3.00    | 4.00    | 2.00    | 1.00   | 1.00  | 3.00    | 5.00  | 2.00  | 3.00   | 3.00   | 3.00  |
| n_maxima           | 2.44    | 2.00    |      | 3.00  |      | 1.00   | 2.00    | 4.00    | 2.00   | 3.00  | 3.00    | 3.00    | 2.00    | 1.00   | 1.00  | 3.00    | 4.00  | 3.00  | 3.00   | 2.00   | 2.00  |
| turning_points     | 5.22    | 4.00    |      | 7.00  |      | 3.00   | 4.00    | 8.00    | 5.00   | 6.00  | 6.00    | 7.00    | 4.00    | 2.00   | 2.00  | 6.00    | 9.00  | 5.00  | 6.00   | 5.00   | 5.00  |
| r_trough           | 0.42    | 1.00    |      | 0.72  |      | 0.46   | 1.00    | 1.00    | 0.30   | 0.35  | 1.00    | 0.05    | 1.00    | 0.00   | 0.07  | 0.07    | 0.25  | 0.00  | 0.13   | 0.08   | 0.07  |
| interior_indicator | False   | 0.00    |      | 1.00  |      | 1.00   | 0.00    | 0.00    | 1.00   | 1.00  | 0.00    | 0.00    | 0.00    | 0.00   | 0.00  | 0.00    | 1.00  | 0.00  | 1.00   | 0.00   | 0.00  |
| trough_indicator   | True    | 0.00    |      | 1.00  |      | 1.00   | 0.00    | 0.00    | 1.00   | 1.00  | 0.00    | 1.00    | 0.00    | 0.00   | 1.00  | 1.00    | 1.00  | 0.00  | 1.00   | 1.00   | 1.00  |
| U_D_depth          | 0.25    | 0.00    |      | 0.48  |      | 0.03   | 0.00    | 0.00    | 0.47   | 0.56  | 0.00    | 0.27    | 0.00    | 0.00   | 0.29  | 0.26    | 0.31  | 0.00  | 0.84   | 0.55   | 0.41  |
| U_I_interiority    | 0.16    | 0.00    |      | 0.44  |      | 0.90   | 0.00    | 0.00    | 0.51   | 0.61  | 0.00    | 0.00    | 0.00    | 0.00   | 0.00  | 0.00    | 0.37  | 0.00  | 0.07   | 0.00   | 0.00  |
| U_M_monotonicity   | 0.48    | 0.00    |      | 0.57  |      | 0.82   | 0.00    | 0.00    | 0.74   | 0.74  | 0.00    | 0.74    | 0.00    | 0.00   | 0.94  | 0.80    | 0.61  | 0.00  | 0.87   | 0.87   | 0.87  |
| U_C_convexity      | 0.46    | 0.00    |      | 0.65  |      | 1.00   | 0.00    | 0.00    | 0.76   | 0.78  | 0.00    | 0.63    | 0.00    | 0.00   | 0.83  | 0.76    | 0.61  | 0.00  | 0.90   | 0.73   | 0.71  |
| U_S_symmetry       | 0.38    | 0.00    |      | 0.65  |      | 0.05   | 0.00    | 0.00    | 0.64   | 0.72  | 0.00    | 0.43    | 0.00    | 0.00   | 0.73  | 0.87    | 0.47  | 0.00  | 0.99   | 0.71   | 0.58  |
| J_R_rise           | 0.36    | 0.00    |      | 0.52  |      | 0.97   | 0.00    | 0.00    | 0.53   | 0.44  | 0.00    | 0.73    | 0.00    | 1.00   | 0.21  | 0.00    | 0.69  | 0.36  | 0.02   | 0.45   | 0.59  |
| J_M_monotonicity   | 0.59    | 0.43    |      | 0.56  |      | 0.70   | 0.38    | 0.47    | 0.65   | 0.47  | 0.50    | 0.53    | 0.58    | 0.81   | 0.82  | 0.60    | 0.52  | 0.62  | 0.66   | 0.70   | 0.69  |
| J_C_rightconvex    | 0.46    | 0.52    |      | 0.56  |      | 0.63   | 0.44    | 0.31    | 0.90   | 0.65  | 0.51    | 0.48    | 0.30    | 1.00   | 0.31  | 0.00    | 0.58  | 0.00  | 0.00   | 0.61   | 0.50  |
| P_turning          | 0.11    | 0.12    |      | 0.01  |      | 0.25   | 0.12    | 0.01    | 0.06   | 0.03  | 0.03    | 0.01    | 0.12    | 0.50   | 0.50  | 0.03    | 0.00  | 0.06  | 0.03   | 0.06   | 0.06  |
| final_structure    | neither | neither |      | U     |      | U      | neither | neither | U      | U     | neither | neither | neither | J      | J     | neither | U     | J     | U      | J      | J     |
| U_supported        | False   | 0.00    |      | 1.00  |      | 1.00   | 0.00    | 0.00    | 1.00   | 1.00  | 0.00    | 0.00    | 0.00    | 0.00   | 0.00  | 0.00    | 1.00  | 0.00  | 1.00   | 0.00   | 0.00  |
| J_supported        | False   | 0.00    |      | 0.00  |      | 0.00   | 0.00    | 0.00    | 0.00   | 0.00  | 0.00    | 0.00    | 0.00    | 1.00   | 1.00  | 0.00    | 0.00  | 1.00  | 0.00   | 1.00   | 1.00  |

Table S6b. Albania Cantril U-shape ratings, 2006-2024

| KPI         | Mean    | 2005 | 2006 | 2007    | 2008 | 2009 | 2010 | 2011 | 2012 | 2013 | 2014    | 2015 | 2016    | 2017    | 2018    | 2019 | 2020 | 2021 | 2022    | 2023    | 2024    |
|-------------|---------|------|------|---------|------|------|------|------|------|------|---------|------|---------|---------|---------|------|------|------|---------|---------|---------|
| shape_class | neither |      |      | neither |      |      |      |      |      |      | neither | U    | neither | neither | neither | U    |      |      | neither | neither | neither |
| U_beauty    | 0.03    |      |      | 0.00    |      |      |      |      |      |      | 0.00    | 0.16 | 0.00    | 0.00    | 0.00    | 0.17 |      |      | 0.00    | 0.00    | 0.00    |
| J_beauty    | 0.00    |      |      | 0.01    |      |      |      |      |      |      | 0.00    | 0.00 | 0.00    | 0.00    | 0.00    | 0.00 |      |      | 0.00    | 0.00    | 0.00    |

|                           |         |         |  |  |  |         |        |         |         |         |        |      |      |      |      |  |  |  |         |         |         |  |
|---------------------------|---------|---------|--|--|--|---------|--------|---------|---------|---------|--------|------|------|------|------|--|--|--|---------|---------|---------|--|
| <b>Dominance</b>          | 0.32    | -1.00   |  |  |  | 0.95    |        |         |         |         |        |      |      |      | 1.00 |  |  |  |         |         |         |  |
| <b>best_df</b>            | 4.50    | 5.00    |  |  |  | 5.00    | 5.00   | 5.00    | 5.00    | 5.00    | 5.00   | 5.00 | 5.00 | 5.00 | 5.00 |  |  |  | 3.00    | 3.00    | 4.00    |  |
| <b>p_value</b>            | 0.04    | 0.00    |  |  |  | 0.00    | 0.00   | 0.00    | 0.00    | 0.00    | 0.00   | 0.00 | 0.00 | 0.00 | 0.00 |  |  |  | 0.36    | 0.00    | 0.00    |  |
| <b>lr_stat</b>            | 48.91   | 80.29   |  |  |  | 32.34   | 83.84  | 36.34   | 31.77   | 55.58   | 63.24  |      |      |      |      |  |  |  | 7.68    | 57.50   | 40.55   |  |
| <b>linear_aic</b>         | 36.30   | 51.14   |  |  |  | 36.81   | 54.76  | 37.23   | 22.52   | 45.17   | 26.19  |      |      |      |      |  |  |  | 16.14   | 39.70   | 33.35   |  |
| <b>spline_aic</b>         | 4.39    | -11.16  |  |  |  | 22.47   | -11.08 | 18.89   | 8.74    | 7.59    | -19.05 |      |      |      |      |  |  |  | 22.46   | -3.79   | 8.80    |  |
| <b>min_age</b>            | 79.84   | 86.36   |  |  |  |         | 46.51  | 90.50   | 89.18   |         | 73.02  |      |      |      |      |  |  |  | 88.43   | 84.86   |         |  |
| <b>min_value</b>          | 3.50    | 2.50    |  |  |  |         | 3.83   | 2.73    | 3.49    |         | 4.19   |      |      |      |      |  |  |  | 3.68    | 4.11    |         |  |
| <b>amplitude</b>          | 3.47    | 5.50    |  |  |  | 2.46    | 5.17   | 3.55    | 2.56    | 4.67    | 1.86   |      |      |      |      |  |  |  | 2.86    | 2.93    | 3.16    |  |
| <b>delta_endpoints</b>    | -1.17   | 3.08    |  |  |  | -2.26   | 3.06   | -3.29   | -1.92   | -4.19   | -0.38  |      |      |      |      |  |  |  | -2.59   | -0.04   | -3.16   |  |
| <b>n_minima</b>           | 3.10    | 3.00    |  |  |  | 3.00    | 3.00   | 4.00    | 4.00    | 3.00    | 4.00   |      |      |      |      |  |  |  | 2.00    | 3.00    | 2.00    |  |
| <b>n_maxima</b>           | 2.80    | 2.00    |  |  |  | 3.00    | 3.00   | 3.00    | 4.00    | 4.00    | 3.00   |      |      |      |      |  |  |  | 1.00    | 3.00    | 2.00    |  |
| <b>turning_points</b>     | 5.90    | 5.00    |  |  |  | 6.00    | 6.00   | 7.00    | 8.00    | 7.00    | 7.00   |      |      |      |      |  |  |  | 3.00    | 6.00    | 4.00    |  |
| <b>r_trough</b>           | 0.89    | 0.92    |  |  |  | 1.00    | 0.39   | 0.98    | 0.96    | 1.00    | 0.75   |      |      |      |      |  |  |  | 0.95    | 0.90    | 1.00    |  |
| <b>interior_indicator</b> | False   | 0.00    |  |  |  | 0.00    | 1.00   | 0.00    | 0.00    | 0.00    | 1.00   |      |      |      |      |  |  |  | 0.00    | 0.00    | 0.00    |  |
| <b>trough_indicator</b>   | True    | 1.00    |  |  |  | 0.00    | 1.00   | 1.00    | 1.00    | 0.00    | 1.00   |      |      |      |      |  |  |  | 1.00    | 1.00    | 0.00    |  |
| <b>U_D_depth</b>          | 0.30    | 0.44    |  |  |  | 0.00    | 0.41   | 0.07    | 0.20    | 0.00    | 0.79   |      |      |      |      |  |  |  | 0.09    | 0.98    | 0.00    |  |
| <b>U_I_interiority</b>    | 0.11    | 0.00    |  |  |  | 0.00    | 0.73   | 0.00    | 0.00    | 0.00    | 0.38   |      |      |      |      |  |  |  | 0.00    | 0.00    | 0.00    |  |
| <b>U_M_monotonicity</b>   | 0.57    | 0.82    |  |  |  | 0.00    | 0.80   | 0.78    | 0.77    | 0.00    | 0.78   |      |      |      |      |  |  |  | 0.90    | 0.80    | 0.00    |  |
| <b>U_C_convexity</b>      | 0.55    | 0.66    |  |  |  | 0.00    | 1.00   | 0.67    | 0.67    | 0.10    | 0.71   |      |      |      |      |  |  |  | 0.88    | 0.77    | 0.00    |  |
| <b>U_S_symmetry</b>       | 0.37    | 0.61    |  |  |  | 0.00    | 0.58   | 0.14    | 0.34    | 0.00    | 0.88   |      |      |      |      |  |  |  | 0.17    | 0.99    | 0.00    |  |
| <b>J_R_rise</b>           | 0.12    | 0.56    |  |  |  | 0.00    | 0.59   | 0.00    | 0.00    | 0.00    | 0.00   |      |      |      |      |  |  |  | 0.00    | 0.00    | 0.00    |  |
| <b>J_M_monotonicity</b>   | 0.40    | 0.37    |  |  |  | 0.46    | 0.45   | 0.41    | 0.43    | 0.44    | 0.55   |      |      |      |      |  |  |  | 0.22    | 0.42    | 0.25    |  |
| <b>J_C_rightconvex</b>    | 0.51    | 0.53    |  |  |  | 0.47    | 0.58   | 0.50    | 0.51    | 0.21    | 0.64   |      |      |      |      |  |  |  | 0.52    | 0.60    | 0.52    |  |
| <b>P_turning</b>          | 0.06    | 0.06    |  |  |  | 0.03    | 0.03   | 0.01    | 0.01    | 0.01    | 0.01   |      |      |      |      |  |  |  | 0.25    | 0.03    | 0.12    |  |
| <b>final_structure</b>    | neither | neither |  |  |  | neither | U      | neither | neither | neither | U      |      |      |      |      |  |  |  | neither | neither | neither |  |
| <b>U_supported</b>        | False   | 0.00    |  |  |  | 0.00    | 1.00   | 0.00    | 0.00    | 0.00    | 1.00   |      |      |      |      |  |  |  | 0.00    | 0.00    | 0.00    |  |
| <b>J_supported</b>        | False   | 0.00    |  |  |  | 0.00    | 0.00   | 0.00    | 0.00    | 0.00    | 0.00   |      |      |      |      |  |  |  | 0.00    | 0.00    | 0.00    |  |

Table S6c. Algeria Cantril U-shape ratings, 2006-2024

| KPI                    | Mean    | 2005 | 2006 | 2007 | 2008 | 2009 | 2010 | 2011 | 2012 | 2013 | 2014 | 2015 | 2016 | 2017 | 2018    | 2019  | 2020 | 2021 | 2022    | 2023 | 2024 |
|------------------------|---------|------|------|------|------|------|------|------|------|------|------|------|------|------|---------|-------|------|------|---------|------|------|
| <b>shape_class</b>     | neither |      |      |      |      |      |      |      |      |      |      |      |      |      | neither | U     |      |      | neither |      |      |
| <b>U_beauty</b>        | 0.00    |      |      |      |      |      |      |      |      |      |      |      |      |      | 0.00    | 0.01  |      |      | 0.00    |      |      |
| <b>J_beauty</b>        | 0.02    |      |      |      |      |      |      |      |      |      |      |      |      |      | 0.00    | 0.05  |      |      | 0.00    |      |      |
| <b>Dominance</b>       | -0.81   |      |      |      |      |      |      |      |      |      |      |      |      |      |         | -0.81 |      |      |         |      |      |
| <b>best_df</b>         | 4.33    |      |      |      |      |      |      |      |      |      |      |      |      |      | 5.00    | 3.00  |      |      | 5.00    |      |      |
| <b>p_value</b>         | 0.00    |      |      |      |      |      |      |      |      |      |      |      |      |      | 0.00    | 0.00  |      |      | 0.00    |      |      |
| <b>lr_stat</b>         | 36.91   |      |      |      |      |      |      |      |      |      |      |      |      |      | 39.98   | 23.98 |      |      | 46.76   |      |      |
| <b>linear_aic</b>      | 42.53   |      |      |      |      |      |      |      |      |      |      |      |      |      | 41.37   | 31.53 |      |      | 54.69   |      |      |
| <b>spline_aic</b>      | 22.29   |      |      |      |      |      |      |      |      |      |      |      |      |      | 19.38   | 21.55 |      |      | 25.92   |      |      |
| <b>min_age</b>         | 75.27   |      |      |      |      |      |      |      |      |      |      |      |      |      |         | 75.27 |      |      |         |      |      |
| <b>min_value</b>       | 4.59    |      |      |      |      |      |      |      |      |      |      |      |      |      |         | 4.59  |      |      |         |      |      |
| <b>amplitude</b>       | 3.97    |      |      |      |      |      |      |      |      |      |      |      |      |      | 3.91    | 2.46  |      |      | 5.53    |      |      |
| <b>delta_endpoints</b> | -1.69   |      |      |      |      |      |      |      |      |      |      |      |      |      | -2.52   | 2.27  |      |      | -4.81   |      |      |

|                           |         |  |  |  |  |  |  |  |  |  |  |  |  |         |      |  |  |  |         |
|---------------------------|---------|--|--|--|--|--|--|--|--|--|--|--|--|---------|------|--|--|--|---------|
| <b>n_minima</b>           | 3.00    |  |  |  |  |  |  |  |  |  |  |  |  | 4.00    | 2.00 |  |  |  | 3.00    |
| <b>n_maxima</b>           | 3.00    |  |  |  |  |  |  |  |  |  |  |  |  | 4.00    | 2.00 |  |  |  | 3.00    |
| <b>turning_points</b>     | 6.00    |  |  |  |  |  |  |  |  |  |  |  |  | 8.00    | 4.00 |  |  |  | 6.00    |
| <b>r_trough</b>           | 0.93    |  |  |  |  |  |  |  |  |  |  |  |  | 1.00    | 0.78 |  |  |  | 1.00    |
| <b>interior_indicator</b> | False   |  |  |  |  |  |  |  |  |  |  |  |  | 0.00    | 1.00 |  |  |  | 0.00    |
| <b>trough_indicator</b>   | False   |  |  |  |  |  |  |  |  |  |  |  |  | 0.00    | 1.00 |  |  |  | 0.00    |
| <b>U_D_depth</b>          | 0.03    |  |  |  |  |  |  |  |  |  |  |  |  | 0.00    | 0.08 |  |  |  | 0.00    |
| <b>U_I_interiority</b>    | 0.10    |  |  |  |  |  |  |  |  |  |  |  |  | 0.00    | 0.31 |  |  |  | 0.00    |
| <b>U_M_monotonicity</b>   | 0.24    |  |  |  |  |  |  |  |  |  |  |  |  | 0.00    | 0.72 |  |  |  | 0.00    |
| <b>U_C_convexity</b>      | 0.45    |  |  |  |  |  |  |  |  |  |  |  |  | 0.00    | 0.91 |  |  |  | 0.45    |
| <b>U_S_symmetry</b>       | 0.05    |  |  |  |  |  |  |  |  |  |  |  |  | 0.00    | 0.15 |  |  |  | 0.00    |
| <b>J_R_rise</b>           | 0.31    |  |  |  |  |  |  |  |  |  |  |  |  | 0.00    | 0.92 |  |  |  | 0.00    |
| <b>J_M_monotonicity</b>   | 0.53    |  |  |  |  |  |  |  |  |  |  |  |  | 0.60    | 0.60 |  |  |  | 0.39    |
| <b>J_C_rightconvex</b>    | 0.59    |  |  |  |  |  |  |  |  |  |  |  |  | 0.43    | 1.00 |  |  |  | 0.34    |
| <b>P_turning</b>          | 0.05    |  |  |  |  |  |  |  |  |  |  |  |  | 0.01    | 0.12 |  |  |  | 0.03    |
| <b>final_structure</b>    | neither |  |  |  |  |  |  |  |  |  |  |  |  | neither | U    |  |  |  | neither |
| <b>U_supported</b>        | False   |  |  |  |  |  |  |  |  |  |  |  |  | 0.00    | 1.00 |  |  |  | 0.00    |
| <b>J_supported</b>        | False   |  |  |  |  |  |  |  |  |  |  |  |  | 0.00    | 0.00 |  |  |  | 0.00    |

Table S6d. Argentina Cantril U-shape ratings, 2006-2024

| KPI                       | Mean    | 2005 | 2006    | 2007  | 2008    | 2009 | 2010  | 2011    | 2012    | 2013 | 2014    | 2015    | 2016    | 2017  | 2018    | 2019 | 2020 | 2021  | 2022    | 2023    | 2024    |
|---------------------------|---------|------|---------|-------|---------|------|-------|---------|---------|------|---------|---------|---------|-------|---------|------|------|-------|---------|---------|---------|
| <b>shape_class</b>        | neither |      | neither | U     | neither |      | U     | neither | neither |      | neither | neither | neither | U     | neither |      |      | U     | neither | neither | neither |
| <b>U_beauty</b>           | 0.02    |      | 0.00    | 0.15  | 0.00    |      | 0.09  | 0.00    | 0.00    |      | 0.00    | 0.00    | 0.00    | 0.05  | 0.00    |      |      | 0.01  | 0.00    | 0.00    | 0.00    |
| <b>J_beauty</b>           | 0.00    |      | 0.00    | 0.00  | 0.00    |      | 0.00  | 0.00    | 0.00    |      | 0.00    | 0.00    | 0.00    | 0.01  | 0.00    |      |      | 0.00  | 0.00    | 0.00    | 0.00    |
| <b>Dominance</b>          | 0.29    |      |         | 1.00  | -1.00   |      | 1.00  |         |         |      |         |         |         | 0.74  | -1.00   |      |      | 1.00  |         |         |         |
| <b>best_df</b>            | 4.20    |      | 5.00    | 3.00  | 5.00    |      | 3.00  | 5.00    | 5.00    |      | 5.00    | 4.00    | 3.00    | 3.00  | 5.00    |      |      | 5.00  | 3.00    | 4.00    | 5.00    |
| <b>p_value</b>            | 0.01    |      | 0.00    | 0.01  | 0.00    |      | 0.04  | 0.03    | 0.00    |      | 0.00    | 0.00    | 0.00    | 0.00  | 0.00    |      |      | 0.00  | 0.00    | 0.00    | 0.00    |
| <b>lr_stat</b>            | 36.31   |      | 42.73   | 18.52 | 73.99   |      | 14.80 | 18.29   | 36.27   |      | 31.76   | 31.90   | 36.31   | 34.88 | 43.11   |      |      | 54.27 | 32.75   | 27.82   | 47.22   |
| <b>linear_aic</b>         | 24.45   |      | 28.56   | 21.25 | 34.77   |      | 16.65 | 29.39   | 22.60   |      | 16.87   | 20.69   | 12.11   | 39.88 | 27.91   |      |      | 26.32 | 40.54   | 24.79   | 4.38    |
| <b>spline_aic</b>         | 4.54    |      | 3.83    | 16.73 | -21.23  |      | 15.84 | 29.10   | 4.33    |      | 3.11    | 4.80    | -10.21  | 19.01 | 2.81    |      |      | -9.95 | 21.78   | 12.97   | -24.84  |
| <b>min_age</b>            | 78.02   |      | 88.05   | 65.31 | 86.17   |      | 54.03 | 89.37   | 88.62   |      |         |         |         | 81.29 | 86.92   |      |      | 54.78 |         |         | 85.61   |
| <b>min_value</b>          | 5.36    |      | 4.94    | 5.24  | 5.23    |      | 6.05  | 4.40    | 5.82    |      |         |         |         | 4.86  | 5.32    |      |      | 5.93  |         |         | 5.76    |
| <b>amplitude</b>          | 2.21    |      | 2.15    | 1.39  | 2.77    |      | 1.47  | 2.80    | 1.47    |      | 2.17    | 2.21    | 1.19    | 3.09  | 1.93    |      |      | 1.86  | 4.32    | 2.73    | 1.56    |
| <b>delta_endpoints</b>    | -1.01   |      | -0.09   | -0.68 | 0.90    |      | -1.16 | -1.53   | -0.30   |      | -2.17   | -2.21   | -1.19   | 1.13  | 0.66    |      |      | -0.75 | -4.32   | -2.73   | -0.75   |
| <b>n_minima</b>           | 3.13    |      | 4.00    | 2.00  | 4.00    |      | 2.00  | 4.00    | 3.00    |      | 3.00    | 3.00    | 2.00    | 2.00  | 4.00    |      |      | 4.00  | 3.00    | 3.00    | 4.00    |
| <b>n_maxima</b>           | 2.73    |      | 3.00    | 2.00  | 3.00    |      | 1.00  | 3.00    | 2.00    |      | 3.00    | 3.00    | 2.00    | 2.00  | 3.00    |      |      | 4.00  | 3.00    | 3.00    | 4.00    |
| <b>turning_points</b>     | 5.87    |      | 7.00    | 4.00  | 7.00    |      | 3.00  | 7.00    | 5.00    |      | 6.00    | 6.00    | 4.00    | 4.00  | 7.00    |      |      | 8.00  | 6.00    | 6.00    | 8.00    |
| <b>r_trough</b>           | 0.88    |      | 0.95    | 0.64  | 0.92    |      | 0.49  | 0.96    | 0.95    |      | 1.00    | 1.00    | 1.00    | 0.86  | 0.93    |      |      | 0.50  | 1.00    | 1.00    | 0.91    |
| <b>interior_indicator</b> | False   |      | 0.00    | 1.00  | 0.00    |      | 1.00  | 0.00    | 0.00    |      | 0.00    | 0.00    | 0.00    | 1.00  | 0.00    |      |      | 1.00  | 0.00    | 0.00    | 0.00    |
| <b>trough_indicator</b>   | True    |      | 1.00    | 1.00  | 1.00    |      | 1.00  | 1.00    | 1.00    |      | 0.00    | 0.00    | 0.00    | 1.00  | 1.00    |      |      | 1.00  | 0.00    | 0.00    | 1.00    |
| <b>U_D_depth</b>          | 0.36    |      | 0.96    | 0.51  | 0.68    |      | 0.21  | 0.39    | 0.79    |      | 0.00    | 0.00    | 0.00    | 0.63  | 0.66    |      |      | 0.04  | 0.00    | 0.00    | 0.47    |
| <b>U_I_interiority</b>    | 0.18    |      | 0.00    | 0.64  | 0.00    |      | 0.98  | 0.00    | 0.00    |      | 0.00    | 0.00    | 0.00    | 0.11  | 0.00    |      |      | 0.99  | 0.00    | 0.00    | 0.00    |
| <b>U_M_monotonicity</b>   | 0.53    |      | 0.78    | 0.69  | 0.85    |      | 0.83  | 0.76    | 0.88    |      | 0.00    | 0.00    | 0.00    | 0.90  | 0.80    |      |      | 0.65  | 0.00    | 0.00    | 0.80    |
| <b>U_C_convexity</b>      | 0.57    |      | 0.64    | 1.00  | 0.63    |      | 0.94  | 0.69    | 0.66    |      | 0.00    | 0.00    | 0.00    | 1.00  | 0.64    |      |      | 0.65  | 0.00    | 0.83    | 0.91    |

|                  |         |         |      |         |      |         |         |         |         |         |      |         |      |         |         |         |
|------------------|---------|---------|------|---------|------|---------|---------|---------|---------|---------|------|---------|------|---------|---------|---------|
| U_S_symmetry     | 0.44    | 0.98    | 0.68 | 0.81    | 0.35 | 0.59    | 0.89    | 0.00    | 0.00    | 0.00    | 0.78 | 0.79    | 0.16 | 0.00    | 0.00    | 0.66    |
| J_R_rise         | 0.07    | 0.00    | 0.00 | 0.32    | 0.00 | 0.00    | 0.00    | 0.00    | 0.00    | 0.00    | 0.37 | 0.34    | 0.00 | 0.00    | 0.00    | 0.00    |
| J_M_monotonicity | 0.37    | 0.43    | 0.36 | 0.33    | 0.35 | 0.44    | 0.26    | 0.32    | 0.36    | 0.43    | 0.31 | 0.41    | 0.49 | 0.34    | 0.38    | 0.42    |
| J_C_rightconvex  | 0.47    | 0.57    | 0.17 | 0.58    | 0.67 | 0.53    | 0.53    | 0.55    | 0.12    | 0.00    | 0.99 | 0.57    | 0.35 | 0.44    | 0.38    | 0.67    |
| P_turning        | 0.06    | 0.01    | 0.12 | 0.01    | 0.25 | 0.01    | 0.06    | 0.03    | 0.03    | 0.12    | 0.12 | 0.01    | 0.01 | 0.03    | 0.03    | 0.01    |
| final_structure  | neither | neither | U    | neither | U    | neither | neither | neither | neither | neither | U    | neither | U    | neither | neither | neither |
| U_supported      | False   | 0.00    | 1.00 | 0.00    | 1.00 | 0.00    | 0.00    | 0.00    | 0.00    | 0.00    | 1.00 | 0.00    | 1.00 | 0.00    | 0.00    | 0.00    |
| J_supported      | False   | 0.00    | 0.00 | 0.00    | 0.00 | 0.00    | 0.00    | 0.00    | 0.00    | 0.00    | 0.00 | 0.00    | 0.00 | 0.00    | 0.00    | 0.00    |

Table S6e. Armenia Cantril U-shape ratings, 2006-2024

| KPI                | Mean    | 2005    | 2006    | 2007    | 2008    | 2009    | 2010    | 2011    | 2012    | 2013    | 2014    | 2015    | 2016  | 2017  | 2018    | 2019    | 2020  | 2021    | 2022   | 2023    | 2024  |
|--------------------|---------|---------|---------|---------|---------|---------|---------|---------|---------|---------|---------|---------|-------|-------|---------|---------|-------|---------|--------|---------|-------|
| shape_class        | neither | U       | neither | U       | U     |       | neither | neither | U     | neither | U      |         |       |
| U_beauty           | 0.02    | 0.00    | 0.00    | 0.00    | 0.00    | 0.00    | 0.00    | 0.00    | 0.00    | 0.03    | 0.00    | 0.00    | 0.00  | 0.00  | 0.00    | 0.00    | 0.00  | 0.01    | 0.00   | 0.00    | 0.33  |
| J_beauty           | 0.00    | 0.00    | 0.00    | 0.00    | 0.00    | 0.00    | 0.00    | 0.00    | 0.00    | 0.00    | 0.00    | 0.00    | 0.00  | 0.00  | 0.00    | 0.00    | 0.00  | 0.00    | 0.00   | 0.00    | 0.00  |
| Dominance          | 1.00    |         |         |         |         |         |         |         | 1.00    | 1.00    | 1.00    | 1.00    | 1.00  | 1.00  | 1.00    | 1.00    | 1.00  | 1.00    | 1.00   | 1.00    | 1.00  |
| best_df            | 4.44    | 5.00    | 5.00    | 4.00    | 4.00    | 4.00    | 4.00    | 3.00    | 4.00    | 3.00    | 5.00    | 4.00    | 5.00  | 5.00  | 5.00    | 5.00    | 5.00  | 5.00    | 5.00   | 5.00    | 5.00  |
| p_value            | 0.01    | 0.00    | 0.00    | 0.02    | 0.00    | 0.01    | 0.03    | 0.00    | 0.00    | 0.00    | 0.00    | 0.00    | 0.00  | 0.01  | 0.00    | 0.00    | 0.00  | 0.00    | 0.00   | 0.00    | 0.00  |
| lr_stat            | 33.31   | 40.50   | 43.94   | 18.90   | 43.22   | 19.98   | 15.11   | 28.01   | 29.62   | 25.65   | 23.42   | 20.99   | 44.49 | 27.53 | 57.03   | 57.55   | 37.08 | 27.53   | 57.03  | 57.55   | 37.08 |
| linear_aic         | 21.54   | 42.79   | 26.38   | 6.43    | 33.79   | 16.24   | 5.83    | 4.11    | 11.52   | 7.72    | 10.75   | 6.60    | 37.39 | 29.18 | 22.45   | 48.26   | 35.23 | 29.18   | 22.45  | 48.26   | 35.23 |
| spline_aic         | 5.10    | 20.29   | 0.44    | 3.53    | 6.56    | 12.27   | 4.71    | -7.90   | -4.10   | 0.07    | 3.33    | 3.62    | 10.90 | 19.65 | -16.59  | 8.71    | 16.15 | 19.65   | -16.59 | 8.71    | 16.15 |
| min_age            | 81.30   |         |         | 87.68   | 89.56   | 85.98   |         |         | 87.30   | 88.80   | 75.83   | 87.30   | 80.53 | 80.91 |         |         |       |         | 66.06  |         | 64.37 |
| min_value          | 3.19    |         |         | 2.66    | 2.85    | 2.15    |         |         | 3.13    | 3.03    | 3.54    | 2.57    | 3.25  | 2.67  |         |         |       |         | 4.67   |         | 4.59  |
| amplitude          | 2.93    | 4.19    | 2.75    | 2.77    | 2.94    | 3.78    |         |         | 1.98    | 2.26    | 2.00    | 2.60    | 2.30  | 2.38  | 3.05    | 2.99    | 1.77  | 6.95    | 2.99   | 1.77    | 6.95  |
| delta_endpoints    | -2.09   | -3.08   | -0.41   | -2.64   | -0.09   | -3.78   |         |         | -1.41   | -1.94   | -1.53   | -1.45   | -2.23 | -2.21 | -2.07   | -2.59   | -1.64 | -6.41   | -2.07  | -1.64   | -6.41 |
| n_minima           | 2.63    | 2.00    | 3.00    | 3.00    | 2.00    | 2.00    |         |         | 3.00    | 4.00    | 2.00    | 3.00    | 2.00  | 2.00  | 3.00    | 2.00    | 2.00  | 3.00    | 2.00   | 3.00    | 4.00  |
| n_maxima           | 2.63    | 2.00    | 2.00    | 2.00    | 1.00    | 2.00    |         |         | 2.00    | 4.00    | 2.00    | 3.00    | 3.00  | 2.00  | 4.00    | 3.00    | 2.00  | 4.00    | 2.00   | 4.00    | 4.00  |
| turning_points     | 5.25    | 4.00    | 5.00    | 5.00    | 3.00    | 4.00    |         |         | 5.00    | 8.00    | 4.00    | 6.00    | 5.00  | 4.00  | 7.00    | 5.00    | 4.00  | 7.00    | 5.00   | 4.00    | 8.00  |
| r_trough           | 0.90    | 1.00    | 0.94    | 0.97    | 0.92    | 1.00    |         |         | 0.94    | 0.96    | 0.78    | 0.94    | 0.85  | 0.85  | 1.00    | 1.00    | 0.65  | 1.00    | 0.65   | 1.00    | 0.63  |
| interior_indicator | False   | 0.00    | 0.00    | 0.00    | 0.00    | 0.00    |         |         | 0.00    | 0.00    | 1.00    | 0.00    | 1.00  | 1.00  | 0.00    | 0.00    | 1.00  | 0.00    | 1.00   | 0.00    | 1.00  |
| trough_indicator   | True    | 0.00    | 1.00    | 1.00    | 1.00    | 0.00    |         |         | 1.00    | 1.00    | 1.00    | 1.00    | 1.00  | 1.00  | 0.00    | 0.00    | 1.00  | 0.00    | 1.00   | 0.00    | 1.00  |
| U_D_depth          | 0.25    | 0.00    | 0.85    | 0.05    | 0.97    | 0.00    |         |         | 0.29    | 0.14    | 0.23    | 0.42    | 0.01  | 0.07  | 0.00    | 0.00    | 0.07  | 0.00    | 0.07   | 0.00    | 0.97  |
| U_I_interiority    | 0.11    | 0.00    | 0.00    | 0.00    | 0.00    | 0.00    |         |         | 0.00    | 0.00    | 0.29    | 0.00    | 0.13  | 0.12  | 0.00    | 0.00    | 0.61  | 0.00    | 0.61   | 0.00    | 0.67  |
| U_M_monotonicity   | 0.58    | 0.00    | 0.87    | 0.91    | 0.99    | 0.00    |         |         | 0.88    | 0.83    | 0.86    | 0.93    | 0.76  | 0.78  | 0.00    | 0.00    | 0.82  | 0.00    | 0.82   | 0.00    | 0.73  |
| U_C_convexity      | 0.51    | 0.00    | 0.67    | 0.87    | 0.71    | 0.00    |         |         | 0.78    | 0.72    | 0.97    | 0.69    | 0.65  | 0.67  | 0.00    | 0.00    | 0.71  | 0.00    | 0.71   | 0.00    | 0.65  |
| U_S_symmetry       | 0.31    | 0.00    | 0.92    | 0.09    | 0.98    | 0.00    |         |         | 0.45    | 0.24    | 0.38    | 0.60    | 0.02  | 0.13  | 0.00    | 0.00    | 0.14  | 0.00    | 0.14   | 0.00    | 1.00  |
| J_R_rise           | 0.00    | 0.00    | 0.00    | 0.00    | 0.00    | 0.00    |         |         | 0.00    | 0.00    | 0.00    | 0.00    | 0.00  | 0.00  | 0.00    | 0.00    | 0.00  | 0.00    | 0.00   | 0.00    | 0.00  |
| J_M_monotonicity   | 0.27    | 0.26    | 0.29    | 0.20    | 0.10    | 0.24    |         |         | 0.28    | 0.34    | 0.25    | 0.19    | 0.23  | 0.21  | 0.28    | 0.27    | 0.42  | 0.35    | 0.27   | 0.42    | 0.43  |
| J_C_rightconvex    | 0.50    | 0.54    | 0.56    | 0.46    | 0.51    | 0.33    |         |         | 0.51    | 0.52    | 0.52    | 0.45    | 0.51  | 0.53  | 0.50    | 0.46    | 0.49  | 0.42    | 0.46   | 0.49    | 0.73  |
| P_turning          | 0.08    | 0.12    | 0.06    | 0.06    | 0.25    | 0.12    |         |         | 0.06    | 0.01    | 0.12    | 0.03    | 0.06  | 0.12  | 0.01    | 0.06    | 0.12  | 0.01    | 0.06   | 0.12    | 0.01  |
| final_structure    | neither | neither | neither | neither | neither | neither |         |         | neither | neither | U       | neither | U     | U     | neither | neither | U     | neither | U      | neither | U     |
| U_supported        | False   | 0.00    | 0.00    | 0.00    | 0.00    | 0.00    |         |         | 0.00    | 0.00    | 1.00    | 0.00    | 1.00  | 1.00  | 0.00    | 0.00    | 1.00  | 0.00    | 1.00   | 0.00    | 1.00  |
| J_supported        | False   | 0.00    | 0.00    | 0.00    | 0.00    | 0.00    |         |         | 0.00    | 0.00    | 0.00    | 0.00    | 0.00  | 0.00  | 0.00    | 0.00    | 0.00  | 0.00    | 0.00   | 0.00    | 0.00  |

Table S6f. Australia Cantril U-shape ratings, 2006-2024

| KPI                | Mean  | 2005  | 2006 | 2007    | 2008 | 2009 | 2010    | 2011    | 2012    | 2013  | 2014  | 2015    | 2016  | 2017   | 2018  | 2019   | 2020   | 2021    | 2022  | 2023  | 2024    |
|--------------------|-------|-------|------|---------|------|------|---------|---------|---------|-------|-------|---------|-------|--------|-------|--------|--------|---------|-------|-------|---------|
| shape_class        | U     | U     |      | neither |      |      | neither | neither | neither | U     | U     | neither | U     | U      | U     | U      | J      | neither | U     | U     | neither |
| U_beauty           | 0.06  | 0.01  |      | 0.00    |      |      | 0.00    | 0.00    | 0.00    | 0.18  | 0.36  | 0.00    | 0.06  | 0.23   | 0.04  | 0.11   | 0.00   | 0.00    | 0.00  | 0.07  | 0.00    |
| J_beauty           | 0.01  | 0.00  |      | 0.00    |      |      | 0.01    | 0.00    | 0.00    | 0.00  | 0.00  | 0.00    | 0.00  | 0.03   | 0.00  | 0.05   | 0.01   | 0.00    | 0.02  | 0.00  | 0.00    |
| Dominance          | 0.15  | 0.81  |      |         |      |      | -1.00   |         | -1.00   | 1.00  | 1.00  |         | 0.93  | 0.75   | 1.00  | 0.41   | -1.00  | -1.00   | -0.95 | 1.00  |         |
| best_df            | 3.94  | 5.00  |      | 4.00    |      |      | 4.00    | 3.00    | 5.00    | 4.00  | 5.00  | 3.00    | 3.00  | 3.00   | 4.00  | 4.00   | 4.00   | 4.00    | 3.00  | 4.00  | 5.00    |
| p_value            | 0.01  | 0.00  |      | 0.00    |      |      | 0.00    | 0.00    | 0.00    | 0.03  | 0.00  | 0.00    | 0.01  | 0.00   | 0.00  | 0.00   | 0.00   | 0.00    | 0.11  | 0.00  | 0.00    |
| lr_stat            | 34.20 | 44.39 |      | 42.09   |      |      | 36.71   | 31.63   | 40.34   | 16.99 | 36.76 | 44.23   | 20.09 | 45.67  | 38.09 | 58.36  | 37.52  | 24.91   | 11.64 | 22.62 | 29.31   |
| linear_aic         | 12.64 | 38.16 |      | 21.88   |      |      | 21.15   | 6.23    | 19.89   | 0.74  | 11.35 | 21.71   | 8.02  | 19.90  | 14.80 | 14.52  | 10.09  | -1.14   | -5.65 | 5.36  | 7.81    |
| spline_aic         | -5.68 | 11.77 |      | -4.21   |      |      | 0.44    | -11.40  | -2.45   | -0.25 | -7.41 | -8.52   | 1.92  | -11.77 | -7.29 | -27.85 | -11.42 | -10.05  | -3.29 | -1.25 | -3.49   |
| min_age            | 46.97 | 78.47 |      |         |      |      | 85.42   |         | 86.92   | 48.02 | 49.89 |         | 31.66 | 45.20  | 30.16 | 49.33  | 22.83  | 19.26   | 29.22 | 58.35 | 22.83   |
| min_value          | 6.82  | 6.91  |      |         |      |      | 6.79    |         | 6.92    | 7.14  | 6.79  |         | 6.97  | 7.01   | 6.62  | 6.96   | 6.57   | 6.83    | 6.88  | 6.62  | 6.43    |
| amplitude          | 1.46  | 3.37  |      | 2.00    |      |      | 1.72    | 0.96    | 1.74    | 0.66  | 1.19  | 1.45    | 0.98  | 1.78   | 1.33  | 1.75   | 1.50   | 0.96    | 1.00  | 1.02  | 1.46    |
| delta_endpoints    | 0.27  | 2.59  |      | -1.63   |      |      | 0.90    | -0.71   | 1.01    | -0.25 | 0.00  | -1.22   | 0.22  | 0.85   | -0.18 | 1.31   | 0.45   | 0.74    | 0.75  | -0.10 | -0.14   |
| n_minima           | 3.06  | 4.00  |      | 3.00    |      |      | 3.00    | 3.00    | 4.00    | 4.00  | 4.00  | 2.00    | 3.00  | 2.00   | 2.00  | 2.00   | 3.00   | 4.00    | 2.00  | 3.00  | 4.00    |
| n_maxima           | 2.94  | 5.00  |      | 3.00    |      |      | 2.00    | 4.00    | 3.00    | 4.00  | 3.00  | 3.00    | 3.00  | 1.00   | 3.00  | 1.00   | 2.00   | 3.00    | 3.00  | 3.00  | 4.00    |
| turning_points     | 6.00  | 9.00  |      | 6.00    |      |      | 5.00    | 7.00    | 7.00    | 8.00  | 7.00  | 5.00    | 6.00  | 3.00   | 5.00  | 3.00   | 5.00   | 7.00    | 5.00  | 6.00  | 8.00    |
| r_trough           | 0.51  | 0.82  |      | 1.00    |      |      | 0.91    | 1.00    | 0.93    | 0.41  | 0.44  | 1.00    | 0.20  | 0.38   | 0.18  | 0.43   | 0.08   | 0.03    | 0.16  | 0.55  | 0.08    |
| interior_indicator | True  | 1.00  |      | 0.00    |      |      | 0.00    | 0.00    | 0.00    | 1.00  | 1.00  | 0.00    | 1.00  | 1.00   | 1.00  | 1.00   | 0.00   | 0.00    | 1.00  | 1.00  | 0.00    |
| trough_indicator   | True  | 1.00  |      | 0.00    |      |      | 1.00    | 0.00    | 1.00    | 1.00  | 1.00  | 0.00    | 1.00  | 1.00   | 1.00  | 1.00   | 1.00   | 1.00    | 1.00  | 1.00  | 1.00    |
| U_D_depth          | 0.33  | 0.15  |      | 0.00    |      |      | 0.48    | 0.00    | 0.42    | 0.55  | 0.76  | 0.00    | 0.49  | 0.52   | 0.48  | 0.25   | 0.70   | 0.12    | 0.03  | 0.21  | 0.48    |
| U_I_interiority    | 0.28  | 0.20  |      | 0.00    |      |      | 0.00    | 0.00    | 0.00    | 0.78  | 0.85  | 0.00    | 0.24  | 0.69   | 0.19  | 0.83   | 0.00   | 0.00    | 0.16  | 0.87  | 0.00    |
| U_M_monotonicity   | 0.62  | 0.71  |      | 0.00    |      |      | 0.75    | 0.00    | 0.75    | 0.67  | 0.68  | 0.00    | 0.74  | 0.84   | 0.70  | 0.90   | 0.83   | 0.78    | 0.72  | 0.64  | 0.79    |
| U_C_convexity      | 0.67  | 0.71  |      | 0.00    |      |      | 0.77    | 0.00    | 0.66    | 0.77  | 1.00  | 0.28    | 0.84  | 1.00   | 0.68  | 0.96   | 0.73   | 0.71    | 0.72  | 0.78  | 0.69    |
| U_S_symmetry       | 0.52  | 0.28  |      | 0.00    |      |      | 0.65    | 0.00    | 0.59    | 0.74  | 1.00  | 0.00    | 0.81  | 0.69   | 0.88  | 0.40   | 0.82   | 0.24    | 0.06  | 0.81  | 0.91    |
| J_R_rise           | 0.30  | 0.77  |      | 0.00    |      |      | 0.52    | 0.00    | 0.58    | 0.00  | 0.00  | 0.00    | 0.23  | 0.48   | 0.00  | 0.75   | 0.30   | 0.77    | 0.74  | 0.00  | 0.00    |
| J_M_monotonicity   | 0.52  | 0.50  |      | 0.56    |      |      | 0.48    | 0.52    | 0.48    | 0.44  | 0.49  | 0.50    | 0.51  | 0.44   | 0.58  | 0.46   | 0.64   | 0.59    | 0.68  | 0.46  | 0.58    |
| J_C_rightconvex    | 0.48  | 0.56  |      | 0.50    |      |      | 0.58    | 0.45    | 0.57    | 0.47  | 0.54  | 0.11    | 0.56  | 0.90   | 0.17  | 0.49   | 0.47   | 0.43    | 0.47  | 0.44  | 0.40    |
| P_turning          | 0.06  | 0.00  |      | 0.03    |      |      | 0.06    | 0.01    | 0.01    | 0.01  | 0.01  | 0.06    | 0.03  | 0.25   | 0.06  | 0.25   | 0.06   | 0.01    | 0.06  | 0.03  | 0.01    |
| final_structure    | U     | U     |      | neither |      |      | neither | neither | neither | U     | U     | neither | U     | U      | U     | U      | J      | neither | U     | U     | neither |
| U_supported        | True  | 1.00  |      | 0.00    |      |      | 0.00    | 0.00    | 0.00    | 1.00  | 1.00  | 0.00    | 1.00  | 1.00   | 1.00  | 1.00   | 0.00   | 0.00    | 1.00  | 1.00  | 0.00    |
| J_supported        | False | 0.00  |      | 0.00    |      |      | 0.00    | 0.00    | 0.00    | 0.00  | 0.00  | 0.00    | 0.00  | 0.00   | 0.00  | 0.00   | 1.00   | 0.00    | 0.00  | 0.00  | 0.00    |

Table S6g. Austria Cantril U-shape ratings, 2006-2024

| KPI         | Mean | 2005 | 2006    | 2007 | 2008 | 2009 | 2010 | 2011 | 2012    | 2013    | 2014 | 2015    | 2016 | 2017 | 2018 | 2019    | 2020 | 2021    | 2022 | 2023 | 2024 |
|-------------|------|------|---------|------|------|------|------|------|---------|---------|------|---------|------|------|------|---------|------|---------|------|------|------|
| shape_class | U    |      | neither |      | U    |      | U    | U    | neither | neither | U    | neither |      |      |      | neither | U    | neither |      | U    | U    |
| U_beauty    | 0.03 |      | 0.00    |      | 0.05 |      | 0.06 | 0.00 | 0.00    | 0.00    | 0.03 | 0.00    |      |      |      | 0.00    | 0.04 | 0.00    |      | 0.01 | 0.15 |
| J_beauty    | 0.00 |      | 0.00    |      | 0.00 |      | 0.00 | 0.00 | 0.00    | 0.00    | 0.00 | 0.00    |      |      |      | 0.00    | 0.00 | 0.00    |      | 0.00 | 0.00 |
| Dominance   | 0.87 |      |         |      | 0.92 |      | 0.95 | 1.00 |         |         | 0.92 |         |      |      |      |         | 0.91 |         |      | 0.44 | 1.00 |

|                           |       |         |       |        |       |         |         |       |         |  |         |       |         |       |       |
|---------------------------|-------|---------|-------|--------|-------|---------|---------|-------|---------|--|---------|-------|---------|-------|-------|
| <b>best_df</b>            | 4.15  | 3.00    | 4.00  | 5.00   | 3.00  | 3.00    | 4.00    | 5.00  | 3.00    |  | 5.00    | 4.00  | 5.00    | 5.00  | 5.00  |
| <b>p_value</b>            | 0.05  | 0.00    | 0.00  | 0.00   | 0.23  | 0.11    | 0.00    | 0.00  | 0.25    |  | 0.00    | 0.00  | 0.00    | 0.03  | 0.01  |
| <b>lr_stat</b>            | 33.18 | 34.28   | 56.21 | 51.94  | 9.39  | 11.65   | 36.36   | 48.96 | 9.08    |  | 72.54   | 27.56 | 34.30   | 18.31 | 20.73 |
| <b>linear_aic</b>         | 18.08 | 39.21   | 30.52 | 10.55  | 1.94  | 1.07    | 9.89    | 23.69 | 39.12   |  | 46.62   | 4.93  | 11.18   | 6.76  | 9.51  |
| <b>spline_aic</b>         | 1.21  | 18.92   | -9.69 | -23.39 | 6.56  | 3.42    | -10.47  | -7.26 | 44.04   |  | -7.92   | -6.63 | -5.12   | 6.45  | 6.78  |
| <b>min_age</b>            | 74.21 |         | 79.78 | 81.47  | 83.73 |         |         | 78.65 |         |  |         | 80.53 | 88.43   | 29.59 | 71.51 |
| <b>min_value</b>          | 6.53  |         | 6.36  | 6.62   | 6.65  |         |         | 6.35  |         |  |         | 6.89  | 6.41    | 6.28  | 6.67  |
| <b>amplitude</b>          | 2.01  | 3.57    | 2.64  | 1.38   | 1.29  | 1.67    | 2.11    | 2.11  | 2.21    |  | 4.87    | 1.10  | 1.21    | 1.14  | 0.83  |
| <b>delta_endpoints</b>    | -0.95 | -3.33   | 1.31  | 0.20   | -0.85 | -1.67   | -2.10   | 0.79  | -2.21   |  | -4.87   | 0.44  | -0.96   | 0.91  | 0.05  |
| <b>n_minima</b>           | 3.31  | 3.00    | 4.00  | 3.00   | 3.00  | 3.00    | 2.00    | 3.00  | 3.00    |  | 3.00    | 4.00  | 4.00    | 4.00  | 4.00  |
| <b>n_maxima</b>           | 3.08  | 3.00    | 3.00  | 2.00   | 3.00  | 3.00    | 3.00    | 4.00  | 3.00    |  | 3.00    | 3.00  | 3.00    | 4.00  | 3.00  |
| <b>turning_points</b>     | 6.38  | 6.00    | 7.00  | 5.00   | 6.00  | 6.00    | 5.00    | 7.00  | 6.00    |  | 6.00    | 7.00  | 7.00    | 8.00  | 7.00  |
| <b>r_trough</b>           | 0.85  | 1.00    | 0.84  | 0.86   | 0.89  | 1.00    | 1.00    | 0.82  | 1.00    |  | 1.00    | 0.85  | 0.95    | 0.17  | 0.73  |
| <b>interior_indicator</b> | True  | 0.00    | 1.00  | 1.00   | 1.00  | 0.00    | 0.00    | 1.00  | 0.00    |  | 0.00    | 1.00  | 0.00    | 1.00  | 1.00  |
| <b>trough_indicator</b>   | True  | 0.00    | 1.00  | 1.00   | 1.00  | 0.00    | 0.00    | 1.00  | 0.00    |  | 0.00    | 1.00  | 1.00    | 1.00  | 1.00  |
| <b>U_D_depth</b>          | 0.29  | 0.00    | 0.50  | 0.85   | 0.25  | 0.00    | 0.00    | 0.41  | 0.00    |  | 0.00    | 0.60  | 0.08    | 0.13  | 0.94  |
| <b>U_I_interiority</b>    | 0.09  | 0.00    | 0.16  | 0.10   | 0.03  | 0.00    | 0.00    | 0.19  | 0.00    |  | 0.00    | 0.13  | 0.00    | 0.17  | 0.43  |
| <b>U_M_monotonicity</b>   | 0.46  | 0.00    | 0.83  | 0.87   | 0.84  | 0.00    | 0.00    | 0.71  | 0.00    |  | 0.00    | 0.75  | 0.76    | 0.67  | 0.58  |
| <b>U_C_convexity</b>      | 0.54  | 0.00    | 0.90  | 0.85   | 1.00  | 0.00    | 0.25    | 0.71  | 0.00    |  | 0.00    | 0.85  | 1.00    | 0.84  | 0.67  |
| <b>U_S_symmetry</b>       | 0.37  | 0.00    | 0.67  | 0.92   | 0.43  | 0.00    | 0.00    | 0.69  | 0.00    |  | 0.00    | 0.75  | 0.17    | 0.24  | 0.97  |
| <b>J_R_rise</b>           | 0.17  | 0.00    | 0.50  | 0.15   | 0.00  | 0.00    | 0.00    | 0.37  | 0.00    |  | 0.00    | 0.40  | 0.00    | 0.80  | 0.06  |
| <b>J_M_monotonicity</b>   | 0.43  | 0.46    | 0.42  | 0.36   | 0.37  | 0.29    | 0.29    | 0.46  | 0.52    |  | 0.42    | 0.52  | 0.45    | 0.55  | 0.53  |
| <b>J_C_rightconvex</b>    | 0.60  | 0.44    | 0.97  | 0.68   | 0.98  | 0.49    | 0.55    | 0.56  | 0.38    |  | 0.37    | 0.67  | 0.68    | 0.53  | 0.56  |
| <b>P_turning</b>          | 0.03  | 0.03    | 0.01  | 0.06   | 0.03  | 0.03    | 0.06    | 0.01  | 0.03    |  | 0.03    | 0.01  | 0.01    | 0.01  | 0.01  |
| <b>final_structure</b>    | U     | neither | U     | U      | U     | neither | neither | U     | neither |  | neither | U     | neither | U     | U     |
| <b>U_supported</b>        | True  | 0.00    | 1.00  | 1.00   | 1.00  | 0.00    | 0.00    | 1.00  | 0.00    |  | 0.00    | 1.00  | 0.00    | 1.00  | 1.00  |
| <b>J_supported</b>        | False | 0.00    | 0.00  | 0.00   | 0.00  | 0.00    | 0.00    | 0.00  | 0.00    |  | 0.00    | 0.00  | 0.00    | 0.00  | 0.00  |

Table S6h. Azerbaijan Cantril U-shape ratings, 2006-2024

| KPI                    | Mean  | 2005 | 2006 | 2007 | 2008 | 2009  | 2010 | 2011 | 2012 | 2013 | 2014 | 2015 | 2016 | 2017 | 2018 | 2019 | 2020 | 2021 | 2022 | 2023 | 2024    |
|------------------------|-------|------|------|------|------|-------|------|------|------|------|------|------|------|------|------|------|------|------|------|------|---------|
| <b>shape_class</b>     | U     |      |      |      |      | U     |      |      |      |      |      |      |      |      |      |      |      |      |      |      | neither |
| <b>U_beauty</b>        | 0.00  |      |      |      |      | 0.00  |      |      |      |      |      |      |      |      |      |      |      |      |      |      | 0.00    |
| <b>J_beauty</b>        | 0.00  |      |      |      |      | 0.00  |      |      |      |      |      |      |      |      |      |      |      |      |      |      | 0.00    |
| <b>Dominance</b>       | 1.00  |      |      |      |      | 1.00  |      |      |      |      |      |      |      |      |      |      |      |      |      |      |         |
| <b>best_df</b>         | 5.00  |      |      |      |      | 5.00  |      |      |      |      |      |      |      |      |      |      |      |      |      |      | 5.00    |
| <b>p_value</b>         | 0.00  |      |      |      |      | 0.00  |      |      |      |      |      |      |      |      |      |      |      |      |      |      | 0.00    |
| <b>lr_stat</b>         | 38.86 |      |      |      |      | 25.98 |      |      |      |      |      |      |      |      |      |      |      |      |      |      | 51.74   |
| <b>linear_aic</b>      | 32.47 |      |      |      |      | 30.24 |      |      |      |      |      |      |      |      |      |      |      |      |      |      | 34.71   |
| <b>spline_aic</b>      | 11.61 |      |      |      |      | 22.26 |      |      |      |      |      |      |      |      |      |      |      |      |      |      | 0.97    |
| <b>min_age</b>         | 80.35 |      |      |      |      | 80.35 |      |      |      |      |      |      |      |      |      |      |      |      |      |      |         |
| <b>min_value</b>       | 2.82  |      |      |      |      | 2.82  |      |      |      |      |      |      |      |      |      |      |      |      |      |      |         |
| <b>amplitude</b>       | 3.42  |      |      |      |      | 2.34  |      |      |      |      |      |      |      |      |      |      |      |      |      |      | 4.50    |
| <b>delta_endpoints</b> | -2.97 |      |      |      |      | -1.56 |      |      |      |      |      |      |      |      |      |      |      |      |      |      | -4.38   |
| <b>n_minima</b>        | 2.50  |      |      |      |      | 3.00  |      |      |      |      |      |      |      |      |      |      |      |      |      |      | 2.00    |

|                    |       |      |         |
|--------------------|-------|------|---------|
| n_maxima           | 3.50  | 4.00 | 3.00    |
| turning_points     | 6.00  | 7.00 | 5.00    |
| r_trough           | 0.92  | 0.84 | 1.00    |
| interior_indicator | True  | 1.00 | 0.00    |
| trough_indicator   | True  | 1.00 | 0.00    |
| U_D_depth          | 0.04  | 0.08 | 0.00    |
| U_I_interiority    | 0.07  | 0.14 | 0.00    |
| U_M_monotonicity   | 0.33  | 0.67 | 0.00    |
| U_C_convexity      | 0.29  | 0.58 | 0.00    |
| U_S_symmetry       | 0.10  | 0.20 | 0.00    |
| J_R_rise           | 0.00  | 0.00 | 0.00    |
| J_M_monotonicity   | 0.30  | 0.41 | 0.20    |
| J_C_rightconvex    | 0.29  | 0.46 | 0.11    |
| P_turning          | 0.04  | 0.01 | 0.06    |
| final_structure    | U     | U    | neither |
| U_supported        | True  | 1.00 | 0.00    |
| J_supported        | False | 0.00 | 0.00    |

Table S6i. Bangladesh Cantril U-shape ratings, 2006-2024

| KPI                | Mean    | 2005 | 2006 | 2007    | 2008 | 2009  | 2010    | 2011    | 2012    | 2013 | 2014    | 2015 | 2016    | 2017    | 2018  | 2019    | 2020 | 2021 | 2022 | 2023 | 2024 |
|--------------------|---------|------|------|---------|------|-------|---------|---------|---------|------|---------|------|---------|---------|-------|---------|------|------|------|------|------|
| shape_class        | neither |      |      | neither |      | U     | neither | neither | neither |      | neither |      | neither | neither |       | neither |      |      |      |      |      |
| U_beauty           | 0.03    |      |      | 0.00    |      | 0.27  | 0.00    | 0.00    | 0.00    |      | 0.00    |      | 0.00    | 0.00    |       | 0.00    |      |      |      |      |      |
| J_beauty           | 0.00    |      |      | 0.00    |      | 0.03  | 0.00    | 0.00    | 0.00    |      | 0.00    |      | 0.00    | 0.00    |       | 0.00    |      |      |      |      |      |
| Dominance          | -0.09   |      |      |         |      | 0.82  | -1.00   |         |         |      |         |      |         |         |       |         |      |      |      |      |      |
| best_df            | 4.00    |      |      | 5.00    |      | 3.00  | 4.00    | 5.00    | 3.00    |      | 3.00    |      | 3.00    | 5.00    |       | 5.00    |      |      |      |      |      |
| p_value            | 0.14    |      |      | 0.00    |      | 0.04  | 0.00    | 0.00    | 0.00    |      | 0.94    |      | 0.26    | 0.00    |       | 0.00    |      |      |      |      |      |
| lr_stat            | 25.71   |      |      | 28.45   |      | 14.86 | 70.37   | 25.81   | 21.41   |      | 2.36    |      | 8.93    | 33.65   |       | 25.54   |      |      |      |      |      |
| linear_aic         | 24.23   |      |      | 25.01   |      | 30.37 | 22.71   | 34.85   | 6.63    |      | 16.69   |      | 16.81   | 40.34   |       | 24.68   |      |      |      |      |      |
| spline_aic         | 14.52   |      |      | 14.55   |      | 29.50 | -31.66  | 27.04   | -0.78   |      | 28.33   |      | 21.88   | 24.70   |       | 17.14   |      |      |      |      |      |
| min_age            | 84.61   |      |      |         |      | 67.38 | 86.92   | 90.50   | 86.55   |      |         |      | 87.30   |         | 88.99 |         |      |      |      |      |      |
| min_value          | 3.60    |      |      |         |      | 4.28  | 3.49    | 3.70    | 4.18    |      |         |      | 3.23    |         | 2.71  |         |      |      |      |      |      |
| amplitude          | 2.25    |      |      | 1.95    |      | 1.80  | 2.17    | 2.81    | 1.07    |      | 1.24    |      | 2.09    | 3.92    |       | 3.17    |      |      |      |      |      |
| delta_endpoints    | -1.05   |      |      | -1.60   |      | 0.61  | 0.38    | -1.68   | -0.22   |      | -1.18   |      | -1.44   | -2.47   |       | -1.88   |      |      |      |      |      |
| n_minima           | 3.00    |      |      | 3.00    |      | 2.00  | 3.00    | 5.00    | 3.00    |      | 2.00    |      | 3.00    | 3.00    |       | 3.00    |      |      |      |      |      |
| n_maxima           | 2.56    |      |      | 3.00    |      | 1.00  | 2.00    | 4.00    | 2.00    |      | 3.00    |      | 2.00    | 4.00    |       | 2.00    |      |      |      |      |      |
| turning_points     | 5.56    |      |      | 6.00    |      | 3.00  | 5.00    | 9.00    | 5.00    |      | 5.00    |      | 5.00    | 7.00    |       | 5.00    |      |      |      |      |      |
| r_trough           | 0.93    |      |      | 1.00    |      | 0.67  | 0.93    | 0.98    | 0.93    |      | 1.00    |      | 0.94    | 1.00    |       | 0.96    |      |      |      |      |      |
| interior_indicator | False   |      |      | 0.00    |      | 1.00  | 0.00    | 0.00    | 0.00    |      | 0.00    |      | 0.00    | 0.00    |       | 0.00    |      |      |      |      |      |
| trough_indicator   | True    |      |      | 0.00    |      | 1.00  | 1.00    | 1.00    | 1.00    |      | 0.00    |      | 1.00    | 0.00    |       | 1.00    |      |      |      |      |      |
| U_D_depth          | 0.34    |      |      | 0.00    |      | 0.66  | 0.82    | 0.10    | 0.80    |      | 0.00    |      | 0.31    | 0.00    |       | 0.41    |      |      |      |      |      |
| U_I_interiority    | 0.06    |      |      | 0.00    |      | 0.57  | 0.00    | 0.00    | 0.00    |      | 0.00    |      | 0.00    | 0.00    |       | 0.00    |      |      |      |      |      |
| U_M_monotonicity   | 0.55    |      |      | 0.00    |      | 0.86  | 0.82    | 0.76    | 0.82    |      | 0.00    |      | 0.85    | 0.00    |       | 0.83    |      |      |      |      |      |
| U_C_convexity      | 0.57    |      |      | 0.05    |      | 1.00  | 0.70    | 0.67    | 0.75    |      | 0.43    |      | 0.85    | 0.00    |       | 0.68    |      |      |      |      |      |
| U_S_symmetry       | 0.43    |      |      | 0.00    |      | 0.80  | 0.90    | 0.26    | 0.89    |      | 0.00    |      | 0.48    | 0.00    |       | 0.58    |      |      |      |      |      |

|                         |         |         |      |         |         |         |         |         |         |         |         |      |      |      |      |      |      |      |      |      |
|-------------------------|---------|---------|------|---------|---------|---------|---------|---------|---------|---------|---------|------|------|------|------|------|------|------|------|------|
| <b>J_R_rise</b>         | 0.06    | 0.00    | 0.34 | 0.18    | 0.00    | 0.00    | 0.00    | 0.00    | 0.00    | 0.00    | 0.00    | 0.00 | 0.00 | 0.00 | 0.00 | 0.00 | 0.00 | 0.00 | 0.00 | 0.00 |
| <b>J_M_monotonicity</b> | 0.40    | 0.53    | 0.50 | 0.38    | 0.43    | 0.37    | 0.29    | 0.32    | 0.45    | 0.34    |         |      |      |      |      |      |      |      |      |      |
| <b>J_C_rightconvex</b>  | 0.53    | 0.45    | 0.70 | 0.47    | 0.51    | 0.52    | 0.66    | 0.55    | 0.45    | 0.50    |         |      |      |      |      |      |      |      |      |      |
| <b>P_turning</b>        | 0.07    | 0.03    | 0.25 | 0.06    | 0.00    | 0.06    | 0.06    | 0.06    | 0.06    | 0.01    | 0.06    |      |      |      |      |      |      |      |      |      |
| <b>final_structure</b>  | neither | neither | U    | neither |      |      |      |      |      |      |      |      |      |
| <b>U_supported</b>      | False   | 0.00    | 1.00 | 0.00    | 0.00    | 0.00    | 0.00    | 0.00    | 0.00    | 0.00    | 0.00    |      |      |      |      |      |      |      |      |      |
| <b>J_supported</b>      | False   | 0.00    | 0.00 | 0.00    | 0.00    | 0.00    | 0.00    | 0.00    | 0.00    | 0.00    | 0.00    |      |      |      |      |      |      |      |      |      |

Table S6j. Belarus Cantril U-shape ratings, 2006-2024

| KPI                       | Mean    | 2005 | 2006 | 2007 | 2008 | 2009 | 2010    | 2011  | 2012    | 2013 | 2014  | 2015    | 2016    | 2017    | 2018 | 2019    | 2020 | 2021 | 2022 | 2023 | 2024 |
|---------------------------|---------|------|------|------|------|------|---------|-------|---------|------|-------|---------|---------|---------|------|---------|------|------|------|------|------|
| <b>shape_class</b>        | neither |      |      |      |      |      | neither | U     | neither |      | U     | neither | neither | neither |      | neither |      |      |      |      |      |
| <b>U_beauty</b>           | 0.01    |      |      |      |      |      | 0.00    | 0.06  | 0.00    |      | 0.01  | 0.00    | 0.00    | 0.00    |      | 0.00    |      |      |      |      |      |
| <b>J_beauty</b>           | 0.00    |      |      |      |      |      | 0.00    | 0.00  | 0.00    |      | 0.00  | 0.00    | 0.00    | 0.00    |      | 0.00    |      |      |      |      |      |
| <b>Dominance</b>          | 1.00    |      |      |      |      |      |         | 1.00  |         |      | 1.00  |         |         |         |      |         |      |      |      |      |      |
| <b>best_df</b>            | 4.38    |      |      |      |      |      | 5.00    | 3.00  | 5.00    |      | 3.00  | 5.00    | 4.00    | 5.00    |      | 5.00    |      |      |      |      |      |
| <b>p_value</b>            | 0.09    |      |      |      |      |      | 0.07    | 0.01  | 0.00    |      | 0.47  | 0.00    | 0.17    | 0.00    |      | 0.00    |      |      |      |      |      |
| <b>lr_stat</b>            | 33.05   |      |      |      |      |      | 15.81   | 19.94 | 54.43   |      | 6.66  | 40.01   | 11.66   | 59.73   |      | 56.18   |      |      |      |      |      |
| <b>linear_aic</b>         | 16.94   |      |      |      |      |      | 27.47   | 16.85 | 11.04   |      | 11.11 | 20.23   | 3.36    | 20.26   |      | 25.22   |      |      |      |      |      |
| <b>spline_aic</b>         | 0.64    |      |      |      |      |      | 29.67   | 10.91 | -25.38  |      | 18.46 | -1.78   | 7.70    | -21.47  |      | -12.97  |      |      |      |      |      |
| <b>min_age</b>            | 77.53   |      |      |      |      |      |         | 78.84 |         |      | 76.21 |         |         |         |      |         |      |      |      |      |      |
| <b>min_value</b>          | 4.47    |      |      |      |      |      |         | 4.09  |         |      | 4.85  |         |         |         |      |         |      |      |      |      |      |
| <b>amplitude</b>          | 2.98    |      |      |      |      |      | 2.51    | 1.82  | 4.13    |      | 1.49  | 3.24    | 2.50    | 3.37    |      | 4.79    |      |      |      |      |      |
| <b>delta_endpoints</b>    | -2.58   |      |      |      |      |      | -2.51   | -0.72 | -3.30   |      | -1.13 | -2.99   | -2.33   | -3.19   |      | -4.46   |      |      |      |      |      |
| <b>n_minima</b>           | 3.00    |      |      |      |      |      | 4.00    | 3.00  | 3.00    |      | 2.00  | 3.00    | 4.00    | 3.00    |      | 2.00    |      |      |      |      |      |
| <b>n_maxima</b>           | 3.38    |      |      |      |      |      | 4.00    | 2.00  | 4.00    |      | 3.00  | 3.00    | 4.00    | 4.00    |      | 3.00    |      |      |      |      |      |
| <b>turning_points</b>     | 6.38    |      |      |      |      |      | 8.00    | 5.00  | 7.00    |      | 5.00  | 6.00    | 8.00    | 7.00    |      | 5.00    |      |      |      |      |      |
| <b>r_trough</b>           | 0.95    |      |      |      |      |      | 1.00    | 0.82  | 1.00    |      | 0.79  | 1.00    | 1.00    | 1.00    |      | 1.00    |      |      |      |      |      |
| <b>interior_indicator</b> | False   |      |      |      |      |      | 0.00    | 1.00  | 0.00    |      | 1.00  | 0.00    | 0.00    | 0.00    |      | 0.00    |      |      |      |      |      |
| <b>trough_indicator</b>   | False   |      |      |      |      |      | 0.00    | 1.00  | 0.00    |      | 1.00  | 0.00    | 0.00    | 0.00    |      | 0.00    |      |      |      |      |      |
| <b>U_D_depth</b>          | 0.08    |      |      |      |      |      | 0.00    | 0.52  | 0.00    |      | 0.09  | 0.00    | 0.00    | 0.00    |      | 0.00    |      |      |      |      |      |
| <b>U_I_interiority</b>    | 0.06    |      |      |      |      |      | 0.00    | 0.19  | 0.00    |      | 0.28  | 0.00    | 0.00    | 0.00    |      | 0.00    |      |      |      |      |      |
| <b>U_M_monotonicity</b>   | 0.19    |      |      |      |      |      | 0.00    | 0.79  | 0.00    |      | 0.76  | 0.00    | 0.00    | 0.00    |      | 0.00    |      |      |      |      |      |
| <b>U_C_convexity</b>      | 0.24    |      |      |      |      |      | 0.00    | 0.95  | 0.00    |      | 0.92  | 0.00    | 0.03    | 0.00    |      | 0.00    |      |      |      |      |      |
| <b>U_S_symmetry</b>       | 0.11    |      |      |      |      |      | 0.00    | 0.72  | 0.00    |      | 0.19  | 0.00    | 0.00    | 0.00    |      | 0.00    |      |      |      |      |      |
| <b>J_R_rise</b>           | 0.00    |      |      |      |      |      | 0.00    | 0.00  | 0.00    |      | 0.00  | 0.00    | 0.00    | 0.00    |      | 0.00    |      |      |      |      |      |
| <b>J_M_monotonicity</b>   | 0.31    |      |      |      |      |      | 0.45    | 0.49  | 0.17    |      | 0.30  | 0.32    | 0.30    | 0.28    |      | 0.19    |      |      |      |      |      |
| <b>J_C_rightconvex</b>    | 0.49    |      |      |      |      |      | 0.45    | 0.65  | 0.31    |      | 0.49  | 0.44    | 0.53    | 0.52    |      | 0.54    |      |      |      |      |      |
| <b>P_turning</b>          | 0.03    |      |      |      |      |      | 0.01    | 0.06  | 0.01    |      | 0.06  | 0.03    | 0.01    | 0.01    |      | 0.06    |      |      |      |      |      |
| <b>final_structure</b>    | neither |      |      |      |      |      | neither | U     | neither |      | U     | neither | neither | neither |      | neither |      |      |      |      |      |
| <b>U_supported</b>        | False   |      |      |      |      |      | 0.00    | 1.00  | 0.00    |      | 1.00  | 0.00    | 0.00    | 0.00    |      | 0.00    |      |      |      |      |      |
| <b>J_supported</b>        | False   |      |      |      |      |      | 0.00    | 0.00  | 0.00    |      | 0.00  | 0.00    | 0.00    | 0.00    |      | 0.00    |      |      |      |      |      |

Table S6k. Belgium Cantril U-shape ratings, 2006-2024

| KPI                | Mean    | 2005 | 2006 | 2007 | 2008  | 2009 | 2010    | 2011  | 2012   | 2013    | 2014    | 2015 | 2016 | 2017 | 2018    | 2019    | 2020  | 2021    | 2022    | 2023    | 2024   |
|--------------------|---------|------|------|------|-------|------|---------|-------|--------|---------|---------|------|------|------|---------|---------|-------|---------|---------|---------|--------|
| shape_class        | neither |      |      |      | U     |      | neither | U     | U      | neither | neither |      |      |      | neither | neither | U     | neither | neither | neither | U      |
| U_beauty           | 0.02    |      |      |      | 0.08  |      | 0.00    | 0.09  | 0.04   | 0.00    | 0.00    |      |      |      | 0.00    | 0.00    | 0.01  | 0.00    | 0.00    | 0.00    | 0.01   |
| J_beauty           | 0.00    |      |      |      | 0.00  |      | 0.00    | 0.00  | 0.00   | 0.00    | 0.00    |      |      |      | 0.00    | 0.00    | 0.00  | 0.00    | 0.00    | 0.00    | 0.00   |
| Dominance          | 0.65    |      |      |      | 1.00  |      |         | 0.98  | 0.91   | -1.00   |         |      |      |      |         |         | 1.00  |         |         |         | 1.00   |
| best_df            | 4.31    |      |      |      | 5.00  |      | 5.00    | 4.00  | 5.00   | 3.00    | 5.00    |      |      |      | 4.00    | 3.00    | 4.00  | 3.00    | 5.00    | 5.00    | 5.00   |
| p_value            | 0.00    |      |      |      | 0.00  |      | 0.00    | 0.00  | 0.00   | 0.00    | 0.00    |      |      |      | 0.00    | 0.02    | 0.01  | 0.01    | 0.00    | 0.00    | 0.00   |
| lr_stat            | 37.39   |      |      |      | 25.79 |      | 58.75   | 27.01 | 71.36  | 47.87   | 31.02   |      |      |      | 43.19   | 16.53   | 20.97 | 20.27   | 28.13   | 53.43   | 41.79  |
| linear_aic         | 12.66   |      |      |      | 3.99  |      | 53.10   | 2.20  | 33.54  | 37.96   | -12.57  |      |      |      | 12.75   | 7.27    | 7.74  | 13.74   | -1.22   | 5.17    | 0.92   |
| spline_aic         | -8.12   |      |      |      | -3.80 |      | 12.34   | -8.81 | -19.82 | 4.09    | -25.59  |      |      |      | -14.44  | 4.74    | 2.78  | 7.47    | -11.35  | -30.26  | -22.87 |
| min_age            | 83.45   |      |      |      | 81.10 |      |         | 79.59 | 80.91  | 85.05   |         |      |      |      |         | 91.62   | 81.29 |         | 87.49   |         | 80.53  |
| min_value          | 6.28    |      |      |      | 6.55  |      |         | 6.53  | 6.07   | 6.15    |         |      |      |      |         | 5.99    | 5.98  |         | 6.40    |         | 6.60   |
| amplitude          | 1.80    |      |      |      | 0.95  |      | 5.50    | 0.92  | 2.93   | 3.39    | 1.00    |      |      |      | 1.76    | 1.03    | 1.25  | 1.28    | 1.04    | 1.24    | 1.12   |
| delta_endpoints    | -0.64   |      |      |      | 0.00  |      | -5.50   | 0.08  | 1.25   | 2.16    | -1.00   |      |      |      | -1.76   | -0.86   | -0.64 | -0.95   | -0.32   | -0.76   | -0.07  |
| n_minima           | 2.92    |      |      |      | 3.00  |      | 2.00    | 3.00  | 4.00   | 3.00    | 2.00    |      |      |      | 3.00    | 2.00    | 3.00  | 1.00    | 5.00    | 4.00    | 3.00   |
| n_maxima           | 2.92    |      |      |      | 2.00  |      | 2.00    | 3.00  | 3.00   | 3.00    | 2.00    |      |      |      | 3.00    | 2.00    | 4.00  | 2.00    | 4.00    | 4.00    | 4.00   |
| turning_points     | 5.85    |      |      |      | 5.00  |      | 4.00    | 6.00  | 7.00   | 6.00    | 4.00    |      |      |      | 6.00    | 4.00    | 7.00  | 3.00    | 9.00    | 8.00    | 7.00   |
| r_trough           | 0.93    |      |      |      | 0.85  |      | 1.00    | 0.83  | 0.85   | 0.91    | 1.00    |      |      |      | 1.00    | 0.99    | 0.86  | 1.00    | 0.94    | 1.00    | 0.85   |
| interior_indicator | False   |      |      |      | 1.00  |      | 0.00    | 1.00  | 1.00   | 0.00    | 0.00    |      |      |      | 0.00    | 0.00    | 1.00  | 0.00    | 0.00    | 0.00    | 1.00   |
| trough_indicator   | True    |      |      |      | 1.00  |      | 0.00    | 1.00  | 1.00   | 1.00    | 0.00    |      |      |      | 0.00    | 1.00    | 1.00  | 0.00    | 1.00    | 0.00    | 1.00   |
| U_D_depth          | 0.29    |      |      |      | 1.00  |      | 0.00    | 0.78  | 0.58   | 0.36    | 0.00    |      |      |      | 0.00    | 0.00    | 0.20  | 0.00    | 0.69    | 0.00    | 0.21   |
| U_I_interiority    | 0.05    |      |      |      | 0.11  |      | 0.00    | 0.16  | 0.12   | 0.00    | 0.00    |      |      |      | 0.00    | 0.00    | 0.11  | 0.00    | 0.00    | 0.00    | 0.13   |
| U_M_monotonicity   | 0.46    |      |      |      | 0.89  |      | 0.00    | 0.82  | 0.80   | 0.78    | 0.00    |      |      |      | 0.00    | 0.71    | 0.63  | 0.00    | 0.77    | 0.00    | 0.58   |
| U_C_convexity      | 0.53    |      |      |      | 0.75  |      | 0.00    | 0.86  | 0.85   | 0.75    | 0.00    |      |      |      | 0.70    | 1.00    | 0.66  | 0.00    | 0.67    | 0.00    | 0.59   |
| U_S_symmetry       | 0.41    |      |      |      | 1.00  |      | 0.00    | 0.95  | 0.73   | 0.53    | 0.00    |      |      |      | 0.00    | 0.01    | 0.45  | 0.00    | 0.82    | 0.00    | 0.88   |
| J_R_rise           | 0.09    |      |      |      | 0.00  |      | 0.00    | 0.09  | 0.42   | 0.64    | 0.00    |      |      |      | 0.00    | 0.00    | 0.00  | 0.00    | 0.00    | 0.00    | 0.00   |
| J_M_monotonicity   | 0.43    |      |      |      | 0.33  |      | 0.36    | 0.44  | 0.45   | 0.45    | 0.27    |      |      |      | 0.45    | 0.50    | 0.50  | 0.45    | 0.44    | 0.47    | 0.56   |
| J_C_rightconvex    | 0.47    |      |      |      | 0.59  |      | 0.50    | 0.74  | 0.87   | 0.58    | 0.09    |      |      |      | 0.30    | 0.43    | 0.52  | 0.24    | 0.54    | 0.22    | 0.47   |
| P_turning          | 0.06    |      |      |      | 0.06  |      | 0.12    | 0.03  | 0.01   | 0.03    | 0.12    |      |      |      | 0.03    | 0.12    | 0.01  | 0.25    | 0.00    | 0.01    | 0.01   |
| final_structure    | neither |      |      |      | U     |      | neither | U     | U      | neither | neither |      |      |      | neither | neither | U     | neither | neither | neither | U      |
| U_supported        | False   |      |      |      | 1.00  |      | 0.00    | 1.00  | 1.00   | 0.00    | 0.00    |      |      |      | 0.00    | 0.00    | 1.00  | 0.00    | 0.00    | 0.00    | 1.00   |
| J_supported        | False   |      |      |      | 0.00  |      | 0.00    | 0.00  | 0.00   | 0.00    | 0.00    |      |      |      | 0.00    | 0.00    | 0.00  | 0.00    | 0.00    | 0.00    | 0.00   |

Table S6l. Belize Cantril U-shape ratings, 2006-2024

| KPI         | Mean    | 2005 | 2006 | 2007 | 2008 | 2009 | 2010 | 2011 | 2012 | 2013 | 2014 | 2015 | 2016 | 2017 | 2018 | 2019 | 2020 | 2021 | 2022 | 2023 | 2024    |
|-------------|---------|------|------|------|------|------|------|------|------|------|------|------|------|------|------|------|------|------|------|------|---------|
| shape_class | neither |      |      |      |      |      |      |      |      |      |      |      |      |      |      |      |      |      |      |      | neither |
| U_beauty    | 0.00    |      |      |      |      |      |      |      |      |      |      |      |      |      |      |      |      |      |      |      | 0.00    |
| J_beauty    | 0.00    |      |      |      |      |      |      |      |      |      |      |      |      |      |      |      |      |      |      |      | 0.00    |
| Dominance   |         |      |      |      |      |      |      |      |      |      |      |      |      |      |      |      |      |      |      |      |         |
| best_df     | 4.00    |      |      |      |      |      |      |      |      |      |      |      |      |      |      |      |      |      |      |      | 4.00    |
| p_value     | 0.00    |      |      |      |      |      |      |      |      |      |      |      |      |      |      |      |      |      |      |      | 0.00    |

|                           |         |         |
|---------------------------|---------|---------|
| <b>lr_stat</b>            | 43.85   | 43.85   |
| <b>linear_aic</b>         | 62.76   | 62.76   |
| <b>spline_aic</b>         | 34.90   | 34.90   |
| <b>min_age</b>            | 91.44   | 91.44   |
| <b>min_value</b>          | -0.01   | -0.01   |
| <b>amplitude</b>          | 8.08    | 8.08    |
| <b>delta_endpoints</b>    | -8.04   | -8.04   |
| <b>n_minima</b>           | 4.00    | 4.00    |
| <b>n_maxima</b>           | 3.00    | 3.00    |
| <b>turning_points</b>     | 7.00    | 7.00    |
| <b>r_trough</b>           | 0.99    | 0.99    |
| <b>interior_indicator</b> | False   | 0.00    |
| <b>trough_indicator</b>   | True    | 1.00    |
| <b>U_D_depth</b>          | 0.01    | 0.01    |
| <b>U_I_interiority</b>    | 0.00    | 0.00    |
| <b>U_M_monotonicity</b>   | 0.80    | 0.80    |
| <b>U_C_convexity</b>      | 0.81    | 0.81    |
| <b>U_S_symmetry</b>       | 0.01    | 0.01    |
| <b>J_R_rise</b>           | 0.00    | 0.00    |
| <b>J_M_monotonicity</b>   | 0.37    | 0.37    |
| <b>J_C_rightconvex</b>    | 0.39    | 0.39    |
| <b>P_turning</b>          | 0.01    | 0.01    |
| <b>final_structure</b>    | neither | neither |
| <b>U_supported</b>        | False   | 0.00    |
| <b>J_supported</b>        | False   | 0.00    |

Table S6m. Benin Cantril U-shape ratings, 2006-2024

| KPI                    | Mean    | 2005 | 2006 | 2007 | 2008    | 2009 | 2010 | 2011    | 2012 | 2013    | 2014 | 2015    | 2016  | 2017 | 2018 | 2019 | 2020 | 2021 | 2022 | 2023 | 2024 |  |
|------------------------|---------|------|------|------|---------|------|------|---------|------|---------|------|---------|-------|------|------|------|------|------|------|------|------|--|
| <b>shape_class</b>     | neither |      |      |      | neither |      |      | neither |      | neither |      | neither | U     |      |      |      |      |      |      |      |      |  |
| <b>U_beauty</b>        | 0.00    |      |      |      | 0.00    |      |      | 0.00    |      | 0.00    |      | 0.00    | 0.01  |      |      |      |      |      |      |      |      |  |
| <b>J_beauty</b>        | 0.00    |      |      |      | 0.00    |      |      | 0.00    |      | 0.00    |      | 0.00    | 0.01  |      |      |      |      |      |      |      |      |  |
| <b>Dominance</b>       | 0.04    |      |      |      |         |      |      |         |      |         |      |         | 0.04  |      |      |      |      |      |      |      |      |  |
| <b>best_df</b>         | 4.20    |      |      |      | 5.00    |      |      | 5.00    |      | 3.00    |      | 3.00    | 5.00  |      |      |      |      |      |      |      |      |  |
| <b>p_value</b>         | 0.02    |      |      |      | 0.00    |      |      | 0.00    |      | 0.02    |      | 0.06    | 0.00  |      |      |      |      |      |      |      |      |  |
| <b>lr_stat</b>         | 38.02   |      |      |      | 39.35   |      |      | 55.74   |      | 16.58   |      | 13.36   | 65.09 |      |      |      |      |      |      |      |      |  |
| <b>linear_aic</b>      | 30.52   |      |      |      | 25.96   |      |      | 42.16   |      | 5.58    |      | 28.29   | 50.63 |      |      |      |      |      |      |      |      |  |
| <b>spline_aic</b>      | 8.90    |      |      |      | 4.61    |      |      | 4.42    |      | 3.00    |      | 28.93   | 3.54  |      |      |      |      |      |      |      |      |  |
| <b>min_age</b>         | 86.17   |      |      |      |         |      |      | 90.68   |      | 86.55   |      |         | 81.29 |      |      |      |      |      |      |      |      |  |
| <b>min_value</b>       | 2.02    |      |      |      |         |      |      | 0.72    |      | 2.26    |      |         | 3.07  |      |      |      |      |      |      |      |      |  |
| <b>amplitude</b>       | 3.02    |      |      |      | 2.44    |      |      | 4.24    |      | 1.52    |      | 1.98    | 4.93  |      |      |      |      |      |      |      |      |  |
| <b>delta_endpoints</b> | -0.71   |      |      |      | -1.79   |      |      | -2.91   |      | -0.60   |      | -1.92   | 3.67  |      |      |      |      |      |      |      |      |  |
| <b>n_minima</b>        | 3.00    |      |      |      | 3.00    |      |      | 5.00    |      | 2.00    |      | 2.00    | 3.00  |      |      |      |      |      |      |      |      |  |
| <b>n_maxima</b>        | 2.80    |      |      |      | 3.00    |      |      | 4.00    |      | 2.00    |      | 3.00    | 2.00  |      |      |      |      |      |      |      |      |  |
| <b>turning_points</b>  | 5.80    |      |      |      | 6.00    |      |      | 9.00    |      | 4.00    |      | 5.00    | 5.00  |      |      |      |      |      |      |      |      |  |

|                           |         |         |         |         |         |      |
|---------------------------|---------|---------|---------|---------|---------|------|
| <b>r_trough</b>           | 0.95    | 1.00    | 0.98    | 0.93    | 1.00    | 0.86 |
| <b>interior_indicator</b> | False   | 0.00    | 0.00    | 0.00    | 0.00    | 1.00 |
| <b>trough_indicator</b>   | True    | 0.00    | 1.00    | 1.00    | 0.00    | 1.00 |
| <b>U_D_depth</b>          | 0.16    | 0.00    | 0.06    | 0.50    | 0.00    | 0.26 |
| <b>U_I_interiority</b>    | 0.02    | 0.00    | 0.00    | 0.00    | 0.00    | 0.11 |
| <b>U_M_monotonicity</b>   | 0.49    | 0.00    | 0.74    | 0.90    | 0.00    | 0.83 |
| <b>U_C_convexity</b>      | 0.49    | 0.00    | 0.70    | 0.84    | 0.00    | 0.91 |
| <b>U_S_symmetry</b>       | 0.26    | 0.00    | 0.16    | 0.71    | 0.00    | 0.41 |
| <b>J_R_rise</b>           | 0.15    | 0.00    | 0.00    | 0.00    | 0.00    | 0.74 |
| <b>J_M_monotonicity</b>   | 0.39    | 0.46    | 0.46    | 0.25    | 0.36    | 0.42 |
| <b>J_C_rightconvex</b>    | 0.50    | 0.56    | 0.48    | 0.58    | 0.00    | 0.90 |
| <b>P_turning</b>          | 0.06    | 0.03    | 0.00    | 0.12    | 0.06    | 0.06 |
| <b>final_structure</b>    | neither | neither | neither | neither | neither | U    |
| <b>U_supported</b>        | False   | 0.00    | 0.00    | 0.00    | 0.00    | 1.00 |
| <b>J_supported</b>        | False   | 0.00    | 0.00    | 0.00    | 0.00    | 0.00 |

Table S6n. Bhutan Cantril U-shape ratings, 2006-2024

| KPI                | Mean    | 2005 | 2006 | 2007 | 2008 | 2009 | 2010 | 2011 | 2012 | 2013 | 2014 | 2015    | 2016 | 2017 | 2018 | 2019 | 2020 | 2021 | 2022 | 2023 | 2024 |  |
|--------------------|---------|------|------|------|------|------|------|------|------|------|------|---------|------|------|------|------|------|------|------|------|------|--|
| shape_class        | neither |      |      |      |      |      |      |      |      |      |      | neither |      |      |      |      |      |      |      |      |      |  |
| U_beauty           | 0.00    |      |      |      |      |      |      |      |      |      |      | 0.00    |      |      |      |      |      |      |      |      |      |  |
| J_beauty           | 0.00    |      |      |      |      |      |      |      |      |      |      | 0.00    |      |      |      |      |      |      |      |      |      |  |
| Dominance          |         |      |      |      |      |      |      |      |      |      |      |         |      |      |      |      |      |      |      |      |      |  |
| best_df            | 3.00    |      |      |      |      |      |      |      |      |      |      | 3.00    |      |      |      |      |      |      |      |      |      |  |
| p_value            | 0.00    |      |      |      |      |      |      |      |      |      |      | 0.00    |      |      |      |      |      |      |      |      |      |  |
| lr_stat            | 21.29   |      |      |      |      |      |      |      |      |      |      | 21.29   |      |      |      |      |      |      |      |      |      |  |
| linear_aic         | 18.14   |      |      |      |      |      |      |      |      |      |      | 18.14   |      |      |      |      |      |      |      |      |      |  |
| spline_aic         | 10.85   |      |      |      |      |      |      |      |      |      |      | 10.85   |      |      |      |      |      |      |      |      |      |  |
| min_age            |         |      |      |      |      |      |      |      |      |      |      |         |      |      |      |      |      |      |      |      |      |  |
| min_value          |         |      |      |      |      |      |      |      |      |      |      |         |      |      |      |      |      |      |      |      |      |  |
| amplitude          | 1.79    |      |      |      |      |      |      |      |      |      |      | 1.79    |      |      |      |      |      |      |      |      |      |  |
| delta_endpoints    | -1.52   |      |      |      |      |      |      |      |      |      |      | -1.52   |      |      |      |      |      |      |      |      |      |  |
| n_minima           | 2.00    |      |      |      |      |      |      |      |      |      |      | 2.00    |      |      |      |      |      |      |      |      |      |  |
| n_maxima           | 3.00    |      |      |      |      |      |      |      |      |      |      | 3.00    |      |      |      |      |      |      |      |      |      |  |
| turning_points     | 5.00    |      |      |      |      |      |      |      |      |      |      | 5.00    |      |      |      |      |      |      |      |      |      |  |
| r_trough           | 1.00    |      |      |      |      |      |      |      |      |      |      | 1.00    |      |      |      |      |      |      |      |      |      |  |
| interior_indicator | False   |      |      |      |      |      |      |      |      |      |      | 0.00    |      |      |      |      |      |      |      |      |      |  |
| trough_indicator   | False   |      |      |      |      |      |      |      |      |      |      | 0.00    |      |      |      |      |      |      |      |      |      |  |
| U_D_depth          | 0.00    |      |      |      |      |      |      |      |      |      |      | 0.00    |      |      |      |      |      |      |      |      |      |  |
| U_I_interiority    | 0.00    |      |      |      |      |      |      |      |      |      |      | 0.00    |      |      |      |      |      |      |      |      |      |  |
| U_M_monotonicity   | 0.00    |      |      |      |      |      |      |      |      |      |      | 0.00    |      |      |      |      |      |      |      |      |      |  |
| U_C_convexity      | 0.00    |      |      |      |      |      |      |      |      |      |      | 0.00    |      |      |      |      |      |      |      |      |      |  |
| U_S_symmetry       | 0.00    |      |      |      |      |      |      |      |      |      |      | 0.00    |      |      |      |      |      |      |      |      |      |  |
| J_R_rise           | 0.00    |      |      |      |      |      |      |      |      |      |      | 0.00    |      |      |      |      |      |      |      |      |      |  |
| J_M_monotonicity   | 0.42    |      |      |      |      |      |      |      |      |      |      | 0.42    |      |      |      |      |      |      |      |      |      |  |

|                        |         |         |
|------------------------|---------|---------|
| <b>J_C_rightconvex</b> | 0.02    | 0.02    |
| <b>P_turning</b>       | 0.06    | 0.06    |
| <b>final_structure</b> | neither | neither |
| <b>U_supported</b>     | False   | 0.00    |
| <b>J_supported</b>     | False   | 0.00    |

Table S6o. Bolivia Cantril U-shape ratings, 2006-2024

| KPI                       | Mean    | 2005 | 2006 | 2007 | 2008  | 2009 | 2010 | 2011 | 2012    | 2013 | 2014    | 2015    | 2016 | 2017  | 2018 | 2019 | 2020 | 2021 | 2022 | 2023 | 2024 | All |
|---------------------------|---------|------|------|------|-------|------|------|------|---------|------|---------|---------|------|-------|------|------|------|------|------|------|------|-----|
| <b>shape_class</b>        | neither |      |      |      | U     |      |      |      | neither |      | neither | neither |      | U     |      |      |      |      |      |      |      |     |
| <b>U_beauty</b>           | 0.01    |      |      |      | 0.03  |      |      |      | 0.00    |      | 0.00    | 0.00    |      | 0.03  |      |      |      |      |      |      |      |     |
| <b>J_beauty</b>           | 0.00    |      |      |      | 0.00  |      |      |      | 0.00    |      | 0.00    | 0.00    |      | 0.00  |      |      |      |      |      |      |      |     |
| <b>Dominance</b>          | 1.00    |      |      |      | 1.00  |      |      |      |         |      |         |         |      | 1.00  |      |      |      |      |      |      |      |     |
| <b>best_df</b>            | 5.00    |      |      |      | 5.00  |      |      |      | 5.00    |      | 5.00    | 5.00    |      | 5.00  |      |      |      |      |      |      |      |     |
| <b>p_value</b>            | 0.02    |      |      |      | 0.00  |      |      |      | 0.09    |      | 0.00    | 0.00    |      | 0.00  |      |      |      |      |      |      |      |     |
| <b>lr_stat</b>            | 34.57   |      |      |      | 24.15 |      |      |      | 14.92   |      | 53.75   | 30.79   |      | 49.21 |      |      |      |      |      |      |      |     |
| <b>linear_aic</b>         | 28.31   |      |      |      | 18.07 |      |      |      | 26.97   |      | 45.06   | 20.15   |      | 31.33 |      |      |      |      |      |      |      |     |
| <b>spline_aic</b>         | 11.75   |      |      |      | 11.91 |      |      |      | 30.05   |      | 9.31    | 7.35    |      | 0.12  |      |      |      |      |      |      |      |     |
| <b>min_age</b>            | 85.47   |      |      |      | 82.04 |      |      |      | 88.80   |      | 90.12   |         |      | 80.91 |      |      |      |      |      |      |      |     |
| <b>min_value</b>          | 3.36    |      |      |      | 3.78  |      |      |      | 3.94    |      | 1.35    |         |      | 4.35  |      |      |      |      |      |      |      |     |
| <b>amplitude</b>          | 2.99    |      |      |      | 2.17  |      |      |      | 2.70    |      | 5.21    | 1.91    |      | 2.96  |      |      |      |      |      |      |      |     |
| <b>delta_endpoints</b>    | -1.88   |      |      |      | -0.95 |      |      |      | -1.64   |      | -4.57   | -1.91   |      | -0.31 |      |      |      |      |      |      |      |     |
| <b>n_minima</b>           | 3.00    |      |      |      | 3.00  |      |      |      | 3.00    |      | 3.00    | 3.00    |      | 3.00  |      |      |      |      |      |      |      |     |
| <b>n_maxima</b>           | 2.80    |      |      |      | 2.00  |      |      |      | 3.00    |      | 2.00    | 3.00    |      | 4.00  |      |      |      |      |      |      |      |     |
| <b>turning_points</b>     | 5.80    |      |      |      | 5.00  |      |      |      | 6.00    |      | 5.00    | 6.00    |      | 7.00  |      |      |      |      |      |      |      |     |
| <b>r_trough</b>           | 0.93    |      |      |      | 0.87  |      |      |      | 0.96    |      | 0.97    | 1.00    |      | 0.85  |      |      |      |      |      |      |      |     |
| <b>interior_indicator</b> | False   |      |      |      | 1.00  |      |      |      | 0.00    |      | 0.00    | 0.00    |      | 1.00  |      |      |      |      |      |      |      |     |
| <b>trough_indicator</b>   | True    |      |      |      | 1.00  |      |      |      | 1.00    |      | 1.00    | 0.00    |      | 1.00  |      |      |      |      |      |      |      |     |
| <b>U_D_depth</b>          | 0.33    |      |      |      | 0.56  |      |      |      | 0.39    |      | 0.12    | 0.00    |      | 0.56  |      |      |      |      |      |      |      |     |
| <b>U_I_interiority</b>    | 0.04    |      |      |      | 0.08  |      |      |      | 0.00    |      | 0.00    | 0.00    |      | 0.12  |      |      |      |      |      |      |      |     |
| <b>U_M_monotonicity</b>   | 0.65    |      |      |      | 0.84  |      |      |      | 0.85    |      | 0.86    | 0.00    |      | 0.71  |      |      |      |      |      |      |      |     |
| <b>U_C_convexity</b>      | 0.65    |      |      |      | 0.77  |      |      |      | 0.68    |      | 0.68    | 0.53    |      | 0.59  |      |      |      |      |      |      |      |     |
| <b>U_S_symmetry</b>       | 0.48    |      |      |      | 0.72  |      |      |      | 0.56    |      | 0.22    | 0.00    |      | 0.91  |      |      |      |      |      |      |      |     |
| <b>J_R_rise</b>           | 0.00    |      |      |      | 0.00  |      |      |      | 0.00    |      | 0.00    | 0.00    |      | 0.00  |      |      |      |      |      |      |      |     |
| <b>J_M_monotonicity</b>   | 0.34    |      |      |      | 0.38  |      |      |      | 0.31    |      | 0.28    | 0.36    |      | 0.38  |      |      |      |      |      |      |      |     |
| <b>J_C_rightconvex</b>    | 0.51    |      |      |      | 0.61  |      |      |      | 0.51    |      | 0.50    | 0.45    |      | 0.47  |      |      |      |      |      |      |      |     |
| <b>P_turning</b>          | 0.04    |      |      |      | 0.06  |      |      |      | 0.03    |      | 0.06    | 0.03    |      | 0.01  |      |      |      |      |      |      |      |     |
| <b>final_structure</b>    | neither |      |      |      | U     |      |      |      | neither |      | neither | neither |      | U     |      |      |      |      |      |      |      |     |
| <b>U_supported</b>        | False   |      |      |      | 1.00  |      |      |      | 0.00    |      | 0.00    | 0.00    |      | 1.00  |      |      |      |      |      |      |      |     |
| <b>J_supported</b>        | False   |      |      |      | 0.00  |      |      |      | 0.00    |      | 0.00    | 0.00    |      | 0.00  |      |      |      |      |      |      |      |     |

Table S6p. Bosnia Herzegovina Cantril U-shape ratings, 2006-2024

| KPI                | Mean    | 2005 | 2006 | 2007  | 2008 | 2009 | 2010    | 2011 | 2012 | 2013 | 2014   | 2015 | 2016 | 2017    | 2018    | 2019  | 2020    | 2021  | 2022 | 2023    | 2024    |
|--------------------|---------|------|------|-------|------|------|---------|------|------|------|--------|------|------|---------|---------|-------|---------|-------|------|---------|---------|
| shape_class        | neither |      | U    |       |      |      | neither |      |      |      | U      |      |      | neither | neither | U     | neither | U     |      | neither | neither |
| U_beauty           | 0.03    |      |      | 0.01  |      |      | 0.00    |      |      |      | 0.04   |      |      | 0.00    | 0.00    | 0.07  | 0.00    | 0.23  |      | 0.00    | 0.00    |
| J_beauty           | 0.00    |      |      | 0.01  |      |      | 0.00    |      |      |      | 0.00   |      |      | 0.00    | 0.00    | 0.00  | 0.00    | 0.00  |      | 0.00    | 0.00    |
| Dominance          | 0.68    |      |      | -0.30 |      |      |         |      |      |      | 1.00   |      |      |         |         | 1.00  |         |       |      |         |         |
| best_df            | 4.30    |      |      | 3.00  |      |      | 5.00    |      |      |      | 5.00   |      |      | 5.00    | 5.00    | 4.00  | 4.00    | 3.00  |      | 5.00    | 4.00    |
| p_value            | 0.01    |      |      | 0.00  |      |      | 0.00    |      |      |      | 0.00   |      |      | 0.00    | 0.04    | 0.00  | 0.00    | 0.00  |      | 0.01    | 0.00    |
| lr_stat            | 40.94   |      |      | 70.07 |      |      | 51.48   |      |      |      | 63.36  |      |      | 55.75   | 17.71   | 31.04 | 47.09   | 27.75 |      | 22.53   | 22.65   |
| linear_aic         | 27.38   |      |      | 55.06 |      |      | 21.24   |      |      |      | 19.29  |      |      | 35.92   | 14.72   | 29.05 | 34.07   | 36.74 |      | -4.22   | 31.90   |
| spline_aic         | 3.03    |      |      | -1.01 |      |      | -12.24  |      |      |      | -26.07 |      |      | -1.83   | 15.01   | 14.01 | 2.98    | 22.99 |      | -8.75   | 25.24   |
| min_age            | 83.49   |      |      | 83.73 |      |      | 89.56   |      |      |      | 80.91  |      |      |         |         | 78.65 | 87.86   | 75.65 |      | 88.05   |         |
| min_value          | 4.11    |      |      | 3.72  |      |      | 3.38    |      |      |      | 3.94   |      |      |         |         | 4.43  | 3.91    | 4.95  |      | 4.45    |         |
| amplitude          | 3.09    |      |      | 5.27  |      |      | 2.50    |      |      |      | 2.26   |      |      | 4.11    | 2.79    | 3.09  | 2.95    | 2.02  |      | 2.63    | 3.30    |
| delta_endpoints    | -1.41   |      |      | 2.79  |      |      | -1.63   |      |      |      | -0.95  |      |      | -4.04   | -2.68   | -1.55 | -0.83   | 0.00  |      | -1.89   | -3.30   |
| n_minima           | 2.60    |      |      | 2.00  |      |      | 3.00    |      |      |      | 3.00   |      |      | 4.00    | 4.00    | 1.00  | 2.00    | 2.00  |      | 3.00    | 2.00    |
| n_maxima           | 2.60    |      |      | 1.00  |      |      | 3.00    |      |      |      | 3.00   |      |      | 5.00    | 5.00    | 1.00  | 2.00    | 1.00  |      | 3.00    | 2.00    |
| turning_points     | 5.20    |      |      | 3.00  |      |      | 6.00    |      |      |      | 6.00   |      |      | 9.00    | 9.00    | 2.00  | 4.00    | 3.00  |      | 6.00    | 4.00    |
| r_trough           | 0.92    |      |      | 0.89  |      |      | 0.97    |      |      |      | 0.85   |      |      | 1.00    | 1.00    | 0.82  | 0.94    | 0.78  |      | 0.95    | 1.00    |
| interior_indicator | False   |      |      | 1.00  |      |      | 0.00    |      |      |      | 1.00   |      |      | 0.00    | 0.00    | 1.00  | 0.00    | 1.00  |      | 0.00    | 0.00    |
| trough_indicator   | True    |      |      | 1.00  |      |      | 1.00    |      |      |      | 1.00   |      |      | 0.00    | 0.00    | 1.00  | 1.00    | 1.00  |      | 1.00    | 0.00    |
| U_D_depth          | 0.37    |      |      | 0.47  |      |      | 0.25    |      |      |      | 0.58   |      |      | 0.00    | 0.00    | 0.50  | 0.71    | 1.00  |      | 0.21    | 0.00    |
| U_I_interiority    | 0.06    |      |      | 0.03  |      |      | 0.00    |      |      |      | 0.12   |      |      | 0.00    | 0.00    | 0.19  | 0.00    | 0.30  |      | 0.00    | 0.00    |
| U_M_monotonicity   | 0.62    |      |      | 0.92  |      |      | 0.87    |      |      |      | 0.82   |      |      | 0.00    | 0.00    | 0.99  | 0.87    | 0.88  |      | 0.90    | 0.00    |
| U_C_convexity      | 0.52    |      |      | 0.71  |      |      | 0.66    |      |      |      | 0.65   |      |      | 0.00    | 0.10    | 0.81  | 0.73    | 0.91  |      | 0.67    | 0.00    |
| U_S_symmetry       | 0.47    |      |      | 0.64  |      |      | 0.43    |      |      |      | 0.74   |      |      | 0.00    | 0.00    | 0.67  | 0.83    | 1.00  |      | 0.37    | 0.00    |
| J_R_rise           | 0.05    |      |      | 0.53  |      |      | 0.00    |      |      |      | 0.00   |      |      | 0.00    | 0.00    | 0.00  | 0.00    | 0.00  |      | 0.00    | 0.00    |
| J_M_monotonicity   | 0.28    |      |      | 0.24  |      |      | 0.28    |      |      |      | 0.29   |      |      | 0.37    | 0.35    | 0.17  | 0.29    | 0.39  |      | 0.23    | 0.24    |
| J_C_rightconvex    | 0.53    |      |      | 0.61  |      |      | 0.51    |      |      |      | 0.51   |      |      | 0.46    | 0.41    | 0.64  | 0.45    | 0.61  |      | 0.60    | 0.50    |
| P_turning          | 0.13    |      |      | 0.25  |      |      | 0.03    |      |      |      | 0.03   |      |      | 0.00    | 0.00    | 0.50  | 0.12    | 0.25  |      | 0.03    | 0.12    |
| final_structure    | neither |      |      | U     |      |      | neither |      |      |      | U      |      |      | neither | neither | U     | neither | U     |      | neither | neither |
| U_supported        | False   |      |      | 1.00  |      |      | 0.00    |      |      |      | 1.00   |      |      | 0.00    | 0.00    | 1.00  | 0.00    | 1.00  |      | 0.00    | 0.00    |
| J_supported        | False   |      |      | 0.00  |      |      | 0.00    |      |      |      | 0.00   |      |      | 0.00    | 0.00    | 0.00  | 0.00    | 0.00  |      | 0.00    | 0.00    |

Table S6q. Botswana Cantril U-shape ratings, 2006-2024

| KPI         | Mean    | 2005 | 2006 | 2007 | 2008    | 2009 | 2010 | 2011    | 2012    | 2013 | 2014    | 2015    | 2016    | 2017    | 2018    | 2019 | 2020 | 2021 | 2022    | 2023 | 2024 |
|-------------|---------|------|------|------|---------|------|------|---------|---------|------|---------|---------|---------|---------|---------|------|------|------|---------|------|------|
| shape_class | neither |      | U    |      | neither |      | U    | neither | neither | U    | neither | neither | neither | neither | neither | U    |      |      | neither | U    | U    |
| U_beauty    | 0.02    |      | 0.05 |      | 0.00    |      | 0.00 | 0.00    | 0.00    | 0.01 | 0.00    | 0.00    | 0.00    | 0.00    | 0.00    | 0.08 |      |      | 0.00    | 0.06 | 0.02 |
| J_beauty    | 0.00    |      | 0.01 |      | 0.00    |      | 0.00 | 0.00    | 0.00    | 0.00 | 0.00    | 0.00    | 0.00    | 0.00    | 0.00    | 0.00 |      |      | 0.00    | 0.00 | 0.00 |
| Dominance   | 0.96    |      | 0.79 |      |         |      | 1.00 |         |         |      | 1.00    |         |         |         |         | 0.99 |      |      |         | 1.00 | 1.00 |
| best_df     | 4.27    |      | 3.00 |      | 5.00    |      | 5.00 | 5.00    | 3.00    | 3.00 | 4.00    | 3.00    | 5.00    | 5.00    | 3.00    | 5.00 |      |      | 5.00    | 5.00 | 5.00 |
| p_value     | 0.02    |      | 0.04 |      | 0.00    |      | 0.05 | 0.00    | 0.01    | 0.14 | 0.00    | 0.01    | 0.00    | 0.00    | 0.00    | 0.00 |      |      | 0.04    | 0.00 | 0.00 |

|                           |         |       |         |       |         |         |       |         |         |         |         |         |       |         |       |       |
|---------------------------|---------|-------|---------|-------|---------|---------|-------|---------|---------|---------|---------|---------|-------|---------|-------|-------|
| <b>lr_stat</b>            | 26.34   | 14.84 | 31.41   | 17.24 | 30.92   | 19.79   | 10.93 | 31.89   | 17.90   | 33.72   | 36.03   | 38.43   | 35.81 | 17.35   | 29.36 | 29.47 |
| <b>linear_aic</b>         | 31.87   | 38.89 | 21.33   | 44.22 | 41.71   | 29.74   | 7.29  | 48.45   | 15.95   | 32.13   | 23.22   | 24.32   | 51.80 | 34.43   | 37.05 | 27.53 |
| <b>spline_aic</b>         | 22.06   | 38.05 | 7.92    | 44.97 | 28.79   | 23.95   | 10.36 | 32.56   | 12.05   | 16.41   | 5.19    | -0.11   | 33.99 | 35.08   | 25.69 | 16.06 |
| <b>min_age</b>            | 80.46   | 80.91 | 91.62   | 80.91 |         |         | 63.05 |         | 89.18   | 87.68   |         | 87.86   | 71.89 |         | 80.35 | 71.14 |
| <b>min_value</b>          | 2.42    | 3.51  | 3.99    | 0.83  |         |         | 3.90  |         | 2.54    | 1.51    |         | 1.74    | 2.06  |         | 2.04  | 2.08  |
| <b>amplitude</b>          | 3.05    | 2.56  | 2.44    | 3.53  | 4.24    | 3.23    | 0.79  | 5.08    | 1.97    | 3.01    | 3.13    | 2.70    | 4.60  | 3.20    | 2.56  | 2.74  |
| <b>delta_endpoints</b>    | -1.87   | 1.01  | -2.44   | -3.33 | -3.99   | -2.98   | -0.72 | -4.92   | -1.48   | -0.48   | -3.13   | -1.78   | 2.29  | -3.20   | -0.59 | -2.25 |
| <b>n_minima</b>           | 3.20    | 3.00  | 4.00    | 4.00  | 4.00    | 1.00    | 3.00  | 2.00    | 3.00    | 3.00    | 3.00    | 2.00    | 5.00  | 4.00    | 3.00  | 4.00  |
| <b>n_maxima</b>           | 3.07    | 2.00  | 3.00    | 4.00  | 5.00    | 2.00    | 2.00  | 3.00    | 3.00    | 3.00    | 3.00    | 2.00    | 4.00  | 4.00    | 3.00  | 3.00  |
| <b>turning_points</b>     | 6.27    | 5.00  | 7.00    | 8.00  | 9.00    | 3.00    | 5.00  | 5.00    | 6.00    | 6.00    | 6.00    | 4.00    | 9.00  | 8.00    | 6.00  | 7.00  |
| <b>r_trough</b>           | 0.90    | 0.85  | 0.99    | 0.85  | 1.00    | 1.00    | 0.61  | 1.00    | 0.96    | 0.94    | 1.00    | 0.94    | 0.73  | 1.00    | 0.84  | 0.72  |
| <b>interior_indicator</b> | False   | 1.00  | 0.00    | 1.00  | 0.00    | 0.00    | 1.00  | 0.00    | 0.00    | 0.00    | 0.00    | 0.00    | 1.00  | 0.00    | 1.00  | 1.00  |
| <b>trough_indicator</b>   | True    | 1.00  | 1.00    | 1.00  | 0.00    | 0.00    | 1.00  | 0.00    | 1.00    | 1.00    | 0.00    | 1.00    | 1.00  | 0.00    | 1.00  | 1.00  |
| <b>U_D_depth</b>          | 0.23    | 0.60  | 0.00    | 0.06  | 0.00    | 0.00    | 0.09  | 0.00    | 0.09    | 0.83    | 0.00    | 0.29    | 0.50  | 0.00    | 0.77  | 0.18  |
| <b>U_I_interiority</b>    | 0.13    | 0.12  | 0.00    | 0.12  | 0.00    | 0.00    | 0.71  | 0.00    | 0.00    | 0.00    | 0.00    | 0.00    | 0.42  | 0.00    | 0.14  | 0.45  |
| <b>U_M_monotonicity</b>   | 0.51    | 0.85  | 0.75    | 0.66  | 0.00    | 0.00    | 0.67  | 0.00    | 0.80    | 0.86    | 0.00    | 0.85    | 0.71  | 0.00    | 0.82  | 0.65  |
| <b>U_C_convexity</b>      | 0.51    | 1.00  | 0.67    | 0.58  | 0.00    | 0.00    | 0.97  | 0.00    | 0.89    | 0.63    | 0.00    | 0.81    | 0.65  | 0.00    | 0.66  | 0.75  |
| <b>U_S_symmetry</b>       | 0.30    | 0.75  | 0.01    | 0.11  | 0.00    | 0.00    | 0.17  | 0.00    | 0.19    | 0.91    | 0.00    | 0.47    | 0.67  | 0.00    | 0.87  | 0.30  |
| <b>J_R_rise</b>           | 0.06    | 0.40  | 0.00    | 0.00  | 0.00    | 0.00    | 0.00  | 0.00    | 0.00    | 0.00    | 0.00    | 0.00    | 0.50  | 0.00    | 0.00  | 0.00  |
| <b>J_M_monotonicity</b>   | 0.36    | 0.39  | 0.45    | 0.41  | 0.44    | 0.22    | 0.34  | 0.25    | 0.39    | 0.31    | 0.44    | 0.32    | 0.44  | 0.34    | 0.36  | 0.38  |
| <b>J_C_rightconvex</b>    | 0.51    | 1.00  | 0.50    | 0.46  | 0.36    | 0.38    | 0.36  | 0.51    | 0.49    | 0.58    | 0.42    | 0.50    | 0.60  | 0.45    | 0.52  | 0.52  |
| <b>P_turning</b>          | 0.05    | 0.06  | 0.01    | 0.01  | 0.00    | 0.25    | 0.06  | 0.06    | 0.03    | 0.03    | 0.03    | 0.12    | 0.00  | 0.01    | 0.03  | 0.01  |
| <b>final_structure</b>    | neither | U     | neither | U     | neither | neither | U     | neither | neither | neither | neither | neither | U     | neither | U     | U     |
| <b>U_supported</b>        | False   | 1.00  | 0.00    | 1.00  | 0.00    | 0.00    | 1.00  | 0.00    | 0.00    | 0.00    | 0.00    | 0.00    | 1.00  | 0.00    | 1.00  | 1.00  |
| <b>J_supported</b>        | False   | 0.00  | 0.00    | 0.00  | 0.00    | 0.00    | 0.00  | 0.00    | 0.00    | 0.00    | 0.00    | 0.00    | 0.00  | 0.00    | 0.00  | 0.00  |

Table S6r. Brazil Cantril U-shape ratings, 2006-2024

| KPI                    | Mean  | 2005 | 2006    | 2007  | 2008  | 2009  | 2010  | 2011  | 2012  | 2013  | 2014    | 2015  | 2016  | 2017  | 2018  | 2019    | 2020 | 2021 | 2022 | 2023    | 2024 |
|------------------------|-------|------|---------|-------|-------|-------|-------|-------|-------|-------|---------|-------|-------|-------|-------|---------|------|------|------|---------|------|
| <b>shape_class</b>     | U     |      | neither | U     |       | U     |       | U     | U     | U     | neither | U     |       | U     |       | neither | U    | U    |      | neither |      |
| <b>U_beauty</b>        | 0.07  |      | 0.00    | 0.06  | 0.23  |       | 0.06  | 0.13  | 0.01  | 0.00  | 0.16    | 0.20  | 0.00  | 0.11  | 0.02  | 0.00    |      |      |      |         |      |
| <b>J_beauty</b>        | 0.01  |      | 0.00    | 0.01  | 0.01  | 0.01  | 0.00  | 0.00  | 0.00  | 0.00  | 0.03    | 0.01  | 0.00  | 0.03  | 0.00  | 0.00    |      |      |      |         |      |
| <b>Dominance</b>       | 0.65  |      | 0.68    | 0.93  | 0.93  | 0.97  | 0.96  | 1.00  | 0.68  | 0.89  | -1.00   | 0.54  | 0.87  |       |       |         |      |      |      |         |      |
| <b>best_df</b>         | 4.38  |      | 5.00    | 4.00  | 3.00  | 5.00  | 5.00  | 5.00  | 5.00  | 3.00  | 4.00    | 5.00  | 3.00  | 5.00  | 5.00  |         |      |      |      |         |      |
| <b>p_value</b>         | 0.00  |      | 0.00    | 0.00  | 0.00  | 0.00  | 0.00  | 0.00  | 0.01  | 0.00  | 0.00    | 0.00  | 0.01  | 0.00  | 0.00  |         |      |      |      |         |      |
| <b>lr_stat</b>         | 38.78 |      | 24.32   | 54.42 | 47.77 | 26.77 | 49.81 | 25.96 | 22.34 | 33.03 | 49.68   | 64.21 | 20.08 | 50.64 | 35.06 |         |      |      |      |         |      |
| <b>linear_aic</b>      | 31.05 |      | 23.85   | 38.77 | 25.27 | 18.75 | 30.13 | 8.09  | 40.24 | 26.35 | 25.06   | 47.01 | 27.55 | 52.02 | 40.51 |         |      |      |      |         |      |
| <b>spline_aic</b>      | 9.04  |      | 17.53   | 0.35  | -8.50 | 9.98  | -1.68 | 0.13  | 35.90 | 7.32  | -8.62   | 0.80  | 21.47 | 19.38 | 23.46 |         |      |      |      |         |      |
| <b>min_age</b>         | 69.12 |      | 89.18   | 77.15 | 66.81 | 72.83 | 53.09 | 60.23 |       | 42.56 | 57.41   | 88.05 | 73.77 | 79.22 |       |         |      |      |      |         |      |
| <b>min_value</b>       | 5.79  |      | 5.18    | 5.95  | 6.14  | 6.66  | 6.38  | 5.94  | 5.94  | 5.86  | 4.24    | 5.68  | 5.72  |       |       |         |      |      |      |         |      |
| <b>amplitude</b>       | 2.65  |      | 1.86    | 3.06  | 1.85  | 1.50  | 2.61  | 1.15  | 2.91  | 2.04  | 2.15    | 4.76  | 1.82  | 5.34  | 3.42  |         |      |      |      |         |      |
| <b>delta_endpoints</b> | 0.51  |      | -1.03   | 1.73  | 0.68  | 1.61  | 0.68  | -1.08 | -1.68 | 1.15  | 1.22    | 2.37  | 1.02  | 2.93  | -2.99 |         |      |      |      |         |      |
| <b>n_minima</b>        | 3.31  |      | 4.00    | 3.00  | 3.00  | 4.00  | 4.00  | 3.00  | 4.00  | 2.00  | 3.00    | 4.00  | 2.00  | 4.00  | 3.00  |         |      |      |      |         |      |
| <b>n_maxima</b>        | 2.85  |      | 3.00    | 2.00  | 2.00  | 4.00  | 3.00  | 3.00  | 4.00  | 2.00  | 2.00    | 3.00  | 1.00  | 4.00  | 4.00  |         |      |      |      |         |      |
| <b>turning_points</b>  | 6.15  |      | 7.00    | 5.00  | 5.00  | 8.00  | 7.00  | 6.00  | 8.00  | 4.00  | 5.00    | 7.00  | 3.00  | 8.00  | 7.00  |         |      |      |      |         |      |

|                           |       |         |      |      |      |      |      |         |      |      |         |      |      |         |
|---------------------------|-------|---------|------|------|------|------|------|---------|------|------|---------|------|------|---------|
| <b>r_trough</b>           | 0.74  | 0.96    | 0.80 | 0.66 | 0.74 | 0.48 | 0.58 | 1.00    | 0.34 | 0.54 | 0.95    | 0.76 | 0.83 | 1.00    |
| <b>interior_indicator</b> | True  | 0.00    | 1.00 | 1.00 | 1.00 | 1.00 | 1.00 | 0.00    | 1.00 | 1.00 | 0.00    | 1.00 | 1.00 | 0.00    |
| <b>trough_indicator</b>   | True  | 1.00    | 1.00 | 1.00 | 1.00 | 1.00 | 1.00 | 0.00    | 1.00 | 1.00 | 1.00    | 1.00 | 1.00 | 0.00    |
| <b>U_D_depth</b>          | 0.34  | 0.44    | 0.43 | 0.64 | 0.45 | 0.38 | 0.06 | 0.00    | 0.44 | 0.43 | 0.50    | 0.44 | 0.26 | 0.00    |
| <b>U_I_interiority</b>    | 0.39  | 0.00    | 0.24 | 0.59 | 0.39 | 0.95 | 0.81 | 0.00    | 0.60 | 0.90 | 0.00    | 0.36 | 0.18 | 0.00    |
| <b>U_M_monotonicity</b>   | 0.64  | 0.78    | 0.81 | 0.80 | 0.65 | 0.66 | 0.64 | 0.00    | 0.86 | 0.75 | 0.70    | 0.91 | 0.71 | 0.00    |
| <b>U_C_convexity</b>      | 0.77  | 0.67    | 0.91 | 0.96 | 0.75 | 0.76 | 1.00 | 0.65    | 1.00 | 0.99 | 0.66    | 1.00 | 0.66 | 0.00    |
| <b>U_S_symmetry</b>       | 0.48  | 0.61    | 0.61 | 0.78 | 0.66 | 0.55 | 0.11 | 0.00    | 0.61 | 0.61 | 0.67    | 0.61 | 0.48 | 0.00    |
| <b>J_R_rise</b>           | 0.36  | 0.00    | 0.57 | 0.36 | 0.45 | 0.62 | 0.00 | 0.00    | 0.56 | 0.57 | 0.50    | 0.56 | 0.55 | 0.00    |
| <b>J_M_monotonicity</b>   | 0.48  | 0.42    | 0.47 | 0.57 | 0.53 | 0.47 | 0.42 | 0.48    | 0.58 | 0.52 | 0.54    | 0.38 | 0.46 | 0.37    |
| <b>J_C_rightconvex</b>    | 0.59  | 0.51    | 0.93 | 0.52 | 0.31 | 0.64 | 0.34 | 0.46    | 1.00 | 0.67 | 0.51    | 0.95 | 0.52 | 0.36    |
| <b>P_turning</b>          | 0.05  | 0.01    | 0.06 | 0.06 | 0.01 | 0.01 | 0.03 | 0.01    | 0.12 | 0.06 | 0.01    | 0.25 | 0.01 | 0.01    |
| <b>final_structure</b>    | U     | neither | U    | U    | U    | U    | U    | neither | U    | U    | neither | U    | U    | neither |
| <b>U_supported</b>        | True  | 0.00    | 1.00 | 1.00 | 1.00 | 1.00 | 1.00 | 0.00    | 1.00 | 1.00 | 0.00    | 1.00 | 1.00 | 0.00    |
| <b>J_supported</b>        | False | 0.00    | 0.00 | 0.00 | 0.00 | 0.00 | 0.00 | 0.00    | 0.00 | 0.00 | 0.00    | 0.00 | 0.00 | 0.00    |

Table S6s. Bulgaria Cantril U-shape ratings, 2006-2024

| KPI                       | Mean    | 2005 | 2006 | 2007 | 2008 | 2009 | 2010  | 2011  | 2012    | 2013  | 2014    | 2015    | 2016    | 2017 | 2018 | 2019   | 2020    | 2021    | 2022  | 2023    | 2024    |
|---------------------------|---------|------|------|------|------|------|-------|-------|---------|-------|---------|---------|---------|------|------|--------|---------|---------|-------|---------|---------|
| <b>shape_class</b>        | neither |      |      |      |      |      | U     | U     | neither | U     | neither | neither | neither |      |      | U      | neither | neither | U     | neither | neither |
| <b>U_beauty</b>           | 0.02    |      |      |      |      |      | 0.04  | 0.03  | 0.00    | 0.06  | 0.00    | 0.00    | 0.00    |      |      | 0.00   | 0.00    | 0.00    | 0.11  | 0.00    | 0.00    |
| <b>J_beauty</b>           | 0.00    |      |      |      |      |      | 0.00  | 0.03  | 0.00    | 0.00  | 0.00    | 0.00    | 0.00    |      |      | 0.00   | 0.00    | 0.00    | 0.01  | 0.00    | 0.00    |
| <b>Dominance</b>          | 0.78    |      |      |      |      |      | 1.00  | -0.02 |         | 1.00  |         |         |         |      |      | 1.00   |         |         | 0.90  |         |         |
| <b>best_df</b>            | 4.00    |      |      |      |      |      | 3.00  | 3.00  | 3.00    | 4.00  | 5.00    | 5.00    | 3.00    |      |      | 5.00   | 5.00    | 3.00    | 5.00  | 3.00    | 5.00    |
| <b>p_value</b>            | 0.08    |      |      |      |      |      | 0.00  | 0.00  | 0.00    | 0.00  | 0.00    | 0.00    | 0.00    |      |      | 0.00   | 0.00    | 0.98    | 0.00  | 0.00    | 0.01    |
| <b>lr_stat</b>            | 33.53   |      |      |      |      |      | 34.23 | 56.74 | 24.01   | 43.16 | 32.71   | 28.59   | 28.23   |      |      | 48.64  | 38.52   | 1.45    | 46.57 | 32.26   | 20.73   |
| <b>linear_aic</b>         | 21.88   |      |      |      |      |      | 12.97 | 44.36 | 7.25    | 22.17 | 22.59   | 10.76   | 14.92   |      |      | 14.21  | 46.99   | 11.04   | 29.98 | 30.35   | 16.80   |
| <b>spline_aic</b>         | 4.35    |      |      |      |      |      | -7.26 | 1.62  | -2.77   | -5.00 | 7.88    | 0.17    | 0.69    |      |      | -16.43 | 26.47   | 23.59   | 1.41  | 12.09   | 14.07   |
| <b>min_age</b>            | 82.89   |      |      |      |      |      | 75.46 | 81.29 | 85.42   | 78.47 | 88.43   |         | 91.06   |      |      | 82.41  |         |         | 77.71 | 85.80   |         |
| <b>min_value</b>          | 3.46    |      |      |      |      |      | 3.12  | 3.35  | 3.37    | 3.28  | 2.59    |         | 3.02    |      |      | 3.78   |         |         | 4.40  | 4.19    |         |
| <b>amplitude</b>          | 2.91    |      |      |      |      |      | 2.33  | 3.66  | 2.71    | 1.68  | 3.08    | 3.61    | 2.53    |      |      | 3.39   | 4.60    | 1.72    | 2.32  | 3.48    | 2.68    |
| <b>delta_endpoints</b>    | -1.75   |      |      |      |      |      | -1.77 | 2.30  | -2.58   | -0.63 | -1.35   | -3.60   | -2.52   |      |      | -2.97  | -4.60   | -1.72   | 0.43  | -1.67   | -2.00   |
| <b>n_minima</b>           | 2.54    |      |      |      |      |      | 1.00  | 1.00  | 2.00    | 4.00  | 3.00    | 3.00    | 3.00    |      |      | 4.00   | 4.00    | 0.00    | 2.00  | 3.00    | 3.00    |
| <b>n_maxima</b>           | 2.31    |      |      |      |      |      | 0.00  | 1.00  | 1.00    | 4.00  | 2.00    | 4.00    | 2.00    |      |      | 3.00   | 4.00    | 0.00    | 2.00  | 3.00    | 4.00    |
| <b>turning_points</b>     | 4.85    |      |      |      |      |      | 1.00  | 2.00  | 3.00    | 8.00  | 5.00    | 7.00    | 5.00    |      |      | 7.00   | 8.00    | 0.00    | 4.00  | 6.00    | 7.00    |
| <b>r_trough</b>           | 0.92    |      |      |      |      |      | 0.78  | 0.86  | 0.91    | 0.82  | 0.95    | 1.00    | 0.99    |      |      | 0.87   | 1.00    | 1.00    | 0.81  | 0.92    | 1.00    |
| <b>interior_indicator</b> | False   |      |      |      |      |      | 1.00  | 1.00  | 0.00    | 1.00  | 0.00    | 0.00    | 0.00    |      |      | 1.00   | 0.00    | 0.00    | 1.00  | 0.00    | 0.00    |
| <b>trough_indicator</b>   | True    |      |      |      |      |      | 1.00  | 1.00  | 1.00    | 1.00  | 1.00    | 0.00    | 1.00    |      |      | 1.00   | 0.00    | 0.00    | 1.00  | 1.00    | 0.00    |
| <b>U_D_depth</b>          | 0.24    |      |      |      |      |      | 0.24  | 0.37  | 0.05    | 0.62  | 0.56    | 0.00    | 0.01    |      |      | 0.12   | 0.00    | 0.00    | 0.65  | 0.52    | 0.00    |
| <b>U_I_interiority</b>    | 0.07    |      |      |      |      |      | 0.30  | 0.11  | 0.00    | 0.20  | 0.00    | 0.00    | 0.00    |      |      | 0.07   | 0.00    | 0.00    | 0.23  | 0.00    | 0.00    |
| <b>U_M_monotonicity</b>   | 0.62    |      |      |      |      |      | 1.00  | 0.96  | 0.96    | 0.73  | 0.88    | 0.00    | 0.89    |      |      | 0.85   | 0.00    | 0.00    | 0.86  | 0.89    | 0.00    |
| <b>U_C_convexity</b>      | 0.67    |      |      |      |      |      | 1.00  | 1.00  | 1.00    | 0.70  | 0.64    | 0.08    | 0.98    |      |      | 0.70   | 0.00    | 0.88    | 1.00  | 0.77    | 0.03    |
| <b>U_S_symmetry</b>       | 0.33    |      |      |      |      |      | 0.39  | 0.54  | 0.09    | 0.77  | 0.72    | 0.00    | 0.01    |      |      | 0.22   | 0.00    | 0.00    | 0.87  | 0.68    | 0.00    |
| <b>J_R_rise</b>           | 0.06    |      |      |      |      |      | 0.00  | 0.63  | 0.00    | 0.00  | 0.00    | 0.00    | 0.00    |      |      | 0.00   | 0.00    | 0.00    | 0.19  | 0.00    | 0.00    |
| <b>J_M_monotonicity</b>   | 0.28    |      |      |      |      |      | 0.22  | 0.21  | 0.16    | 0.38  | 0.27    | 0.29    | 0.22    |      |      | 0.37   | 0.39    | 0.00    | 0.40  | 0.27    | 0.47    |

|                        |         |  |      |      |         |      |         |         |         |  |      |         |         |      |         |         |
|------------------------|---------|--|------|------|---------|------|---------|---------|---------|--|------|---------|---------|------|---------|---------|
| <b>J_C_rightconvex</b> | 0.62    |  | 0.67 | 1.00 | 1.00    | 0.55 | 0.55    | 0.44    | 0.44    |  | 0.55 | 0.43    | 0.46    | 1.00 | 0.56    | 0.43    |
| <b>P_turning</b>       | 0.24    |  | 1.00 | 0.50 | 0.25    | 0.01 | 0.06    | 0.01    | 0.06    |  | 0.01 | 0.01    | 1.00    | 0.12 | 0.03    | 0.01    |
| <b>final_structure</b> | neither |  | U    | U    | neither | U    | neither | neither | neither |  | U    | neither | neither | U    | neither | neither |
| <b>U_supported</b>     | False   |  | 1.00 | 1.00 | 0.00    | 1.00 | 0.00    | 0.00    | 0.00    |  | 1.00 | 0.00    | 0.00    | 1.00 | 0.00    | 0.00    |
| <b>J_supported</b>     | False   |  | 0.00 | 0.00 | 0.00    | 0.00 | 0.00    | 0.00    | 0.00    |  | 0.00 | 0.00    | 0.00    | 0.00 | 0.00    | 0.00    |

Table S6t. Burkina Faso Cantril U-shape ratings, 2006-2024

| KPI                       | Mean    | 2005 | 2006 | 2007  | 2008 | 2009 | 2010 | 2011 | 2012    | 2013 | 2014 | 2015 | 2016 | 2017 | 2018 | 2019 | 2020 | 2021    | 2022 | 2023 | 2024 |
|---------------------------|---------|------|------|-------|------|------|------|------|---------|------|------|------|------|------|------|------|------|---------|------|------|------|
| <b>shape_class</b>        | neither |      |      | U     |      |      |      |      | neither |      |      |      |      |      |      |      |      | neither |      |      |      |
| <b>U_beauty</b>           | 0.01    |      |      | 0.03  |      |      |      |      | 0.00    |      |      |      |      |      |      |      |      | 0.00    |      |      |      |
| <b>J_beauty</b>           | 0.00    |      |      | 0.00  |      |      |      |      | 0.00    |      |      |      |      |      |      |      |      | 0.00    |      |      |      |
| <b>Dominance</b>          | 0.00    |      |      | 1.00  |      |      |      |      |         |      |      |      |      |      |      |      |      | -1.00   |      |      |      |
| <b>best_df</b>            | 4.33    |      |      | 3.00  |      |      |      |      | 5.00    |      |      |      |      |      |      |      |      | 5.00    |      |      |      |
| <b>p_value</b>            | 0.00    |      |      | 0.01  |      |      |      |      | 0.00    |      |      |      |      |      |      |      |      | 0.00    |      |      |      |
| <b>lr_stat</b>            | 31.69   |      |      | 19.16 |      |      |      |      | 27.09   |      |      |      |      |      |      |      |      | 48.81   |      |      |      |
| <b>linear_aic</b>         | 35.09   |      |      | 18.24 |      |      |      |      | 30.94   |      |      |      |      |      |      |      |      | 56.09   |      |      |      |
| <b>spline_aic</b>         | 20.07   |      |      | 13.08 |      |      |      |      | 21.85   |      |      |      |      |      |      |      |      | 25.28   |      |      |      |
| <b>min_age</b>            | 78.28   |      |      | 68.69 |      |      |      |      |         |      |      |      |      |      |      |      |      | 87.86   |      |      |      |
| <b>min_value</b>          | 1.89    |      |      | 3.79  |      |      |      |      |         |      |      |      |      |      |      |      |      | -0.01   |      |      |      |
| <b>amplitude</b>          | 3.48    |      |      | 1.39  |      |      |      |      | 2.55    |      |      |      |      |      |      |      |      | 6.50    |      |      |      |
| <b>delta_endpoints</b>    | 0.13    |      |      | -0.11 |      |      |      |      | -0.54   |      |      |      |      |      |      |      |      | 1.03    |      |      |      |
| <b>n_minima</b>           | 2.67    |      |      | 2.00  |      |      |      |      | 2.00    |      |      |      |      |      |      |      |      | 4.00    |      |      |      |
| <b>n_maxima</b>           | 2.67    |      |      | 2.00  |      |      |      |      | 3.00    |      |      |      |      |      |      |      |      | 3.00    |      |      |      |
| <b>turning_points</b>     | 5.33    |      |      | 4.00  |      |      |      |      | 5.00    |      |      |      |      |      |      |      |      | 7.00    |      |      |      |
| <b>r_trough</b>           | 0.88    |      |      | 0.69  |      |      |      |      | 1.00    |      |      |      |      |      |      |      |      | 0.94    |      |      |      |
| <b>interior_indicator</b> | False   |      |      | 1.00  |      |      |      |      | 0.00    |      |      |      |      |      |      |      |      | 0.00    |      |      |      |
| <b>trough_indicator</b>   | True    |      |      | 1.00  |      |      |      |      | 0.00    |      |      |      |      |      |      |      |      | 1.00    |      |      |      |
| <b>U_D_depth</b>          | 0.32    |      |      | 0.13  |      |      |      |      | 0.00    |      |      |      |      |      |      |      |      | 0.84    |      |      |      |
| <b>U_I_interiority</b>    | 0.18    |      |      | 0.53  |      |      |      |      | 0.00    |      |      |      |      |      |      |      |      | 0.00    |      |      |      |
| <b>U_M_monotonicity</b>   | 0.48    |      |      | 0.65  |      |      |      |      | 0.00    |      |      |      |      |      |      |      |      | 0.78    |      |      |      |
| <b>U_C_convexity</b>      | 0.56    |      |      | 1.00  |      |      |      |      | 0.00    |      |      |      |      |      |      |      |      | 0.68    |      |      |      |
| <b>U_S_symmetry</b>       | 0.56    |      |      | 0.77  |      |      |      |      | 0.00    |      |      |      |      |      |      |      |      | 0.91    |      |      |      |
| <b>J_R_rise</b>           | 0.05    |      |      | 0.00  |      |      |      |      | 0.00    |      |      |      |      |      |      |      |      | 0.16    |      |      |      |
| <b>J_M_monotonicity</b>   | 0.42    |      |      | 0.54  |      |      |      |      | 0.32    |      |      |      |      |      |      |      |      | 0.42    |      |      |      |
| <b>J_C_rightconvex</b>    | 0.46    |      |      | 0.41  |      |      |      |      | 0.47    |      |      |      |      |      |      |      |      | 0.49    |      |      |      |
| <b>P_turning</b>          | 0.07    |      |      | 0.12  |      |      |      |      | 0.06    |      |      |      |      |      |      |      |      | 0.01    |      |      |      |
| <b>final_structure</b>    | neither |      |      | U     |      |      |      |      | neither |      |      |      |      |      |      |      |      | neither |      |      |      |
| <b>U_supported</b>        | False   |      |      | 1.00  |      |      |      |      | 0.00    |      |      |      |      |      |      |      |      | 0.00    |      |      |      |
| <b>J_supported</b>        | False   |      |      | 0.00  |      |      |      |      | 0.00    |      |      |      |      |      |      |      |      | 0.00    |      |      |      |

Table S6u. Burundi Cantril U-shape ratings, 2006-2024

| KPI                | Mean  | 2005 | 2006 | 2007 | 2008 | 2009 | 2010 | 2011  | 2012 | 2013 | 2014  | 2015 | 2016 | 2017 | 2018 | 2019 | 2020 | 2021 | 2022 | 2023 | 2024 |  |
|--------------------|-------|------|------|------|------|------|------|-------|------|------|-------|------|------|------|------|------|------|------|------|------|------|--|
| shape_class        | U     |      |      |      |      |      |      | U     |      |      | U     |      |      |      |      |      |      |      |      |      |      |  |
| U_beauty           | 0.01  |      |      |      |      |      |      | 0.01  |      |      | 0.00  |      |      |      |      |      |      |      |      |      |      |  |
| J_beauty           | 0.00  |      |      |      |      |      |      | 0.00  |      |      | 0.00  |      |      |      |      |      |      |      |      |      |      |  |
| Dominance          | 1.00  |      |      |      |      |      |      | 1.00  |      |      | 1.00  |      |      |      |      |      |      |      |      |      |      |  |
| best_df            | 5.00  |      |      |      |      |      |      | 5.00  |      |      | 5.00  |      |      |      |      |      |      |      |      |      |      |  |
| p_value            | 0.01  |      |      |      |      |      |      | 0.02  |      |      | 0.00  |      |      |      |      |      |      |      |      |      |      |  |
| lr_stat            | 27.15 |      |      |      |      |      |      | 20.04 |      |      | 34.26 |      |      |      |      |      |      |      |      |      |      |  |
| linear_aic         | 22.54 |      |      |      |      |      |      | 18.09 |      |      | 26.98 |      |      |      |      |      |      |      |      |      |      |  |
| spline_aic         | 13.39 |      |      |      |      |      |      | 16.05 |      |      | 10.72 |      |      |      |      |      |      |      |      |      |      |  |
| min_age            | 82.60 |      |      |      |      |      |      | 82.41 |      |      | 82.79 |      |      |      |      |      |      |      |      |      |      |  |
| min_value          | 1.35  |      |      |      |      |      |      | 2.28  |      |      | 0.41  |      |      |      |      |      |      |      |      |      |      |  |
| amplitude          | 2.39  |      |      |      |      |      |      | 1.77  |      |      | 3.01  |      |      |      |      |      |      |      |      |      |      |  |
| delta_endpoints    | -1.50 |      |      |      |      |      |      | -0.85 |      |      | -2.15 |      |      |      |      |      |      |      |      |      |      |  |
| n_minima           | 3.50  |      |      |      |      |      |      | 3.00  |      |      | 4.00  |      |      |      |      |      |      |      |      |      |      |  |
| n_maxima           | 4.00  |      |      |      |      |      |      | 4.00  |      |      | 4.00  |      |      |      |      |      |      |      |      |      |      |  |
| turning_points     | 7.50  |      |      |      |      |      |      | 7.00  |      |      | 8.00  |      |      |      |      |      |      |      |      |      |      |  |
| r_trough           | 0.87  |      |      |      |      |      |      | 0.87  |      |      | 0.88  |      |      |      |      |      |      |      |      |      |      |  |
| interior_indicator | True  |      |      |      |      |      |      | 1.00  |      |      | 1.00  |      |      |      |      |      |      |      |      |      |      |  |
| trough_indicator   | True  |      |      |      |      |      |      | 1.00  |      |      | 1.00  |      |      |      |      |      |      |      |      |      |      |  |
| U_D_depth          | 0.30  |      |      |      |      |      |      | 0.41  |      |      | 0.20  |      |      |      |      |      |      |      |      |      |      |  |
| U_I_interiority    | 0.06  |      |      |      |      |      |      | 0.07  |      |      | 0.06  |      |      |      |      |      |      |      |      |      |      |  |
| U_M_monotonicity   | 0.71  |      |      |      |      |      |      | 0.73  |      |      | 0.69  |      |      |      |      |      |      |      |      |      |      |  |
| U_C_convexity      | 0.62  |      |      |      |      |      |      | 0.61  |      |      | 0.63  |      |      |      |      |      |      |      |      |      |      |  |
| U_S_symmetry       | 0.49  |      |      |      |      |      |      | 0.63  |      |      | 0.36  |      |      |      |      |      |      |      |      |      |      |  |
| J_R_rise           | 0.00  |      |      |      |      |      |      | 0.00  |      |      | 0.00  |      |      |      |      |      |      |      |      |      |      |  |
| J_M_monotonicity   | 0.41  |      |      |      |      |      |      | 0.38  |      |      | 0.43  |      |      |      |      |      |      |      |      |      |      |  |
| J_C_rightconvex    | 0.49  |      |      |      |      |      |      | 0.48  |      |      | 0.50  |      |      |      |      |      |      |      |      |      |      |  |
| P_turning          | 0.01  |      |      |      |      |      |      | 0.01  |      |      | 0.01  |      |      |      |      |      |      |      |      |      |      |  |
| final_structure    | U     |      |      |      |      |      |      | U     |      |      | U     |      |      |      |      |      |      |      |      |      |      |  |
| U_supported        | True  |      |      |      |      |      |      | 1.00  |      |      | 1.00  |      |      |      |      |      |      |      |      |      |      |  |
| J_supported        | False |      |      |      |      |      |      | 0.00  |      |      | 0.00  |      |      |      |      |      |      |      |      |      |      |  |

Table S6v. Cambodia Cantril U-shape ratings, 2006-2024

| KPI         | Mean | 2005 | 2006 | 2007 | 2008 | 2009 | 2010 | 2011 | 2012 | 2013 | 2014 | 2015 | 2016 | 2017 | 2018 | 2019 | 2020 | 2021    | 2022 | 2023 | 2024 |      |
|-------------|------|------|------|------|------|------|------|------|------|------|------|------|------|------|------|------|------|---------|------|------|------|------|
| shape_class | U    |      |      |      |      |      |      |      |      |      |      |      |      |      |      |      |      | neither |      |      |      | U    |
| U_beauty    | 0.11 |      |      |      |      |      |      |      |      |      |      |      |      |      |      |      |      | 0.00    |      |      |      | 0.23 |
| J_beauty    | 0.00 |      |      |      |      |      |      |      |      |      |      |      |      |      |      |      |      | 0.00    |      |      |      | 0.00 |
| Dominance   | 0.99 |      |      |      |      |      |      |      |      |      |      |      |      |      |      |      |      |         |      |      |      | 0.99 |
| best_df     | 4.50 |      |      |      |      |      |      |      |      |      |      |      |      |      |      |      |      | 4.00    |      |      |      | 5.00 |
| p_value     | 0.00 |      |      |      |      |      |      |      |      |      |      |      |      |      |      |      |      | 0.00    |      |      |      | 0.00 |



|                           |         |         |      |         |
|---------------------------|---------|---------|------|---------|
| <b>r_trough</b>           | 0.86    | 0.94    | 0.69 | 0.95    |
| <b>interior_indicator</b> | False   | 0.00    | 1.00 | 0.00    |
| <b>trough_indicator</b>   | True    | 1.00    | 1.00 | 1.00    |
| <b>U_D_depth</b>          | 0.63    | 0.88    | 0.23 | 0.77    |
| <b>U_I_interiority</b>    | 0.17    | 0.00    | 0.51 | 0.00    |
| <b>U_M_monotonicity</b>   | 0.77    | 0.79    | 0.77 | 0.75    |
| <b>U_C_convexity</b>      | 0.72    | 0.72    | 0.76 | 0.67    |
| <b>U_S_symmetry</b>       | 0.74    | 0.93    | 0.38 | 0.90    |
| <b>J_R_rise</b>           | 0.26    | 0.00    | 0.77 | 0.00    |
| <b>J_M_monotonicity</b>   | 0.43    | 0.41    | 0.41 | 0.46    |
| <b>J_C_rightconvex</b>    | 0.52    | 0.48    | 0.57 | 0.51    |
| <b>P_turning</b>          | 0.02    | 0.01    | 0.03 | 0.01    |
| <b>final_structure</b>    | neither | neither | U    | neither |
| <b>U_supported</b>        | False   | 0.00    | 1.00 | 0.00    |
| <b>J_supported</b>        | False   | 0.00    | 0.00 | 0.00    |

Table S6x. Canada Cantril U-shape ratings, 2006-2024

| KPI                       | Mean    | 2005    | 2006 | 2007  | 2008 | 2009   | 2010    | 2011    | 2012   | 2013  | 2014    | 2015    | 2016    | 2017   | 2018  | 2019    | 2020  | 2021  | 2022   | 2023   | 2024  |
|---------------------------|---------|---------|------|-------|------|--------|---------|---------|--------|-------|---------|---------|---------|--------|-------|---------|-------|-------|--------|--------|-------|
| <b>shape_class</b>        | neither | neither |      | U     |      | U      | neither | neither | U      | U     | neither | neither | neither | J      | J     | neither | U     | J     | U      | J      | J     |
| <b>U_beauty</b>           | 0.02    | 0.00    |      | 0.06  |      | 0.00   | 0.00    | 0.00    | 0.11   | 0.16  | 0.00    | 0.00    | 0.00    | 0.00   | 0.00  | 0.00    | 0.03  | 0.00  | 0.04   | 0.00   | 0.00  |
| <b>J_beauty</b>           | 0.03    | 0.00    |      | 0.00  |      | 0.12   | 0.00    | 0.00    | 0.02   | 0.00  | 0.00    | 0.00    | 0.00    | 0.36   | 0.06  | 0.00    | 0.00  | 0.00  | 0.00   | 0.01   | 0.02  |
| <b>Dominance</b>          | -0.13   |         |      | 0.91  |      | -0.94  |         |         | 0.74   | 0.96  |         | -1.00   |         | -1.00  | -1.00 |         | 0.95  |       | 1.00   | -1.00  | -1.00 |
| <b>best_df</b>            | 3.94    | 4.00    |      | 5.00  |      | 3.00   | 3.00    | 5.00    | 4.00   | 5.00  | 4.00    | 5.00    | 3.00    | 3.00   | 3.00  | 3.00    | 5.00  | 3.00  | 5.00   | 4.00   | 4.00  |
| <b>p_value</b>            | 0.03    | 0.00    |      | 0.05  |      | 0.00   | 0.41    | 0.00    | 0.00   | 0.01  | 0.00    | 0.00    | 0.00    | 0.11   | 0.03  | 0.00    | 0.00  | 0.00  | 0.00   | 0.00   | 0.00  |
| <b>lr_stat</b>            | 35.61   | 49.85   |      | 17.08 |      | 60.67  | 7.23    | 64.94   | 47.33  | 23.41 | 52.82   | 25.74   | 31.17   | 11.86  | 15.44 | 31.37   | 42.59 | 31.73 | 38.38  | 52.75  | 36.58 |
| <b>linear_aic</b>         | 15.10   | 32.72   |      | 26.81 |      | 25.90  | 14.48   | 45.99   | 4.13   | -1.30 | 20.93   | 12.72   | 10.58   | -13.44 | 4.74  | 10.34   | 17.07 | 17.64 | 8.13   | 18.51  | 15.94 |
| <b>spline_aic</b>         | -4.62   | -1.12   |      | 27.73 |      | -20.77 | 21.24   | -0.95   | -27.20 | -6.71 | -15.90  | 4.98    | -6.59   | -11.30 | 3.30  | -7.03   | -7.52 | -0.09 | -12.25 | -18.25 | -4.63 |
| <b>min_age</b>            | 34.34   |         |      | 71.32 |      | 51.40  |         |         | 39.74  | 42.94 |         | 20.76   |         |        | 21.89 | 21.89   | 35.61 |       | 26.59  | 23.20  | 22.45 |
| <b>min_value</b>          | 6.79    |         |      | 7.26  |      | 7.36   |         |         | 7.32   | 7.20  |         | 6.98    |         |        | 6.61  | 6.92    | 6.73  |       | 6.18   | 6.14   | 6.00  |
| <b>amplitude</b>          | 1.81    | 3.01    |      | 1.72  |      | 2.66   | 0.94    | 4.30    | 1.18   | 0.80  | 2.02    | 1.69    | 1.10    | 1.01   | 1.29  | 1.29    | 1.77  | 1.71  | 1.41   | 2.35   | 2.33  |
| <b>delta_endpoints</b>    | 0.09    | -1.69   |      | 0.89  |      | 2.59   | -0.85   | -4.30   | 0.63   | 0.35  | -1.60   | 1.22    | -1.10   | 1.01   | 0.28  | -0.10   | 1.22  | 0.62  | 0.03   | 1.05   | 1.38  |
| <b>n_minima</b>           | 2.78    | 2.00    |      | 4.00  |      | 2.00   | 2.00    | 4.00    | 3.00   | 3.00  | 3.00    | 4.00    | 2.00    | 1.00   | 1.00  | 3.00    | 5.00  | 2.00  | 3.00   | 3.00   | 3.00  |
| <b>n_maxima</b>           | 2.44    | 2.00    |      | 3.00  |      | 1.00   | 2.00    | 4.00    | 2.00   | 3.00  | 3.00    | 3.00    | 2.00    | 1.00   | 1.00  | 3.00    | 4.00  | 3.00  | 3.00   | 2.00   | 2.00  |
| <b>turning_points</b>     | 5.22    | 4.00    |      | 7.00  |      | 3.00   | 4.00    | 8.00    | 5.00   | 6.00  | 6.00    | 7.00    | 4.00    | 2.00   | 2.00  | 6.00    | 9.00  | 5.00  | 6.00   | 5.00   | 5.00  |
| <b>r_trough</b>           | 0.42    | 1.00    |      | 0.72  |      | 0.46   | 1.00    | 1.00    | 0.30   | 0.35  | 1.00    | 0.05    | 1.00    | 0.00   | 0.07  | 0.07    | 0.25  | 0.00  | 0.13   | 0.08   | 0.07  |
| <b>interior_indicator</b> | False   | 0.00    |      | 1.00  |      | 1.00   | 0.00    | 0.00    | 1.00   | 1.00  | 0.00    | 0.00    | 0.00    | 0.00   | 0.00  | 0.00    | 1.00  | 0.00  | 1.00   | 0.00   | 0.00  |
| <b>trough_indicator</b>   | True    | 0.00    |      | 1.00  |      | 1.00   | 0.00    | 0.00    | 1.00   | 1.00  | 0.00    | 1.00    | 0.00    | 0.00   | 1.00  | 1.00    | 1.00  | 0.00  | 1.00   | 1.00   | 1.00  |
| <b>U_D_depth</b>          | 0.25    | 0.00    |      | 0.48  |      | 0.03   | 0.00    | 0.00    | 0.47   | 0.56  | 0.00    | 0.27    | 0.00    | 0.00   | 0.29  | 0.26    | 0.31  | 0.00  | 0.84   | 0.55   | 0.41  |
| <b>U_I_interiority</b>    | 0.16    | 0.00    |      | 0.44  |      | 0.90   | 0.00    | 0.00    | 0.51   | 0.61  | 0.00    | 0.00    | 0.00    | 0.00   | 0.00  | 0.00    | 0.37  | 0.00  | 0.07   | 0.00   | 0.00  |
| <b>U_M_monotonicity</b>   | 0.48    | 0.00    |      | 0.57  |      | 0.82   | 0.00    | 0.00    | 0.74   | 0.74  | 0.00    | 0.74    | 0.00    | 0.00   | 0.94  | 0.80    | 0.61  | 0.00  | 0.87   | 0.87   | 0.87  |
| <b>U_C_convexity</b>      | 0.46    | 0.00    |      | 0.65  |      | 1.00   | 0.00    | 0.00    | 0.76   | 0.78  | 0.00    | 0.63    | 0.00    | 0.00   | 0.83  | 0.76    | 0.61  | 0.00  | 0.90   | 0.73   | 0.71  |
| <b>U_S_symmetry</b>       | 0.38    | 0.00    |      | 0.65  |      | 0.05   | 0.00    | 0.00    | 0.64   | 0.72  | 0.00    | 0.43    | 0.00    | 0.00   | 0.73  | 0.87    | 0.47  | 0.00  | 0.99   | 0.71   | 0.58  |
| <b>J_R_rise</b>           | 0.36    | 0.00    |      | 0.52  |      | 0.97   | 0.00    | 0.00    | 0.53   | 0.44  | 0.00    | 0.73    | 0.00    | 1.00   | 0.21  | 0.00    | 0.69  | 0.36  | 0.02   | 0.45   | 0.59  |
| <b>J_M_monotonicity</b>   | 0.59    | 0.43    |      | 0.56  |      | 0.70   | 0.38    | 0.47    | 0.65   | 0.47  | 0.50    | 0.53    | 0.58    | 0.81   | 0.82  | 0.60    | 0.52  | 0.62  | 0.66   | 0.70   | 0.69  |

|                        |         |         |      |      |         |         |      |      |         |         |         |      |      |         |      |      |      |      |      |
|------------------------|---------|---------|------|------|---------|---------|------|------|---------|---------|---------|------|------|---------|------|------|------|------|------|
| <b>J_C_rightconvex</b> | 0.46    | 0.52    | 0.56 | 0.63 | 0.44    | 0.31    | 0.90 | 0.65 | 0.51    | 0.48    | 0.30    | 1.00 | 0.31 | 0.00    | 0.58 | 0.00 | 0.00 | 0.61 | 0.50 |
| <b>P_turning</b>       | 0.11    | 0.12    | 0.01 | 0.25 | 0.12    | 0.01    | 0.06 | 0.03 | 0.03    | 0.01    | 0.12    | 0.50 | 0.50 | 0.03    | 0.00 | 0.06 | 0.03 | 0.06 | 0.06 |
| <b>final_structure</b> | neither | neither | U    | U    | neither | neither | U    | U    | neither | neither | neither | J    | J    | neither | U    | J    | U    | J    | J    |
| <b>U_supported</b>     | False   | 0.00    | 1.00 | 1.00 | 0.00    | 0.00    | 1.00 | 1.00 | 0.00    | 0.00    | 0.00    | 0.00 | 0.00 | 0.00    | 1.00 | 0.00 | 1.00 | 1.00 | 0.00 |
| <b>J_supported</b>     | False   | 0.00    | 0.00 | 0.00 | 0.00    | 0.00    | 0.00 | 0.00 | 0.00    | 0.00    | 0.00    | 1.00 | 1.00 | 0.00    | 0.00 | 1.00 | 0.00 | 1.00 | 1.00 |

Table S6y. Chad Cantril U-shape ratings, 2006-2024

| KPI                       | Mean    | 2005 | 2006 | 2007 | 2008 | 2009 | 2010 | 2011 | 2012 | 2013 | 2014 | 2015 | 2016 | 2017 | 2018    | 2019 | 2020 | 2021 | 2022    | 2023 | 2024 |
|---------------------------|---------|------|------|------|------|------|------|------|------|------|------|------|------|------|---------|------|------|------|---------|------|------|
| <b>shape_class</b>        | neither |      |      |      |      |      |      |      |      |      |      |      |      |      | neither |      |      |      | neither |      |      |
| <b>U_beauty</b>           | 0.00    |      |      |      |      |      |      |      |      |      |      |      |      |      | 0.00    |      |      |      | 0.00    |      |      |
| <b>J_beauty</b>           | 0.00    |      |      |      |      |      |      |      |      |      |      |      |      |      | 0.00    |      |      |      | 0.00    |      |      |
| <b>Dominance</b>          |         |      |      |      |      |      |      |      |      |      |      |      |      |      |         |      |      |      |         |      |      |
| <b>best_df</b>            | 4.50    |      |      |      |      |      |      |      |      |      |      |      |      |      | 4.00    |      |      |      | 5.00    |      |      |
| <b>p_value</b>            | 0.00    |      |      |      |      |      |      |      |      |      |      |      |      |      | 0.00    |      |      |      | 0.00    |      |      |
| <b>lr_stat</b>            | 43.16   |      |      |      |      |      |      |      |      |      |      |      |      |      | 48.26   |      |      |      | 38.07   |      |      |
| <b>linear_aic</b>         | 50.34   |      |      |      |      |      |      |      |      |      |      |      |      |      | 55.61   |      |      |      | 45.07   |      |      |
| <b>spline_aic</b>         | 24.18   |      |      |      |      |      |      |      |      |      |      |      |      |      | 23.35   |      |      |      | 25.01   |      |      |
| <b>min_age</b>            | 89.93   |      |      |      |      |      |      |      |      |      |      |      |      |      | 88.24   |      |      |      | 91.62   |      |      |
| <b>min_value</b>          | 1.76    |      |      |      |      |      |      |      |      |      |      |      |      |      | 0.52    |      |      |      | 2.99    |      |      |
| <b>amplitude</b>          | 5.14    |      |      |      |      |      |      |      |      |      |      |      |      |      | 6.64    |      |      |      | 3.65    |      |      |
| <b>delta_endpoints</b>    | -1.13   |      |      |      |      |      |      |      |      |      |      |      |      |      | -0.06   |      |      |      | -2.20   |      |      |
| <b>n_minima</b>           | 3.50    |      |      |      |      |      |      |      |      |      |      |      |      |      | 3.00    |      |      |      | 4.00    |      |      |
| <b>n_maxima</b>           | 3.00    |      |      |      |      |      |      |      |      |      |      |      |      |      | 3.00    |      |      |      | 3.00    |      |      |
| <b>turning_points</b>     | 6.50    |      |      |      |      |      |      |      |      |      |      |      |      |      | 6.00    |      |      |      | 7.00    |      |      |
| <b>r_trough</b>           | 0.97    |      |      |      |      |      |      |      |      |      |      |      |      |      | 0.95    |      |      |      | 0.99    |      |      |
| <b>interior_indicator</b> | False   |      |      |      |      |      |      |      |      |      |      |      |      |      | 0.00    |      |      |      | 0.00    |      |      |
| <b>trough_indicator</b>   | True    |      |      |      |      |      |      |      |      |      |      |      |      |      | 1.00    |      |      |      | 1.00    |      |      |
| <b>U_D_depth</b>          | 0.34    |      |      |      |      |      |      |      |      |      |      |      |      |      | 0.68    |      |      |      | 0.00    |      |      |
| <b>U_I_interiority</b>    | 0.00    |      |      |      |      |      |      |      |      |      |      |      |      |      | 0.00    |      |      |      | 0.00    |      |      |
| <b>U_M_monotonicity</b>   | 0.77    |      |      |      |      |      |      |      |      |      |      |      |      |      | 0.76    |      |      |      | 0.77    |      |      |
| <b>U_C_convexity</b>      | 0.87    |      |      |      |      |      |      |      |      |      |      |      |      |      | 0.73    |      |      |      | 1.00    |      |      |
| <b>U_S_symmetry</b>       | 0.50    |      |      |      |      |      |      |      |      |      |      |      |      |      | 0.99    |      |      |      | 0.01    |      |      |
| <b>J_R_rise</b>           | 0.00    |      |      |      |      |      |      |      |      |      |      |      |      |      | 0.00    |      |      |      | 0.00    |      |      |
| <b>J_M_monotonicity</b>   | 0.43    |      |      |      |      |      |      |      |      |      |      |      |      |      | 0.45    |      |      |      | 0.41    |      |      |
| <b>J_C_rightconvex</b>    | 0.44    |      |      |      |      |      |      |      |      |      |      |      |      |      | 0.44    |      |      |      | 0.43    |      |      |
| <b>P_turning</b>          | 0.02    |      |      |      |      |      |      |      |      |      |      |      |      |      | 0.03    |      |      |      | 0.01    |      |      |
| <b>final_structure</b>    | neither |      |      |      |      |      |      |      |      |      |      |      |      |      | neither |      |      |      | neither |      |      |
| <b>U_supported</b>        | False   |      |      |      |      |      |      |      |      |      |      |      |      |      | 0.00    |      |      |      | 0.00    |      |      |
| <b>J_supported</b>        | False   |      |      |      |      |      |      |      |      |      |      |      |      |      | 0.00    |      |      |      | 0.00    |      |      |

Table S6z. Chile Cantril U-shape ratings, 2006-2024

| KPI                | Mean  | 2005 | 2006    | 2007 | 2008 | 2009    | 2010  | 2011  | 2012 | 2013 | 2014  | 2015    | 2016 | 2017  | 2018  | 2019 | 2020  | 2021    | 2022  | 2023  | 2024    |
|--------------------|-------|------|---------|------|------|---------|-------|-------|------|------|-------|---------|------|-------|-------|------|-------|---------|-------|-------|---------|
| shape_class        | U     |      | neither |      |      | neither | U     | U     |      |      | U     | neither |      | U     | U     |      | U     | neither | U     | U     | neither |
| U_beauty           | 0.12  |      | 0.00    |      |      | 0.00    | 0.30  | 0.21  |      |      | 0.00  | 0.00    |      | 0.23  | 0.44  |      | 0.16  | 0.00    | 0.16  | 0.12  | 0.00    |
| J_beauty           | 0.00  |      | 0.00    |      |      | 0.00    | 0.00  | 0.00  |      |      | 0.00  | 0.00    |      | 0.00  | 0.03  |      | 0.00  | 0.00    | 0.01  | 0.00  | 0.00    |
| Dominance          | 0.74  |      |         |      |      |         | 0.97  | 1.00  |      |      | 1.00  | -1.00   |      | 0.99  | 0.87  |      | 0.99  |         | 0.88  | 1.00  |         |
| best_df            | 3.85  |      | 3.00    |      |      | 3.00    | 4.00  | 5.00  |      |      | 4.00  | 3.00    |      | 5.00  | 3.00  |      | 5.00  | 4.00    | 3.00  | 3.00  | 5.00    |
| p_value            | 0.06  |      | 0.69    |      |      | 0.00    | 0.00  | 0.01  |      |      | 0.14  | 0.00    |      | 0.00  | 0.00  |      | 0.00  | 0.00    | 0.00  | 0.00  | 0.00    |
| lr_stat            | 34.44 |      | 4.78    |      |      | 29.86   | 29.57 | 23.20 |      |      | 12.32 | 46.04   |      | 55.37 | 37.87 |      | 37.33 | 46.80   | 48.33 | 35.24 | 41.03   |
| linear_aic         | 26.46 |      | 16.53   |      |      | 34.38   | 36.29 | 17.90 |      |      | 12.99 | 27.51   |      | 45.65 | 27.30 |      | 18.56 | 31.26   | 26.87 | 23.55 | 25.16   |
| spline_aic         | 7.71  |      | 25.75   |      |      | 18.53   | 22.72 | 12.70 |      |      | 16.67 | -4.52   |      | 8.28  | 3.43  |      | -0.77 | 0.46    | -7.46 | 2.31  | 2.14    |
| min_age            | 70.20 |      |         |      |      |         | 61.17 | 63.62 |      |      | 78.84 | 85.80   |      | 63.43 | 67.38 |      | 72.08 |         | 60.61 | 78.84 |         |
| min_value          | 5.65  |      |         |      |      |         | 5.98  | 5.87  |      |      | 5.99  | 5.08    |      | 5.34  | 5.71  |      | 5.51  |         | 5.88  | 5.52  |         |
| amplitude          | 2.31  |      | 2.45    |      |      | 2.83    | 2.34  | 1.50  |      |      | 2.06  | 2.43    |      | 3.70  | 1.81  |      | 1.48  | 3.09    | 2.15  | 1.92  | 2.25    |
| delta_endpoints    | -0.77 |      | -2.24   |      |      | -2.83   | 0.79  | -0.38 |      |      | -2.04 | 0.25    |      | 0.48  | 0.33  |      | 0.24  | -3.09   | 1.23  | -0.46 | -2.25   |
| n_minima           | 2.69  |      | 0.00    |      |      | 3.00    | 3.00  | 4.00  |      |      | 4.00  | 3.00    |      | 3.00  | 1.00  |      | 4.00  | 2.00    | 3.00  | 2.00  | 3.00    |
| n_maxima           | 2.23  |      | 1.00    |      |      | 3.00    | 2.00  | 3.00  |      |      | 4.00  | 2.00    |      | 3.00  | 0.00  |      | 3.00  | 2.00    | 2.00  | 1.00  | 3.00    |
| turning_points     | 4.92  |      | 1.00    |      |      | 6.00    | 5.00  | 7.00  |      |      | 8.00  | 5.00    |      | 6.00  | 1.00  |      | 7.00  | 4.00    | 5.00  | 3.00  | 6.00    |
| r_trough           | 0.80  |      | 1.00    |      |      | 1.00    | 0.59  | 0.62  |      |      | 0.82  | 0.92    |      | 0.62  | 0.67  |      | 0.73  | 1.00    | 0.58  | 0.82  | 1.00    |
| interior_indicator | True  |      | 0.00    |      |      | 0.00    | 1.00  | 1.00  |      |      | 1.00  | 0.00    |      | 1.00  | 1.00  |      | 1.00  | 0.00    | 1.00  | 1.00  | 0.00    |
| trough_indicator   | True  |      | 0.00    |      |      | 0.00    | 1.00  | 1.00  |      |      | 1.00  | 1.00    |      | 1.00  | 1.00  |      | 1.00  | 0.00    | 1.00  | 1.00  | 0.00    |
| U_D_depth          | 0.44  |      | 0.00    |      |      | 0.00    | 0.66  | 0.74  |      |      | 0.01  | 0.90    |      | 0.59  | 0.82  |      | 0.84  | 0.00    | 0.43  | 0.76  | 0.00    |
| U_I_interiority    | 0.33  |      | 0.00    |      |      | 0.00    | 0.78  | 0.70  |      |      | 0.19  | 0.00    |      | 0.70  | 0.57  |      | 0.41  | 0.00    | 0.80  | 0.19  | 0.00    |
| U_M_monotonicity   | 0.55  |      | 0.00    |      |      | 0.00    | 0.81  | 0.64  |      |      | 0.70  | 0.87    |      | 0.79  | 1.00  |      | 0.71  | 0.00    | 0.71  | 0.93  | 0.00    |
| U_C_convexity      | 0.56  |      | 0.00    |      |      | 0.00    | 0.81  | 0.71  |      |      | 0.66  | 0.78    |      | 0.68  | 0.96  |      | 0.66  | 0.00    | 1.00  | 0.99  | 0.00    |
| U_S_symmetry       | 0.52  |      | 0.00    |      |      | 0.00    | 0.80  | 0.85  |      |      | 0.02  | 0.95    |      | 0.90  | 0.90  |      | 0.91  | 0.00    | 0.60  | 0.86  | 0.00    |
| J_R_rise           | 0.11  |      | 0.00    |      |      | 0.00    | 0.34  | 0.00  |      |      | 0.00  | 0.10    |      | 0.13  | 0.18  |      | 0.16  | 0.00    | 0.57  | 0.00  | 0.00    |
| J_M_monotonicity   | 0.35  |      | 0.06    |      |      | 0.34    | 0.41  | 0.43  |      |      | 0.36  | 0.31    |      | 0.37  | 0.33  |      | 0.41  | 0.46    | 0.50  | 0.29  | 0.34    |
| J_C_rightconvex    | 0.58  |      | 0.33    |      |      | 0.46    | 0.73  | 0.63  |      |      | 0.52  | 0.57    |      | 0.51  | 0.68  |      | 0.60  | 0.46    | 0.58  | 1.00  | 0.46    |
| P_turning          | 0.21  |      | 1.00    |      |      | 0.03    | 0.06  | 0.01  |      |      | 0.01  | 0.06    |      | 0.03  | 1.00  |      | 0.01  | 0.12    | 0.06  | 0.25  | 0.03    |
| final_structure    | U     |      | neither |      |      | neither | U     | U     |      |      | U     | neither |      | U     | U     |      | U     | neither | U     | U     | neither |
| U_supported        | True  |      | 0.00    |      |      | 0.00    | 1.00  | 1.00  |      |      | 1.00  | 0.00    |      | 1.00  | 1.00  |      | 1.00  | 0.00    | 1.00  | 1.00  | 0.00    |
| J_supported        | False |      | 0.00    |      |      | 0.00    | 0.00  | 0.00  |      |      | 0.00  | 0.00    |      | 0.00  | 0.00  |      | 0.00  | 0.00    | 0.00  | 0.00  | 0.00    |

Table S6aa. China Cantril U-shape ratings, 2006-2024

| KPI         | Mean    | 2005 | 2006 | 2007    | 2008 | 2009 | 2010 | 2011    | 2012 | 2013 | 2014    | 2015 | 2016    | 2017    | 2018 | 2019    | 2020    | 2021 | 2022 | 2023 | 2024 |
|-------------|---------|------|------|---------|------|------|------|---------|------|------|---------|------|---------|---------|------|---------|---------|------|------|------|------|
| shape_class | neither |      |      | neither | U    |      | U    | neither | U    | U    | neither | U    | neither | neither | U    | neither | neither |      |      |      |      |
| U_beauty    | 0.09    |      |      | 0.00    | 0.32 |      | 0.08 | 0.00    | 0.41 | 0.09 | 0.00    | 0.24 | 0.00    | 0.00    | 0.08 | 0.00    | 0.00    |      |      |      |      |
| J_beauty    | 0.00    |      |      | 0.00    | 0.01 |      | 0.00 | 0.00    | 0.00 | 0.01 | 0.00    | 0.04 | 0.00    | 0.00    | 0.00 | 0.00    | 0.00    |      |      |      |      |
| Dominance   | 0.89    |      |      |         | 0.92 |      | 1.00 |         | 1.00 | 0.75 |         | 0.74 |         |         | 0.93 |         |         |      |      |      |      |
| best_df     | 4.69    |      |      | 5.00    | 4.00 |      | 5.00 | 4.00    | 5.00 | 5.00 | 5.00    | 4.00 | 5.00    | 5.00    | 5.00 | 5.00    | 4.00    |      |      |      |      |
| p_value     | 0.00    |      |      | 0.00    | 0.00 |      | 0.00 | 0.00    | 0.00 | 0.00 | 0.00    | 0.00 | 0.00    | 0.00    | 0.00 | 0.00    | 0.00    |      |      |      |      |

|                           |         |         |        |        |         |        |        |         |        |         |         |        |         |         |
|---------------------------|---------|---------|--------|--------|---------|--------|--------|---------|--------|---------|---------|--------|---------|---------|
| <b>lr_stat</b>            | 58.64   | 32.54   | 73.29  | 68.28  | 71.21   | 70.87  | 94.02  | 45.30   | 68.40  | 35.14   | 33.98   | 70.47  | 36.76   | 62.00   |
| <b>linear_aic</b>         | 24.28   | 21.06   | 15.85  | 29.78  | 21.50   | 17.94  | 54.35  | -0.97   | 31.02  | 14.30   | 19.33   | 39.59  | 18.70   | 33.14   |
| <b>spline_aic</b>         | -16.98  | 6.52    | -41.44 | -20.50 | -33.72  | -34.94 | -21.67 | -28.27  | -21.38 | -2.84   | 3.35    | -12.88 | -0.06   | -12.86  |
| <b>min_age</b>            | 64.46   |         | 49.14  | 44.07  | 87.49   | 45.76  | 56.85  | 87.86   | 48.20  | 89.37   |         | 45.95  | 89.93   |         |
| <b>min_value</b>          | 4.55    |         | 4.76   | 4.47   | 3.88    | 4.84   | 4.89   | 4.94    | 4.96   | 4.43    |         | 4.63   | 3.69    |         |
| <b>amplitude</b>          | 2.19    | 1.90    | 1.51   | 2.31   | 2.11    | 1.20   | 5.11   | 0.96    | 2.37   | 1.59    | 1.40    | 3.39   | 2.00    | 2.64    |
| <b>delta_endpoints</b>    | 0.06    | -1.43   | 0.45   | -0.56  | -0.23   | -0.33  | 3.99   | -0.40   | 1.31   | -0.94   | -0.81   | 2.44   | -1.57   | -1.13   |
| <b>n_minima</b>           | 2.85    | 4.00    | 2.00   | 2.00   | 3.00    | 1.00   | 3.00   | 3.00    | 2.00   | 4.00    | 3.00    | 3.00   | 4.00    | 3.00    |
| <b>n_maxima</b>           | 2.46    | 4.00    | 2.00   | 2.00   | 2.00    | 1.00   | 2.00   | 2.00    | 1.00   | 3.00    | 3.00    | 4.00   | 3.00    | 3.00    |
| <b>turning_points</b>     | 5.31    | 8.00    | 4.00   | 4.00   | 5.00    | 2.00   | 5.00   | 5.00    | 3.00   | 7.00    | 6.00    | 7.00   | 7.00    | 6.00    |
| <b>r_trough</b>           | 0.72    | 1.00    | 0.43   | 0.36   | 0.94    | 0.38   | 0.53   | 0.94    | 0.42   | 0.96    | 1.00    | 0.39   | 0.97    | 1.00    |
| <b>interior_indicator</b> | False   | 0.00    | 1.00   | 1.00   | 0.00    | 1.00   | 1.00   | 0.00    | 1.00   | 0.00    | 0.00    | 1.00   | 0.00    | 0.00    |
| <b>trough_indicator</b>   | True    | 0.00    | 1.00   | 1.00   | 1.00    | 1.00   | 1.00   | 1.00    | 1.00   | 1.00    | 0.00    | 1.00   | 1.00    | 0.00    |
| <b>U_D_depth</b>          | 0.34    | 0.00    | 0.52   | 0.23   | 0.89    | 0.73   | 0.22   | 0.58    | 0.45   | 0.35    | 0.00    | 0.27   | 0.15    | 0.00    |
| <b>U_I_interiority</b>    | 0.35    | 0.00    | 0.82   | 0.65   | 0.00    | 0.71   | 0.92   | 0.00    | 0.79   | 0.00    | 0.00    | 0.71   | 0.00    | 0.00    |
| <b>U_M_monotonicity</b>   | 0.64    | 0.00    | 0.90   | 0.85   | 0.84    | 0.95   | 0.85   | 0.76    | 0.90   | 0.76    | 0.00    | 0.82   | 0.73    | 0.00    |
| <b>U_C_convexity</b>      | 0.72    | 0.55    | 1.00   | 0.84   | 0.72    | 0.86   | 0.92   | 0.68    | 0.97   | 0.67    | 0.70    | 0.75   | 0.71    | 0.00    |
| <b>U_S_symmetry</b>       | 0.48    | 0.00    | 0.78   | 0.65   | 0.94    | 0.84   | 0.36   | 0.74    | 0.62   | 0.55    | 0.00    | 0.43   | 0.28    | 0.00    |
| <b>J_R_rise</b>           | 0.18    | 0.00    | 0.30   | 0.00   | 0.00    | 0.00   | 0.78   | 0.00    | 0.55   | 0.00    | 0.00    | 0.72   | 0.00    | 0.00    |
| <b>J_M_monotonicity</b>   | 0.47    | 0.46    | 0.57   | 0.46   | 0.34    | 0.56   | 0.43   | 0.45    | 0.48   | 0.44    | 0.45    | 0.48   | 0.49    | 0.53    |
| <b>J_C_rightconvex</b>    | 0.49    | 0.40    | 0.51   | 0.51   | 0.46    | 0.38   | 0.93   | 0.42    | 0.48   | 0.48    | 0.44    | 0.53   | 0.45    | 0.43    |
| <b>P_turning</b>          | 0.10    | 0.01    | 0.12   | 0.12   | 0.06    | 0.50   | 0.06   | 0.06    | 0.25   | 0.01    | 0.03    | 0.01   | 0.01    | 0.03    |
| <b>final_structure</b>    | neither | neither | U      | U      | neither | U      | U      | neither | U      | neither | neither | U      | neither | neither |
| <b>U_supported</b>        | False   | 0.00    | 1.00   | 1.00   | 0.00    | 1.00   | 1.00   | 0.00    | 1.00   | 0.00    | 0.00    | 1.00   | 0.00    | 0.00    |
| <b>J_supported</b>        | False   | 0.00    | 0.00   | 0.00   | 0.00    | 0.00   | 0.00   | 0.00    | 0.00   | 0.00    | 0.00    | 0.00   | 0.00    | 0.00    |

Table S6ab. Colombia Cantril U-shape ratings, 2006-2024

| KPI                    | Mean    | 2005 | 2006    | 2007 | 2008 | 2009 | 2010 | 2011  | 2012 | 2013  | 2014    | 2015    | 2016    | 2017 | 2018  | 2019    | 2020 | 2021 | 2022   | 2023  | 2024    |
|------------------------|---------|------|---------|------|------|------|------|-------|------|-------|---------|---------|---------|------|-------|---------|------|------|--------|-------|---------|
| <b>shape_class</b>     | neither |      | neither |      |      |      |      | U     |      | U     | neither | neither | neither |      | U     | neither |      |      | U      | U     | neither |
| <b>U_beauty</b>        | 0.09    |      | 0.00    |      |      |      |      | 0.09  |      | 0.06  | 0.00    | 0.00    | 0.00    |      | 0.09  | 0.00    |      |      | 0.69   | 0.01  | 0.00    |
| <b>J_beauty</b>        | 0.01    |      | 0.00    |      |      |      |      | 0.05  |      | 0.00  | 0.00    | 0.00    | 0.00    |      | 0.01  | 0.00    |      |      | 0.07   | 0.00  | 0.00    |
| <b>Dominance</b>       | 0.34    |      |         |      |      |      |      | 0.29  |      | 0.94  |         |         |         |      | 0.89  |         |      |      | 0.82   | 0.13  | -1.00   |
| <b>best_df</b>         | 4.00    |      | 4.00    |      |      |      |      | 4.00  |      | 5.00  | 4.00    | 3.00    | 5.00    |      | 3.00  | 5.00    |      |      | 3.00   | 3.00  | 5.00    |
| <b>p_value</b>         | 0.00    |      | 0.00    |      |      |      |      | 0.00  |      | 0.00  | 0.00    | 0.00    | 0.00    |      | 0.00  | 0.00    |      |      | 0.00   | 0.00  | 0.00    |
| <b>lr_stat</b>         | 49.47   |      | 41.57   |      |      |      |      | 51.97 |      | 38.95 | 61.81   | 35.11   | 51.78   |      | 25.33 | 47.92   |      |      | 70.08  | 35.50 | 84.15   |
| <b>linear_aic</b>      | 43.69   |      | 29.37   |      |      |      |      | 47.08 |      | 35.12 | 35.28   | 47.09   | 46.89   |      | 57.57 | 40.62   |      |      | 26.13  | 56.03 | 59.40   |
| <b>spline_aic</b>      | 10.22   |      | 3.79    |      |      |      |      | 11.11 |      | 14.17 | -10.54  | 25.98   | 13.11   |      | 46.24 | 10.69   |      |      | -29.95 | 34.53 | -6.75   |
| <b>min_age</b>         | 71.11   |      |         |      |      |      |      | 38.80 |      | 63.05 | 86.92   |         | 89.37   |      | 65.68 |         |      |      | 53.84  | 83.73 | 87.49   |
| <b>min_value</b>       | 4.23    |      |         |      |      |      |      | 5.88  |      | 6.12  | 3.71    |         | 0.80    |      | 4.62  |         |      |      | 5.31   | 4.49  | 2.89    |
| <b>amplitude</b>       | 4.35    |      | 3.59    |      |      |      |      | 4.13  |      | 2.89  | 3.53    | 4.57    | 5.82    |      | 5.52  | 3.57    |      |      | 1.68   | 5.45  | 7.12    |
| <b>delta_endpoints</b> | 0.10    |      | -3.59   |      |      |      |      | 2.66  |      | 2.11  | -0.23   | -4.38   | -4.54   |      | 3.60  | -1.32   |      |      | 0.40   | 3.32  | 3.09    |
| <b>n_minima</b>        | 3.00    |      | 3.00    |      |      |      |      | 2.00  |      | 4.00  | 4.00    | 2.00    | 3.00    |      | 3.00  | 4.00    |      |      | 1.00   | 3.00  | 4.00    |
| <b>n_maxima</b>        | 2.82    |      | 3.00    |      |      |      |      | 1.00  |      | 4.00  | 3.00    | 3.00    | 3.00    |      | 3.00  | 5.00    |      |      | 0.00   | 2.00  | 4.00    |
| <b>turning_points</b>  | 5.82    |      | 6.00    |      |      |      |      | 3.00  |      | 8.00  | 7.00    | 5.00    | 6.00    |      | 6.00  | 9.00    |      |      | 1.00   | 5.00  | 8.00    |

|                           |         |         |  |      |      |         |         |         |  |      |         |  |      |      |         |
|---------------------------|---------|---------|--|------|------|---------|---------|---------|--|------|---------|--|------|------|---------|
| <b>r_trough</b>           | 0.80    | 1.00    |  | 0.29 | 0.61 | 0.93    | 1.00    | 0.96    |  | 0.65 | 1.00    |  | 0.49 | 0.89 | 0.94    |
| <b>interior_indicator</b> | False   | 0.00    |  | 1.00 | 1.00 | 0.00    | 0.00    | 0.00    |  | 1.00 | 0.00    |  | 1.00 | 1.00 | 0.00    |
| <b>trough_indicator</b>   | True    | 0.00    |  | 1.00 | 1.00 | 1.00    | 0.00    | 1.00    |  | 1.00 | 0.00    |  | 1.00 | 1.00 | 1.00    |
| <b>U_D_depth</b>          | 0.35    | 0.00    |  | 0.36 | 0.27 | 0.93    | 0.00    | 0.20    |  | 0.35 | 0.00    |  | 0.76 | 0.39 | 0.57    |
| <b>U_I_interiority</b>    | 0.26    | 0.00    |  | 0.48 | 0.71 | 0.00    | 0.00    | 0.00    |  | 0.63 | 0.00    |  | 0.98 | 0.03 | 0.00    |
| <b>U_M_monotonicity</b>   | 0.61    | 0.00    |  | 0.84 | 0.69 | 0.87    | 0.00    | 0.89    |  | 0.72 | 0.00    |  | 1.00 | 0.91 | 0.80    |
| <b>U_C_convexity</b>      | 0.57    | 0.00    |  | 0.90 | 0.67 | 0.73    | 0.00    | 0.70    |  | 0.87 | 0.00    |  | 1.00 | 0.71 | 0.66    |
| <b>U_S_symmetry</b>       | 0.45    | 0.00    |  | 0.53 | 0.43 | 0.97    | 0.00    | 0.34    |  | 0.52 | 0.00    |  | 0.86 | 0.56 | 0.72    |
| <b>J_R_rise</b>           | 0.30    | 0.00    |  | 0.64 | 0.73 | 0.00    | 0.00    | 0.00    |  | 0.65 | 0.00    |  | 0.24 | 0.61 | 0.43    |
| <b>J_M_monotonicity</b>   | 0.40    | 0.31    |  | 0.50 | 0.54 | 0.30    | 0.34    | 0.23    |  | 0.48 | 0.51    |  | 0.51 | 0.26 | 0.40    |
| <b>J_C_rightconvex</b>    | 0.43    | 0.03    |  | 0.65 | 0.54 | 0.49    | 0.00    | 0.47    |  | 0.54 | 0.41    |  | 0.46 | 0.61 | 0.53    |
| <b>P_turning</b>          | 0.14    | 0.03    |  | 0.25 | 0.01 | 0.01    | 0.06    | 0.03    |  | 0.03 | 0.00    |  | 1.00 | 0.06 | 0.01    |
| <b>final_structure</b>    | neither | neither |  | U    | U    | neither | neither | neither |  | U    | neither |  | U    | U    | neither |
| <b>U_supported</b>        | False   | 0.00    |  | 1.00 | 1.00 | 0.00    | 0.00    | 0.00    |  | 1.00 | 0.00    |  | 1.00 | 1.00 | 0.00    |
| <b>J_supported</b>        | False   | 0.00    |  | 0.00 | 0.00 | 0.00    | 0.00    | 0.00    |  | 0.00 | 0.00    |  | 0.00 | 0.00 | 0.00    |

Table S6ac. Comoros Cantril U-shape ratings, 2006-2024

| KPI                       | Mean    | 2005 | 2006 | 2007 | 2008 | 2009    | 2010    | 2011    | 2012    | 2013 | 2014 | 2015 | 2016 | 2017 | 2018 | 2019  | 2020 | 2021 | 2022 | 2023  | 2024 |
|---------------------------|---------|------|------|------|------|---------|---------|---------|---------|------|------|------|------|------|------|-------|------|------|------|-------|------|
| <b>shape_class</b>        | neither |      |      |      |      | neither | neither | neither | neither |      |      |      |      |      |      | U     |      |      |      | U     |      |
| <b>U_beauty</b>           | 0.02    |      |      |      |      | 0.00    | 0.00    | 0.00    | 0.00    |      |      |      |      |      |      | 0.05  |      |      |      | 0.09  |      |
| <b>J_beauty</b>           | 0.00    |      |      |      |      | 0.00    | 0.00    | 0.00    | 0.00    |      |      |      |      |      |      | 0.00  |      |      |      | 0.00  |      |
| <b>Dominance</b>          | -0.01   |      |      |      |      |         |         | -1.00   | -1.00   |      |      |      |      |      |      | 0.97  |      |      |      | 0.99  |      |
| <b>best_df</b>            | 4.50    |      |      |      |      | 3.00    | 4.00    | 5.00    | 5.00    |      |      |      |      |      |      | 5.00  |      |      |      | 5.00  |      |
| <b>p_value</b>            | 0.00    |      |      |      |      | 0.00    | 0.00    | 0.00    | 0.00    |      |      |      |      |      |      | 0.00  |      |      |      | 0.00  |      |
| <b>lr_stat</b>            | 39.54   |      |      |      |      | 40.22   | 41.88   | 32.21   | 50.13   |      |      |      |      |      |      | 26.56 |      |      |      | 46.27 |      |
| <b>linear_aic</b>         | 23.48   |      |      |      |      | 15.04   | 6.78    | 20.32   | 19.87   |      |      |      |      |      |      | 43.46 |      |      |      | 35.39 |      |
| <b>spline_aic</b>         | 0.93    |      |      |      |      | -11.17  | -19.10  | 6.12    | -12.26  |      |      |      |      |      |      | 34.90 |      |      |      | 7.12  |      |
| <b>min_age</b>            | 69.68   |      |      |      |      |         |         | 85.23   | 86.92   |      |      |      |      |      |      | 35.42 |      |      |      | 71.14 |      |
| <b>min_value</b>          | 3.17    |      |      |      |      |         |         | 3.08    | 3.04    |      |      |      |      |      |      | 3.96  |      |      |      | 2.62  |      |
| <b>amplitude</b>          | 2.28    |      |      |      |      | 1.95    | 1.29    | 1.91    | 1.95    |      |      |      |      |      |      | 4.02  |      |      |      | 2.54  |      |
| <b>delta_endpoints</b>    | 0.52    |      |      |      |      | -1.78   | -1.03   | 1.26    | 1.05    |      |      |      |      |      |      | 2.71  |      |      |      | 0.88  |      |
| <b>n_minima</b>           | 3.50    |      |      |      |      | 1.00    | 3.00    | 4.00    | 4.00    |      |      |      |      |      |      | 5.00  |      |      |      | 4.00  |      |
| <b>n_maxima</b>           | 3.50    |      |      |      |      | 2.00    | 4.00    | 4.00    | 3.00    |      |      |      |      |      |      | 4.00  |      |      |      | 4.00  |      |
| <b>turning_points</b>     | 7.00    |      |      |      |      | 3.00    | 7.00    | 8.00    | 7.00    |      |      |      |      |      |      | 9.00  |      |      |      | 8.00  |      |
| <b>r_trough</b>           | 0.80    |      |      |      |      | 1.00    | 1.00    | 0.91    | 0.93    |      |      |      |      |      |      | 0.25  |      |      |      | 0.72  |      |
| <b>interior_indicator</b> | False   |      |      |      |      | 0.00    | 0.00    | 0.00    | 0.00    |      |      |      |      |      |      | 1.00  |      |      |      | 1.00  |      |
| <b>trough_indicator</b>   | True    |      |      |      |      | 0.00    | 0.00    | 1.00    | 1.00    |      |      |      |      |      |      | 1.00  |      |      |      | 1.00  |      |
| <b>U_D_depth</b>          | 0.29    |      |      |      |      | 0.00    | 0.00    | 0.34    | 0.46    |      |      |      |      |      |      | 0.33  |      |      |      | 0.59  |      |
| <b>U_I_interiority</b>    | 0.13    |      |      |      |      | 0.00    | 0.00    | 0.00    | 0.00    |      |      |      |      |      |      | 0.36  |      |      |      | 0.45  |      |
| <b>U_M_monotonicity</b>   | 0.47    |      |      |      |      | 0.00    | 0.00    | 0.75    | 0.70    |      |      |      |      |      |      | 0.76  |      |      |      | 0.63  |      |
| <b>U_C_convexity</b>      | 0.48    |      |      |      |      | 0.00    | 0.00    | 0.87    | 0.64    |      |      |      |      |      |      | 0.68  |      |      |      | 0.66  |      |
| <b>U_S_symmetry</b>       | 0.40    |      |      |      |      | 0.00    | 0.00    | 0.51    | 0.63    |      |      |      |      |      |      | 0.49  |      |      |      | 0.77  |      |
| <b>J_R_rise</b>           | 0.37    |      |      |      |      | 0.00    | 0.00    | 0.66    | 0.54    |      |      |      |      |      |      | 0.67  |      |      |      | 0.34  |      |
| <b>J_M_monotonicity</b>   | 0.46    |      |      |      |      | 0.33    | 0.46    | 0.49    | 0.54    |      |      |      |      |      |      | 0.48  |      |      |      | 0.47  |      |

|                        |         |  |         |         |         |         |  |  |      |  |      |
|------------------------|---------|--|---------|---------|---------|---------|--|--|------|--|------|
| <b>J_C_rightconvex</b> | 0.49    |  | 0.00    | 0.55    | 0.66    | 0.61    |  |  | 0.60 |  | 0.54 |
| <b>P_turning</b>       | 0.05    |  | 0.25    | 0.01    | 0.01    | 0.01    |  |  | 0.00 |  | 0.01 |
| <b>final_structure</b> | neither |  | neither | neither | neither | neither |  |  | U    |  | U    |
| <b>U_supported</b>     | False   |  | 0.00    | 0.00    | 0.00    | 0.00    |  |  | 1.00 |  | 1.00 |
| <b>J_supported</b>     | False   |  | 0.00    | 0.00    | 0.00    | 0.00    |  |  | 0.00 |  | 0.00 |

Table S6ad. Congo Brazzaville Cantril U-shape ratings, 2006-2024

| KPI                       | Mean  | 2005 | 2006 | 2007 | 2008 | 2009 | 2010 | 2011 | 2012 | 2013 | 2014 | 2015 | 2016 | 2017 | 2018 | 2019 | 2020    | 2021 | 2022 | 2023 | 2024  |
|---------------------------|-------|------|------|------|------|------|------|------|------|------|------|------|------|------|------|------|---------|------|------|------|-------|
| <b>shape_class</b>        | U     |      |      |      |      |      |      |      |      |      |      |      |      |      |      |      | neither |      |      | U    |       |
| <b>U_beauty</b>           | 0.02  |      |      |      |      |      |      |      |      |      |      |      |      |      |      |      | 0.00    |      |      |      | 0.03  |
| <b>J_beauty</b>           | 0.00  |      |      |      |      |      |      |      |      |      |      |      |      |      |      |      | 0.00    |      |      |      | 0.01  |
| <b>Dominance</b>          | 0.57  |      |      |      |      |      |      |      |      |      |      |      |      |      |      |      |         |      |      |      | 0.57  |
| <b>best_df</b>            | 4.50  |      |      |      |      |      |      |      |      |      |      |      |      |      |      |      | 5.00    |      |      |      | 4.00  |
| <b>p_value</b>            | 0.00  |      |      |      |      |      |      |      |      |      |      |      |      |      |      |      | 0.00    |      |      |      | 0.00  |
| <b>lr_stat</b>            | 62.31 |      |      |      |      |      |      |      |      |      |      |      |      |      |      |      | 58.08   |      |      |      | 66.53 |
| <b>linear_aic</b>         | 65.60 |      |      |      |      |      |      |      |      |      |      |      |      |      |      |      | 68.39   |      |      |      | 62.82 |
| <b>spline_aic</b>         | 20.30 |      |      |      |      |      |      |      |      |      |      |      |      |      |      |      | 28.30   |      |      |      | 12.29 |
| <b>min_age</b>            | 80.35 |      |      |      |      |      |      |      |      |      |      |      |      |      |      |      |         |      |      |      | 80.35 |
| <b>min_value</b>          | 2.30  |      |      |      |      |      |      |      |      |      |      |      |      |      |      |      |         |      |      |      | 2.30  |
| <b>amplitude</b>          | 8.83  |      |      |      |      |      |      |      |      |      |      |      |      |      |      |      | 9.96    |      |      |      | 7.70  |
| <b>delta_endpoints</b>    | -0.66 |      |      |      |      |      |      |      |      |      |      |      |      |      |      |      | -5.67   |      |      |      | 4.35  |
| <b>n_minima</b>           | 3.50  |      |      |      |      |      |      |      |      |      |      |      |      |      |      |      | 4.00    |      |      |      | 3.00  |
| <b>n_maxima</b>           | 3.50  |      |      |      |      |      |      |      |      |      |      |      |      |      |      |      | 5.00    |      |      |      | 2.00  |
| <b>turning_points</b>     | 7.00  |      |      |      |      |      |      |      |      |      |      |      |      |      |      |      | 9.00    |      |      |      | 5.00  |
| <b>r_trough</b>           | 0.92  |      |      |      |      |      |      |      |      |      |      |      |      |      |      |      | 1.00    |      |      |      | 0.84  |
| <b>interior_indicator</b> | False |      |      |      |      |      |      |      |      |      |      |      |      |      |      |      | 0.00    |      |      |      | 1.00  |
| <b>trough_indicator</b>   | False |      |      |      |      |      |      |      |      |      |      |      |      |      |      |      | 0.00    |      |      |      | 1.00  |
| <b>U_D_depth</b>          | 0.22  |      |      |      |      |      |      |      |      |      |      |      |      |      |      |      | 0.00    |      |      |      | 0.43  |
| <b>U_I_interiority</b>    | 0.07  |      |      |      |      |      |      |      |      |      |      |      |      |      |      |      | 0.00    |      |      |      | 0.14  |
| <b>U_M_monotonicity</b>   | 0.41  |      |      |      |      |      |      |      |      |      |      |      |      |      |      |      | 0.00    |      |      |      | 0.82  |
| <b>U_C_convexity</b>      | 0.43  |      |      |      |      |      |      |      |      |      |      |      |      |      |      |      | 0.00    |      |      |      | 0.86  |
| <b>U_S_symmetry</b>       | 0.30  |      |      |      |      |      |      |      |      |      |      |      |      |      |      |      | 0.00    |      |      |      | 0.61  |
| <b>J_R_rise</b>           | 0.28  |      |      |      |      |      |      |      |      |      |      |      |      |      |      |      | 0.00    |      |      |      | 0.57  |
| <b>J_M_monotonicity</b>   | 0.44  |      |      |      |      |      |      |      |      |      |      |      |      |      |      |      | 0.45    |      |      |      | 0.44  |
| <b>J_C_rightconvex</b>    | 0.58  |      |      |      |      |      |      |      |      |      |      |      |      |      |      |      | 0.48    |      |      |      | 0.68  |
| <b>P_turning</b>          | 0.03  |      |      |      |      |      |      |      |      |      |      |      |      |      |      |      | 0.00    |      |      |      | 0.06  |
| <b>final_structure</b>    | U     |      |      |      |      |      |      |      |      |      |      |      |      |      |      |      | neither |      |      |      | U     |
| <b>U_supported</b>        | False |      |      |      |      |      |      |      |      |      |      |      |      |      |      |      | 0.00    |      |      |      | 1.00  |
| <b>J_supported</b>        | False |      |      |      |      |      |      |      |      |      |      |      |      |      |      |      | 0.00    |      |      |      | 0.00  |

Table S6ae. Costa Rica Cantril U-shape ratings, 2006-2024

| KPI                | Mean    | 2005 | 2006 | 2007 | 2008 | 2009    | 2010  | 2011 | 2012    | 2013   | 2014 | 2015  | 2016    | 2017  | 2018    | 2019  | 2020 | 2021    | 2022    | 2023    | 2024  |
|--------------------|---------|------|------|------|------|---------|-------|------|---------|--------|------|-------|---------|-------|---------|-------|------|---------|---------|---------|-------|
| shape_class        | neither |      |      |      |      | neither | U     |      | neither | U      |      | U     | neither | U     | neither | U     |      | neither | neither | neither | U     |
| U_beauty           | 0.02    |      |      |      |      | 0.00    | 0.04  |      | 0.00    | 0.02   |      | 0.05  | 0.00    | 0.06  | 0.00    | 0.12  |      | 0.00    | 0.00    | 0.00    | 0.02  |
| J_beauty           | 0.00    |      |      |      |      | 0.00    | 0.00  |      | 0.00    | 0.00   |      | 0.01  | 0.00    | 0.00  | 0.00    | 0.00  |      | 0.00    | 0.00    | 0.00    | 0.00  |
| Dominance          | 0.14    |      |      |      |      | 0.14    | 0.89  |      | -1.00   | 1.00   |      | 0.72  | 0.00    | 0.96  | -1.00   | 0.96  |      |         | -1.00   | -1.00   | 0.82  |
| best_df            | 4.46    |      |      |      |      | 4.00    | 5.00  |      | 5.00    | 5.00   |      | 3.00  | 5.00    | 4.00  | 3.00    | 5.00  |      | 4.00    | 5.00    | 5.00    | 5.00  |
| p_value            | 0.00    |      |      |      |      | 0.00    | 0.00  |      | 0.00    | 0.00   |      | 0.00  | 0.00    | 0.00  | 0.00    | 0.00  |      | 0.00    | 0.00    | 0.00    | 0.00  |
| lr_stat            | 38.48   |      |      |      |      | 26.77   | 30.34 |      | 37.62   | 53.04  |      | 57.11 | 33.41   | 53.25 | 28.47   | 31.10 |      | 42.61   | 26.60   | 33.29   | 46.59 |
| linear_aic         | 30.89   |      |      |      |      | 12.73   | 41.47 |      | 30.18   | 20.90  |      | 45.05 | 33.62   | 27.46 | 25.84   | 30.84 |      | 28.03   | 34.04   | 29.66   | 41.74 |
| spline_aic         | 9.34    |      |      |      |      | 1.96    | 29.13 |      | 10.56   | -14.13 |      | 1.94  | 18.21   | -9.79 | 11.37   | 17.73 |      | 1.42    | 25.45   | 14.37   | 13.15 |
| min_age            | 78.26   |      |      |      |      | 86.92   | 70.95 |      | 88.05   | 73.02  |      | 77.53 |         | 78.47 | 85.23   | 44.82 |      |         | 88.43   | 88.05   | 79.41 |
| min_value          | 6.13    |      |      |      |      | 7.08    | 6.84  |      | 5.21    | 5.98   |      | 5.92  |         | 6.33  | 6.29    | 6.64  |      |         | 5.35    | 5.39    | 6.41  |
| amplitude          | 2.61    |      |      |      |      | 1.08    | 3.15  |      | 2.78    | 1.77   |      | 4.04  | 2.99    | 2.39  | 2.07    | 2.34  |      | 2.30    | 2.80    | 2.61    | 3.66  |
| delta_endpoints    | 0.33    |      |      |      |      | -0.17   | 2.19  |      | 0.40    | -1.12  |      | 2.48  | -2.33   | 0.37  | 0.56    | 1.26  |      | -2.13   | 0.35    | 0.11    | 2.35  |
| n_minima           | 3.46    |      |      |      |      | 3.00    | 4.00  |      | 4.00    | 3.00   |      | 3.00  | 4.00    | 3.00  | 3.00    | 4.00  |      | 2.00    | 5.00    | 4.00    | 3.00  |
| n_maxima           | 3.00    |      |      |      |      | 2.00    | 3.00  |      | 3.00    | 3.00   |      | 2.00  | 5.00    | 3.00  | 2.00    | 3.00  |      | 2.00    | 4.00    | 3.00    | 4.00  |
| turning_points     | 6.46    |      |      |      |      | 5.00    | 7.00  |      | 7.00    | 6.00   |      | 5.00  | 9.00    | 6.00  | 5.00    | 7.00  |      | 4.00    | 9.00    | 7.00    | 7.00  |
| r_trough           | 0.84    |      |      |      |      | 0.93    | 0.72  |      | 0.95    | 0.75   |      | 0.81  | 1.00    | 0.82  | 0.91    | 0.37  |      | 1.00    | 0.95    | 0.95    | 0.83  |
| interior_indicator | False   |      |      |      |      | 0.00    | 1.00  |      | 0.00    | 1.00   |      | 1.00  | 0.00    | 1.00  | 0.00    | 1.00  |      | 0.00    | 0.00    | 0.00    | 1.00  |
| trough_indicator   | True    |      |      |      |      | 1.00    | 1.00  |      | 1.00    | 1.00   |      | 1.00  | 0.00    | 1.00  | 1.00    | 1.00  |      | 0.00    | 1.00    | 1.00    | 1.00  |
| U_D_depth          | 0.50    |      |      |      |      | 0.85    | 0.30  |      | 0.86    | 0.20   |      | 0.39  | 0.00    | 0.62  | 0.73    | 0.46  |      | 0.00    | 0.82    | 0.96    | 0.34  |
| U_I_interiority    | 0.16    |      |      |      |      | 0.00    | 0.45  |      | 0.00    | 0.38   |      | 0.23  | 0.00    | 0.20  | 0.00    | 0.68  |      | 0.00    | 0.00    | 0.00    | 0.17  |
| U_M_monotonicity   | 0.64    |      |      |      |      | 0.83    | 0.67  |      | 0.77    | 0.68   |      | 0.88  | 0.00    | 0.71  | 0.83    | 0.68  |      | 0.00    | 0.73    | 0.76    | 0.78  |
| U_C_convexity      | 0.67    |      |      |      |      | 0.73    | 0.65  |      | 0.66    | 0.84   |      | 0.95  | 0.03    | 0.72  | 0.78    | 0.75  |      | 0.60    | 0.66    | 0.66    | 0.72  |
| U_S_symmetry       | 0.62    |      |      |      |      | 0.92    | 0.47  |      | 0.92    | 0.38   |      | 0.56  | 0.00    | 0.89  | 0.84    | 0.63  |      | 0.00    | 0.93    | 0.98    | 0.51  |
| J_R_rise           | 0.25    |      |      |      |      | 0.00    | 0.70  |      | 0.14    | 0.00   |      | 0.61  | 0.00    | 0.15  | 0.27    | 0.54  |      | 0.00    | 0.12    | 0.04    | 0.64  |
| J_M_monotonicity   | 0.43    |      |      |      |      | 0.36    | 0.43  |      | 0.43    | 0.42   |      | 0.38  | 0.44    | 0.46  | 0.37    | 0.50  |      | 0.44    | 0.50    | 0.46    | 0.44  |
| J_C_rightconvex    | 0.53    |      |      |      |      | 0.49    | 0.56  |      | 0.54    | 0.35   |      | 1.00  | 0.45    | 0.57  | 0.59    | 0.51  |      | 0.24    | 0.52    | 0.53    | 0.57  |
| P_turning          | 0.03    |      |      |      |      | 0.06    | 0.01  |      | 0.01    | 0.03   |      | 0.06  | 0.00    | 0.03  | 0.06    | 0.01  |      | 0.12    | 0.00    | 0.01    | 0.01  |
| final_structure    | neither |      |      |      |      | neither | U     |      | neither | U      |      | U     | neither | U     | neither | U     |      | neither | neither | neither | U     |
| U_supported        | False   |      |      |      |      | 0.00    | 1.00  |      | 0.00    | 1.00   |      | 1.00  | 0.00    | 1.00  | 0.00    | 1.00  |      | 0.00    | 0.00    | 0.00    | 1.00  |
| J_supported        | False   |      |      |      |      | 0.00    | 0.00  |      | 0.00    | 0.00   |      | 0.00  | 0.00    | 0.00  | 0.00    | 0.00  |      | 0.00    | 0.00    | 0.00    | 0.00  |

Table S6af. Croatia Cantril U-shape ratings, 2006-2024

| KPI         | Mean | 2005 | 2006 | 2007 | 2008 | 2009 | 2010    | 2011    | 2012 | 2013 | 2014 | 2015    | 2016 | 2017 | 2018 | 2019 | 2020 | 2021    | 2022 | 2023 | 2024 |
|-------------|------|------|------|------|------|------|---------|---------|------|------|------|---------|------|------|------|------|------|---------|------|------|------|
| shape_class | U    |      |      |      |      | U    | neither | neither | U    |      |      | neither |      |      |      | U    |      | neither |      |      | U    |
| U_beauty    | 0.04 |      |      |      |      | 0.09 | 0.00    | 0.00    | 0.01 |      |      | 0.00    |      |      |      | 0.22 |      | 0.00    |      |      | 0.02 |
| J_beauty    | 0.00 |      |      |      |      | 0.00 | 0.00    | 0.00    | 0.00 |      |      | 0.00    |      |      |      | 0.00 |      | 0.00    |      |      | 0.00 |
| Dominance   | 1.00 |      |      |      |      | 0.99 |         |         | 1.00 |      |      |         |      |      |      | 1.00 |      |         |      |      | 1.00 |
| best_df     | 4.63 |      |      |      |      | 5.00 | 5.00    | 5.00    | 5.00 |      |      | 3.00    |      |      |      | 4.00 |      | 5.00    |      |      | 5.00 |
| p_value     | 0.00 |      |      |      |      | 0.00 | 0.00    | 0.00    | 0.00 |      |      | 0.00    |      |      |      | 0.00 |      | 0.00    |      |      | 0.00 |

|                    |       |       |         |         |       |         |       |         |       |
|--------------------|-------|-------|---------|---------|-------|---------|-------|---------|-------|
| lr_stat            | 46.51 | 46.79 | 39.57   | 43.68   | 37.57 | 39.46   | 26.22 | 77.19   | 61.59 |
| linear_aic         | 30.43 | 24.84 | 13.12   | 46.27   | 29.52 | 17.66   | 16.96 | 61.21   | 33.83 |
| spline_aic         | 1.17  | -3.95 | -8.46   | 20.59   | 9.95  | -7.80   | 6.74  | 2.02    | -9.76 |
| min_age            | 77.10 | 79.97 |         |         | 80.35 |         | 69.26 |         | 78.84 |
| min_value          | 4.30  | 4.11  |         |         | 4.09  |         | 4.85  |         | 4.14  |
| amplitude          | 3.81  | 1.93  | 4.04    | 5.27    | 3.54  | 2.82    | 1.49  | 7.97    | 3.45  |
| delta_endpoints    | -2.98 | 0.19  | -4.04   | -5.08   | -2.23 | -2.69   | -0.10 | -7.71   | -2.16 |
| n_minima           | 2.50  | 3.00  | 3.00    | 3.00    | 3.00  | 1.00    | 2.00  | 3.00    | 2.00  |
| n_maxima           | 3.00  | 3.00  | 3.00    | 4.00    | 4.00  | 2.00    | 2.00  | 3.00    | 3.00  |
| turning_points     | 5.50  | 6.00  | 6.00    | 7.00    | 7.00  | 3.00    | 4.00  | 6.00    | 5.00  |
| r_trough           | 0.90  | 0.84  | 1.00    | 1.00    | 0.84  | 1.00    | 0.70  | 1.00    | 0.82  |
| interior_indicator | True  | 1.00  | 0.00    | 0.00    | 1.00  | 0.00    | 1.00  | 0.00    | 1.00  |
| trough_indicator   | True  | 1.00  | 0.00    | 0.00    | 1.00  | 0.00    | 1.00  | 0.00    | 1.00  |
| U_D_depth          | 0.27  | 0.89  | 0.00    | 0.00    | 0.26  | 0.00    | 0.78  | 0.00    | 0.25  |
| U_I_interiority    | 0.12  | 0.15  | 0.00    | 0.00    | 0.14  | 0.00    | 0.51  | 0.00    | 0.19  |
| U_M_monotonicity   | 0.39  | 0.85  | 0.00    | 0.00    | 0.77  | 0.00    | 0.73  | 0.00    | 0.79  |
| U_C_convexity      | 0.36  | 0.75  | 0.00    | 0.00    | 0.61  | 0.00    | 0.82  | 0.00    | 0.67  |
| U_S_symmetry       | 0.35  | 0.95  | 0.00    | 0.00    | 0.45  | 0.00    | 0.96  | 0.00    | 0.44  |
| J_R_rise           | 0.01  | 0.10  | 0.00    | 0.00    | 0.00  | 0.00    | 0.00  | 0.00    | 0.00  |
| J_M_monotonicity   | 0.28  | 0.36  | 0.24    | 0.30    | 0.28  | 0.23    | 0.33  | 0.29    | 0.25  |
| J_C_rightconvex    | 0.44  | 0.59  | 0.45    | 0.43    | 0.48  | 0.00    | 0.51  | 0.51    | 0.53  |
| P_turning          | 0.07  | 0.03  | 0.03    | 0.01    | 0.01  | 0.25    | 0.12  | 0.03    | 0.06  |
| final_structure    | U     | U     | neither | neither | U     | neither | U     | neither | U     |
| U_supported        | True  | 1.00  | 0.00    | 0.00    | 1.00  | 0.00    | 1.00  | 0.00    | 1.00  |
| J_supported        | False | 0.00  | 0.00    | 0.00    | 0.00  | 0.00    | 0.00  | 0.00    | 0.00  |

Table S6ag. Cyprus Cantril U-shape ratings, 2006-2024

| KPI             | Mean    | 2005 | 2006    | 2007 | 2008 | 2009 | 2010 | 2011 | 2012    | 2013 | 2014   | 2015  | 2016    | 2017  | 2018    | 2019  | 2020    | 2021   | 2022 | 2023    | 2024 |
|-----------------|---------|------|---------|------|------|------|------|------|---------|------|--------|-------|---------|-------|---------|-------|---------|--------|------|---------|------|
| shape_class     | neither |      | neither |      |      |      |      |      | neither |      | U      | U     | neither | U     | neither | U     | neither | U      |      | neither |      |
| U_beauty        | 0.09    |      | 0.00    |      |      |      |      |      | 0.00    |      | 0.31   | 0.10  | 0.00    | 0.27  | 0.00    | 0.06  | 0.00    | 0.23   |      | 0.00    |      |
| J_beauty        | 0.00    |      | 0.00    |      |      |      |      |      | 0.00    |      | 0.01   | 0.00  | 0.00    | 0.00  | 0.00    | 0.00  | 0.00    | 0.00   |      | 0.00    |      |
| Dominance       | 0.24    |      |         |      |      |      |      |      | 0.96    |      | 1.00   | -1.00 | 1.00    | -1.00 | 1.00    |       |         | 0.98   |      | -1.00   |      |
| best_df         | 4.55    |      | 4.00    |      |      |      |      |      | 5.00    |      | 5.00   | 5.00  | 5.00    | 5.00  | 5.00    | 3.00  | 4.00    | 5.00   |      | 4.00    |      |
| p_value         | 0.00    |      | 0.00    |      |      |      |      |      | 0.00    |      | 0.00   | 0.01  | 0.00    | 0.00  | 0.00    | 0.02  | 0.00    | 0.00   |      | 0.01    |      |
| lr_stat         | 38.00   |      | 25.70   |      |      |      |      |      | 29.28   |      | 67.82  | 21.87 | 29.94   | 36.06 | 63.05   | 16.31 | 45.36   | 62.59  |      | 20.02   |      |
| linear_aic      | 24.84   |      | 21.18   |      |      |      |      |      | 21.87   |      | 31.11  | 13.06 | 41.93   | 24.41 | 42.72   | 15.48 | 13.13   | 32.90  |      | 15.40   |      |
| spline_aic      | 3.93    |      | 11.48   |      |      |      |      |      | 10.58   |      | -18.70 | 9.20  | 29.98   | 6.35  | -2.33   | 13.17 | -16.23  | -11.69 |      | 11.38   |      |
| min_age         | 70.61   |      | 85.42   |      |      |      |      |      | 55.91   |      | 53.84  | 87.49 | 62.11   | 87.11 | 61.36   |       |         | 54.78  |      | 87.49   |      |
| min_value       | 5.33    |      | 5.39    |      |      |      |      |      | 5.29    |      | 5.02   | 4.27  | 5.67    | 4.91  | 5.70    |       |         | 5.77   |      | 5.91    |      |
| amplitude       | 2.23    |      | 1.68    |      |      |      |      |      | 2.07    |      | 2.37   | 1.58  | 3.72    | 1.84  | 4.08    | 1.33  | 2.16    | 2.63   |      | 1.10    |      |
| delta_endpoints | -0.13   |      | -0.56   |      |      |      |      |      | -2.07   |      | 1.13   | -1.10 | 1.11    | -0.28 | 1.92    | -1.08 | -2.16   | 1.11   |      | 0.53    |      |
| n_minima        | 3.27    |      | 3.00    |      |      |      |      |      | 4.00    |      | 3.00   | 4.00  | 3.00    | 3.00  | 4.00    | 2.00  | 2.00    | 4.00   |      | 4.00    |      |
| n_maxima        | 2.82    |      | 2.00    |      |      |      |      |      | 4.00    |      | 2.00   | 3.00  | 2.00    | 4.00  | 3.00    | 2.00  | 2.00    | 3.00   |      | 4.00    |      |
| turning_points  | 6.09    |      | 5.00    |      |      |      |      |      | 8.00    |      | 5.00   | 7.00  | 5.00    | 7.00  | 7.00    | 4.00  | 4.00    | 7.00   |      | 8.00    |      |

|                           |         |         |         |      |      |         |      |         |      |         |      |         |
|---------------------------|---------|---------|---------|------|------|---------|------|---------|------|---------|------|---------|
| <b>r_trough</b>           | 0.77    | 0.91    | 1.00    | 0.52 | 0.49 | 0.94    | 0.60 | 0.93    | 0.59 | 1.00    | 0.50 | 0.94    |
| <b>interior_indicator</b> | False   | 0.00    | 0.00    | 1.00 | 1.00 | 0.00    | 1.00 | 0.00    | 1.00 | 0.00    | 1.00 | 0.00    |
| <b>trough_indicator</b>   | True    | 1.00    | 0.00    | 1.00 | 1.00 | 1.00    | 1.00 | 1.00    | 1.00 | 0.00    | 1.00 | 1.00    |
| <b>U_D_depth</b>          | 0.43    | 0.67    | 0.00    | 0.52 | 0.30 | 0.70    | 0.72 | 0.53    | 0.19 | 0.00    | 0.58 | 0.52    |
| <b>U_I_interiority</b>    | 0.40    | 0.00    | 0.00    | 0.95 | 0.98 | 0.00    | 0.75 | 0.00    | 0.77 | 0.00    | 0.99 | 0.00    |
| <b>U_M_monotonicity</b>   | 0.63    | 0.83    | 0.00    | 0.86 | 0.69 | 0.85    | 0.73 | 0.82    | 0.75 | 0.00    | 0.66 | 0.71    |
| <b>U_C_convexity</b>      | 0.62    | 0.71    | 0.00    | 0.91 | 0.73 | 0.66    | 0.70 | 0.65    | 1.00 | 0.00    | 0.75 | 0.70    |
| <b>U_S_symmetry</b>       | 0.56    | 0.80    | 0.00    | 0.69 | 0.47 | 0.82    | 0.91 | 0.69    | 0.32 | 0.00    | 0.73 | 0.69    |
| <b>J_R_rise</b>           | 0.20    | 0.00    | 0.00    | 0.48 | 0.00 | 0.30    | 0.00 | 0.47    | 0.00 | 0.00    | 0.42 | 0.48    |
| <b>J_M_monotonicity</b>   | 0.41    | 0.37    | 0.45    | 0.45 | 0.37 | 0.32    | 0.41 | 0.37    | 0.46 | 0.30    | 0.51 | 0.52    |
| <b>J_C_rightconvex</b>    | 0.48    | 0.69    | 0.56    | 0.53 | 0.57 | 0.52    | 0.50 | 0.54    | 0.06 | 0.30    | 0.56 | 0.45    |
| <b>P_turning</b>          | 0.05    | 0.06    | 0.01    | 0.06 | 0.01 | 0.06    | 0.01 | 0.01    | 0.12 | 0.12    | 0.01 | 0.01    |
| <b>final_structure</b>    | neither | neither | neither | U    | U    | neither | U    | neither | U    | neither | U    | neither |
| <b>U_supported</b>        | False   | 0.00    | 0.00    | 1.00 | 1.00 | 0.00    | 1.00 | 0.00    | 1.00 | 0.00    | 1.00 | 0.00    |
| <b>J_supported</b>        | False   | 0.00    | 0.00    | 0.00 | 0.00 | 0.00    | 0.00 | 0.00    | 0.00 | 0.00    | 0.00 | 0.00    |

Table S6ah. Czech Republic Cantril U-shape ratings, 2006-2024

| KPI                       | Mean    | 2005 | 2006 | 2007    | 2008 | 2009 | 2010    | 2011    | 2012 | 2013    | 2014    | 2015    | 2016    | 2017    | 2018    | 2019 | 2020    | 2021  | 2022    | 2023    | 2024    |
|---------------------------|---------|------|------|---------|------|------|---------|---------|------|---------|---------|---------|---------|---------|---------|------|---------|-------|---------|---------|---------|
| <b>shape_class</b>        | neither |      |      | neither |      |      | neither | neither |      | neither | neither | neither | neither | neither | neither |      | neither | U     | neither | neither | neither |
| <b>U_beauty</b>           | 0.00    |      |      | 0.00    |      |      | 0.00    | 0.00    |      | 0.00    | 0.00    | 0.00    | 0.00    | 0.00    | 0.00    |      | 0.00    | 0.00  | 0.00    | 0.00    | 0.00    |
| <b>J_beauty</b>           | 0.00    |      |      | 0.00    |      |      | 0.00    | 0.00    |      | 0.00    | 0.00    | 0.00    | 0.00    | 0.00    | 0.00    |      | 0.00    | 0.00  | 0.00    | 0.00    | 0.00    |
| <b>Dominance</b>          | 1.00    |      |      |         |      |      |         |         |      |         |         |         |         |         |         |      |         | 1.00  |         |         |         |
| <b>best_df</b>            | 4.14    |      |      | 3.00    |      |      | 5.00    | 4.00    |      | 4.00    | 5.00    | 5.00    | 3.00    | 3.00    | 5.00    |      | 5.00    | 5.00  | 3.00    | 5.00    | 3.00    |
| <b>p_value</b>            | 0.01    |      |      | 0.11    |      |      | 0.00    | 0.00    |      | 0.00    | 0.00    | 0.00    | 0.00    | 0.01    | 0.00    |      | 0.00    | 0.00  | 0.00    | 0.00    | 0.01    |
| <b>lr_stat</b>            | 34.45   |      |      | 11.83   |      |      | 30.41   | 24.36   |      | 52.22   | 54.18   | 25.19   | 42.89   | 19.75   | 47.12   |      | 40.94   | 26.24 | 30.95   | 56.15   | 20.14   |
| <b>linear_aic</b>         | 14.07   |      |      | 10.23   |      |      | -2.34   | 23.90   |      | 25.08   | 24.60   | -11.15  | 18.25   | 7.33    | 28.11   |      | 30.14   | 7.84  | 13.17   | 16.62   | 5.22    |
| <b>spline_aic</b>         | -4.10   |      |      | 12.41   |      |      | -14.75  | 15.54   |      | -11.14  | -11.58  | -18.34  | -10.65  | 1.58    | -1.01   |      | 7.21    | -0.40 | -3.78   | -21.53  | -0.91   |
| <b>min_age</b>            | 86.34   |      |      | 87.49   |      |      | 85.80   | 88.62   |      | 85.80   | 89.37   | 90.87   | 86.55   |         |         |      |         | 74.89 |         |         | 87.11   |
| <b>min_value</b>          | 5.02    |      |      | 4.43    |      |      |         | 3.09    |      |         | 5.18    | 5.24    |         | 4.96    | 4.65    |      |         | 6.58  |         |         | 6.08    |
| <b>amplitude</b>          | 2.76    |      |      | 3.28    |      |      | 3.34    | 4.42    |      | 3.77    | 2.04    | 2.32    | 3.54    | 2.98    | 3.26    |      | 2.59    | 1.16  | 2.41    | 2.17    | 1.37    |
| <b>delta_endpoints</b>    | -2.24   |      |      | -2.65   |      |      | -3.34   | -3.50   |      | -3.77   | -0.22   | -2.06   | -3.28   | -2.97   | -0.91   |      | -2.50   | -0.93 | -2.32   | -2.17   | -0.79   |
| <b>n_minima</b>           | 3.00    |      |      | 1.00    |      |      | 1.00    | 4.00    |      | 4.00    | 4.00    | 3.00    | 3.00    | 3.00    | 2.00    |      | 4.00    | 4.00  | 3.00    | 3.00    | 3.00    |
| <b>n_maxima</b>           | 2.71    |      |      | 0.00    |      |      | 1.00    | 3.00    |      | 4.00    | 4.00    | 2.00    | 4.00    | 2.00    | 1.00    |      | 4.00    | 4.00  | 4.00    | 3.00    | 2.00    |
| <b>turning_points</b>     | 5.71    |      |      | 1.00    |      |      | 2.00    | 7.00    |      | 8.00    | 8.00    | 5.00    | 7.00    | 5.00    | 3.00    |      | 8.00    | 8.00  | 7.00    | 6.00    | 5.00    |
| <b>r_trough</b>           | 0.96    |      |      | 0.94    |      |      | 1.00    | 0.95    |      | 1.00    | 0.92    | 0.96    | 1.00    | 0.98    | 0.93    |      | 1.00    | 0.77  | 1.00    | 1.00    | 0.93    |
| <b>interior_indicator</b> | False   |      |      | 0.00    |      |      | 0.00    | 0.00    |      | 0.00    | 0.00    | 0.00    | 0.00    | 0.00    | 0.00    |      | 0.00    | 1.00  | 0.00    | 0.00    | 0.00    |
| <b>trough_indicator</b>   | True    |      |      | 1.00    |      |      | 0.00    | 1.00    |      | 0.00    | 1.00    | 1.00    | 0.00    | 1.00    | 1.00    |      | 0.00    | 1.00  | 0.00    | 0.00    | 1.00    |
| <b>U_D_depth</b>          | 0.18    |      |      | 0.19    |      |      | 0.00    | 0.21    |      | 0.00    | 0.89    | 0.11    | 0.00    | 0.01    | 0.72    |      | 0.00    | 0.02  | 0.00    | 0.00    | 0.42    |
| <b>U_I_interiority</b>    | 0.02    |      |      | 0.00    |      |      | 0.00    | 0.00    |      | 0.00    | 0.00    | 0.00    | 0.00    | 0.00    | 0.00    |      | 0.00    | 0.32  | 0.00    | 0.00    | 0.00    |
| <b>U_M_monotonicity</b>   | 0.49    |      |      | 1.00    |      |      | 0.00    | 0.85    |      | 0.00    | 0.88    | 0.91    | 0.00    | 0.93    | 0.93    |      | 0.00    | 0.62  | 0.00    | 0.00    | 0.78    |
| <b>U_C_convexity</b>      | 0.54    |      |      | 0.84    |      |      | 0.58    | 0.76    |      | 0.00    | 0.63    | 0.69    | 0.00    | 0.98    | 0.68    |      | 0.75    | 0.82  | 0.00    | 0.00    | 0.82    |
| <b>U_S_symmetry</b>       | 0.24    |      |      | 0.32    |      |      | 0.00    | 0.34    |      | 0.00    | 0.94    | 0.20    | 0.00    | 0.01    | 0.84    |      | 0.00    | 0.04  | 0.00    | 0.00    | 0.59    |
| <b>J_R_rise</b>           | 0.00    |      |      | 0.00    |      |      | 0.00    | 0.00    |      | 0.00    | 0.00    | 0.00    | 0.00    | 0.00    | 0.00    |      | 0.00    | 0.00  | 0.00    | 0.00    | 0.00    |
| <b>J_M_monotonicity</b>   | 0.29    |      |      | 0.06    |      |      | 0.07    | 0.32    |      | 0.39    | 0.30    | 0.21    | 0.28    | 0.16    | 0.20    |      | 0.44    | 0.49  | 0.34    | 0.39    | 0.43    |

|                        |         |         |         |         |         |         |         |         |         |         |         |      |         |         |         |
|------------------------|---------|---------|---------|---------|---------|---------|---------|---------|---------|---------|---------|------|---------|---------|---------|
| <b>J_C_rightconvex</b> | 0.48    | 0.54    | 0.42    | 0.46    | 0.52    | 0.70    | 0.53    | 0.45    | 0.45    | 0.50    | 0.46    | 0.43 | 0.45    | 0.23    | 0.54    |
| <b>P_turning</b>       | 0.15    | 1.00    | 0.50    | 0.01    | 0.01    | 0.01    | 0.06    | 0.01    | 0.06    | 0.25    | 0.01    | 0.01 | 0.01    | 0.03    | 0.06    |
| <b>final_structure</b> | neither | U    | neither | neither | neither |
| <b>U_supported</b>     | False   | 0.00    | 0.00    | 0.00    | 0.00    | 0.00    | 0.00    | 0.00    | 0.00    | 0.00    | 0.00    | 0.00 | 0.00    | 1.00    | 0.00    |
| <b>J_supported</b>     | False   | 0.00    | 0.00    | 0.00    | 0.00    | 0.00    | 0.00    | 0.00    | 0.00    | 0.00    | 0.00    | 0.00 | 0.00    | 0.00    | 0.00    |

Table S6ai. Denmark Cantril U-shape ratings, 2006-2024

| KPI                       | Mean    | 2005    | 2006 | 2007    | 2008    | 2009 | 2010    | 2011  | 2012    | 2013 | 2014    | 2015    | 2016    | 2017    | 2018    | 2019    | 2020    | 2021    | 2022    | 2023   | 2024   |
|---------------------------|---------|---------|------|---------|---------|------|---------|-------|---------|------|---------|---------|---------|---------|---------|---------|---------|---------|---------|--------|--------|
| <b>shape_class</b>        | neither | neither |      | neither | neither |      | neither | U     | neither |      | neither | U       | U      |        |
| <b>U_beauty</b>           | 0.00    | 0.00    |      | 0.00    | 0.00    |      | 0.00    | 0.02  | 0.00    |      | 0.00    | 0.00    | 0.00    | 0.00    | 0.00    | 0.00    | 0.00    | 0.00    | 0.00    | 0.00   | 0.00   |
| <b>J_beauty</b>           | 0.00    | 0.00    |      | 0.00    | 0.00    |      | 0.01    | 0.00  | 0.00    |      | 0.00    | 0.00    | 0.00    | 0.00    | 0.00    | 0.00    | 0.00    | 0.00    | 0.00    | 0.00   | 0.00   |
| <b>Dominance</b>          | -0.40   |         |      | -1.00   | -1.00   |      | -1.00   | 0.69  |         |      |         |         |         |         |         |         |         |         | -1.00   | 0.77   | -0.28  |
| <b>best_df</b>            | 3.94    | 4.00    |      | 5.00    | 4.00    |      | 3.00    | 3.00  | 5.00    |      | 3.00    | 3.00    | 4.00    | 3.00    | 5.00    | 3.00    | 3.00    |         | 5.00    | 5.00   | 5.00   |
| <b>p_value</b>            | 0.00    | 0.00    |      | 0.00    | 0.00    |      | 0.00    | 0.01  | 0.00    |      | 0.00    | 0.00    | 0.00    | 0.00    | 0.00    | 0.00    | 0.00    |         | 0.01    | 0.00   | 0.01   |
| <b>lr_stat</b>            | 32.98   | 34.12   |      | 45.64   | 33.04   |      | 20.53   | 18.07 | 73.27   |      | 33.37   | 20.98   | 37.02   | 33.81   | 34.46   | 43.60   | 21.04   |         | 21.50   | 36.59  | 20.56  |
| <b>linear_aic</b>         | 9.54    | 8.59    |      | 23.62   | 14.78   |      | 7.24    | -4.63 | 28.31   |      | -7.71   | 6.64    | -1.57   | 20.23   | 15.36   | 6.44    | 13.05   |         | 23.44   | 8.25   | -9.46  |
| <b>spline_aic</b>         | -7.56   | -9.54   |      | -4.02   | -2.26   |      | 0.71    | -8.69 | -26.96  |      | -27.08  | -0.34   | -22.59  | 0.42    | -1.10   | -23.16  | 6.01    |         | 19.94   | -10.34 | -12.02 |
| <b>min_age</b>            | 60.02   |         |      | 88.05   | 20.57   |      | 85.80   | 54.22 |         |      |         |         |         |         |         |         | 87.86   |         | 88.80   | 27.34  | 27.53  |
| <b>min_value</b>          | 7.14    |         |      | 6.94    | 7.35    |      | 7.27    | 7.52  |         |      |         |         |         |         |         |         | 7.02    |         | 6.59    | 7.05   | 7.40   |
| <b>amplitude</b>          | 1.34    | 1.22    |      | 2.05    | 1.64    |      | 1.01    | 0.55  | 2.53    |      | 0.55    | 0.82    | 0.86    | 1.75    | 1.65    | 1.11    | 1.21    |         | 2.18    | 1.45   | 0.83   |
| <b>delta_endpoints</b>    | -0.22   | -1.01   |      | 1.10    | 1.05    |      | 0.36    | 0.40  | -2.19   |      | -0.55   | -0.33   | -0.66   | -1.35   | -1.24   | -0.77   | -0.12   |         | 0.94    | 0.27   | 0.51   |
| <b>n_minima</b>           | 3.00    | 3.00    |      | 4.00    | 4.00    |      | 3.00    | 3.00  | 3.00    |      | 1.00    | 2.00    | 3.00    | 2.00    | 4.00    | 2.00    | 3.00    |         | 4.00    | 4.00   | 3.00   |
| <b>n_maxima</b>           | 3.06    | 3.00    |      | 4.00    | 3.00    |      | 2.00    | 4.00  | 3.00    |      | 1.00    | 2.00    | 3.00    | 3.00    | 4.00    | 3.00    | 2.00    |         | 4.00    | 4.00   | 4.00   |
| <b>turning_points</b>     | 6.06    | 6.00    |      | 8.00    | 7.00    |      | 5.00    | 7.00  | 6.00    |      | 2.00    | 4.00    | 6.00    | 5.00    | 8.00    | 5.00    | 5.00    |         | 8.00    | 8.00   | 7.00   |
| <b>r_trough</b>           | 0.79    | 1.00    |      | 0.95    | 0.05    |      | 0.92    | 0.50  | 1.00    |      | 1.00    | 1.00    | 1.00    | 1.00    | 1.00    | 1.00    | 0.94    |         | 0.96    | 0.14   | 0.14   |
| <b>interior_indicator</b> | False   | 0.00    |      | 0.00    | 0.00    |      | 0.00    | 1.00  | 0.00    |      | 0.00    | 0.00    | 0.00    | 0.00    | 0.00    | 0.00    | 0.00    |         | 0.00    | 1.00   | 1.00   |
| <b>trough_indicator</b>   | False   | 0.00    |      | 1.00    | 1.00    |      | 1.00    | 1.00  | 0.00    |      | 0.00    | 0.00    | 0.00    | 0.00    | 0.00    | 0.00    | 1.00    |         | 1.00    | 1.00   | 1.00   |
| <b>U_D_depth</b>          | 0.16    | 0.00    |      | 0.46    | 0.36    |      | 0.64    | 0.10  | 0.00    |      | 0.00    | 0.00    | 0.00    | 0.00    | 0.00    | 0.00    | 0.52    |         | 0.21    | 0.12   | 0.09   |
| <b>U_I_interiority</b>    | 0.07    | 0.00    |      | 0.00    | 0.00    |      | 0.00    | 0.99  | 0.00    |      | 0.00    | 0.00    | 0.00    | 0.00    | 0.00    | 0.00    | 0.00    |         | 0.00    | 0.09   | 0.10   |
| <b>U_M_monotonicity</b>   | 0.34    | 0.00    |      | 0.73    | 0.73    |      | 0.73    | 0.60  | 0.00    |      | 0.00    | 0.00    | 0.00    | 0.00    | 0.00    | 0.00    | 0.65    |         | 0.67    | 0.67   | 0.64   |
| <b>U_C_convexity</b>      | 0.46    | 0.63    |      | 0.66    | 0.73    |      | 0.82    | 0.86  | 0.00    |      | 1.00    | 0.00    | 0.00    | 0.00    | 0.00    | 0.00    | 0.82    |         | 0.67    | 0.59   | 0.56   |
| <b>U_S_symmetry</b>       | 0.27    | 0.00    |      | 0.63    | 0.53    |      | 0.78    | 0.21  | 0.00    |      | 0.00    | 0.00    | 0.00    | 0.00    | 0.00    | 0.00    | 0.92    |         | 0.49    | 0.57   | 0.23   |
| <b>J_R_rise</b>           | 0.22    | 0.00    |      | 0.54    | 0.64    |      | 0.36    | 0.73  | 0.00    |      | 0.00    | 0.00    | 0.00    | 0.00    | 0.00    | 0.00    | 0.00    |         | 0.43    | 0.19   | 0.62   |
| <b>J_M_monotonicity</b>   | 0.49    | 0.43    |      | 0.50    | 0.51    |      | 0.51    | 0.52  | 0.54    |      | 0.27    | 0.43    | 0.50    | 0.49    | 0.48    | 0.45    | 0.60    |         | 0.57    | 0.59   | 0.55   |
| <b>J_C_rightconvex</b>    | 0.44    | 0.28    |      | 0.56    | 0.79    |      | 0.60    | 0.58  | 0.45    |      | 0.49    | 0.31    | 0.51    | 0.00    | 0.43    | 0.00    | 0.51    |         | 0.52    | 0.46   | 0.52   |
| <b>P_turning</b>          | 0.06    | 0.03    |      | 0.01    | 0.01    |      | 0.06    | 0.01  | 0.03    |      | 0.50    | 0.12    | 0.03    | 0.06    | 0.01    | 0.06    | 0.06    |         | 0.01    | 0.01   | 0.01   |
| <b>final_structure</b>    | neither | neither |      | neither | neither |      | neither | U     | neither |      | neither |         | neither | U      | U      |
| <b>U_supported</b>        | False   | 0.00    |      | 0.00    | 0.00    |      | 0.00    | 1.00  | 0.00    |      | 0.00    | 0.00    | 0.00    | 0.00    | 0.00    | 0.00    | 0.00    |         | 0.00    | 1.00   | 1.00   |
| <b>J_supported</b>        | False   | 0.00    |      | 0.00    | 0.00    |      | 0.00    | 0.00  | 0.00    |      | 0.00    | 0.00    | 0.00    | 0.00    | 0.00    | 0.00    | 0.00    |         | 0.00    | 0.00   | 0.00   |

Table S6aj. Djibouti Cantril U-shape ratings, 2006-2024

| KPI                | Mean  | 2005 | 2006 | 2007 | 2008 | 2009 | 2010 | 2011  | 2012 | 2013 | 2014 | 2015 | 2016 | 2017 | 2018 | 2019 | 2020 | 2021 | 2022 | 2023 | 2024 |  |
|--------------------|-------|------|------|------|------|------|------|-------|------|------|------|------|------|------|------|------|------|------|------|------|------|--|
| shape_class        | U     |      |      |      |      |      |      | U     |      |      |      |      |      |      |      |      |      |      |      |      |      |  |
| U_beauty           | 0.05  |      |      |      |      |      |      | 0.05  |      |      |      |      |      |      |      |      |      |      |      |      |      |  |
| J_beauty           | 0.00  |      |      |      |      |      |      | 0.00  |      |      |      |      |      |      |      |      |      |      |      |      |      |  |
| Dominance          | 0.87  |      |      |      |      |      |      | 0.87  |      |      |      |      |      |      |      |      |      |      |      |      |      |  |
| best_df            | 3.00  |      |      |      |      |      |      | 3.00  |      |      |      |      |      |      |      |      |      |      |      |      |      |  |
| p_value            | 0.02  |      |      |      |      |      |      | 0.02  |      |      |      |      |      |      |      |      |      |      |      |      |      |  |
| lr_stat            | 16.40 |      |      |      |      |      |      | 16.40 |      |      |      |      |      |      |      |      |      |      |      |      |      |  |
| linear_aic         | 34.37 |      |      |      |      |      |      | 34.37 |      |      |      |      |      |      |      |      |      |      |      |      |      |  |
| spline_aic         | 31.97 |      |      |      |      |      |      | 31.97 |      |      |      |      |      |      |      |      |      |      |      |      |      |  |
| min_age            | 65.50 |      |      |      |      |      |      | 65.50 |      |      |      |      |      |      |      |      |      |      |      |      |      |  |
| min_value          | 3.73  |      |      |      |      |      |      | 3.73  |      |      |      |      |      |      |      |      |      |      |      |      |      |  |
| amplitude          | 2.25  |      |      |      |      |      |      | 2.25  |      |      |      |      |      |      |      |      |      |      |      |      |      |  |
| delta_endpoints    | 1.35  |      |      |      |      |      |      | 1.35  |      |      |      |      |      |      |      |      |      |      |      |      |      |  |
| n_minima           | 3.00  |      |      |      |      |      |      | 3.00  |      |      |      |      |      |      |      |      |      |      |      |      |      |  |
| n_maxima           | 3.00  |      |      |      |      |      |      | 3.00  |      |      |      |      |      |      |      |      |      |      |      |      |      |  |
| turning_points     | 6.00  |      |      |      |      |      |      | 6.00  |      |      |      |      |      |      |      |      |      |      |      |      |      |  |
| r_trough           | 0.65  |      |      |      |      |      |      | 0.65  |      |      |      |      |      |      |      |      |      |      |      |      |      |  |
| interior_indicator | True  |      |      |      |      |      |      | 1.00  |      |      |      |      |      |      |      |      |      |      |      |      |      |  |
| trough_indicator   | True  |      |      |      |      |      |      | 1.00  |      |      |      |      |      |      |      |      |      |      |      |      |      |  |
| U_D_depth          | 0.23  |      |      |      |      |      |      | 0.23  |      |      |      |      |      |      |      |      |      |      |      |      |      |  |
| U_I_interiority    | 0.63  |      |      |      |      |      |      | 0.63  |      |      |      |      |      |      |      |      |      |      |      |      |      |  |
| U_M_monotonicity   | 0.65  |      |      |      |      |      |      | 0.65  |      |      |      |      |      |      |      |      |      |      |      |      |      |  |
| U_C_convexity      | 0.95  |      |      |      |      |      |      | 0.95  |      |      |      |      |      |      |      |      |      |      |      |      |      |  |
| U_S_symmetry       | 0.44  |      |      |      |      |      |      | 0.44  |      |      |      |      |      |      |      |      |      |      |      |      |      |  |
| J_R_rise           | 0.60  |      |      |      |      |      |      | 0.60  |      |      |      |      |      |      |      |      |      |      |      |      |      |  |
| J_M_monotonicity   | 0.56  |      |      |      |      |      |      | 0.56  |      |      |      |      |      |      |      |      |      |      |      |      |      |  |
| J_C_rightconvex    | 0.08  |      |      |      |      |      |      | 0.08  |      |      |      |      |      |      |      |      |      |      |      |      |      |  |
| P_turning          | 0.03  |      |      |      |      |      |      | 0.03  |      |      |      |      |      |      |      |      |      |      |      |      |      |  |
| final_structure    | U     |      |      |      |      |      |      | U     |      |      |      |      |      |      |      |      |      |      |      |      |      |  |
| U_supported        | True  |      |      |      |      |      |      | 1.00  |      |      |      |      |      |      |      |      |      |      |      |      |      |  |
| J_supported        | False |      |      |      |      |      |      | 0.00  |      |      |      |      |      |      |      |      |      |      |      |      |      |  |

Table S6ak. Dominican Republic Cantril U-shape ratings, 2006-2024

| KPI         | Mean | 2005 | 2006    | 2007    | 2008 | 2009 | 2010 | 2011 | 2012    | 2013    | 2014    | 2015    | 2016 | 2017    | 2018 | 2019 | 2020 | 2021 | 2022 | 2023 | 2024 |
|-------------|------|------|---------|---------|------|------|------|------|---------|---------|---------|---------|------|---------|------|------|------|------|------|------|------|
| shape_class | U    |      | neither | neither | U    | U    | U    | U    | neither | neither | neither | neither | U    | neither | U    | U    |      | U    | U    |      | U    |
| U_beauty    | 0.10 |      | 0.00    | 0.00    | 0.08 | 0.06 | 0.23 | 0.25 | 0.00    | 0.00    | 0.00    | 0.00    | 0.37 | 0.00    | 0.20 | 0.11 |      | 0.17 | 0.18 |      | 0.02 |
| J_beauty    | 0.00 |      | 0.00    | 0.00    | 0.00 | 0.00 | 0.00 | 0.00 | 0.00    | 0.00    | 0.00    | 0.00    | 0.00 | 0.01    | 0.01 | 0.00 |      | 0.00 | 0.00 |      | 0.02 |
| Dominance   | 0.73 |      |         |         | 0.98 | 1.00 | 1.00 | 0.98 |         |         |         |         | 1.00 | -1.00   | 0.92 | 1.00 |      | 1.00 | 0.97 |      | 0.24 |
| best_df     | 4.29 |      | 5.00    | 3.00    | 4.00 | 5.00 | 5.00 | 5.00 | 5.00    | 3.00    | 5.00    | 4.00    | 4.00 | 4.00    | 4.00 | 5.00 |      | 5.00 | 4.00 |      | 3.00 |
| p_value     | 0.00 |      | 0.00    | 0.08    | 0.00 | 0.00 | 0.00 | 0.00 | 0.00    | 0.00    | 0.00    | 0.00    | 0.00 | 0.00    | 0.00 | 0.00 |      | 0.00 | 0.00 |      | 0.00 |

|                           |       |         |         |       |       |       |       |         |         |         |         |       |         |       |       |       |       |       |
|---------------------------|-------|---------|---------|-------|-------|-------|-------|---------|---------|---------|---------|-------|---------|-------|-------|-------|-------|-------|
| <b>lr_stat</b>            | 38.27 | 38.08   | 12.78   | 52.92 | 47.20 | 29.55 | 57.23 | 31.16   | 27.92   | 43.11   | 31.16   | 31.85 | 52.08   | 48.45 | 27.85 | 47.62 | 29.86 | 41.79 |
| <b>linear_aic</b>         | 40.00 | 29.38   | 30.18   | 44.16 | 34.34 | 46.41 | 48.70 | 25.99   | 27.74   | 44.32   | 31.38   | 40.08 | 58.40   | 52.57 | 29.73 | 43.19 | 40.21 | 53.30 |
| <b>spline_aic</b>         | 18.32 | 9.30    | 31.40   | 7.24  | 5.14  | 34.86 | 9.47  | 12.84   | 13.82   | 19.21   | 16.22   | 24.23 | 22.32   | 20.12 | 19.88 | 13.57 | 26.35 | 25.50 |
| <b>min_age</b>            | 73.29 | 90.50   | 88.43   | 79.97 | 73.02 | 57.60 | 60.61 | 88.80   | 86.17   |         |         | 63.99 | 85.80   | 58.35 | 43.32 | 72.08 | 69.26 | 81.47 |
| <b>min_value</b>          | 4.01  | 3.86    | 3.36    | 3.95  | 3.98  | 3.38  | 4.04  | 1.96    | 3.56    |         |         | 3.99  | 4.12    | 4.30  | 5.25  | 4.54  | 4.72  | 5.21  |
| <b>amplitude</b>          | 3.46  | 2.36    | 3.19    | 3.04  | 2.53  | 3.26  | 4.23  | 3.81    | 2.52    | 4.96    | 3.39    | 2.57  | 5.90    | 4.72  | 1.84  | 2.98  | 2.77  | 4.81  |
| <b>delta_endpoints</b>    | -0.57 | -2.22   | -2.61   | 0.60  | -1.29 | -1.64 | 1.53  | -2.27   | -1.11   | -4.96   | -3.39   | -0.53 | 3.16    | 2.48  | -0.97 | -0.05 | 0.78  | 2.71  |
| <b>n_minima</b>           | 3.06  | 4.00    | 4.00    | 4.00  | 2.00  | 2.00  | 3.00  | 4.00    | 2.00    | 3.00    | 3.00    | 3.00  | 3.00    | 3.00  | 3.00  | 4.00  | 3.00  | 2.00  |
| <b>n_maxima</b>           | 2.47  | 3.00    | 3.00    | 3.00  | 3.00  | 2.00  | 3.00  | 3.00    | 1.00    | 3.00    | 3.00    | 2.00  | 2.00    | 2.00  | 3.00  | 3.00  | 2.00  | 1.00  |
| <b>turning_points</b>     | 5.53  | 7.00    | 7.00    | 7.00  | 5.00  | 4.00  | 6.00  | 7.00    | 3.00    | 6.00    | 6.00    | 5.00  | 5.00    | 5.00  | 6.00  | 7.00  | 5.00  | 3.00  |
| <b>r_trough</b>           | 0.78  | 0.98    | 0.95    | 0.84  | 0.75  | 0.54  | 0.58  | 0.96    | 0.92    | 1.00    | 1.00    | 0.63  | 0.92    | 0.55  | 0.35  | 0.73  | 0.70  | 0.86  |
| <b>interior_indicator</b> | True  | 0.00    | 0.00    | 1.00  | 1.00  | 1.00  | 1.00  | 0.00    | 0.00    | 0.00    | 0.00    | 1.00  | 0.00    | 1.00  | 1.00  | 1.00  | 1.00  | 1.00  |
| <b>trough_indicator</b>   | True  | 1.00    | 1.00    | 1.00  | 1.00  | 1.00  | 1.00  | 1.00    | 1.00    | 0.00    | 0.00    | 1.00  | 1.00    | 1.00  | 1.00  | 1.00  | 1.00  | 1.00  |
| <b>U_D_depth</b>          | 0.45  | 0.06    | 0.18    | 0.80  | 0.40  | 0.44  | 0.58  | 0.40    | 0.56    | 0.00    | 0.00    | 0.79  | 0.46    | 0.47  | 0.41  | 0.94  | 0.72  | 0.44  |
| <b>U_I_interiority</b>    | 0.32  | 0.00    | 0.00    | 0.15  | 0.38  | 0.90  | 0.80  | 0.00    | 0.00    | 0.00    | 0.00    | 0.68  | 0.00    | 0.87  | 0.63  | 0.41  | 0.51  | 0.10  |
| <b>U_M_monotonicity</b>   | 0.70  | 0.81    | 0.82    | 0.82  | 0.72  | 0.81  | 0.75  | 0.84    | 0.87    | 0.00    | 0.00    | 0.80  | 0.74    | 0.77  | 0.76  | 0.67  | 0.73  | 0.93  |
| <b>U_C_convexity</b>      | 0.69  | 0.71    | 0.81    | 0.84  | 0.77  | 1.00  | 0.92  | 0.68    | 0.77    | 0.00    | 0.00    | 1.00  | 0.68    | 0.80  | 0.73  | 0.67  | 0.71  | 0.65  |
| <b>U_S_symmetry</b>       | 0.58  | 0.11    | 0.31    | 0.89  | 0.61  | 0.63  | 0.76  | 0.57    | 0.72    | 0.00    | 0.00    | 0.88  | 0.63    | 0.64  | 0.61  | 0.99  | 0.84  | 0.61  |
| <b>J_R_rise</b>           | 0.14  | 0.00    | 0.00    | 0.20  | 0.00  | 0.00  | 0.36  | 0.00    | 0.00    | 0.00    | 0.00    | 0.00  | 0.54    | 0.53  | 0.00  | 0.00  | 0.28  | 0.56  |
| <b>J_M_monotonicity</b>   | 0.38  | 0.36    | 0.36    | 0.43  | 0.37  | 0.30  | 0.41  | 0.32    | 0.30    | 0.45    | 0.30    | 0.60  | 0.49    | 0.41  | 0.37  | 0.42  | 0.36  | 0.25  |
| <b>J_C_rightconvex</b>    | 0.55  | 0.49    | 0.48    | 0.91  | 0.32  | 0.47  | 0.50  | 0.52    | 0.55    | 0.52    | 0.49    | 0.47  | 0.50    | 0.90  | 0.44  | 0.56  | 0.52  | 0.68  |
| <b>P_turning</b>          | 0.07  | 0.01    | 0.01    | 0.01  | 0.06  | 0.12  | 0.03  | 0.01    | 0.25    | 0.03    | 0.03    | 0.06  | 0.06    | 0.06  | 0.03  | 0.01  | 0.06  | 0.25  |
| <b>final_structure</b>    | U     | neither | neither | U     | U     | U     | U     | neither | neither | neither | neither | U     | neither | U     | U     | U     | U     | U     |
| <b>U_supported</b>        | True  | 0.00    | 0.00    | 1.00  | 1.00  | 1.00  | 1.00  | 0.00    | 0.00    | 0.00    | 0.00    | 1.00  | 0.00    | 1.00  | 1.00  | 1.00  | 1.00  | 1.00  |
| <b>J_supported</b>        | False | 0.00    | 0.00    | 0.00  | 0.00  | 0.00  | 0.00  | 0.00    | 0.00    | 0.00    | 0.00    | 0.00  | 0.00    | 0.00  | 0.00  | 0.00  | 0.00  | 0.00  |

Table S6al. Ecuador Cantril U-shape ratings, 2006-2024

| KPI                    | Mean    | 2005 | 2006 | 2007    | 2008    | 2009 | 2010    | 2011  | 2012 | 2013  | 2014 | 2015 | 2016    | 2017 | 2018  | 2019    | 2020 | 2021 | 2022 | 2023 | 2024  |
|------------------------|---------|------|------|---------|---------|------|---------|-------|------|-------|------|------|---------|------|-------|---------|------|------|------|------|-------|
| <b>shape_class</b>     | neither |      |      | neither | neither |      | neither | U     |      | U     |      |      | neither |      | U     | neither |      |      |      |      | U     |
| <b>U_beauty</b>        | 0.05    |      |      | 0.00    | 0.00    |      | 0.00    | 0.01  |      | 0.09  |      |      | 0.00    |      | 0.22  | 0.00    |      |      |      |      | 0.12  |
| <b>J_beauty</b>        | 0.00    |      |      | 0.00    | 0.00    |      | 0.00    | 0.01  |      | 0.00  |      |      | 0.00    |      | 0.00  | 0.00    |      |      |      |      | 0.00  |
| <b>Dominance</b>       | 0.77    |      |      |         |         |      |         | 0.11  |      | 0.95  |      |      |         |      | 1.00  |         |      |      |      |      | 1.00  |
| <b>best_df</b>         | 4.33    |      |      | 3.00    | 5.00    |      | 5.00    | 3.00  |      | 4.00  |      |      | 5.00    |      | 5.00  | 5.00    |      |      |      |      | 4.00  |
| <b>p_value</b>         | 0.01    |      |      | 0.00    | 0.00    |      | 0.00    | 0.00  |      | 0.00  |      |      | 0.00    |      | 0.02  | 0.08    |      |      |      |      | 0.00  |
| <b>lr_stat</b>         | 31.37   |      |      | 27.61   | 33.39   |      | 34.68   | 27.74 |      | 39.25 |      |      | 61.48   |      | 19.44 | 15.61   |      |      |      |      | 23.09 |
| <b>linear_aic</b>      | 32.55   |      |      | 2.81    | 31.04   |      | 15.23   | 46.83 |      | 35.34 |      |      | 58.22   |      | 46.91 | 29.65   |      |      |      |      | 26.93 |
| <b>spline_aic</b>      | 17.85   |      |      | -10.80  | 15.65   |      | -1.45   | 33.09 |      | 12.08 |      |      | 14.75   |      | 45.47 | 32.04   |      |      |      |      | 19.84 |
| <b>min_age</b>         | 78.97   |      |      |         |         |      | 87.49   | 83.73 |      | 78.84 |      |      |         |      | 62.68 | 89.74   |      |      |      |      | 71.32 |
| <b>min_value</b>       | 4.20    |      |      |         |         |      | 4.49    | 3.64  |      | 4.65  |      |      |         |      | 4.49  | 3.32    |      |      |      |      | 4.60  |
| <b>amplitude</b>       | 3.45    |      |      | 2.76    | 2.92    |      | 2.26    | 3.94  |      | 2.71  |      |      | 7.38    |      | 3.64  | 3.27    |      |      |      |      | 2.20  |
| <b>delta_endpoints</b> | -1.70   |      |      | -2.69   | -2.71   |      | -0.76   | 1.29  |      | 0.38  |      |      | -6.89   |      | -0.50 | -2.61   |      |      |      |      | -0.82 |
| <b>n_minima</b>        | 2.44    |      |      | 1.00    | 3.00    |      | 4.00    | 1.00  |      | 2.00  |      |      | 2.00    |      | 3.00  | 2.00    |      |      |      |      | 4.00  |
| <b>n_maxima</b>        | 2.33    |      |      | 2.00    | 4.00    |      | 3.00    | 0.00  |      | 2.00  |      |      | 3.00    |      | 3.00  | 1.00    |      |      |      |      | 3.00  |
| <b>turning_points</b>  | 4.78    |      |      | 3.00    | 7.00    |      | 7.00    | 1.00  |      | 4.00  |      |      | 5.00    |      | 6.00  | 3.00    |      |      |      |      | 7.00  |

|                           |         |         |         |         |      |      |         |      |         |      |
|---------------------------|---------|---------|---------|---------|------|------|---------|------|---------|------|
| <b>r_trough</b>           | 0.88    | 1.00    | 1.00    | 0.94    | 0.89 | 0.82 | 1.00    | 0.61 | 0.97    | 0.72 |
| <b>interior_indicator</b> | False   | 0.00    | 0.00    | 0.00    | 1.00 | 1.00 | 0.00    | 1.00 | 0.00    | 1.00 |
| <b>trough_indicator</b>   | True    | 0.00    | 0.00    | 1.00    | 1.00 | 1.00 | 0.00    | 1.00 | 1.00    | 1.00 |
| <b>U_D_depth</b>          | 0.39    | 0.00    | 0.00    | 0.66    | 0.67 | 0.73 | 0.00    | 0.60 | 0.20    | 0.63 |
| <b>U_I_interiority</b>    | 0.15    | 0.00    | 0.00    | 0.00    | 0.03 | 0.19 | 0.00    | 0.73 | 0.00    | 0.44 |
| <b>U_M_monotonicity</b>   | 0.56    | 0.00    | 0.00    | 0.82    | 1.00 | 0.84 | 0.00    | 0.74 | 0.93    | 0.69 |
| <b>U_C_convexity</b>      | 0.47    | 0.00    | 0.00    | 0.67    | 0.75 | 0.72 | 0.00    | 0.68 | 0.67    | 0.71 |
| <b>U_S_symmetry</b>       | 0.50    | 0.00    | 0.00    | 0.80    | 0.81 | 0.91 | 0.00    | 0.90 | 0.34    | 0.77 |
| <b>J_R_rise</b>           | 0.05    | 0.00    | 0.00    | 0.00    | 0.33 | 0.14 | 0.00    | 0.00 | 0.00    | 0.00 |
| <b>J_M_monotonicity</b>   | 0.27    | 0.16    | 0.35    | 0.36    | 0.11 | 0.28 | 0.28    | 0.32 | 0.16    | 0.42 |
| <b>J_C_rightconvex</b>    | 0.47    | 0.02    | 0.49    | 0.51    | 0.64 | 0.57 | 0.47    | 0.46 | 0.51    | 0.60 |
| <b>P_turning</b>          | 0.19    | 0.25    | 0.01    | 0.01    | 1.00 | 0.12 | 0.06    | 0.03 | 0.25    | 0.01 |
| <b>final_structure</b>    | neither | neither | neither | neither | U    | U    | neither | U    | neither | U    |
| <b>U_supported</b>        | False   | 0.00    | 0.00    | 0.00    | 1.00 | 1.00 | 0.00    | 1.00 | 0.00    | 1.00 |
| <b>J_supported</b>        | False   | 0.00    | 0.00    | 0.00    | 0.00 | 0.00 | 0.00    | 0.00 | 0.00    | 0.00 |

Table S6am. Egypt Cantril U-shape ratings, 2006-2024

| KPI                       | Mean    | 2005 | 2006 | 2007 | 2008 | 2009 | 2010 | 2011    | 2012 | 2013 | 2014 | 2015 | 2016 | 2017 | 2018 | 2019    | 2020 | 2021 | 2022 | 2023 | 2024 |
|---------------------------|---------|------|------|------|------|------|------|---------|------|------|------|------|------|------|------|---------|------|------|------|------|------|
| <b>shape_class</b>        | neither |      |      |      |      |      |      | neither |      |      |      |      |      |      |      | neither |      |      |      |      |      |
| <b>U_beauty</b>           | 0.00    |      |      |      |      |      |      | 0.00    |      |      |      |      |      |      |      | 0.00    |      |      |      |      |      |
| <b>J_beauty</b>           | 0.00    |      |      |      |      |      |      | 0.00    |      |      |      |      |      |      |      | 0.00    |      |      |      |      |      |
| <b>Dominance</b>          |         |      |      |      |      |      |      |         |      |      |      |      |      |      |      |         |      |      |      |      |      |
| <b>best_df</b>            | 4.50    |      |      |      |      |      |      | 4.00    |      |      |      |      |      |      |      | 5.00    |      |      |      |      |      |
| <b>p_value</b>            | 0.00    |      |      |      |      |      |      | 0.00    |      |      |      |      |      |      |      | 0.00    |      |      |      |      |      |
| <b>lr_stat</b>            | 59.95   |      |      |      |      |      |      | 65.86   |      |      |      |      |      |      |      | 54.04   |      |      |      |      |      |
| <b>linear_aic</b>         | 26.93   |      |      |      |      |      |      | 7.39    |      |      |      |      |      |      |      | 46.46   |      |      |      |      |      |
| <b>spline_aic</b>         | -16.02  |      |      |      |      |      |      | -42.47  |      |      |      |      |      |      |      | 10.42   |      |      |      |      |      |
| <b>min_age</b>            |         |      |      |      |      |      |      |         |      |      |      |      |      |      |      |         |      |      |      |      |      |
| <b>min_value</b>          |         |      |      |      |      |      |      |         |      |      |      |      |      |      |      |         |      |      |      |      |      |
| <b>amplitude</b>          | 3.01    |      |      |      |      |      |      | 1.12    |      |      |      |      |      |      |      | 4.90    |      |      |      |      |      |
| <b>delta_endpoints</b>    | -2.31   |      |      |      |      |      |      | -1.00   |      |      |      |      |      |      |      | -3.63   |      |      |      |      |      |
| <b>n_minima</b>           | 3.50    |      |      |      |      |      |      | 3.00    |      |      |      |      |      |      |      | 4.00    |      |      |      |      |      |
| <b>n_maxima</b>           | 3.50    |      |      |      |      |      |      | 3.00    |      |      |      |      |      |      |      | 4.00    |      |      |      |      |      |
| <b>turning_points</b>     | 7.00    |      |      |      |      |      |      | 6.00    |      |      |      |      |      |      |      | 8.00    |      |      |      |      |      |
| <b>r_trough</b>           | 1.00    |      |      |      |      |      |      | 1.00    |      |      |      |      |      |      |      | 1.00    |      |      |      |      |      |
| <b>interior_indicator</b> | False   |      |      |      |      |      |      | 0.00    |      |      |      |      |      |      |      | 0.00    |      |      |      |      |      |
| <b>trough_indicator</b>   | False   |      |      |      |      |      |      | 0.00    |      |      |      |      |      |      |      | 0.00    |      |      |      |      |      |
| <b>U_D_depth</b>          | 0.00    |      |      |      |      |      |      | 0.00    |      |      |      |      |      |      |      | 0.00    |      |      |      |      |      |
| <b>U_I_interiority</b>    | 0.00    |      |      |      |      |      |      | 0.00    |      |      |      |      |      |      |      | 0.00    |      |      |      |      |      |
| <b>U_M_monotonicity</b>   | 0.00    |      |      |      |      |      |      | 0.00    |      |      |      |      |      |      |      | 0.00    |      |      |      |      |      |
| <b>U_C_convexity</b>      | 0.00    |      |      |      |      |      |      | 0.00    |      |      |      |      |      |      |      | 0.00    |      |      |      |      |      |
| <b>U_S_symmetry</b>       | 0.00    |      |      |      |      |      |      | 0.00    |      |      |      |      |      |      |      | 0.00    |      |      |      |      |      |
| <b>J_R_rise</b>           | 0.00    |      |      |      |      |      |      | 0.00    |      |      |      |      |      |      |      | 0.00    |      |      |      |      |      |
| <b>J_M_monotonicity</b>   | 0.45    |      |      |      |      |      |      | 0.41    |      |      |      |      |      |      |      | 0.49    |      |      |      |      |      |

|                        |         |  |         |  |         |
|------------------------|---------|--|---------|--|---------|
| <b>J_C_rightconvex</b> | 0.51    |  | 0.54    |  | 0.47    |
| <b>P_turning</b>       | 0.02    |  | 0.03    |  | 0.01    |
| <b>final_structure</b> | neither |  | neither |  | neither |
| <b>U_supported</b>     | False   |  | 0.00    |  | 0.00    |
| <b>J_supported</b>     | False   |  | 0.00    |  | 0.00    |

Table S6an. El Salvador Cantril U-shape ratings, 2006-2024

| KPI                       | Mean    | 2005 | 2006  | 2007  | 2008 | 2009    | 2010  | 2011    | 2012 | 2013 | 2014 | 2015 | 2016  | 2017    | 2018  | 2019    | 2020 | 2021    | 2022    | 2023    | 2024    |
|---------------------------|---------|------|-------|-------|------|---------|-------|---------|------|------|------|------|-------|---------|-------|---------|------|---------|---------|---------|---------|
| <b>shape_class</b>        | neither |      | U     | U     |      | neither | U     | neither |      |      |      |      | U     | neither | U     | neither |      | neither | neither | neither | neither |
| <b>U_beauty</b>           | 0.04    |      | 0.13  | 0.01  |      | 0.00    | 0.09  | 0.00    |      |      |      |      | 0.22  | 0.00    | 0.02  | 0.00    |      | 0.00    | 0.00    | 0.00    | 0.00    |
| <b>J_beauty</b>           | 0.00    |      | 0.00  | 0.00  |      | 0.02    | 0.00  | 0.00    |      |      |      |      | 0.00  | 0.00    | 0.00  | 0.00    |      | 0.00    | 0.00    | 0.00    | 0.00    |
| <b>Dominance</b>          | 0.42    |      | 1.00  | 1.00  |      | -1.00   | 0.97  | -1.00   |      |      |      |      | 1.00  |         | 1.00  |         |      |         |         |         |         |
| <b>best_df</b>            | 4.15    |      | 3.00  | 4.00  |      | 3.00    | 5.00  | 4.00    |      |      |      |      | 4.00  | 5.00    | 5.00  | 3.00    |      | 5.00    | 3.00    | 5.00    | 5.00    |
| <b>p_value</b>            | 0.00    |      | 0.00  | 0.00  |      | 0.00    | 0.00  | 0.00    |      |      |      |      | 0.00  | 0.00    | 0.00  | 0.00    |      | 0.00    | 0.00    | 0.00    | 0.00    |
| <b>lr_stat</b>            | 35.27   |      | 24.62 | 35.95 |      | 59.47   | 23.99 | 41.27   |      |      |      |      | 32.57 | 34.75   | 41.49 | 22.17   |      | 35.61   | 26.25   | 35.46   | 44.95   |
| <b>linear_aic</b>         | 32.21   |      | 20.02 | 26.76 |      | 51.44   | 25.86 | 40.26   |      |      |      |      | 29.38 | 32.47   | 33.82 | 32.50   |      | 36.12   | 22.64   | 31.88   | 35.58   |
| <b>spline_aic</b>         | 13.24   |      | 9.40  | 6.81  |      | 5.97    | 19.86 | 14.98   |      |      |      |      | 12.81 | 15.72   | 10.33 | 24.33   |      | 18.50   | 10.39   | 14.42   | 8.63    |
| <b>min_age</b>            | 79.32   |      | 76.40 | 78.84 |      | 84.67   | 73.20 | 86.17   |      |      |      |      | 57.23 | 88.99   | 78.84 |         |      | 89.56   |         |         |         |
| <b>min_value</b>          | 4.45    |      | 4.85  | 3.44  |      | 4.61    | 6.20  | 2.49    |      |      |      |      | 5.07  | 4.31    | 5.13  |         |      | 3.92    |         |         |         |
| <b>amplitude</b>          | 2.77    |      | 1.40  | 2.83  |      | 5.38    | 1.80  | 3.53    |      |      |      |      | 2.13  | 2.78    | 2.45  | 2.71    |      | 3.78    | 2.51    | 2.10    | 2.66    |
| <b>delta_endpoints</b>    | -1.09   |      | -0.20 | -2.25 |      | 2.73    | 0.65  | 0.54    |      |      |      |      | -1.17 | -1.10   | -1.05 | -2.71   |      | -2.71   | -2.51   | -1.69   | -2.66   |
| <b>n_minima</b>           | 2.92    |      | 3.00  | 3.00  |      | 2.00    | 4.00  | 4.00    |      |      |      |      | 2.00  | 4.00    | 4.00  | 2.00    |      | 4.00    | 2.00    | 2.00    | 2.00    |
| <b>n_maxima</b>           | 2.69    |      | 3.00  | 3.00  |      | 1.00    | 3.00  | 3.00    |      |      |      |      | 3.00  | 3.00    | 4.00  | 2.00    |      | 3.00    | 2.00    | 3.00    | 2.00    |
| <b>turning_points</b>     | 5.62    |      | 6.00  | 6.00  |      | 3.00    | 7.00  | 7.00    |      |      |      |      | 5.00  | 7.00    | 8.00  | 4.00    |      | 7.00    | 4.00    | 5.00    | 4.00    |
| <b>r_trough</b>           | 0.88    |      | 0.79  | 0.82  |      | 0.90    | 0.75  | 0.92    |      |      |      |      | 0.54  | 0.96    | 0.82  | 1.00    |      | 0.97    | 1.00    | 1.00    | 1.00    |
| <b>interior_indicator</b> | False   |      | 1.00  | 1.00  |      | 0.00    | 1.00  | 0.00    |      |      |      |      | 1.00  | 0.00    | 1.00  | 0.00    |      | 0.00    | 0.00    | 0.00    | 0.00    |
| <b>trough_indicator</b>   | True    |      | 1.00  | 1.00  |      | 1.00    | 1.00  | 1.00    |      |      |      |      | 1.00  | 1.00    | 1.00  | 0.00    |      | 1.00    | 0.00    | 0.00    | 0.00    |
| <b>U_D_depth</b>          | 0.36    |      | 0.83  | 0.20  |      | 0.49    | 0.64  | 0.85    |      |      |      |      | 0.45  | 0.60    | 0.35  | 0.00    |      | 0.28    | 0.00    | 0.00    | 0.00    |
| <b>U_I_interiority</b>    | 0.15    |      | 0.27  | 0.19  |      | 0.00    | 0.38  | 0.00    |      |      |      |      | 0.91  | 0.00    | 0.19  | 0.00    |      | 0.00    | 0.00    | 0.00    | 0.00    |
| <b>U_M_monotonicity</b>   | 0.55    |      | 0.75  | 0.72  |      | 0.88    | 0.69  | 0.86    |      |      |      |      | 0.83  | 0.87    | 0.70  | 0.00    |      | 0.85    | 0.00    | 0.00    | 0.00    |
| <b>U_C_convexity</b>      | 0.50    |      | 0.86  | 0.68  |      | 0.80    | 0.61  | 0.70    |      |      |      |      | 0.87  | 0.66    | 0.62  | 0.00    |      | 0.68    | 0.00    | 0.00    | 0.00    |
| <b>U_S_symmetry</b>       | 0.47    |      | 0.92  | 0.34  |      | 0.66    | 0.78  | 0.92    |      |      |      |      | 0.62  | 0.75    | 0.62  | 0.00    |      | 0.44    | 0.00    | 0.00    | 0.00    |
| <b>J_R_rise</b>           | 0.08    |      | 0.00  | 0.00  |      | 0.51    | 0.36  | 0.15    |      |      |      |      | 0.00  | 0.00    | 0.00  | 0.00    |      | 0.00    | 0.00    | 0.00    | 0.00    |
| <b>J_M_monotonicity</b>   | 0.36    |      | 0.42  | 0.34  |      | 0.30    | 0.42  | 0.32    |      |      |      |      | 0.34  | 0.28    | 0.41  | 0.32    |      | 0.31    | 0.45    | 0.38    | 0.36    |
| <b>J_C_rightconvex</b>    | 0.44    |      | 0.54  | 0.54  |      | 0.63    | 0.61  | 0.50    |      |      |      |      | 0.55  | 0.53    | 0.49  | 0.46    |      | 0.50    | 0.00    | 0.22    | 0.21    |
| <b>P_turning</b>          | 0.07    |      | 0.03  | 0.03  |      | 0.25    | 0.01  | 0.01    |      |      |      |      | 0.06  | 0.01    | 0.01  | 0.12    |      | 0.01    | 0.12    | 0.06    | 0.12    |
| <b>final_structure</b>    | neither |      | U     | U     |      | neither | U     | neither |      |      |      |      | U     | neither | U     | neither |      | neither | neither | neither | neither |
| <b>U_supported</b>        | False   |      | 1.00  | 1.00  |      | 0.00    | 1.00  | 0.00    |      |      |      |      | 1.00  | 0.00    | 1.00  | 0.00    |      | 0.00    | 0.00    | 0.00    | 0.00    |
| <b>J_supported</b>        | False   |      | 0.00  | 0.00  |      | 0.00    | 0.00  | 0.00    |      |      |      |      | 0.00  | 0.00    | 0.00  | 0.00    |      | 0.00    | 0.00    | 0.00    | 0.00    |

Table S6ao. Estonia Cantril U-shape ratings, 2006-2024

| KPI                | Mean  | 2005 | 2006  | 2007 | 2008    | 2009 | 2010 | 2011  | 2012  | 2013  | 2014  | 2015  | 2016   | 2017    | 2018  | 2019    | 2020 | 2021  | 2022 | 2023  | 2024    |
|--------------------|-------|------|-------|------|---------|------|------|-------|-------|-------|-------|-------|--------|---------|-------|---------|------|-------|------|-------|---------|
| shape_class        | U     |      | U     |      | neither |      |      | U     | U     | U     | U     | U     | U      | neither | U     | neither |      | U     |      | U     | neither |
| U_beauty           | 0.08  |      | 0.01  |      | 0.00    |      |      | 0.03  | 0.27  | 0.27  | 0.18  | 0.06  | 0.04   | 0.00    | 0.22  | 0.00    |      | 0.01  |      | 0.04  | 0.00    |
| J_beauty           | 0.00  |      | 0.01  |      | 0.00    |      |      | 0.00  | 0.00  | 0.01  | 0.00  | 0.00  | 0.01   | 0.00    | 0.00  | 0.00    |      | 0.00  |      | 0.00  | 0.00    |
| Dominance          | 0.79  |      | 0.15  |      | 1.00    |      |      | 1.00  | 1.00  | 0.96  | 0.99  | 1.00  | 0.75   |         | 1.00  |         |      | 0.20  |      | 0.84  |         |
| best_df            | 4.57  |      | 5.00  |      | 4.00    |      |      | 5.00  | 4.00  | 5.00  | 5.00  | 5.00  | 5.00   | 4.00    | 5.00  | 5.00    |      | 3.00  |      | 4.00  | 5.00    |
| p_value            | 0.00  |      | 0.00  |      | 0.00    |      |      | 0.00  | 0.00  | 0.00  | 0.00  | 0.00  | 0.00   | 0.00    | 0.00  | 0.01    |      | 0.01  |      | 0.00  | 0.00    |
| lr_stat            | 45.07 |      | 75.31 |      | 32.73   |      |      | 32.09 | 45.13 | 59.06 | 40.63 | 50.12 | 63.99  | 32.07   | 32.05 | 22.98   |      | 18.21 |      | 57.38 | 69.30   |
| linear_aic         | 24.97 |      | 47.46 |      | 0.96    |      |      | 17.50 | 25.63 | 35.39 | 15.54 | 30.79 | 33.41  | 25.49   | 23.52 | 1.98    |      | 33.55 |      | 38.22 | 20.19   |
| spline_aic         | -2.96 |      | -9.84 |      | -15.77  |      |      | 3.41  | -3.50 | -5.67 | -7.09 | -1.34 | -12.57 | 9.42    | 9.46  | -3.00   |      | 29.35 |      | -3.16 | -31.11  |
| min_age            | 78.00 |      | 81.29 |      | 88.99   |      |      | 73.95 | 69.26 | 68.50 | 73.20 | 80.91 | 80.72  |         | 71.51 | 87.49   |      | 83.92 |      | 76.21 |         |
| min_value          | 4.83  |      | 4.73  |      | 3.55    |      |      | 4.51  | 4.39  | 4.46  | 4.94  | 4.68  | 4.65   |         | 5.26  | 5.24    |      | 5.51  |      | 6.06  |         |
| amplitude          | 2.50  |      | 4.27  |      | 2.60    |      |      | 2.37  | 2.04  | 2.54  | 1.18  | 2.40  | 2.56   | 3.78    | 1.60  | 1.58    |      | 2.41  |      | 2.93  | 2.69    |
| delta_endpoints    | -0.28 |      | 3.11  |      | -2.16   |      |      | -1.88 | -0.42 | 0.61  | 0.16  | -0.41 | 1.15   | -3.78   | -0.01 | -0.48   |      | 1.05  |      | 1.89  | -2.69   |
| n_minima           | 3.07  |      | 3.00  |      | 2.00    |      |      | 2.00  | 2.00  | 3.00  | 4.00  | 4.00  | 3.00   | 3.00    | 4.00  | 3.00    |      | 3.00  |      | 4.00  | 3.00    |
| n_maxima           | 2.36  |      | 2.00  |      | 1.00    |      |      | 2.00  | 1.00  | 2.00  | 3.00  | 3.00  | 2.00   | 3.00    | 3.00  | 3.00    |      | 2.00  |      | 3.00  | 3.00    |
| turning_points     | 5.43  |      | 5.00  |      | 3.00    |      |      | 4.00  | 3.00  | 5.00  | 7.00  | 7.00  | 5.00   | 6.00    | 7.00  | 6.00    |      | 5.00  |      | 7.00  | 6.00    |
| r_trough           | 0.84  |      | 0.86  |      | 0.96    |      |      | 0.76  | 0.70  | 0.69  | 0.75  | 0.85  | 0.85   | 1.00    | 0.73  | 0.94    |      | 0.89  |      | 0.79  | 1.00    |
| interior_indicator | True  |      | 1.00  |      | 0.00    |      |      | 1.00  | 1.00  | 1.00  | 1.00  | 1.00  | 1.00   | 0.00    | 1.00  | 0.00    |      | 1.00  |      | 1.00  | 0.00    |
| trough_indicator   | True  |      | 1.00  |      | 1.00    |      |      | 1.00  | 1.00  | 1.00  | 1.00  | 1.00  | 1.00   | 0.00    | 1.00  | 1.00    |      | 1.00  |      | 1.00  | 0.00    |
| U_D_depth          | 0.47  |      | 0.27  |      | 0.17    |      |      | 0.21  | 0.79  | 0.76  | 0.77  | 0.83  | 0.55   | 0.00    | 0.99  | 0.27    |      | 0.56  |      | 0.36  | 0.00    |
| U_I_interiority    | 0.20  |      | 0.11  |      | 0.00    |      |      | 0.35  | 0.51  | 0.53  | 0.38  | 0.12  | 0.13   | 0.00    | 0.43  | 0.00    |      | 0.02  |      | 0.28  | 0.00    |
| U_M_monotonicity   | 0.71  |      | 0.85  |      | 0.93    |      |      | 0.80  | 0.85  | 0.84  | 0.79  | 0.81  | 0.86   | 0.00    | 0.73  | 0.83    |      | 0.87  |      | 0.75  | 0.00    |
| U_C_convexity      | 0.67  |      | 0.81  |      | 0.75    |      |      | 0.80  | 0.81  | 0.85  | 0.81  | 0.85  | 0.78   | 0.00    | 0.70  | 0.67    |      | 0.77  |      | 0.73  | 0.00    |
| U_S_symmetry       | 0.59  |      | 0.43  |      | 0.29    |      |      | 0.35  | 0.88  | 0.86  | 0.92  | 0.91  | 0.71   | 0.00    | 1.00  | 0.64    |      | 0.72  |      | 0.53  | 0.00    |
| J_R_rise           | 0.19  |      | 0.73  |      | 0.00    |      |      | 0.00  | 0.00  | 0.24  | 0.14  | 0.00  | 0.45   | 0.00    | 0.00  | 0.00    |      | 0.44  |      | 0.64  | 0.00    |
| J_M_monotonicity   | 0.38  |      | 0.38  |      | 0.17    |      |      | 0.30  | 0.22  | 0.52  | 0.53  | 0.44  | 0.37   | 0.32    | 0.38  | 0.35    |      | 0.33  |      | 0.56  | 0.50    |
| J_C_rightconvex    | 0.64  |      | 0.82  |      | 0.43    |      |      | 0.37  | 0.55  | 0.93  | 0.97  | 0.87  | 0.83   | 0.47    | 0.58  | 0.43    |      | 0.65  |      | 0.66  | 0.34    |
| P_turning          | 0.07  |      | 0.06  |      | 0.25    |      |      | 0.12  | 0.25  | 0.06  | 0.01  | 0.01  | 0.06   | 0.03    | 0.01  | 0.03    |      | 0.06  |      | 0.01  | 0.03    |
| final_structure    | U     |      | U     |      | neither |      |      | U     | U     | U     | U     | U     | U      | neither | U     | neither |      | U     |      | U     | neither |
| U_supported        | True  |      | 1.00  |      | 0.00    |      |      | 1.00  | 1.00  | 1.00  | 1.00  | 1.00  | 1.00   | 0.00    | 1.00  | 0.00    |      | 1.00  |      | 1.00  | 0.00    |
| J_supported        | False |      | 0.00  |      | 0.00    |      |      | 0.00  | 0.00  | 0.00  | 0.00  | 0.00  | 0.00   | 0.00    | 0.00  | 0.00    |      | 0.00  |      | 0.00  | 0.00    |

Table S6ap. Eswatini Cantril U-shape ratings, 2006-2024

| KPI         | Mean    | 2005    | 2006    | 2007    | 2008    | 2009    | 2010    | 2011    | 2012    | 2013    | 2014    | 2015    | 2016    | 2017    | 2018    | 2019    | 2020    | 2021    | 2022    | 2023    | 2024    |
|-------------|---------|---------|---------|---------|---------|---------|---------|---------|---------|---------|---------|---------|---------|---------|---------|---------|---------|---------|---------|---------|---------|
| shape_class | Mean    | 2005.00 | 2006.00 | 2007.00 | 2008.00 | 2009.00 | 2010.00 | 2011.00 | 2012.00 | 2013.00 | 2014.00 | 2015.00 | 2016.00 | 2017.00 | 2018.00 | 2019.00 | 2020.00 | 2021.00 | 2022.00 | 2023.00 | 2024.00 |
| U_beauty    | neither |         |         |         |         |         |         |         |         |         |         |         |         |         | neither | neither |         |         | neither |         |         |
| J_beauty    | 0.00    |         |         |         |         |         |         |         |         |         |         |         |         |         | 0.00    | 0.00    |         |         | 0.00    |         |         |
| Dominance   | 0.00    |         |         |         |         |         |         |         |         |         |         |         |         |         | 0.00    | 0.00    |         |         | 0.00    |         |         |
| best_df     | -1.00   |         |         |         |         |         |         |         |         |         |         |         |         |         |         | -1.00   |         |         |         |         |         |
| p_value     | 4.50    |         |         |         |         |         |         |         |         |         |         |         |         |         | 4.00    | 4.00    |         |         | 5.00    |         |         |

|                    |         |  |  |  |  |  |  |  |  |  |  |  |  |  |         |         |  |  |  |         |
|--------------------|---------|--|--|--|--|--|--|--|--|--|--|--|--|--|---------|---------|--|--|--|---------|
| lr_stat            | 0.00    |  |  |  |  |  |  |  |  |  |  |  |  |  | 0.00    | 0.00    |  |  |  | 0.00    |
| linear_aic         | 51.26   |  |  |  |  |  |  |  |  |  |  |  |  |  | 30.42   | 56.99   |  |  |  | 46.83   |
| spline_aic         | 37.57   |  |  |  |  |  |  |  |  |  |  |  |  |  | 26.88   | 44.26   |  |  |  | 24.69   |
| min_age            | 3.31    |  |  |  |  |  |  |  |  |  |  |  |  |  | 12.47   | 3.26    |  |  |  | -4.14   |
| min_value          | 87.21   |  |  |  |  |  |  |  |  |  |  |  |  |  |         | 84.86   |  |  |  |         |
| amplitude          | 1.35    |  |  |  |  |  |  |  |  |  |  |  |  |  |         | 3.28    |  |  |  |         |
| delta_endpoints    | 3.76    |  |  |  |  |  |  |  |  |  |  |  |  |  | 2.86    | 3.72    |  |  |  | 2.35    |
| n_minima           | -1.85   |  |  |  |  |  |  |  |  |  |  |  |  |  | -2.86   | 1.76    |  |  |  | -2.18   |
| n_maxima           | 3.00    |  |  |  |  |  |  |  |  |  |  |  |  |  | 2.00    | 4.00    |  |  |  | 3.00    |
| turning_points     | 3.00    |  |  |  |  |  |  |  |  |  |  |  |  |  | 2.00    | 4.00    |  |  |  | 3.00    |
| r_trough           | 6.00    |  |  |  |  |  |  |  |  |  |  |  |  |  | 4.00    | 8.00    |  |  |  | 6.00    |
| interior_indicator | 0.97    |  |  |  |  |  |  |  |  |  |  |  |  |  | 1.00    | 0.90    |  |  |  | 1.00    |
| trough_indicator   | False   |  |  |  |  |  |  |  |  |  |  |  |  |  | 0.00    | 0.00    |  |  |  | 0.00    |
| U_D_depth          | False   |  |  |  |  |  |  |  |  |  |  |  |  |  | 0.00    | 1.00    |  |  |  | 0.00    |
| U_I_interiority    | 0.18    |  |  |  |  |  |  |  |  |  |  |  |  |  | 0.00    | 0.53    |  |  |  | 0.00    |
| U_M_monotonicity   | 0.00    |  |  |  |  |  |  |  |  |  |  |  |  |  | 0.00    | 0.00    |  |  |  | 0.00    |
| U_C_convexity      | 0.40    |  |  |  |  |  |  |  |  |  |  |  |  |  | 0.00    | 0.81    |  |  |  | 0.00    |
| U_S_symmetry       | 0.35    |  |  |  |  |  |  |  |  |  |  |  |  |  | 0.00    | 0.67    |  |  |  | 0.00    |
| J_R_rise           | 0.27    |  |  |  |  |  |  |  |  |  |  |  |  |  | 0.00    | 0.69    |  |  |  | 0.00    |
| J_M_monotonicity   | 0.12    |  |  |  |  |  |  |  |  |  |  |  |  |  | 0.00    | 0.47    |  |  |  | 0.00    |
| J_C_rightconvex    | 0.33    |  |  |  |  |  |  |  |  |  |  |  |  |  | 0.26    | 0.41    |  |  |  | 0.27    |
| P_turning          | 0.49    |  |  |  |  |  |  |  |  |  |  |  |  |  | 0.46    | 0.59    |  |  |  | 0.52    |
| final_structure    | 0.05    |  |  |  |  |  |  |  |  |  |  |  |  |  | 0.12    | 0.01    |  |  |  | 0.03    |
| U_supported        | neither |  |  |  |  |  |  |  |  |  |  |  |  |  | neither | neither |  |  |  | neither |
| J_supported        | False   |  |  |  |  |  |  |  |  |  |  |  |  |  | 0.00    | 0.00    |  |  |  | 0.00    |

Table S6aq. Ethiopia Cantril U-shape ratings, 2006-2024

| KPI             | Mean  | 2005    | 2006    | 2007    | 2008    | 2009    | 2010    | 2011    | 2012    | 2013    | 2014    | 2015    | 2016    | 2017    | 2018    | 2019    | 2020    | 2021    | 2022    | 2023    | 2024    |         |
|-----------------|-------|---------|---------|---------|---------|---------|---------|---------|---------|---------|---------|---------|---------|---------|---------|---------|---------|---------|---------|---------|---------|---------|
| shape_class     | Mean  | 2005.00 | 2006.00 | 2007.00 | 2008.00 | 2009.00 | 2010.00 | 2011.00 | 2012.00 | 2013.00 | 2014.00 | 2015.00 | 2016.00 | 2017.00 | 2018.00 | 2019.00 | 2020.00 | 2021.00 | 2022.00 | 2023.00 | 2024.00 |         |
| U_beauty        | U     |         |         |         |         |         |         |         |         |         | U       |         |         |         |         | U       |         |         |         |         |         | neither |
| J_beauty        | 0.02  |         |         |         |         |         |         |         |         |         | 0.02    |         |         |         |         | 0.02    |         |         |         |         |         | 0.00    |
| Dominance       | 0.00  |         |         |         |         |         |         |         |         |         | 0.00    |         |         |         |         | 0.00    |         |         |         |         |         | 0.00    |
| best_df         | 0.99  |         |         |         |         |         |         |         |         |         | 0.99    |         |         |         |         | 1.00    |         |         |         |         |         |         |
| p_value         | 4.67  |         |         |         |         |         |         |         |         |         | 5.00    |         |         |         |         | 4.00    |         |         |         |         |         | 5.00    |
| lr_stat         | 0.00  |         |         |         |         |         |         |         |         |         | 0.00    |         |         |         |         | 0.00    |         |         |         |         |         | 0.01    |
| linear_aic      | 52.11 |         |         |         |         |         |         |         |         |         | 94.61   |         |         |         |         | 38.77   |         |         |         |         |         | 22.96   |
| spline_aic      | 30.29 |         |         |         |         |         |         |         |         |         | 33.54   |         |         |         |         | 24.41   |         |         |         |         |         | 32.90   |
| min_age         | -4.49 |         |         |         |         |         |         |         |         |         | -43.06  |         |         |         |         | 1.65    |         |         |         |         |         | 27.94   |
| min_value       | 82.66 |         |         |         |         |         |         |         |         |         | 79.59   |         |         |         |         | 78.84   |         |         |         |         |         | 89.56   |
| amplitude       | 2.48  |         |         |         |         |         |         |         |         |         | 3.33    |         |         |         |         | 2.73    |         |         |         |         |         | 1.39    |
| delta_endpoints | 3.04  |         |         |         |         |         |         |         |         |         | 3.65    |         |         |         |         | 2.34    |         |         |         |         |         | 3.13    |
| n_minima        | -1.06 |         |         |         |         |         |         |         |         |         | 0.28    |         |         |         |         | -0.95   |         |         |         |         |         | -2.50   |
| n_maxima        | 4.00  |         |         |         |         |         |         |         |         |         | 4.00    |         |         |         |         | 4.00    |         |         |         |         |         | 4.00    |
| turning_points  | 4.00  |         |         |         |         |         |         |         |         |         | 4.00    |         |         |         |         | 4.00    |         |         |         |         |         | 4.00    |

|                           |      |      |      |         |
|---------------------------|------|------|------|---------|
| <b>r_trough</b>           | 8.00 | 8.00 | 8.00 | 8.00    |
| <b>interior_indicator</b> | 0.88 | 0.83 | 0.82 | 0.97    |
| <b>trough_indicator</b>   | True | 1.00 | 1.00 | 0.00    |
| <b>U_D_depth</b>          | True | 1.00 | 1.00 | 1.00    |
| <b>U_I_interiority</b>    | 0.30 | 0.38 | 0.33 | 0.20    |
| <b>U_M_monotonicity</b>   | 0.12 | 0.16 | 0.19 | 0.00    |
| <b>U_C_convexity</b>      | 0.70 | 0.64 | 0.68 | 0.79    |
| <b>U_S_symmetry</b>       | 0.67 | 0.63 | 0.68 | 0.68    |
| <b>J_R_rise</b>           | 0.62 | 0.91 | 0.62 | 0.33    |
| <b>J_M_monotonicity</b>   | 0.03 | 0.08 | 0.00 | 0.00    |
| <b>J_C_rightconvex</b>    | 0.44 | 0.50 | 0.41 | 0.40    |
| <b>P_turning</b>          | 0.53 | 0.50 | 0.54 | 0.54    |
| <b>final_structure</b>    | 0.01 | 0.01 | 0.01 | 0.01    |
| <b>U_supported</b>        | U    | U    | U    | neither |
| <b>J_supported</b>        | True | 1.00 | 1.00 | 0.00    |

Table S6ar. Finland Cantril U-shape ratings, 2006-2024

| KPI                       | Mean    | 2005 | 2006 | 2007 | 2008    | 2009 | 2010    | 2011 | 2012   | 2013 | 2014    | 2015    | 2016  | 2017    | 2018    | 2019    | 2020    | 2021 | 2022    | 2023 | 2024    |
|---------------------------|---------|------|------|------|---------|------|---------|------|--------|------|---------|---------|-------|---------|---------|---------|---------|------|---------|------|---------|
| <b>shape_class</b>        | neither |      |      |      | neither |      | neither |      | U      |      | neither | neither | U     | neither | neither | neither | neither |      | neither |      | neither |
| <b>U_beauty</b>           | 0.00    |      |      |      | 0.00    |      | 0.00    |      | 0.01   |      | 0.00    | 0.00    | 0.02  | 0.00    | 0.00    | 0.00    | 0.00    |      | 0.00    |      | 0.00    |
| <b>J_beauty</b>           | 0.00    |      |      |      | 0.00    |      | 0.02    |      | 0.00   |      | 0.00    | 0.00    | 0.00  | 0.00    | 0.00    | 0.00    | 0.00    |      | 0.00    |      | 0.00    |
| <b>Dominance</b>          | 0.00    |      |      |      |         |      | -1.00   |      | 1.00   |      |         |         | 1.00  |         |         |         |         |      | -1.00   |      |         |
| <b>best_df</b>            | 4.33    |      |      |      | 5.00    |      | 3.00    |      | 5.00   |      | 3.00    | 5.00    | 3.00  | 5.00    | 5.00    | 5.00    | 4.00    |      | 4.00    |      | 5.00    |
| <b>p_value</b>            | 0.01    |      |      |      | 0.00    |      | 0.00    |      | 0.00   |      | 0.10    | 0.00    | 0.00  | 0.00    | 0.00    | 0.00    | 0.00    |      | 0.00    |      | 0.00    |
| <b>lr_stat</b>            | 49.40   |      |      |      | 32.37   |      | 54.44   |      | 51.70  |      | 11.97   | 42.10   | 22.98 | 92.85   | 44.98   | 53.60   | 88.87   |      | 51.43   |      | 45.48   |
| <b>linear_aic</b>         | 14.53   |      |      |      | 5.32    |      | 19.62   |      | 6.51   |      | -13.40  | 8.99    | 10.84 | 55.98   | -1.10   | 22.97   | 45.89   |      | 5.21    |      | 7.53    |
| <b>spline_aic</b>         | -18.20  |      |      |      | -9.05   |      | -20.82  |      | -27.19 |      | -11.37  | -15.11  | 1.86  | -18.87  | -28.09  | -12.63  | -26.99  |      | -30.22  |      | -19.95  |
| <b>min_age</b>            | 79.13   |      |      |      | 87.11   |      | 85.61   |      | 82.79  |      | 87.11   | 88.43   | 83.17 |         | 86.55   |         |         |      | 22.45   |      | 88.99   |
| <b>min_value</b>          | 6.81    |      |      |      | 6.65    |      | 6.23    |      | 6.21   |      | 6.91    | 6.30    | 6.97  |         | 7.44    |         |         |      | 7.23    |      | 7.34    |
| <b>amplitude</b>          | 2.03    |      |      |      | 1.30    |      | 1.77    |      | 1.93   |      | 0.80    | 1.71    | 1.36  | 6.15    | 1.26    | 2.04    | 4.22    |      | 1.00    |      | 0.89    |
| <b>delta_endpoints</b>    | -1.32   |      |      |      | -0.29   |      | 0.72    |      | -1.04  |      | -0.72   | -0.80   | -0.31 | -6.00   | -0.70   | -2.00   | -4.11   |      | 0.12    |      | -0.73   |
| <b>n_minima</b>           | 3.00    |      |      |      | 3.00    |      | 1.00    |      | 3.00   |      | 3.00    | 5.00    | 3.00  | 4.00    | 2.00    | 3.00    | 2.00    |      | 3.00    |      | 4.00    |
| <b>n_maxima</b>           | 2.50    |      |      |      | 2.00    |      | 1.00    |      | 3.00   |      | 2.00    | 4.00    | 2.00  | 4.00    | 1.00    | 3.00    | 2.00    |      | 3.00    |      | 3.00    |
| <b>turning_points</b>     | 5.50    |      |      |      | 5.00    |      | 2.00    |      | 6.00   |      | 5.00    | 9.00    | 5.00  | 8.00    | 3.00    | 6.00    | 4.00    |      | 6.00    |      | 7.00    |
| <b>r_trough</b>           | 0.87    |      |      |      | 0.93    |      | 0.91    |      | 0.88   |      | 0.93    | 0.95    | 0.88  | 1.00    | 0.93    | 1.00    | 1.00    |      | 0.07    |      | 0.96    |
| <b>interior_indicator</b> | False   |      |      |      | 0.00    |      | 0.00    |      | 1.00   |      | 0.00    | 0.00    | 1.00  | 0.00    | 0.00    | 0.00    | 0.00    |      | 0.00    |      | 0.00    |
| <b>trough_indicator</b>   | True    |      |      |      | 1.00    |      | 1.00    |      | 1.00   |      | 1.00    | 1.00    | 1.00  | 0.00    | 1.00    | 0.00    | 0.00    |      | 1.00    |      | 1.00    |
| <b>U_D_depth</b>          | 0.36    |      |      |      | 0.78    |      | 0.59    |      | 0.41   |      | 0.10    | 0.53    | 0.77  | 0.00    | 0.45    | 0.00    | 0.00    |      | 0.46    |      | 0.18    |
| <b>U_I_interiority</b>    | 0.01    |      |      |      | 0.00    |      | 0.00    |      | 0.06   |      | 0.00    | 0.00    | 0.04  | 0.00    | 0.00    | 0.00    | 0.00    |      | 0.00    |      | 0.00    |
| <b>U_M_monotonicity</b>   | 0.60    |      |      |      | 0.82    |      | 0.89    |      | 0.84   |      | 0.84    | 0.75    | 0.80  | 0.00    | 0.80    | 0.00    | 0.00    |      | 0.79    |      | 0.70    |
| <b>U_C_convexity</b>      | 0.65    |      |      |      | 0.70    |      | 0.80    |      | 0.73   |      | 1.00    | 0.68    | 1.00  | 0.00    | 0.67    | 0.00    | 0.70    |      | 0.78    |      | 0.80    |
| <b>U_S_symmetry</b>       | 0.48    |      |      |      | 0.88    |      | 0.74    |      | 0.60   |      | 0.18    | 0.69    | 0.87  | 0.00    | 0.62    | 0.00    | 0.00    |      | 0.89    |      | 0.31    |
| <b>J_R_rise</b>           | 0.04    |      |      |      | 0.00    |      | 0.41    |      | 0.00   |      | 0.00    | 0.00    | 0.00  | 0.00    | 0.00    | 0.00    | 0.00    |      | 0.12    |      | 0.00    |
| <b>J_M_monotonicity</b>   | 0.43    |      |      |      | 0.38    |      | 0.27    |      | 0.38   |      | 0.35    | 0.47    | 0.43  | 0.41    | 0.40    | 0.50    | 0.51    |      | 0.57    |      | 0.54    |

|                        |         |         |         |      |         |         |      |         |         |         |         |         |         |
|------------------------|---------|---------|---------|------|---------|---------|------|---------|---------|---------|---------|---------|---------|
| <b>J_C_rightconvex</b> | 0.54    | 0.51    | 0.59    | 0.58 | 0.90    | 0.53    | 0.95 | 0.51    | 0.66    | 0.00    | 0.28    | 0.52    | 0.45    |
| <b>P_turning</b>       | 0.10    | 0.06    | 0.50    | 0.03 | 0.06    | 0.00    | 0.06 | 0.01    | 0.25    | 0.03    | 0.12    | 0.03    | 0.01    |
| <b>final_structure</b> | neither | neither | neither | U    | neither | neither | U    | neither | neither | neither | neither | neither | neither |
| <b>U_supported</b>     | False   | 0.00    | 0.00    | 1.00 | 0.00    | 0.00    | 1.00 | 0.00    | 0.00    | 0.00    | 0.00    | 0.00    | 0.00    |
| <b>J_supported</b>     | False   | 0.00    | 0.00    | 0.00 | 0.00    | 0.00    | 0.00 | 0.00    | 0.00    | 0.00    | 0.00    | 0.00    | 0.00    |

Table S6as. France Cantril U-shape ratings, 2006-2024

| KPI                       | Mean    | 2005   | 2006 | 2007 | 2008 | 2009    | 2010  | 2011    | 2012    | 2013  | 2014    | 2015 | 2016    | 2017    | 2018    | 2019    | 2020    | 2021    | 2022    | 2023    | 2024  |
|---------------------------|---------|--------|------|------|------|---------|-------|---------|---------|-------|---------|------|---------|---------|---------|---------|---------|---------|---------|---------|-------|
| <b>shape_class</b>        | neither | U      |      |      |      | neither | U     | neither | neither | U     | neither |      | neither | U     |
| <b>U_beauty</b>           | 0.01    | 0.01   |      |      |      | 0.00    | 0.08  | 0.00    | 0.00    | 0.05  | 0.00    |      | 0.00    | 0.00    | 0.00    | 0.00    | 0.00    | 0.00    | 0.00    | 0.00    | 0.01  |
| <b>J_beauty</b>           | 0.00    | 0.00   |      |      |      | 0.00    | 0.01  | 0.00    | 0.00    | 0.00  | 0.00    |      | 0.00    | 0.04    | 0.00    | 0.00    | 0.00    | 0.00    | 0.00    | 0.00    | 0.01  |
| <b>Dominance</b>          | -0.26   | 0.29   |      |      |      |         | 0.83  | -1.00   |         | 1.00  |         |      | -1.00   | -1.00   |         |         |         |         |         | -1.00   | -0.18 |
| <b>best_df</b>            | 4.31    | 5.00   |      |      |      | 5.00    | 5.00  | 4.00    | 4.00    | 4.00  | 5.00    |      | 5.00    | 3.00    | 5.00    | 5.00    | 5.00    | 3.00    | 5.00    | 3.00    | 3.00  |
| <b>p_value</b>            | 0.00    | 0.00   |      |      |      | 0.00    | 0.01  | 0.00    | 0.00    | 0.00  | 0.00    |      | 0.00    | 0.00    | 0.00    | 0.00    | 0.00    | 0.00    | 0.00    | 0.02    | 0.00  |
| <b>lr_stat</b>            | 44.22   | 82.79  |      |      |      | 49.67   | 20.62 | 54.64   | 29.21   | 25.60 | 35.40   |      | 38.57   | 49.54   | 59.80   | 71.47   | 90.80   | 22.91   | 23.91   | 17.13   | 35.53 |
| <b>linear_aic</b>         | 23.34   | 43.95  |      |      |      | 33.12   | 12.46 | 15.34   | 1.56    | 13.52 | 14.66   |      | 15.17   | 20.00   | 38.06   | 47.99   | 38.84   | 17.76   | 15.01   | 17.44   | 28.63 |
| <b>spline_aic</b>         | -4.26   | -20.84 |      |      |      | 1.46    | 9.84  | -23.30  | -11.65  | 3.92  | -2.74   |      | -5.40   | -15.54  | -3.74   | -5.49   | -33.96  | 8.84    | 9.10    | 14.31   | 7.10  |
| <b>min_age</b>            | 75.68   | 82.60  |      |      |      |         | 54.97 | 85.42   |         | 60.23 |         |      |         |         |         |         |         |         |         | 88.43   | 82.41 |
| <b>min_value</b>          | 6.15    | 6.07   |      |      |      |         | 6.53  | 5.91    |         | 6.06  |         |      |         |         |         |         |         |         |         |         | 6.00  |
| <b>amplitude</b>          | 2.36    | 3.93   |      |      |      | 3.95    | 0.96  | 1.59    | 1.42    | 1.24  | 2.07    |      | 1.50    | 1.77    | 3.68    | 5.10    | 3.78    | 1.91    | 1.25    | 1.32    | 2.32  |
| <b>delta_endpoints</b>    | -0.73   | 2.98   |      |      |      | -3.95   | 0.74  | 0.41    | -1.42   | -0.96 | -1.98   |      | 1.50    | 1.77    | -2.48   | -5.09   | -3.42   | -1.91   | 0.58    | -0.02   | 1.64  |
| <b>n_minima</b>           | 2.88    | 4.00   |      |      |      | 2.00    | 3.00  | 3.00    | 2.00    | 3.00  | 2.00    |      | 4.00    | 2.00    | 3.00    | 4.00    | 3.00    | 2.00    | 4.00    | 2.00    | 3.00  |
| <b>n_maxima</b>           | 2.94    | 3.00   |      |      |      | 2.00    | 3.00  | 3.00    | 2.00    | 3.00  | 3.00    |      | 4.00    | 2.00    | 4.00    | 4.00    | 3.00    | 2.00    | 4.00    | 3.00    | 2.00  |
| <b>turning_points</b>     | 5.81    | 7.00   |      |      |      | 4.00    | 6.00  | 6.00    | 4.00    | 6.00  | 5.00    |      | 8.00    | 4.00    | 7.00    | 8.00    | 6.00    | 4.00    | 8.00    | 5.00    | 5.00  |
| <b>r_trough</b>           | 0.79    | 0.87   |      |      |      | 1.00    | 0.51  | 0.91    | 1.00    | 0.58  | 1.00    |      | 0.00    | 0.00    | 1.00    | 1.00    | 1.00    | 1.00    | 0.95    | 1.00    | 0.87  |
| <b>interior_indicator</b> | False   | 1.00   |      |      |      | 0.00    | 1.00  | 0.00    | 0.00    | 1.00  | 0.00    |      | 0.00    | 0.00    | 0.00    | 0.00    | 0.00    | 0.00    | 0.00    | 0.00    | 1.00  |
| <b>trough_indicator</b>   | False   | 1.00   |      |      |      | 0.00    | 1.00  | 1.00    | 0.00    | 1.00  | 0.00    |      | 0.00    | 0.00    | 0.00    | 0.00    | 0.00    | 0.00    | 1.00    | 0.00    | 1.00  |
| <b>U_D_depth</b>          | 0.13    | 0.24   |      |      |      | 0.00    | 0.23  | 0.74    | 0.00    | 0.22  | 0.00    |      | 0.00    | 0.00    | 0.00    | 0.00    | 0.00    | 0.00    | 0.33    | 0.00    | 0.30  |
| <b>U_I_interiority</b>    | 0.12    | 0.06   |      |      |      | 0.00    | 0.98  | 0.00    | 0.00    | 0.81  | 0.00    |      | 0.00    | 0.00    | 0.00    | 0.00    | 0.00    | 0.00    | 0.00    | 0.00    | 0.07  |
| <b>U_M_monotonicity</b>   | 0.28    | 0.78   |      |      |      | 0.00    | 0.68  | 0.81    | 0.00    | 0.63  | 0.00    |      | 0.00    | 0.00    | 0.00    | 0.00    | 0.00    | 0.00    | 0.73    | 0.00    | 0.78  |
| <b>U_C_convexity</b>      | 0.43    | 0.85   |      |      |      | 0.75    | 0.96  | 0.73    | 0.00    | 0.95  | 0.00    |      | 0.73    | 0.00    | 0.00    | 0.00    | 0.00    | 0.35    | 0.64    | 0.00    | 0.87  |
| <b>U_S_symmetry</b>       | 0.19    | 0.39   |      |      |      | 0.00    | 0.37  | 0.85    | 0.00    | 0.36  | 0.00    |      | 0.00    | 0.00    | 0.00    | 0.00    | 0.00    | 0.00    | 0.59    | 0.00    | 0.46  |
| <b>J_R_rise</b>           | 0.31    | 0.76   |      |      |      | 0.00    | 0.77  | 0.26    | 0.00    | 0.00  | 0.00    |      | 1.00    | 1.00    | 0.00    | 0.00    | 0.00    | 0.00    | 0.47    | 0.00    | 0.70  |
| <b>J_M_monotonicity</b>   | 0.42    | 0.47   |      |      |      | 0.22    | 0.52  | 0.41    | 0.33    | 0.41  | 0.26    |      | 0.59    | 0.51    | 0.43    | 0.37    | 0.34    | 0.36    | 0.49    | 0.58    | 0.47  |
| <b>J_C_rightconvex</b>    | 0.50    | 0.78   |      |      |      | 0.38    | 0.47  | 0.55    | 0.35    | 0.37  | 0.49    |      | 0.65    | 0.81    | 0.51    | 0.31    | 0.50    | 0.14    | 0.57    | 0.25    | 0.81  |
| <b>P_turning</b>          | 0.05    | 0.01   |      |      |      | 0.12    | 0.03  | 0.03    | 0.12    | 0.03  | 0.06    |      | 0.01    | 0.12    | 0.01    | 0.01    | 0.03    | 0.12    | 0.01    | 0.06    | 0.06  |
| <b>final_structure</b>    | neither | U      |      |      |      | neither | U     | neither | neither | U     | neither |      | neither | U     |
| <b>U_supported</b>        | False   | 1.00   |      |      |      | 0.00    | 1.00  | 0.00    | 0.00    | 1.00  | 0.00    |      | 0.00    | 0.00    | 0.00    | 0.00    | 0.00    | 0.00    | 0.00    | 0.00    | 1.00  |
| <b>J_supported</b>        | False   | 0.00   |      |      |      | 0.00    | 0.00  | 0.00    | 0.00    | 0.00  | 0.00    |      | 0.00    | 0.00    | 0.00    | 0.00    | 0.00    | 0.00    | 0.00    | 0.00    | 0.00  |

Table S6at. Gabon Cantril U-shape ratings, 2006-2024

| KPI                | Mean  | 2005 | 2006 | 2007 | 2008 | 2009 | 2010 | 2011 | 2012 | 2013 | 2014  | 2015 | 2016 | 2017 | 2018 | 2019 | 2020 | 2021 | 2022 | 2023 | 2024  |
|--------------------|-------|------|------|------|------|------|------|------|------|------|-------|------|------|------|------|------|------|------|------|------|-------|
| shape_class        | U     |      |      |      |      |      |      |      |      |      | U     |      |      |      |      |      |      |      |      |      | U     |
| U_beauty           | 0.05  |      |      |      |      |      |      |      |      |      | 0.03  |      |      |      |      |      |      |      |      |      | 0.07  |
| J_beauty           | 0.00  |      |      |      |      |      |      |      |      |      | 0.00  |      |      |      |      |      |      |      |      |      | 0.00  |
| Dominance          | 1.00  |      |      |      |      |      |      |      |      |      | 1.00  |      |      |      |      |      |      |      |      |      | 1.00  |
| best_df            | 4.50  |      |      |      |      |      |      |      |      |      | 5.00  |      |      |      |      |      |      |      |      |      | 4.00  |
| p_value            | 0.00  |      |      |      |      |      |      |      |      |      | 0.00  |      |      |      |      |      |      |      |      |      | 0.00  |
| lr_stat            | 35.71 |      |      |      |      |      |      |      |      |      | 37.63 |      |      |      |      |      |      |      |      |      | 33.78 |
| linear_aic         | 31.86 |      |      |      |      |      |      |      |      |      | 19.52 |      |      |      |      |      |      |      |      |      | 44.21 |
| spline_aic         | 13.16 |      |      |      |      |      |      |      |      |      | -0.11 |      |      |      |      |      |      |      |      |      | 26.42 |
| min_age            | 76.77 |      |      |      |      |      |      |      |      |      | 74.71 |      |      |      |      |      |      |      |      |      | 78.84 |
| min_value          | 2.31  |      |      |      |      |      |      |      |      |      | 2.45  |      |      |      |      |      |      |      |      |      | 2.16  |
| amplitude          | 2.98  |      |      |      |      |      |      |      |      |      | 1.92  |      |      |      |      |      |      |      |      |      | 4.05  |
| delta_endpoints    | -1.05 |      |      |      |      |      |      |      |      |      | -1.07 |      |      |      |      |      |      |      |      |      | -1.04 |
| n_minima           | 3.00  |      |      |      |      |      |      |      |      |      | 3.00  |      |      |      |      |      |      |      |      |      | 3.00  |
| n_maxima           | 3.50  |      |      |      |      |      |      |      |      |      | 4.00  |      |      |      |      |      |      |      |      |      | 3.00  |
| turning_points     | 6.50  |      |      |      |      |      |      |      |      |      | 7.00  |      |      |      |      |      |      |      |      |      | 6.00  |
| r_trough           | 0.80  |      |      |      |      |      |      |      |      |      | 0.77  |      |      |      |      |      |      |      |      |      | 0.82  |
| interior_indicator | True  |      |      |      |      |      |      |      |      |      | 1.00  |      |      |      |      |      |      |      |      |      | 1.00  |
| trough_indicator   | True  |      |      |      |      |      |      |      |      |      | 1.00  |      |      |      |      |      |      |      |      |      | 1.00  |
| U_D_depth          | 0.49  |      |      |      |      |      |      |      |      |      | 0.28  |      |      |      |      |      |      |      |      |      | 0.69  |
| U_I_interiority    | 0.26  |      |      |      |      |      |      |      |      |      | 0.33  |      |      |      |      |      |      |      |      |      | 0.19  |
| U_M_monotonicity   | 0.70  |      |      |      |      |      |      |      |      |      | 0.65  |      |      |      |      |      |      |      |      |      | 0.76  |
| U_C_convexity      | 0.75  |      |      |      |      |      |      |      |      |      | 0.77  |      |      |      |      |      |      |      |      |      | 0.73  |
| U_S_symmetry       | 0.67  |      |      |      |      |      |      |      |      |      | 0.51  |      |      |      |      |      |      |      |      |      | 0.84  |
| J_R_rise           | 0.00  |      |      |      |      |      |      |      |      |      | 0.00  |      |      |      |      |      |      |      |      |      | 0.00  |
| J_M_monotonicity   | 0.40  |      |      |      |      |      |      |      |      |      | 0.44  |      |      |      |      |      |      |      |      |      | 0.36  |
| J_C_rightconvex    | 0.47  |      |      |      |      |      |      |      |      |      | 0.36  |      |      |      |      |      |      |      |      |      | 0.58  |
| P_turning          | 0.02  |      |      |      |      |      |      |      |      |      | 0.01  |      |      |      |      |      |      |      |      |      | 0.03  |
| final_structure    | U     |      |      |      |      |      |      |      |      |      | U     |      |      |      |      |      |      |      |      |      | U     |
| U_supported        | True  |      |      |      |      |      |      |      |      |      | 1.00  |      |      |      |      |      |      |      |      |      | 1.00  |
| J_supported        | False |      |      |      |      |      |      |      |      |      | 0.00  |      |      |      |      |      |      |      |      |      | 0.00  |

Table S6au. Gambia Cantril U-shape ratings, 2006-2024

| KPI         | Mean    | 2005 | 2006 | 2007 | 2008 | 2009 | 2010 | 2011 | 2012 | 2013 | 2014 | 2015 | 2016 | 2017    | 2018    | 2019 | 2020 | 2021 | 2022    | 2023 | 2024 |
|-------------|---------|------|------|------|------|------|------|------|------|------|------|------|------|---------|---------|------|------|------|---------|------|------|
| shape_class | neither |      |      |      |      |      |      |      |      |      |      |      |      | neither | neither | U    |      |      | neither | U    |      |
| U_beauty    | 0.02    |      |      |      |      |      |      |      |      |      |      |      |      | 0.00    | 0.00    | 0.02 |      |      | 0.00    | 0.07 |      |
| J_beauty    | 0.00    |      |      |      |      |      |      |      |      |      |      |      |      | 0.00    | 0.00    | 0.00 |      |      | 0.00    | 0.00 |      |
| Dominance   | 0.33    |      |      |      |      |      |      |      |      |      |      |      |      |         | -1.00   | 1.00 |      |      |         | 1.00 |      |
| best_df     | 3.60    |      |      |      |      |      |      |      |      |      |      |      |      | 3.00    | 3.00    | 5.00 |      |      | 3.00    | 4.00 |      |
| p_value     | 0.23    |      |      |      |      |      |      |      |      |      |      |      |      | 0.97    | 0.00    | 0.00 |      |      | 0.02    | 0.17 |      |

|                    |         |  |  |  |  |  |  |  |  |  |  |  |  |         |         |       |  |  |  |         |       |
|--------------------|---------|--|--|--|--|--|--|--|--|--|--|--|--|---------|---------|-------|--|--|--|---------|-------|
| lr_stat            | 18.27   |  |  |  |  |  |  |  |  |  |  |  |  | 1.90    | 28.90   | 31.54 |  |  |  | 17.36   | 11.66 |
| linear_aic         | 34.25   |  |  |  |  |  |  |  |  |  |  |  |  | 38.14   | 40.48   | 36.93 |  |  |  | 28.13   | 27.56 |
| spline_aic         | 31.18   |  |  |  |  |  |  |  |  |  |  |  |  | 50.24   | 25.58   | 23.39 |  |  |  | 24.78   | 31.90 |
| min_age            | 85.12   |  |  |  |  |  |  |  |  |  |  |  |  | 89.18   | 85.98   | 79.59 |  |  |  | 90.12   | 80.72 |
| min_value          | 3.27    |  |  |  |  |  |  |  |  |  |  |  |  | 3.22    | 2.76    | 3.86  |  |  |  | 2.89    | 3.61  |
| amplitude          | 2.23    |  |  |  |  |  |  |  |  |  |  |  |  | 1.17    | 3.27    | 3.21  |  |  |  | 1.94    | 1.58  |
| delta_endpoints    | -0.70   |  |  |  |  |  |  |  |  |  |  |  |  | -0.92   | 0.31    | -0.90 |  |  |  | -1.77   | -0.23 |
| n_minima           | 3.40    |  |  |  |  |  |  |  |  |  |  |  |  | 3.00    | 3.00    | 4.00  |  |  |  | 3.00    | 4.00  |
| n_maxima           | 2.60    |  |  |  |  |  |  |  |  |  |  |  |  | 2.00    | 2.00    | 4.00  |  |  |  | 2.00    | 3.00  |
| turning_points     | 6.00    |  |  |  |  |  |  |  |  |  |  |  |  | 5.00    | 5.00    | 8.00  |  |  |  | 5.00    | 7.00  |
| r_trough           | 0.91    |  |  |  |  |  |  |  |  |  |  |  |  | 0.96    | 0.92    | 0.83  |  |  |  | 0.97    | 0.85  |
| interior_indicator | False   |  |  |  |  |  |  |  |  |  |  |  |  | 0.00    | 0.00    | 1.00  |  |  |  | 0.00    | 1.00  |
| trough_indicator   | True    |  |  |  |  |  |  |  |  |  |  |  |  | 1.00    | 1.00    | 1.00  |  |  |  | 1.00    | 1.00  |
| U_D_depth          | 0.47    |  |  |  |  |  |  |  |  |  |  |  |  | 0.14    | 0.90    | 0.36  |  |  |  | 0.08    | 0.86  |
| U_I_interiority    | 0.06    |  |  |  |  |  |  |  |  |  |  |  |  | 0.00    | 0.00    | 0.16  |  |  |  | 0.00    | 0.13  |
| U_M_monotonicity   | 0.78    |  |  |  |  |  |  |  |  |  |  |  |  | 0.81    | 0.84    | 0.65  |  |  |  | 0.82    | 0.77  |
| U_C_convexity      | 0.77    |  |  |  |  |  |  |  |  |  |  |  |  | 0.78    | 0.78    | 0.59  |  |  |  | 0.84    | 0.86  |
| U_S_symmetry       | 0.60    |  |  |  |  |  |  |  |  |  |  |  |  | 0.26    | 0.95    | 0.72  |  |  |  | 0.15    | 0.92  |
| J_R_rise           | 0.02    |  |  |  |  |  |  |  |  |  |  |  |  | 0.00    | 0.10    | 0.00  |  |  |  | 0.00    | 0.00  |
| J_M_monotonicity   | 0.41    |  |  |  |  |  |  |  |  |  |  |  |  | 0.37    | 0.36    | 0.48  |  |  |  | 0.35    | 0.49  |
| J_C_rightconvex    | 0.51    |  |  |  |  |  |  |  |  |  |  |  |  | 0.43    | 0.56    | 0.47  |  |  |  | 0.42    | 0.68  |
| P_turning          | 0.04    |  |  |  |  |  |  |  |  |  |  |  |  | 0.06    | 0.06    | 0.01  |  |  |  | 0.06    | 0.01  |
| final_structure    | neither |  |  |  |  |  |  |  |  |  |  |  |  | neither | neither | U     |  |  |  | neither | U     |
| U_supported        | False   |  |  |  |  |  |  |  |  |  |  |  |  | 0.00    | 0.00    | 1.00  |  |  |  | 0.00    | 1.00  |
| J_supported        | False   |  |  |  |  |  |  |  |  |  |  |  |  | 0.00    | 0.00    | 0.00  |  |  |  | 0.00    | 0.00  |

Table S6av. Georgia Cantril U-shape ratings, 2006-2024

| KPI             | Mean    | 2005 | 2006   | 2007 | 2008 | 2009    | 2010 | 2011 | 2012 | 2013 | 2014 | 2015    | 2016    | 2017    | 2018    | 2019    | 2020 | 2021 | 2022    | 2023    | 2024  |       |
|-----------------|---------|------|--------|------|------|---------|------|------|------|------|------|---------|---------|---------|---------|---------|------|------|---------|---------|-------|-------|
| shape_class     | neither |      | U      |      |      | neither |      |      |      |      |      | neither | neither | neither | neither | neither |      |      | neither | neither | U     | U     |
| U_beauty        | 0.01    |      | 0.06   |      |      | 0.00    |      |      |      |      |      | 0.00    | 0.00    | 0.00    | 0.00    | 0.00    |      |      | 0.00    | 0.00    | 0.02  | 0.05  |
| J_beauty        | 0.00    |      | 0.00   |      |      | 0.00    |      |      |      |      |      | 0.00    | 0.00    | 0.00    | 0.00    | 0.00    |      |      | 0.00    | 0.00    | 0.00  | 0.00  |
| Dominance       | 0.95    |      | 1.00   |      |      |         |      |      |      |      |      |         |         |         |         |         |      |      |         |         | 1.00  | 0.85  |
| best_df         | 4.45    |      | 5.00   |      |      | 5.00    |      |      |      |      |      | 5.00    | 5.00    | 5.00    | 5.00    | 5.00    |      |      | 4.00    | 3.00    | 4.00  | 3.00  |
| p_value         | 0.01    |      | 0.00   |      |      | 0.00    |      |      |      |      |      | 0.00    | 0.00    | 0.06    | 0.00    | 0.00    |      |      | 0.02    | 0.00    | 0.00  | 0.00  |
| lr_stat         | 37.32   |      | 48.35  |      |      | 38.51   |      |      |      |      |      | 58.84   | 47.97   | 16.61   | 34.25   | 29.07   |      |      | 18.64   | 45.55   | 27.34 | 45.37 |
| linear_aic      | 17.56   |      | 20.14  |      |      | 27.57   |      |      |      |      |      | 28.12   | 4.48    | 4.05    | 10.54   | 11.97   |      |      | 10.48   | 31.26   | 13.54 | 31.05 |
| spline_aic      | -2.85   |      | -10.21 |      |      | 7.06    |      |      |      |      |      | -12.72  | -25.49  | 5.44    | -5.70   | 0.90    |      |      | 7.84    | -0.29   | 2.19  | -0.32 |
| min_age         | 84.56   |      | 81.10  |      |      | 86.92   |      |      |      |      |      | 87.30   | 86.74   |         | 88.05   |         |      |      | 90.50   | 85.42   | 73.39 | 81.66 |
| min_value       | 3.34    |      | 2.49   |      |      | 1.90    |      |      |      |      |      | 2.88    | 3.41    |         | 2.87    |         |      |      | 3.18    | 3.97    | 4.63  | 4.73  |
| amplitude       | 2.49    |      | 1.94   |      |      | 3.17    |      |      |      |      |      | 2.64    | 2.41    | 1.82    | 3.08    | 2.25    |      |      | 2.55    | 3.20    | 2.08  | 2.27  |
| delta_endpoints | -1.35   |      | -0.43  |      |      | -1.08   |      |      |      |      |      | -0.52   | -1.83   | -1.82   | -1.94   | -2.25   |      |      | -2.46   | -1.45   | -1.71 | 0.65  |
| n_minima        | 2.91    |      | 3.00   |      |      | 2.00    |      |      |      |      |      | 3.00    | 3.00    | 4.00    | 2.00    | 2.00    |      |      | 4.00    | 3.00    | 3.00  | 3.00  |
| n_maxima        | 2.45    |      | 3.00   |      |      | 1.00    |      |      |      |      |      | 2.00    | 2.00    | 4.00    | 2.00    | 2.00    |      |      | 4.00    | 2.00    | 3.00  | 2.00  |
| turning_points  | 5.36    |      | 6.00   |      |      | 3.00    |      |      |      |      |      | 5.00    | 5.00    | 8.00    | 4.00    | 4.00    |      |      | 8.00    | 5.00    | 6.00  | 5.00  |

|                           |         |      |         |  |         |         |         |         |         |  |         |         |      |      |
|---------------------------|---------|------|---------|--|---------|---------|---------|---------|---------|--|---------|---------|------|------|
| <b>r_trough</b>           | 0.92    | 0.85 | 0.93    |  | 0.94    | 0.93    | 1.00    | 0.95    | 1.00    |  | 0.98    | 0.91    | 0.75 | 0.86 |
| <b>interior_indicator</b> | False   | 1.00 | 0.00    |  | 0.00    | 0.00    | 0.00    | 0.00    | 0.00    |  | 0.00    | 0.00    | 1.00 | 1.00 |
| <b>trough_indicator</b>   | True    | 1.00 | 1.00    |  | 1.00    | 1.00    | 0.00    | 1.00    | 0.00    |  | 1.00    | 1.00    | 1.00 | 1.00 |
| <b>U_D_depth</b>          | 0.39    | 0.78 | 0.66    |  | 0.80    | 0.24    | 0.00    | 0.37    | 0.00    |  | 0.03    | 0.55    | 0.18 | 0.72 |
| <b>U_I_interiority</b>    | 0.05    | 0.11 | 0.00    |  | 0.00    | 0.00    | 0.00    | 0.00    | 0.00    |  | 0.00    | 0.00    | 0.37 | 0.09 |
| <b>U_M_monotonicity</b>   | 0.72    | 0.88 | 0.96    |  | 0.88    | 0.94    | 0.00    | 0.92    | 0.00    |  | 0.86    | 0.86    | 0.77 | 0.85 |
| <b>U_C_convexity</b>      | 0.71    | 0.71 | 0.64    |  | 0.66    | 0.68    | 0.68    | 0.69    | 0.20    |  | 0.85    | 0.79    | 0.96 | 1.00 |
| <b>U_S_symmetry</b>       | 0.49    | 0.88 | 0.79    |  | 0.89    | 0.39    | 0.00    | 0.54    | 0.00    |  | 0.05    | 0.71    | 0.30 | 0.83 |
| <b>J_R_rise</b>           | 0.03    | 0.00 | 0.00    |  | 0.00    | 0.00    | 0.00    | 0.00    | 0.00    |  | 0.00    | 0.00    | 0.00 | 0.28 |
| <b>J_M_monotonicity</b>   | 0.29    | 0.34 | 0.14    |  | 0.28    | 0.18    | 0.38    | 0.20    | 0.23    |  | 0.27    | 0.33    | 0.47 | 0.38 |
| <b>J_C_rightconvex</b>    | 0.55    | 0.56 | 0.59    |  | 0.54    | 0.63    | 0.50    | 0.44    | 0.37    |  | 0.41    | 0.59    | 0.37 | 1.00 |
| <b>P_turning</b>          | 0.07    | 0.03 | 0.25    |  | 0.06    | 0.06    | 0.01    | 0.12    | 0.12    |  | 0.01    | 0.06    | 0.03 | 0.06 |
| <b>final_structure</b>    | neither | U    | neither |  | neither | neither | neither | neither | neither |  | neither | neither | U    | U    |
| <b>U_supported</b>        | False   | 1.00 | 0.00    |  | 0.00    | 0.00    | 0.00    | 0.00    | 0.00    |  | 0.00    | 0.00    | 1.00 | 1.00 |
| <b>J_supported</b>        | False   | 0.00 | 0.00    |  | 0.00    | 0.00    | 0.00    | 0.00    | 0.00    |  | 0.00    | 0.00    | 0.00 | 0.00 |

Table S6aw. Germany Cantril U-shape ratings, 2006-2024

| KPI                       | Mean    | 2005    | 2006 | 2007  | 2008    | 2009    | 2010    | 2011   | 2012   | 2013    | 2014   | 2015    | 2016    | 2017 | 2018    | 2019  | 2020    | 2021  | 2022    | 2023 | 2024    |
|---------------------------|---------|---------|------|-------|---------|---------|---------|--------|--------|---------|--------|---------|---------|------|---------|-------|---------|-------|---------|------|---------|
| <b>shape_class</b>        | neither | neither |      | U     | neither | neither | neither | U      | U      | neither | U      | neither | neither |      | neither | U     | neither | U     | neither |      | neither |
| <b>U_beauty</b>           | 0.01    | 0.00    |      | 0.10  | 0.00    | 0.00    | 0.00    | 0.00   | 0.02   | 0.00    | 0.00   | 0.00    | 0.00    |      | 0.00    | 0.03  | 0.00    | 0.00  | 0.00    |      | 0.00    |
| <b>J_beauty</b>           | 0.00    | 0.00    |      | 0.01  | 0.00    | 0.00    | 0.00    | 0.00   | 0.00   | 0.00    | 0.00   | 0.00    | 0.00    |      | 0.00    | 0.00  | 0.00    | 0.00  | 0.00    |      | 0.00    |
| <b>Dominance</b>          | 0.70    |         |      | 0.87  |         |         |         | 1.00   | 1.00   |         | 1.00   |         | -1.00   |      | 1.00    |       | 1.00    |       |         |      |         |
| <b>best_df</b>            | 4.29    | 4.00    |      | 4.00  | 5.00    | 5.00    | 5.00    | 3.00   | 5.00   | 3.00    | 4.00   | 3.00    | 5.00    |      | 4.00    | 5.00  | 5.00    | 5.00  | 5.00    |      | 3.00    |
| <b>p_value</b>            | 0.01    | 0.00    |      | 0.00  | 0.00    | 0.00    | 0.00    | 0.00   | 0.00   | 0.04    | 0.00   | 0.00    | 0.00    |      | 0.00    | 0.00  | 0.00    | 0.01  | 0.01    |      | 0.09    |
| <b>lr_stat</b>            | 37.06   | 38.18   |      | 47.37 | 41.79   | 61.30   | 31.72   | 40.41  | 59.48  | 14.56   | 22.64  | 35.51   | 48.19   |      | 25.96   | 27.91 | 76.88   | 22.17 | 23.41   |      | 12.49   |
| <b>linear_aic</b>         | 11.56   | 41.67   |      | 30.28 | -9.49   | 2.99    | 22.59   | -3.97  | -1.07  | 8.51    | -10.44 | 28.38   | 23.48   |      | 7.31    | 8.51  | 31.20   | 2.07  | 3.70    |      | 10.78   |
| <b>spline_aic</b>         | -8.91   | 19.48   |      | -1.09 | -33.28  | -40.30  | 8.87    | -30.38 | -42.55 | 7.96    | -17.08 | 6.86    | -6.71   |      | -2.65   | -1.40 | -27.68  | -2.10 | -1.71   |      | 12.30   |
| <b>min_age</b>            | 81.35   |         |      | 77.90 | 90.31   |         | 87.11   | 79.41  | 82.98  | 89.74   | 84.11  |         | 87.49   |      | 86.55   | 82.41 |         | 46.89 |         |      |         |
| <b>min_value</b>          | 6.05    |         |      | 5.75  | 5.96    |         | 5.63    | 6.19   | 6.18   | 6.25    | 6.51   |         | 5.32    |      | 6.09    | 6.15  |         | 6.49  |         |      |         |
| <b>amplitude</b>          | 1.80    | 4.04    |      | 2.26  | 1.51    | 2.43    | 1.95    | 1.29   | 1.34   | 1.59    | 0.81   | 2.91    | 2.18    |      | 1.43    | 1.20  | 2.82    | 0.82  | 0.99    |      | 0.96    |
| <b>delta_endpoints</b>    | -0.95   | -3.56   |      | 0.75  | -1.47   | -2.43   | -0.16   | -1.27  | -0.56  | -1.49   | -0.32  | -2.91   | 0.65    |      | -0.54   | 0.00  | -2.00   | -0.34 | -0.41   |      | -0.02   |
| <b>n_minima</b>           | 3.29    | 3.00    |      | 3.00  | 5.00    | 3.00    | 4.00    | 3.00   | 2.00   | 3.00    | 3.00   | 2.00    | 5.00    |      | 4.00    | 3.00  | 4.00    | 4.00  | 3.00    |      | 2.00    |
| <b>n_maxima</b>           | 3.29    | 4.00    |      | 2.00  | 4.00    | 4.00    | 4.00    | 3.00   | 1.00   | 3.00    | 3.00   | 2.00    | 4.00    |      | 3.00    | 3.00  | 4.00    | 5.00  | 4.00    |      | 3.00    |
| <b>turning_points</b>     | 6.59    | 7.00    |      | 5.00  | 9.00    | 7.00    | 8.00    | 6.00   | 3.00   | 6.00    | 6.00   | 4.00    | 9.00    |      | 7.00    | 6.00  | 8.00    | 9.00  | 7.00    |      | 5.00    |
| <b>r_trough</b>           | 0.91    | 1.00    |      | 0.81  | 0.98    | 1.00    | 0.93    | 0.83   | 0.88   | 0.97    | 0.89   | 1.00    | 0.94    |      | 0.93    | 0.87  | 1.00    | 0.40  | 1.00    |      | 1.00    |
| <b>interior_indicator</b> | False   | 0.00    |      | 1.00  | 0.00    | 0.00    | 0.00    | 1.00   | 1.00   | 0.00    | 1.00   | 0.00    | 0.00    |      | 0.00    | 1.00  | 0.00    | 1.00  | 0.00    |      | 0.00    |
| <b>trough_indicator</b>   | True    | 0.00    |      | 1.00  | 1.00    | 0.00    | 1.00    | 1.00   | 1.00   | 1.00    | 1.00   | 0.00    | 1.00    |      | 1.00    | 1.00  | 0.00    | 1.00  | 0.00    |      | 0.00    |
| <b>U_D_depth</b>          | 0.29    | 0.00    |      | 0.67  | 0.03    | 0.00    | 0.91    | 0.01   | 0.58   | 0.04    | 0.59   | 0.00    | 0.70    |      | 0.62    | 0.71  | 0.00    | 0.01  | 0.00    |      | 0.00    |
| <b>U_I_interiority</b>    | 0.07    | 0.00    |      | 0.22  | 0.00    | 0.00    | 0.00    | 0.17   | 0.05   | 0.00    | 0.01   | 0.00    | 0.00    |      | 0.00    | 0.07  | 0.00    | 0.75  | 0.00    |      | 0.00    |
| <b>U_M_monotonicity</b>   | 0.50    | 0.00    |      | 0.81  | 0.83    | 0.00    | 0.80    | 0.64   | 0.91   | 0.80    | 0.80   | 0.00    | 0.75    |      | 0.80    | 0.76  | 0.00    | 0.59  | 0.00    |      | 0.00    |
| <b>U_C_convexity</b>      | 0.52    | 0.00    |      | 1.00  | 0.71    | 0.00    | 0.67    | 0.73   | 0.96   | 0.90    | 1.00   | 0.00    | 0.66    |      | 0.81    | 0.77  | 0.00    | 0.67  | 0.00    |      | 0.00    |
| <b>U_S_symmetry</b>       | 0.35    | 0.00    |      | 0.80  | 0.05    | 0.00    | 0.96    | 0.03   | 0.74   | 0.08    | 0.75   | 0.00    | 0.82    |      | 0.77    | 1.00  | 0.00    | 0.04  | 0.00    |      | 0.00    |
| <b>J_R_rise</b>           | 0.04    | 0.00    |      | 0.33  | 0.00    | 0.00    | 0.00    | 0.00   | 0.00   | 0.00    | 0.00   | 0.00    | 0.30    |      | 0.00    | 0.00  | 0.00    | 0.00  | 0.00    |      | 0.00    |
| <b>J_M_monotonicity</b>   | 0.41    | 0.45    |      | 0.47  | 0.33    | 0.31    | 0.40    | 0.42   | 0.27   | 0.37    | 0.42   | 0.33    | 0.47    |      | 0.41    | 0.49  | 0.47    | 0.51  | 0.40    |      | 0.45    |

|                        |         |         |      |         |         |         |      |      |         |      |         |         |         |      |         |      |         |         |
|------------------------|---------|---------|------|---------|---------|---------|------|------|---------|------|---------|---------|---------|------|---------|------|---------|---------|
| <b>J_C_rightconvex</b> | 0.52    | 0.47    | 1.00 | 0.50    | 0.48    | 0.53    | 0.55 | 0.85 | 0.47    | 0.82 | 0.12    | 0.55    | 0.56    | 0.61 | 0.44    | 0.35 | 0.00    | 0.50    |
| <b>P_turning</b>       | 0.04    | 0.01    | 0.06 | 0.00    | 0.01    | 0.01    | 0.03 | 0.25 | 0.03    | 0.03 | 0.12    | 0.00    | 0.01    | 0.03 | 0.01    | 0.00 | 0.01    | 0.06    |
| <b>final_structure</b> | neither | neither | U    | neither | neither | neither | U    | U    | neither | U    | neither | neither | neither | U    | neither | U    | neither | neither |
| <b>U_supported</b>     | False   | 0.00    | 1.00 | 0.00    | 0.00    | 0.00    | 1.00 | 1.00 | 0.00    | 1.00 | 0.00    | 0.00    | 0.00    | 1.00 | 0.00    | 1.00 | 0.00    | 0.00    |
| <b>J_supported</b>     | False   | 0.00    | 0.00 | 0.00    | 0.00    | 0.00    | 0.00 | 0.00 | 0.00    | 0.00 | 0.00    | 0.00    | 0.00    | 0.00 | 0.00    | 0.00 | 0.00    | 0.00    |

Table S6ax. Ghana Cantril U-shape ratings, 2006-2024

| KPI                       | Mean    | 2005 | 2006    | 2007 | 2008 | 2009 | 2010    | 2011 | 2012 | 2013 | 2014 | 2015 | 2016 | 2017 | 2018 | 2019 | 2020 | 2021 | 2022    | 2023 | 2024 |
|---------------------------|---------|------|---------|------|------|------|---------|------|------|------|------|------|------|------|------|------|------|------|---------|------|------|
| <b>shape_class</b>        | neither |      | neither |      |      |      | neither |      |      |      |      |      |      |      |      |      |      |      | neither |      |      |
| <b>U_beauty</b>           | 0.00    |      | 0.00    |      |      |      | 0.00    |      |      |      |      |      |      |      |      |      |      |      | 0.00    |      |      |
| <b>J_beauty</b>           | 0.00    |      | 0.00    |      |      |      | 0.00    |      |      |      |      |      |      |      |      |      |      |      | 0.00    |      |      |
| <b>Dominance</b>          |         |      |         |      |      |      |         |      |      |      |      |      |      |      |      |      |      |      |         |      |      |
| <b>best_df</b>            | 4.67    |      | 5.00    |      |      |      | 5.00    |      |      |      |      |      |      |      |      |      |      |      | 4.00    |      |      |
| <b>p_value</b>            | 0.02    |      | 0.06    |      |      |      | 0.00    |      |      |      |      |      |      |      |      |      |      |      | 0.00    |      |      |
| <b>lr_stat</b>            | 27.51   |      | 16.30   |      |      |      | 26.72   |      |      |      |      |      |      |      |      |      |      |      | 39.51   |      |      |
| <b>linear_aic</b>         | 37.31   |      | 29.55   |      |      |      | 39.03   |      |      |      |      |      |      |      |      |      |      |      | 43.35   |      |      |
| <b>spline_aic</b>         | 27.13   |      | 31.25   |      |      |      | 30.31   |      |      |      |      |      |      |      |      |      |      |      | 19.84   |      |      |
| <b>min_age</b>            | 90.87   |      | 90.87   |      |      |      |         |      |      |      |      |      |      |      |      |      |      |      |         |      |      |
| <b>min_value</b>          | 3.86    |      | 3.86    |      |      |      |         |      |      |      |      |      |      |      |      |      |      |      |         |      |      |
| <b>amplitude</b>          | 3.02    |      | 1.96    |      |      |      | 3.20    |      |      |      |      |      |      |      |      |      |      |      | 3.92    |      |      |
| <b>delta_endpoints</b>    | -2.65   |      | -1.08   |      |      |      | -3.01   |      |      |      |      |      |      |      |      |      |      |      | -3.84   |      |      |
| <b>n_minima</b>           | 3.33    |      | 4.00    |      |      |      | 3.00    |      |      |      |      |      |      |      |      |      |      |      | 3.00    |      |      |
| <b>n_maxima</b>           | 3.00    |      | 3.00    |      |      |      | 3.00    |      |      |      |      |      |      |      |      |      |      |      | 3.00    |      |      |
| <b>turning_points</b>     | 6.33    |      | 7.00    |      |      |      | 6.00    |      |      |      |      |      |      |      |      |      |      |      | 6.00    |      |      |
| <b>r_trough</b>           | 0.99    |      | 0.98    |      |      |      | 1.00    |      |      |      |      |      |      |      |      |      |      |      | 1.00    |      |      |
| <b>interior_indicator</b> | False   |      | 0.00    |      |      |      | 0.00    |      |      |      |      |      |      |      |      |      |      |      | 0.00    |      |      |
| <b>trough_indicator</b>   | False   |      | 1.00    |      |      |      | 0.00    |      |      |      |      |      |      |      |      |      |      |      | 0.00    |      |      |
| <b>U_D_depth</b>          | 0.02    |      | 0.06    |      |      |      | 0.00    |      |      |      |      |      |      |      |      |      |      |      | 0.00    |      |      |
| <b>U_I_interiority</b>    | 0.00    |      | 0.00    |      |      |      | 0.00    |      |      |      |      |      |      |      |      |      |      |      | 0.00    |      |      |
| <b>U_M_monotonicity</b>   | 0.28    |      | 0.83    |      |      |      | 0.00    |      |      |      |      |      |      |      |      |      |      |      | 0.00    |      |      |
| <b>U_C_convexity</b>      | 0.22    |      | 0.65    |      |      |      | 0.00    |      |      |      |      |      |      |      |      |      |      |      | 0.00    |      |      |
| <b>U_S_symmetry</b>       | 0.06    |      | 0.18    |      |      |      | 0.00    |      |      |      |      |      |      |      |      |      |      |      | 0.00    |      |      |
| <b>J_R_rise</b>           | 0.00    |      | 0.00    |      |      |      | 0.00    |      |      |      |      |      |      |      |      |      |      |      | 0.00    |      |      |
| <b>J_M_monotonicity</b>   | 0.40    |      | 0.32    |      |      |      | 0.48    |      |      |      |      |      |      |      |      |      |      |      | 0.41    |      |      |
| <b>J_C_rightconvex</b>    | 0.48    |      | 0.51    |      |      |      | 0.42    |      |      |      |      |      |      |      |      |      |      |      | 0.52    |      |      |
| <b>P_turning</b>          | 0.03    |      | 0.01    |      |      |      | 0.03    |      |      |      |      |      |      |      |      |      |      |      | 0.03    |      |      |
| <b>final_structure</b>    | neither |      | neither |      |      |      | neither |      |      |      |      |      |      |      |      |      |      |      | neither |      |      |
| <b>U_supported</b>        | False   |      | 0.00    |      |      |      | 0.00    |      |      |      |      |      |      |      |      |      |      |      | 0.00    |      |      |
| <b>J_supported</b>        | False   |      | 0.00    |      |      |      | 0.00    |      |      |      |      |      |      |      |      |      |      |      | 0.00    |      |      |

Table S6ay. Greece Cantril U-shape ratings, 2006-2024

| KPI                | Mean    | 2005    | 2006 | 2007 | 2008 | 2009    | 2010    | 2011  | 2012    | 2013    | 2014    | 2015    | 2016  | 2017    | 2018 | 2019    | 2020 | 2021    | 2022    | 2023    | 2024 |
|--------------------|---------|---------|------|------|------|---------|---------|-------|---------|---------|---------|---------|-------|---------|------|---------|------|---------|---------|---------|------|
| shape_class        | neither | neither |      |      |      | neither | neither | U     | neither | neither | neither | neither | U     | neither |      | neither |      | neither | neither | neither |      |
| U_beauty           | 0.04    | 0.00    |      |      |      | 0.00    | 0.00    | 0.01  | 0.00    | 0.00    | 0.00    | 0.00    | 0.49  | 0.00    |      | 0.00    |      | 0.00    | 0.00    | 0.00    |      |
| J_beauty           | 0.00    | 0.00    |      |      |      | 0.00    | 0.00    | 0.02  | 0.00    | 0.00    | 0.00    | 0.00    | 0.00  | 0.00    |      | 0.00    |      | 0.00    | 0.00    | 0.00    |      |
| Dominance          | -0.08   | -1.00   |      |      |      |         |         | -0.25 |         |         |         |         | 1.00  |         |      |         |      |         |         |         |      |
| best_df            | 3.79    | 5.00    |      |      |      | 4.00    | 3.00    | 3.00  | 3.00    | 5.00    | 4.00    | 3.00    | 4.00  | 5.00    |      | 3.00    |      | 3.00    | 3.00    | 5.00    |      |
| p_value            | 0.01    | 0.01    |      |      |      | 0.00    | 0.02    | 0.00  | 0.00    | 0.00    | 0.00    | 0.00    | 0.00  | 0.00    |      | 0.14    |      | 0.00    | 0.00    | 0.00    |      |
| lr_stat            | 34.80   | 20.90   |      |      |      | 56.58   | 16.98   | 66.48 | 29.74   | 36.83   | 46.88   | 20.43   | 46.46 | 27.75   |      | 11.08   |      | 47.30   | 22.68   | 37.08   |      |
| linear_aic         | 22.68   | 31.50   |      |      |      | 32.01   | 16.43   | 55.78 | 17.31   | 18.32   | 25.11   | 15.97   | 30.98 | 10.77   |      | 9.72    |      | 21.65   | 1.20    | 30.72   |      |
| spline_aic         | 3.45    | 28.59   |      |      |      | -8.57   | 13.45   | 3.30  | 1.57    | -0.51   | -5.77   | 9.54    | 0.52  | 1.02    |      | 12.64   |      | -11.66  | -7.47   | 11.64   |      |
| min_age            | 83.94   | 87.68   |      |      |      |         |         | 82.60 |         | 87.49   | 90.68   | 84.86   | 63.05 | 88.05   |      | 87.11   |      |         |         |         |      |
| min_value          | 4.16    | 4.46    |      |      |      |         |         | 4.85  |         | 3.55    | 3.20    | 4.77    | 4.58  | 3.48    |      | 4.44    |      |         |         |         |      |
| amplitude          | 2.99    | 2.52    |      |      |      | 4.58    | 2.34    | 5.15  | 2.73    | 2.61    | 3.73    | 2.15    | 2.05  | 3.17    |      | 2.54    |      | 2.15    | 3.44    | 2.75    |      |
| delta_endpoints    | -1.65   | 0.24    |      |      |      | -4.58   | -2.34   | 3.33  | -2.55   | -1.41   | -3.67   | -1.50   | -0.03 | -2.08   |      | -1.71   |      | -1.61   | -3.44   | -1.81   |      |
| n_minima           | 2.71    | 4.00    |      |      |      | 2.00    | 2.00    | 2.00  | 2.00    | 5.00    | 3.00    | 2.00    | 4.00  | 4.00    |      | 2.00    |      | 3.00    | 1.00    | 2.00    |      |
| n_maxima           | 2.36    | 3.00    |      |      |      | 2.00    | 2.00    | 1.00  | 3.00    | 4.00    | 2.00    | 1.00    | 3.00  | 3.00    |      | 1.00    |      | 4.00    | 1.00    | 3.00    |      |
| turning_points     | 5.07    | 7.00    |      |      |      | 4.00    | 4.00    | 3.00  | 5.00    | 9.00    | 5.00    | 3.00    | 7.00  | 7.00    |      | 3.00    |      | 7.00    | 2.00    | 5.00    |      |
| r_trough           | 0.94    | 0.94    |      |      |      | 1.00    | 1.00    | 0.87  | 1.00    | 0.94    | 0.98    | 0.90    | 0.61  | 0.95    |      | 0.93    |      | 1.00    | 1.00    | 1.00    |      |
| interior_indicator | False   | 0.00    |      |      |      | 0.00    | 0.00    | 1.00  | 0.00    | 0.00    | 0.00    | 0.00    | 1.00  | 0.00    |      | 0.00    |      | 0.00    | 0.00    | 0.00    |      |
| trough_indicator   | True    | 1.00    |      |      |      | 0.00    | 0.00    | 1.00  | 0.00    | 1.00    | 1.00    | 1.00    | 1.00  | 1.00    |      | 1.00    |      | 0.00    | 0.00    | 0.00    |      |
| U_D_depth          | 0.26    | 0.90    |      |      |      | 0.00    | 0.00    | 0.35  | 0.00    | 0.46    | 0.02    | 0.31    | 0.98  | 0.34    |      | 0.33    |      | 0.00    | 0.00    | 0.00    |      |
| U_I_interiority    | 0.06    | 0.00    |      |      |      | 0.00    | 0.00    | 0.06  | 0.00    | 0.00    | 0.00    | 0.00    | 0.71  | 0.00    |      | 0.00    |      | 0.00    | 0.00    | 0.00    |      |
| U_M_monotonicity   | 0.50    | 0.80    |      |      |      | 0.00    | 0.00    | 0.91  | 0.00    | 0.80    | 0.88    | 0.95    | 0.80  | 0.88    |      | 0.94    |      | 0.00    | 0.00    | 0.00    |      |
| U_C_convexity      | 0.45    | 0.65    |      |      |      | 0.00    | 0.00    | 0.66  | 0.00    | 0.66    | 0.81    | 0.82    | 0.96  | 0.67    |      | 0.80    |      | 0.00    | 0.00    | 0.30    |      |
| U_S_symmetry       | 0.33    | 0.95    |      |      |      | 0.00    | 0.00    | 0.52  | 0.00    | 0.63    | 0.03    | 0.47    | 0.99  | 0.51    |      | 0.49    |      | 0.00    | 0.00    | 0.00    |      |
| J_R_rise           | 0.05    | 0.10    |      |      |      | 0.00    | 0.00    | 0.65  | 0.00    | 0.00    | 0.00    | 0.00    | 0.00  | 0.00    |      | 0.00    |      | 0.00    | 0.00    | 0.00    |      |
| J_M_monotonicity   | 0.30    | 0.40    |      |      |      | 0.16    | 0.46    | 0.27  | 0.35    | 0.39    | 0.24    | 0.18    | 0.39  | 0.26    |      | 0.17    |      | 0.49    | 0.10    | 0.40    |      |
| J_C_rightconvex    | 0.43    | 0.54    |      |      |      | 0.09    | 0.40    | 0.63  | 0.00    | 0.61    | 0.38    | 0.64    | 0.52  | 0.50    |      | 0.53    |      | 0.43    | 0.45    | 0.26    |      |
| P_turning          | 0.12    | 0.01    |      |      |      | 0.12    | 0.12    | 0.25  | 0.06    | 0.00    | 0.06    | 0.25    | 0.01  | 0.01    |      | 0.25    |      | 0.01    | 0.50    | 0.06    |      |
| final_structure    | neither | neither |      |      |      | neither | neither | U     | neither | neither | neither | neither | U     | neither |      | neither |      | neither | neither | neither |      |
| U_supported        | False   | 0.00    |      |      |      | 0.00    | 0.00    | 1.00  | 0.00    | 0.00    | 0.00    | 0.00    | 1.00  | 0.00    |      | 0.00    |      | 0.00    | 0.00    | 0.00    |      |
| J_supported        | False   | 0.00    |      |      |      | 0.00    | 0.00    | 0.00  | 0.00    | 0.00    | 0.00    | 0.00    | 0.00  | 0.00    |      | 0.00    |      | 0.00    | 0.00    | 0.00    |      |

Table S6az. Guatemala Cantril U-shape ratings, 2006-2024

| KPI         | Mean    | 2005 | 2006    | 2007 | 2008    | 2009 | 2010    | 2011    | 2012 | 2013 | 2014 | 2015    | 2016    | 2017 | 2018 | 2019 | 2020 | 2021 | 2022    | 2023    | 2024    |
|-------------|---------|------|---------|------|---------|------|---------|---------|------|------|------|---------|---------|------|------|------|------|------|---------|---------|---------|
| shape_class | neither |      | neither | U    | neither | U    | neither | neither | U    |      |      | neither | neither | U    |      |      |      |      | neither | neither | neither |
| U_beauty    | 0.01    |      | 0.00    | 0.01 | 0.00    | 0.03 | 0.00    | 0.00    | 0.01 |      |      | 0.00    | 0.00    | 0.07 |      |      |      |      | 0.00    | 0.00    | 0.00    |
| J_beauty    | 0.00    |      | 0.00    | 0.00 | 0.00    | 0.00 | 0.00    | 0.00    | 0.00 |      |      | 0.00    | 0.03    | 0.00 |      |      |      |      | 0.00    | 0.00    | 0.00    |
| Dominance   | 0.33    |      | -1.00   | 1.00 |         | 1.00 |         |         | 1.00 |      |      |         | -1.00   | 0.98 |      |      |      |      |         |         |         |
| best_df     | 3.92    |      | 5.00    | 5.00 | 4.00    | 5.00 | 3.00    | 3.00    | 4.00 |      |      | 3.00    | 3.00    | 5.00 |      |      |      |      | 4.00    | 3.00    | 4.00    |
| p_value     | 0.02    |      | 0.00    | 0.00 | 0.00    | 0.00 | 0.20    | 0.00    | 0.05 |      |      | 0.00    | 0.00    | 0.00 |      |      |      |      | 0.00    | 0.00    | 0.00    |

|                           |         |         |       |         |        |         |         |       |  |         |         |       |  |  |  |  |  |  |  |         |         |         |
|---------------------------|---------|---------|-------|---------|--------|---------|---------|-------|--|---------|---------|-------|--|--|--|--|--|--|--|---------|---------|---------|
| <b>lr_stat</b>            | 37.88   | 38.09   | 26.00 | 30.11   | 63.12  | 9.72    | 21.41   | 15.25 |  | 30.70   | 66.94   | 31.59 |  |  |  |  |  |  |  | 38.82   | 55.33   | 65.37   |
| <b>linear_aic</b>         | 41.38   | 31.19   | 39.46 | 18.82   | 32.76  | 26.70   | 32.04   | 12.41 |  | 60.12   | 56.18   | 56.42 |  |  |  |  |  |  |  | 46.98   | 61.92   | 62.92   |
| <b>spline_aic</b>         | 19.34   | 11.09   | 31.46 | 4.71    | -12.36 | 30.98   | 24.62   | 13.16 |  | 43.42   | 3.24    | 42.84 |  |  |  |  |  |  |  | 24.15   | 20.59   | 13.55   |
| <b>min_age</b>            | 76.49   | 87.49   | 78.28 |         | 65.50  |         |         | 71.32 |  |         | 84.86   | 71.51 |  |  |  |  |  |  |  |         |         |         |
| <b>min_value</b>          | 4.83    | 4.45    | 5.68  |         | 5.14   |         |         | 4.85  |  |         | 4.04    | 4.85  |  |  |  |  |  |  |  |         |         |         |
| <b>amplitude</b>          | 4.28    | 2.56    | 3.34  | 2.62    | 2.41   | 1.80    | 3.46    | 1.60  |  | 7.03    | 5.99    | 5.13  |  |  |  |  |  |  |  | 4.66    | 7.70    | 7.33    |
| <b>delta_endpoints</b>    | -2.43   | 0.42    | -0.69 | -2.62   | -1.65  | -1.80   | -3.46   | -1.44 |  | -7.03   | 2.56    | 2.83  |  |  |  |  |  |  |  | -4.57   | -6.87   | -7.32   |
| <b>n_minima</b>           | 2.92    | 4.00    | 4.00  | 3.00    | 4.00   | 1.00    | 3.00    | 3.00  |  | 2.00    | 2.00    | 5.00  |  |  |  |  |  |  |  | 3.00    | 3.00    | 1.00    |
| <b>n_maxima</b>           | 2.77    | 3.00    | 4.00  | 3.00    | 4.00   | 1.00    | 4.00    | 3.00  |  | 2.00    | 1.00    | 4.00  |  |  |  |  |  |  |  | 3.00    | 3.00    | 1.00    |
| <b>turning_points</b>     | 5.69    | 7.00    | 8.00  | 6.00    | 8.00   | 2.00    | 7.00    | 6.00  |  | 4.00    | 3.00    | 9.00  |  |  |  |  |  |  |  | 6.00    | 6.00    | 2.00    |
| <b>r_trough</b>           | 0.90    | 0.94    | 0.82  | 1.00    | 0.65   | 1.00    | 1.00    | 0.72  |  | 1.00    | 0.90    | 0.73  |  |  |  |  |  |  |  | 1.00    | 1.00    | 1.00    |
| <b>interior_indicator</b> | False   | 0.00    | 1.00  | 0.00    | 1.00   | 0.00    | 0.00    | 1.00  |  | 0.00    | 0.00    | 1.00  |  |  |  |  |  |  |  | 0.00    | 0.00    | 0.00    |
| <b>trough_indicator</b>   | False   | 1.00    | 1.00  | 0.00    | 1.00   | 0.00    | 0.00    | 1.00  |  | 0.00    | 1.00    | 1.00  |  |  |  |  |  |  |  | 0.00    | 0.00    | 0.00    |
| <b>U_D_depth</b>          | 0.17    | 0.83    | 0.10  | 0.00    | 0.15   | 0.00    | 0.00    | 0.10  |  | 0.00    | 0.57    | 0.45  |  |  |  |  |  |  |  | 0.00    | 0.00    | 0.00    |
| <b>U_I_interiority</b>    | 0.13    | 0.00    | 0.21  | 0.00    | 0.63   | 0.00    | 0.00    | 0.44  |  | 0.00    | 0.00    | 0.43  |  |  |  |  |  |  |  | 0.00    | 0.00    | 0.00    |
| <b>U_M_monotonicity</b>   | 0.33    | 0.86    | 0.63  | 0.00    | 0.81   | 0.00    | 0.00    | 0.57  |  | 0.00    | 0.79    | 0.67  |  |  |  |  |  |  |  | 0.00    | 0.00    | 0.00    |
| <b>U_C_convexity</b>      | 0.32    | 0.64    | 0.63  | 0.00    | 0.73   | 0.00    | 0.00    | 0.80  |  | 0.00    | 0.77    | 0.63  |  |  |  |  |  |  |  | 0.00    | 0.00    | 0.00    |
| <b>U_S_symmetry</b>       | 0.25    | 0.91    | 0.50  | 0.00    | 0.30   | 0.00    | 0.00    | 0.18  |  | 0.00    | 0.73    | 0.62  |  |  |  |  |  |  |  | 0.00    | 0.00    | 0.00    |
| <b>J_R_rise</b>           | 0.09    | 0.17    | 0.00  | 0.00    | 0.00   | 0.00    | 0.00    | 0.00  |  | 0.00    | 0.43    | 0.55  |  |  |  |  |  |  |  | 0.00    | 0.00    | 0.00    |
| <b>J_M_monotonicity</b>   | 0.40    | 0.31    | 0.49  | 0.30    | 0.40   | 0.37    | 0.39    | 0.42  |  | 0.36    | 0.44    | 0.47  |  |  |  |  |  |  |  | 0.38    | 0.42    | 0.51    |
| <b>J_C_rightconvex</b>    | 0.41    | 0.57    | 0.50  | 0.49    | 0.50   | 0.00    | 0.44    | 0.41  |  | 0.33    | 0.60    | 0.59  |  |  |  |  |  |  |  | 0.47    | 0.39    | 0.00    |
| <b>P_turning</b>          | 0.12    | 0.01    | 0.01  | 0.03    | 0.01   | 0.50    | 0.01    | 0.03  |  | 0.12    | 0.25    | 0.00  |  |  |  |  |  |  |  | 0.03    | 0.03    | 0.50    |
| <b>final_structure</b>    | neither | neither | U     | neither | U      | neither | neither | U     |  | neither | neither | U     |  |  |  |  |  |  |  | neither | neither | neither |
| <b>U_supported</b>        | False   | 0.00    | 1.00  | 0.00    | 1.00   | 0.00    | 0.00    | 1.00  |  | 0.00    | 0.00    | 1.00  |  |  |  |  |  |  |  | 0.00    | 0.00    | 0.00    |
| <b>J_supported</b>        | False   | 0.00    | 0.00  | 0.00    | 0.00   | 0.00    | 0.00    | 0.00  |  | 0.00    | 0.00    | 0.00  |  |  |  |  |  |  |  | 0.00    | 0.00    | 0.00    |

Table S6ba. Guinea Cantril U-shape ratings, 2006-2024

| KPI                    | Mean   | 2005 | 2006 | 2007 | 2008 | 2009 | 2010 | 2011    | 2012    | 2013  | 2014 | 2015 | 2016 | 2017 | 2018 | 2019 | 2020 | 2021 | 2022 | 2023 | 2024  |
|------------------------|--------|------|------|------|------|------|------|---------|---------|-------|------|------|------|------|------|------|------|------|------|------|-------|
| <b>shape_class</b>     | U      |      |      |      |      |      |      | neither | neither | U     |      |      |      |      |      |      |      |      |      |      | U     |
| <b>U_beauty</b>        | 0.01   |      |      |      |      |      |      | 0.00    | 0.00    | 0.04  |      |      |      |      |      |      |      |      |      |      | 0.02  |
| <b>J_beauty</b>        | 0.00   |      |      |      |      |      |      | 0.00    | 0.00    | 0.00  |      |      |      |      |      |      |      |      |      |      | 0.00  |
| <b>Dominance</b>       | 1.00   |      |      |      |      |      |      |         |         | 1.00  |      |      |      |      |      |      |      |      |      |      | 1.00  |
| <b>best_df</b>         | 4.75   |      |      |      |      |      |      | 4.00    | 5.00    | 5.00  |      |      |      |      |      |      |      |      |      |      | 5.00  |
| <b>p_value</b>         | 0.00   |      |      |      |      |      |      | 0.00    | 0.00    | 0.00  |      |      |      |      |      |      |      |      |      |      | 0.00  |
| <b>lr_stat</b>         | 52.61  |      |      |      |      |      |      | 47.01   | 65.17   | 34.52 |      |      |      |      |      |      |      |      |      |      | 63.74 |
| <b>linear_aic</b>      | 24.27  |      |      |      |      |      |      | 17.61   | 22.22   | 15.02 |      |      |      |      |      |      |      |      |      |      | 42.22 |
| <b>spline_aic</b>      | -10.84 |      |      |      |      |      |      | -13.40  | -24.95  | -1.51 |      |      |      |      |      |      |      |      |      |      | -3.51 |
| <b>min_age</b>         | 80.06  |      |      |      |      |      |      |         |         | 82.04 |      |      |      |      |      |      |      |      |      |      | 78.09 |
| <b>min_value</b>       | 2.77   |      |      |      |      |      |      |         |         | 2.67  |      |      |      |      |      |      |      |      |      |      | 2.87  |
| <b>amplitude</b>       | 2.32   |      |      |      |      |      |      | 1.73    | 2.02    | 1.51  |      |      |      |      |      |      |      |      |      |      | 4.02  |
| <b>delta_endpoints</b> | -0.67  |      |      |      |      |      |      | -0.96   | -0.64   | -0.13 |      |      |      |      |      |      |      |      |      |      | -0.96 |
| <b>n_minima</b>        | 3.50   |      |      |      |      |      |      | 3.00    | 3.00    | 4.00  |      |      |      |      |      |      |      |      |      |      | 4.00  |
| <b>n_maxima</b>        | 4.00   |      |      |      |      |      |      | 4.00    | 4.00    | 4.00  |      |      |      |      |      |      |      |      |      |      | 4.00  |
| <b>turning_points</b>  | 7.50   |      |      |      |      |      |      | 7.00    | 7.00    | 8.00  |      |      |      |      |      |      |      |      |      |      | 8.00  |



|                        |       |  |         |  |      |
|------------------------|-------|--|---------|--|------|
| <b>J_C_rightconvex</b> | 0.47  |  | 0.40    |  | 0.54 |
| <b>P_turning</b>       | 0.01  |  | 0.01    |  | 0.01 |
| <b>final_structure</b> | U     |  | neither |  | U    |
| <b>U_supported</b>     | False |  | 0.00    |  | 1.00 |
| <b>J_supported</b>     | False |  | 0.00    |  | 0.00 |

Table S6bc. Honduras Cantril U-shape ratings, 2006-2024

| KPI                       | Mean    | 2005 | 2006 | 2007    | 2008    | 2009 | 2010 | 2011    | 2012    | 2013 | 2014 | 2015 | 2016 | 2017    | 2018 | 2019 | 2020 | 2021 | 2022 | 2023    | 2024    | All |
|---------------------------|---------|------|------|---------|---------|------|------|---------|---------|------|------|------|------|---------|------|------|------|------|------|---------|---------|-----|
| <b>shape_class</b>        | neither |      |      | neither | neither |      |      | neither | neither |      |      |      |      | neither |      |      |      |      |      | neither | neither |     |
| <b>U_beauty</b>           | 0.00    |      |      | 0.00    | 0.00    |      |      | 0.00    | 0.00    |      |      |      |      | 0.00    |      |      |      |      |      | 0.00    | 0.00    |     |
| <b>J_beauty</b>           | 0.00    |      |      | 0.00    | 0.00    |      |      | 0.00    | 0.00    |      |      |      |      | 0.00    |      |      |      |      |      | 0.00    | 0.00    |     |
| <b>Dominance</b>          | -1.00   |      |      |         | -1.00   |      |      |         |         |      |      |      |      |         |      |      |      |      |      |         |         |     |
| <b>best_df</b>            | 4.14    |      |      | 5.00    | 3.00    |      |      | 3.00    | 5.00    |      |      |      |      | 5.00    |      |      |      |      |      | 5.00    | 3.00    |     |
| <b>p_value</b>            | 0.01    |      |      | 0.00    | 0.06    |      |      | 0.00    | 0.00    |      |      |      |      | 0.01    |      |      |      |      |      | 0.00    | 0.01    |     |
| <b>lr_stat</b>            | 31.21   |      |      | 33.39   | 13.78   |      |      | 50.98   | 31.83   |      |      |      |      | 21.51   |      |      |      |      |      | 49.19   | 17.77   |     |
| <b>linear_aic</b>         | 38.96   |      |      | 29.04   | 58.07   |      |      | 49.62   | 36.77   |      |      |      |      | 34.08   |      |      |      |      |      | 46.09   | 19.01   |     |
| <b>spline_aic</b>         | 24.03   |      |      | 13.65   | 58.29   |      |      | 12.63   | 22.94   |      |      |      |      | 30.58   |      |      |      |      |      | 14.90   | 15.24   |     |
| <b>min_age</b>            | 89.79   |      |      |         | 86.74   |      |      |         | 90.31   |      |      |      |      | 91.62   |      |      |      |      |      | 90.50   |         |     |
| <b>min_value</b>          | 1.94    |      |      |         | 2.54    |      |      |         | 0.63    |      |      |      |      | 2.99    |      |      |      |      |      | 1.59    |         |     |
| <b>amplitude</b>          | 4.22    |      |      | 3.22    | 4.69    |      |      | 5.93    | 4.75    |      |      |      |      | 3.61    |      |      |      |      |      | 5.26    | 2.09    |     |
| <b>delta_endpoints</b>    | -3.31   |      |      | -3.22   | 0.94    |      |      | -5.93   | -4.39   |      |      |      |      | -3.60   |      |      |      |      |      | -4.86   | -2.09   |     |
| <b>n_minima</b>           | 2.86    |      |      | 4.00    | 3.00    |      |      | 2.00    | 2.00    |      |      |      |      | 3.00    |      |      |      |      |      | 4.00    | 2.00    |     |
| <b>n_maxima</b>           | 2.43    |      |      | 4.00    | 2.00    |      |      | 2.00    | 1.00    |      |      |      |      | 2.00    |      |      |      |      |      | 4.00    | 2.00    |     |
| <b>turning_points</b>     | 5.29    |      |      | 8.00    | 5.00    |      |      | 4.00    | 3.00    |      |      |      |      | 5.00    |      |      |      |      |      | 8.00    | 4.00    |     |
| <b>r_trough</b>           | 0.98    |      |      | 1.00    | 0.93    |      |      | 1.00    | 0.98    |      |      |      |      | 0.99    |      |      |      |      |      | 0.98    | 1.00    |     |
| <b>interior_indicator</b> | False   |      |      | 0.00    | 0.00    |      |      | 0.00    | 0.00    |      |      |      |      | 0.00    |      |      |      |      |      | 0.00    | 0.00    |     |
| <b>trough_indicator</b>   | True    |      |      | 0.00    | 1.00    |      |      | 0.00    | 1.00    |      |      |      |      | 1.00    |      |      |      |      |      | 1.00    | 0.00    |     |
| <b>U_D_depth</b>          | 0.14    |      |      | 0.00    | 0.80    |      |      | 0.00    | 0.07    |      |      |      |      | 0.00    |      |      |      |      |      | 0.08    | 0.00    |     |
| <b>U_I_interiority</b>    | 0.00    |      |      | 0.00    | 0.00    |      |      | 0.00    | 0.00    |      |      |      |      | 0.00    |      |      |      |      |      | 0.00    | 0.00    |     |
| <b>U_M_monotonicity</b>   | 0.50    |      |      | 0.00    | 0.86    |      |      | 0.00    | 0.94    |      |      |      |      | 0.88    |      |      |      |      |      | 0.80    | 0.00    |     |
| <b>U_C_convexity</b>      | 0.41    |      |      | 0.00    | 0.78    |      |      | 0.00    | 0.71    |      |      |      |      | 0.71    |      |      |      |      |      | 0.69    | 0.00    |     |
| <b>U_S_symmetry</b>       | 0.17    |      |      | 0.00    | 0.89    |      |      | 0.00    | 0.14    |      |      |      |      | 0.01    |      |      |      |      |      | 0.14    | 0.00    |     |
| <b>J_R_rise</b>           | 0.03    |      |      | 0.00    | 0.20    |      |      | 0.00    | 0.00    |      |      |      |      | 0.00    |      |      |      |      |      | 0.00    | 0.00    |     |
| <b>J_M_monotonicity</b>   | 0.34    |      |      | 0.41    | 0.32    |      |      | 0.36    | 0.15    |      |      |      |      | 0.23    |      |      |      |      |      | 0.37    | 0.54    |     |
| <b>J_C_rightconvex</b>    | 0.45    |      |      | 0.37    | 0.53    |      |      | 0.44    | 0.47    |      |      |      |      | 0.47    |      |      |      |      |      | 0.49    | 0.38    |     |
| <b>P_turning</b>          | 0.09    |      |      | 0.01    | 0.06    |      |      | 0.12    | 0.25    |      |      |      |      | 0.06    |      |      |      |      |      | 0.01    | 0.12    |     |
| <b>final_structure</b>    | neither |      |      | neither | neither |      |      | neither | neither |      |      |      |      | neither |      |      |      |      |      | neither | neither |     |
| <b>U_supported</b>        | False   |      |      | 0.00    | 0.00    |      |      | 0.00    | 0.00    |      |      |      |      | 0.00    |      |      |      |      |      | 0.00    | 0.00    |     |
| <b>J_supported</b>        | False   |      |      | 0.00    | 0.00    |      |      | 0.00    | 0.00    |      |      |      |      | 0.00    |      |      |      |      |      | 0.00    | 0.00    |     |

Table S6bd. Hong Kong Cantril U-shape ratings, 2006-2024

| KPI                | Mean    | 2005 | 2006 | 2007 | 2008 | 2009 | 2010 | 2011    | 2012    | 2013 | 2014  | 2015 | 2016    | 2017    | 2018 | 2019    | 2020 | 2021    | 2022 | 2023    | 2024    |
|--------------------|---------|------|------|------|------|------|------|---------|---------|------|-------|------|---------|---------|------|---------|------|---------|------|---------|---------|
| shape_class        | neither |      |      |      |      |      |      | neither | neither |      | U     |      | neither | neither |      | neither |      | neither |      | neither | neither |
| U_beauty           | 0.02    |      |      |      |      |      |      | 0.00    | 0.00    |      | 0.15  |      | 0.00    | 0.00    |      | 0.00    |      | 0.00    |      | 0.00    | 0.00    |
| J_beauty           | 0.00    |      |      |      |      |      |      | 0.00    | 0.00    |      | 0.00  |      | 0.00    | 0.00    |      | 0.00    |      | 0.02    |      | 0.00    | 0.00    |
| Dominance          | -0.50   |      |      |      |      |      |      |         | -1.00   |      | 1.00  |      |         | -1.00   |      |         |      | -1.00   |      |         |         |
| best_df            | 4.33    |      |      |      |      |      |      | 5.00    | 5.00    |      | 3.00  |      | 5.00    | 5.00    |      | 5.00    |      | 3.00    |      | 3.00    | 5.00    |
| p_value            | 0.02    |      |      |      |      |      |      | 0.00    | 0.00    |      | 0.03  |      | 0.00    | 0.00    |      | 0.00    |      | 0.11    |      | 0.00    | 0.00    |
| lr_stat            | 43.20   |      |      |      |      |      |      | 29.64   | 49.09   |      | 15.55 |      | 39.86   | 52.15   |      | 86.92   |      | 11.73   |      | 53.70   | 50.21   |
| linear_aic         | 29.79   |      |      |      |      |      |      | 26.14   | 38.80   |      | 12.59 |      | 37.67   | 44.21   |      | 49.16   |      | 4.09    |      | 30.13   | 25.34   |
| spline_aic         | 3.26    |      |      |      |      |      |      | 14.50   | 7.71    |      | 11.04 |      | 15.82   | 10.06   |      | -19.75  |      | 6.36    |      | -9.56   | -6.87   |
| min_age            | 85.08   |      |      |      |      |      |      | 88.99   | 86.36   |      | 74.14 |      |         | 87.68   |      |         |      | 84.67   |      |         | 88.62   |
| min_value          | 4.21    |      |      |      |      |      |      | 3.45    | 4.53    |      | 5.02  |      |         | 3.71    |      |         |      | 5.15    |      |         | 3.40    |
| amplitude          | 3.01    |      |      |      |      |      |      | 2.77    | 3.14    |      | 0.99  |      | 3.42    | 4.29    |      | 5.40    |      | 0.89    |      | 3.56    | 2.63    |
| delta_endpoints    | -0.90   |      |      |      |      |      |      | -1.23   | 1.36    |      | -0.30 |      | -2.34   | 2.00    |      | -4.41   |      | 0.70    |      | -3.56   | -0.27   |
| n_minima           | 3.22    |      |      |      |      |      |      | 2.00    | 5.00    |      | 2.00  |      | 3.00    | 4.00    |      | 3.00    |      | 3.00    |      | 3.00    | 4.00    |
| n_maxima           | 2.89    |      |      |      |      |      |      | 1.00    | 4.00    |      | 3.00  |      | 3.00    | 3.00    |      | 3.00    |      | 2.00    |      | 3.00    | 4.00    |
| turning_points     | 6.11    |      |      |      |      |      |      | 3.00    | 9.00    |      | 5.00  |      | 6.00    | 7.00    |      | 6.00    |      | 5.00    |      | 6.00    | 8.00    |
| r_trough           | 0.94    |      |      |      |      |      |      | 0.96    | 0.92    |      | 0.76  |      | 1.00    | 0.94    |      | 1.00    |      | 0.90    |      | 1.00    | 0.95    |
| interior_indicator | False   |      |      |      |      |      |      | 0.00    | 0.00    |      | 1.00  |      | 0.00    | 0.00    |      | 0.00    |      | 0.00    |      | 0.00    | 0.00    |
| trough_indicator   | True    |      |      |      |      |      |      | 1.00    | 1.00    |      | 1.00  |      | 0.00    | 1.00    |      | 0.00    |      | 1.00    |      | 0.00    | 1.00    |
| U_D_depth          | 0.37    |      |      |      |      |      |      | 0.56    | 0.57    |      | 0.69  |      | 0.00    | 0.53    |      | 0.00    |      | 0.21    |      | 0.00    | 0.73    |
| U_I_interiority    | 0.04    |      |      |      |      |      |      | 0.00    | 0.00    |      | 0.35  |      | 0.00    | 0.00    |      | 0.00    |      | 0.00    |      | 0.00    | 0.00    |
| U_M_monotonicity   | 0.52    |      |      |      |      |      |      | 0.93    | 0.76    |      | 0.81  |      | 0.00    | 0.79    |      | 0.00    |      | 0.67    |      | 0.00    | 0.74    |
| U_C_convexity      | 0.50    |      |      |      |      |      |      | 0.66    | 0.61    |      | 0.89  |      | 0.00    | 0.65    |      | 0.00    |      | 0.80    |      | 0.18    | 0.67    |
| U_S_symmetry       | 0.47    |      |      |      |      |      |      | 0.71    | 0.72    |      | 0.82  |      | 0.00    | 0.70    |      | 0.00    |      | 0.35    |      | 0.00    | 0.93    |
| J_R_rise           | 0.19    |      |      |      |      |      |      | 0.00    | 0.43    |      | 0.00  |      | 0.00    | 0.47    |      | 0.00    |      | 0.79    |      | 0.00    | 0.00    |
| J_M_monotonicity   | 0.40    |      |      |      |      |      |      | 0.18    | 0.46    |      | 0.35  |      | 0.40    | 0.42    |      | 0.36    |      | 0.59    |      | 0.33    | 0.49    |
| J_C_rightconvex    | 0.50    |      |      |      |      |      |      | 0.52    | 0.63    |      | 0.50  |      | 0.56    | 0.56    |      | 0.46    |      | 0.63    |      | 0.07    | 0.54    |
| P_turning          | 0.05    |      |      |      |      |      |      | 0.25    | 0.00    |      | 0.06  |      | 0.03    | 0.01    |      | 0.03    |      | 0.06    |      | 0.03    | 0.01    |
| final_structure    | neither |      |      |      |      |      |      | neither | neither |      | U     |      | neither | neither |      | neither |      | neither |      | neither | neither |
| U_supported        | False   |      |      |      |      |      |      | 0.00    | 0.00    |      | 1.00  |      | 0.00    | 0.00    |      | 0.00    |      | 0.00    |      | 0.00    | 0.00    |
| J_supported        | False   |      |      |      |      |      |      | 0.00    | 0.00    |      | 0.00  |      | 0.00    | 0.00    |      | 0.00    |      | 0.00    |      | 0.00    | 0.00    |

Table S6be. Hungary Cantril U-shape ratings, 2006-2024

| KPI         | Mean | 2005 | 2006 | 2007 | 2008 | 2009    | 2010    | 2011    | 2012 | 2013 | 2014    | 2015 | 2016 | 2017 | 2018 | 2019    | 2020    | 2021 | 2022 | 2023    | 2024    |
|-------------|------|------|------|------|------|---------|---------|---------|------|------|---------|------|------|------|------|---------|---------|------|------|---------|---------|
| shape_class | U    | U    |      | U    |      | neither | neither | neither | U    | U    | neither | U    | U    | U    | U    | neither | neither | U    | U    | neither | neither |
| U_beauty    | 0.10 | 0.75 |      | 0.13 |      | 0.00    | 0.00    | 0.00    | 0.28 | 0.01 | 0.00    | 0.06 | 0.11 | 0.22 | 0.00 | 0.00    | 0.00    | 0.26 | 0.01 | 0.00    | 0.00    |
| J_beauty    | 0.00 | 0.00 |      | 0.00 |      | 0.00    | 0.00    | 0.00    | 0.00 | 0.00 | 0.00    | 0.00 | 0.00 | 0.00 | 0.00 | 0.00    | 0.00    | 0.00 | 0.00 | 0.00    | 0.00    |
| Dominance   | 0.66 | 1.00 |      | 1.00 |      | -1.00   |         |         | 1.00 | 1.00 | -1.00   | 0.91 | 1.00 | 0.97 | 1.00 |         |         | 1.00 | 1.00 |         |         |
| best_df     | 4.56 | 3.00 |      | 5.00 |      | 5.00    | 5.00    | 5.00    | 4.00 | 4.00 | 5.00    | 5.00 | 5.00 | 4.00 | 5.00 | 4.00    | 5.00    | 5.00 | 5.00 | 5.00    | 3.00    |
| p_value     | 0.00 | 0.00 |      | 0.00 |      | 0.00    | 0.00    | 0.00    | 0.00 | 0.00 | 0.00    | 0.00 | 0.00 | 0.00 | 0.00 | 0.03    | 0.00    | 0.00 | 0.00 | 0.00    | 0.00    |

|                           |       |       |        |         |         |         |       |       |         |       |        |       |        |         |         |       |        |         |         |
|---------------------------|-------|-------|--------|---------|---------|---------|-------|-------|---------|-------|--------|-------|--------|---------|---------|-------|--------|---------|---------|
| <b>lr_stat</b>            | 45.30 | 45.19 | 61.18  | 71.03   | 58.26   | 29.46   | 30.15 | 37.74 | 64.16   | 29.65 | 56.90  | 40.04 | 56.62  | 17.53   | 53.91   | 51.47 | 55.10  | 26.38   | 30.58   |
| <b>linear_aic</b>         | 24.98 | 40.90 | 23.78  | 45.58   | 30.52   | 9.93    | 26.10 | 27.21 | 43.80   | 25.35 | 25.62  | 20.71 | 16.54  | 18.96   | 26.05   | 34.21 | 5.26   | 6.77    | 22.32   |
| <b>spline_aic</b>         | -3.21 | 9.70  | -19.40 | -7.45   | -9.74   | -1.53   | 11.95 | 5.47  | -2.36   | 13.69 | -13.28 | -3.33 | -22.07 | 17.43   | -9.86   | 0.74  | -31.85 | -1.61   | 5.75    |
| <b>min_age</b>            | 76.27 | 62.11 | 46.32  | 85.80   | 87.11   |         | 51.02 | 81.47 | 85.80   | 80.53 | 77.15  | 70.38 | 79.97  | 86.74   | 87.30   | 68.88 | 80.35  | 89.37   |         |
| <b>min_value</b>          | 4.66  | 4.76  | 4.18   | 4.33    | 3.61    |         | 4.32  | 4.36  | 4.12    | 4.70  | 4.60   | 5.38  | 4.95   | 4.07    | 4.81    | 5.50  | 5.33   | 5.53    |         |
| <b>amplitude</b>          | 2.49  | 2.26  | 2.22   | 3.67    | 3.11    | 2.13    | 1.58  | 2.40  | 3.88    | 1.80  | 1.87   | 1.63  | 2.56   | 3.56    | 2.76    | 2.49  | 2.17   | 1.85    | 2.89    |
| <b>delta_endpoints</b>    | -0.74 | 0.00  | -1.41  | 1.60    | -1.39   | -2.03   | 0.41  | -1.74 | 1.91    | 0.40  | -0.47  | 0.41  | -2.52  | -2.32   | -0.57   | 0.43  | -1.67  | -1.71   | -2.60   |
| <b>n_minima</b>           | 3.11  | 1.00  | 3.00   | 3.00    | 4.00    | 4.00    | 4.00  | 3.00  | 4.00    | 3.00  | 3.00   | 3.00  | 3.00   | 2.00    | 2.00    | 4.00  | 3.00   | 5.00    | 2.00    |
| <b>n_maxima</b>           | 2.61  | 0.00  | 2.00   | 2.00    | 3.00    | 4.00    | 4.00  | 3.00  | 4.00    | 2.00  | 3.00   | 2.00  | 3.00   | 1.00    | 1.00    | 3.00  | 3.00   | 4.00    | 3.00    |
| <b>turning_points</b>     | 5.72  | 1.00  | 5.00   | 5.00    | 7.00    | 8.00    | 8.00  | 6.00  | 8.00    | 5.00  | 6.00   | 5.00  | 6.00   | 3.00    | 3.00    | 7.00  | 6.00   | 9.00    | 5.00    |
| <b>r_trough</b>           | 0.81  | 0.60  | 0.39   | 0.92    | 0.93    | 1.00    | 0.45  | 0.86  | 0.92    | 0.85  | 0.80   | 0.71  | 0.84   | 0.93    | 0.94    | 0.69  | 0.84   | 0.96    | 1.00    |
| <b>interior_indicator</b> | True  | 1.00  | 1.00   | 0.00    | 0.00    | 0.00    | 1.00  | 1.00  | 0.00    | 1.00  | 1.00   | 1.00  | 1.00   | 0.00    | 0.00    | 1.00  | 1.00   | 0.00    | 0.00    |
| <b>trough_indicator</b>   | True  | 1.00  | 1.00   | 1.00    | 1.00    | 1.00    | 1.00  | 1.00  | 1.00    | 1.00  | 1.00   | 1.00  | 1.00   | 1.00    | 1.00    | 1.00  | 1.00   | 1.00    | 0.00    |
| <b>U_D_depth</b>          | 0.47  | 1.00  | 0.37   | 0.56    | 0.55    | 0.00    | 0.67  | 0.27  | 0.51    | 0.78  | 0.75   | 0.75  | 0.02   | 0.35    | 0.79    | 0.83  | 0.23   | 0.08    | 0.00    |
| <b>U_I_interiority</b>    | 0.23  | 0.75  | 0.73   | 0.00    | 0.00    | 0.00    | 0.88  | 0.10  | 0.00    | 0.13  | 0.24   | 0.47  | 0.15   | 0.00    | 0.00    | 0.52  | 0.14   | 0.00    | 0.00    |
| <b>U_M_monotonicity</b>   | 0.74  | 1.00  | 0.79   | 0.86    | 0.83    | 0.00    | 0.70  | 0.79  | 0.82    | 0.83  | 0.77   | 0.83  | 0.72   | 0.99    | 0.93    | 0.74  | 0.87   | 0.77    | 0.00    |
| <b>U_C_convexity</b>      | 0.69  | 1.00  | 0.91   | 0.63    | 0.64    | 0.00    | 0.78  | 0.90  | 0.66    | 0.72  | 0.96   | 0.82  | 0.58   | 0.75    | 0.66    | 0.97  | 0.73   | 0.69    | 0.00    |
| <b>U_S_symmetry</b>       | 0.58  | 1.00  | 0.54   | 0.72    | 0.71    | 0.00    | 0.84  | 0.43  | 0.67    | 0.88  | 0.86   | 0.86  | 0.04   | 0.52    | 0.89    | 0.91  | 0.38   | 0.14    | 0.00    |
| <b>J_R_rise</b>           | 0.10  | 0.00  | 0.00   | 0.44    | 0.00    | 0.00    | 0.26  | 0.00  | 0.49    | 0.22  | 0.00   | 0.25  | 0.00   | 0.00    | 0.00    | 0.17  | 0.00   | 0.00    | 0.00    |
| <b>J_M_monotonicity</b>   | 0.36  | 0.40  | 0.38   | 0.33    | 0.35    | 0.37    | 0.48  | 0.46  | 0.39    | 0.41  | 0.41   | 0.39  | 0.31   | 0.10    | 0.20    | 0.45  | 0.25   | 0.42    | 0.33    |
| <b>J_C_rightconvex</b>    | 0.55  | 1.00  | 0.55   | 0.57    | 0.60    | 0.20    | 0.57  | 0.81  | 0.48    | 0.57  | 0.61   | 0.63  | 0.46   | 0.51    | 0.50    | 0.57  | 0.58   | 0.53    | 0.18    |
| <b>P_turning</b>          | 0.11  | 1.00  | 0.06   | 0.06    | 0.01    | 0.01    | 0.01  | 0.03  | 0.01    | 0.06  | 0.03   | 0.06  | 0.03   | 0.25    | 0.25    | 0.01  | 0.03   | 0.00    | 0.06    |
| <b>final_structure</b>    | U     | U     | U      | neither | neither | neither | U     | U     | neither | U     | U      | U     | U      | neither | neither | U     | U      | neither | neither |
| <b>U_supported</b>        | True  | 1.00  | 1.00   | 0.00    | 0.00    | 0.00    | 1.00  | 1.00  | 0.00    | 1.00  | 1.00   | 1.00  | 1.00   | 0.00    | 0.00    | 1.00  | 1.00   | 0.00    | 0.00    |
| <b>J_supported</b>        | False | 0.00  | 0.00   | 0.00    | 0.00    | 0.00    | 0.00  | 0.00  | 0.00    | 0.00  | 0.00   | 0.00  | 0.00   | 0.00    | 0.00    | 0.00  | 0.00   | 0.00    | 0.00    |

Table S6bf. Iceland Cantril U-shape ratings, 2006-2024

| KPI                    | Mean  | 2005 | 2006 | 2007 | 2008 | 2009 | 2010 | 2011 | 2012    | 2013  | 2014 | 2015 | 2016    | 2017  | 2018 | 2019  | 2020    | 2021    | 2022  | 2023  | 2024  |
|------------------------|-------|------|------|------|------|------|------|------|---------|-------|------|------|---------|-------|------|-------|---------|---------|-------|-------|-------|
| <b>shape_class</b>     | U     |      |      |      |      |      |      | U    | neither |       |      |      | neither | U     |      | J     | neither | neither | U     | U     | J     |
| <b>U_beauty</b>        | 0.02  |      |      |      |      |      |      |      | 0.04    | 0.00  |      |      | 0.00    | 0.03  |      | 0.00  | 0.00    | 0.00    | 0.05  | 0.04  | 0.00  |
| <b>J_beauty</b>        | 0.00  |      |      |      |      |      |      |      | 0.00    | 0.00  |      |      | 0.00    | 0.00  |      | 0.00  | 0.00    | 0.00    | 0.03  | 0.00  | 0.00  |
| <b>Dominance</b>       | 0.03  |      |      |      |      |      |      |      | 1.00    | -1.00 |      |      |         | 1.00  |      | -1.00 |         |         | 0.22  | 0.99  | -1.00 |
| <b>best_df</b>         | 4.50  |      |      |      |      |      |      |      | 5.00    | 5.00  |      |      | 5.00    | 5.00  |      | 3.00  | 5.00    | 4.00    | 3.00  | 5.00  | 5.00  |
| <b>p_value</b>         | 0.02  |      |      |      |      |      |      |      | 0.06    | 0.00  |      |      | 0.00    | 0.07  |      | 0.02  | 0.00    | 0.00    | 0.01  | 0.00  | 0.00  |
| <b>lr_stat</b>         | 29.38 |      |      |      |      |      |      |      | 16.27   | 23.83 |      |      | 73.76   | 15.84 |      | 16.87 | 46.66   | 26.73   | 18.83 | 26.20 | 28.85 |
| <b>linear_aic</b>      | 21.90 |      |      |      |      |      |      |      | 11.85   | 24.06 |      |      | 45.88   | 24.08 |      | 22.43 | 29.11   | 13.81   | 16.83 | 19.12 | 11.79 |
| <b>spline_aic</b>      | 9.51  |      |      |      |      |      |      |      | 13.58   | 18.23 |      |      | -9.88   | 26.23 |      | 19.56 | 0.45    | 3.08    | 12.00 | 10.93 | 0.94  |
| <b>min_age</b>         | 48.20 |      |      |      |      |      |      |      | 80.35   | 87.68 |      |      |         | 26.40 |      | 87.30 |         | 22.26   | 32.04 | 28.47 | 21.14 |
| <b>min_value</b>       | 6.94  |      |      |      |      |      |      |      | 7.26    | 7.05  |      |      |         | 6.94  |      | 6.52  |         | 7.13    | 7.15  | 6.80  | 6.64  |
| <b>amplitude</b>       | 1.92  |      |      |      |      |      |      |      | 1.12    | 1.94  |      |      | 5.05    | 1.42  |      | 1.43  | 2.16    | 1.36    | 1.49  | 1.40  | 1.86  |
| <b>delta_endpoints</b> | -0.26 |      |      |      |      |      |      |      | -0.04   | 1.24  |      |      | -2.75   | -0.23 |      | 0.01  | -1.88   | -0.55   | 0.87  | 0.09  | 0.58  |
| <b>n_minima</b>        | 3.60  |      |      |      |      |      |      |      | 4.00    | 5.00  |      |      | 3.00    | 3.00  |      | 3.00  | 4.00    | 3.00    | 2.00  | 4.00  | 5.00  |
| <b>n_maxima</b>        | 3.40  |      |      |      |      |      |      |      | 4.00    | 4.00  |      |      | 3.00    | 3.00  |      | 2.00  | 5.00    | 3.00    | 2.00  | 4.00  | 4.00  |
| <b>turning_points</b>  | 7.00  |      |      |      |      |      |      |      | 8.00    | 9.00  |      |      | 6.00    | 6.00  |      | 5.00  | 9.00    | 6.00    | 4.00  | 8.00  | 9.00  |

|                           |       |  |      |         |  |         |      |  |      |         |         |      |      |      |
|---------------------------|-------|--|------|---------|--|---------|------|--|------|---------|---------|------|------|------|
| <b>r_trough</b>           | 0.53  |  | 0.84 | 0.94    |  | 1.00    | 0.13 |  | 0.94 | 1.00    | 0.07    | 0.20 | 0.15 | 0.06 |
| <b>interior_indicator</b> | False |  | 1.00 | 0.00    |  | 0.00    | 1.00 |  | 0.00 | 0.00    | 0.00    | 1.00 | 1.00 | 0.00 |
| <b>trough_indicator</b>   | True  |  | 1.00 | 1.00    |  | 0.00    | 1.00 |  | 1.00 | 0.00    | 1.00    | 1.00 | 1.00 | 1.00 |
| <b>U_D_depth</b>          | 0.45  |  | 0.67 | 0.36    |  | 0.00    | 0.76 |  | 0.64 | 0.00    | 0.15    | 0.41 | 0.79 | 0.69 |
| <b>U_I_interiority</b>    | 0.06  |  | 0.14 | 0.00    |  | 0.00    | 0.06 |  | 0.00 | 0.00    | 0.00    | 0.25 | 0.13 | 0.00 |
| <b>U_M_monotonicity</b>   | 0.59  |  | 0.70 | 0.72    |  | 0.00    | 0.82 |  | 0.63 | 0.00    | 0.76    | 0.74 | 0.67 | 0.82 |
| <b>U_C_convexity</b>      | 0.59  |  | 0.61 | 0.63    |  | 0.00    | 0.91 |  | 0.82 | 0.00    | 0.74    | 0.92 | 0.63 | 0.66 |
| <b>U_S_symmetry</b>       | 0.62  |  | 0.98 | 0.53    |  | 0.00    | 0.90 |  | 0.99 | 0.00    | 0.43    | 0.58 | 0.96 | 0.81 |
| <b>J_R_rise</b>           | 0.16  |  | 0.00 | 0.64    |  | 0.00    | 0.00 |  | 0.01 | 0.00    | 0.00    | 0.59 | 0.06 | 0.31 |
| <b>J_M_monotonicity</b>   | 0.53  |  | 0.43 | 0.52    |  | 0.42    | 0.59 |  | 0.63 | 0.45    | 0.54    | 0.59 | 0.50 | 0.63 |
| <b>J_C_rightconvex</b>    | 0.55  |  | 0.48 | 0.56    |  | 0.47    | 0.47 |  | 0.53 | 0.38    | 0.50    | 0.85 | 0.59 | 0.69 |
| <b>P_turning</b>          | 0.03  |  | 0.01 | 0.00    |  | 0.03    | 0.03 |  | 0.06 | 0.00    | 0.03    | 0.12 | 0.01 | 0.00 |
| <b>final_structure</b>    | U     |  | U    | neither |  | neither | U    |  | J    | neither | neither | U    | U    | J    |
| <b>U_supported</b>        | False |  | 1.00 | 0.00    |  | 0.00    | 1.00 |  | 0.00 | 0.00    | 0.00    | 1.00 | 1.00 | 0.00 |
| <b>J_supported</b>        | False |  | 0.00 | 0.00    |  | 0.00    | 0.00 |  | 1.00 | 0.00    | 0.00    | 0.00 | 0.00 | 1.00 |

Table S6bg. India Cantril U-shape ratings, 2006-2024

| KPI                       | Mean    | 2005 | 2006 | 2007 | 2008 | 2009 | 2010   | 2011  | 2012    | 2013    | 2014    | 2015    | 2016    | 2017   | 2018  | 2019 | 2020  | 2021    | 2022 | 2023  | 2024    |
|---------------------------|---------|------|------|------|------|------|--------|-------|---------|---------|---------|---------|---------|--------|-------|------|-------|---------|------|-------|---------|
| <b>shape_class</b>        | neither |      |      |      |      |      | U      | U     | neither | neither | neither | neither | neither | U      | U     |      | U     | neither |      | U     | neither |
| <b>U_beauty</b>           | 0.02    |      |      |      |      |      | 0.03   | 0.01  | 0.00    | 0.00    | 0.00    | 0.00    | 0.00    | 0.02   | 0.01  |      | 0.05  | 0.00    |      | 0.12  | 0.00    |
| <b>J_beauty</b>           | 0.00    |      |      |      |      |      | 0.00   | 0.00  | 0.00    | 0.00    | 0.00    | 0.00    | 0.00    | 0.00   | 0.00  |      | 0.01  | 0.00    |      | 0.01  | 0.00    |
| <b>Dominance</b>          | 0.39    |      |      |      |      |      | 0.87   | 0.67  |         |         |         |         | -1.00   | 1.00   | 1.00  |      | 0.78  |         |      | 0.78  | -1.00   |
| <b>best_df</b>            | 4.15    |      |      |      |      |      | 4.00   | 5.00  | 5.00    | 4.00    | 4.00    | 5.00    | 5.00    | 5.00   | 3.00  |      | 3.00  | 3.00    |      | 3.00  | 5.00    |
| <b>p_value</b>            | 0.06    |      |      |      |      |      | 0.00   | 0.00  | 0.00    | 0.00    | 0.16    | 0.00    | 0.00    | 0.00   | 0.59  |      | 0.00  | 0.04    |      | 0.01  | 0.00    |
| <b>lr_stat</b>            | 33.06   |      |      |      |      |      | 59.91  | 28.90 | 36.03   | 58.68   | 11.73   | 41.57   | 41.82   | 36.56  | 5.58  |      | 36.36 | 14.92   |      | 18.69 | 39.10   |
| <b>linear_aic</b>         | 16.33   |      |      |      |      |      | 29.39  | 1.54  | -22.67  | 24.30   | 4.06    | 47.74   | 16.15   | 3.81   | 8.33  |      | 35.21 | 8.59    |      | 25.40 | 30.47   |
| <b>spline_aic</b>         | -0.42   |      |      |      |      |      | -14.52 | -9.36 | -40.70  | -18.38  | 8.32    | 24.17   | -7.67   | -14.74 | 16.75 |      | 12.85 | 7.68    |      | 20.71 | 9.37    |
| <b>min_age</b>            | 78.69   |      |      |      |      |      | 70.01  | 72.45 |         |         | 90.87   |         | 85.61   | 80.16  | 77.34 |      | 66.06 | 88.80   |      | 67.38 | 88.24   |
| <b>min_value</b>          | 3.46    |      |      |      |      |      | 4.82   | 4.50  |         |         | 3.32    |         | 3.20    | 3.16   | 3.35  |      | 2.74  | 2.69    |      | 4.37  | 2.40    |
| <b>amplitude</b>          | 1.96    |      |      |      |      |      | 2.51   | 1.00  | 0.62    | 2.85    | 1.20    | 4.85    | 1.28    | 1.30   | 0.67  |      | 2.71  | 1.94    |      | 1.69  | 2.84    |
| <b>delta_endpoints</b>    | -0.35   |      |      |      |      |      | 2.00   | 0.85  | -0.51   | -2.65   | -1.06   | -4.61   | 0.41    | -0.38  | -0.37 |      | 2.08  | -1.58   |      | 1.03  | 0.19    |
| <b>n_minima</b>           | 3.31    |      |      |      |      |      | 4.00   | 4.00  | 2.00    | 2.00    | 4.00    | 4.00    | 4.00    | 3.00   | 3.00  |      | 3.00  | 3.00    |      | 3.00  | 4.00    |
| <b>n_maxima</b>           | 3.31    |      |      |      |      |      | 4.00   | 4.00  | 3.00    | 3.00    | 3.00    | 4.00    | 3.00    | 4.00   | 4.00  |      | 3.00  | 2.00    |      | 2.00  | 4.00    |
| <b>turning_points</b>     | 6.62    |      |      |      |      |      | 8.00   | 8.00  | 5.00    | 5.00    | 7.00    | 8.00    | 7.00    | 7.00   | 7.00  |      | 6.00  | 5.00    |      | 5.00  | 8.00    |
| <b>r_trough</b>           | 0.86    |      |      |      |      |      | 0.71   | 0.74  | 1.00    | 1.00    | 0.98    | 1.00    | 0.91    | 0.84   | 0.80  |      | 0.65  | 0.96    |      | 0.67  | 0.95    |
| <b>interior_indicator</b> | False   |      |      |      |      |      | 1.00   | 1.00  | 0.00    | 0.00    | 0.00    | 0.00    | 0.00    | 1.00   | 1.00  |      | 1.00  | 0.00    |      | 1.00  | 0.00    |
| <b>trough_indicator</b>   | True    |      |      |      |      |      | 1.00   | 1.00  | 0.00    | 0.00    | 1.00    | 0.00    | 1.00    | 1.00   | 1.00  |      | 1.00  | 1.00    |      | 1.00  | 1.00    |
| <b>U_D_depth</b>          | 0.23    |      |      |      |      |      | 0.20   | 0.14  | 0.00    | 0.00    | 0.02    | 0.00    | 0.56    | 0.34   | 0.13  |      | 0.23  | 0.18    |      | 0.39  | 0.84    |
| <b>U_I_interiority</b>    | 0.19    |      |      |      |      |      | 0.48   | 0.40  | 0.00    | 0.00    | 0.00    | 0.00    | 0.00    | 0.14   | 0.24  |      | 0.61  | 0.00    |      | 0.57  | 0.00    |
| <b>U_M_monotonicity</b>   | 0.57    |      |      |      |      |      | 0.66   | 0.62  | 0.00    | 0.00    | 0.76    | 0.00    | 0.82    | 0.70   | 0.63  |      | 0.75  | 0.86    |      | 0.82  | 0.72    |
| <b>U_C_convexity</b>      | 0.57    |      |      |      |      |      | 0.72   | 0.67  | 0.00    | 0.00    | 0.76    | 0.00    | 0.61    | 0.61   | 0.73  |      | 0.89  | 0.86    |      | 0.94  | 0.68    |
| <b>U_S_symmetry</b>       | 0.36    |      |      |      |      |      | 0.34   | 0.25  | 0.00    | 0.00    | 0.04    | 0.00    | 0.78    | 0.70   | 0.32  |      | 0.38  | 0.31    |      | 0.57  | 0.96    |
| <b>J_R_rise</b>           | 0.26    |      |      |      |      |      | 0.80   | 0.86  | 0.00    | 0.00    | 0.00    | 0.00    | 0.32    | 0.00   | 0.00  |      | 0.77  | 0.00    |      | 0.61  | 0.07    |
| <b>J_M_monotonicity</b>   | 0.43    |      |      |      |      |      | 0.50   | 0.55  | 0.31    | 0.30    | 0.43    | 0.44    | 0.38    | 0.38   | 0.47  |      | 0.47  | 0.29    |      | 0.55  | 0.51    |

|                        |         |  |      |      |         |         |         |         |         |      |      |      |      |         |      |         |
|------------------------|---------|--|------|------|---------|---------|---------|---------|---------|------|------|------|------|---------|------|---------|
| <b>J_C_rightconvex</b> | 0.56    |  | 0.57 | 0.57 | 0.50    | 0.48    | 0.44    | 0.43    | 0.71    | 0.48 | 0.50 |      | 0.63 | 0.49    | 1.00 | 0.50    |
| <b>P_turning</b>       | 0.03    |  | 0.01 | 0.01 | 0.06    | 0.06    | 0.01    | 0.01    | 0.01    | 0.01 | 0.01 |      | 0.03 | 0.06    | 0.06 | 0.01    |
| <b>final_structure</b> | neither |  | U    | U    | neither | neither | neither | neither | neither | U    | U    |      | U    | neither | U    | neither |
| <b>U_supported</b>     | False   |  | 1.00 | 1.00 | 0.00    | 0.00    | 0.00    | 0.00    | 0.00    | 0.00 | 1.00 | 1.00 | 1.00 | 0.00    | 1.00 | 0.00    |
| <b>J_supported</b>     | False   |  | 0.00 | 0.00 | 0.00    | 0.00    | 0.00    | 0.00    | 0.00    | 0.00 | 0.00 | 0.00 | 0.00 | 0.00    | 0.00 | 0.00    |

Table S6bh. Indonesia Cantril U-shape ratings, 2006-2024

| KPI                       | Mean    | 2005 | 2006 | 2007 | 2008 | 2009    | 2010 | 2011 | 2012   | 2013 | 2014 | 2015 | 2016 | 2017 | 2018 | 2019    | 2020 | 2021 | 2022 | 2023 | 2024 |
|---------------------------|---------|------|------|------|------|---------|------|------|--------|------|------|------|------|------|------|---------|------|------|------|------|------|
| <b>shape_class</b>        | neither |      |      |      |      | neither |      |      | U      |      |      |      |      |      |      | neither |      |      |      |      |      |
| <b>U_beauty</b>           | 0.00    |      |      |      |      | 0.00    |      |      | 0.01   |      |      |      |      |      |      | 0.00    |      |      |      |      |      |
| <b>J_beauty</b>           | 0.00    |      |      |      |      | 0.00    |      |      | 0.00   |      |      |      |      |      |      | 0.00    |      |      |      |      |      |
| <b>Dominance</b>          | 1.00    |      |      |      |      |         |      |      | 1.00   |      |      |      |      |      |      |         |      |      |      |      |      |
| <b>best_df</b>            | 3.67    |      |      |      |      | 5.00    |      |      | 3.00   |      |      |      |      |      |      | 3.00    |      |      |      |      |      |
| <b>p_value</b>            | 0.00    |      |      |      |      | 0.00    |      |      | 0.00   |      |      |      |      |      |      | 0.00    |      |      |      |      |      |
| <b>lr_stat</b>            | 32.01   |      |      |      |      | 24.23   |      |      | 47.32  |      |      |      |      |      |      | 24.50   |      |      |      |      |      |
| <b>linear_aic</b>         | 11.49   |      |      |      |      | -7.65   |      |      | 8.32   |      |      |      |      |      |      | 33.81   |      |      |      |      |      |
| <b>spline_aic</b>         | -5.19   |      |      |      |      | -13.88  |      |      | -25.00 |      |      |      |      |      |      | 23.32   |      |      |      |      |      |
| <b>min_age</b>            | 82.60   |      |      |      |      | 90.12   |      |      | 75.08  |      |      |      |      |      |      |         |      |      |      |      |      |
| <b>min_value</b>          | 4.92    |      |      |      |      | 4.97    |      |      | 4.87   |      |      |      |      |      |      |         |      |      |      |      |      |
| <b>amplitude</b>          | 1.77    |      |      |      |      | 1.04    |      |      | 1.21   |      |      |      |      |      |      | 3.06    |      |      |      |      |      |
| <b>delta_endpoints</b>    | -1.55   |      |      |      |      | -1.02   |      |      | -0.70  |      |      |      |      |      |      | -2.94   |      |      |      |      |      |
| <b>n_minima</b>           | 3.00    |      |      |      |      | 4.00    |      |      | 3.00   |      |      |      |      |      |      | 2.00    |      |      |      |      |      |
| <b>n_maxima</b>           | 3.00    |      |      |      |      | 3.00    |      |      | 3.00   |      |      |      |      |      |      | 3.00    |      |      |      |      |      |
| <b>turning_points</b>     | 6.00    |      |      |      |      | 7.00    |      |      | 6.00   |      |      |      |      |      |      | 5.00    |      |      |      |      |      |
| <b>r_trough</b>           | 0.92    |      |      |      |      | 0.97    |      |      | 0.77   |      |      |      |      |      |      | 1.00    |      |      |      |      |      |
| <b>interior_indicator</b> | False   |      |      |      |      | 0.00    |      |      | 1.00   |      |      |      |      |      |      | 0.00    |      |      |      |      |      |
| <b>trough_indicator</b>   | True    |      |      |      |      | 1.00    |      |      | 1.00   |      |      |      |      |      |      | 0.00    |      |      |      |      |      |
| <b>U_D_depth</b>          | 0.04    |      |      |      |      | 0.02    |      |      | 0.09   |      |      |      |      |      |      | 0.00    |      |      |      |      |      |
| <b>U_I_interiority</b>    | 0.10    |      |      |      |      | 0.00    |      |      | 0.31   |      |      |      |      |      |      | 0.00    |      |      |      |      |      |
| <b>U_M_monotonicity</b>   | 0.50    |      |      |      |      | 0.76    |      |      | 0.74   |      |      |      |      |      |      | 0.00    |      |      |      |      |      |
| <b>U_C_convexity</b>      | 0.55    |      |      |      |      | 0.80    |      |      | 0.84   |      |      |      |      |      |      | 0.00    |      |      |      |      |      |
| <b>U_S_symmetry</b>       | 0.10    |      |      |      |      | 0.05    |      |      | 0.24   |      |      |      |      |      |      | 0.00    |      |      |      |      |      |
| <b>J_R_rise</b>           | 0.00    |      |      |      |      | 0.00    |      |      | 0.00   |      |      |      |      |      |      | 0.00    |      |      |      |      |      |
| <b>J_M_monotonicity</b>   | 0.41    |      |      |      |      | 0.44    |      |      | 0.33   |      |      |      |      |      |      | 0.46    |      |      |      |      |      |
| <b>J_C_rightconvex</b>    | 0.41    |      |      |      |      | 0.40    |      |      | 0.47   |      |      |      |      |      |      | 0.37    |      |      |      |      |      |
| <b>P_turning</b>          | 0.04    |      |      |      |      | 0.01    |      |      | 0.03   |      |      |      |      |      |      | 0.06    |      |      |      |      |      |
| <b>final_structure</b>    | neither |      |      |      |      | neither |      |      | U      |      |      |      |      |      |      | neither |      |      |      |      |      |
| <b>U_supported</b>        | False   |      |      |      |      | 0.00    |      |      | 1.00   |      |      |      |      |      |      | 0.00    |      |      |      |      |      |
| <b>J_supported</b>        | False   |      |      |      |      | 0.00    |      |      | 0.00   |      |      |      |      |      |      | 0.00    |      |      |      |      |      |

Table S6bi. Iran Cantril U-shape ratings, 2006-2024

| KPI                | Mean  | 2005 | 2006 | 2007 | 2008 | 2009 | 2010 | 2011 | 2012 | 2013 | 2014 | 2015 | 2016 | 2017 | 2018 | 2019    | 2020 | 2021  | 2022    | 2023 | 2024  |
|--------------------|-------|------|------|------|------|------|------|------|------|------|------|------|------|------|------|---------|------|-------|---------|------|-------|
| shape_class        | U     |      |      |      |      |      |      |      |      |      |      |      |      |      |      | neither |      | U     | neither |      | U     |
| U_beauty           | 0.04  |      |      |      |      |      |      |      |      |      |      |      |      |      |      | 0.00    |      | 0.07  | 0.00    |      | 0.08  |
| J_beauty           | 0.00  |      |      |      |      |      |      |      |      |      |      |      |      |      |      | 0.00    |      | 0.00  | 0.00    |      | 0.02  |
| Dominance          | 0.83  |      |      |      |      |      |      |      |      |      |      |      |      |      |      |         |      | 1.00  |         |      | 0.66  |
| best_df            | 4.50  |      |      |      |      |      |      |      |      |      |      |      |      |      |      | 5.00    |      | 3.00  | 5.00    |      | 5.00  |
| p_value            | 0.00  |      |      |      |      |      |      |      |      |      |      |      |      |      |      | 0.00    |      | 0.00  | 0.00    |      | 0.00  |
| lr_stat            | 55.17 |      |      |      |      |      |      |      |      |      |      |      |      |      |      | 72.26   |      | 28.08 | 67.83   |      | 52.49 |
| linear_aic         | 42.10 |      |      |      |      |      |      |      |      |      |      |      |      |      |      | 47.21   |      | 30.83 | 38.26   |      | 52.11 |
| spline_aic         | 3.94  |      |      |      |      |      |      |      |      |      |      |      |      |      |      | -7.06   |      | 16.75 | -11.57  |      | 17.62 |
| min_age            | 65.50 |      |      |      |      |      |      |      |      |      |      |      |      |      |      |         |      | 76.21 |         |      | 54.78 |
| min_value          | 4.36  |      |      |      |      |      |      |      |      |      |      |      |      |      |      |         |      | 3.81  |         |      | 4.90  |
| amplitude          | 4.26  |      |      |      |      |      |      |      |      |      |      |      |      |      |      | 5.97    |      | 2.41  | 3.57    |      | 5.09  |
| delta_endpoints    | -1.55 |      |      |      |      |      |      |      |      |      |      |      |      |      |      | -5.97   |      | -0.62 | -3.50   |      | 3.90  |
| n_minima           | 2.25  |      |      |      |      |      |      |      |      |      |      |      |      |      |      | 1.00    |      | 2.00  | 3.00    |      | 3.00  |
| n_maxima           | 2.00  |      |      |      |      |      |      |      |      |      |      |      |      |      |      | 1.00    |      | 2.00  | 3.00    |      | 2.00  |
| turning_points     | 4.25  |      |      |      |      |      |      |      |      |      |      |      |      |      |      | 2.00    |      | 4.00  | 6.00    |      | 5.00  |
| r_trough           | 0.82  |      |      |      |      |      |      |      |      |      |      |      |      |      |      | 1.00    |      | 0.79  | 1.00    |      | 0.50  |
| interior_indicator | False |      |      |      |      |      |      |      |      |      |      |      |      |      |      | 0.00    |      | 1.00  | 0.00    |      | 1.00  |
| trough_indicator   | False |      |      |      |      |      |      |      |      |      |      |      |      |      |      | 0.00    |      | 1.00  | 0.00    |      | 1.00  |
| U_D_depth          | 0.18  |      |      |      |      |      |      |      |      |      |      |      |      |      |      | 0.00    |      | 0.48  | 0.00    |      | 0.23  |
| U_I_interiority    | 0.32  |      |      |      |      |      |      |      |      |      |      |      |      |      |      | 0.00    |      | 0.28  | 0.00    |      | 0.99  |
| U_M_monotonicity   | 0.38  |      |      |      |      |      |      |      |      |      |      |      |      |      |      | 0.00    |      | 0.75  | 0.00    |      | 0.76  |
| U_C_convexity      | 0.64  |      |      |      |      |      |      |      |      |      |      |      |      |      |      | 0.80    |      | 0.82  | 0.30    |      | 0.65  |
| U_S_symmetry       | 0.29  |      |      |      |      |      |      |      |      |      |      |      |      |      |      | 0.00    |      | 0.79  | 0.00    |      | 0.38  |
| J_R_rise           | 0.19  |      |      |      |      |      |      |      |      |      |      |      |      |      |      | 0.00    |      | 0.00  | 0.00    |      | 0.77  |
| J_M_monotonicity   | 0.35  |      |      |      |      |      |      |      |      |      |      |      |      |      |      | 0.16    |      | 0.35  | 0.39    |      | 0.52  |
| J_C_rightconvex    | 0.46  |      |      |      |      |      |      |      |      |      |      |      |      |      |      | 0.32    |      | 0.50  | 0.31    |      | 0.72  |
| P_turning          | 0.18  |      |      |      |      |      |      |      |      |      |      |      |      |      |      | 0.50    |      | 0.12  | 0.03    |      | 0.06  |
| final_structure    | U     |      |      |      |      |      |      |      |      |      |      |      |      |      |      | neither |      | U     | neither |      | U     |
| U_supported        | False |      |      |      |      |      |      |      |      |      |      |      |      |      |      | 0.00    |      | 1.00  | 0.00    |      | 1.00  |
| J_supported        | False |      |      |      |      |      |      |      |      |      |      |      |      |      |      | 0.00    |      | 0.00  | 0.00    |      | 0.00  |

Table S6bj. Ireland Cantril U-shape ratings, 2006-2024

| KPI         | Mean | 2005 | 2006 | 2007 | 2008    | 2009 | 2010 | 2011 | 2012 | 2013    | 2014 | 2015 | 2016    | 2017 | 2018 | 2019 | 2020 | 2021 | 2022 | 2023 | 2024 |
|-------------|------|------|------|------|---------|------|------|------|------|---------|------|------|---------|------|------|------|------|------|------|------|------|
| shape_class | U    |      |      |      | neither |      | U    |      |      | neither | U    |      | neither | U    |      |      |      | U    |      |      | U    |
| U_beauty    | 0.06 |      |      |      | 0.00    |      | 0.16 |      |      | 0.00    | 0.01 |      | 0.00    | 0.03 |      |      |      | 0.15 |      |      | 0.13 |
| J_beauty    | 0.00 |      |      |      | 0.00    |      | 0.01 |      |      | 0.00    | 0.00 |      | 0.00    | 0.01 |      |      |      | 0.00 |      |      | 0.00 |
| Dominance   | 0.56 |      |      |      | -1.00   |      | 0.84 |      |      | 0.89    |      |      |         | 0.70 |      |      |      | 0.99 |      |      | 0.94 |
| best_df     | 4.13 |      |      |      | 5.00    |      | 3.00 |      |      | 4.00    | 5.00 |      | 5.00    | 3.00 |      |      |      | 5.00 |      |      | 3.00 |
| p_value     | 0.00 |      |      |      | 0.00    |      | 0.00 |      |      | 0.00    | 0.00 |      | 0.00    | 0.00 |      |      |      | 0.00 |      |      | 0.00 |

|                           |       |         |        |         |       |         |       |       |       |
|---------------------------|-------|---------|--------|---------|-------|---------|-------|-------|-------|
| <b>lr_stat</b>            | 37.02 | 42.05   | 38.28  | 49.83   | 41.13 | 28.34   | 32.00 | 36.58 | 27.97 |
| <b>linear_aic</b>         | 20.43 | 33.46   | 11.81  | 14.53   | 14.99 | 20.98   | 26.42 | 27.82 | 13.43 |
| <b>spline_aic</b>         | -0.34 | 9.41    | -12.47 | -19.30  | -8.14 | 10.63   | 8.42  | 9.24  | -0.54 |
| <b>min_age</b>            | 60.80 | 86.92   | 51.40  | 90.50   | 80.72 |         | 27.71 | 45.95 | 42.38 |
| <b>min_value</b>          | 6.70  | 6.89    | 7.09   | 6.45    | 6.75  |         | 6.58  | 6.30  | 6.86  |
| <b>amplitude</b>          | 1.92  | 3.10    | 1.43   | 1.20    | 1.61  | 2.08    | 2.42  | 2.20  | 1.30  |
| <b>delta_endpoints</b>    | 0.47  | 2.29    | 0.90   | -1.06   | 0.76  | -1.83   | 1.19  | 0.96  | 0.51  |
| <b>n_minima</b>           | 3.63  | 5.00    | 3.00   | 3.00    | 4.00  | 4.00    | 3.00  | 4.00  | 3.00  |
| <b>n_maxima</b>           | 3.63  | 4.00    | 2.00   | 3.00    | 5.00  | 5.00    | 3.00  | 4.00  | 3.00  |
| <b>turning_points</b>     | 7.25  | 9.00    | 5.00   | 6.00    | 9.00  | 9.00    | 6.00  | 8.00  | 6.00  |
| <b>r_trough</b>           | 0.64  | 0.93    | 0.46   | 0.98    | 0.85  | 1.00    | 0.14  | 0.39  | 0.34  |
| <b>interior_indicator</b> | True  | 0.00    | 1.00   | 0.00    | 1.00  | 0.00    | 1.00  | 1.00  | 1.00  |
| <b>trough_indicator</b>   | True  | 1.00    | 1.00   | 1.00    | 1.00  | 0.00    | 1.00  | 1.00  | 1.00  |
| <b>U_D_depth</b>          | 0.32  | 0.26    | 0.37   | 0.05    | 0.30  | 0.00    | 0.50  | 0.56  | 0.50  |
| <b>U_I_interiority</b>    | 0.31  | 0.00    | 0.90   | 0.00    | 0.13  | 0.00    | 0.11  | 0.71  | 0.60  |
| <b>U_M_monotonicity</b>   | 0.62  | 0.72    | 0.80   | 0.69    | 0.60  | 0.00    | 0.84  | 0.65  | 0.67  |
| <b>U_C_convexity</b>      | 0.68  | 0.64    | 0.89   | 0.79    | 0.62  | 0.00    | 1.00  | 0.68  | 0.82  |
| <b>U_S_symmetry</b>       | 0.46  | 0.41    | 0.54   | 0.10    | 0.56  | 0.00    | 0.67  | 0.72  | 0.72  |
| <b>J_R_rise</b>           | 0.40  | 0.74    | 0.63   | 0.00    | 0.47  | 0.00    | 0.49  | 0.44  | 0.39  |
| <b>J_M_monotonicity</b>   | 0.53  | 0.51    | 0.51   | 0.54    | 0.58  | 0.46    | 0.61  | 0.51  | 0.57  |
| <b>J_C_rightconvex</b>    | 0.55  | 0.57    | 1.00   | 0.38    | 0.49  | 0.43    | 0.58  | 0.53  | 0.39  |
| <b>P_turning</b>          | 0.02  | 0.00    | 0.06   | 0.03    | 0.00  | 0.00    | 0.03  | 0.01  | 0.03  |
| <b>final_structure</b>    | U     | neither | U      | neither | U     | neither | U     | U     | U     |
| <b>U_supported</b>        | True  | 0.00    | 1.00   | 0.00    | 1.00  | 0.00    | 1.00  | 1.00  | 1.00  |
| <b>J_supported</b>        | False | 0.00    | 0.00   | 0.00    | 0.00  | 0.00    | 0.00  | 0.00  | 0.00  |

Table S6bk. Israel Cantril U-shape ratings, 2006-2024

| KPI                    | Mean    | 2005 | 2006 | 2007 | 2008 | 2009 | 2010 | 2011 | 2012 | 2013    | 2014 | 2015 | 2016 | 2017    | 2018 | 2019 | 2020 | 2021    | 2022 | 2023 | 2024    |
|------------------------|---------|------|------|------|------|------|------|------|------|---------|------|------|------|---------|------|------|------|---------|------|------|---------|
| <b>shape_class</b>     | neither |      |      |      |      |      |      |      |      | neither |      |      |      | neither |      |      |      | neither |      |      | neither |
| <b>U_beauty</b>        | 0.00    |      |      |      |      |      |      |      |      | 0.00    |      |      |      | 0.00    |      |      |      | 0.00    |      |      | 0.00    |
| <b>J_beauty</b>        | 0.00    |      |      |      |      |      |      |      |      | 0.00    |      |      |      | 0.00    |      |      |      | 0.00    |      |      | 0.00    |
| <b>Dominance</b>       |         |      |      |      |      |      |      |      |      |         |      |      |      |         |      |      |      |         |      |      |         |
| <b>best_df</b>         | 5.00    |      |      |      |      |      |      |      |      | 5.00    |      |      |      | 5.00    |      |      |      | 5.00    |      |      | 5.00    |
| <b>p_value</b>         | 0.00    |      |      |      |      |      |      |      |      | 0.00    |      |      |      | 0.00    |      |      |      | 0.00    |      |      | 0.00    |
| <b>lr_stat</b>         | 51.20   |      |      |      |      |      |      |      |      | 49.54   |      |      |      | 47.45   |      |      |      | 35.83   |      |      | 71.97   |
| <b>linear_aic</b>      | 25.78   |      |      |      |      |      |      |      |      | 33.51   |      |      |      | 21.12   |      |      |      | 21.07   |      |      | 27.43   |
| <b>spline_aic</b>      | -7.42   |      |      |      |      |      |      |      |      | 1.97    |      |      |      | -8.33   |      |      |      | 3.24    |      |      | -26.54  |
| <b>min_age</b>         | 89.84   |      |      |      |      |      |      |      |      |         |      |      |      | 91.81   |      |      |      | 87.86   |      |      |         |
| <b>min_value</b>       | 4.98    |      |      |      |      |      |      |      |      |         |      |      |      | 4.99    |      |      |      | 4.97    |      |      |         |
| <b>amplitude</b>       | 3.27    |      |      |      |      |      |      |      |      | 3.78    |      |      |      | 2.04    |      |      |      | 3.14    |      |      | 4.13    |
| <b>delta_endpoints</b> | -2.76   |      |      |      |      |      |      |      |      | -3.78   |      |      |      | -2.03   |      |      |      | -1.11   |      |      | -4.13   |
| <b>n_minima</b>        | 3.75    |      |      |      |      |      |      |      |      | 4.00    |      |      |      | 4.00    |      |      |      | 4.00    |      |      | 3.00    |
| <b>n_maxima</b>        | 3.25    |      |      |      |      |      |      |      |      | 4.00    |      |      |      | 3.00    |      |      |      | 3.00    |      |      | 3.00    |
| <b>turning_points</b>  | 7.00    |      |      |      |      |      |      |      |      | 8.00    |      |      |      | 7.00    |      |      |      | 7.00    |      |      | 6.00    |

|                           |         |  |         |  |         |  |         |  |         |
|---------------------------|---------|--|---------|--|---------|--|---------|--|---------|
| <b>r_trough</b>           | 0.99    |  | 1.00    |  | 1.00    |  | 0.94    |  | 1.00    |
| <b>interior_indicator</b> | False   |  | 0.00    |  | 0.00    |  | 0.00    |  | 0.00    |
| <b>trough_indicator</b>   | False   |  | 0.00    |  | 1.00    |  | 1.00    |  | 0.00    |
| <b>U_D_depth</b>          | 0.16    |  | 0.00    |  | 0.00    |  | 0.65    |  | 0.00    |
| <b>U_I_interiority</b>    | 0.00    |  | 0.00    |  | 0.00    |  | 0.00    |  | 0.00    |
| <b>U_M_monotonicity</b>   | 0.42    |  | 0.00    |  | 0.79    |  | 0.91    |  | 0.00    |
| <b>U_C_convexity</b>      | 0.36    |  | 0.00    |  | 0.76    |  | 0.68    |  | 0.00    |
| <b>U_S_symmetry</b>       | 0.20    |  | 0.00    |  | 0.00    |  | 0.79    |  | 0.00    |
| <b>J_R_rise</b>           | 0.00    |  | 0.00    |  | 0.00    |  | 0.00    |  | 0.00    |
| <b>J_M_monotonicity</b>   | 0.31    |  | 0.33    |  | 0.38    |  | 0.23    |  | 0.30    |
| <b>J_C_rightconvex</b>    | 0.40    |  | 0.45    |  | 0.42    |  | 0.53    |  | 0.20    |
| <b>P_turning</b>          | 0.02    |  | 0.01    |  | 0.01    |  | 0.01    |  | 0.03    |
| <b>final_structure</b>    | neither |  | neither |  | neither |  | neither |  | neither |
| <b>U_supported</b>        | False   |  | 0.00    |  | 0.00    |  | 0.00    |  | 0.00    |
| <b>J_supported</b>        | False   |  | 0.00    |  | 0.00    |  | 0.00    |  | 0.00    |

Table S6bl. Italy Cantril U-shape ratings, 2006-2024

| KPI                       | Mean  | 2005    | 2006 | 2007  | 2008 | 2009  | 2010 | 2011    | 2012  | 2013  | 2014    | 2015 | 2016 | 2017 | 2018 | 2019   | 2020   | 2021 | 2022    | 2023    | 2024    |
|---------------------------|-------|---------|------|-------|------|-------|------|---------|-------|-------|---------|------|------|------|------|--------|--------|------|---------|---------|---------|
| <b>shape_class</b>        | U     | neither |      | U     |      | U     |      | neither | U     | U     | neither |      |      |      |      | U      | U      |      | neither | neither | neither |
| <b>U_beauty</b>           | 0.05  | 0.00    |      | 0.01  |      | 0.09  |      | 0.00    | 0.09  | 0.28  | 0.00    |      |      |      |      | 0.13   | 0.02   |      | 0.00    | 0.00    | 0.00    |
| <b>J_beauty</b>           | 0.00  | 0.00    |      | 0.00  |      | 0.00  |      | 0.00    | 0.00  | 0.00  | 0.00    |      |      |      |      | 0.00   | 0.00   |      | 0.00    | 0.01    | 0.00    |
| <b>Dominance</b>          | 0.48  |         |      | 1.00  |      | 0.93  |      | -1.00   | 1.00  | 1.00  |         |      |      |      |      | 1.00   | 0.91   |      |         | -1.00   |         |
| <b>best_df</b>            | 4.25  | 3.00    |      | 3.00  |      | 5.00  |      | 5.00    | 4.00  | 5.00  | 5.00    |      |      |      |      | 5.00   | 5.00   |      | 5.00    | 3.00    | 3.00    |
| <b>p_value</b>            | 0.05  | 0.00    |      | 0.56  |      | 0.00  |      | 0.00    | 0.00  | 0.00  | 0.00    |      |      |      |      | 0.00   | 0.00   |      | 0.00    | 0.00    | 0.00    |
| <b>lr_stat</b>            | 46.94 | 49.62   |      | 5.79  |      | 42.22 |      | 42.08   | 51.35 | 49.36 | 62.54   |      |      |      |      | 55.84  | 46.68  |      | 52.05   | 58.75   | 47.01   |
| <b>linear_aic</b>         | 25.60 | 24.83   |      | 13.53 |      | 30.99 |      | 28.75   | 29.35 | 24.12 | 34.14   |      |      |      |      | 15.19  | 16.36  |      | 34.97   | 25.57   | 29.39   |
| <b>spline_aic</b>         | -4.84 | -10.79  |      | 21.74 |      | 6.77  |      | 4.68    | -6.00 | -7.24 | -10.40  |      |      |      |      | -22.65 | -12.33 |      | 0.92    | -19.18  | -3.62   |
| <b>min_age</b>            | 74.17 |         |      | 77.53 |      | 71.70 |      | 87.49   | 81.10 | 62.68 |         |      |      |      |      | 64.56  | 63.05  |      |         | 85.23   |         |
| <b>min_value</b>          | 5.66  |         |      | 5.74  |      | 5.75  |      | 4.56    | 5.05  | 5.63  |         |      |      |      |      | 6.35   | 6.54   |      |         | 5.68    |         |
| <b>amplitude</b>          | 2.34  | 2.46    |      | 1.42  |      | 2.58  |      | 2.69    | 2.33  | 1.82  | 3.01    |      |      |      |      | 1.53   | 1.51   |      | 3.00    | 2.31    | 3.45    |
| <b>delta_endpoints</b>    | -0.61 | -2.46   |      | -1.23 |      | 1.24  |      | 0.41    | -0.13 | -0.18 | -2.06   |      |      |      |      | -0.05  | 1.30   |      | -1.67   | 0.86    | -3.30   |
| <b>n_minima</b>           | 2.83  | 3.00    |      | 2.00  |      | 3.00  |      | 3.00    | 2.00  | 3.00  | 3.00    |      |      |      |      | 3.00   | 4.00   |      | 4.00    | 3.00    | 1.00    |
| <b>n_maxima</b>           | 2.92  | 3.00    |      | 2.00  |      | 3.00  |      | 2.00    | 1.00  | 3.00  | 3.00    |      |      |      |      | 4.00   | 5.00   |      | 5.00    | 2.00    | 2.00    |
| <b>turning_points</b>     | 5.75  | 6.00    |      | 4.00  |      | 6.00  |      | 5.00    | 3.00  | 6.00  | 6.00    |      |      |      |      | 7.00   | 9.00   |      | 9.00    | 5.00    | 3.00    |
| <b>r_trough</b>           | 0.84  | 1.00    |      | 0.81  |      | 0.73  |      | 0.94    | 0.85  | 0.61  | 1.00    |      |      |      |      | 0.63   | 0.61   |      | 1.00    | 0.91    | 1.00    |
| <b>interior_indicator</b> | False | 0.00    |      | 1.00  |      | 1.00  |      | 0.00    | 1.00  | 1.00  | 0.00    |      |      |      |      | 1.00   | 1.00   |      | 0.00    | 0.00    | 0.00    |
| <b>trough_indicator</b>   | True  | 0.00    |      | 1.00  |      | 1.00  |      | 1.00    | 1.00  | 1.00  | 0.00    |      |      |      |      | 1.00   | 1.00   |      | 0.00    | 1.00    | 0.00    |
| <b>U_D_depth</b>          | 0.36  | 0.00    |      | 0.13  |      | 0.52  |      | 0.85    | 0.94  | 0.75  | 0.00    |      |      |      |      | 0.42   | 0.11   |      | 0.00    | 0.63    | 0.00    |
| <b>U_I_interiority</b>    | 0.24  | 0.00    |      | 0.23  |      | 0.43  |      | 0.00    | 0.11  | 0.73  | 0.00    |      |      |      |      | 0.66   | 0.71   |      | 0.00    | 0.00    | 0.00    |
| <b>U_M_monotonicity</b>   | 0.52  | 0.00    |      | 0.77  |      | 0.72  |      | 0.86    | 0.92  | 0.75  | 0.00    |      |      |      |      | 0.68   | 0.72   |      | 0.00    | 0.76    | 0.00    |
| <b>U_C_convexity</b>      | 0.50  | 0.00    |      | 0.84  |      | 0.71  |      | 0.67    | 0.90  | 0.67  | 0.00    |      |      |      |      | 0.73   | 0.68   |      | 0.00    | 0.78    | 0.00    |
| <b>U_S_symmetry</b>       | 0.47  | 0.00    |      | 0.24  |      | 0.68  |      | 0.92    | 0.97  | 0.94  | 0.00    |      |      |      |      | 0.96   | 0.20   |      | 0.00    | 0.77    | 0.00    |
| <b>J_R_rise</b>           | 0.16  | 0.00    |      | 0.00  |      | 0.48  |      | 0.15    | 0.00  | 0.00  | 0.00    |      |      |      |      | 0.00   | 0.86   |      | 0.00    | 0.37    | 0.00    |
| <b>J_M_monotonicity</b>   | 0.37  | 0.34    |      | 0.27  |      | 0.41  |      | 0.31    | 0.27  | 0.32  | 0.38    |      |      |      |      | 0.47   | 0.46   |      | 0.50    | 0.47    | 0.25    |

|                        |       |         |      |      |         |      |      |         |  |      |      |         |         |         |
|------------------------|-------|---------|------|------|---------|------|------|---------|--|------|------|---------|---------|---------|
| <b>J_C_rightconvex</b> | 0.53  | 0.42    | 0.51 | 0.59 | 0.51    | 0.90 | 0.48 | 0.56    |  | 0.51 | 0.52 | 0.43    | 0.59    | 0.33    |
| <b>P_turning</b>       | 0.07  | 0.03    | 0.12 | 0.03 | 0.06    | 0.25 | 0.03 | 0.03    |  | 0.01 | 0.00 | 0.00    | 0.06    | 0.25    |
| <b>final_structure</b> | U     | neither | U    | U    | neither | U    | U    | neither |  | U    | U    | neither | neither | neither |
| <b>U_supported</b>     | False | 0.00    | 1.00 | 1.00 | 0.00    | 1.00 | 1.00 | 0.00    |  | 1.00 | 1.00 | 0.00    | 0.00    | 0.00    |
| <b>J_supported</b>     | False | 0.00    | 0.00 | 0.00 | 0.00    | 0.00 | 0.00 | 0.00    |  | 0.00 | 0.00 | 0.00    | 0.00    | 0.00    |

Table S6bm. Ivory Coast Cantril U-shape ratings, 2006-2024

| KPI                       | Mean    | 2005 | 2006 | 2007 | 2008 | 2009 | 2010 | 2011 | 2012 | 2013 | 2014 | 2015    | 2016 | 2017 | 2018 | 2019 | 2020 | 2021 | 2022 | 2023 | 2024 |  |
|---------------------------|---------|------|------|------|------|------|------|------|------|------|------|---------|------|------|------|------|------|------|------|------|------|--|
| <b>shape_class</b>        | neither |      |      |      |      |      |      |      |      |      |      | neither |      |      |      |      |      |      |      |      |      |  |
| <b>U_beauty</b>           | 0.00    |      |      |      |      |      |      |      |      |      |      | 0.00    |      |      |      |      |      |      |      |      |      |  |
| <b>J_beauty</b>           | 0.00    |      |      |      |      |      |      |      |      |      |      | 0.00    |      |      |      |      |      |      |      |      |      |  |
| <b>Dominance</b>          | -1.00   |      |      |      |      |      |      |      |      |      |      | -1.00   |      |      |      |      |      |      |      |      |      |  |
| <b>best_df</b>            | 5.00    |      |      |      |      |      |      |      |      |      |      | 5.00    |      |      |      |      |      |      |      |      |      |  |
| <b>p_value</b>            | 0.00    |      |      |      |      |      |      |      |      |      |      | 0.00    |      |      |      |      |      |      |      |      |      |  |
| <b>lr_stat</b>            | 36.33   |      |      |      |      |      |      |      |      |      |      | 36.33   |      |      |      |      |      |      |      |      |      |  |
| <b>linear_aic</b>         | 42.90   |      |      |      |      |      |      |      |      |      |      | 42.90   |      |      |      |      |      |      |      |      |      |  |
| <b>spline_aic</b>         | 24.57   |      |      |      |      |      |      |      |      |      |      | 24.57   |      |      |      |      |      |      |      |      |      |  |
| <b>min_age</b>            | 87.86   |      |      |      |      |      |      |      |      |      |      | 87.86   |      |      |      |      |      |      |      |      |      |  |
| <b>min_value</b>          | 1.06    |      |      |      |      |      |      |      |      |      |      | 1.06    |      |      |      |      |      |      |      |      |      |  |
| <b>amplitude</b>          | 3.92    |      |      |      |      |      |      |      |      |      |      | 3.92    |      |      |      |      |      |      |      |      |      |  |
| <b>delta_endpoints</b>    | 0.23    |      |      |      |      |      |      |      |      |      |      | 0.23    |      |      |      |      |      |      |      |      |      |  |
| <b>n_minima</b>           | 4.00    |      |      |      |      |      |      |      |      |      |      | 4.00    |      |      |      |      |      |      |      |      |      |  |
| <b>n_maxima</b>           | 4.00    |      |      |      |      |      |      |      |      |      |      | 4.00    |      |      |      |      |      |      |      |      |      |  |
| <b>turning_points</b>     | 8.00    |      |      |      |      |      |      |      |      |      |      | 8.00    |      |      |      |      |      |      |      |      |      |  |
| <b>r_trough</b>           | 0.94    |      |      |      |      |      |      |      |      |      |      | 0.94    |      |      |      |      |      |      |      |      |      |  |
| <b>interior_indicator</b> | False   |      |      |      |      |      |      |      |      |      |      | 0.00    |      |      |      |      |      |      |      |      |      |  |
| <b>trough_indicator</b>   | True    |      |      |      |      |      |      |      |      |      |      | 1.00    |      |      |      |      |      |      |      |      |      |  |
| <b>U_D_depth</b>          | 0.94    |      |      |      |      |      |      |      |      |      |      | 0.94    |      |      |      |      |      |      |      |      |      |  |
| <b>U_I_interiority</b>    | 0.00    |      |      |      |      |      |      |      |      |      |      | 0.00    |      |      |      |      |      |      |      |      |      |  |
| <b>U_M_monotonicity</b>   | 0.79    |      |      |      |      |      |      |      |      |      |      | 0.79    |      |      |      |      |      |      |      |      |      |  |
| <b>U_C_convexity</b>      | 0.68    |      |      |      |      |      |      |      |      |      |      | 0.68    |      |      |      |      |      |      |      |      |      |  |
| <b>U_S_symmetry</b>       | 0.97    |      |      |      |      |      |      |      |      |      |      | 0.97    |      |      |      |      |      |      |      |      |      |  |
| <b>J_R_rise</b>           | 0.06    |      |      |      |      |      |      |      |      |      |      | 0.06    |      |      |      |      |      |      |      |      |      |  |
| <b>J_M_monotonicity</b>   | 0.41    |      |      |      |      |      |      |      |      |      |      | 0.41    |      |      |      |      |      |      |      |      |      |  |
| <b>J_C_rightconvex</b>    | 0.54    |      |      |      |      |      |      |      |      |      |      | 0.54    |      |      |      |      |      |      |      |      |      |  |
| <b>P_turning</b>          | 0.01    |      |      |      |      |      |      |      |      |      |      | 0.01    |      |      |      |      |      |      |      |      |      |  |
| <b>final_structure</b>    | neither |      |      |      |      |      |      |      |      |      |      | neither |      |      |      |      |      |      |      |      |      |  |
| <b>U_supported</b>        | False   |      |      |      |      |      |      |      |      |      |      | 0.00    |      |      |      |      |      |      |      |      |      |  |
| <b>J_supported</b>        | False   |      |      |      |      |      |      |      |      |      |      | 0.00    |      |      |      |      |      |      |      |      |      |  |

Table S6bn. Jamaica Cantril U-shape ratings, 2006-2024

| KPI                | Mean    | 2005 | 2006    | 2007 | 2008 | 2009 | 2010 | 2011 | 2012 | 2013    | 2014  | 2015 | 2016 | 2017 | 2018 | 2019 | 2020    | 2021  | 2022    | 2023 | 2024 |
|--------------------|---------|------|---------|------|------|------|------|------|------|---------|-------|------|------|------|------|------|---------|-------|---------|------|------|
| shape_class        | neither |      | neither |      |      |      |      |      |      | neither | U     |      |      |      |      |      | U       |       | neither |      |      |
| U_beauty           | 0.03    |      | 0.00    |      |      |      |      |      |      | 0.00    | 0.11  |      |      |      |      |      | 0.00    | 0.04  | 0.00    |      |      |
| J_beauty           | 0.00    |      | 0.00    |      |      |      |      |      |      | 0.01    | 0.00  |      |      |      |      |      | 0.01    | 0.00  |         |      |      |
| Dominance          | -0.26   |      | -1.00   |      |      |      |      |      |      | -1.00   | 0.99  |      |      |      |      |      | -1.00   | 0.73  |         |      |      |
| best_df            | 4.33    |      | 5.00    |      |      |      |      |      |      | 3.00    | 5.00  |      |      |      |      |      | 5.00    | 5.00  |         |      |      |
| p_value            | 0.00    |      | 0.00    |      |      |      |      |      |      | 0.00    | 0.00  |      |      |      |      |      | 0.00    | 0.00  |         |      |      |
| lr_stat            | 39.90   |      | 50.07   |      |      |      |      |      |      | 35.65   | 28.62 |      |      |      |      |      | 28.81   | 32.26 | 63.99   |      |      |
| linear_aic         | 48.37   |      | 39.65   |      |      |      |      |      |      | 55.15   | 60.41 |      |      |      |      |      | 42.69   | 35.68 | 56.65   |      |      |
| spline_aic         | 25.14   |      | 7.58    |      |      |      |      |      |      | 33.50   | 49.79 |      |      |      |      |      | 31.88   | 17.42 | 10.66   |      |      |
| min_age            | 56.70   |      | 21.32   |      |      |      |      |      |      | 85.23   | 54.22 |      |      |      |      |      | 88.24   | 34.48 |         |      |      |
| min_value          | 4.72    |      | 5.88    |      |      |      |      |      |      | 4.13    | 3.65  |      |      |      |      |      | 4.25    | 5.68  |         |      |      |
| amplitude          | 4.96    |      | 4.45    |      |      |      |      |      |      | 5.89    | 6.32  |      |      |      |      |      | 3.07    | 3.30  | 6.69    |      |      |
| delta_endpoints    | 1.28    |      | 1.81    |      |      |      |      |      |      | 3.81    | 3.95  |      |      |      |      |      | 0.87    | 2.28  | -5.01   |      |      |
| n_minima           | 3.33    |      | 3.00    |      |      |      |      |      |      | 3.00    | 5.00  |      |      |      |      |      | 4.00    | 3.00  | 2.00    |      |      |
| n_maxima           | 2.83    |      | 3.00    |      |      |      |      |      |      | 2.00    | 4.00  |      |      |      |      |      | 3.00    | 3.00  | 2.00    |      |      |
| turning_points     | 6.17    |      | 6.00    |      |      |      |      |      |      | 5.00    | 9.00  |      |      |      |      |      | 7.00    | 6.00  | 4.00    |      |      |
| r_trough           | 0.61    |      | 0.06    |      |      |      |      |      |      | 0.91    | 0.50  |      |      |      |      |      | 0.95    | 0.23  | 1.00    |      |      |
| interior_indicator | False   |      | 0.00    |      |      |      |      |      |      | 0.00    | 1.00  |      |      |      |      |      | 0.00    | 1.00  | 0.00    |      |      |
| trough_indicator   | True    |      | 1.00    |      |      |      |      |      |      | 1.00    | 1.00  |      |      |      |      |      | 1.00    | 1.00  | 0.00    |      |      |
| U_D_depth          | 0.30    |      | 0.07    |      |      |      |      |      |      | 0.35    | 0.38  |      |      |      |      |      | 0.72    | 0.31  | 0.00    |      |      |
| U_I_interiority    | 0.22    |      | 0.00    |      |      |      |      |      |      | 0.00    | 0.99  |      |      |      |      |      | 0.00    | 0.33  | 0.00    |      |      |
| U_M_monotonicity   | 0.60    |      | 0.78    |      |      |      |      |      |      | 0.74    | 0.62  |      |      |      |      |      | 0.75    | 0.74  | 0.00    |      |      |
| U_C_convexity      | 0.64    |      | 0.73    |      |      |      |      |      |      | 0.76    | 0.67  |      |      |      |      |      | 0.67    | 1.00  | 0.00    |      |      |
| U_S_symmetry       | 0.44    |      | 0.26    |      |      |      |      |      |      | 0.52    | 0.55  |      |      |      |      |      | 0.84    | 0.47  | 0.00    |      |      |
| J_R_rise           | 0.44    |      | 0.41    |      |      |      |      |      |      | 0.65    | 0.62  |      |      |      |      |      | 0.28    | 0.69  | 0.00    |      |      |
| J_M_monotonicity   | 0.49    |      | 0.57    |      |      |      |      |      |      | 0.50    | 0.50  |      |      |      |      |      | 0.47    | 0.54  | 0.37    |      |      |
| J_C_rightconvex    | 0.54    |      | 0.51    |      |      |      |      |      |      | 0.58    | 0.58  |      |      |      |      |      | 0.50    | 0.54  | 0.52    |      |      |
| P_turning          | 0.04    |      | 0.03    |      |      |      |      |      |      | 0.06    | 0.00  |      |      |      |      |      | 0.01    | 0.03  | 0.12    |      |      |
| final_structure    | neither |      | neither |      |      |      |      |      |      | neither | U     |      |      |      |      |      | neither | U     | neither |      |      |
| U_supported        | False   |      | 0.00    |      |      |      |      |      |      | 0.00    | 1.00  |      |      |      |      |      | 0.00    | 1.00  | 0.00    |      |      |
| J_supported        | False   |      | 0.00    |      |      |      |      |      |      | 0.00    | 0.00  |      |      |      |      |      | 0.00    | 0.00  | 0.00    |      |      |

Table S6bo. Japan Cantril U-shape ratings, 2006-2024

| KPI         | Mean | 2005 | 2006 | 2007 | 2008 | 2009 | 2010    | 2011 | 2012 | 2013    | 2014 | 2015    | 2016 | 2017    | 2018    | 2019 | 2020    | 2021 | 2022 | 2023    | 2024 |
|-------------|------|------|------|------|------|------|---------|------|------|---------|------|---------|------|---------|---------|------|---------|------|------|---------|------|
| shape_class | U    | U    |      |      | U    | U    | neither | U    | U    | neither | U    | neither | U    | neither | neither | U    | neither | U    | U    | neither | U    |
| U_beauty    | 0.04 | 0.04 |      |      | 0.03 | 0.00 | 0.00    | 0.12 | 0.17 | 0.00    | 0.01 | 0.00    | 0.00 | 0.00    | 0.00    | 0.12 | 0.00    | 0.10 | 0.09 | 0.00    | 0.08 |
| J_beauty    | 0.00 | 0.00 |      |      | 0.00 | 0.00 | 0.00    | 0.00 | 0.00 | 0.00    | 0.00 | 0.00    | 0.00 | 0.00    | 0.00    | 0.00 | 0.00    | 0.00 | 0.00 | 0.00    | 0.01 |
| Dominance   | 0.54 | 0.88 |      |      | 0.86 | 1.00 | -1.00   | 1.00 | 0.98 |         | 1.00 |         | 1.00 |         |         | 0.98 | -1.00   | 0.97 | 0.98 | -1.00   | 0.86 |
| best_df     | 4.11 | 5.00 |      |      | 5.00 | 4.00 | 5.00    | 5.00 | 5.00 | 3.00    | 3.00 | 3.00    | 3.00 | 5.00    | 3.00    | 5.00 | 4.00    | 3.00 | 5.00 | 5.00    | 3.00 |
| p_value     | 0.01 | 0.00 |      |      | 0.00 | 0.00 | 0.00    | 0.01 | 0.00 | 0.00    | 0.00 | 0.00    | 0.00 | 0.00    | 0.00    | 0.00 | 0.00    | 0.11 | 0.00 | 0.00    | 0.00 |

|                           |       |        |       |       |         |       |        |         |        |         |       |         |         |       |         |       |       |         |        |
|---------------------------|-------|--------|-------|-------|---------|-------|--------|---------|--------|---------|-------|---------|---------|-------|---------|-------|-------|---------|--------|
| <b>lr_stat</b>            | 41.60 | 71.77  | 73.33 | 29.07 | 65.30   | 20.90 | 42.59  | 46.06   | 52.29  | 21.21   | 32.45 | 29.32   | 39.44   | 28.03 | 55.65   | 11.72 | 40.61 | 44.44   | 44.63  |
| <b>linear_aic</b>         | 21.74 | 24.64  | 47.43 | 21.19 | 50.03   | 7.88  | 9.82   | 33.63   | 13.44  | 23.60   | 11.59 | 11.93   | 26.30   | 12.52 | 27.18   | 12.07 | 24.10 | 18.68   | 15.38  |
| <b>spline_aic</b>         | -3.63 | -29.12 | -7.90 | 8.12  | 2.73    | 4.98  | -14.77 | 1.56    | -24.85 | 16.39   | -6.86 | 0.60    | 0.86    | 2.49  | -12.47  | 14.36 | 1.49  | -7.76   | -15.24 |
| <b>min_age</b>            | 66.96 | 79.59  | 71.89 | 24.89 | 85.61   | 62.68 | 76.77  | 78.84   | 84.29  | 86.55   | 36.92 | 86.74   | 30.91   | 31.47 | 88.05   | 79.22 |       |         |        |
| <b>min_value</b>          | 5.51  | 6.05   | 5.37  | 5.28  | 5.26    | 5.97  | 5.56   | 5.19    | 5.58   | 5.12    | 5.66  | 5.06    | 5.76    | 5.74  | 5.12    | 5.98  |       |         |        |
| <b>amplitude</b>          | 2.09  | 1.95   | 4.62  | 1.70  | 4.74    | 1.21  | 1.11   | 3.88    | 1.61   | 2.09    | 1.19  | 1.88    | 2.47    | 1.20  | 2.27    | 0.87  | 1.89  | 1.47    | 1.39   |
| <b>delta_endpoints</b>    | -0.09 | 1.00   | 3.69  | -0.98 | 3.19    | -0.67 | 0.09   | -3.72   | -1.31  | -2.09   | -0.02 | -1.35   | -1.42   | 0.36  | 0.18    | 0.11  | 0.62  | 0.19    | 0.43   |
| <b>n_minima</b>           | 3.33  | 4.00   | 4.00  | 3.00  | 4.00    | 3.00  | 2.00   | 3.00    | 2.00   | 3.00    | 3.00  | 3.00    | 4.00    | 4.00  | 3.00    | 4.00  | 4.00  | 4.00    | 3.00   |
| <b>n_maxima</b>           | 3.00  | 3.00   | 4.00  | 3.00  | 3.00    | 4.00  | 2.00   | 3.00    | 3.00   | 2.00    | 2.00  | 4.00    | 2.00    | 3.00  | 3.00    | 3.00  | 4.00  | 4.00    | 2.00   |
| <b>turning_points</b>     | 6.33  | 7.00   | 8.00  | 6.00  | 7.00    | 8.00  | 5.00   | 5.00    | 6.00   | 4.00    | 5.00  | 7.00    | 5.00    | 7.00  | 7.00    | 6.00  | 8.00  | 8.00    | 5.00   |
| <b>r_trough</b>           | 0.72  | 0.83   | 0.73  | 0.11  | 0.91    | 0.61  | 0.80   | 1.00    | 0.82   | 1.00    | 0.90  | 1.00    | 0.93    | 0.27  | 0.93    | 0.19  | 0.19  | 0.95    | 0.83   |
| <b>interior_indicator</b> | True  | 1.00   | 1.00  | 1.00  | 0.00    | 1.00  | 1.00   | 0.00    | 1.00   | 0.00    | 1.00  | 0.00    | 0.00    | 1.00  | 0.00    | 1.00  | 1.00  | 0.00    | 1.00   |
| <b>trough_indicator</b>   | True  | 1.00   | 1.00  | 1.00  | 1.00    | 1.00  | 1.00   | 0.00    | 1.00   | 0.00    | 1.00  | 0.00    | 1.00    | 1.00  | 1.00    | 1.00  | 1.00  | 1.00    | 1.00   |
| <b>U_D_depth</b>          | 0.51  | 0.49   | 0.20  | 0.42  | 0.33    | 0.45  | 0.92   | 0.00    | 0.18   | 0.00    | 0.98  | 0.00    | 0.42    | 0.70  | 0.92    | 0.87  | 0.67  | 0.87    | 0.69   |
| <b>U_I_interiority</b>    | 0.16  | 0.16   | 0.42  | 0.01  | 0.00    | 0.73  | 0.26   | 0.00    | 0.19   | 0.00    | 0.01  | 0.00    | 0.00    | 0.41  | 0.00    | 0.21  | 0.23  | 0.00    | 0.18   |
| <b>U_M_monotonicity</b>   | 0.62  | 0.76   | 0.73  | 0.80  | 0.77    | 0.66  | 0.83   | 0.00    | 0.67   | 0.00    | 0.83  | 0.00    | 0.72    | 0.67  | 0.76    | 0.71  | 0.76  | 0.72    | 0.81   |
| <b>U_C_convexity</b>      | 0.66  | 0.82   | 0.70  | 0.77  | 0.62    | 0.73  | 1.00   | 0.00    | 0.85   | 0.00    | 0.76  | 0.00    | 0.80    | 0.70  | 0.72    | 0.81  | 0.97  | 0.66    | 0.95   |
| <b>U_S_symmetry</b>       | 0.60  | 0.66   | 0.33  | 0.60  | 0.49    | 0.62  | 0.96   | 0.00    | 0.31   | 0.00    | 0.99  | 0.00    | 0.60    | 0.82  | 0.96    | 0.93  | 0.80  | 0.93    | 0.82   |
| <b>J_R_rise</b>           | 0.19  | 0.51   | 0.80  | 0.00  | 0.67    | 0.00  | 0.08   | 0.00    | 0.00   | 0.00    | 0.00  | 0.00    | 0.00    | 0.30  | 0.08    | 0.13  | 0.33  | 0.13    | 0.31   |
| <b>J_M_monotonicity</b>   | 0.48  | 0.52   | 0.50  | 0.58  | 0.46    | 0.47  | 0.46   | 0.31    | 0.46   | 0.49    | 0.39  | 0.60    | 0.53    | 0.50  | 0.47    | 0.49  | 0.49  | 0.51    | 0.46   |
| <b>J_C_rightconvex</b>    | 0.58  | 0.69   | 0.64  | 0.54  | 0.64    | 0.48  | 0.74   | 0.42    | 0.57   | 0.00    | 0.62  | 0.35    | 0.55    | 0.77  | 0.49    | 0.82  | 0.60  | 0.54    | 1.00   |
| <b>P_turning</b>          | 0.03  | 0.01   | 0.01  | 0.03  | 0.01    | 0.01  | 0.06   | 0.06    | 0.03   | 0.12    | 0.06  | 0.01    | 0.06    | 0.01  | 0.01    | 0.03  | 0.01  | 0.01    | 0.06   |
| <b>final_structure</b>    | U     | U      | U     | U     | neither | U     | U      | neither | U      | neither | U     | neither | neither | U     | neither | U     | U     | neither | U      |
| <b>U_supported</b>        | True  | 1.00   | 1.00  | 1.00  | 0.00    | 1.00  | 1.00   | 0.00    | 1.00   | 0.00    | 1.00  | 0.00    | 0.00    | 1.00  | 0.00    | 1.00  | 1.00  | 0.00    | 1.00   |
| <b>J_supported</b>        | False | 0.00   | 0.00  | 0.00  | 0.00    | 0.00  | 0.00   | 0.00    | 0.00   | 0.00    | 0.00  | 0.00    | 0.00    | 0.00  | 0.00    | 0.00  | 0.00  | 0.00    | 0.00   |

Table S6bp. Jordan Cantril U-shape ratings, 2006-2024

| KPI                    | Mean  | 2005 | 2006 | 2007 | 2008 | 2009 | 2010 | 2011   | 2012 | 2013 | 2014    | 2015 | 2016 | 2017    | 2018 | 2019 | 2020 | 2021 | 2022 | 2023 | 2024  |
|------------------------|-------|------|------|------|------|------|------|--------|------|------|---------|------|------|---------|------|------|------|------|------|------|-------|
| <b>shape_class</b>     | U     |      |      |      |      |      |      | U      |      |      | neither |      |      | neither |      |      |      |      |      |      | U     |
| <b>U_beauty</b>        | 0.04  |      |      |      |      |      |      | 0.03   |      |      | 0.00    |      |      | 0.00    |      |      |      |      |      |      | 0.13  |
| <b>J_beauty</b>        | 0.01  |      |      |      |      |      |      | 0.01   |      |      | 0.00    |      |      | 0.00    |      |      |      |      |      |      | 0.01  |
| <b>Dominance</b>       | 0.73  |      |      |      |      |      |      | 0.65   |      |      |         |      |      |         |      |      |      |      |      |      | 0.81  |
| <b>best_df</b>         | 4.50  |      |      |      |      |      |      | 5.00   |      |      | 3.00    |      |      | 5.00    |      |      |      |      |      |      | 5.00  |
| <b>p_value</b>         | 0.00  |      |      |      |      |      |      | 0.00   |      |      | 0.00    |      |      | 0.00    |      |      |      |      |      |      | 0.00  |
| <b>lr_stat</b>         | 53.23 |      |      |      |      |      |      | 88.64  |      |      | 25.25   |      |      | 31.69   |      |      |      |      |      |      | 67.36 |
| <b>linear_aic</b>      | 46.64 |      |      |      |      |      |      | 45.68  |      |      | 28.37   |      |      | 53.73   |      |      |      |      |      |      | 58.78 |
| <b>spline_aic</b>      | 10.41 |      |      |      |      |      |      | -24.96 |      |      | 17.12   |      |      | 40.04   |      |      |      |      |      |      | 9.42  |
| <b>min_age</b>         | 74.46 |      |      |      |      |      |      | 78.47  |      |      | 89.56   |      |      |         |      |      |      |      |      |      | 55.35 |
| <b>min_value</b>       | 4.05  |      |      |      |      |      |      | 4.67   |      |      | 3.82    |      |      |         |      |      |      |      |      |      | 3.66  |
| <b>amplitude</b>       | 4.71  |      |      |      |      |      |      | 4.12   |      |      | 2.55    |      |      | 5.81    |      |      |      |      |      |      | 6.33  |
| <b>delta_endpoints</b> | -0.42 |      |      |      |      |      |      | 1.91   |      |      | -2.36   |      |      | -5.81   |      |      |      |      |      |      | 4.58  |
| <b>n_minima</b>        | 2.75  |      |      |      |      |      |      | 2.00   |      |      | 3.00    |      |      | 3.00    |      |      |      |      |      |      | 3.00  |
| <b>n_maxima</b>        | 2.25  |      |      |      |      |      |      | 2.00   |      |      | 2.00    |      |      | 3.00    |      |      |      |      |      |      | 2.00  |
| <b>turning_points</b>  | 5.00  |      |      |      |      |      |      | 4.00   |      |      | 5.00    |      |      | 6.00    |      |      |      |      |      |      | 5.00  |

|                           |       |      |         |         |      |
|---------------------------|-------|------|---------|---------|------|
| <b>r_trough</b>           | 0.82  | 0.82 | 0.97    | 1.00    | 0.51 |
| <b>interior_indicator</b> | True  | 1.00 | 0.00    | 0.00    | 1.00 |
| <b>trough_indicator</b>   | True  | 1.00 | 1.00    | 0.00    | 1.00 |
| <b>U_D_depth</b>          | 0.17  | 0.35 | 0.07    | 0.00    | 0.28 |
| <b>U_I_interiority</b>    | 0.29  | 0.20 | 0.00    | 0.00    | 0.97 |
| <b>U_M_monotonicity</b>   | 0.61  | 0.83 | 0.75    | 0.00    | 0.84 |
| <b>U_C_convexity</b>      | 0.62  | 0.68 | 0.92    | 0.03    | 0.86 |
| <b>U_S_symmetry</b>       | 0.29  | 0.60 | 0.14    | 0.00    | 0.43 |
| <b>J_R_rise</b>           | 0.30  | 0.46 | 0.00    | 0.00    | 0.72 |
| <b>J_M_monotonicity</b>   | 0.40  | 0.29 | 0.46    | 0.34    | 0.51 |
| <b>J_C_rightconvex</b>    | 0.50  | 0.54 | 0.49    | 0.42    | 0.55 |
| <b>P_turning</b>          | 0.07  | 0.12 | 0.06    | 0.03    | 0.06 |
| <b>final_structure</b>    | U     | U    | neither | neither | U    |
| <b>U_supported</b>        | True  | 1.00 | 0.00    | 0.00    | 1.00 |
| <b>J_supported</b>        | False | 0.00 | 0.00    | 0.00    | 0.00 |

Table S6bq. Kazakhstan Cantril U-shape ratings, 2006-2024

| KPI                       | Mean    | 2005 | 2006 | 2007  | 2008 | 2009 | 2010 | 2011 | 2012    | 2013    | 2014 | 2015    | 2016  | 2017 | 2018  | 2019 | 2020 | 2021 | 2022 | 2023 | 2024    |
|---------------------------|---------|------|------|-------|------|------|------|------|---------|---------|------|---------|-------|------|-------|------|------|------|------|------|---------|
| <b>shape_class</b>        | neither |      |      | U     |      |      |      |      | neither | neither |      | neither | U     |      | U     |      |      |      |      |      | neither |
| <b>U_beauty</b>           | 0.03    |      |      | 0.04  |      |      |      |      | 0.00    | 0.00    |      | 0.00    | 0.09  |      | 0.06  |      |      |      |      |      | 0.00    |
| <b>J_beauty</b>           | 0.00    |      |      | 0.00  |      |      |      |      | 0.01    | 0.00    |      | 0.00    | 0.00  |      | 0.00  |      |      |      |      |      | 0.00    |
| <b>Dominance</b>          | 0.18    |      |      | 1.00  |      |      |      |      | -1.00   |         |      |         | 1.00  |      | 0.93  |      |      |      |      |      | -1.00   |
| <b>best_df</b>            | 4.86    |      |      | 5.00  |      |      |      |      | 5.00    | 5.00    |      | 5.00    | 5.00  |      | 4.00  |      |      |      |      |      | 5.00    |
| <b>p_value</b>            | 0.02    |      |      | 0.14  |      |      |      |      | 0.00    | 0.00    |      | 0.00    | 0.00  |      | 0.00  |      |      |      |      |      | 0.00    |
| <b>lr_stat</b>            | 43.86   |      |      | 13.54 |      |      |      |      | 49.45   | 43.25   |      | 49.90   | 64.36 |      | 36.41 |      |      |      |      |      | 50.13   |
| <b>linear_aic</b>         | 33.35   |      |      | 6.11  |      |      |      |      | 54.25   | 29.92   |      | 41.11   | 42.58 |      | 18.56 |      |      |      |      |      | 40.92   |
| <b>spline_aic</b>         | 7.20    |      |      | 10.57 |      |      |      |      | 22.80   | 4.67    |      | 9.21    | -3.78 |      | -1.85 |      |      |      |      |      | 8.79    |
| <b>min_age</b>            | 72.30   |      |      | 81.29 |      |      |      |      | 86.55   |         |      |         | 66.25 |      | 39.74 |      |      |      |      |      | 87.68   |
| <b>min_value</b>          | 4.80    |      |      | 5.21  |      |      |      |      | 4.41    |         |      |         | 4.83  |      | 5.68  |      |      |      |      |      | 3.87    |
| <b>amplitude</b>          | 3.24    |      |      | 1.02  |      |      |      |      | 5.58    | 2.70    |      | 3.88    | 3.86  |      | 1.52  |      |      |      |      |      | 4.14    |
| <b>delta_endpoints</b>    | 0.08    |      |      | 0.01  |      |      |      |      | 4.14    | -2.05   |      | -3.67   | -0.21 |      | 0.77  |      |      |      |      |      | 1.55    |
| <b>n_minima</b>           | 3.29    |      |      | 3.00  |      |      |      |      | 2.00    | 4.00    |      | 3.00    | 3.00  |      | 4.00  |      |      |      |      |      | 4.00    |
| <b>n_maxima</b>           | 3.29    |      |      | 4.00  |      |      |      |      | 2.00    | 4.00    |      | 3.00    | 3.00  |      | 3.00  |      |      |      |      |      | 4.00    |
| <b>turning_points</b>     | 6.57    |      |      | 7.00  |      |      |      |      | 4.00    | 8.00    |      | 6.00    | 6.00  |      | 7.00  |      |      |      |      |      | 8.00    |
| <b>r_trough</b>           | 0.81    |      |      | 0.86  |      |      |      |      | 0.93    | 1.00    |      | 1.00    | 0.66  |      | 0.30  |      |      |      |      |      | 0.94    |
| <b>interior_indicator</b> | False   |      |      | 1.00  |      |      |      |      | 0.00    | 0.00    |      | 0.00    | 1.00  |      | 1.00  |      |      |      |      |      | 0.00    |
| <b>trough_indicator</b>   | True    |      |      | 1.00  |      |      |      |      | 1.00    | 0.00    |      | 0.00    | 1.00  |      | 1.00  |      |      |      |      |      | 1.00    |
| <b>U_D_depth</b>          | 0.33    |      |      | 0.78  |      |      |      |      | 0.26    | 0.00    |      | 0.00    | 0.31  |      | 0.37  |      |      |      |      |      | 0.63    |
| <b>U_I_interiority</b>    | 0.17    |      |      | 0.11  |      |      |      |      | 0.00    | 0.00    |      | 0.00    | 0.61  |      | 0.51  |      |      |      |      |      | 0.00    |
| <b>U_M_monotonicity</b>   | 0.53    |      |      | 0.73  |      |      |      |      | 0.89    | 0.00    |      | 0.00    | 0.70  |      | 0.64  |      |      |      |      |      | 0.75    |
| <b>U_C_convexity</b>      | 0.48    |      |      | 0.62  |      |      |      |      | 0.64    | 0.00    |      | 0.00    | 0.70  |      | 0.72  |      |      |      |      |      | 0.65    |
| <b>U_S_symmetry</b>       | 0.53    |      |      | 0.99  |      |      |      |      | 0.41    | 0.00    |      | 0.00    | 0.92  |      | 0.59  |      |      |      |      |      | 0.77    |
| <b>J_R_rise</b>           | 0.23    |      |      | 0.01  |      |      |      |      | 0.74    | 0.00    |      | 0.00    | 0.00  |      | 0.50  |      |      |      |      |      | 0.37    |
| <b>J_M_monotonicity</b>   | 0.43    |      |      | 0.40  |      |      |      |      | 0.27    | 0.46    |      | 0.38    | 0.48  |      | 0.55  |      |      |      |      |      | 0.47    |

|                        |         |      |         |         |         |      |      |         |
|------------------------|---------|------|---------|---------|---------|------|------|---------|
| <b>J_C_rightconvex</b> | 0.46    | 0.49 | 0.55    | 0.41    | 0.23    | 0.52 | 0.45 | 0.56    |
| <b>P_turning</b>       | 0.03    | 0.01 | 0.12    | 0.01    | 0.03    | 0.03 | 0.01 | 0.01    |
| <b>final_structure</b> | neither | U    | neither | neither | neither | U    | U    | neither |
| <b>U_supported</b>     | False   | 1.00 | 0.00    | 0.00    | 0.00    | 1.00 | 1.00 | 0.00    |
| <b>J_supported</b>     | False   | 0.00 | 0.00    | 0.00    | 0.00    | 0.00 | 0.00 | 0.00    |

Table S6br. Kenya Cantril U-shape ratings, 2006-2024

| KPI                       | Mean  | 2005 | 2006 | 2007 | 2008 | 2009 | 2010 | 2011  | 2012 | 2013 | 2014 | 2015 | 2016 | 2017 | 2018 | 2019 | 2020 | 2021 | 2022 | 2023 | 2024 |
|---------------------------|-------|------|------|------|------|------|------|-------|------|------|------|------|------|------|------|------|------|------|------|------|------|
| <b>shape_class</b>        | U     |      |      |      |      |      |      | U     |      |      |      |      |      |      |      |      |      |      |      |      |      |
| <b>U_beauty</b>           | 0.04  |      |      |      |      |      |      | 0.04  |      |      |      |      |      |      |      |      |      |      |      |      |      |
| <b>J_beauty</b>           | 0.00  |      |      |      |      |      |      | 0.00  |      |      |      |      |      |      |      |      |      |      |      |      |      |
| <b>Dominance</b>          | 1.00  |      |      |      |      |      |      | 1.00  |      |      |      |      |      |      |      |      |      |      |      |      |      |
| <b>best_df</b>            | 3.00  |      |      |      |      |      |      | 3.00  |      |      |      |      |      |      |      |      |      |      |      |      |      |
| <b>p_value</b>            | 0.02  |      |      |      |      |      |      | 0.02  |      |      |      |      |      |      |      |      |      |      |      |      |      |
| <b>lr_stat</b>            | 16.38 |      |      |      |      |      |      | 16.38 |      |      |      |      |      |      |      |      |      |      |      |      |      |
| <b>linear_aic</b>         | 29.10 |      |      |      |      |      |      | 29.10 |      |      |      |      |      |      |      |      |      |      |      |      |      |
| <b>spline_aic</b>         | 26.72 |      |      |      |      |      |      | 26.72 |      |      |      |      |      |      |      |      |      |      |      |      |      |
| <b>min_age</b>            | 78.09 |      |      |      |      |      |      | 78.09 |      |      |      |      |      |      |      |      |      |      |      |      |      |
| <b>min_value</b>          | 3.01  |      |      |      |      |      |      | 3.01  |      |      |      |      |      |      |      |      |      |      |      |      |      |
| <b>amplitude</b>          | 1.96  |      |      |      |      |      |      | 1.96  |      |      |      |      |      |      |      |      |      |      |      |      |      |
| <b>delta_endpoints</b>    | -0.45 |      |      |      |      |      |      | -0.45 |      |      |      |      |      |      |      |      |      |      |      |      |      |
| <b>n_minima</b>           | 3.00  |      |      |      |      |      |      | 3.00  |      |      |      |      |      |      |      |      |      |      |      |      |      |
| <b>n_maxima</b>           | 4.00  |      |      |      |      |      |      | 4.00  |      |      |      |      |      |      |      |      |      |      |      |      |      |
| <b>turning_points</b>     | 7.00  |      |      |      |      |      |      | 7.00  |      |      |      |      |      |      |      |      |      |      |      |      |      |
| <b>r_trough</b>           | 0.81  |      |      |      |      |      |      | 0.81  |      |      |      |      |      |      |      |      |      |      |      |      |      |
| <b>interior_indicator</b> | True  |      |      |      |      |      |      | 1.00  |      |      |      |      |      |      |      |      |      |      |      |      |      |
| <b>trough_indicator</b>   | True  |      |      |      |      |      |      | 1.00  |      |      |      |      |      |      |      |      |      |      |      |      |      |
| <b>U_D_depth</b>          | 0.48  |      |      |      |      |      |      | 0.48  |      |      |      |      |      |      |      |      |      |      |      |      |      |
| <b>U_I_interiority</b>    | 0.21  |      |      |      |      |      |      | 0.21  |      |      |      |      |      |      |      |      |      |      |      |      |      |
| <b>U_M_monotonicity</b>   | 0.65  |      |      |      |      |      |      | 0.65  |      |      |      |      |      |      |      |      |      |      |      |      |      |
| <b>U_C_convexity</b>      | 0.80  |      |      |      |      |      |      | 0.80  |      |      |      |      |      |      |      |      |      |      |      |      |      |
| <b>U_S_symmetry</b>       | 0.81  |      |      |      |      |      |      | 0.81  |      |      |      |      |      |      |      |      |      |      |      |      |      |
| <b>J_R_rise</b>           | 0.00  |      |      |      |      |      |      | 0.00  |      |      |      |      |      |      |      |      |      |      |      |      |      |
| <b>J_M_monotonicity</b>   | 0.47  |      |      |      |      |      |      | 0.47  |      |      |      |      |      |      |      |      |      |      |      |      |      |
| <b>J_C_rightconvex</b>    | 0.54  |      |      |      |      |      |      | 0.54  |      |      |      |      |      |      |      |      |      |      |      |      |      |
| <b>P_turning</b>          | 0.01  |      |      |      |      |      |      | 0.01  |      |      |      |      |      |      |      |      |      |      |      |      |      |
| <b>final_structure</b>    | U     |      |      |      |      |      |      | U     |      |      |      |      |      |      |      |      |      |      |      |      |      |
| <b>U_supported</b>        | True  |      |      |      |      |      |      | 1.00  |      |      |      |      |      |      |      |      |      |      |      |      |      |
| <b>J_supported</b>        | False |      |      |      |      |      |      | 0.00  |      |      |      |      |      |      |      |      |      |      |      |      |      |

Table S6bs. Kosovo Cantril U-shape ratings, 2006-2024

| KPI                | Mean    | 2005 | 2006 | 2007 | 2008    | 2009 | 2010 | 2011  | 2012 | 2013 | 2014 | 2015    | 2016  | 2017    | 2018 | 2019 | 2020 | 2021 | 2022 | 2023  | 2024    |
|--------------------|---------|------|------|------|---------|------|------|-------|------|------|------|---------|-------|---------|------|------|------|------|------|-------|---------|
| shape_class        | neither |      |      |      | neither |      |      | U     |      |      |      | neither | U     | neither |      |      |      |      |      | U     | neither |
| U_beauty           | 0.04    |      |      |      | 0.00    |      |      | 0.09  |      |      |      | 0.00    | 0.00  | 0.00    |      |      |      |      |      | 0.15  | 0.00    |
| J_beauty           | 0.00    |      |      |      | 0.00    |      |      | 0.00  |      |      |      | 0.00    | 0.00  | 0.00    |      |      |      |      |      | 0.00  | 0.00    |
| Dominance          | -0.33   |      |      |      | -1.00   |      |      | 1.00  |      |      |      | -1.00   | -0.92 | -1.00   |      |      |      |      |      | 0.96  |         |
| best_df            | 4.57    |      |      |      | 5.00    |      |      | 3.00  |      |      |      | 5.00    | 5.00  | 4.00    |      |      |      |      |      | 5.00  | 5.00    |
| p_value            | 0.00    |      |      |      | 0.00    |      |      | 0.01  |      |      |      | 0.00    | 0.00  | 0.00    |      |      |      |      |      | 0.00  | 0.00    |
| lr_stat            | 38.38   |      |      |      | 26.23   |      |      | 18.71 |      |      |      | 59.43   | 70.85 | 36.32   |      |      |      |      |      | 25.79 | 31.33   |
| linear_aic         | 34.92   |      |      |      | 39.80   |      |      | 21.38 |      |      |      | 58.25   | 45.13 | 38.89   |      |      |      |      |      | 34.61 | 6.37    |
| spline_aic         | 13.68   |      |      |      | 31.58   |      |      | 16.68 |      |      |      | 16.82   | -7.72 | 18.57   |      |      |      |      |      | 26.82 | -6.96   |
| min_age            | 80.82   |      |      |      | 87.86   |      |      | 76.59 |      |      |      | 86.74   | 84.48 | 86.92   |      |      |      |      |      | 62.30 |         |
| min_value          | 4.49    |      |      |      | 3.61    |      |      | 4.08  |      |      |      | 4.00    | 4.40  | 4.69    |      |      |      |      |      | 6.18  |         |
| amplitude          | 3.16    |      |      |      | 3.37    |      |      | 1.38  |      |      |      | 6.00    | 3.93  | 3.30    |      |      |      |      |      | 2.41  | 1.72    |
| delta_endpoints    | 1.00    |      |      |      | 1.13    |      |      | -0.48 |      |      |      | 4.25    | 1.99  | 1.03    |      |      |      |      |      | 0.84  | -1.72   |
| n_minima           | 3.43    |      |      |      | 5.00    |      |      | 3.00  |      |      |      | 4.00    | 3.00  | 3.00    |      |      |      |      |      | 2.00  | 4.00    |
| n_maxima           | 3.29    |      |      |      | 4.00    |      |      | 3.00  |      |      |      | 4.00    | 3.00  | 2.00    |      |      |      |      |      | 3.00  | 4.00    |
| turning_points     | 6.71    |      |      |      | 9.00    |      |      | 6.00  |      |      |      | 8.00    | 6.00  | 5.00    |      |      |      |      |      | 5.00  | 8.00    |
| r_trough           | 0.87    |      |      |      | 0.94    |      |      | 0.79  |      |      |      | 0.93    | 0.90  | 0.93    |      |      |      |      |      | 0.60  | 1.00    |
| interior_indicator | False   |      |      |      | 0.00    |      |      | 1.00  |      |      |      | 0.00    | 1.00  | 0.00    |      |      |      |      |      | 1.00  | 0.00    |
| trough_indicator   | True    |      |      |      | 1.00    |      |      | 1.00  |      |      |      | 1.00    | 1.00  | 1.00    |      |      |      |      |      | 1.00  | 0.00    |
| U_D_depth          | 0.46    |      |      |      | 0.66    |      |      | 0.65  |      |      |      | 0.29    | 0.49  | 0.69    |      |      |      |      |      | 0.41  | 0.00    |
| U_I_interiority    | 0.14    |      |      |      | 0.00    |      |      | 0.26  |      |      |      | 0.00    | 0.00  | 0.00    |      |      |      |      |      | 0.74  | 0.00    |
| U_M_monotonicity   | 0.67    |      |      |      | 0.77    |      |      | 0.77  |      |      |      | 0.78    | 0.79  | 0.83    |      |      |      |      |      | 0.78  | 0.00    |
| U_C_convexity      | 0.63    |      |      |      | 0.65    |      |      | 0.81  |      |      |      | 0.63    | 0.87  | 0.72    |      |      |      |      |      | 0.75  | 0.00    |
| U_S_symmetry       | 0.60    |      |      |      | 0.80    |      |      | 0.79  |      |      |      | 0.45    | 0.66  | 0.82    |      |      |      |      |      | 0.70  | 0.00    |
| J_R_rise           | 0.32    |      |      |      | 0.34    |      |      | 0.00  |      |      |      | 0.71    | 0.51  | 0.31    |      |      |      |      |      | 0.35  | 0.00    |
| J_M_monotonicity   | 0.40    |      |      |      | 0.45    |      |      | 0.37  |      |      |      | 0.44    | 0.44  | 0.36    |      |      |      |      |      | 0.32  | 0.42    |
| J_C_rightconvex    | 0.51    |      |      |      | 0.58    |      |      | 0.53  |      |      |      | 0.57    | 0.70  | 0.48    |      |      |      |      |      | 0.50  | 0.24    |
| P_turning          | 0.03    |      |      |      | 0.00    |      |      | 0.03  |      |      |      | 0.01    | 0.03  | 0.06    |      |      |      |      |      | 0.06  | 0.01    |
| final_structure    | neither |      |      |      | neither |      |      | U     |      |      |      | neither | U     | neither |      |      |      |      |      | U     | neither |
| U_supported        | False   |      |      |      | 0.00    |      |      | 1.00  |      |      |      | 0.00    | 1.00  | 0.00    |      |      |      |      |      | 1.00  | 0.00    |
| J_supported        | False   |      |      |      | 0.00    |      |      | 0.00  |      |      |      | 0.00    | 0.00  | 0.00    |      |      |      |      |      | 0.00  | 0.00    |

Table S6bt. Kyrgyzstan Cantril U-shape ratings, 2006-2024

| KPI         | Mean | 2005 | 2006 | 2007 | 2008    | 2009 | 2010 | 2011 | 2012 | 2013 | 2014 | 2015 | 2016 | 2017  | 2018 | 2019 | 2020 | 2021    | 2022 | 2023    | 2024 |
|-------------|------|------|------|------|---------|------|------|------|------|------|------|------|------|-------|------|------|------|---------|------|---------|------|
| shape_class | U    |      | U    |      | neither | U    |      |      |      |      |      | U    |      | U     |      | U    |      | neither | U    | neither |      |
| U_beauty    | 0.02 |      | 0.09 |      | 0.00    | 0.06 |      |      |      |      |      | 0.00 |      | 0.01  |      | 0.02 |      | 0.00    | 0.05 | 0.00    |      |
| J_beauty    | 0.00 |      | 0.00 |      | 0.00    | 0.00 |      |      |      |      |      | 0.00 |      | 0.01  |      | 0.00 |      | 0.00    | 0.01 | 0.00    |      |
| Dominance   | 0.52 |      | 0.96 |      |         | 1.00 |      |      |      |      |      | 1.00 |      | -0.09 |      | 1.00 |      | -1.00   | 0.76 |         |      |
| best_df     | 4.56 |      | 4.00 |      | 5.00    | 4.00 |      |      |      |      |      | 5.00 |      | 3.00  |      | 5.00 |      | 5.00    | 5.00 | 5.00    |      |
| p_value     | 0.00 |      | 0.00 |      | 0.00    | 0.00 |      |      |      |      |      | 0.01 |      | 0.00  |      | 0.01 |      | 0.00    | 0.00 | 0.00    |      |

|                           |       |       |         |       |  |  |  |  |       |       |       |         |       |         |
|---------------------------|-------|-------|---------|-------|--|--|--|--|-------|-------|-------|---------|-------|---------|
| <b>lr_stat</b>            | 43.03 | 31.61 | 54.85   | 32.18 |  |  |  |  | 22.46 | 48.51 | 23.32 | 78.88   | 48.71 | 46.80   |
| <b>linear_aic</b>         | 26.80 | 14.93 | 2.40    | 22.86 |  |  |  |  | 24.37 | 34.76 | 20.11 | 68.02   | 31.11 | 22.62   |
| <b>spline_aic</b>         | 0.87  | -0.68 | -34.45  | 6.69  |  |  |  |  | 19.92 | 0.25  | 14.79 | 7.14    | 0.40  | -6.18   |
| <b>min_age</b>            | 80.72 | 78.28 | 88.24   | 76.77 |  |  |  |  | 80.35 | 82.04 | 80.72 | 87.49   | 71.89 |         |
| <b>min_value</b>          | 3.74  | 3.81  | 2.94    | 4.13  |  |  |  |  | 4.01  | 5.19  | 4.67  | -0.01   | 5.16  |         |
| <b>amplitude</b>          | 2.98  | 1.39  | 2.40    | 1.95  |  |  |  |  | 2.04  | 2.82  | 1.59  | 10.00   | 2.34  | 2.31    |
| <b>delta_endpoints</b>    | 0.22  | 0.14  | -1.31   | -0.68 |  |  |  |  | -1.14 | 2.22  | -0.61 | 4.06    | 1.55  | -2.22   |
| <b>n_minima</b>           | 3.11  | 2.00  | 2.00    | 3.00  |  |  |  |  | 4.00  | 3.00  | 4.00  | 4.00    | 3.00  | 3.00    |
| <b>n_maxima</b>           | 3.11  | 3.00  | 2.00    | 3.00  |  |  |  |  | 4.00  | 3.00  | 4.00  | 3.00    | 3.00  | 3.00    |
| <b>turning_points</b>     | 6.22  | 5.00  | 4.00    | 6.00  |  |  |  |  | 8.00  | 6.00  | 8.00  | 7.00    | 6.00  | 6.00    |
| <b>r_trough</b>           | 0.87  | 0.82  | 0.95    | 0.80  |  |  |  |  | 0.84  | 0.87  | 0.85  | 0.94    | 0.73  | 1.00    |
| <b>interior_indicator</b> | True  | 1.00  | 0.00    | 1.00  |  |  |  |  | 1.00  | 1.00  | 1.00  | 0.00    | 1.00  | 0.00    |
| <b>trough_indicator</b>   | True  | 1.00  | 1.00    | 1.00  |  |  |  |  | 1.00  | 1.00  | 1.00  | 1.00    | 1.00  | 0.00    |
| <b>U_D_depth</b>          | 0.37  | 0.76  | 0.44    | 0.45  |  |  |  |  | 0.00  | 0.21  | 0.52  | 0.59    | 0.34  | 0.00    |
| <b>U_I_interiority</b>    | 0.14  | 0.21  | 0.00    | 0.26  |  |  |  |  | 0.14  | 0.08  | 0.13  | 0.00    | 0.42  | 0.00    |
| <b>U_M_monotonicity</b>   | 0.65  | 0.72  | 0.94    | 0.75  |  |  |  |  | 0.63  | 0.78  | 0.62  | 0.75    | 0.67  | 0.00    |
| <b>U_C_convexity</b>      | 0.62  | 0.85  | 0.68    | 0.81  |  |  |  |  | 0.59  | 0.68  | 0.63  | 0.66    | 0.67  | 0.00    |
| <b>U_S_symmetry</b>       | 0.51  | 0.94  | 0.62    | 0.72  |  |  |  |  | 0.01  | 0.35  | 0.73  | 0.75    | 0.50  | 0.00    |
| <b>J_R_rise</b>           | 0.22  | 0.10  | 0.00    | 0.00  |  |  |  |  | 0.00  | 0.79  | 0.00  | 0.41    | 0.66  | 0.00    |
| <b>J_M_monotonicity</b>   | 0.43  | 0.46  | 0.16    | 0.35  |  |  |  |  | 0.46  | 0.48  | 0.51  | 0.47    | 0.51  | 0.44    |
| <b>J_C_rightconvex</b>    | 0.54  | 0.60  | 0.48    | 0.55  |  |  |  |  | 0.47  | 0.68  | 0.50  | 0.50    | 0.61  | 0.46    |
| <b>P_turning</b>          | 0.04  | 0.06  | 0.12    | 0.03  |  |  |  |  | 0.01  | 0.03  | 0.01  | 0.01    | 0.03  | 0.03    |
| <b>final_structure</b>    | U     | U     | neither | U     |  |  |  |  | U     | U     | U     | neither | U     | neither |
| <b>U_supported</b>        | True  | 1.00  | 0.00    | 1.00  |  |  |  |  | 1.00  | 1.00  | 1.00  | 0.00    | 1.00  | 0.00    |
| <b>J_supported</b>        | False | 0.00  | 0.00    | 0.00  |  |  |  |  | 0.00  | 0.00  | 0.00  | 0.00    | 0.00  | 0.00    |

Table S6bu. Laos Cantril U-shape ratings, 2006-2024

| KPI                    | Mean    | 2005 | 2006 | 2007 | 2008 | 2009 | 2010 | 2011 | 2012  | 2013 | 2014 | 2015 | 2016 | 2017 | 2018    | 2019 | 2020 | 2021 | 2022 | 2023 | 2024    |
|------------------------|---------|------|------|------|------|------|------|------|-------|------|------|------|------|------|---------|------|------|------|------|------|---------|
| <b>shape_class</b>     | neither |      |      |      |      |      |      |      | U     |      |      |      |      |      | neither |      |      |      |      |      | neither |
| <b>U_beauty</b>        | 0.02    |      |      |      |      |      |      |      | 0.05  |      |      |      |      |      | 0.00    |      |      |      |      |      | 0.00    |
| <b>J_beauty</b>        | 0.01    |      |      |      |      |      |      |      | 0.02  |      |      |      |      |      | 0.00    |      |      |      |      |      | 0.00    |
| <b>Dominance</b>       | -0.53   |      |      |      |      |      |      |      | 0.42  |      |      |      |      |      | -1.00   |      |      |      |      |      | -1.00   |
| <b>best_df</b>         | 4.33    |      |      |      |      |      |      |      | 3.00  |      |      |      |      |      | 5.00    |      |      |      |      |      | 5.00    |
| <b>p_value</b>         | 0.00    |      |      |      |      |      |      |      | 0.00  |      |      |      |      |      | 0.00    |      |      |      |      |      | 0.00    |
| <b>lr_stat</b>         | 32.10   |      |      |      |      |      |      |      | 24.66 |      |      |      |      |      | 46.68   |      |      |      |      |      | 24.94   |
| <b>linear_aic</b>      | 28.27   |      |      |      |      |      |      |      | 28.49 |      |      |      |      |      | 38.83   |      |      |      |      |      | 17.51   |
| <b>spline_aic</b>      | 12.85   |      |      |      |      |      |      |      | 17.83 |      |      |      |      |      | 10.15   |      |      |      |      |      | 10.56   |
| <b>min_age</b>         | 58.17   |      |      |      |      |      |      |      | 66.06 |      |      |      |      |      | 87.11   |      |      |      |      |      | 21.32   |
| <b>min_value</b>       | 4.63    |      |      |      |      |      |      |      | 4.63  |      |      |      |      |      | 4.26    |      |      |      |      |      | 5.01    |
| <b>amplitude</b>       | 2.71    |      |      |      |      |      |      |      | 2.43  |      |      |      |      |      | 3.73    |      |      |      |      |      | 1.97    |
| <b>delta_endpoints</b> | 1.83    |      |      |      |      |      |      |      | 1.93  |      |      |      |      |      | 3.03    |      |      |      |      |      | 0.54    |
| <b>n_minima</b>        | 3.67    |      |      |      |      |      |      |      | 3.00  |      |      |      |      |      | 4.00    |      |      |      |      |      | 4.00    |
| <b>n_maxima</b>        | 2.67    |      |      |      |      |      |      |      | 2.00  |      |      |      |      |      | 3.00    |      |      |      |      |      | 3.00    |
| <b>turning_points</b>  | 6.33    |      |      |      |      |      |      |      | 5.00  |      |      |      |      |      | 7.00    |      |      |      |      |      | 7.00    |

|                           |         |      |         |         |
|---------------------------|---------|------|---------|---------|
| <b>r_trough</b>           | 0.55    | 0.65 | 0.93    | 0.06    |
| <b>interior_indicator</b> | False   | 1.00 | 0.00    | 0.00    |
| <b>trough_indicator</b>   | True    | 1.00 | 1.00    | 1.00    |
| <b>U_D_depth</b>          | 0.21    | 0.21 | 0.19    | 0.23    |
| <b>U_I_interiority</b>    | 0.20    | 0.61 | 0.00    | 0.00    |
| <b>U_M_monotonicity</b>   | 0.75    | 0.77 | 0.69    | 0.79    |
| <b>U_C_convexity</b>      | 0.75    | 0.92 | 0.65    | 0.67    |
| <b>U_S_symmetry</b>       | 0.43    | 0.35 | 0.32    | 0.62    |
| <b>J_R_rise</b>           | 0.63    | 0.79 | 0.81    | 0.27    |
| <b>J_M_monotonicity</b>   | 0.59    | 0.62 | 0.56    | 0.59    |
| <b>J_C_rightconvex</b>    | 0.54    | 0.58 | 0.56    | 0.49    |
| <b>P_turning</b>          | 0.03    | 0.06 | 0.01    | 0.01    |
| <b>final_structure</b>    | neither | U    | neither | neither |
| <b>U_supported</b>        | False   | 1.00 | 0.00    | 0.00    |
| <b>J_supported</b>        | False   | 0.00 | 0.00    | 0.00    |

Table S6bv. Latvia Cantril U-shape ratings, 2006-2024

| KPI                       | Mean  | 2005 | 2006 | 2007 | 2008 | 2009  | 2010 | 2011    | 2012    | 2013 | 2014    | 2015 | 2016  | 2017  | 2018   | 2019    | 2020  | 2021 | 2022 | 2023 | 2024    |
|---------------------------|-------|------|------|------|------|-------|------|---------|---------|------|---------|------|-------|-------|--------|---------|-------|------|------|------|---------|
| <b>shape_class</b>        | U     |      |      |      |      | U     |      | neither | neither |      | neither |      | U     | U     | U      | neither | U     |      |      |      | neither |
| <b>U_beauty</b>           | 0.01  |      |      |      |      | 0.02  |      | 0.00    | 0.00    |      | 0.00    |      | 0.07  | 0.00  | 0.00   | 0.00    | 0.03  |      |      |      | 0.00    |
| <b>J_beauty</b>           | 0.00  |      |      |      |      | 0.00  |      | 0.00    | 0.00    |      | 0.00    |      | 0.00  | 0.00  | 0.00   | 0.00    | 0.00  |      |      |      | 0.00    |
| <b>Dominance</b>          | 0.35  |      |      |      |      | 0.97  |      |         | -1.00   |      |         |      | 0.92  | -0.74 | 1.00   |         | 0.93  |      |      |      |         |
| <b>best_df</b>            | 4.10  |      |      |      |      | 5.00  |      | 3.00    | 3.00    |      | 4.00    |      | 3.00  | 3.00  | 5.00   | 5.00    | 5.00  |      |      |      | 5.00    |
| <b>p_value</b>            | 0.00  |      |      |      |      | 0.00  |      | 0.00    | 0.00    |      | 0.00    |      | 0.00  | 0.00  | 0.00   | 0.00    | 0.00  |      |      |      | 0.00    |
| <b>lr_stat</b>            | 41.77 |      |      |      |      | 54.92 |      | 44.93   | 36.59   |      | 43.44   |      | 39.65 | 30.12 | 41.69  | 46.18   | 45.58 |      |      |      | 34.63   |
| <b>linear_aic</b>         | 30.00 |      |      |      |      | 60.94 |      | 41.50   | 31.11   |      | 20.05   |      | 30.18 | 25.87 | 7.14   | 19.23   | 49.45 |      |      |      | 14.53   |
| <b>spline_aic</b>         | 4.43  |      |      |      |      | 24.02 |      | 10.57   | 8.51    |      | -7.40   |      | 4.53  | 9.75  | -16.55 | -8.96   | 21.87 |      |      |      | -2.10   |
| <b>min_age</b>            | 81.80 |      |      |      |      | 77.90 |      |         | 84.86   |      | 85.05   |      | 80.72 | 84.48 | 81.47  |         | 78.09 |      |      |      |         |
| <b>min_value</b>          | 4.56  |      |      |      |      | 3.55  |      |         | 4.53    |      | 4.26    |      | 4.63  | 4.58  | 4.93   |         | 5.39  |      |      |      |         |
| <b>amplitude</b>          | 3.23  |      |      |      |      | 7.09  |      | 5.21    | 1.91    |      | 2.36    |      | 2.40  | 2.17  | 1.52   | 2.52    | 5.04  |      |      |      | 2.06    |
| <b>delta_endpoints</b>    | -0.74 |      |      |      |      | 1.43  |      | -5.21   | 0.39    |      | -0.88   |      | 0.45  | 0.48  | -0.77  | -2.43   | 1.07  |      |      |      | -1.89   |
| <b>n_minima</b>           | 3.10  |      |      |      |      | 4.00  |      | 3.00    | 3.00    |      | 2.00    |      | 3.00  | 3.00  | 2.00   | 4.00    | 3.00  |      |      |      | 4.00    |
| <b>n_maxima</b>           | 3.00  |      |      |      |      | 4.00  |      | 3.00    | 2.00    |      | 1.00    |      | 2.00  | 3.00  | 3.00   | 5.00    | 3.00  |      |      |      | 4.00    |
| <b>turning_points</b>     | 6.10  |      |      |      |      | 8.00  |      | 6.00    | 5.00    |      | 3.00    |      | 5.00  | 6.00  | 5.00   | 9.00    | 6.00  |      |      |      | 8.00    |
| <b>r_trough</b>           | 0.90  |      |      |      |      | 0.81  |      | 1.00    | 0.90    |      | 0.91    |      | 0.85  | 0.90  | 0.86   | 1.00    | 0.81  |      |      |      | 1.00    |
| <b>interior_indicator</b> | True  |      |      |      |      | 1.00  |      | 0.00    | 0.00    |      | 0.00    |      | 1.00  | 1.00  | 1.00   | 0.00    | 1.00  |      |      |      | 0.00    |
| <b>trough_indicator</b>   | True  |      |      |      |      | 1.00  |      | 0.00    | 1.00    |      | 1.00    |      | 1.00  | 1.00  | 1.00   | 0.00    | 1.00  |      |      |      | 0.00    |
| <b>U_D_depth</b>          | 0.34  |      |      |      |      | 0.29  |      | 0.00    | 0.80    |      | 0.63    |      | 0.81  | 0.57  | 0.05   | 0.00    | 0.31  |      |      |      | 0.00    |
| <b>U_I_interiority</b>    | 0.07  |      |      |      |      | 0.22  |      | 0.00    | 0.00    |      | 0.00    |      | 0.13  | 0.00  | 0.10   | 0.00    | 0.21  |      |      |      | 0.00    |
| <b>U_M_monotonicity</b>   | 0.56  |      |      |      |      | 0.69  |      | 0.00    | 0.85    |      | 0.95    |      | 0.84  | 0.82  | 0.71   | 0.00    | 0.76  |      |      |      | 0.00    |
| <b>U_C_convexity</b>      | 0.53  |      |      |      |      | 0.66  |      | 0.00    | 0.74    |      | 0.69    |      | 1.00  | 0.81  | 0.63   | 0.00    | 0.67  |      |      |      | 0.13    |
| <b>U_S_symmetry</b>       | 0.50  |      |      |      |      | 0.74  |      | 0.00    | 0.89    |      | 0.77    |      | 0.90  | 0.84  | 0.16   | 0.00    | 0.74  |      |      |      | 0.00    |
| <b>J_R_rise</b>           | 0.10  |      |      |      |      | 0.20  |      | 0.00    | 0.20    |      | 0.00    |      | 0.19  | 0.22  | 0.00   | 0.00    | 0.21  |      |      |      | 0.00    |
| <b>J_M_monotonicity</b>   | 0.36  |      |      |      |      | 0.45  |      | 0.31    | 0.35    |      | 0.19    |      | 0.40  | 0.39  | 0.32   | 0.42    | 0.35  |      |      |      | 0.42    |

|                        |       |      |         |         |         |      |      |      |         |      |         |
|------------------------|-------|------|---------|---------|---------|------|------|------|---------|------|---------|
| <b>J_C_rightconvex</b> | 0.57  | 0.52 | 0.42    | 0.58    | 0.65    | 1.00 | 0.65 | 0.50 | 0.43    | 0.53 | 0.43    |
| <b>P_turning</b>       | 0.05  | 0.01 | 0.03    | 0.06    | 0.25    | 0.06 | 0.03 | 0.06 | 0.00    | 0.03 | 0.01    |
| <b>final_structure</b> | U     | U    | neither | neither | neither | U    | U    | U    | neither | U    | neither |
| <b>U_supported</b>     | True  | 1.00 | 0.00    | 0.00    | 0.00    | 1.00 | 1.00 | 1.00 | 0.00    | 1.00 | 0.00    |
| <b>J_supported</b>     | False | 0.00 | 0.00    | 0.00    | 0.00    | 0.00 | 0.00 | 0.00 | 0.00    | 0.00 | 0.00    |

Table S6bw. Lebanon Cantril U-shape ratings, 2006-2024

| KPI                       | Mean  | 2005 | 2006 | 2007 | 2008 | 2009 | 2010 | 2011 | 2012 | 2013  | 2014 | 2015 | 2016 | 2017    | 2018  | 2019 | 2020 | 2021  | 2022 | 2023  | 2024    |         |
|---------------------------|-------|------|------|------|------|------|------|------|------|-------|------|------|------|---------|-------|------|------|-------|------|-------|---------|---------|
| <b>shape_class</b>        | U     |      |      |      |      |      |      |      |      | U     |      |      |      | neither | U     |      |      | U     |      | U     | neither | neither |
| <b>U_beauty</b>           | 0.03  |      |      |      |      |      |      |      |      | 0.01  |      |      |      | 0.00    | 0.14  |      |      | 0.01  |      | 0.05  | 0.00    | 0.00    |
| <b>J_beauty</b>           | 0.01  |      |      |      |      |      |      |      |      | 0.00  |      |      |      | 0.00    | 0.00  |      |      | 0.04  |      | 0.00  | 0.00    | 0.01    |
| <b>Dominance</b>          | 0.13  |      |      |      |      |      |      |      |      | 0.39  |      |      |      |         | 1.00  |      |      | -0.62 |      | 0.87  |         | -1.00   |
| <b>best_df</b>            | 3.29  |      |      |      |      |      |      |      |      | 3.00  |      |      |      | 4.00    | 3.00  |      |      | 3.00  |      | 3.00  | 4.00    | 3.00    |
| <b>p_value</b>            | 0.01  |      |      |      |      |      |      |      |      | 0.00  |      |      |      | 0.00    | 0.04  |      |      | 0.00  |      | 0.00  | 0.00    | 0.00    |
| <b>lr_stat</b>            | 36.18 |      |      |      |      |      |      |      |      | 30.35 |      |      |      | 53.68   | 14.45 |      |      | 63.62 |      | 22.37 | 27.52   | 41.28   |
| <b>linear_aic</b>         | 31.78 |      |      |      |      |      |      |      |      | 44.23 |      |      |      | 24.79   | 26.48 |      |      | 65.33 |      | 5.20  | 20.55   | 35.91   |
| <b>spline_aic</b>         | 10.18 |      |      |      |      |      |      |      |      | 27.88 |      |      |      | -12.90  | 26.03 |      |      | 15.72 |      | -3.17 | 9.03    | 8.63    |
| <b>min_age</b>            | 82.36 |      |      |      |      |      |      |      |      | 83.92 |      |      |      | 91.06   | 67.75 |      |      | 82.23 |      | 76.02 | 90.31   | 85.23   |
| <b>min_value</b>          | 2.83  |      |      |      |      |      |      |      |      | 3.86  |      |      |      | 2.94    | 4.29  |      |      | 2.77  |      | 2.15  | 1.91    | 1.87    |
| <b>amplitude</b>          | 3.25  |      |      |      |      |      |      |      |      | 3.20  |      |      |      | 3.35    | 2.10  |      |      | 7.30  |      | 0.98  | 2.71    | 3.13    |
| <b>delta_endpoints</b>    | 0.12  |      |      |      |      |      |      |      |      | 0.96  |      |      |      | -3.30   | -1.32 |      |      | 5.29  |      | 0.43  | -2.64   | 1.45    |
| <b>n_minima</b>           | 2.71  |      |      |      |      |      |      |      |      | 3.00  |      |      |      | 2.00    | 2.00  |      |      | 2.00  |      | 3.00  | 4.00    | 3.00    |
| <b>n_maxima</b>           | 1.86  |      |      |      |      |      |      |      |      | 2.00  |      |      |      | 1.00    | 1.00  |      |      | 1.00  |      | 3.00  | 3.00    | 2.00    |
| <b>turning_points</b>     | 4.57  |      |      |      |      |      |      |      |      | 5.00  |      |      |      | 3.00    | 3.00  |      |      | 3.00  |      | 6.00  | 7.00    | 5.00    |
| <b>r_trough</b>           | 0.87  |      |      |      |      |      |      |      |      | 0.89  |      |      |      | 0.99    | 0.68  |      |      | 0.87  |      | 0.79  | 0.98    | 0.91    |
| <b>interior_indicator</b> | True  |      |      |      |      |      |      |      |      | 1.00  |      |      |      | 0.00    | 1.00  |      |      | 1.00  |      | 1.00  | 0.00    | 0.00    |
| <b>trough_indicator</b>   | True  |      |      |      |      |      |      |      |      | 1.00  |      |      |      | 1.00    | 1.00  |      |      | 1.00  |      | 1.00  | 1.00    | 1.00    |
| <b>U_D_depth</b>          | 0.34  |      |      |      |      |      |      |      |      | 0.70  |      |      |      | 0.02    | 0.37  |      |      | 0.28  |      | 0.43  | 0.03    | 0.54    |
| <b>U_I_interiority</b>    | 0.13  |      |      |      |      |      |      |      |      | 0.02  |      |      |      | 0.00    | 0.56  |      |      | 0.08  |      | 0.28  | 0.00    | 0.00    |
| <b>U_M_monotonicity</b>   | 0.83  |      |      |      |      |      |      |      |      | 0.84  |      |      |      | 0.92    | 0.93  |      |      | 0.84  |      | 0.70  | 0.78    | 0.80    |
| <b>U_C_convexity</b>      | 0.81  |      |      |      |      |      |      |      |      | 0.70  |      |      |      | 0.78    | 0.97  |      |      | 0.66  |      | 0.86  | 0.94    | 0.78    |
| <b>U_S_symmetry</b>       | 0.46  |      |      |      |      |      |      |      |      | 0.82  |      |      |      | 0.03    | 0.54  |      |      | 0.43  |      | 0.67  | 0.05    | 0.70    |
| <b>J_R_rise</b>           | 0.28  |      |      |      |      |      |      |      |      | 0.30  |      |      |      | 0.00    | 0.00  |      |      | 0.72  |      | 0.44  | 0.00    | 0.46    |
| <b>J_M_monotonicity</b>   | 0.38  |      |      |      |      |      |      |      |      | 0.37  |      |      |      | 0.17    | 0.41  |      |      | 0.38  |      | 0.51  | 0.40    | 0.41    |
| <b>J_C_rightconvex</b>    | 0.55  |      |      |      |      |      |      |      |      | 0.59  |      |      |      | 0.39    | 0.63  |      |      | 0.65  |      | 0.54  | 0.46    | 0.59    |
| <b>P_turning</b>          | 0.13  |      |      |      |      |      |      |      |      | 0.06  |      |      |      | 0.25    | 0.25  |      |      | 0.25  |      | 0.03  | 0.01    | 0.06    |
| <b>final_structure</b>    | U     |      |      |      |      |      |      |      |      | U     |      |      |      | neither | U     |      |      | U     |      | U     | neither | neither |
| <b>U_supported</b>        | True  |      |      |      |      |      |      |      |      | 1.00  |      |      |      | 0.00    | 1.00  |      |      | 1.00  |      | 1.00  | 0.00    | 0.00    |
| <b>J_supported</b>        | False |      |      |      |      |      |      |      |      | 0.00  |      |      |      | 0.00    | 0.00  |      |      | 0.00  |      | 0.00  | 0.00    | 0.00    |

Table S6bx. Lesotho Cantril U-shape ratings, 2006-2024

| KPI                | Mean    | 2005 | 2006 | 2007 | 2008 | 2009 | 2010 | 2011    | 2012 | 2013 | 2014 | 2015 | 2016  | 2017  | 2018 | 2019    | 2020 | 2021 | 2022 | 2023 | 2024    |
|--------------------|---------|------|------|------|------|------|------|---------|------|------|------|------|-------|-------|------|---------|------|------|------|------|---------|
| shape_class        | neither |      |      |      |      |      |      | neither |      |      |      |      | U     | U     |      | neither |      |      |      |      |         |
| U_beauty           | 0.01    |      |      |      |      |      |      | 0.00    |      |      |      |      | 0.02  | 0.02  |      | 0.00    |      |      |      |      | 0.00    |
| J_beauty           | 0.00    |      |      |      |      |      |      | 0.00    |      |      |      |      | 0.00  | 0.00  |      | 0.00    |      |      |      |      | 0.00    |
| Dominance          | 1.00    |      |      |      |      |      |      |         |      |      |      |      | 1.00  | 1.00  |      |         |      |      |      |      |         |
| best_df            | 4.17    |      |      |      |      |      |      | 5.00    |      |      |      |      | 5.00  | 5.00  |      | 4.00    |      |      |      |      | 3.00    |
| p_value            | 0.03    |      |      |      |      |      |      | 0.00    |      |      |      |      | 0.00  | 0.11  |      | 0.00    |      |      |      |      | 0.00    |
| lr_stat            | 29.13   |      |      |      |      |      |      | 43.29   |      |      |      |      | 25.68 | 14.47 |      | 35.00   |      |      |      |      | 41.75   |
| linear_aic         | 30.17   |      |      |      |      |      |      | 36.08   |      |      |      |      | 24.99 | 26.24 |      | 33.03   |      |      |      |      | 40.38   |
| spline_aic         | 17.37   |      |      |      |      |      |      | 10.79   |      |      |      |      | 17.31 | 29.77 |      | 14.03   |      |      |      |      | 12.63   |
| min_age            | 84.81   |      |      |      |      |      |      |         |      |      |      |      | 80.91 | 82.98 |      | 86.55   |      |      |      |      |         |
| min_value          | 2.37    |      |      |      |      |      |      |         |      |      |      |      | 2.86  | 2.53  |      | 2.09    |      |      |      |      |         |
| amplitude          | 2.74    |      |      |      |      |      |      | 2.87    |      |      |      |      | 1.77  | 2.00  |      | 3.04    |      |      |      |      | 3.25    |
| delta_endpoints    | -1.86   |      |      |      |      |      |      | -2.64   |      |      |      |      | -0.87 | -0.54 |      | -1.37   |      |      |      |      | -2.76   |
| n_minima           | 3.00    |      |      |      |      |      |      | 3.00    |      |      |      |      | 3.00  | 4.00  |      | 3.00    |      |      |      |      | 1.00    |
| n_maxima           | 2.83    |      |      |      |      |      |      | 3.00    |      |      |      |      | 4.00  | 3.00  |      | 2.00    |      |      |      |      | 2.00    |
| turning_points     | 5.83    |      |      |      |      |      |      | 6.00    |      |      |      |      | 7.00  | 7.00  |      | 5.00    |      |      |      |      | 3.00    |
| r_trough           | 0.94    |      |      |      |      |      |      | 1.00    |      |      |      |      | 0.85  | 0.88  |      | 0.93    |      |      |      |      | 1.00    |
| interior_indicator | False   |      |      |      |      |      |      | 0.00    |      |      |      |      | 1.00  | 1.00  |      | 0.00    |      |      |      |      | 0.00    |
| trough_indicator   | True    |      |      |      |      |      |      | 0.00    |      |      |      |      | 1.00  | 1.00  |      | 1.00    |      |      |      |      | 0.00    |
| U_D_depth          | 0.32    |      |      |      |      |      |      | 0.00    |      |      |      |      | 0.50  | 0.73  |      | 0.55    |      |      |      |      | 0.00    |
| U_I_interiority    | 0.03    |      |      |      |      |      |      | 0.00    |      |      |      |      | 0.12  | 0.05  |      | 0.00    |      |      |      |      | 0.00    |
| U_M_monotonicity   | 0.53    |      |      |      |      |      |      | 0.00    |      |      |      |      | 0.74  | 0.78  |      | 0.86    |      |      |      |      | 0.00    |
| U_C_convexity      | 0.49    |      |      |      |      |      |      | 0.00    |      |      |      |      | 0.59  | 0.86  |      | 0.68    |      |      |      |      | 0.00    |
| U_S_symmetry       | 0.41    |      |      |      |      |      |      | 0.00    |      |      |      |      | 0.67  | 0.84  |      | 0.71    |      |      |      |      | 0.00    |
| J_R_rise           | 0.00    |      |      |      |      |      |      | 0.00    |      |      |      |      | 0.00  | 0.00  |      | 0.00    |      |      |      |      | 0.00    |
| J_M_monotonicity   | 0.38    |      |      |      |      |      |      | 0.47    |      |      |      |      | 0.36  | 0.46  |      | 0.32    |      |      |      |      | 0.30    |
| J_C_rightconvex    | 0.46    |      |      |      |      |      |      | 0.53    |      |      |      |      | 0.47  | 0.70  |      | 0.59    |      |      |      |      | 0.00    |
| P_turning          | 0.06    |      |      |      |      |      |      | 0.03    |      |      |      |      | 0.01  | 0.01  |      | 0.06    |      |      |      |      | 0.25    |
| final_structure    | neither |      |      |      |      |      |      | neither |      |      |      |      | U     | U     |      | neither |      |      |      |      | neither |
| U_supported        | False   |      |      |      |      |      |      | 0.00    |      |      |      |      | 1.00  | 1.00  |      | 0.00    |      |      |      |      | 0.00    |
| J_supported        | False   |      |      |      |      |      |      | 0.00    |      |      |      |      | 0.00  | 0.00  |      | 0.00    |      |      |      |      | 0.00    |

Table S6by. Liberia Cantril U-shape ratings, 2006-2024

| KPI         | Mean | 2005 | 2006 | 2007 | 2008 | 2009 | 2010 | 2011 | 2012 | 2013 | 2014 | 2015 | 2016 | 2017    | 2018 | 2019 | 2020 | 2021 | 2022 | 2023 | 2024 |
|-------------|------|------|------|------|------|------|------|------|------|------|------|------|------|---------|------|------|------|------|------|------|------|
| shape_class | U    |      |      |      |      |      |      |      |      |      |      |      |      | neither |      |      |      |      |      |      | U    |
| U_beauty    | 0.05 |      |      |      |      |      |      |      |      |      |      |      |      | 0.00    |      |      |      |      |      |      | 0.10 |
| J_beauty    | 0.00 |      |      |      |      |      |      |      |      |      |      |      |      | 0.00    |      |      |      |      |      |      | 0.00 |
| Dominance   | 0.00 |      |      |      |      |      |      |      |      |      |      |      |      | -1.00   |      |      |      |      |      |      | 0.99 |
| best_df     | 5.00 |      |      |      |      |      |      |      |      |      |      |      |      | 5.00    |      |      |      |      |      |      | 5.00 |
| p_value     | 0.00 |      |      |      |      |      |      |      |      |      |      |      |      | 0.00    |      |      |      |      |      |      | 0.00 |

|                    |       |         |       |
|--------------------|-------|---------|-------|
| lr_stat            | 30.40 | 36.43   | 24.36 |
| linear_aic         | 63.24 | 63.56   | 62.93 |
| spline_aic         | 50.85 | 45.13   | 56.56 |
| min_age            | 76.02 | 88.80   | 63.24 |
| min_value          | 1.14  | -0.05   | 2.33  |
| amplitude          | 7.31  | 8.34    | 6.29  |
| delta_endpoints    | 2.18  | 1.37    | 2.99  |
| n_minima           | 4.50  | 5.00    | 4.00  |
| n_maxima           | 4.50  | 4.00    | 5.00  |
| turning_points     | 9.00  | 9.00    | 9.00  |
| r_trough           | 0.79  | 0.96    | 0.62  |
| interior_indicator | False | 0.00    | 1.00  |
| trough_indicator   | True  | 1.00    | 1.00  |
| U_D_depth          | 0.50  | 0.56    | 0.43  |
| U_I_interiority    | 0.35  | 0.00    | 0.71  |
| U_M_monotonicity   | 0.70  | 0.77    | 0.64  |
| U_C_convexity      | 0.65  | 0.65    | 0.65  |
| U_S_symmetry       | 0.76  | 0.87    | 0.64  |
| J_R_rise           | 0.32  | 0.16    | 0.48  |
| J_M_monotonicity   | 0.46  | 0.44    | 0.49  |
| J_C_rightconvex    | 0.51  | 0.53    | 0.48  |
| P_turning          | 0.00  | 0.00    | 0.00  |
| final_structure    | U     | neither | U     |
| U_supported        | False | 0.00    | 1.00  |
| J_supported        | False | 0.00    | 0.00  |

Table S6bz. Lithuania Cantril U-shape ratings, 2006-2024

| KPI             | Mean    | 2005 | 2006 | 2007 | 2008 | 2009 | 2010  | 2011  | 2012    | 2013 | 2014    | 2015 | 2016 | 2017    | 2018    | 2019    | 2020    | 2021   | 2022    | 2023    | 2024    |
|-----------------|---------|------|------|------|------|------|-------|-------|---------|------|---------|------|------|---------|---------|---------|---------|--------|---------|---------|---------|
| shape_class     | neither |      |      |      |      |      | U     | U     | neither |      | neither |      |      | neither | neither | neither | neither | U      | neither | neither | neither |
| U_beauty        | 0.02    |      |      |      |      |      | 0.07  | 0.16  | 0.00    |      | 0.00    |      |      | 0.00    | 0.00    | 0.00    | 0.00    | 0.07   | 0.00    | 0.00    | 0.00    |
| J_beauty        | 0.00    |      |      |      |      |      | 0.00  | 0.00  | 0.00    |      | 0.00    |      |      | 0.00    | 0.00    | 0.00    | 0.00    | 0.00   | 0.00    | 0.00    | 0.00    |
| Dominance       | 0.18    |      |      |      |      |      | 1.00  | 0.98  |         |      |         |      |      | -1.00   |         |         |         | 0.94   |         |         | -1.00   |
| best_df         | 4.75    |      |      |      |      |      | 5.00  | 5.00  | 5.00    |      | 4.00    |      |      | 5.00    | 3.00    | 5.00    | 5.00    | 5.00   | 5.00    | 5.00    | 5.00    |
| p_value         | 0.03    |      |      |      |      |      | 0.01  | 0.00  | 0.00    |      | 0.00    |      |      | 0.01    | 0.29    | 0.00    | 0.00    | 0.00   | 0.00    | 0.00    | 0.00    |
| lr_stat         | 45.35   |      |      |      |      |      | 20.76 | 48.90 | 67.21   |      | 76.41   |      |      | 21.14   | 8.54    | 39.80   | 44.45   | 71.61  | 37.88   | 58.48   | 48.98   |
| linear_aic      | 25.30   |      |      |      |      |      | 15.25 | 32.10 | 21.28   |      | 44.64   |      |      | 24.06   | 2.70    | 15.14   | 25.19   | 39.73  | 19.73   | 36.35   | 27.45   |
| spline_aic      | -2.54   |      |      |      |      |      | 12.49 | 1.20  | -27.93  |      | -15.77  |      |      | 20.91   | 8.17    | -6.65   | -1.27   | -13.87 | -0.14   | -4.13   | -3.52   |
| min_age         | 80.66   |      |      |      |      |      | 46.51 | 72.64 | 85.42   |      |         |      |      | 87.49   |         | 90.50   | 88.80   | 80.91  | 87.68   |         | 85.98   |
| min_value       | 4.66    |      |      |      |      |      | 4.61  | 4.73  | 3.42    |      |         |      |      | 5.48    |         | 4.16    | 3.73    | 5.66   | 4.15    |         | 6.01    |
| amplitude       | 3.17    |      |      |      |      |      | 1.32  | 2.27  | 3.42    |      | 5.13    |      |      | 1.51    | 2.12    | 3.33    | 3.21    | 3.34   | 4.28    | 5.84    | 2.32    |
| delta_endpoints | -1.75   |      |      |      |      |      | -0.94 | 0.67  | -1.84   |      | -4.95   |      |      | 0.80    | -2.12   | -3.25   | -1.80   | 0.69   | -3.42   | -5.84   | 0.97    |
| n_minima        | 3.25    |      |      |      |      |      | 4.00  | 4.00  | 4.00    |      | 2.00    |      |      | 5.00    | 1.00    | 4.00    | 4.00    | 3.00   | 2.00    | 3.00    | 3.00    |
| n_maxima        | 2.67    |      |      |      |      |      | 4.00  | 3.00  | 3.00    |      | 3.00    |      |      | 4.00    | 1.00    | 3.00    | 3.00    | 2.00   | 1.00    | 3.00    | 2.00    |
| turning_points  | 5.92    |      |      |      |      |      | 8.00  | 7.00  | 7.00    |      | 5.00    |      |      | 9.00    | 2.00    | 7.00    | 7.00    | 5.00   | 3.00    | 6.00    | 5.00    |

|                           |         |      |      |         |         |         |         |         |         |      |         |         |         |
|---------------------------|---------|------|------|---------|---------|---------|---------|---------|---------|------|---------|---------|---------|
| <b>r_trough</b>           | 0.89    | 0.39 | 0.74 | 0.91    | 1.00    | 0.94    | 1.00    | 0.98    | 0.96    | 0.85 | 0.94    | 1.00    | 0.92    |
| <b>interior_indicator</b> | False   | 1.00 | 1.00 | 0.00    | 0.00    | 0.00    | 0.00    | 0.00    | 0.00    | 1.00 | 0.00    | 0.00    | 0.00    |
| <b>trough_indicator</b>   | True    | 1.00 | 1.00 | 1.00    | 0.00    | 1.00    | 0.00    | 1.00    | 1.00    | 1.00 | 1.00    | 0.00    | 1.00    |
| <b>U_D_depth</b>          | 0.33    | 0.29 | 0.70 | 0.46    | 0.00    | 0.47    | 0.00    | 0.02    | 0.39    | 0.79 | 0.20    | 0.00    | 0.58    |
| <b>U_I_interiority</b>    | 0.10    | 0.73 | 0.40 | 0.00    | 0.00    | 0.00    | 0.00    | 0.00    | 0.00    | 0.12 | 0.00    | 0.00    | 0.00    |
| <b>U_M_monotonicity</b>   | 0.62    | 0.69 | 0.80 | 0.86    | 0.00    | 0.72    | 0.00    | 0.83    | 0.81    | 0.89 | 0.95    | 0.00    | 0.86    |
| <b>U_C_convexity</b>      | 0.55    | 0.76 | 0.76 | 0.95    | 0.00    | 0.63    | 0.00    | 0.67    | 0.67    | 0.81 | 0.73    | 0.00    | 0.65    |
| <b>U_S_symmetry</b>       | 0.43    | 0.45 | 0.83 | 0.63    | 0.00    | 0.64    | 0.00    | 0.05    | 0.58    | 0.89 | 0.33    | 0.00    | 0.74    |
| <b>J_R_rise</b>           | 0.12    | 0.00 | 0.30 | 0.00    | 0.00    | 0.53    | 0.00    | 0.00    | 0.00    | 0.21 | 0.00    | 0.00    | 0.42    |
| <b>J_M_monotonicity</b>   | 0.32    | 0.40 | 0.53 | 0.33    | 0.35    | 0.52    | 0.11    | 0.32    | 0.37    | 0.32 | 0.15    | 0.11    | 0.32    |
| <b>J_C_rightconvex</b>    | 0.57    | 0.51 | 0.76 | 0.71    | 0.44    | 0.63    | 0.49    | 0.54    | 0.52    | 0.69 | 0.65    | 0.40    | 0.47    |
| <b>P_turning</b>          | 0.09    | 0.01 | 0.01 | 0.01    | 0.06    | 0.00    | 0.50    | 0.01    | 0.01    | 0.06 | 0.25    | 0.03    | 0.06    |
| <b>final_structure</b>    | neither | U    | U    | neither | neither | neither | neither | neither | neither | U    | neither | neither | neither |
| <b>U_supported</b>        | False   | 1.00 | 1.00 | 0.00    | 0.00    | 0.00    | 0.00    | 0.00    | 0.00    | 1.00 | 0.00    | 0.00    | 0.00    |
| <b>J_supported</b>        | False   | 0.00 | 0.00 | 0.00    | 0.00    | 0.00    | 0.00    | 0.00    | 0.00    | 0.00 | 0.00    | 0.00    | 0.00    |

Table S6ca. Luxembourg Cantril U-shape ratings, 2006-2024

| KPI                       | Mean    | 2005 | 2006 | 2007 | 2008 | 2009 | 2010    | 2011 | 2012    | 2013 | 2014 | 2015    | 2016  | 2017   | 2018    | 2019    | 2020 | 2021 | 2022 | 2023 | 2024 |
|---------------------------|---------|------|------|------|------|------|---------|------|---------|------|------|---------|-------|--------|---------|---------|------|------|------|------|------|
| <b>shape_class</b>        | neither |      |      |      |      |      | neither |      | neither |      |      | neither | J     | U      | neither | neither |      |      |      |      |      |
| <b>U_beauty</b>           | 0.00    |      |      |      |      |      | 0.00    |      | 0.00    |      |      | 0.00    | 0.00  | 0.01   | 0.00    | 0.00    |      |      |      |      |      |
| <b>J_beauty</b>           | 0.01    |      |      |      |      |      | 0.00    |      | 0.00    |      |      | 0.00    | 0.06  | 0.00   | 0.00    | 0.00    |      |      |      |      |      |
| <b>Dominance</b>          | -0.42   |      |      |      |      |      |         |      |         |      |      |         | -1.00 | 0.75   |         | -1.00   |      |      |      |      |      |
| <b>best_df</b>            | 4.43    |      |      |      |      |      | 4.00    |      | 4.00    |      |      | 5.00    | 3.00  | 5.00   | 5.00    | 5.00    |      |      |      |      |      |
| <b>p_value</b>            | 0.01    |      |      |      |      |      | 0.00    |      | 0.05    |      |      | 0.00    | 0.00  | 0.00   | 0.00    | 0.00    |      |      |      |      |      |
| <b>lr_stat</b>            | 51.48   |      |      |      |      |      | 40.58   |      | 15.80   |      |      | 60.63   | 34.75 | 88.93  | 59.83   | 59.87   |      |      |      |      |      |
| <b>linear_aic</b>         | 24.45   |      |      |      |      |      | 16.03   |      | 2.97    |      |      | 21.87   | 22.03 | 38.20  | 36.69   | 33.39   |      |      |      |      |      |
| <b>spline_aic</b>         | -10.17  |      |      |      |      |      | -8.55   |      | 3.18    |      |      | -20.77  | 1.28  | -32.73 | -5.15   | -8.48   |      |      |      |      |      |
| <b>min_age</b>            | 85.56   |      |      |      |      |      |         |      | 89.37   |      |      |         |       | 75.65  | 89.74   | 87.49   |      |      |      |      |      |
| <b>min_value</b>          | 5.74    |      |      |      |      |      |         |      | 6.82    |      |      |         |       | 6.62   | 4.49    | 5.02    |      |      |      |      |      |
| <b>amplitude</b>          | 2.39    |      |      |      |      |      | 1.67    |      | 0.86    |      |      | 2.19    | 2.58  | 3.38   | 3.06    | 2.97    |      |      |      |      |      |
| <b>delta_endpoints</b>    | -0.10   |      |      |      |      |      | -1.44   |      | -0.69   |      |      | -2.19   | 2.58  | 2.96   | -2.44   | 0.53    |      |      |      |      |      |
| <b>n_minima</b>           | 3.57    |      |      |      |      |      | 3.00    |      | 4.00    |      |      | 3.00    | 2.00  | 5.00   | 4.00    | 4.00    |      |      |      |      |      |
| <b>n_maxima</b>           | 3.29    |      |      |      |      |      | 4.00    |      | 3.00    |      |      | 4.00    | 2.00  | 4.00   | 3.00    | 3.00    |      |      |      |      |      |
| <b>turning_points</b>     | 6.86    |      |      |      |      |      | 7.00    |      | 7.00    |      |      | 7.00    | 4.00  | 9.00   | 7.00    | 7.00    |      |      |      |      |      |
| <b>r_trough</b>           | 0.81    |      |      |      |      |      | 1.00    |      | 0.96    |      |      | 1.00    | 0.00  | 0.78   | 0.97    | 0.94    |      |      |      |      |      |
| <b>interior_indicator</b> | False   |      |      |      |      |      | 0.00    |      | 0.00    |      |      | 0.00    | 0.00  | 1.00   | 0.00    | 0.00    |      |      |      |      |      |
| <b>trough_indicator</b>   | True    |      |      |      |      |      | 0.00    |      | 1.00    |      |      | 0.00    | 0.00  | 1.00   | 1.00    | 1.00    |      |      |      |      |      |
| <b>U_D_depth</b>          | 0.19    |      |      |      |      |      | 0.00    |      | 0.20    |      |      | 0.00    | 0.00  | 0.13   | 0.17    | 0.82    |      |      |      |      |      |
| <b>U_I_interiority</b>    | 0.04    |      |      |      |      |      | 0.00    |      | 0.00    |      |      | 0.00    | 0.00  | 0.30   | 0.00    | 0.00    |      |      |      |      |      |
| <b>U_M_monotonicity</b>   | 0.43    |      |      |      |      |      | 0.00    |      | 0.78    |      |      | 0.00    | 0.00  | 0.72   | 0.68    | 0.79    |      |      |      |      |      |
| <b>U_C_convexity</b>      | 0.44    |      |      |      |      |      | 0.00    |      | 0.72    |      |      | 0.30    | 0.00  | 0.68   | 0.73    | 0.67    |      |      |      |      |      |
| <b>U_S_symmetry</b>       | 0.25    |      |      |      |      |      | 0.00    |      | 0.33    |      |      | 0.00    | 0.00  | 0.22   | 0.30    | 0.90    |      |      |      |      |      |
| <b>J_R_rise</b>           | 0.29    |      |      |      |      |      | 0.00    |      | 0.00    |      |      | 0.00    | 1.00  | 0.87   | 0.00    | 0.18    |      |      |      |      |      |
| <b>J_M_monotonicity</b>   | 0.49    |      |      |      |      |      | 0.39    |      | 0.41    |      |      | 0.46    | 0.66  | 0.57   | 0.55    | 0.41    |      |      |      |      |      |

|                        |         |         |         |         |      |      |         |         |
|------------------------|---------|---------|---------|---------|------|------|---------|---------|
| <b>J_C_rightconvex</b> | 0.50    | 0.52    | 0.47    | 0.17    | 0.63 | 0.78 | 0.45    | 0.51    |
| <b>P_turning</b>       | 0.03    | 0.01    | 0.01    | 0.01    | 0.12 | 0.00 | 0.01    | 0.01    |
| <b>final_structure</b> | neither | neither | neither | neither | J    | U    | neither | neither |
| <b>U_supported</b>     | False   | 0.00    | 0.00    | 0.00    | 0.00 | 1.00 | 0.00    | 0.00    |
| <b>J_supported</b>     | False   | 0.00    | 0.00    | 0.00    | 1.00 | 0.00 | 0.00    | 0.00    |

Table S6cb. Madagascar Cantril U-shape ratings, 2006-2024

| KPI                       | Mean  | 2005 | 2006  | 2007 | 2008 | 2009 | 2010 | 2011 | 2012 | 2013  | 2014    | 2015 | 2016 | 2017    | 2018    | 2019 | 2020 | 2021 | 2022 | 2023 | 2024 |       |
|---------------------------|-------|------|-------|------|------|------|------|------|------|-------|---------|------|------|---------|---------|------|------|------|------|------|------|-------|
| <b>shape_class</b>        | U     |      | U     |      |      |      |      |      |      | U     | neither |      |      | neither | neither |      |      |      |      |      | U    |       |
| <b>U_beauty</b>           | 0.01  |      | 0.02  |      |      |      |      |      |      | 0.05  | 0.00    |      |      | 0.00    | 0.00    |      |      |      |      |      |      | 0.01  |
| <b>J_beauty</b>           | 0.00  |      | 0.00  |      |      |      |      |      |      | 0.00  | 0.00    |      |      | 0.00    | 0.00    |      |      |      |      |      |      | 0.02  |
| <b>Dominance</b>          | 0.11  |      | 0.91  |      |      |      |      |      |      | 1.00  |         |      |      | -1.00   |         |      |      |      |      |      |      | -0.48 |
| <b>best_df</b>            | 3.67  |      | 5.00  |      |      |      |      |      |      | 3.00  | 3.00    |      |      | 5.00    | 3.00    |      |      |      |      |      |      | 3.00  |
| <b>p_value</b>            | 0.01  |      | 0.00  |      |      |      |      |      |      | 0.00  | 0.00    |      |      | 0.00    | 0.04    |      |      |      |      |      |      | 0.00  |
| <b>lr_stat</b>            | 34.79 |      | 48.61 |      |      |      |      |      |      | 22.15 | 29.43   |      |      | 42.01   | 15.05   |      |      |      |      |      |      | 51.49 |
| <b>linear_aic</b>         | 34.34 |      | 27.76 |      |      |      |      |      |      | 14.04 | 23.24   |      |      | 51.16   | 30.02   |      |      |      |      |      |      | 59.78 |
| <b>spline_aic</b>         | 14.88 |      | -2.85 |      |      |      |      |      |      | 5.89  | 7.81    |      |      | 27.15   | 28.97   |      |      |      |      |      |      | 22.29 |
| <b>min_age</b>            | 71.28 |      | 63.24 |      |      |      |      |      |      | 51.21 |         |      |      | 88.05   |         |      |      |      |      |      |      | 82.60 |
| <b>min_value</b>          | 2.92  |      | 3.69  |      |      |      |      |      |      | 3.79  |         |      |      | 0.90    |         |      |      |      |      |      |      | 3.30  |
| <b>amplitude</b>          | 3.30  |      | 2.57  |      |      |      |      |      |      | 1.27  | 1.86    |      |      | 5.59    | 1.82    |      |      |      |      |      |      | 6.72  |
| <b>delta_endpoints</b>    | 0.91  |      | 0.99  |      |      |      |      |      |      | -0.18 | -1.17   |      |      | 2.19    | -1.50   |      |      |      |      |      |      | 5.11  |
| <b>n_minima</b>           | 3.17  |      | 4.00  |      |      |      |      |      |      | 3.00  | 3.00    |      |      | 5.00    | 1.00    |      |      |      |      |      |      | 3.00  |
| <b>n_maxima</b>           | 3.17  |      | 4.00  |      |      |      |      |      |      | 4.00  | 3.00    |      |      | 4.00    | 2.00    |      |      |      |      |      |      | 2.00  |
| <b>turning_points</b>     | 6.33  |      | 8.00  |      |      |      |      |      |      | 7.00  | 6.00    |      |      | 9.00    | 3.00    |      |      |      |      |      |      | 5.00  |
| <b>r_trough</b>           | 0.82  |      | 0.62  |      |      |      |      |      |      | 0.46  | 1.00    |      |      | 0.95    | 1.00    |      |      |      |      |      |      | 0.87  |
| <b>interior_indicator</b> | True  |      | 1.00  |      |      |      |      |      |      | 1.00  | 0.00    |      |      | 0.00    | 0.00    |      |      |      |      |      |      | 1.00  |
| <b>trough_indicator</b>   | True  |      | 1.00  |      |      |      |      |      |      | 1.00  | 0.00    |      |      | 1.00    | 0.00    |      |      |      |      |      |      | 1.00  |
| <b>U_D_depth</b>          | 0.19  |      | 0.13  |      |      |      |      |      |      | 0.16  | 0.00    |      |      | 0.61    | 0.00    |      |      |      |      |      |      | 0.24  |
| <b>U_I_interiority</b>    | 0.28  |      | 0.71  |      |      |      |      |      |      | 0.89  | 0.00    |      |      | 0.00    | 0.00    |      |      |      |      |      |      | 0.06  |
| <b>U_M_monotonicity</b>   | 0.46  |      | 0.60  |      |      |      |      |      |      | 0.64  | 0.00    |      |      | 0.75    | 0.00    |      |      |      |      |      |      | 0.74  |
| <b>U_C_convexity</b>      | 0.65  |      | 0.62  |      |      |      |      |      |      | 0.81  | 0.00    |      |      | 0.66    | 0.98    |      |      |      |      |      |      | 0.85  |
| <b>U_S_symmetry</b>       | 0.37  |      | 0.39  |      |      |      |      |      |      | 0.69  | 0.00    |      |      | 0.76    | 0.00    |      |      |      |      |      |      | 0.39  |
| <b>J_R_rise</b>           | 0.26  |      | 0.39  |      |      |      |      |      |      | 0.00  | 0.00    |      |      | 0.39    | 0.00    |      |      |      |      |      |      | 0.76  |
| <b>J_M_monotonicity</b>   | 0.52  |      | 0.54  |      |      |      |      |      |      | 0.50  | 0.55    |      |      | 0.47    | 0.56    |      |      |      |      |      |      | 0.52  |
| <b>J_C_rightconvex</b>    | 0.52  |      | 0.50  |      |      |      |      |      |      | 0.49  | 0.42    |      |      | 0.53    | 0.39    |      |      |      |      |      |      | 0.78  |
| <b>P_turning</b>          | 0.06  |      | 0.01  |      |      |      |      |      |      | 0.01  | 0.03    |      |      | 0.00    | 0.25    |      |      |      |      |      |      | 0.06  |
| <b>final_structure</b>    | U     |      | U     |      |      |      |      |      |      | U     | neither |      |      | neither | neither |      |      |      |      |      |      | U     |
| <b>U_supported</b>        | True  |      | 1.00  |      |      |      |      |      |      | 1.00  | 0.00    |      |      | 0.00    | 0.00    |      |      |      |      |      |      | 1.00  |
| <b>J_supported</b>        | False |      | 0.00  |      |      |      |      |      |      | 0.00  | 0.00    |      |      | 0.00    | 0.00    |      |      |      |      |      |      | 0.00  |

Table S6cc. Malawi Cantril U-shape ratings, 2006-2024

| KPI                | Mean    | 2005 | 2006 | 2007 | 2008 | 2009 | 2010 | 2011    | 2012 | 2013    | 2014  | 2015    | 2016    | 2017  | 2018 | 2019 | 2020    | 2021 | 2022    | 2023 | 2024  |
|--------------------|---------|------|------|------|------|------|------|---------|------|---------|-------|---------|---------|-------|------|------|---------|------|---------|------|-------|
| shape_class        | neither |      |      |      |      |      |      | neither |      | neither | U     | neither | neither | U     |      |      | neither |      | neither |      | U     |
| U_beauty           | 0.02    |      |      |      |      |      |      | 0.00    |      | 0.00    | 0.03  | 0.00    | 0.00    | 0.08  |      |      | 0.00    |      | 0.00    |      | 0.08  |
| J_beauty           | 0.00    |      |      |      |      |      |      | 0.00    |      | 0.00    | 0.00  | 0.00    | 0.00    | 0.00  |      |      | 0.00    |      | 0.00    |      | 0.00  |
| Dominance          | 0.99    |      |      |      |      |      |      |         |      | 1.00    |       |         |         | 0.97  |      |      |         |      |         |      | 1.00  |
| best_df            | 4.56    |      |      |      |      |      |      | 3.00    |      | 5.00    | 5.00  | 4.00    | 5.00    | 5.00  |      |      | 5.00    |      | 5.00    |      | 4.00  |
| p_value            | 0.02    |      |      |      |      |      |      | 0.11    |      | 0.00    | 0.00  | 0.00    | 0.00    | 0.00  |      |      | 0.03    |      | 0.00    |      | 0.00  |
| lr_stat            | 34.85   |      |      |      |      |      |      | 11.64   |      | 30.61   | 34.03 | 26.36   | 29.29   | 61.45 |      |      | 18.47   |      | 48.75   |      | 53.08 |
| linear_aic         | 37.56   |      |      |      |      |      |      | 29.23   |      | 23.42   | 24.60 | 29.19   | 34.57   | 46.27 |      |      | 58.55   |      | 50.60   |      | 41.62 |
| spline_aic         | 19.82   |      |      |      |      |      |      | 31.60   |      | 10.81   | 8.57  | 18.82   | 23.27   | 2.81  |      |      | 58.07   |      | 19.85   |      | 4.53  |
| min_age            | 81.47   |      |      |      |      |      |      | 87.68   |      |         | 79.59 | 87.30   | 88.43   | 68.88 |      |      |         |      | 89.74   |      | 68.69 |
| min_value          | 1.86    |      |      |      |      |      |      | 1.13    |      |         | 2.97  | 1.68    | -0.10   | 2.66  |      |      |         |      | 2.60    |      | 2.10  |
| amplitude          | 3.79    |      |      |      |      |      |      | 3.38    |      | 3.76    | 2.30  | 2.72    | 4.07    | 3.67  |      |      | 5.86    |      | 4.82    |      | 3.55  |
| delta_endpoints    | -1.41   |      |      |      |      |      |      | -2.54   |      | -3.33   | -0.93 | -0.91   | -1.71   | 2.17  |      |      | -4.55   |      | -0.41   |      | -0.47 |
| n_minima           | 3.67    |      |      |      |      |      |      | 3.00    |      | 3.00    | 4.00  | 4.00    | 3.00    | 4.00  |      |      | 4.00    |      | 4.00    |      | 4.00  |
| n_maxima           | 3.33    |      |      |      |      |      |      | 2.00    |      | 4.00    | 4.00  | 3.00    | 3.00    | 4.00  |      |      | 4.00    |      | 3.00    |      | 3.00  |
| turning_points     | 7.00    |      |      |      |      |      |      | 5.00    |      | 7.00    | 8.00  | 7.00    | 6.00    | 8.00  |      |      | 8.00    |      | 7.00    |      | 7.00  |
| r_trough           | 0.89    |      |      |      |      |      |      | 0.94    |      | 1.00    | 0.83  | 0.94    | 0.95    | 0.69  |      |      | 1.00    |      | 0.97    |      | 0.69  |
| interior_indicator | False   |      |      |      |      |      |      | 0.00    |      | 0.00    | 1.00  | 0.00    | 0.00    | 1.00  |      |      | 0.00    |      | 0.00    |      | 1.00  |
| trough_indicator   | True    |      |      |      |      |      |      | 1.00    |      | 0.00    | 1.00  | 1.00    | 1.00    | 1.00  |      |      | 0.00    |      | 1.00    |      | 1.00  |
| U_D_depth          | 0.33    |      |      |      |      |      |      | 0.25    |      | 0.00    | 0.45  | 0.67    | 0.51    | 0.41  |      |      | 0.00    |      | 0.29    |      | 0.40  |
| U_I_interiority    | 0.13    |      |      |      |      |      |      | 0.00    |      | 0.00    | 0.16  | 0.00    | 0.00    | 0.52  |      |      | 0.00    |      | 0.00    |      | 0.53  |
| U_M_monotonicity   | 0.58    |      |      |      |      |      |      | 0.85    |      | 0.00    | 0.73  | 0.80    | 0.80    | 0.65  |      |      | 0.00    |      | 0.75    |      | 0.62  |
| U_C_convexity      | 0.64    |      |      |      |      |      |      | 0.89    |      | 0.60    | 0.65  | 0.71    | 0.69    | 0.77  |      |      | 0.03    |      | 0.67    |      | 0.78  |
| U_S_symmetry       | 0.55    |      |      |      |      |      |      | 0.40    |      | 0.00    | 0.69  | 0.80    | 0.71    | 0.58  |      |      | 0.00    |      | 0.87    |      | 0.86  |
| J_R_rise           | 0.07    |      |      |      |      |      |      | 0.00    |      | 0.00    | 0.00  | 0.00    | 0.00    | 0.59  |      |      | 0.00    |      | 0.00    |      | 0.00  |
| J_M_monotonicity   | 0.40    |      |      |      |      |      |      | 0.32    |      | 0.30    | 0.37  | 0.40    | 0.39    | 0.48  |      |      | 0.48    |      | 0.46    |      | 0.44  |
| J_C_rightconvex    | 0.50    |      |      |      |      |      |      | 0.56    |      | 0.47    | 0.51  | 0.56    | 0.46    | 0.53  |      |      | 0.44    |      | 0.50    |      | 0.43  |
| P_turning          | 0.02    |      |      |      |      |      |      | 0.06    |      | 0.01    | 0.01  | 0.01    | 0.03    | 0.01  |      |      | 0.01    |      | 0.01    |      | 0.01  |
| final_structure    | neither |      |      |      |      |      |      | neither |      | neither | U     | neither | neither | U     |      |      | neither |      | neither |      | U     |
| U_supported        | False   |      |      |      |      |      |      | 0.00    |      | 0.00    | 1.00  | 0.00    | 0.00    | 1.00  |      |      | 0.00    |      | 0.00    |      | 1.00  |
| J_supported        | False   |      |      |      |      |      |      | 0.00    |      | 0.00    | 0.00  | 0.00    | 0.00    | 0.00  |      |      | 0.00    |      | 0.00    |      | 0.00  |

Table S6cd. Malaysia Cantril U-shape ratings, 2006-2024

| KPI         | Mean | 2005 | 2006 | 2007 | 2008 | 2009 | 2010 | 2011 | 2012 | 2013 | 2014 | 2015 | 2016 | 2017 | 2018 | 2019    | 2020 | 2021 | 2022 | 2023    | 2024 |
|-------------|------|------|------|------|------|------|------|------|------|------|------|------|------|------|------|---------|------|------|------|---------|------|
| shape_class | U    |      |      |      |      |      |      | U    |      |      |      |      |      |      | U    | neither |      |      |      | neither |      |
| U_beauty    | 0.02 |      |      |      |      |      |      | 0.01 |      |      |      |      |      |      | 0.09 | 0.00    |      |      |      | 0.00    |      |
| J_beauty    | 0.00 |      |      |      |      |      |      | 0.00 |      |      |      |      |      |      | 0.00 | 0.00    |      |      |      | 0.00    |      |
| Dominance   | 0.33 |      |      |      |      |      |      | 1.00 |      |      |      |      |      |      | 1.00 |         |      |      |      | -1.00   |      |
| best_df     | 4.50 |      |      |      |      |      |      | 5.00 |      |      |      |      |      |      | 4.00 | 4.00    |      |      |      | 5.00    |      |
| p_value     | 0.01 |      |      |      |      |      |      | 0.00 |      |      |      |      |      |      | 0.02 | 0.00    |      |      |      | 0.00    |      |

|                    |       |       |       |         |         |
|--------------------|-------|-------|-------|---------|---------|
| lr_stat            | 45.30 | 24.43 | 17.82 | 60.60   | 78.36   |
| linear_aic         | 33.36 | 33.18 | 6.38  | 35.60   | 58.29   |
| spline_aic         | 5.06  | 26.75 | 4.56  | -9.00   | -2.07   |
| min_age            | 82.91 | 80.53 | 80.53 |         | 87.68   |
| min_value          | 3.21  | 4.11  | 4.68  |         | 0.84    |
| amplitude          | 3.63  | 3.16  | 0.84  | 3.37    | 7.16    |
| delta_endpoints    | -0.62 | -0.97 | -0.02 | -2.71   | 1.23    |
| n_minima           | 3.50  | 4.00  | 4.00  | 2.00    | 4.00    |
| n_maxima           | 3.00  | 4.00  | 3.00  | 2.00    | 3.00    |
| turning_points     | 6.50  | 8.00  | 7.00  | 4.00    | 7.00    |
| r_trough           | 0.91  | 0.85  | 0.85  | 1.00    | 0.94    |
| interior_indicator | True  | 1.00  | 1.00  | 0.00    | 0.00    |
| trough_indicator   | True  | 1.00  | 1.00  | 0.00    | 1.00    |
| U_D_depth          | 0.52  | 0.29  | 0.97  | 0.00    | 0.83    |
| U_I_interiority    | 0.07  | 0.13  | 0.13  | 0.00    | 0.00    |
| U_M_monotonicity   | 0.57  | 0.64  | 0.79  | 0.00    | 0.83    |
| U_C_convexity      | 0.72  | 0.59  | 0.91  | 0.70    | 0.67    |
| U_S_symmetry       | 0.64  | 0.65  | 0.99  | 0.00    | 0.91    |
| J_R_rise           | 0.04  | 0.00  | 0.00  | 0.00    | 0.17    |
| J_M_monotonicity   | 0.39  | 0.46  | 0.47  | 0.28    | 0.34    |
| J_C_rightconvex    | 0.50  | 0.47  | 0.73  | 0.30    | 0.49    |
| P_turning          | 0.04  | 0.01  | 0.01  | 0.12    | 0.01    |
| final_structure    | U     | U     | U     | neither | neither |
| U_supported        | True  | 1.00  | 1.00  | 0.00    | 0.00    |
| J_supported        | False | 0.00  | 0.00  | 0.00    | 0.00    |

Table S6ce. Maldives Cantril U-shape ratings, 2006-2024

| KPI             | Mean    | 2005 | 2006 | 2007 | 2008 | 2009 | 2010 | 2011 | 2012 | 2013 | 2014 | 2015 | 2016 | 2017 | 2018    | 2019 | 2020 | 2021 | 2022 | 2023 | 2024 |
|-----------------|---------|------|------|------|------|------|------|------|------|------|------|------|------|------|---------|------|------|------|------|------|------|
| shape_class     | neither |      |      |      |      |      |      |      |      |      |      |      |      |      | neither |      |      |      |      |      |      |
| U_beauty        | 0.00    |      |      |      |      |      |      |      |      |      |      |      |      |      | 0.00    |      |      |      |      |      |      |
| J_beauty        | 0.00    |      |      |      |      |      |      |      |      |      |      |      |      |      | 0.00    |      |      |      |      |      |      |
| Dominance       |         |      |      |      |      |      |      |      |      |      |      |      |      |      |         |      |      |      |      |      |      |
| best_df         | 5.00    |      |      |      |      |      |      |      |      |      |      |      |      |      | 5.00    |      |      |      |      |      |      |
| p_value         | 0.00    |      |      |      |      |      |      |      |      |      |      |      |      |      | 0.00    |      |      |      |      |      |      |
| lr_stat         | 24.53   |      |      |      |      |      |      |      |      |      |      |      |      |      | 24.53   |      |      |      |      |      |      |
| linear_aic      | 25.79   |      |      |      |      |      |      |      |      |      |      |      |      |      | 25.79   |      |      |      |      |      |      |
| spline_aic      | 19.26   |      |      |      |      |      |      |      |      |      |      |      |      |      | 19.26   |      |      |      |      |      |      |
| min_age         | 87.86   |      |      |      |      |      |      |      |      |      |      |      |      |      | 87.86   |      |      |      |      |      |      |
| min_value       | 3.04    |      |      |      |      |      |      |      |      |      |      |      |      |      | 3.04    |      |      |      |      |      |      |
| amplitude       | 2.45    |      |      |      |      |      |      |      |      |      |      |      |      |      | 2.45    |      |      |      |      |      |      |
| delta_endpoints | -0.44   |      |      |      |      |      |      |      |      |      |      |      |      |      | -0.44   |      |      |      |      |      |      |
| n_minima        | 5.00    |      |      |      |      |      |      |      |      |      |      |      |      |      | 5.00    |      |      |      |      |      |      |
| n_maxima        | 4.00    |      |      |      |      |      |      |      |      |      |      |      |      |      | 4.00    |      |      |      |      |      |      |
| turning_points  | 9.00    |      |      |      |      |      |      |      |      |      |      |      |      |      | 9.00    |      |      |      |      |      |      |

|                           |         |         |
|---------------------------|---------|---------|
| <b>r_trough</b>           | 0.94    | 0.94    |
| <b>interior_indicator</b> | False   | 0.00    |
| <b>trough_indicator</b>   | True    | 1.00    |
| <b>U_D_depth</b>          | 0.79    | 0.79    |
| <b>U_I_interiority</b>    | 0.00    | 0.00    |
| <b>U_M_monotonicity</b>   | 0.78    | 0.78    |
| <b>U_C_convexity</b>      | 0.68    | 0.68    |
| <b>U_S_symmetry</b>       | 0.90    | 0.90    |
| <b>J_R_rise</b>           | 0.00    | 0.00    |
| <b>J_M_monotonicity</b>   | 0.43    | 0.43    |
| <b>J_C_rightconvex</b>    | 0.50    | 0.50    |
| <b>P_turning</b>          | 0.00    | 0.00    |
| <b>final_structure</b>    | neither | neither |
| <b>U_supported</b>        | False   | 0.00    |
| <b>J_supported</b>        | False   | 0.00    |

Table S6cf. Mali Cantril U-shape ratings, 2006-2024

| KPI                       | Mean    | 2005 | 2006    | 2007 | 2008  | 2009  | 2010  | 2011    | 2012    | 2013  | 2014  | 2015 | 2016  | 2017    | 2018  | 2019  | 2020 | 2021 | 2022 | 2023 | 2024    |
|---------------------------|---------|------|---------|------|-------|-------|-------|---------|---------|-------|-------|------|-------|---------|-------|-------|------|------|------|------|---------|
| <b>shape_class</b>        | neither |      | neither |      | U     | U     |       | neither | neither |       |       |      | U     | neither | U     | U     |      |      |      |      | neither |
| <b>U_beauty</b>           | 0.02    |      | 0.00    |      | 0.04  | 0.10  | 0.00  | 0.00    |         | 0.00  | 0.00  |      | 0.08  | 0.00    | 0.01  | 0.02  |      |      |      |      | 0.00    |
| <b>J_beauty</b>           | 0.01    |      | 0.00    |      | 0.00  | 0.02  | 0.00  | 0.00    |         | 0.00  | 0.00  |      | 0.02  | 0.00    | 0.00  | 0.03  |      |      |      |      | 0.00    |
| <b>Dominance</b>          | -0.11   |      | -1.00   |      | 1.00  | 0.61  | -1.00 | -1.00   |         |       |       |      | 0.60  |         | 0.98  | -0.19 |      |      |      |      | -1.00   |
| <b>best_df</b>            | 4.33    |      | 5.00    |      | 3.00  | 3.00  | 5.00  | 5.00    |         | 3.00  | 5.00  |      | 4.00  | 5.00    | 5.00  | 5.00  |      |      |      |      | 4.00    |
| <b>p_value</b>            | 0.03    |      | 0.01    |      | 0.34  | 0.02  | 0.01  | 0.01    |         | 0.00  | 0.01  |      | 0.00  | 0.00    | 0.00  | 0.00  |      |      |      |      | 0.00    |
| <b>lr_stat</b>            | 31.87   |      | 22.18   |      | 7.92  | 16.75 | 22.75 | 20.92   |         | 27.14 | 20.94 |      | 59.46 | 28.95   | 37.87 | 70.57 |      |      |      |      | 47.03   |
| <b>linear_aic</b>         | 35.18   |      | 12.91   |      | 26.92 | 32.15 | 25.13 | 13.78   |         | 24.57 | 22.15 |      | 36.91 | 52.64   | 56.59 | 59.19 |      |      |      |      | 59.21   |
| <b>spline_aic</b>         | 19.97   |      | 8.74    |      | 33.00 | 29.40 | 20.39 | 10.86   |         | 11.43 | 19.22 |      | -6.55 | 41.69   | 36.72 | 6.62  |      |      |      |      | 28.18   |
| <b>min_age</b>            | 81.68   |      | 86.92   |      | 74.52 | 73.58 | 87.86 | 88.24   |         |       | 88.24 |      | 72.45 |         | 78.28 | 79.97 |      |      |      |      | 86.74   |
| <b>min_value</b>          | 2.85    |      | 3.07    |      | 3.58  | 3.06  | 2.21  | 3.66    |         |       | 1.88  |      | 2.87  |         | 3.86  | 3.24  |      |      |      |      | 1.03    |
| <b>amplitude</b>          | 3.39    |      | 1.42    |      | 1.43  | 1.87  | 2.12  | 1.33    |         | 1.85  | 2.48  |      | 3.12  | 4.94    | 6.36  | 6.82  |      |      |      |      | 6.96    |
| <b>delta_endpoints</b>    | 0.48    |      | 0.34    |      | -0.36 | 0.97  | 0.54  | 0.22    |         | -0.60 | -1.06 |      | 1.98  | -4.05   | 0.48  | 4.41  |      |      |      |      | 2.95    |
| <b>n_minima</b>           | 2.83    |      | 3.00    |      | 2.00  | 2.00  | 5.00  | 3.00    |         | 1.00  | 3.00  |      | 2.00  | 3.00    | 4.00  | 2.00  |      |      |      |      | 4.00    |
| <b>n_maxima</b>           | 2.83    |      | 3.00    |      | 3.00  | 2.00  | 4.00  | 3.00    |         | 2.00  | 2.00  |      | 2.00  | 3.00    | 5.00  | 2.00  |      |      |      |      | 3.00    |
| <b>turning_points</b>     | 5.67    |      | 6.00    |      | 5.00  | 4.00  | 9.00  | 6.00    |         | 3.00  | 5.00  |      | 4.00  | 6.00    | 9.00  | 4.00  |      |      |      |      | 7.00    |
| <b>r_trough</b>           | 0.89    |      | 0.93    |      | 0.77  | 0.75  | 0.94  | 0.95    |         | 1.00  | 0.95  |      | 0.74  | 1.00    | 0.82  | 0.84  |      |      |      |      | 0.93    |
| <b>interior_indicator</b> | False   |      | 0.00    |      | 1.00  | 1.00  | 0.00  | 0.00    |         | 0.00  | 0.00  |      | 1.00  | 0.00    | 1.00  | 1.00  |      |      |      |      | 0.00    |
| <b>trough_indicator</b>   | True    |      | 1.00    |      | 1.00  | 1.00  | 1.00  | 1.00    |         | 0.00  | 1.00  |      | 1.00  | 0.00    | 1.00  | 1.00  |      |      |      |      | 1.00    |
| <b>U_D_depth</b>          | 0.41    |      | 0.76    |      | 0.23  | 0.48  | 0.75  | 0.83    |         | 0.00  | 0.45  |      | 0.37  | 0.00    | 0.11  | 0.34  |      |      |      |      | 0.58    |
| <b>U_I_interiority</b>    | 0.12    |      | 0.00    |      | 0.33  | 0.36  | 0.00  | 0.00    |         | 0.00  | 0.00  |      | 0.40  | 0.00    | 0.21  | 0.15  |      |      |      |      | 0.00    |
| <b>U_M_monotonicity</b>   | 0.63    |      | 0.81    |      | 0.74  | 0.80  | 0.72  | 0.80    |         | 0.00  | 0.75  |      | 0.85  | 0.00    | 0.63  | 0.71  |      |      |      |      | 0.75    |
| <b>U_C_convexity</b>      | 0.62    |      | 0.67    |      | 0.86  | 0.91  | 0.65  | 0.63    |         | 0.00  | 0.68  |      | 0.97  | 0.00    | 0.62  | 0.73  |      |      |      |      | 0.74    |
| <b>U_S_symmetry</b>       | 0.59    |      | 0.87    |      | 0.65  | 0.65  | 0.86  | 0.91    |         | 0.00  | 0.68  |      | 0.54  | 0.00    | 0.74  | 0.52  |      |      |      |      | 0.73    |
| <b>J_R_rise</b>           | 0.25    |      | 0.24    |      | 0.00  | 0.52  | 0.25  | 0.17    |         | 0.00  | 0.00  |      | 0.63  | 0.00    | 0.08  | 0.65  |      |      |      |      | 0.42    |
| <b>J_M_monotonicity</b>   | 0.47    |      | 0.39    |      | 0.36  | 0.52  | 0.50  | 0.39    |         | 0.59  | 0.47  |      | 0.46  | 0.40    | 0.50  | 0.56  |      |      |      |      | 0.47    |

|                        |         |         |      |      |         |         |         |         |      |         |      |      |         |
|------------------------|---------|---------|------|------|---------|---------|---------|---------|------|---------|------|------|---------|
| <b>J_C_rightconvex</b> | 0.55    | 0.50    | 0.47 | 0.93 | 0.57    | 0.56    | 0.39    | 0.53    | 0.64 | 0.41    | 0.49 | 0.58 | 0.50    |
| <b>P_turning</b>       | 0.07    | 0.03    | 0.06 | 0.12 | 0.00    | 0.03    | 0.25    | 0.06    | 0.12 | 0.03    | 0.00 | 0.12 | 0.01    |
| <b>final_structure</b> | neither | neither | U    | U    | neither | neither | neither | neither | U    | neither | U    | U    | neither |
| <b>U_supported</b>     | False   | 0.00    | 1.00 | 1.00 | 0.00    | 0.00    | 0.00    | 0.00    | 1.00 | 0.00    | 1.00 | 1.00 | 0.00    |
| <b>J_supported</b>     | False   | 0.00    | 0.00 | 0.00 | 0.00    | 0.00    | 0.00    | 0.00    | 0.00 | 0.00    | 0.00 | 0.00 | 0.00    |

Table S6cg. Malta Cantril U-shape ratings, 2006-2024

| KPI                       | Mean    | 2005 | 2006 | 2007 | 2008 | 2009 | 2010    | 2011 | 2012    | 2013 | 2014    | 2015  | 2016 | 2017    | 2018    | 2019 | 2020 | 2021 | 2022  | 2023  | 2024 |
|---------------------------|---------|------|------|------|------|------|---------|------|---------|------|---------|-------|------|---------|---------|------|------|------|-------|-------|------|
| <b>shape_class</b>        | neither |      |      |      |      |      | neither |      | neither |      | neither | U     |      | neither | neither |      |      |      | U     | U     |      |
| <b>U_beauty</b>           | 0.04    |      |      |      |      |      | 0.00    |      | 0.00    |      | 0.00    | 0.03  |      | 0.00    | 0.00    |      |      |      | 0.17  | 0.15  |      |
| <b>J_beauty</b>           | 0.00    |      |      |      |      |      | 0.00    |      | 0.00    |      | 0.00    | 0.00  |      | 0.01    | 0.00    |      |      |      | 0.00  | 0.00  |      |
| <b>Dominance</b>          | 0.19    |      |      |      |      |      |         |      |         |      | -1.00   | 1.00  |      | -1.00   |         |      |      |      | 0.99  | 0.97  |      |
| <b>best_df</b>            | 4.38    |      |      |      |      |      | 5.00    |      | 3.00    |      | 5.00    | 4.00  |      | 3.00    | 5.00    |      |      |      | 5.00  | 5.00  |      |
| <b>p_value</b>            | 0.00    |      |      |      |      |      | 0.00    |      | 0.00    |      | 0.00    | 0.00  |      | 0.00    | 0.00    |      |      |      | 0.00  | 0.00  |      |
| <b>lr_stat</b>            | 46.55   |      |      |      |      |      | 32.76   |      | 54.00   |      | 70.87   | 51.78 |      | 51.80   | 40.60   |      |      |      | 28.32 | 42.23 |      |
| <b>linear_aic</b>         | 30.91   |      |      |      |      |      | 43.01   |      | 36.74   |      | 28.40   | 35.56 |      | 32.97   | 24.27   |      |      |      | 21.96 | 24.36 |      |
| <b>spline_aic</b>         | 1.11    |      |      |      |      |      | 28.25   |      | -3.26   |      | -24.47  | -0.22 |      | -4.83   | 1.66    |      |      |      | 11.64 | 0.13  |      |
| <b>min_age</b>            | 67.86   |      |      |      |      |      |         |      |         |      | 85.42   | 77.15 |      | 84.67   |         |      |      |      | 46.89 | 45.20 |      |
| <b>min_value</b>          | 6.02    |      |      |      |      |      |         |      |         |      | 6.04    | 5.92  |      | 6.20    |         |      |      |      | 5.82  | 6.11  |      |
| <b>amplitude</b>          | 2.61    |      |      |      |      |      | 4.13    |      | 2.75    |      | 1.96    | 3.15  |      | 2.81    | 2.54    |      |      |      | 1.69  | 1.89  |      |
| <b>delta_endpoints</b>    | -0.67   |      |      |      |      |      | -3.93   |      | -2.31   |      | 0.54    | -0.34 |      | 1.62    | -2.54   |      |      |      | 0.76  | 0.81  |      |
| <b>n_minima</b>           | 3.38    |      |      |      |      |      | 4.00    |      | 2.00    |      | 3.00    | 3.00  |      | 3.00    | 4.00    |      |      |      | 4.00  | 4.00  |      |
| <b>n_maxima</b>           | 3.00    |      |      |      |      |      | 4.00    |      | 2.00    |      | 2.00    | 3.00  |      | 2.00    | 4.00    |      |      |      | 4.00  | 3.00  |      |
| <b>turning_points</b>     | 6.38    |      |      |      |      |      | 8.00    |      | 4.00    |      | 5.00    | 6.00  |      | 5.00    | 8.00    |      |      |      | 8.00  | 7.00  |      |
| <b>r_trough</b>           | 0.80    |      |      |      |      |      | 1.00    |      | 1.00    |      | 0.91    | 0.80  |      | 0.90    | 1.00    |      |      |      | 0.40  | 0.38  |      |
| <b>interior_indicator</b> | False   |      |      |      |      |      | 0.00    |      | 0.00    |      | 0.00    | 1.00  |      | 0.00    | 0.00    |      |      |      | 1.00  | 1.00  |      |
| <b>trough_indicator</b>   | True    |      |      |      |      |      | 0.00    |      | 0.00    |      | 1.00    | 1.00  |      | 1.00    | 0.00    |      |      |      | 1.00  | 1.00  |      |
| <b>U_D_depth</b>          | 0.32    |      |      |      |      |      | 0.00    |      | 0.00    |      | 0.73    | 0.28  |      | 0.42    | 0.00    |      |      |      | 0.55  | 0.57  |      |
| <b>U_I_interiority</b>    | 0.21    |      |      |      |      |      | 0.00    |      | 0.00    |      | 0.00    | 0.24  |      | 0.00    | 0.00    |      |      |      | 0.75  | 0.69  |      |
| <b>U_M_monotonicity</b>   | 0.46    |      |      |      |      |      | 0.00    |      | 0.00    |      | 0.88    | 0.71  |      | 0.71    | 0.00    |      |      |      | 0.71  | 0.68  |      |
| <b>U_C_convexity</b>      | 0.43    |      |      |      |      |      | 0.00    |      | 0.00    |      | 0.63    | 0.71  |      | 0.76    | 0.00    |      |      |      | 0.70  | 0.62  |      |
| <b>U_S_symmetry</b>       | 0.46    |      |      |      |      |      | 0.00    |      | 0.00    |      | 0.84    | 0.84  |      | 0.60    | 0.00    |      |      |      | 0.71  | 0.73  |      |
| <b>J_R_rise</b>           | 0.22    |      |      |      |      |      | 0.00    |      | 0.00    |      | 0.27    | 0.00  |      | 0.58    | 0.00    |      |      |      | 0.45  | 0.43  |      |
| <b>J_M_monotonicity</b>   | 0.44    |      |      |      |      |      | 0.43    |      | 0.32    |      | 0.29    | 0.39  |      | 0.55    | 0.45    |      |      |      | 0.59  | 0.49  |      |
| <b>J_C_rightconvex</b>    | 0.55    |      |      |      |      |      | 0.47    |      | 0.47    |      | 0.59    | 0.55  |      | 0.60    | 0.47    |      |      |      | 0.54  | 0.72  |      |
| <b>P_turning</b>          | 0.04    |      |      |      |      |      | 0.01    |      | 0.12    |      | 0.06    | 0.03  |      | 0.06    | 0.01    |      |      |      | 0.01  | 0.01  |      |
| <b>final_structure</b>    | neither |      |      |      |      |      | neither |      | neither |      | neither | U     |      | neither | neither |      |      |      | U     | U     |      |
| <b>U_supported</b>        | False   |      |      |      |      |      | 0.00    |      | 0.00    |      | 0.00    | 1.00  |      | 0.00    | 0.00    |      |      |      | 1.00  | 1.00  |      |
| <b>J_supported</b>        | False   |      |      |      |      |      | 0.00    |      | 0.00    |      | 0.00    | 0.00  |      | 0.00    | 0.00    |      |      |      | 0.00  | 0.00  |      |

Table S6ch. Mauritania Cantril U-shape ratings, 2006-2024

| KPI                | Mean    | 2005 | 2006 | 2007 | 2008 | 2009 | 2010 | 2011    | 2012 | 2013 | 2014 | 2015 | 2016 | 2017 | 2018 | 2019 | 2020 | 2021 | 2022 | 2023 | 2024 |  |
|--------------------|---------|------|------|------|------|------|------|---------|------|------|------|------|------|------|------|------|------|------|------|------|------|--|
| shape_class        | neither |      |      |      |      |      |      | neither |      |      |      |      |      |      |      |      |      |      |      |      |      |  |
| U_beauty           | 0.00    |      |      |      |      |      |      | 0.00    |      |      |      |      |      |      |      |      |      |      |      |      |      |  |
| J_beauty           | 0.00    |      |      |      |      |      |      | 0.00    |      |      |      |      |      |      |      |      |      |      |      |      |      |  |
| Dominance          |         |      |      |      |      |      |      |         |      |      |      |      |      |      |      |      |      |      |      |      |      |  |
| best_df            | 4.00    |      |      |      |      |      |      | 4.00    |      |      |      |      |      |      |      |      |      |      |      |      |      |  |
| p_value            | 0.17    |      |      |      |      |      |      | 0.17    |      |      |      |      |      |      |      |      |      |      |      |      |      |  |
| lr_stat            | 11.58   |      |      |      |      |      |      | 11.58   |      |      |      |      |      |      |      |      |      |      |      |      |      |  |
| linear_aic         | 13.51   |      |      |      |      |      |      | 13.51   |      |      |      |      |      |      |      |      |      |      |      |      |      |  |
| spline_aic         | 17.94   |      |      |      |      |      |      | 17.94   |      |      |      |      |      |      |      |      |      |      |      |      |      |  |
| min_age            | 89.56   |      |      |      |      |      |      | 89.56   |      |      |      |      |      |      |      |      |      |      |      |      |      |  |
| min_value          | 3.76    |      |      |      |      |      |      | 3.76    |      |      |      |      |      |      |      |      |      |      |      |      |      |  |
| amplitude          | 1.27    |      |      |      |      |      |      | 1.27    |      |      |      |      |      |      |      |      |      |      |      |      |      |  |
| delta_endpoints    | -1.02   |      |      |      |      |      |      | -1.02   |      |      |      |      |      |      |      |      |      |      |      |      |      |  |
| n_minima           | 4.00    |      |      |      |      |      |      | 4.00    |      |      |      |      |      |      |      |      |      |      |      |      |      |  |
| n_maxima           | 3.00    |      |      |      |      |      |      | 3.00    |      |      |      |      |      |      |      |      |      |      |      |      |      |  |
| turning_points     | 7.00    |      |      |      |      |      |      | 7.00    |      |      |      |      |      |      |      |      |      |      |      |      |      |  |
| r_trough           | 0.97    |      |      |      |      |      |      | 0.97    |      |      |      |      |      |      |      |      |      |      |      |      |      |  |
| interior_indicator | False   |      |      |      |      |      |      | 0.00    |      |      |      |      |      |      |      |      |      |      |      |      |      |  |
| trough_indicator   | True    |      |      |      |      |      |      | 1.00    |      |      |      |      |      |      |      |      |      |      |      |      |      |  |
| U_D_depth          | 0.20    |      |      |      |      |      |      | 0.20    |      |      |      |      |      |      |      |      |      |      |      |      |      |  |
| U_I_interiority    | 0.00    |      |      |      |      |      |      | 0.00    |      |      |      |      |      |      |      |      |      |      |      |      |      |  |
| U_M_monotonicity   | 0.75    |      |      |      |      |      |      | 0.75    |      |      |      |      |      |      |      |      |      |      |      |      |      |  |
| U_C_convexity      | 0.75    |      |      |      |      |      |      | 0.75    |      |      |      |      |      |      |      |      |      |      |      |      |      |  |
| U_S_symmetry       | 0.33    |      |      |      |      |      |      | 0.33    |      |      |      |      |      |      |      |      |      |      |      |      |      |  |
| J_R_rise           | 0.00    |      |      |      |      |      |      | 0.00    |      |      |      |      |      |      |      |      |      |      |      |      |      |  |
| J_M_monotonicity   | 0.46    |      |      |      |      |      |      | 0.46    |      |      |      |      |      |      |      |      |      |      |      |      |      |  |
| J_C_rightconvex    | 0.45    |      |      |      |      |      |      | 0.45    |      |      |      |      |      |      |      |      |      |      |      |      |      |  |
| P_turning          | 0.01    |      |      |      |      |      |      | 0.01    |      |      |      |      |      |      |      |      |      |      |      |      |      |  |
| final_structure    | neither |      |      |      |      |      |      | neither |      |      |      |      |      |      |      |      |      |      |      |      |      |  |
| U_supported        | False   |      |      |      |      |      |      | 0.00    |      |      |      |      |      |      |      |      |      |      |      |      |      |  |
| J_supported        | False   |      |      |      |      |      |      | 0.00    |      |      |      |      |      |      |      |      |      |      |      |      |      |  |

Table S6ci. Mauritius Cantril U-shape ratings, 2006-2024

| KPI         | Mean | 2005 | 2006 | 2007 | 2008 | 2009 | 2010 | 2011    | 2012 | 2013 | 2014 | 2015 | 2016 | 2017 | 2018 | 2019 | 2020 | 2021 | 2022 | 2023    | 2024    |      |
|-------------|------|------|------|------|------|------|------|---------|------|------|------|------|------|------|------|------|------|------|------|---------|---------|------|
| shape_class | U    |      |      |      |      |      |      | neither |      |      | U    |      |      |      |      | U    |      | U    |      | neither | neither |      |
| U_beauty    | 0.03 |      |      |      |      |      |      | 0.00    |      |      | 0.00 |      |      |      |      |      | 0.05 |      | 0.10 |         | 0.00    | 0.00 |
| J_beauty    | 0.00 |      |      |      |      |      |      | 0.00    |      |      | 0.00 |      |      |      |      |      | 0.00 |      | 0.02 |         | 0.00    | 0.00 |
| Dominance   | 0.87 |      |      |      |      |      |      |         |      |      | 1.00 |      |      |      |      |      | 0.88 |      | 0.72 |         |         |      |
| best_df     | 4.50 |      |      |      |      |      |      | 3.00    |      |      | 5.00 |      |      |      |      |      | 5.00 |      | 4.00 |         | 5.00    | 5.00 |
| p_value     | 0.02 |      |      |      |      |      |      | 0.00    |      |      | 0.00 |      |      |      |      |      | 0.00 |      | 0.00 |         | 0.11    | 0.00 |

|                           |       |  |         |  |       |  |       |  |       |         |         |
|---------------------------|-------|--|---------|--|-------|--|-------|--|-------|---------|---------|
| <b>lr_stat</b>            | 44.56 |  | 48.16   |  | 26.61 |  | 58.97 |  | 40.52 | 14.45   | 78.67   |
| <b>linear_aic</b>         | 31.13 |  | 20.14   |  | 11.41 |  | 43.17 |  | 33.59 | 27.23   | 51.25   |
| <b>spline_aic</b>         | 3.57  |  | -14.02  |  | 2.80  |  | 2.19  |  | 9.07  | 30.78   | -9.41   |
| <b>min_age</b>            | 55.86 |  |         |  | 48.02 |  | 46.89 |  | 39.37 | 89.18   |         |
| <b>min_value</b>          | 5.30  |  |         |  | 5.30  |  | 5.73  |  | 5.12  | 5.07    |         |
| <b>amplitude</b>          | 2.98  |  | 1.61    |  | 1.02  |  | 4.68  |  | 3.39  | 1.92    | 5.26    |
| <b>delta_endpoints</b>    | -0.50 |  | -0.83   |  | -0.95 |  | 1.58  |  | 2.00  | -0.28   | -4.50   |
| <b>n_minima</b>           | 3.17  |  | 2.00    |  | 4.00  |  | 3.00  |  | 3.00  | 4.00    | 3.00    |
| <b>n_maxima</b>           | 3.17  |  | 3.00    |  | 4.00  |  | 3.00  |  | 2.00  | 3.00    | 4.00    |
| <b>turning_points</b>     | 6.33  |  | 5.00    |  | 8.00  |  | 6.00  |  | 5.00  | 7.00    | 7.00    |
| <b>r_trough</b>           | 0.68  |  | 1.00    |  | 0.41  |  | 0.40  |  | 0.30  | 0.96    | 1.00    |
| <b>interior_indicator</b> | False |  | 0.00    |  | 1.00  |  | 1.00  |  | 1.00  | 0.00    | 0.00    |
| <b>trough_indicator</b>   | True  |  | 0.00    |  | 1.00  |  | 1.00  |  | 1.00  | 1.00    | 0.00    |
| <b>U_D_depth</b>          | 0.18  |  | 0.00    |  | 0.03  |  | 0.15  |  | 0.41  | 0.48    | 0.00    |
| <b>U_I_interiority</b>    | 0.34  |  | 0.00    |  | 0.78  |  | 0.75  |  | 0.50  | 0.00    | 0.00    |
| <b>U_M_monotonicity</b>   | 0.49  |  | 0.00    |  | 0.64  |  | 0.76  |  | 0.81  | 0.73    | 0.00    |
| <b>U_C_convexity</b>      | 0.57  |  | 0.00    |  | 0.94  |  | 1.00  |  | 0.85  | 0.65    | 0.00    |
| <b>U_S_symmetry</b>       | 0.33  |  | 0.00    |  | 0.06  |  | 0.47  |  | 0.58  | 0.87    | 0.00    |
| <b>J_R_rise</b>           | 0.15  |  | 0.00    |  | 0.00  |  | 0.34  |  | 0.59  | 0.00    | 0.00    |
| <b>J_M_monotonicity</b>   | 0.50  |  | 0.42    |  | 0.46  |  | 0.55  |  | 0.66  | 0.49    | 0.45    |
| <b>J_C_rightconvex</b>    | 0.52  |  | 0.45    |  | 0.49  |  | 0.51  |  | 0.63  | 0.52    | 0.53    |
| <b>P_turning</b>          | 0.03  |  | 0.06    |  | 0.01  |  | 0.03  |  | 0.06  | 0.01    | 0.01    |
| <b>final_structure</b>    | U     |  | neither |  | U     |  | U     |  | U     | neither | neither |
| <b>U_supported</b>        | False |  | 0.00    |  | 1.00  |  | 1.00  |  | 1.00  | 0.00    | 0.00    |
| <b>J_supported</b>        | False |  | 0.00    |  | 0.00  |  | 0.00  |  | 0.00  | 0.00    | 0.00    |

Table S6cj. Mexico Cantril U-shape ratings, 2006-2024

| KPI                    | Mean    | 2005 | 2006 | 2007 | 2008  | 2009    | 2010 | 2011  | 2012 | 2013 | 2014    | 2015 | 2016  | 2017  | 2018    | 2019 | 2020 | 2021 | 2022    | 2023    | 2024    |
|------------------------|---------|------|------|------|-------|---------|------|-------|------|------|---------|------|-------|-------|---------|------|------|------|---------|---------|---------|
| <b>shape_class</b>     | neither |      |      |      | U     | neither |      | U     |      |      | neither |      | U     | U     | neither |      |      |      | neither | neither | neither |
| <b>U_beauty</b>        | 0.05    |      |      |      | 0.15  | 0.00    |      | 0.05  |      |      | 0.00    |      | 0.03  | 0.26  | 0.00    |      |      |      | 0.00    | 0.00    | 0.00    |
| <b>J_beauty</b>        | 0.00    |      |      |      | 0.00  | 0.00    |      | 0.03  |      |      | 0.00    |      | 0.00  | 0.00  | 0.00    |      |      |      | 0.00    | 0.00    | 0.00    |
| <b>Dominance</b>       | 0.39    |      |      |      | 1.00  |         |      | 0.20  |      |      |         |      | 0.78  | 0.98  |         |      |      |      |         |         | -1.00   |
| <b>best_df</b>         | 4.60    |      |      |      | 4.00  | 5.00    |      | 4.00  |      |      | 5.00    |      | 5.00  | 5.00  | 5.00    |      |      |      | 5.00    | 3.00    | 5.00    |
| <b>p_value</b>         | 0.00    |      |      |      | 0.00  | 0.00    |      | 0.00  |      |      | 0.00    |      | 0.00  | 0.00  | 0.00    |      |      |      | 0.00    | 0.02    | 0.00    |
| <b>lr_stat</b>         | 39.61   |      |      |      | 28.78 | 51.69   |      | 62.59 |      |      | 26.95   |      | 60.23 | 38.82 | 30.81   |      |      |      | 34.09   | 17.22   | 44.92   |
| <b>linear_aic</b>      | 41.07   |      |      |      | 22.41 | 47.60   |      | 37.92 |      |      | 45.17   |      | 55.97 | 39.54 | 55.33   |      |      |      | 36.10   | 25.97   | 44.73   |
| <b>spline_aic</b>      | 18.67   |      |      |      | 9.63  | 13.91   |      | -8.67 |      |      | 36.23   |      | 13.74 | 18.72 | 42.52   |      |      |      | 20.01   | 22.75   | 17.82   |
| <b>min_age</b>         | 80.25   |      |      |      | 71.89 | 90.68   |      | 70.76 |      |      | 89.37   |      | 80.91 | 63.99 |         |      |      |      |         | 87.68   | 86.74   |
| <b>min_value</b>       | 4.52    |      |      |      | 5.85  | 1.67    |      | 6.30  |      |      | 3.23    |      | 3.73  | 4.91  |         |      |      |      |         | 5.25    | 5.20    |
| <b>amplitude</b>       | 4.19    |      |      |      | 1.75  | 5.85    |      | 3.20  |      |      | 4.92    |      | 6.28  | 3.01  | 7.02    |      |      |      | 3.57    | 2.19    | 4.14    |
| <b>delta_endpoints</b> | -1.07   |      |      |      | -0.47 | -5.50   |      | 2.41  |      |      | -2.34   |      | 3.24  | 0.78  | -7.02   |      |      |      | -3.28   | -0.25   | 1.77    |
| <b>n_minima</b>        | 3.50    |      |      |      | 3.00  | 5.00    |      | 2.00  |      |      | 5.00    |      | 3.00  | 3.00  | 4.00    |      |      |      | 3.00    | 2.00    | 5.00    |
| <b>n_maxima</b>        | 3.40    |      |      |      | 4.00  | 4.00    |      | 2.00  |      |      | 4.00    |      | 3.00  | 3.00  | 4.00    |      |      |      | 4.00    | 2.00    | 4.00    |
| <b>turning_points</b>  | 6.90    |      |      |      | 7.00  | 9.00    |      | 4.00  |      |      | 9.00    |      | 6.00  | 6.00  | 8.00    |      |      |      | 7.00    | 4.00    | 9.00    |

|                           |         |      |         |      |         |      |      |         |         |         |         |
|---------------------------|---------|------|---------|------|---------|------|------|---------|---------|---------|---------|
| <b>r_trough</b>           | 0.87    | 0.73 | 0.98    | 0.72 | 0.96    | 0.85 | 0.63 | 1.00    | 1.00    | 0.94    | 0.93    |
| <b>interior_indicator</b> | False   | 1.00 | 0.00    | 1.00 | 0.00    | 1.00 | 1.00 | 0.00    | 0.00    | 0.00    | 0.00    |
| <b>trough_indicator</b>   | True    | 1.00 | 1.00    | 1.00 | 1.00    | 1.00 | 1.00 | 0.00    | 0.00    | 1.00    | 1.00    |
| <b>U_D_depth</b>          | 0.36    | 0.67 | 0.05    | 0.25 | 0.35    | 0.48 | 0.66 | 0.00    | 0.00    | 0.57    | 0.57    |
| <b>U_I_interiority</b>    | 0.17    | 0.42 | 0.00    | 0.46 | 0.00    | 0.12 | 0.68 | 0.00    | 0.00    | 0.00    | 0.00    |
| <b>U_M_monotonicity</b>   | 0.63    | 0.73 | 0.79    | 0.80 | 0.76    | 0.82 | 0.81 | 0.00    | 0.00    | 0.82    | 0.77    |
| <b>U_C_convexity</b>      | 0.61    | 0.94 | 0.70    | 0.89 | 0.67    | 0.71 | 0.76 | 0.00    | 0.00    | 0.79    | 0.65    |
| <b>U_S_symmetry</b>       | 0.51    | 0.83 | 0.10    | 0.40 | 0.60    | 0.65 | 0.84 | 0.00    | 0.00    | 0.91    | 0.73    |
| <b>J_R_rise</b>           | 0.20    | 0.00 | 0.00    | 0.75 | 0.00    | 0.52 | 0.26 | 0.00    | 0.00    | 0.00    | 0.43    |
| <b>J_M_monotonicity</b>   | 0.43    | 0.49 | 0.38    | 0.54 | 0.45    | 0.42 | 0.53 | 0.37    | 0.27    | 0.37    | 0.45    |
| <b>J_C_rightconvex</b>    | 0.51    | 0.42 | 0.49    | 0.72 | 0.51    | 0.56 | 0.44 | 0.44    | 0.48    | 0.50    | 0.55    |
| <b>P_turning</b>          | 0.04    | 0.01 | 0.00    | 0.12 | 0.00    | 0.03 | 0.03 | 0.01    | 0.01    | 0.12    | 0.00    |
| <b>final_structure</b>    | neither | U    | neither | U    | neither | U    | U    | neither | neither | neither | neither |
| <b>U_supported</b>        | False   | 1.00 | 0.00    | 1.00 | 0.00    | 1.00 | 1.00 | 0.00    | 0.00    | 0.00    | 0.00    |
| <b>J_supported</b>        | False   | 0.00 | 0.00    | 0.00 | 0.00    | 0.00 | 0.00 | 0.00    | 0.00    | 0.00    | 0.00    |

Table S6ck. Moldova Cantril U-shape ratings, 2006-2024

| KPI                       | Mean  | 2005 | 2006 | 2007 | 2008 | 2009    | 2010  | 2011 | 2012   | 2013 | 2014 | 2015 | 2016 | 2017 | 2018    | 2019 | 2020 | 2021  | 2022    | 2023    | 2024  |
|---------------------------|-------|------|------|------|------|---------|-------|------|--------|------|------|------|------|------|---------|------|------|-------|---------|---------|-------|
| <b>shape_class</b>        | U     |      |      |      |      | neither | U     |      | U      |      |      |      |      |      | neither |      |      | U     | neither | neither | U     |
| <b>U_beauty</b>           | 0.02  |      |      |      |      | 0.00    | 0.01  |      | 0.07   |      |      |      |      |      | 0.00    |      |      | 0.04  | 0.00    | 0.00    | 0.05  |
| <b>J_beauty</b>           | 0.00  |      |      |      |      | 0.01    | 0.00  |      | 0.00   |      |      |      |      |      | 0.00    |      |      | 0.01  | 0.00    | 0.00    | 0.00  |
| <b>Dominance</b>          | 0.26  |      |      |      |      | -1.00   | 1.00  |      | 1.00   |      |      |      |      |      |         |      |      | 0.58  |         | -1.00   | 0.99  |
| <b>best_df</b>            | 4.38  |      |      |      |      | 5.00    | 5.00  |      | 5.00   |      |      |      |      |      | 3.00    |      |      | 5.00  | 4.00    | 3.00    | 5.00  |
| <b>p_value</b>            | 0.00  |      |      |      |      | 0.00    | 0.00  |      | 0.00   |      |      |      |      |      | 0.01    |      |      | 0.00  | 0.00    | 0.00    | 0.00  |
| <b>lr_stat</b>            | 48.91 |      |      |      |      | 73.87   | 26.20 |      | 72.54  |      |      |      |      |      | 19.82   |      |      | 83.75 | 33.37   | 47.24   | 34.49 |
| <b>linear_aic</b>         | 38.14 |      |      |      |      | 59.15   | 18.69 |      | 40.93  |      |      |      |      |      | 18.83   |      |      | 59.03 | 24.97   | 43.09   | 40.46 |
| <b>spline_aic</b>         | 5.98  |      |      |      |      | 3.29    | 10.49 |      | -13.62 |      |      |      |      |      | 13.01   |      |      | -6.72 | 7.60    | 9.86    | 23.97 |
| <b>min_age</b>            | 82.82 |      |      |      |      | 86.55   | 83.35 |      | 72.64  |      |      |      |      |      | 89.37   |      |      | 81.10 |         | 84.67   | 82.04 |
| <b>min_value</b>          | 3.75  |      |      |      |      | 3.29    | 3.17  |      | 4.43   |      |      |      |      |      | 2.81    |      |      | 3.71  |         | 4.42    | 4.41  |
| <b>amplitude</b>          | 4.43  |      |      |      |      | 6.71    | 3.05  |      | 3.58   |      |      |      |      |      | 4.13    |      |      | 6.29  | 4.98    | 3.58    | 3.11  |
| <b>delta_endpoints</b>    | -0.37 |      |      |      |      | 3.96    | -2.21 |      | -0.75  |      |      |      |      |      | -3.99   |      |      | 3.09  | -4.56   | 1.23    | 0.29  |
| <b>n_minima</b>           | 2.63  |      |      |      |      | 2.00    | 3.00  |      | 3.00   |      |      |      |      |      | 2.00    |      |      | 2.00  | 3.00    | 3.00    | 4.00  |
| <b>n_maxima</b>           | 2.38  |      |      |      |      | 2.00    | 2.00  |      | 3.00   |      |      |      |      |      | 0.00    |      |      | 1.00  | 4.00    | 3.00    | 4.00  |
| <b>turning_points</b>     | 5.00  |      |      |      |      | 4.00    | 5.00  |      | 6.00   |      |      |      |      |      | 1.00    |      |      | 3.00  | 7.00    | 6.00    | 8.00  |
| <b>r_trough</b>           | 0.89  |      |      |      |      | 0.93    | 0.88  |      | 0.74   |      |      |      |      |      | 0.96    |      |      | 0.85  | 1.00    | 0.90    | 0.87  |
| <b>interior_indicator</b> | False |      |      |      |      | 0.00    | 1.00  |      | 1.00   |      |      |      |      |      | 0.00    |      |      | 1.00  | 0.00    | 0.00    | 1.00  |
| <b>trough_indicator</b>   | True  |      |      |      |      | 1.00    | 1.00  |      | 1.00   |      |      |      |      |      | 1.00    |      |      | 1.00  | 0.00    | 1.00    | 1.00  |
| <b>U_D_depth</b>          | 0.39  |      |      |      |      | 0.41    | 0.28  |      | 0.30   |      |      |      |      |      | 0.03    |      |      | 0.51  | 0.00    | 0.66    | 0.91  |
| <b>U_I_interiority</b>    | 0.08  |      |      |      |      | 0.00    | 0.04  |      | 0.40   |      |      |      |      |      | 0.00    |      |      | 0.11  | 0.00    | 0.00    | 0.08  |
| <b>U_M_monotonicity</b>   | 0.78  |      |      |      |      | 0.92    | 0.93  |      | 0.78   |      |      |      |      |      | 1.00    |      |      | 0.96  | 0.00    | 0.88    | 0.79  |
| <b>U_C_convexity</b>      | 0.72  |      |      |      |      | 0.64    | 0.82  |      | 0.91   |      |      |      |      |      | 1.00    |      |      | 0.84  | 0.00    | 0.73    | 0.82  |
| <b>U_S_symmetry</b>       | 0.53  |      |      |      |      | 0.58    | 0.43  |      | 0.74   |      |      |      |      |      | 0.07    |      |      | 0.67  | 0.00    | 0.79    | 0.95  |
| <b>J_R_rise</b>           | 0.19  |      |      |      |      | 0.59    | 0.00  |      | 0.00   |      |      |      |      |      | 0.00    |      |      | 0.49  | 0.00    | 0.34    | 0.09  |
| <b>J_M_monotonicity</b>   | 0.26  |      |      |      |      | 0.22    | 0.24  |      | 0.35   |      |      |      |      |      | 0.04    |      |      | 0.21  | 0.29    | 0.30    | 0.46  |

|                        |       |  |         |      |  |      |  |  |         |  |      |         |         |      |
|------------------------|-------|--|---------|------|--|------|--|--|---------|--|------|---------|---------|------|
| <b>J_C_rightconvex</b> | 0.62  |  | 0.56    | 0.65 |  | 0.53 |  |  | 0.58    |  | 0.85 | 0.45    | 0.58    | 0.79 |
| <b>P_turning</b>       | 0.19  |  | 0.12    | 0.06 |  | 0.03 |  |  | 1.00    |  | 0.25 | 0.01    | 0.03    | 0.01 |
| <b>final_structure</b> | U     |  | neither | U    |  | U    |  |  | neither |  | U    | neither | neither | U    |
| <b>U_supported</b>     | False |  | 0.00    | 1.00 |  | 1.00 |  |  | 0.00    |  | 1.00 | 0.00    | 0.00    | 1.00 |
| <b>J_supported</b>     | False |  | 0.00    | 0.00 |  | 0.00 |  |  | 0.00    |  | 0.00 | 0.00    | 0.00    | 0.00 |

Table S6cl. Mongolia Cantril U-shape ratings, 2006-2024

| KPI                       | Mean    | 2005 | 2006 | 2007    | 2008  | 2009 | 2010 | 2011    | 2012 | 2013    | 2014  | 2015    | 2016 | 2017 | 2018 | 2019    | 2020 | 2021 | 2022 | 2023 | 2024 |
|---------------------------|---------|------|------|---------|-------|------|------|---------|------|---------|-------|---------|------|------|------|---------|------|------|------|------|------|
| <b>shape_class</b>        | neither |      |      | neither | U     |      |      | neither |      | neither | U     | neither |      |      |      | neither |      |      |      |      |      |
| <b>U_beauty</b>           | 0.01    |      |      | 0.00    | 0.07  |      |      | 0.00    |      | 0.00    | 0.03  | 0.00    |      |      |      | 0.00    |      |      |      |      |      |
| <b>J_beauty</b>           | 0.00    |      |      | 0.00    | 0.00  |      |      | 0.00    |      | 0.00    | 0.00  | 0.00    |      |      |      | 0.00    |      |      |      |      |      |
| <b>Dominance</b>          | 0.26    |      |      |         | 1.00  |      |      |         |      |         | 0.77  | -1.00   |      |      |      |         |      |      |      |      |      |
| <b>best_df</b>            | 4.43    |      |      | 5.00    | 3.00  |      |      | 5.00    |      | 5.00    | 5.00  | 3.00    |      |      |      | 5.00    |      |      |      |      |      |
| <b>p_value</b>            | 0.09    |      |      | 0.00    | 0.66  |      |      | 0.00    |      | 0.00    | 0.00  | 0.00    |      |      |      | 0.00    |      |      |      |      |      |
| <b>lr_stat</b>            | 37.79   |      |      | 40.03   | 5.00  |      |      | 43.55   |      | 37.59   | 48.05 | 32.74   |      |      |      | 57.59   |      |      |      |      |      |
| <b>linear_aic</b>         | 28.88   |      |      | 35.19   | 21.64 |      |      | 20.16   |      | 18.50   | 30.95 | 25.56   |      |      |      | 50.13   |      |      |      |      |      |
| <b>spline_aic</b>         | 7.94    |      |      | 13.16   | 30.64 |      |      | -5.39   |      | -1.09   | 0.90  | 6.82    |      |      |      | 10.54   |      |      |      |      |      |
| <b>min_age</b>            | 77.15   |      |      |         | 53.47 |      |      |         |      | 87.11   | 82.98 | 85.05   |      |      |      |         |      |      |      |      |      |
| <b>min_value</b>          | 3.64    |      |      |         | 3.91  |      |      |         |      | 3.51    | 3.46  | 3.65    |      |      |      |         |      |      |      |      |      |
| <b>amplitude</b>          | 2.53    |      |      | 3.20    | 0.81  |      |      | 2.35    |      | 1.92    | 2.54  | 1.98    |      |      |      | 4.95    |      |      |      |      |      |
| <b>delta_endpoints</b>    | -0.81   |      |      | -2.88   | -0.42 |      |      | -2.35   |      | -0.11   | 0.37  | 0.21    |      |      |      | -0.46   |      |      |      |      |      |
| <b>n_minima</b>           | 2.71    |      |      | 3.00    | 2.00  |      |      | 4.00    |      | 3.00    | 2.00  | 3.00    |      |      |      | 2.00    |      |      |      |      |      |
| <b>n_maxima</b>           | 3.00    |      |      | 4.00    | 3.00  |      |      | 4.00    |      | 3.00    | 1.00  | 3.00    |      |      |      | 3.00    |      |      |      |      |      |
| <b>turning_points</b>     | 5.71    |      |      | 7.00    | 5.00  |      |      | 8.00    |      | 6.00    | 3.00  | 6.00    |      |      |      | 5.00    |      |      |      |      |      |
| <b>r_trough</b>           | 0.89    |      |      | 1.00    | 0.49  |      |      | 1.00    |      | 0.93    | 0.88  | 0.91    |      |      |      | 1.00    |      |      |      |      |      |
| <b>interior_indicator</b> | False   |      |      | 0.00    | 1.00  |      |      | 0.00    |      | 0.00    | 1.00  | 0.00    |      |      |      | 0.00    |      |      |      |      |      |
| <b>trough_indicator</b>   | True    |      |      | 0.00    | 1.00  |      |      | 0.00    |      | 1.00    | 1.00  | 1.00    |      |      |      | 0.00    |      |      |      |      |      |
| <b>U_D_depth</b>          | 0.39    |      |      | 0.00    | 0.23  |      |      | 0.00    |      | 0.77    | 0.85  | 0.85    |      |      |      | 0.00    |      |      |      |      |      |
| <b>U_I_interiority</b>    | 0.15    |      |      | 0.00    | 0.97  |      |      | 0.00    |      | 0.00    | 0.05  | 0.00    |      |      |      | 0.00    |      |      |      |      |      |
| <b>U_M_monotonicity</b>   | 0.44    |      |      | 0.00    | 0.58  |      |      | 0.00    |      | 0.82    | 0.92  | 0.78    |      |      |      | 0.00    |      |      |      |      |      |
| <b>U_C_convexity</b>      | 0.48    |      |      | 0.08    | 0.97  |      |      | 0.00    |      | 0.65    | 0.86  | 0.78    |      |      |      | 0.00    |      |      |      |      |      |
| <b>U_S_symmetry</b>       | 0.47    |      |      | 0.00    | 0.47  |      |      | 0.00    |      | 0.97    | 0.92  | 0.94    |      |      |      | 0.00    |      |      |      |      |      |
| <b>J_R_rise</b>           | 0.04    |      |      | 0.00    | 0.00  |      |      | 0.00    |      | 0.00    | 0.15  | 0.11    |      |      |      | 0.00    |      |      |      |      |      |
| <b>J_M_monotonicity</b>   | 0.40    |      |      | 0.38    | 0.34  |      |      | 0.42    |      | 0.37    | 0.26  | 0.45    |      |      |      | 0.59    |      |      |      |      |      |
| <b>J_C_rightconvex</b>    | 0.56    |      |      | 0.45    | 0.30  |      |      | 0.57    |      | 0.65    | 0.77  | 0.60    |      |      |      | 0.56    |      |      |      |      |      |
| <b>P_turning</b>          | 0.06    |      |      | 0.01    | 0.06  |      |      | 0.01    |      | 0.03    | 0.25  | 0.03    |      |      |      | 0.06    |      |      |      |      |      |
| <b>final_structure</b>    | neither |      |      | neither | U     |      |      | neither |      | neither | U     | neither |      |      |      | neither |      |      |      |      |      |
| <b>U_supported</b>        | False   |      |      | 0.00    | 1.00  |      |      | 0.00    |      | 0.00    | 1.00  | 0.00    |      |      |      | 0.00    |      |      |      |      |      |
| <b>J_supported</b>        | False   |      |      | 0.00    | 0.00  |      |      | 0.00    |      | 0.00    | 0.00  | 0.00    |      |      |      | 0.00    |      |      |      |      |      |

Table S6cm. Montenegro Cantril U-shape ratings, 2006-2024

| KPI                | Mean    | 2005 | 2006 | 2007 | 2008 | 2009 | 2010 | 2011 | 2012 | 2013 | 2014 | 2015    | 2016    | 2017  | 2018 | 2019 | 2020    | 2021 | 2022 | 2023    | 2024    |
|--------------------|---------|------|------|------|------|------|------|------|------|------|------|---------|---------|-------|------|------|---------|------|------|---------|---------|
| shape_class        | neither |      |      |      |      |      |      |      |      |      |      | neither | neither | U     |      |      | neither |      |      | neither | neither |
| U_beauty           | 0.02    |      |      |      |      |      |      |      |      |      |      | 0.00    | 0.00    | 0.10  |      |      | 0.00    |      |      | 0.00    | 0.00    |
| J_beauty           | 0.00    |      |      |      |      |      |      |      |      |      |      | 0.00    | 0.00    | 0.01  |      |      | 0.00    |      |      | 0.00    | 0.00    |
| Dominance          | 0.87    |      |      |      |      |      |      |      |      |      |      |         |         | 0.87  |      |      |         |      |      |         |         |
| best_df            | 4.33    |      |      |      |      |      |      |      |      |      |      | 3.00    | 5.00    | 5.00  |      |      | 5.00    |      |      | 4.00    | 4.00    |
| p_value            | 0.00    |      |      |      |      |      |      |      |      |      |      | 0.00    | 0.00    | 0.00  |      |      | 0.00    |      |      | 0.00    | 0.00    |
| lr_stat            | 47.64   |      |      |      |      |      |      |      |      |      |      | 39.34   | 25.13   | 53.59 |      |      | 51.56   |      |      | 60.56   | 55.68   |
| linear_aic         | 39.79   |      |      |      |      |      |      |      |      |      |      | 35.45   | 27.66   | 44.06 |      |      | 57.42   |      |      | 42.88   | 31.25   |
| spline_aic         | 8.81    |      |      |      |      |      |      |      |      |      |      | 10.10   | 20.53   | 8.47  |      |      | 23.86   |      |      | -1.67   | -8.43   |
| min_age            | 84.25   |      |      |      |      |      |      |      |      |      |      | 85.42   |         | 76.02 |      |      | 87.86   |      |      |         | 87.68   |
| min_value          | 2.71    |      |      |      |      |      |      |      |      |      |      | 3.42    |         | 4.24  |      |      | -0.06   |      |      |         | 3.25    |
| amplitude          | 4.41    |      |      |      |      |      |      |      |      |      |      | 3.58    | 2.46    | 3.76  |      |      | 6.89    |      |      | 6.05    | 3.72    |
| delta_endpoints    | -1.75   |      |      |      |      |      |      |      |      |      |      | -1.00   | -2.46   | 1.72  |      |      | -1.84   |      |      | -6.05   | -0.87   |
| n_minima           | 3.00    |      |      |      |      |      |      |      |      |      |      | 2.00    | 3.00    | 3.00  |      |      | 3.00    |      |      | 3.00    | 4.00    |
| n_maxima           | 2.50    |      |      |      |      |      |      |      |      |      |      | 1.00    | 3.00    | 2.00  |      |      | 2.00    |      |      | 3.00    | 4.00    |
| turning_points     | 5.50    |      |      |      |      |      |      |      |      |      |      | 3.00    | 6.00    | 5.00  |      |      | 5.00    |      |      | 6.00    | 8.00    |
| r_trough           | 0.93    |      |      |      |      |      |      |      |      |      |      | 0.91    | 1.00    | 0.79  |      |      | 0.94    |      |      | 1.00    | 0.94    |
| interior_indicator | False   |      |      |      |      |      |      |      |      |      |      | 0.00    | 0.00    | 1.00  |      |      | 0.00    |      |      | 0.00    | 0.00    |
| trough_indicator   | True    |      |      |      |      |      |      |      |      |      |      | 1.00    | 0.00    | 1.00  |      |      | 1.00    |      |      | 0.00    | 1.00    |
| U_D_depth          | 0.46    |      |      |      |      |      |      |      |      |      |      | 0.72    | 0.00    | 0.54  |      |      | 0.73    |      |      | 0.00    | 0.74    |
| U_I_interiority    | 0.05    |      |      |      |      |      |      |      |      |      |      | 0.00    | 0.00    | 0.28  |      |      | 0.00    |      |      | 0.00    | 0.00    |
| U_M_monotonicity   | 0.58    |      |      |      |      |      |      |      |      |      |      | 0.90    | 0.00    | 0.88  |      |      | 0.88    |      |      | 0.00    | 0.81    |
| U_C_convexity      | 0.52    |      |      |      |      |      |      |      |      |      |      | 0.79    | 0.00    | 0.92  |      |      | 0.71    |      |      | 0.00    | 0.71    |
| U_S_symmetry       | 0.54    |      |      |      |      |      |      |      |      |      |      | 0.84    | 0.00    | 0.70  |      |      | 0.85    |      |      | 0.00    | 0.86    |
| J_R_rise           | 0.08    |      |      |      |      |      |      |      |      |      |      | 0.00    | 0.00    | 0.46  |      |      | 0.00    |      |      | 0.00    | 0.00    |
| J_M_monotonicity   | 0.34    |      |      |      |      |      |      |      |      |      |      | 0.26    | 0.35    | 0.40  |      |      | 0.27    |      |      | 0.37    | 0.38    |
| J_C_rightconvex    | 0.55    |      |      |      |      |      |      |      |      |      |      | 0.59    | 0.41    | 0.94  |      |      | 0.44    |      |      | 0.46    | 0.48    |
| P_turning          | 0.07    |      |      |      |      |      |      |      |      |      |      | 0.25    | 0.03    | 0.06  |      |      | 0.06    |      |      | 0.03    | 0.01    |
| final_structure    | neither |      |      |      |      |      |      |      |      |      |      | neither | neither | U     |      |      | neither |      |      | neither | neither |
| U_supported        | False   |      |      |      |      |      |      |      |      |      |      | 0.00    | 0.00    | 1.00  |      |      | 0.00    |      |      | 0.00    | 0.00    |
| J_supported        | False   |      |      |      |      |      |      |      |      |      |      | 0.00    | 0.00    | 0.00  |      |      | 0.00    |      |      | 0.00    | 0.00    |

Table S6cn. Morocco Cantril U-shape ratings, 2006-2024

| KPI         | Mean | 2005 | 2006 | 2007 | 2008 | 2009 | 2010 | 2011 | 2012 | 2013 | 2014 | 2015 | 2016    | 2017 | 2018 | 2019    | 2020 | 2021 | 2022 | 2023 | 2024 |
|-------------|------|------|------|------|------|------|------|------|------|------|------|------|---------|------|------|---------|------|------|------|------|------|
| shape_class | U    |      |      |      |      |      |      |      | U    |      |      | U    | neither | U    |      | neither |      |      |      | U    |      |
| U_beauty    | 0.08 |      |      |      |      |      |      |      | 0.05 |      |      | 0.30 | 0.00    | 0.00 |      |         | 0.00 |      |      |      | 0.15 |
| J_beauty    | 0.00 |      |      |      |      |      |      |      | 0.00 |      |      | 0.00 | 0.00    | 0.00 |      |         | 0.00 |      |      |      | 0.00 |
| Dominance   | 1.00 |      |      |      |      |      |      |      | 1.00 |      |      | 1.00 |         | 1.00 |      |         |      |      |      |      | 0.99 |
| best_df     | 4.83 |      |      |      |      |      |      |      | 4.00 |      |      | 5.00 | 5.00    | 5.00 |      |         | 5.00 |      |      |      | 5.00 |
| p_value     | 0.00 |      |      |      |      |      |      |      | 0.00 |      |      | 0.00 | 0.00    | 0.00 |      |         | 0.00 |      |      |      | 0.00 |

|                    |       |        |       |         |       |         |       |
|--------------------|-------|--------|-------|---------|-------|---------|-------|
| lr_stat            | 40.72 | 39.77  | 27.26 | 30.49   | 43.85 | 31.77   | 71.19 |
| linear_aic         | 30.71 | 5.58   | 25.72 | 25.12   | 49.26 | 34.29   | 44.26 |
| spline_aic         | 7.65  | -18.18 | 16.46 | 12.63   | 23.41 | 20.52   | -8.92 |
| min_age            | 68.24 | 79.41  | 60.98 |         | 42.38 | 88.05   | 70.38 |
| min_value          | 4.15  | 4.24   | 4.70  |         | 4.96  | 3.21    | 3.66  |
| amplitude          | 2.75  | 1.28   | 1.60  | 3.15    | 4.62  | 2.87    | 3.01  |
| delta_endpoints    | -0.67 | -0.53  | -0.06 | -3.15   | -1.05 | -0.08   | 0.83  |
| n_minima           | 3.50  | 3.00   | 3.00  | 3.00    | 3.00  | 5.00    | 4.00  |
| n_maxima           | 3.17  | 3.00   | 3.00  | 3.00    | 3.00  | 4.00    | 3.00  |
| turning_points     | 6.67  | 6.00   | 6.00  | 6.00    | 6.00  | 9.00    | 7.00  |
| r_trough           | 0.74  | 0.83   | 0.59  | 1.00    | 0.34  | 0.95    | 0.71  |
| interior_indicator | True  | 1.00   | 1.00  | 0.00    | 1.00  | 0.00    | 1.00  |
| trough_indicator   | True  | 1.00   | 1.00  | 0.00    | 1.00  | 1.00    | 1.00  |
| U_D_depth          | 0.52  | 0.59   | 0.82  | 0.00    | 0.01  | 0.97    | 0.72  |
| U_I_interiority    | 0.34  | 0.17   | 0.78  | 0.00    | 0.60  | 0.00    | 0.47  |
| U_M_monotonicity   | 0.62  | 0.77   | 0.68  | 0.00    | 0.84  | 0.74    | 0.70  |
| U_C_convexity      | 0.68  | 0.71   | 0.71  | 0.40    | 0.96  | 0.66    | 0.66  |
| U_S_symmetry       | 0.61  | 0.74   | 0.98  | 0.00    | 0.10  | 0.99    | 0.84  |
| J_R_rise           | 0.05  | 0.00   | 0.00  | 0.00    | 0.00  | 0.00    | 0.28  |
| J_M_monotonicity   | 0.41  | 0.36   | 0.44  | 0.35    | 0.47  | 0.48    | 0.38  |
| J_C_rightconvex    | 0.50  | 0.56   | 0.47  | 0.37    | 0.49  | 0.54    | 0.55  |
| P_turning          | 0.02  | 0.03   | 0.03  | 0.03    | 0.03  | 0.00    | 0.01  |
| final_structure    | U     | U      | U     | neither | U     | neither | U     |
| U_supported        | True  | 1.00   | 1.00  | 0.00    | 1.00  | 0.00    | 1.00  |
| J_supported        | False | 0.00   | 0.00  | 0.00    | 0.00  | 0.00    | 0.00  |

Table S6co. Myanmar Cantril U-shape ratings, 2006-2024

| KPI             | Mean  | 2005 | 2006 | 2007 | 2008 | 2009 | 2010 | 2011 | 2012    | 2013 | 2014   | 2015 | 2016 | 2017 | 2018 | 2019 | 2020 | 2021 | 2022 | 2023 | 2024 |  |
|-----------------|-------|------|------|------|------|------|------|------|---------|------|--------|------|------|------|------|------|------|------|------|------|------|--|
| shape_class     | U     |      |      |      |      |      |      |      | neither |      | U      |      |      |      |      |      |      |      |      |      |      |  |
| U_beauty        | 0.02  |      |      |      |      |      |      |      | 0.00    |      | 0.03   |      |      |      |      |      |      |      |      |      |      |  |
| J_beauty        | 0.00  |      |      |      |      |      |      |      | 0.00    |      | 0.00   |      |      |      |      |      |      |      |      |      |      |  |
| Dominance       | -0.03 |      |      |      |      |      |      |      | -1.00   |      | 0.94   |      |      |      |      |      |      |      |      |      |      |  |
| best_df         | 4.50  |      |      |      |      |      |      |      | 5.00    |      | 4.00   |      |      |      |      |      |      |      |      |      |      |  |
| p_value         | 0.00  |      |      |      |      |      |      |      | 0.00    |      | 0.00   |      |      |      |      |      |      |      |      |      |      |  |
| lr_stat         | 46.83 |      |      |      |      |      |      |      | 43.79   |      | 49.87  |      |      |      |      |      |      |      |      |      |      |  |
| linear_aic      | 28.97 |      |      |      |      |      |      |      | 39.22   |      | 18.72  |      |      |      |      |      |      |      |      |      |      |  |
| spline_aic      | -0.86 |      |      |      |      |      |      |      | 13.43   |      | -15.15 |      |      |      |      |      |      |      |      |      |      |  |
| min_age         | 82.60 |      |      |      |      |      |      |      | 88.05   |      | 77.15  |      |      |      |      |      |      |      |      |      |      |  |
| min_value       | 2.89  |      |      |      |      |      |      |      | 1.45    |      | 4.32   |      |      |      |      |      |      |      |      |      |      |  |
| amplitude       | 2.74  |      |      |      |      |      |      |      | 3.54    |      | 1.94   |      |      |      |      |      |      |      |      |      |      |  |
| delta_endpoints | 0.37  |      |      |      |      |      |      |      | 0.35    |      | 0.39   |      |      |      |      |      |      |      |      |      |      |  |
| n_minima        | 3.50  |      |      |      |      |      |      |      | 4.00    |      | 3.00   |      |      |      |      |      |      |      |      |      |      |  |
| n_maxima        | 3.50  |      |      |      |      |      |      |      | 3.00    |      | 4.00   |      |      |      |      |      |      |      |      |      |      |  |
| turning_points  | 7.00  |      |      |      |      |      |      |      | 7.00    |      | 7.00   |      |      |      |      |      |      |      |      |      |      |  |

|                           |       |         |      |
|---------------------------|-------|---------|------|
| <b>r_trough</b>           | 0.87  | 0.95    | 0.80 |
| <b>interior_indicator</b> | False | 0.00    | 1.00 |
| <b>trough_indicator</b>   | True  | 1.00    | 1.00 |
| <b>U_D_depth</b>          | 0.61  | 0.90    | 0.32 |
| <b>U_I_interiority</b>    | 0.12  | 0.00    | 0.24 |
| <b>U_M_monotonicity</b>   | 0.71  | 0.78    | 0.65 |
| <b>U_C_convexity</b>      | 0.71  | 0.67    | 0.75 |
| <b>U_S_symmetry</b>       | 0.86  | 0.95    | 0.76 |
| <b>J_R_rise</b>           | 0.15  | 0.10    | 0.20 |
| <b>J_M_monotonicity</b>   | 0.47  | 0.43    | 0.51 |
| <b>J_C_rightconvex</b>    | 0.55  | 0.53    | 0.56 |
| <b>P_turning</b>          | 0.01  | 0.01    | 0.01 |
| <b>final_structure</b>    | U     | neither | U    |
| <b>U_supported</b>        | False | 0.00    | 1.00 |
| <b>J_supported</b>        | False | 0.00    | 0.00 |

Table S6cp. Nagorno Karabakh Cantril U-shape ratings, 2006-2024

| KPI                       | Mean    | 2005 | 2006 | 2007 | 2008 | 2009 | 2010 | 2011 | 2012 | 2013    | 2014 | 2015 | 2016 | 2017 | 2018 | 2019 | 2020 | 2021 | 2022 | 2023 | 2024 |
|---------------------------|---------|------|------|------|------|------|------|------|------|---------|------|------|------|------|------|------|------|------|------|------|------|
| <b>shape_class</b>        | neither |      |      |      |      |      |      |      |      | neither |      |      |      |      |      |      |      |      |      |      |      |
| <b>U_beauty</b>           | 0.00    |      |      |      |      |      |      |      |      | 0.00    |      |      |      |      |      |      |      |      |      |      |      |
| <b>J_beauty</b>           | 0.00    |      |      |      |      |      |      |      |      | 0.00    |      |      |      |      |      |      |      |      |      |      |      |
| <b>Dominance</b>          |         |      |      |      |      |      |      |      |      |         |      |      |      |      |      |      |      |      |      |      |      |
| <b>best_df</b>            | 5.00    |      |      |      |      |      |      |      |      | 5.00    |      |      |      |      |      |      |      |      |      |      |      |
| <b>p_value</b>            | 0.00    |      |      |      |      |      |      |      |      | 0.00    |      |      |      |      |      |      |      |      |      |      |      |
| <b>lr_stat</b>            | 31.11   |      |      |      |      |      |      |      |      | 31.11   |      |      |      |      |      |      |      |      |      |      |      |
| <b>linear_aic</b>         | 7.56    |      |      |      |      |      |      |      |      | 7.56    |      |      |      |      |      |      |      |      |      |      |      |
| <b>spline_aic</b>         | -5.54   |      |      |      |      |      |      |      |      | -5.54   |      |      |      |      |      |      |      |      |      |      |      |
| <b>min_age</b>            | 87.49   |      |      |      |      |      |      |      |      | 87.49   |      |      |      |      |      |      |      |      |      |      |      |
| <b>min_value</b>          | 4.29    |      |      |      |      |      |      |      |      | 4.29    |      |      |      |      |      |      |      |      |      |      |      |
| <b>amplitude</b>          | 1.14    |      |      |      |      |      |      |      |      | 1.14    |      |      |      |      |      |      |      |      |      |      |      |
| <b>delta_endpoints</b>    | -0.10   |      |      |      |      |      |      |      |      | -0.10   |      |      |      |      |      |      |      |      |      |      |      |
| <b>n_minima</b>           | 4.00    |      |      |      |      |      |      |      |      | 4.00    |      |      |      |      |      |      |      |      |      |      |      |
| <b>n_maxima</b>           | 3.00    |      |      |      |      |      |      |      |      | 3.00    |      |      |      |      |      |      |      |      |      |      |      |
| <b>turning_points</b>     | 7.00    |      |      |      |      |      |      |      |      | 7.00    |      |      |      |      |      |      |      |      |      |      |      |
| <b>r_trough</b>           | 0.94    |      |      |      |      |      |      |      |      | 0.94    |      |      |      |      |      |      |      |      |      |      |      |
| <b>interior_indicator</b> | False   |      |      |      |      |      |      |      |      | 0.00    |      |      |      |      |      |      |      |      |      |      |      |
| <b>trough_indicator</b>   | True    |      |      |      |      |      |      |      |      | 1.00    |      |      |      |      |      |      |      |      |      |      |      |
| <b>U_D_depth</b>          | 0.91    |      |      |      |      |      |      |      |      | 0.91    |      |      |      |      |      |      |      |      |      |      |      |
| <b>U_I_interiority</b>    | 0.00    |      |      |      |      |      |      |      |      | 0.00    |      |      |      |      |      |      |      |      |      |      |      |
| <b>U_M_monotonicity</b>   | 0.87    |      |      |      |      |      |      |      |      | 0.87    |      |      |      |      |      |      |      |      |      |      |      |
| <b>U_C_convexity</b>      | 0.64    |      |      |      |      |      |      |      |      | 0.64    |      |      |      |      |      |      |      |      |      |      |      |
| <b>U_S_symmetry</b>       | 0.95    |      |      |      |      |      |      |      |      | 0.95    |      |      |      |      |      |      |      |      |      |      |      |
| <b>J_R_rise</b>           | 0.00    |      |      |      |      |      |      |      |      | 0.00    |      |      |      |      |      |      |      |      |      |      |      |
| <b>J_M_monotonicity</b>   | 0.30    |      |      |      |      |      |      |      |      | 0.30    |      |      |      |      |      |      |      |      |      |      |      |

|                        |         |         |
|------------------------|---------|---------|
| <b>J_C_rightconvex</b> | 0.60    | 0.60    |
| <b>P_turning</b>       | 0.01    | 0.01    |
| <b>final_structure</b> | neither | neither |
| <b>U_supported</b>     | False   | 0.00    |
| <b>J_supported</b>     | False   | 0.00    |

Table S6cq. Namibia Cantril U-shape ratings, 2006-2024

| KPI                       | Mean    | 2005 | 2006 | 2007    | 2008 | 2009 | 2010 | 2011 | 2012 | 2013 | 2014    | 2015 | 2016 | 2017 | 2018  | 2019 | 2020 | 2021 | 2022 | 2023    | 2024    |
|---------------------------|---------|------|------|---------|------|------|------|------|------|------|---------|------|------|------|-------|------|------|------|------|---------|---------|
| <b>shape_class</b>        | neither |      |      | neither |      |      |      |      |      |      | neither |      |      |      | U     |      |      |      |      | neither | neither |
| <b>U_beauty</b>           | 0.01    |      |      | 0.00    |      |      |      |      |      |      | 0.00    |      |      |      | 0.04  |      |      |      |      | 0.00    | 0.00    |
| <b>J_beauty</b>           | 0.00    |      |      | 0.00    |      |      |      |      |      |      | 0.00    |      |      |      | 0.00  |      |      |      |      | 0.00    | 0.00    |
| <b>Dominance</b>          | 1.00    |      |      |         |      |      |      |      |      |      |         |      |      |      | 1.00  |      |      |      |      |         |         |
| <b>best_df</b>            | 4.40    |      |      | 5.00    |      |      |      |      |      |      | 4.00    |      |      |      | 3.00  |      |      |      |      | 5.00    | 5.00    |
| <b>p_value</b>            | 0.09    |      |      | 0.00    |      |      |      |      |      |      | 0.07    |      |      |      | 0.38  |      |      |      |      | 0.01    | 0.00    |
| <b>lr_stat</b>            | 30.32   |      |      | 51.45   |      |      |      |      |      |      | 14.30   |      |      |      | 7.49  |      |      |      |      | 23.27   | 55.12   |
| <b>linear_aic</b>         | 38.02   |      |      | 29.57   |      |      |      |      |      |      | 24.25   |      |      |      | 45.02 |      |      |      |      | 34.35   | 56.91   |
| <b>spline_aic</b>         | 24.49   |      |      | -3.88   |      |      |      |      |      |      | 25.95   |      |      |      | 51.53 |      |      |      |      | 29.07   | 19.79   |
| <b>min_age</b>            | 86.24   |      |      |         |      |      |      |      |      |      | 88.99   |      |      |      | 81.66 |      |      |      |      | 88.05   |         |
| <b>min_value</b>          | 2.97    |      |      |         |      |      |      |      |      |      | 2.51    |      |      |      | 3.53  |      |      |      |      | 2.86    |         |
| <b>amplitude</b>          | 3.47    |      |      | 2.71    |      |      |      |      |      |      | 3.11    |      |      |      | 2.26  |      |      |      |      | 2.93    | 6.36    |
| <b>delta_endpoints</b>    | -1.92   |      |      | -2.16   |      |      |      |      |      |      | -2.62   |      |      |      | -0.24 |      |      |      |      | -0.25   | -4.32   |
| <b>n_minima</b>           | 3.00    |      |      | 2.00    |      |      |      |      |      |      | 3.00    |      |      |      | 2.00  |      |      |      |      | 4.00    | 4.00    |
| <b>n_maxima</b>           | 3.20    |      |      | 3.00    |      |      |      |      |      |      | 2.00    |      |      |      | 2.00  |      |      |      |      | 4.00    | 5.00    |
| <b>turning_points</b>     | 6.20    |      |      | 5.00    |      |      |      |      |      |      | 5.00    |      |      |      | 4.00  |      |      |      |      | 8.00    | 9.00    |
| <b>r_trough</b>           | 0.95    |      |      | 1.00    |      |      |      |      |      |      | 0.96    |      |      |      | 0.86  |      |      |      |      | 0.95    | 1.00    |
| <b>interior_indicator</b> | False   |      |      | 0.00    |      |      |      |      |      |      | 0.00    |      |      |      | 1.00  |      |      |      |      | 0.00    | 0.00    |
| <b>trough_indicator</b>   | True    |      |      | 0.00    |      |      |      |      |      |      | 1.00    |      |      |      | 1.00  |      |      |      |      | 1.00    | 0.00    |
| <b>U_D_depth</b>          | 0.29    |      |      | 0.00    |      |      |      |      |      |      | 0.16    |      |      |      | 0.57  |      |      |      |      | 0.73    | 0.00    |
| <b>U_I_interiority</b>    | 0.02    |      |      | 0.00    |      |      |      |      |      |      | 0.00    |      |      |      | 0.09  |      |      |      |      | 0.00    | 0.00    |
| <b>U_M_monotonicity</b>   | 0.48    |      |      | 0.00    |      |      |      |      |      |      | 0.87    |      |      |      | 0.78  |      |      |      |      | 0.77    | 0.00    |
| <b>U_C_convexity</b>      | 0.48    |      |      | 0.00    |      |      |      |      |      |      | 0.77    |      |      |      | 1.00  |      |      |      |      | 0.66    | 0.00    |
| <b>U_S_symmetry</b>       | 0.43    |      |      | 0.00    |      |      |      |      |      |      | 0.27    |      |      |      | 0.91  |      |      |      |      | 0.95    | 0.00    |
| <b>J_R_rise</b>           | 0.00    |      |      | 0.00    |      |      |      |      |      |      | 0.00    |      |      |      | 0.00  |      |      |      |      | 0.00    | 0.00    |
| <b>J_M_monotonicity</b>   | 0.44    |      |      | 0.46    |      |      |      |      |      |      | 0.27    |      |      |      | 0.48  |      |      |      |      | 0.44    | 0.56    |
| <b>J_C_rightconvex</b>    | 0.58    |      |      | 0.47    |      |      |      |      |      |      | 0.44    |      |      |      | 1.00  |      |      |      |      | 0.59    | 0.42    |
| <b>P_turning</b>          | 0.05    |      |      | 0.06    |      |      |      |      |      |      | 0.06    |      |      |      | 0.12  |      |      |      |      | 0.01    | 0.00    |
| <b>final_structure</b>    | neither |      |      | neither |      |      |      |      |      |      | neither |      |      |      | U     |      |      |      |      | neither | neither |
| <b>U_supported</b>        | False   |      |      | 0.00    |      |      |      |      |      |      | 0.00    |      |      |      | 1.00  |      |      |      |      | 0.00    | 0.00    |
| <b>J_supported</b>        | False   |      |      | 0.00    |      |      |      |      |      |      | 0.00    |      |      |      | 0.00  |      |      |      |      | 0.00    | 0.00    |

Table S6cr. Nepal Cantril U-shape ratings, 2006-2024

| KPI                | Mean    | 2005 | 2006 | 2007  | 2008 | 2009 | 2010    | 2011 | 2012    | 2013 | 2014    | 2015 | 2016 | 2017 | 2018    | 2019 | 2020 | 2021  | 2022 | 2023 | 2024    |
|--------------------|---------|------|------|-------|------|------|---------|------|---------|------|---------|------|------|------|---------|------|------|-------|------|------|---------|
| shape_class        | neither |      |      | U     |      |      | neither |      | neither |      | neither |      |      |      | neither |      |      | U     |      |      | neither |
| U_beauty           | 0.02    |      |      | 0.01  |      |      | 0.00    |      | 0.00    |      | 0.00    |      |      |      | 0.00    |      |      | 0.13  |      |      | 0.00    |
| J_beauty           | 0.00    |      |      | 0.00  |      |      | 0.00    |      | 0.00    |      | 0.00    |      |      |      | 0.00    |      |      | 0.01  |      |      | 0.00    |
| Dominance          | 0.31    |      |      | 1.00  |      |      |         |      | -1.00   |      |         |      |      |      |         |      |      | 0.92  |      |      |         |
| best_df            | 4.71    |      |      | 5.00  |      |      | 5.00    |      | 5.00    |      | 3.00    |      |      |      | 5.00    |      |      | 5.00  |      |      | 5.00    |
| p_value            | 0.00    |      |      | 0.00  |      |      | 0.00    |      | 0.00    |      | 0.00    |      |      |      | 0.00    |      |      | 0.00  |      |      | 0.00    |
| lr_stat            | 39.92   |      |      | 31.26 |      |      | 59.96   |      | 61.33   |      | 23.05   |      |      |      | 27.17   |      |      | 45.57 |      |      | 31.10   |
| linear_aic         | 37.62   |      |      | 27.44 |      |      | 50.33   |      | 39.24   |      | 40.98   |      |      |      | 38.42   |      |      | 39.71 |      |      | 27.24   |
| spline_aic         | 15.13   |      |      | 14.18 |      |      | 8.38    |      | -4.10   |      | 31.93   |      |      |      | 29.25   |      |      | 12.14 |      |      | 14.14   |
| min_age            | 82.23   |      |      | 77.53 |      |      |         |      | 87.68   |      | 87.68   |      |      |      |         |      |      | 76.02 |      |      |         |
| min_value          | 3.10    |      |      | 3.81  |      |      |         |      | 2.13    |      | 2.78    |      |      |      |         |      |      | 3.69  |      |      |         |
| amplitude          | 3.24    |      |      | 2.21  |      |      | 5.55    |      | 3.87    |      | 3.37    |      |      |      | 2.75    |      |      | 2.81  |      |      | 2.12    |
| delta_endpoints    | -0.92   |      |      | -0.79 |      |      | -3.60   |      | 1.27    |      | -0.23   |      |      |      | -2.75   |      |      | 0.83  |      |      | -1.15   |
| n_minima           | 3.00    |      |      | 3.00  |      |      | 3.00    |      | 3.00    |      | 4.00    |      |      |      | 2.00    |      |      | 3.00  |      |      | 3.00    |
| n_maxima           | 2.86    |      |      | 4.00  |      |      | 3.00    |      | 2.00    |      | 3.00    |      |      |      | 2.00    |      |      | 2.00  |      |      | 4.00    |
| turning_points     | 5.86    |      |      | 7.00  |      |      | 6.00    |      | 5.00    |      | 7.00    |      |      |      | 4.00    |      |      | 5.00  |      |      | 7.00    |
| r_trough           | 0.93    |      |      | 0.81  |      |      | 1.00    |      | 0.94    |      | 0.94    |      |      |      | 1.00    |      |      | 0.79  |      |      | 1.00    |
| interior_indicator | False   |      |      | 1.00  |      |      | 0.00    |      | 0.00    |      | 0.00    |      |      |      | 0.00    |      |      | 1.00  |      |      | 0.00    |
| trough_indicator   | True    |      |      | 1.00  |      |      | 0.00    |      | 1.00    |      | 1.00    |      |      |      | 0.00    |      |      | 1.00  |      |      | 0.00    |
| U_D_depth          | 0.31    |      |      | 0.09  |      |      | 0.00    |      | 0.67    |      | 0.67    |      |      |      | 0.00    |      |      | 0.70  |      |      | 0.00    |
| U_I_interiority    | 0.07    |      |      | 0.23  |      |      | 0.00    |      | 0.00    |      | 0.00    |      |      |      | 0.00    |      |      | 0.28  |      |      | 0.00    |
| U_M_monotonicity   | 0.45    |      |      | 0.69  |      |      | 0.00    |      | 0.84    |      | 0.76    |      |      |      | 0.00    |      |      | 0.83  |      |      | 0.00    |
| U_C_convexity      | 0.45    |      |      | 0.70  |      |      | 0.00    |      | 0.65    |      | 0.81    |      |      |      | 0.03    |      |      | 0.92  |      |      | 0.03    |
| U_S_symmetry       | 0.42    |      |      | 0.34  |      |      | 0.00    |      | 0.80    |      | 0.95    |      |      |      | 0.00    |      |      | 0.83  |      |      | 0.00    |
| J_R_rise           | 0.09    |      |      | 0.00  |      |      | 0.00    |      | 0.33    |      | 0.00    |      |      |      | 0.00    |      |      | 0.30  |      |      | 0.00    |
| J_M_monotonicity   | 0.46    |      |      | 0.41  |      |      | 0.47    |      | 0.33    |      | 0.46    |      |      |      | 0.53    |      |      | 0.47  |      |      | 0.55    |
| J_C_rightconvex    | 0.53    |      |      | 0.55  |      |      | 0.54    |      | 0.55    |      | 0.51    |      |      |      | 0.43    |      |      | 0.71  |      |      | 0.45    |
| P_turning          | 0.05    |      |      | 0.01  |      |      | 0.03    |      | 0.06    |      | 0.01    |      |      |      | 0.12    |      |      | 0.06  |      |      | 0.01    |
| final_structure    | neither |      |      | U     |      |      | neither |      | neither |      | neither |      |      |      | neither |      |      | U     |      |      | neither |
| U_supported        | False   |      |      | 1.00  |      |      | 0.00    |      | 0.00    |      | 0.00    |      |      |      | 0.00    |      |      | 1.00  |      |      | 0.00    |
| J_supported        | False   |      |      | 0.00  |      |      | 0.00    |      | 0.00    |      | 0.00    |      |      |      | 0.00    |      |      | 0.00  |      |      | 0.00    |

Table S6cs. Netherlands Cantril U-shape ratings, 2006-2024

| KPI         | Mean    | 2005    | 2006 | 2007    | 2008    | 2009 | 2010    | 2011 | 2012 | 2013 | 2014 | 2015    | 2016 | 2017 | 2018    | 2019    | 2020    | 2021    | 2022    | 2023    | 2024    |
|-------------|---------|---------|------|---------|---------|------|---------|------|------|------|------|---------|------|------|---------|---------|---------|---------|---------|---------|---------|
| shape_class | neither | neither |      | neither | neither |      | neither |      | U    |      | U    | neither | U    | U    | neither |
| U_beauty    | 0.01    | 0.00    |      | 0.00    | 0.00    |      | 0.00    |      | 0.10 |      | 0.00 | 0.00    | 0.02 | 0.08 | 0.00    | 0.00    | 0.00    | 0.00    | 0.00    | 0.00    | 0.00    |
| J_beauty    | 0.00    | 0.01    |      | 0.00    | 0.00    |      | 0.00    |      | 0.00 |      | 0.00 | 0.00    | 0.00 | 0.00 | 0.00    | 0.00    | 0.00    | 0.00    | 0.00    | 0.00    | 0.01    |
| Dominance   | -0.21   | -1.00   |      | -1.00   | -1.00   |      |         |      | 1.00 |      | 1.00 |         | 1.00 | 0.92 | -1.00   |         |         |         |         |         | -1.00   |
| best_df     | 3.81    | 3.00    |      | 5.00    | 4.00    |      | 4.00    |      | 3.00 |      | 5.00 | 3.00    | 5.00 | 5.00 | 3.00    | 3.00    | 4.00    | 3.00    | 5.00    | 3.00    | 3.00    |
| p_value     | 0.05    | 0.19    |      | 0.00    | 0.00    |      | 0.00    |      | 0.41 |      | 0.00 | 0.01    | 0.00 | 0.00 | 0.00    | 0.00    | 0.00    | 0.00    | 0.00    | 0.00    | 0.16    |

|                           |         |         |         |         |         |       |        |         |        |        |         |         |         |         |         |         |         |
|---------------------------|---------|---------|---------|---------|---------|-------|--------|---------|--------|--------|---------|---------|---------|---------|---------|---------|---------|
| <b>lr_stat</b>            | 34.03   | 9.90    | 28.48   | 35.03   | 42.63   | 7.15  | 48.89  | 18.66   | 30.54  | 60.84  | 35.38   | 46.09   | 51.59   | 44.18   | 50.93   | 23.77   | 10.45   |
| <b>linear_aic</b>         | 3.97    | 1.29    | 11.08   | -11.29  | 13.14   | 30.77 | -16.95 | -2.25   | -0.95  | 20.52  | 7.29    | 18.38   | 0.45    | 8.69    | -5.90   | -3.79   | -6.93   |
| <b>spline_aic</b>         | -14.43  | 5.39    | 0.60    | -30.32  | -13.49  | 37.62 | -47.84 | -6.91   | -13.49 | -22.32 | -14.08  | -13.70  | -35.14  | -21.49  | -38.83  | -13.56  | -3.38   |
| <b>min_age</b>            | 68.85   |         | 87.11   | 86.74   |         | 76.40 | 83.35  | 22.64   | 61.55  | 54.78  | 86.55   |         |         |         | 89.93   | 86.17   | 22.08   |
| <b>min_value</b>          | 6.97    |         | 6.69    | 7.35    |         | 6.75  | 6.93   | 6.82    | 7.32   | 7.12   | 6.62    |         |         |         | 7.03    | 7.01    | 7.07    |
| <b>amplitude</b>          | 1.09    | 0.78    | 1.31    | 0.65    | 1.89    | 1.66  | 0.64   | 0.74    | 0.65   | 1.89   | 1.13    | 1.73    | 1.25    | 1.04    | 0.77    | 0.81    | 0.60    |
| <b>delta_endpoints</b>    | -0.21   | 0.76    | 0.35    | 0.24    | -1.89   | 0.02  | -0.56  | -0.32   | -0.49  | 1.31   | 0.32    | -1.38   | -1.25   | -0.50   | -0.47   | 0.27    | 0.21    |
| <b>n_minima</b>           | 3.38    | 3.00    | 4.00    | 3.00    | 4.00    | 3.00  | 4.00   | 3.00    | 3.00   | 4.00   | 3.00    | 3.00    | 3.00    | 3.00    | 4.00    | 4.00    | 3.00    |
| <b>n_maxima</b>           | 3.13    | 4.00    | 3.00    | 2.00    | 4.00    | 3.00  | 5.00   | 3.00    | 3.00   | 3.00   | 3.00    | 3.00    | 3.00    | 3.00    | 3.00    | 3.00    | 2.00    |
| <b>turning_points</b>     | 6.50    | 7.00    | 7.00    | 5.00    | 8.00    | 6.00  | 9.00   | 6.00    | 6.00   | 7.00   | 6.00    | 6.00    | 6.00    | 6.00    | 7.00    | 7.00    | 5.00    |
| <b>r_trough</b>           | 0.73    | 0.00    | 0.93    | 0.93    | 1.00    | 0.79  | 0.88   | 0.08    | 0.59   | 0.50   | 0.93    | 1.00    | 1.00    | 1.00    | 0.97    | 0.92    | 0.07    |
| <b>interior_indicator</b> | False   | 0.00    | 0.00    | 0.00    | 0.00    | 1.00  | 1.00   | 0.00    | 1.00   | 1.00   | 0.00    | 0.00    | 0.00    | 0.00    | 0.00    | 0.00    | 0.00    |
| <b>trough_indicator</b>   | True    | 0.00    | 1.00    | 1.00    | 0.00    | 1.00  | 1.00   | 1.00    | 1.00   | 1.00   | 1.00    | 0.00    | 0.00    | 0.00    | 1.00    | 1.00    | 1.00    |
| <b>U_D_depth</b>          | 0.33    | 0.00    | 0.73    | 0.63    | 0.00    | 0.66  | 0.12   | 0.56    | 0.13   | 0.30   | 0.72    | 0.00    | 0.00    | 0.00    | 0.14    | 0.67    | 0.64    |
| <b>U_I_interiority</b>    | 0.13    | 0.00    | 0.00    | 0.00    | 0.00    | 0.27  | 0.04   | 0.00    | 0.77   | 0.99   | 0.00    | 0.00    | 0.00    | 0.00    | 0.00    | 0.00    | 0.00    |
| <b>U_M_monotonicity</b>   | 0.50    | 0.00    | 0.81    | 0.85    | 0.00    | 0.72  | 0.66   | 0.77    | 0.66   | 0.57   | 0.75    | 0.00    | 0.00    | 0.00    | 0.76    | 0.75    | 0.76    |
| <b>U_C_convexity</b>      | 0.51    | 0.00    | 0.64    | 0.71    | 0.00    | 0.85  | 0.61   | 0.80    | 0.75   | 0.77   | 0.81    | 0.00    | 0.00    | 0.00    | 0.67    | 0.76    | 0.82    |
| <b>U_S_symmetry</b>       | 0.44    | 0.00    | 0.85    | 0.78    | 0.00    | 0.99  | 0.21   | 0.72    | 0.25   | 0.47   | 0.84    | 0.00    | 0.00    | 0.00    | 0.32    | 0.80    | 0.78    |
| <b>J_R_rise</b>           | 0.20    | 0.97    | 0.27    | 0.37    | 0.00    | 0.01  | 0.00   | 0.00    | 0.00   | 0.70   | 0.28    | 0.00    | 0.00    | 0.00    | 0.00    | 0.33    | 0.36    |
| <b>J_M_monotonicity</b>   | 0.47    | 0.58    | 0.39    | 0.34    | 0.41    | 0.43  | 0.46   | 0.55    | 0.42   | 0.50   | 0.48    | 0.49    | 0.53    | 0.53    | 0.44    | 0.48    | 0.54    |
| <b>J_C_rightconvex</b>    | 0.53    | 0.55    | 0.62    | 0.49    | 0.40    | 0.52  | 0.48   | 0.49    | 0.37   | 0.76   | 0.56    | 0.41    | 0.42    | 0.42    | 0.54    | 0.54    | 0.97    |
| <b>P_turning</b>          | 0.03    | 0.01    | 0.01    | 0.06    | 0.01    | 0.03  | 0.00   | 0.03    | 0.03   | 0.01   | 0.03    | 0.03    | 0.03    | 0.03    | 0.01    | 0.01    | 0.06    |
| <b>final_structure</b>    | neither | neither | neither | neither | neither | U     | U      | neither | U      | U      | neither |
| <b>U_supported</b>        | False   | 0.00    | 0.00    | 0.00    | 0.00    | 1.00  | 1.00   | 0.00    | 1.00   | 1.00   | 0.00    | 0.00    | 0.00    | 0.00    | 0.00    | 0.00    | 0.00    |
| <b>J_supported</b>        | False   | 0.00    | 0.00    | 0.00    | 0.00    | 0.00  | 0.00   | 0.00    | 0.00   | 0.00   | 0.00    | 0.00    | 0.00    | 0.00    | 0.00    | 0.00    | 0.00    |

Table S6ct. New Zealand Cantril U-shape ratings, 2006-2024

| KPI                    | Mean    | 2005 | 2006  | 2007    | 2008  | 2009    | 2010    | 2011    | 2012    | 2013  | 2014  | 2015   | 2016   | 2017    | 2018    | 2019  | 2020  | 2021  | 2022   | 2023    | 2024 |
|------------------------|---------|------|-------|---------|-------|---------|---------|---------|---------|-------|-------|--------|--------|---------|---------|-------|-------|-------|--------|---------|------|
| <b>shape_class</b>     | neither |      | U     | neither |       | neither | neither | neither | neither | J     | U     | J      | U      | neither | neither | J     | J     | U     | U      | neither |      |
| <b>U_beauty</b>        | 0.01    |      | 0.01  | 0.00    | 0.00  | 0.00    | 0.00    | 0.00    | 0.00    | 0.00  | 0.04  | 0.00   | 0.00   | 0.00    | 0.00    | 0.00  | 0.00  | 0.01  | 0.14   | 0.00    |      |
| <b>J_beauty</b>        | 0.00    |      | 0.00  | 0.00    | 0.00  | 0.00    | 0.00    | 0.00    | 0.00    | 0.01  | 0.00  | 0.02   | 0.01   | 0.00    | 0.00    | 0.01  | 0.00  | 0.00  | 0.00   | 0.00    |      |
| <b>Dominance</b>       | -0.37   |      | 0.52  |         | -1.00 |         | -1.00   |         | -1.00   | -1.00 | 1.00  | -1.00  | -0.98  | -1.00   |         | -1.00 | -1.00 | 1.00  | 1.00   |         |      |
| <b>best_df</b>         | 4.53    |      | 5.00  | 5.00    | 5.00  | 5.00    | 5.00    | 5.00    | 4.00    | 4.00  | 3.00  | 5.00   | 3.00   | 5.00    | 5.00    | 5.00  | 5.00  | 5.00  | 5.00   | 3.00    |      |
| <b>p_value</b>         | 0.00    |      | 0.00  | 0.00    | 0.00  | 0.00    | 0.00    | 0.00    | 0.00    | 0.00  | 0.00  | 0.00   | 0.00   | 0.00    | 0.00    | 0.07  | 0.00  | 0.00  | 0.00   |         |      |
| <b>lr_stat</b>         | 36.58   |      | 40.28 | 32.39   | 33.70 | 52.43   | 37.57   | 26.16   | 67.02   | 21.10 | 30.36 | 30.20  | 55.55  | 27.31   | 42.85   | 15.63 | 33.36 | 26.49 | 49.44  |         |      |
| <b>linear_aic</b>      | 14.42   |      | 19.78 | 16.79   | 24.23 | 18.49   | 15.26   | 16.00   | 7.23    | 10.82 | 4.31  | 5.11   | 11.10  | 13.88   | 16.30   | 8.64  | 15.26 | 18.58 | 23.35  |         |      |
| <b>spline_aic</b>      | -5.10   |      | -2.49 | 2.40    | 8.53  | -15.94  | -4.31   | 5.84    | -43.80  | 3.71  | -8.05 | -11.09 | -26.45 | 4.57    | -8.55   | 11.00 | -0.09 | 10.08 | -12.10 |         |      |
| <b>min_age</b>         | 38.32   |      | 26.21 |         | 88.24 |         | 87.86   | 87.68   | 24.33   | 30.53 | 21.51 | 24.52  | 20.76  | 23.20   | 19.63   | 18.13 | 26.77 | 37.11 |        |         |      |
| <b>min_value</b>       | 6.69    |      | 7.13  |         | 6.17  |         | 6.85    | 6.77    | 7.06    | 6.74  | 6.61  | 7.00   | 6.65   | 6.54    | 6.74    | 6.80  | 6.48  | 6.11  |        |         |      |
| <b>amplitude</b>       | 1.60    |      | 1.87  | 1.49    | 1.82  | 1.67    | 1.31    | 1.24    | 1.37    | 1.00  | 1.89  | 1.29   | 1.77   | 1.73    | 1.65    | 1.53  | 1.56  | 1.83  | 2.12   |         |      |
| <b>delta_endpoints</b> | 0.17    |      | 1.19  | -1.27   | 0.21  | -0.84   | -0.11   | 0.48    | 0.69    | -0.35 | 1.25  | 0.74   | 0.62   | -0.01   | 0.05    | 0.80  | -0.15 | 0.10  | -0.45  |         |      |
| <b>n_minima</b>        | 3.06    |      | 4.00  | 2.00    | 4.00  | 2.00    | 4.00    | 4.00    | 3.00    | 2.00  | 3.00  | 3.00   | 4.00   | 3.00    | 4.00    | 3.00  | 2.00  | 4.00  | 1.00   |         |      |
| <b>n_maxima</b>        | 2.82    |      | 3.00  | 2.00    | 3.00  | 2.00    | 3.00    | 4.00    | 3.00    | 3.00  | 2.00  | 2.00   | 3.00   | 3.00    | 4.00    | 3.00  | 3.00  | 4.00  | 1.00   |         |      |
| <b>turning_points</b>  | 5.88    |      | 7.00  | 4.00    | 7.00  | 4.00    | 7.00    | 8.00    | 6.00    | 5.00  | 5.00  | 5.00   | 7.00   | 6.00    | 8.00    | 6.00  | 5.00  | 8.00  | 2.00   |         |      |

|                           |         |      |         |         |         |         |         |      |      |      |      |         |         |      |      |      |      |         |
|---------------------------|---------|------|---------|---------|---------|---------|---------|------|------|------|------|---------|---------|------|------|------|------|---------|
| <b>r_trough</b>           | 0.41    | 0.12 | 1.00    | 0.95    | 1.00    | 0.94    | 0.94    | 0.10 | 0.18 | 0.06 | 0.10 | 0.05    | 0.08    | 0.04 | 0.02 | 0.13 | 0.27 | 1.00    |
| <b>interior_indicator</b> | False   | 1.00 | 0.00    | 0.00    | 0.00    | 0.00    | 0.00    | 0.00 | 1.00 | 0.00 | 1.00 | 0.00    | 0.00    | 0.00 | 0.00 | 1.00 | 1.00 | 0.00    |
| <b>trough_indicator</b>   | True    | 1.00 | 0.00    | 1.00    | 0.00    | 1.00    | 1.00    | 1.00 | 1.00 | 1.00 | 1.00 | 1.00    | 1.00    | 1.00 | 1.00 | 1.00 | 1.00 | 0.00    |
| <b>U_D_depth</b>          | 0.35    | 0.36 | 0.00    | 0.89    | 0.00    | 0.50    | 0.61    | 0.39 | 0.48 | 0.34 | 0.42 | 0.65    | 0.32    | 0.12 | 0.00 | 0.17 | 0.62 | 0.00    |
| <b>U_I_interiority</b>    | 0.04    | 0.06 | 0.00    | 0.00    | 0.00    | 0.00    | 0.00    | 0.00 | 0.20 | 0.00 | 0.00 | 0.00    | 0.00    | 0.00 | 0.00 | 0.08 | 0.42 | 0.00    |
| <b>U_M_monotonicity</b>   | 0.64    | 0.75 | 0.00    | 0.74    | 0.00    | 0.74    | 0.71    | 0.83 | 0.61 | 0.83 | 0.84 | 0.79    | 0.84    | 0.79 | 0.85 | 0.76 | 0.73 | 0.00    |
| <b>U_C_convexity</b>      | 0.62    | 0.82 | 0.00    | 0.65    | 0.00    | 0.81    | 0.73    | 0.77 | 0.82 | 0.69 | 0.80 | 0.65    | 1.00    | 0.67 | 0.80 | 0.59 | 0.76 | 0.00    |
| <b>U_S_symmetry</b>       | 0.59    | 0.53 | 0.00    | 0.94    | 0.00    | 0.92    | 0.76    | 0.61 | 0.73 | 0.51 | 0.60 | 0.79    | 0.99    | 0.89 | 0.01 | 0.78 | 0.96 | 0.00    |
| <b>J_R_rise</b>           | 0.23    | 0.64 | 0.00    | 0.11    | 0.00    | 0.00    | 0.38    | 0.50 | 0.00 | 0.66 | 0.58 | 0.35    | 0.00    | 0.03 | 0.52 | 0.00 | 0.06 | 0.00    |
| <b>J_M_monotonicity</b>   | 0.59    | 0.50 | 0.32    | 0.49    | 0.68    | 0.49    | 0.53    | 0.62 | 0.40 | 0.66 | 0.63 | 0.60    | 0.64    | 0.61 | 0.72 | 0.68 | 0.65 | 0.83    |
| <b>J_C_rightconvex</b>    | 0.48    | 0.60 | 0.03    | 0.55    | 0.48    | 0.50    | 0.46    | 0.51 | 0.32 | 1.00 | 0.53 | 0.73    | 0.42    | 0.41 | 0.43 | 0.41 | 0.35 | 0.39    |
| <b>P_turning</b>          | 0.07    | 0.01 | 0.12    | 0.01    | 0.12    | 0.01    | 0.01    | 0.03 | 0.06 | 0.06 | 0.06 | 0.01    | 0.03    | 0.01 | 0.03 | 0.06 | 0.01 | 0.50    |
| <b>final_structure</b>    | neither | U    | neither | neither | neither | neither | neither | J    | U    | J    | U    | neither | neither | J    | J    | U    | U    | neither |
| <b>U_supported</b>        | False   | 1.00 | 0.00    | 0.00    | 0.00    | 0.00    | 0.00    | 0.00 | 1.00 | 0.00 | 1.00 | 0.00    | 0.00    | 0.00 | 0.00 | 1.00 | 1.00 | 0.00    |
| <b>J_supported</b>        | False   | 0.00 | 0.00    | 0.00    | 0.00    | 0.00    | 0.00    | 1.00 | 0.00 | 1.00 | 0.00 | 0.00    | 0.00    | 1.00 | 1.00 | 0.00 | 0.00 | 0.00    |

Table S6cu. Nicaragua Cantril U-shape ratings, 2006-2024

| KPI                       | Mean  | 2005 | 2006  | 2007 | 2008 | 2009 | 2010  | 2011    | 2012 | 2013    | 2014 | 2015    | 2016  | 2017 | 2018 | 2019 | 2020 | 2021    | 2022  | 2023  | 2024 |
|---------------------------|-------|------|-------|------|------|------|-------|---------|------|---------|------|---------|-------|------|------|------|------|---------|-------|-------|------|
| <b>shape_class</b>        | U     |      | U     |      |      |      | U     | neither |      | neither |      | neither | U     |      |      |      |      | neither | U     | U     |      |
| <b>U_beauty</b>           | 0.08  |      | 0.02  |      |      |      | 0.43  | 0.00    |      | 0.00    |      | 0.00    | 0.08  |      |      |      |      | 0.00    | 0.09  | 0.14  |      |
| <b>J_beauty</b>           | 0.00  |      | 0.00  |      |      |      | 0.00  | 0.00    |      | 0.00    |      | 0.00    | 0.00  |      |      |      |      | 0.00    | 0.00  | 0.00  |      |
| <b>Dominance</b>          | 0.65  |      | 1.00  |      |      |      | 1.00  |         |      | -1.00   |      |         | 0.98  |      |      |      |      |         | 0.96  | 0.98  |      |
| <b>best_df</b>            | 4.67  |      | 5.00  |      |      |      | 3.00  | 5.00    |      | 5.00    |      | 4.00    | 5.00  |      |      |      |      | 5.00    | 5.00  | 5.00  |      |
| <b>p_value</b>            | 0.00  |      | 0.00  |      |      |      | 0.02  | 0.00    |      | 0.00    |      | 0.00    | 0.00  |      |      |      |      | 0.00    | 0.00  | 0.00  |      |
| <b>lr_stat</b>            | 40.03 |      | 53.41 |      |      |      | 16.46 | 38.39   |      | 54.38   |      | 40.88   | 57.73 |      |      |      |      | 31.00   | 36.04 | 31.98 |      |
| <b>linear_aic</b>         | 44.25 |      | 32.82 |      |      |      | 36.41 | 48.31   |      | 60.92   |      | 46.43   | 63.07 |      |      |      |      | 19.36   | 53.48 | 37.43 |      |
| <b>spline_aic</b>         | 21.55 |      | -2.59 |      |      |      | 33.95 | 27.92   |      | 24.54   |      | 21.55   | 23.35 |      |      |      |      | 6.37    | 35.44 | 23.45 |      |
| <b>min_age</b>            | 78.80 |      | 82.60 |      |      |      | 60.23 |         |      | 87.30   |      | 88.62   | 76.77 |      |      |      |      | 89.18   | 72.45 | 73.20 |      |
| <b>min_value</b>          | 3.14  |      | 3.09  |      |      |      | 4.43  |         |      | 0.08    |      | 0.16    | 2.95  |      |      |      |      | 4.14    | 5.03  | 5.21  |      |
| <b>amplitude</b>          | 4.73  |      | 3.23  |      |      |      | 2.08  | 4.69    |      | 7.41    |      | 6.82    | 7.53  |      |      |      |      | 3.03    | 4.95  | 2.78  |      |
| <b>delta_endpoints</b>    | -0.88 |      | -1.32 |      |      |      | -0.61 | -3.68   |      | 0.94    |      | -4.83   | 1.07  |      |      |      |      | -2.50   | 2.35  | 0.69  |      |
| <b>n_minima</b>           | 3.44  |      | 4.00  |      |      |      | 2.00  | 4.00    |      | 3.00    |      | 4.00    | 3.00  |      |      |      |      | 4.00    | 4.00  | 3.00  |      |
| <b>n_maxima</b>           | 2.89  |      | 3.00  |      |      |      | 1.00  | 4.00    |      | 2.00    |      | 4.00    | 3.00  |      |      |      |      | 3.00    | 3.00  | 3.00  |      |
| <b>turning_points</b>     | 6.33  |      | 7.00  |      |      |      | 3.00  | 8.00    |      | 5.00    |      | 8.00    | 6.00  |      |      |      |      | 7.00    | 7.00  | 6.00  |      |
| <b>r_trough</b>           | 0.84  |      | 0.87  |      |      |      | 0.58  | 1.00    |      | 0.94    |      | 0.95    | 0.80  |      |      |      |      | 0.96    | 0.74  | 0.75  |      |
| <b>interior_indicator</b> | True  |      | 1.00  |      |      |      | 1.00  | 0.00    |      | 0.00    |      | 0.00    | 1.00  |      |      |      |      | 0.00    | 1.00  | 1.00  |      |
| <b>trough_indicator</b>   | True  |      | 1.00  |      |      |      | 1.00  | 0.00    |      | 1.00    |      | 1.00    | 1.00  |      |      |      |      | 1.00    | 1.00  | 1.00  |      |
| <b>U_D_depth</b>          | 0.49  |      | 0.59  |      |      |      | 0.71  | 0.00    |      | 0.87    |      | 0.27    | 0.53  |      |      |      |      | 0.17    | 0.53  | 0.75  |      |
| <b>U_I_interiority</b>    | 0.21  |      | 0.06  |      |      |      | 0.81  | 0.00    |      | 0.00    |      | 0.00    | 0.26  |      |      |      |      | 0.00    | 0.40  | 0.38  |      |
| <b>U_M_monotonicity</b>   | 0.71  |      | 0.81  |      |      |      | 0.88  | 0.00    |      | 0.89    |      | 0.79    | 0.76  |      |      |      |      | 0.77    | 0.73  | 0.77  |      |
| <b>U_C_convexity</b>      | 0.74  |      | 0.73  |      |      |      | 1.00  | 0.53    |      | 0.66    |      | 0.78    | 0.95  |      |      |      |      | 0.73    | 0.65  | 0.65  |      |
| <b>U_S_symmetry</b>       | 0.63  |      | 0.74  |      |      |      | 0.83  | 0.00    |      | 0.93    |      | 0.43    | 0.88  |      |      |      |      | 0.30    | 0.69  | 0.86  |      |
| <b>J_R_rise</b>           | 0.11  |      | 0.00  |      |      |      | 0.00  | 0.00    |      | 0.13    |      | 0.00    | 0.14  |      |      |      |      | 0.00    | 0.47  | 0.25  |      |
| <b>J_M_monotonicity</b>   | 0.39  |      | 0.43  |      |      |      | 0.33  | 0.48    |      | 0.26    |      | 0.40    | 0.39  |      |      |      |      | 0.43    | 0.42  | 0.34  |      |

|                        |       |      |      |         |         |         |      |         |      |      |
|------------------------|-------|------|------|---------|---------|---------|------|---------|------|------|
| <b>J_C_rightconvex</b> | 0.52  | 0.58 | 0.47 | 0.36    | 0.55    | 0.45    | 0.60 | 0.43    | 0.61 | 0.63 |
| <b>P_turning</b>       | 0.05  | 0.01 | 0.25 | 0.01    | 0.06    | 0.01    | 0.03 | 0.01    | 0.01 | 0.03 |
| <b>final_structure</b> | U     | U    | U    | neither | neither | neither | U    | neither | U    | U    |
| <b>U_supported</b>     | True  | 1.00 | 1.00 | 0.00    | 0.00    | 0.00    | 1.00 | 0.00    | 1.00 | 1.00 |
| <b>J_supported</b>     | False | 0.00 | 0.00 | 0.00    | 0.00    | 0.00    | 0.00 | 0.00    | 0.00 | 0.00 |

Table S6cv. Niger Cantril U-shape ratings, 2006-2024

| KPI                       | Mean    | 2005 | 2006 | 2007 | 2008    | 2009 | 2010    | 2011 | 2012 | 2013 | 2014    | 2015 | 2016 | 2017 | 2018 | 2019 | 2020 | 2021 | 2022 | 2023 | 2024 |
|---------------------------|---------|------|------|------|---------|------|---------|------|------|------|---------|------|------|------|------|------|------|------|------|------|------|
| <b>shape_class</b>        | neither |      |      |      | neither |      | neither |      |      |      | neither |      |      |      |      |      |      |      |      |      |      |
| <b>U_beauty</b>           | 0.00    |      |      |      | 0.00    |      | 0.00    |      |      |      | 0.00    |      |      |      |      |      |      |      |      |      |      |
| <b>J_beauty</b>           | 0.00    |      |      |      | 0.00    |      | 0.00    |      |      |      | 0.00    |      |      |      |      |      |      |      |      |      |      |
| <b>Dominance</b>          | -1.00   |      |      |      | -1.00   |      |         |      |      |      | -1.00   |      |      |      |      |      |      |      |      |      |      |
| <b>best_df</b>            | 4.33    |      |      |      | 5.00    |      | 5.00    |      |      |      | 3.00    |      |      |      |      |      |      |      |      |      |      |
| <b>p_value</b>            | 0.00    |      |      |      | 0.00    |      | 0.00    |      |      |      | 0.01    |      |      |      |      |      |      |      |      |      |      |
| <b>lr_stat</b>            | 39.72   |      |      |      | 50.17   |      | 49.03   |      |      |      | 19.95   |      |      |      |      |      |      |      |      |      |      |
| <b>linear_aic</b>         | 33.20   |      |      |      | 35.44   |      | 36.01   |      |      |      | 28.14   |      |      |      |      |      |      |      |      |      |      |
| <b>spline_aic</b>         | 10.15   |      |      |      | 3.28    |      | 4.97    |      |      |      | 22.20   |      |      |      |      |      |      |      |      |      |      |
| <b>min_age</b>            | 89.12   |      |      |      | 89.37   |      | 89.74   |      |      |      | 88.24   |      |      |      |      |      |      |      |      |      |      |
| <b>min_value</b>          | 2.71    |      |      |      | 3.46    |      | 1.19    |      |      |      | 3.48    |      |      |      |      |      |      |      |      |      |      |
| <b>amplitude</b>          | 2.88    |      |      |      | 2.97    |      | 3.67    |      |      |      | 2.01    |      |      |      |      |      |      |      |      |      |      |
| <b>delta_endpoints</b>    | -0.46   |      |      |      | 0.25    |      | -1.92   |      |      |      | 0.30    |      |      |      |      |      |      |      |      |      |      |
| <b>n_minima</b>           | 3.67    |      |      |      | 3.00    |      | 4.00    |      |      |      | 4.00    |      |      |      |      |      |      |      |      |      |      |
| <b>n_maxima</b>           | 3.33    |      |      |      | 3.00    |      | 4.00    |      |      |      | 3.00    |      |      |      |      |      |      |      |      |      |      |
| <b>turning_points</b>     | 7.00    |      |      |      | 6.00    |      | 8.00    |      |      |      | 7.00    |      |      |      |      |      |      |      |      |      |      |
| <b>r_trough</b>           | 0.96    |      |      |      | 0.96    |      | 0.97    |      |      |      | 0.95    |      |      |      |      |      |      |      |      |      |      |
| <b>interior_indicator</b> | False   |      |      |      | 0.00    |      | 0.00    |      |      |      | 0.00    |      |      |      |      |      |      |      |      |      |      |
| <b>trough_indicator</b>   | True    |      |      |      | 1.00    |      | 1.00    |      |      |      | 1.00    |      |      |      |      |      |      |      |      |      |      |
| <b>U_D_depth</b>          | 0.29    |      |      |      | 0.26    |      | 0.22    |      |      |      | 0.38    |      |      |      |      |      |      |      |      |      |      |
| <b>U_I_interiority</b>    | 0.00    |      |      |      | 0.00    |      | 0.00    |      |      |      | 0.00    |      |      |      |      |      |      |      |      |      |      |
| <b>U_M_monotonicity</b>   | 0.73    |      |      |      | 0.74    |      | 0.72    |      |      |      | 0.73    |      |      |      |      |      |      |      |      |      |      |
| <b>U_C_convexity</b>      | 0.71    |      |      |      | 0.67    |      | 0.67    |      |      |      | 0.80    |      |      |      |      |      |      |      |      |      |      |
| <b>U_S_symmetry</b>       | 0.72    |      |      |      | 0.86    |      | 0.46    |      |      |      | 0.84    |      |      |      |      |      |      |      |      |      |      |
| <b>J_R_rise</b>           | 0.08    |      |      |      | 0.08    |      | 0.00    |      |      |      | 0.15    |      |      |      |      |      |      |      |      |      |      |
| <b>J_M_monotonicity</b>   | 0.49    |      |      |      | 0.48    |      | 0.49    |      |      |      | 0.50    |      |      |      |      |      |      |      |      |      |      |
| <b>J_C_rightconvex</b>    | 0.48    |      |      |      | 0.46    |      | 0.50    |      |      |      | 0.48    |      |      |      |      |      |      |      |      |      |      |
| <b>P_turning</b>          | 0.02    |      |      |      | 0.03    |      | 0.01    |      |      |      | 0.01    |      |      |      |      |      |      |      |      |      |      |
| <b>final_structure</b>    | neither |      |      |      | neither |      | neither |      |      |      | neither |      |      |      |      |      |      |      |      |      |      |
| <b>U_supported</b>        | False   |      |      |      | 0.00    |      | 0.00    |      |      |      | 0.00    |      |      |      |      |      |      |      |      |      |      |
| <b>J_supported</b>        | False   |      |      |      | 0.00    |      | 0.00    |      |      |      | 0.00    |      |      |      |      |      |      |      |      |      |      |

Table S6cw. Nigeria Cantril U-shape ratings, 2006-2024

| KPI                | Mean  | 2005 | 2006 | 2007 | 2008 | 2009 | 2010 | 2011 | 2012 | 2013 | 2014 | 2015 | 2016 | 2017 | 2018 | 2019  | 2020 | 2021 | 2022 | 2023 | 2024 |  |
|--------------------|-------|------|------|------|------|------|------|------|------|------|------|------|------|------|------|-------|------|------|------|------|------|--|
| shape_class        | U     |      |      |      |      |      |      |      |      |      |      |      |      |      |      | U     |      |      |      |      |      |  |
| U_beauty           | 0.02  |      |      |      |      |      |      |      |      |      |      |      |      |      |      | 0.02  |      |      |      |      |      |  |
| J_beauty           | 0.00  |      |      |      |      |      |      |      |      |      |      |      |      |      |      | 0.00  |      |      |      |      |      |  |
| Dominance          | 0.99  |      |      |      |      |      |      |      |      |      |      |      |      |      |      | 0.99  |      |      |      |      |      |  |
| best_df            | 5.00  |      |      |      |      |      |      |      |      |      |      |      |      |      |      | 5.00  |      |      |      |      |      |  |
| p_value            | 0.00  |      |      |      |      |      |      |      |      |      |      |      |      |      |      | 0.00  |      |      |      |      |      |  |
| lr_stat            | 29.68 |      |      |      |      |      |      |      |      |      |      |      |      |      |      | 29.68 |      |      |      |      |      |  |
| linear_aic         | 58.87 |      |      |      |      |      |      |      |      |      |      |      |      |      |      | 58.87 |      |      |      |      |      |  |
| spline_aic         | 47.19 |      |      |      |      |      |      |      |      |      |      |      |      |      |      | 47.19 |      |      |      |      |      |  |
| min_age            | 79.03 |      |      |      |      |      |      |      |      |      |      |      |      |      |      | 79.03 |      |      |      |      |      |  |
| min_value          | 3.33  |      |      |      |      |      |      |      |      |      |      |      |      |      |      | 3.33  |      |      |      |      |      |  |
| amplitude          | 7.01  |      |      |      |      |      |      |      |      |      |      |      |      |      |      | 7.01  |      |      |      |      |      |  |
| delta_endpoints    | 0.17  |      |      |      |      |      |      |      |      |      |      |      |      |      |      | 0.17  |      |      |      |      |      |  |
| n_minima           | 3.00  |      |      |      |      |      |      |      |      |      |      |      |      |      |      | 3.00  |      |      |      |      |      |  |
| n_maxima           | 4.00  |      |      |      |      |      |      |      |      |      |      |      |      |      |      | 4.00  |      |      |      |      |      |  |
| turning_points     | 7.00  |      |      |      |      |      |      |      |      |      |      |      |      |      |      | 7.00  |      |      |      |      |      |  |
| r_trough           | 0.83  |      |      |      |      |      |      |      |      |      |      |      |      |      |      | 0.83  |      |      |      |      |      |  |
| interior_indicator | True  |      |      |      |      |      |      |      |      |      |      |      |      |      |      | 1.00  |      |      |      |      |      |  |
| trough_indicator   | True  |      |      |      |      |      |      |      |      |      |      |      |      |      |      | 1.00  |      |      |      |      |      |  |
| U_D_depth          | 0.22  |      |      |      |      |      |      |      |      |      |      |      |      |      |      | 0.22  |      |      |      |      |      |  |
| U_I_interiority    | 0.18  |      |      |      |      |      |      |      |      |      |      |      |      |      |      | 0.18  |      |      |      |      |      |  |
| U_M_monotonicity   | 0.67  |      |      |      |      |      |      |      |      |      |      |      |      |      |      | 0.67  |      |      |      |      |      |  |
| U_C_convexity      | 0.62  |      |      |      |      |      |      |      |      |      |      |      |      |      |      | 0.62  |      |      |      |      |      |  |
| U_S_symmetry       | 0.95  |      |      |      |      |      |      |      |      |      |      |      |      |      |      | 0.95  |      |      |      |      |      |  |
| J_R_rise           | 0.02  |      |      |      |      |      |      |      |      |      |      |      |      |      |      | 0.02  |      |      |      |      |      |  |
| J_M_monotonicity   | 0.44  |      |      |      |      |      |      |      |      |      |      |      |      |      |      | 0.44  |      |      |      |      |      |  |
| J_C_rightconvex    | 0.49  |      |      |      |      |      |      |      |      |      |      |      |      |      |      | 0.49  |      |      |      |      |      |  |
| P_turning          | 0.01  |      |      |      |      |      |      |      |      |      |      |      |      |      |      | 0.01  |      |      |      |      |      |  |
| final_structure    | U     |      |      |      |      |      |      |      |      |      |      |      |      |      |      | U     |      |      |      |      |      |  |
| U_supported        | True  |      |      |      |      |      |      |      |      |      |      |      |      |      |      | 1.00  |      |      |      |      |      |  |
| J_supported        | False |      |      |      |      |      |      |      |      |      |      |      |      |      |      | 0.00  |      |      |      |      |      |  |

Table S6cx. North Macedonia Cantril U-shape ratings, 2006-2024

| KPI         | Mean    | 2005 | 2006 | 2007 | 2008 | 2009 | 2010 | 2011 | 2012    | 2013    | 2014 | 2015    | 2016    | 2017 | 2018    | 2019    | 2020 | 2021 | 2022    | 2023 | 2024 |
|-------------|---------|------|------|------|------|------|------|------|---------|---------|------|---------|---------|------|---------|---------|------|------|---------|------|------|
| shape_class | neither |      |      |      |      |      |      |      | neither | neither | U    | neither | neither | U    | neither | neither |      | U    | neither |      | U    |
| U_beauty    | 0.10    |      |      |      |      |      |      |      | 0.00    | 0.00    | 0.74 | 0.00    | 0.00    | 0.16 | 0.00    | 0.00    |      | 0.23 | 0.00    |      | 0.02 |
| J_beauty    | 0.00    |      |      |      |      |      |      |      | 0.00    | 0.00    | 0.00 | 0.00    | 0.00    | 0.00 | 0.00    | 0.00    |      | 0.00 | 0.00    |      | 0.01 |
| Dominance   | 0.22    |      |      |      |      |      |      |      |         |         | 1.00 |         | -1.00   | 0.99 |         | -1.00   |      | 1.00 |         |      | 0.32 |
| best_df     | 4.18    |      |      |      |      |      |      |      | 5.00    | 3.00    | 3.00 | 5.00    | 5.00    | 5.00 | 5.00    | 5.00    |      | 3.00 | 4.00    |      | 3.00 |
| p_value     | 0.00    |      |      |      |      |      |      |      | 0.00    | 0.00    | 0.00 | 0.00    | 0.00    | 0.00 | 0.00    | 0.00    |      | 0.01 | 0.00    |      | 0.00 |

|                           |         |         |         |       |         |         |       |         |         |       |         |       |
|---------------------------|---------|---------|---------|-------|---------|---------|-------|---------|---------|-------|---------|-------|
| <b>lr_stat</b>            | 46.80   | 41.30   | 26.55   | 56.79 | 24.98   | 41.38   | 52.93 | 67.66   | 53.06   | 18.42 | 56.66   | 75.06 |
| <b>linear_aic</b>         | 37.43   | 25.69   | 21.76   | 33.44 | 19.66   | 39.89   | 42.31 | 47.24   | 52.06   | 34.04 | 41.33   | 54.31 |
| <b>spline_aic</b>         | 7.00    | 2.39    | 9.22    | -9.35 | 12.68   | 16.51   | 7.38  | -2.42   | 17.00   | 29.63 | 0.68    | -6.75 |
| <b>min_age</b>            | 76.80   | 91.81   | 85.42   | 58.73 | 88.24   | 87.30   | 54.22 |         | 85.61   | 57.41 |         | 82.41 |
| <b>min_value</b>          | 4.30    | 4.00    | 3.86    | 4.54  | 4.16    | 3.66    | 4.72  |         | 4.17    | 4.83  |         | 4.75  |
| <b>amplitude</b>          | 3.66    | 2.61    | 2.29    | 2.15  | 2.01    | 3.33    | 3.28  | 6.92    | 4.82    | 2.52  | 5.07    | 5.27  |
| <b>delta_endpoints</b>    | -0.76   | -2.60   | -0.64   | 0.11  | -0.83   | 0.55    | 1.73  | -6.57   | 3.29    | -1.39 | -5.06   | 3.09  |
| <b>n_minima</b>           | 2.91    | 4.00    | 2.00    | 3.00  | 4.00    | 2.00    | 5.00  | 3.00    | 4.00    | 2.00  | 1.00    | 2.00  |
| <b>n_maxima</b>           | 2.36    | 3.00    | 1.00    | 2.00  | 4.00    | 1.00    | 4.00  | 4.00    | 3.00    | 1.00  | 2.00    | 1.00  |
| <b>turning_points</b>     | 5.27    | 7.00    | 3.00    | 5.00  | 8.00    | 3.00    | 9.00  | 7.00    | 7.00    | 3.00  | 3.00    | 3.00  |
| <b>r_trough</b>           | 0.83    | 1.00    | 0.91    | 0.56  | 0.95    | 0.94    | 0.50  | 1.00    | 0.91    | 0.54  | 1.00    | 0.87  |
| <b>interior_indicator</b> | False   | 0.00    | 0.00    | 1.00  | 0.00    | 0.00    | 1.00  | 0.00    | 0.00    | 1.00  | 0.00    | 1.00  |
| <b>trough_indicator</b>   | True    | 1.00    | 1.00    | 1.00  | 1.00    | 1.00    | 1.00  | 0.00    | 1.00    | 1.00  | 0.00    | 1.00  |
| <b>U_D_depth</b>          | 0.42    | 0.00    | 0.72    | 0.95  | 0.42    | 0.83    | 0.47  | 0.00    | 0.32    | 0.45  | 0.00    | 0.41  |
| <b>U_I_interiority</b>    | 0.26    | 0.00    | 0.00    | 0.86  | 0.00    | 0.00    | 0.99  | 0.00    | 0.00    | 0.90  | 0.00    | 0.07  |
| <b>U_M_monotonicity</b>   | 0.69    | 0.82    | 0.95    | 0.95  | 0.76    | 0.92    | 0.66  | 0.00    | 0.77    | 0.83  | 0.00    | 0.98  |
| <b>U_C_convexity</b>      | 0.61    | 0.71    | 0.77    | 1.00  | 0.65    | 0.66    | 0.63  | 0.00    | 0.64    | 0.94  | 0.00    | 0.68  |
| <b>U_S_symmetry</b>       | 0.52    | 0.00    | 0.84    | 0.97  | 0.67    | 0.91    | 0.64  | 0.00    | 0.48    | 0.62  | 0.00    | 0.59  |
| <b>J_R_rise</b>           | 0.18    | 0.00    | 0.00    | 0.05  | 0.00    | 0.17    | 0.53  | 0.00    | 0.68    | 0.00  | 0.00    | 0.59  |
| <b>J_M_monotonicity</b>   | 0.32    | 0.33    | 0.17    | 0.45  | 0.46    | 0.22    | 0.46  | 0.36    | 0.46    | 0.32  | 0.15    | 0.17  |
| <b>J_C_rightconvex</b>    | 0.54    | 0.45    | 0.58    | 0.57  | 0.57    | 0.51    | 0.59  | 0.41    | 0.47    | 0.64  | 0.47    | 0.66  |
| <b>P_turning</b>          | 0.12    | 0.01    | 0.25    | 0.06  | 0.01    | 0.25    | 0.00  | 0.01    | 0.01    | 0.25  | 0.25    | 0.25  |
| <b>final_structure</b>    | neither | neither | neither | U     | neither | neither | U     | neither | neither | U     | neither | U     |
| <b>U_supported</b>        | False   | 0.00    | 0.00    | 1.00  | 0.00    | 0.00    | 1.00  | 0.00    | 0.00    | 1.00  | 0.00    | 1.00  |
| <b>J_supported</b>        | False   | 0.00    | 0.00    | 0.00  | 0.00    | 0.00    | 0.00  | 0.00    | 0.00    | 0.00  | 0.00    | 0.00  |

Table S6cy. Northern Cyprus Cantril U-shape ratings, 2006-2024

| KPI                    | Mean  | 2005 | 2006 | 2007 | 2008 | 2009 | 2010 | 2011 | 2012 | 2013 | 2014 | 2015 | 2016 | 2017 | 2018 | 2019 | 2020 | 2021 | 2022 | 2023 | 2024 |       |
|------------------------|-------|------|------|------|------|------|------|------|------|------|------|------|------|------|------|------|------|------|------|------|------|-------|
| <b>shape_class</b>     | U     |      |      |      |      |      |      |      |      |      |      |      |      |      |      |      |      |      |      |      |      | U     |
| <b>U_beauty</b>        | 0.01  |      |      |      |      |      |      |      |      |      |      |      |      |      |      |      |      |      |      |      |      | 0.01  |
| <b>J_beauty</b>        | 0.01  |      |      |      |      |      |      |      |      |      |      |      |      |      |      |      |      |      |      |      |      | 0.01  |
| <b>Dominance</b>       | -0.01 |      |      |      |      |      |      |      |      |      |      |      |      |      |      |      |      |      |      |      |      | -0.01 |
| <b>best_df</b>         | 5.00  |      |      |      |      |      |      |      |      |      |      |      |      |      |      |      |      |      |      |      |      | 5.00  |
| <b>p_value</b>         | 0.00  |      |      |      |      |      |      |      |      |      |      |      |      |      |      |      |      |      |      |      |      | 0.00  |
| <b>lr_stat</b>         | 43.04 |      |      |      |      |      |      |      |      |      |      |      |      |      |      |      |      |      |      |      |      | 43.04 |
| <b>linear_aic</b>      | 41.78 |      |      |      |      |      |      |      |      |      |      |      |      |      |      |      |      |      |      |      |      | 41.78 |
| <b>spline_aic</b>      | 16.74 |      |      |      |      |      |      |      |      |      |      |      |      |      |      |      |      |      |      |      |      | 16.74 |
| <b>min_age</b>         | 83.35 |      |      |      |      |      |      |      |      |      |      |      |      |      |      |      |      |      |      |      |      | 83.35 |
| <b>min_value</b>       | 4.16  |      |      |      |      |      |      |      |      |      |      |      |      |      |      |      |      |      |      |      |      | 4.16  |
| <b>amplitude</b>       | 3.84  |      |      |      |      |      |      |      |      |      |      |      |      |      |      |      |      |      |      |      |      | 3.84  |
| <b>delta_endpoints</b> | 2.20  |      |      |      |      |      |      |      |      |      |      |      |      |      |      |      |      |      |      |      |      | 2.20  |
| <b>n_minima</b>        | 3.00  |      |      |      |      |      |      |      |      |      |      |      |      |      |      |      |      |      |      |      |      | 3.00  |
| <b>n_maxima</b>        | 2.00  |      |      |      |      |      |      |      |      |      |      |      |      |      |      |      |      |      |      |      |      | 2.00  |
| <b>turning_points</b>  | 5.00  |      |      |      |      |      |      |      |      |      |      |      |      |      |      |      |      |      |      |      |      | 5.00  |

|                           |       |      |
|---------------------------|-------|------|
| <b>r_trough</b>           | 0.88  | 0.88 |
| <b>interior_indicator</b> | True  | 1.00 |
| <b>trough_indicator</b>   | True  | 1.00 |
| <b>U_D_depth</b>          | 0.43  | 0.43 |
| <b>U_I_interiority</b>    | 0.04  | 0.04 |
| <b>U_M_monotonicity</b>   | 0.81  | 0.81 |
| <b>U_C_convexity</b>      | 0.87  | 0.87 |
| <b>U_S_symmetry</b>       | 0.60  | 0.60 |
| <b>J_R_rise</b>           | 0.57  | 0.57 |
| <b>J_M_monotonicity</b>   | 0.42  | 0.42 |
| <b>J_C_rightconvex</b>    | 0.76  | 0.76 |
| <b>P_turning</b>          | 0.06  | 0.06 |
| <b>final_structure</b>    | U     | U    |
| <b>U_supported</b>        | True  | 1.00 |
| <b>J_supported</b>        | False | 0.00 |

Table S6cz. Norway Cantril U-shape ratings, 2006-2024

| KPI                       | Mean    | 2005 | 2006 | 2007 | 2008   | 2009 | 2010 | 2011 | 2012 | 2013 | 2014 | 2015 | 2016 | 2017    | 2018   | 2019    | 2020    | 2021    | 2022    | 2023    | 2024    |
|---------------------------|---------|------|------|------|--------|------|------|------|------|------|------|------|------|---------|--------|---------|---------|---------|---------|---------|---------|
| <b>shape_class</b>        | neither |      |      |      | U      |      |      |      |      |      |      |      |      | neither | J      | neither | neither | neither | neither | neither | neither |
| <b>U_beauty</b>           | 0.00    |      |      |      | 0.01   |      |      |      |      |      |      |      |      | 0.00    | 0.00   | 0.00    | 0.00    | 0.00    | 0.00    | 0.00    | 0.00    |
| <b>J_beauty</b>           | 0.00    |      |      |      | 0.02   |      |      |      |      |      |      |      |      | 0.00    | 0.01   | 0.00    | 0.00    | 0.00    | 0.00    | 0.00    | 0.00    |
| <b>Dominance</b>          | -0.58   |      |      |      | -0.17  |      |      |      |      |      |      |      |      |         | -1.00  |         |         |         |         |         |         |
| <b>best_df</b>            | 4.44    |      |      |      | 3.00   |      |      |      |      |      |      |      |      | 4.00    | 4.00   | 5.00    | 5.00    | 5.00    | 4.00    | 5.00    | 5.00    |
| <b>p_value</b>            | 0.00    |      |      |      | 0.00   |      |      |      |      |      |      |      |      | 0.00    | 0.00   | 0.00    | 0.00    | 0.00    | 0.00    | 0.00    | 0.00    |
| <b>lr_stat</b>            | 46.14   |      |      |      | 54.85  |      |      |      |      |      |      |      |      | 29.45   | 30.48  | 36.40   | 56.41   | 67.72   | 28.22   | 73.54   | 38.23   |
| <b>linear_aic</b>         | 18.44   |      |      |      | 30.78  |      |      |      |      |      |      |      |      | 6.50    | -7.27  | 4.49    | 33.54   | 36.74   | 17.27   | 35.37   | 8.53    |
| <b>spline_aic</b>         | -10.81  |      |      |      | -10.06 |      |      |      |      |      |      |      |      | -6.95   | -21.75 | -13.90  | -4.87   | -12.98  | 5.06    | -20.17  | -11.71  |
| <b>min_age</b>            | 36.47   |      |      |      | 28.47  |      |      |      |      |      |      |      |      | 22.08   | 21.32  | 86.55   |         |         | 23.95   |         |         |
| <b>min_value</b>          | 7.08    |      |      |      | 7.20   |      |      |      |      |      |      |      |      | 7.28    | 7.00   | 7.00    |         |         | 6.91    |         |         |
| <b>amplitude</b>          | 1.85    |      |      |      | 2.81   |      |      |      |      |      |      |      |      | 1.03    | 1.01   | 0.79    | 2.83    | 3.17    | 1.07    | 2.87    | 1.09    |
| <b>delta_endpoints</b>    | -0.62   |      |      |      | 2.16   |      |      |      |      |      |      |      |      | -0.31   | 0.57   | -0.04   | -2.08   | -2.62   | -0.95   | -2.06   | -0.24   |
| <b>n_minima</b>           | 3.11    |      |      |      | 3.00   |      |      |      |      |      |      |      |      | 4.00    | 3.00   | 3.00    | 2.00    | 3.00    | 3.00    | 4.00    | 3.00    |
| <b>n_maxima</b>           | 3.11    |      |      |      | 2.00   |      |      |      |      |      |      |      |      | 3.00    | 3.00   | 3.00    | 3.00    | 3.00    | 3.00    | 4.00    | 4.00    |
| <b>turning_points</b>     | 6.22    |      |      |      | 5.00   |      |      |      |      |      |      |      |      | 7.00    | 6.00   | 6.00    | 5.00    | 6.00    | 6.00    | 8.00    | 7.00    |
| <b>r_trough</b>           | 0.59    |      |      |      | 0.15   |      |      |      |      |      |      |      |      | 0.07    | 0.06   | 0.93    | 1.00    | 1.00    | 0.09    | 1.00    | 1.00    |
| <b>interior_indicator</b> | False   |      |      |      | 1.00   |      |      |      |      |      |      |      |      | 0.00    | 0.00   | 0.00    | 0.00    | 0.00    | 0.00    | 0.00    | 0.00    |
| <b>trough_indicator</b>   | True    |      |      |      | 1.00   |      |      |      |      |      |      |      |      | 1.00    | 1.00   | 1.00    | 0.00    | 0.00    | 1.00    | 0.00    | 0.00    |
| <b>U_D_depth</b>          | 0.26    |      |      |      | 0.23   |      |      |      |      |      |      |      |      | 0.70    | 0.43   | 0.90    | 0.00    | 0.00    | 0.10    | 0.00    | 0.00    |
| <b>U_I_interiority</b>    | 0.01    |      |      |      | 0.13   |      |      |      |      |      |      |      |      | 0.00    | 0.00   | 0.00    | 0.00    | 0.00    | 0.00    | 0.00    | 0.00    |
| <b>U_M_monotonicity</b>   | 0.44    |      |      |      | 0.80   |      |      |      |      |      |      |      |      | 0.78    | 0.84   | 0.79    | 0.00    | 0.00    | 0.75    | 0.00    | 0.00    |
| <b>U_C_convexity</b>      | 0.50    |      |      |      | 0.99   |      |      |      |      |      |      |      |      | 0.69    | 0.73   | 0.70    | 0.00    | 0.63    | 0.77    | 0.00    | 0.00    |
| <b>U_S_symmetry</b>       | 0.33    |      |      |      | 0.38   |      |      |      |      |      |      |      |      | 0.82    | 0.60   | 0.97    | 0.00    | 0.00    | 0.18    | 0.00    | 0.00    |
| <b>J_R_rise</b>           | 0.15    |      |      |      | 0.77   |      |      |      |      |      |      |      |      | 0.00    | 0.56   | 0.00    | 0.00    | 0.00    | 0.00    | 0.00    | 0.00    |
| <b>J_M_monotonicity</b>   | 0.53    |      |      |      | 0.54   |      |      |      |      |      |      |      |      | 0.56    | 0.67   | 0.43    | 0.51    | 0.47    | 0.51    | 0.55    | 0.54    |

|                        |         |      |  |  |  |  |  |  |  |  |  |  |  |         |      |         |         |         |         |         |         |
|------------------------|---------|------|--|--|--|--|--|--|--|--|--|--|--|---------|------|---------|---------|---------|---------|---------|---------|
| <b>J_C_rightconvex</b> | 0.45    | 1.00 |  |  |  |  |  |  |  |  |  |  |  | 0.47    | 0.60 | 0.48    | 0.19    | 0.33    | 0.35    | 0.18    | 0.49    |
| <b>P_turning</b>       | 0.03    | 0.06 |  |  |  |  |  |  |  |  |  |  |  | 0.01    | 0.03 | 0.03    | 0.06    | 0.03    | 0.03    | 0.01    | 0.01    |
| <b>final_structure</b> | neither | U    |  |  |  |  |  |  |  |  |  |  |  | neither | J    | neither | neither | neither | neither | neither | neither |
| <b>U_supported</b>     | False   | 1.00 |  |  |  |  |  |  |  |  |  |  |  | 0.00    | 0.00 | 0.00    | 0.00    | 0.00    | 0.00    | 0.00    | 0.00    |
| <b>J_supported</b>     | False   | 0.00 |  |  |  |  |  |  |  |  |  |  |  | 0.00    | 1.00 | 0.00    | 0.00    | 0.00    | 0.00    | 0.00    | 0.00    |

Table S6da. Pakistan Cantril U-shape ratings, 2006-2024

| KPI                       | Mean  | 2005 | 2006 | 2007 | 2008 | 2009 | 2010 | 2011 | 2012 | 2013  | 2014 | 2015 | 2016 | 2017 | 2018 | 2019 | 2020 | 2021 | 2022    | 2023 | 2024 |
|---------------------------|-------|------|------|------|------|------|------|------|------|-------|------|------|------|------|------|------|------|------|---------|------|------|
| <b>shape_class</b>        | U     |      |      |      |      |      |      |      |      | U     |      |      |      |      |      |      |      |      | neither |      |      |
| <b>U_beauty</b>           | 0.02  |      |      |      |      |      |      |      |      | 0.04  |      |      |      |      |      |      |      |      | 0.00    |      |      |
| <b>J_beauty</b>           | 0.00  |      |      |      |      |      |      |      |      | 0.00  |      |      |      |      |      |      |      |      | 0.00    |      |      |
| <b>Dominance</b>          | 1.00  |      |      |      |      |      |      |      |      | 1.00  |      |      |      |      |      |      |      |      |         |      |      |
| <b>best_df</b>            | 4.50  |      |      |      |      |      |      |      |      | 4.00  |      |      |      |      |      |      |      |      | 5.00    |      |      |
| <b>p_value</b>            | 0.00  |      |      |      |      |      |      |      |      | 0.00  |      |      |      |      |      |      |      |      | 0.00    |      |      |
| <b>lr_stat</b>            | 38.56 |      |      |      |      |      |      |      |      | 22.16 |      |      |      |      |      |      |      |      | 54.96   |      |      |
| <b>linear_aic</b>         | 41.86 |      |      |      |      |      |      |      |      | 20.87 |      |      |      |      |      |      |      |      | 62.86   |      |      |
| <b>spline_aic</b>         | 20.30 |      |      |      |      |      |      |      |      | 14.71 |      |      |      |      |      |      |      |      | 25.89   |      |      |
| <b>min_age</b>            | 71.32 |      |      |      |      |      |      |      |      | 71.32 |      |      |      |      |      |      |      |      |         |      |      |
| <b>min_value</b>          | 4.64  |      |      |      |      |      |      |      |      | 4.64  |      |      |      |      |      |      |      |      |         |      |      |
| <b>amplitude</b>          | 4.40  |      |      |      |      |      |      |      |      | 1.47  |      |      |      |      |      |      |      |      | 7.33    |      |      |
| <b>delta_endpoints</b>    | -1.38 |      |      |      |      |      |      |      |      | -0.59 |      |      |      |      |      |      |      |      | -2.16   |      |      |
| <b>n_minima</b>           | 2.50  |      |      |      |      |      |      |      |      | 2.00  |      |      |      |      |      |      |      |      | 3.00    |      |      |
| <b>n_maxima</b>           | 3.00  |      |      |      |      |      |      |      |      | 3.00  |      |      |      |      |      |      |      |      | 3.00    |      |      |
| <b>turning_points</b>     | 5.50  |      |      |      |      |      |      |      |      | 5.00  |      |      |      |      |      |      |      |      | 6.00    |      |      |
| <b>r_trough</b>           | 0.86  |      |      |      |      |      |      |      |      | 0.72  |      |      |      |      |      |      |      |      | 1.00    |      |      |
| <b>interior_indicator</b> | True  |      |      |      |      |      |      |      |      | 1.00  |      |      |      |      |      |      |      |      | 0.00    |      |      |
| <b>trough_indicator</b>   | True  |      |      |      |      |      |      |      |      | 1.00  |      |      |      |      |      |      |      |      | 0.00    |      |      |
| <b>U_D_depth</b>          | 0.12  |      |      |      |      |      |      |      |      | 0.24  |      |      |      |      |      |      |      |      | 0.00    |      |      |
| <b>U_I_interiority</b>    | 0.22  |      |      |      |      |      |      |      |      | 0.44  |      |      |      |      |      |      |      |      | 0.00    |      |      |
| <b>U_M_monotonicity</b>   | 0.36  |      |      |      |      |      |      |      |      | 0.71  |      |      |      |      |      |      |      |      | 0.00    |      |      |
| <b>U_C_convexity</b>      | 0.46  |      |      |      |      |      |      |      |      | 0.92  |      |      |      |      |      |      |      |      | 0.00    |      |      |
| <b>U_S_symmetry</b>       | 0.27  |      |      |      |      |      |      |      |      | 0.54  |      |      |      |      |      |      |      |      | 0.00    |      |      |
| <b>J_R_rise</b>           | 0.00  |      |      |      |      |      |      |      |      | 0.00  |      |      |      |      |      |      |      |      | 0.00    |      |      |
| <b>J_M_monotonicity</b>   | 0.40  |      |      |      |      |      |      |      |      | 0.41  |      |      |      |      |      |      |      |      | 0.39    |      |      |
| <b>J_C_rightconvex</b>    | 0.44  |      |      |      |      |      |      |      |      | 0.33  |      |      |      |      |      |      |      |      | 0.55    |      |      |
| <b>P_turning</b>          | 0.05  |      |      |      |      |      |      |      |      | 0.06  |      |      |      |      |      |      |      |      | 0.03    |      |      |
| <b>final_structure</b>    | U     |      |      |      |      |      |      |      |      | U     |      |      |      |      |      |      |      |      | neither |      |      |
| <b>U_supported</b>        | True  |      |      |      |      |      |      |      |      | 1.00  |      |      |      |      |      |      |      |      | 0.00    |      |      |
| <b>J_supported</b>        | False |      |      |      |      |      |      |      |      | 0.00  |      |      |      |      |      |      |      |      | 0.00    |      |      |

Table S6db. Palestine Cantril U-shape ratings, 2006-2024

| KPI | Mean | 2005 | 2006 | 2007 | 2008 | 2009 | 2010 | 2011 | 2012 | 2013 | 2014 | 2015 | 2016 | 2017 | 2018 | 2019 | 2020 | 2021 | 2022 | 2023 | 2024 |
|-----|------|------|------|------|------|------|------|------|------|------|------|------|------|------|------|------|------|------|------|------|------|
|-----|------|------|------|------|------|------|------|------|------|------|------|------|------|------|------|------|------|------|------|------|------|

|                           |         |         |         |         |         |         |         |         |
|---------------------------|---------|---------|---------|---------|---------|---------|---------|---------|
| <b>shape_class</b>        | neither |
| <b>U_beauty</b>           | 0.00    | 0.00    | 0.00    | 0.00    | 0.00    | 0.00    | 0.00    | 0.00    |
| <b>J_beauty</b>           | 0.00    | 0.00    | 0.00    | 0.00    | 0.00    | 0.00    | 0.00    | 0.00    |
| <b>Dominance</b>          | -1.00   |         |         |         |         |         |         | -1.00   |
| <b>best_df</b>            | 3.83    | 5.00    | 3.00    | 3.00    | 3.00    | 5.00    | 4.00    |         |
| <b>p_value</b>            | 0.04    | 0.00    | 0.16    | 0.00    | 0.00    | 0.05    | 0.00    |         |
| <b>lr_stat</b>            | 32.07   | 29.05   | 10.63   | 20.60   | 25.14   | 16.66   | 90.34   |         |
| <b>linear_aic</b>         | 23.38   | 50.78   | -0.65   | 10.99   | 28.34   | 18.73   | 32.08   |         |
| <b>spline_aic</b>         | 6.98    | 39.73   | 2.72    | 4.40    | 17.20   | 20.08   | -42.26  |         |
| <b>min_age</b>            | 86.67   |         |         | 85.80   |         | 87.49   | 86.74   |         |
| <b>min_value</b>          | 3.51    |         |         | 3.86    |         | 3.50    | 3.16    |         |
| <b>amplitude</b>          | 2.74    | 5.33    | 1.15    | 1.64    | 3.50    | 1.97    | 2.84    |         |
| <b>delta_endpoints</b>    | -1.79   | -4.66   | -1.14   | -0.98   | -3.50   | -0.97   | 0.48    |         |
| <b>n_minima</b>           | 3.00    | 3.00    | 2.00    | 2.00    | 3.00    | 4.00    | 4.00    |         |
| <b>n_maxima</b>           | 3.00    | 4.00    | 3.00    | 1.00    | 3.00    | 3.00    | 4.00    |         |
| <b>turning_points</b>     | 6.00    | 7.00    | 5.00    | 3.00    | 6.00    | 7.00    | 8.00    |         |
| <b>r_trough</b>           | 0.96    | 1.00    | 1.00    | 0.92    | 1.00    | 0.94    | 0.93    |         |
| <b>interior_indicator</b> | False   | 0.00    | 0.00    | 0.00    | 0.00    | 0.00    | 0.00    |         |
| <b>trough_indicator</b>   | False   | 0.00    | 0.00    | 1.00    | 0.00    | 1.00    | 1.00    |         |
| <b>U_D_depth</b>          | 0.29    | 0.00    | 0.00    | 0.40    | 0.00    | 0.51    | 0.83    |         |
| <b>U_I_interiority</b>    | 0.00    | 0.00    | 0.00    | 0.00    | 0.00    | 0.00    | 0.00    |         |
| <b>U_M_monotonicity</b>   | 0.42    | 0.00    | 0.00    | 0.88    | 0.00    | 0.79    | 0.83    |         |
| <b>U_C_convexity</b>      | 0.61    | 0.70    | 0.80    | 0.82    | 0.00    | 0.66    | 0.69    |         |
| <b>U_S_symmetry</b>       | 0.36    | 0.00    | 0.00    | 0.57    | 0.00    | 0.67    | 0.91    |         |
| <b>J_R_rise</b>           | 0.03    | 0.00    | 0.00    | 0.00    | 0.00    | 0.00    | 0.17    |         |
| <b>J_M_monotonicity</b>   | 0.35    | 0.41    | 0.35    | 0.29    | 0.29    | 0.42    | 0.36    |         |
| <b>J_C_rightconvex</b>    | 0.48    | 0.48    | 0.32    | 0.60    | 0.45    | 0.53    | 0.51    |         |
| <b>P_turning</b>          | 0.06    | 0.01    | 0.06    | 0.25    | 0.03    | 0.01    | 0.01    |         |
| <b>final_structure</b>    | neither |         |
| <b>U_supported</b>        | False   | 0.00    | 0.00    | 0.00    | 0.00    | 0.00    | 0.00    |         |
| <b>J_supported</b>        | False   | 0.00    | 0.00    | 0.00    | 0.00    | 0.00    | 0.00    |         |

Table S6de. Panama Cantril U-shape ratings, 2006-2024

| KPI                | Mean    | 2005 | 2006 | 2007    | 2008 | 2009    | 2010 | 2011 | 2012 | 2013  | 2014  | 2015  | 2016    | 2017    | 2018 | 2019 | 2020 | 2021    | 2022 | 2023 | 2024  |
|--------------------|---------|------|------|---------|------|---------|------|------|------|-------|-------|-------|---------|---------|------|------|------|---------|------|------|-------|
| <b>shape_class</b> | neither |      |      | neither |      | neither |      |      |      | U     | U     | U     | neither | neither |      |      |      | neither |      |      | U     |
| <b>U_beauty</b>    | 0.08    |      |      | 0.00    |      | 0.00    |      |      |      | 0.00  | 0.34  | 0.21  | 0.00    | 0.00    |      |      |      | 0.00    |      |      | 0.26  |
| <b>J_beauty</b>    | 0.01    |      |      | 0.00    |      | 0.00    |      |      |      | 0.00  | 0.03  | 0.00  | 0.00    | 0.00    |      |      |      | 0.00    |      |      | 0.03  |
| <b>Dominance</b>   | 0.09    |      |      |         |      |         |      |      |      | 1.00  | 0.83  | 1.00  |         | -1.00   |      |      |      | -1.00   |      |      | 0.78  |
| <b>best_df</b>     | 4.50    |      |      | 5.00    |      | 5.00    |      |      |      | 5.00  | 4.00  | 3.00  | 5.00    | 5.00    |      |      |      | 3.00    |      |      | 5.00  |
| <b>p_value</b>     | 0.01    |      |      | 0.00    |      | 0.00    |      |      |      | 0.10  | 0.00  | 0.01  | 0.00    | 0.00    |      |      |      | 0.00    |      |      | 0.00  |
| <b>lr_stat</b>     | 40.13   |      |      | 82.49   |      | 34.78   |      |      |      | 14.55 | 52.36 | 17.95 | 24.51   | 51.04   |      |      |      | 24.95   |      |      | 52.99 |
| <b>linear_aic</b>  | 36.30   |      |      | 36.28   |      | 34.07   |      |      |      | 36.65 | 41.64 | 29.86 | 11.74   | 38.42   |      |      |      | 37.89   |      |      | 42.49 |
| <b>spline_aic</b>  | 13.17   |      |      | -28.21  |      | 17.29   |      |      |      | 40.10 | 5.28  | 25.91 | 5.22    | 5.38    |      |      |      | 26.93   |      |      | 7.49  |
| <b>min_age</b>     | 79.53   |      |      |         |      | 90.68   |      |      |      | 81.85 | 60.98 | 71.51 | 87.68   | 87.68   |      |      |      | 85.05   |      |      | 63.80 |
| <b>min_value</b>   | 5.26    |      |      |         |      | 4.77    |      |      |      | 4.96  | 5.76  | 5.73  | 5.41    | 5.30    |      |      |      | 5.16    |      |      | 5.67  |
| <b>amplitude</b>   | 3.10    |      |      | 4.15    |      | 3.13    |      |      |      | 2.47  | 3.25  | 1.88  | 1.44    | 3.19    |      |      |      | 2.80    |      |      | 3.33  |

|                    |         |         |         |       |      |       |         |         |         |         |      |
|--------------------|---------|---------|---------|-------|------|-------|---------|---------|---------|---------|------|
| delta_endpoints    | -0.25   | -4.15   | -2.56   | -2.32 | 1.46 | -0.66 | -0.85   | 1.21    | 0.74    | 3.32    | 1.35 |
| n_minima           | 3.30    | 4.00    | 4.00    | 4.00  | 2.00 | 2.00  | 4.00    | 4.00    | 3.00    | 4.00    | 2.00 |
| n_maxima           | 2.60    | 4.00    | 3.00    | 4.00  | 1.00 | 2.00  | 3.00    | 3.00    | 2.00    | 3.00    | 1.00 |
| turning_points     | 5.90    | 8.00    | 7.00    | 8.00  | 3.00 | 4.00  | 7.00    | 7.00    | 5.00    | 7.00    | 3.00 |
| r_trough           | 0.85    | 1.00    | 0.98    | 0.86  | 0.59 | 0.73  | 0.94    | 0.94    | 0.91    | 0.93    | 0.62 |
| interior_indicator | False   | 0.00    | 0.00    | 1.00  | 1.00 | 1.00  | 0.00    | 0.00    | 0.00    | 0.00    | 1.00 |
| trough_indicator   | True    | 0.00    | 1.00    | 1.00  | 1.00 | 1.00  | 1.00    | 1.00    | 1.00    | 1.00    | 1.00 |
| U_D_depth          | 0.41    | 0.00    | 0.07    | 0.03  | 0.55 | 0.65  | 0.41    | 0.62    | 0.74    | 0.38    | 0.60 |
| U_I_interiority    | 0.20    | 0.00    | 0.00    | 0.09  | 0.78 | 0.43  | 0.00    | 0.00    | 0.00    | 0.00    | 0.69 |
| U_M_monotonicity   | 0.74    | 0.00    | 0.81    | 0.64  | 0.98 | 0.88  | 0.83    | 0.80    | 0.82    | 0.78    | 0.87 |
| U_C_convexity      | 0.74    | 0.68    | 0.70    | 0.56  | 0.92 | 1.00  | 0.68    | 0.65    | 0.79    | 0.64    | 0.81 |
| U_S_symmetry       | 0.52    | 0.00    | 0.15    | 0.05  | 0.71 | 0.79  | 0.58    | 0.77    | 0.85    | 0.56    | 0.75 |
| J_R_rise           | 0.21    | 0.00    | 0.00    | 0.00  | 0.45 | 0.00  | 0.00    | 0.38    | 0.26    | 0.62    | 0.40 |
| J_M_monotonicity   | 0.41    | 0.39    | 0.36    | 0.42  | 0.44 | 0.39  | 0.35    | 0.39    | 0.39    | 0.44    | 0.53 |
| J_C_rightconvex    | 0.58    | 0.46    | 0.48    | 0.44  | 0.98 | 0.53  | 0.62    | 0.51    | 0.61    | 0.58    | 0.56 |
| P_turning          | 0.08    | 0.01    | 0.01    | 0.01  | 0.25 | 0.12  | 0.01    | 0.01    | 0.06    | 0.01    | 0.25 |
| final_structure    | neither | neither | neither | U     | U    | U     | neither | neither | neither | neither | U    |
| U_supported        | False   | 0.00    | 0.00    | 1.00  | 1.00 | 1.00  | 0.00    | 0.00    | 0.00    | 0.00    | 1.00 |
| J_supported        | False   | 0.00    | 0.00    | 0.00  | 0.00 | 0.00  | 0.00    | 0.00    | 0.00    | 0.00    | 0.00 |

Table S6df. Paraguay Cantril U-shape ratings, 2006-2024

| KPI                | Mean    | 2005 | 2006 | 2007 | 2008 | 2009    | 2010  | 2011 | 2012 | 2013  | 2014  | 2015 | 2016    | 2017 | 2018    | 2019    | 2020 | 2021  | 2022  | 2023    | 2024    |
|--------------------|---------|------|------|------|------|---------|-------|------|------|-------|-------|------|---------|------|---------|---------|------|-------|-------|---------|---------|
| shape_class        | neither |      |      |      |      | neither | U     |      |      | U     | U     |      | neither |      | neither | neither |      | U     | U     | neither | neither |
| U_beauty           | 0.02    |      |      |      |      | 0.00    | 0.00  |      |      | 0.16  | 0.06  |      | 0.00    |      | 0.00    | 0.00    |      | 0.01  | 0.02  | 0.00    | 0.00    |
| J_beauty           | 0.00    |      |      |      |      | 0.00    | 0.00  |      |      | 0.00  | 0.00  |      | 0.00    |      | 0.00    | 0.00    |      | 0.00  | 0.00  | 0.00    | 0.00    |
| Dominance          | 1.00    |      |      |      |      |         | 1.00  |      |      | 1.00  | 1.00  |      |         |      |         |         |      | 1.00  | 1.00  |         |         |
| best_df            | 4.36    |      |      |      |      | 5.00    | 3.00  |      |      | 3.00  | 5.00  |      | 5.00    |      | 5.00    | 5.00    |      | 5.00  | 3.00  | 4.00    | 5.00    |
| p_value            | 0.05    |      |      |      |      | 0.00    | 0.50  |      |      | 0.00  | 0.00  |      | 0.00    |      | 0.00    | 0.00    |      | 0.02  | 0.02  | 0.00    | 0.00    |
| lr_stat            | 32.31   |      |      |      |      | 24.17   | 6.34  |      |      | 27.04 | 40.04 |      | 55.29   |      | 34.75   | 62.31   |      | 20.42 | 16.21 | 28.50   | 40.31   |
| linear_aic         | 27.61   |      |      |      |      | 14.31   | 6.19  |      |      | 9.28  | 24.85 |      | 26.99   |      | 24.66   | 63.10   |      | 35.42 | 24.04 | 27.67   | 47.21   |
| spline_aic         | 12.03   |      |      |      |      | 8.14    | 13.85 |      |      | -3.76 | 2.82  |      | -10.30  |      | 7.92    | 18.79   |      | 33.00 | 21.84 | 15.17   | 24.91   |
| min_age            | 79.14   |      |      |      |      | 88.80   | 78.47 |      |      | 77.34 | 78.09 |      |         |      |         |         |      | 81.10 | 64.93 | 85.23   |         |
| min_value          | 4.51    |      |      |      |      | 4.25    | 4.86  |      |      | 5.14  | 3.91  |      |         |      |         |         |      | 3.34  | 4.72  | 5.33    |         |
| amplitude          | 3.31    |      |      |      |      | 2.10    | 1.58  |      |      | 1.10  | 2.26  |      | 3.37    |      | 3.81    | 8.03    |      | 3.38  | 2.65  | 2.12    | 6.05    |
| delta_endpoints    | -2.48   |      |      |      |      | -1.35   | -1.47 |      |      | -0.26 | -0.32 |      | -3.33   |      | -3.81   | -4.57   |      | -2.71 | -2.34 | -1.12   | -6.05   |
| n_minima           | 2.55    |      |      |      |      | 3.00    | 1.00  |      |      | 2.00  | 2.00  |      | 4.00    |      | 2.00    | 2.00    |      | 4.00  | 2.00  | 4.00    | 2.00    |
| n_maxima           | 2.55    |      |      |      |      | 3.00    | 2.00  |      |      | 1.00  | 3.00  |      | 5.00    |      | 2.00    | 2.00    |      | 4.00  | 1.00  | 3.00    | 2.00    |
| turning_points     | 5.09    |      |      |      |      | 6.00    | 3.00  |      |      | 3.00  | 5.00  |      | 9.00    |      | 4.00    | 4.00    |      | 8.00  | 3.00  | 7.00    | 4.00    |
| r_trough           | 0.89    |      |      |      |      | 0.96    | 0.82  |      |      | 0.80  | 0.81  |      | 1.00    |      | 1.00    | 1.00    |      | 0.85  | 0.64  | 0.91    | 1.00    |
| interior_indicator | False   |      |      |      |      | 0.00    | 1.00  |      |      | 1.00  | 1.00  |      | 0.00    |      | 0.00    | 0.00    |      | 1.00  | 1.00  | 0.00    | 0.00    |
| trough_indicator   | True    |      |      |      |      | 1.00    | 1.00  |      |      | 1.00  | 1.00  |      | 0.00    |      | 0.00    | 0.00    |      | 1.00  | 1.00  | 1.00    | 0.00    |
| U_D_depth          | 0.22    |      |      |      |      | 0.35    | 0.05  |      |      | 0.76  | 0.49  |      | 0.00    |      | 0.00    | 0.00    |      | 0.20  | 0.12  | 0.47    | 0.00    |
| U_I_interiority    | 0.13    |      |      |      |      | 0.00    | 0.20  |      |      | 0.24  | 0.21  |      | 0.00    |      | 0.00    | 0.00    |      | 0.11  | 0.65  | 0.00    | 0.00    |
| U_M_monotonicity   | 0.52    |      |      |      |      | 0.86    | 0.82  |      |      | 0.97  | 0.78  |      | 0.00    |      | 0.00    | 0.00    |      | 0.66  | 0.80  | 0.80    | 0.00    |
| U_C_convexity      | 0.50    |      |      |      |      | 0.67    | 0.82  |      |      | 1.00  | 0.73  |      | 0.00    |      | 0.00    | 0.00    |      | 0.57  | 0.97  | 0.68    | 0.00    |
| U_S_symmetry       | 0.32    |      |      |      |      | 0.52    | 0.10  |      |      | 0.87  | 0.87  |      | 0.00    |      | 0.00    | 0.00    |      | 0.33  | 0.21  | 0.64    | 0.00    |

|                         |         |  |         |      |  |      |      |         |         |         |      |      |         |         |      |      |      |      |      |      |      |      |      |
|-------------------------|---------|--|---------|------|--|------|------|---------|---------|---------|------|------|---------|---------|------|------|------|------|------|------|------|------|------|
| <b>J_R_rise</b>         | 0.00    |  | 0.00    | 0.00 |  | 0.00 | 0.00 | 0.00    | 0.00    | 0.00    | 0.00 | 0.00 | 0.00    | 0.00    | 0.00 | 0.00 | 0.00 | 0.00 | 0.00 | 0.00 | 0.00 | 0.00 | 0.00 |
| <b>J_M_monotonicity</b> | 0.28    |  | 0.30    | 0.16 |  | 0.24 | 0.30 | 0.37    | 0.20    | 0.26    | 0.43 | 0.23 | 0.42    | 0.23    |      |      |      |      |      |      |      |      |      |
| <b>J_C_rightconvex</b>  | 0.52    |  | 0.51    | 0.53 |  | 1.00 | 0.58 | 0.45    | 0.35    | 0.47    | 0.45 | 0.45 | 0.52    | 0.43    |      |      |      |      |      |      |      |      |      |
| <b>P_turning</b>        | 0.11    |  | 0.03    | 0.25 |  | 0.25 | 0.06 | 0.00    | 0.12    | 0.12    | 0.01 | 0.25 | 0.01    | 0.12    |      |      |      |      |      |      |      |      |      |
| <b>final_structure</b>  | neither |  | neither | U    |  | U    | U    | neither | neither | neither | U    | U    | neither | neither |      |      |      |      |      |      |      |      |      |
| <b>U_supported</b>      | False   |  | 0.00    | 1.00 |  | 1.00 | 1.00 | 0.00    | 0.00    | 0.00    | 1.00 | 1.00 | 0.00    | 0.00    |      |      |      |      |      |      |      |      |      |
| <b>J_supported</b>      | False   |  | 0.00    | 0.00 |  | 0.00 | 0.00 | 0.00    | 0.00    | 0.00    | 0.00 | 0.00 | 0.00    | 0.00    |      |      |      |      |      |      |      |      |      |

Table S6dg. Peru Cantril U-shape ratings, 2006-2024

| KPI                       | Mean    | 2005 | 2006    | 2007  | 2008    | 2009 | 2010 | 2011    | 2012   | 2013    | 2014    | 2015 | 2016  | 2017    | 2018 | 2019    | 2020 | 2021  | 2022    | 2023 | 2024 |  |
|---------------------------|---------|------|---------|-------|---------|------|------|---------|--------|---------|---------|------|-------|---------|------|---------|------|-------|---------|------|------|--|
| <b>shape_class</b>        | neither |      | neither | U     | neither |      |      | neither | U      | neither | neither |      | U     | neither |      | neither |      | U     | neither |      |      |  |
| <b>U_beauty</b>           | 0.01    |      | 0.00    | 0.00  | 0.00    |      |      | 0.00    | 0.05   | 0.00    | 0.00    |      | 0.02  | 0.00    |      | 0.00    |      | 0.04  | 0.00    |      |      |  |
| <b>J_beauty</b>           | 0.00    |      | 0.00    | 0.00  | 0.00    |      |      | 0.00    | 0.01   | 0.00    | 0.00    |      | 0.00  | 0.00    |      | 0.00    |      | 0.00  | 0.00    |      |      |  |
| <b>Dominance</b>          | 0.51    |      |         | 1.00  | -1.00   |      |      |         | 0.62   |         |         |      | 1.00  |         |      |         |      | 0.91  |         |      |      |  |
| <b>best_df</b>            | 4.08    |      | 4.00    | 5.00  | 4.00    |      |      | 3.00    | 5.00   | 5.00    | 3.00    |      | 5.00  | 4.00    |      | 3.00    |      | 4.00  | 4.00    |      |      |  |
| <b>p_value</b>            | 0.02    |      | 0.00    | 0.23  | 0.00    |      |      | 0.00    | 0.00   | 0.00    | 0.00    |      | 0.03  | 0.00    |      | 0.00    |      | 0.00  | 0.00    |      |      |  |
| <b>lr_stat</b>            | 40.36   |      | 47.17   | 11.73 | 43.87   |      |      | 21.54   | 100.11 | 33.86   | 41.68   |      | 18.57 | 43.88   |      | 31.87   |      | 60.55 | 29.46   |      |      |  |
| <b>linear_aic</b>         | 35.41   |      | 32.90   | 36.38 | 46.03   |      |      | 10.70   | 53.07  | 30.78   | 41.75   |      | 30.52 | 52.98   |      | 26.18   |      | 51.81 | 11.82   |      |      |  |
| <b>spline_aic</b>         | 11.22   |      | 1.73    | 42.65 | 18.16   |      |      | 3.16    | -29.04 | 14.92   | 14.08   |      | 29.95 | 25.10   |      | 8.31    |      | 7.26  | -1.65   |      |      |  |
| <b>min_age</b>            | 80.53   |      | 87.86   | 63.80 | 86.55   |      |      | 85.23   | 75.27  | 88.62   |         |      | 80.72 |         |      |         |      | 68.13 | 88.62   |      |      |  |
| <b>min_value</b>          | 4.05    |      | 1.93    | 3.96  | 4.00    |      |      | 5.19    | 4.86   | 2.70    |         |      | 4.28  |         |      |         |      | 5.16  | 4.40    |      |      |  |
| <b>amplitude</b>          | 3.61    |      | 4.04    | 2.28  | 3.99    |      |      | 1.32    | 5.14   | 3.90    | 4.34    |      | 2.66  | 6.45    |      | 2.00    |      | 4.84  | 2.33    |      |      |  |
| <b>delta_endpoints</b>    | -0.97   |      | -1.98   | -2.22 | 1.84    |      |      | -0.52   | 3.56   | -1.61   | -4.34   |      | -0.81 | -6.45   |      | -1.30   |      | 3.88  | -1.69   |      |      |  |
| <b>n_minima</b>           | 3.17    |      | 4.00    | 4.00  | 4.00    |      |      | 2.00    | 3.00   | 3.00    | 2.00    |      | 4.00  | 2.00    |      | 3.00    |      | 4.00  | 3.00    |      |      |  |
| <b>n_maxima</b>           | 2.92    |      | 3.00    | 4.00  | 3.00    |      |      | 1.00    | 2.00   | 2.00    | 3.00    |      | 4.00  | 2.00    |      | 4.00    |      | 4.00  | 3.00    |      |      |  |
| <b>turning_points</b>     | 6.08    |      | 7.00    | 8.00  | 7.00    |      |      | 3.00    | 5.00   | 5.00    | 5.00    |      | 8.00  | 4.00    |      | 7.00    |      | 8.00  | 6.00    |      |      |  |
| <b>r_trough</b>           | 0.89    |      | 0.94    | 0.62  | 0.93    |      |      | 0.91    | 0.78   | 0.95    | 1.00    |      | 0.85  | 1.00    |      | 1.00    |      | 0.68  | 0.95    |      |      |  |
| <b>interior_indicator</b> | False   |      | 0.00    | 1.00  | 0.00    |      |      | 0.00    | 1.00   | 0.00    | 0.00    |      | 1.00  | 0.00    |      | 0.00    |      | 1.00  | 0.00    |      |      |  |
| <b>trough_indicator</b>   | True    |      | 1.00    | 1.00  | 1.00    |      |      | 1.00    | 1.00   | 1.00    | 0.00    |      | 1.00  | 0.00    |      | 0.00    |      | 1.00  | 1.00    |      |      |  |
| <b>U_D_depth</b>          | 0.29    |      | 0.51    | 0.03  | 0.54    |      |      | 0.61    | 0.31   | 0.59    | 0.00    |      | 0.40  | 0.00    |      | 0.00    |      | 0.20  | 0.26    |      |      |  |
| <b>U_I_interiority</b>    | 0.14    |      | 0.00    | 0.69  | 0.00    |      |      | 0.00    | 0.31   | 0.00    | 0.00    |      | 0.13  | 0.00    |      | 0.00    |      | 0.55  | 0.00    |      |      |  |
| <b>U_M_monotonicity</b>   | 0.59    |      | 0.80    | 0.65  | 0.77    |      |      | 0.87    | 0.86   | 0.87    | 0.00    |      | 0.63  | 0.00    |      | 0.00    |      | 0.80  | 0.84    |      |      |  |
| <b>U_C_convexity</b>      | 0.56    |      | 0.74    | 0.68  | 0.68    |      |      | 0.78    | 1.00   | 0.66    | 0.00    |      | 0.61  | 0.00    |      | 0.00    |      | 0.76  | 0.76    |      |      |  |
| <b>U_S_symmetry</b>       | 0.41    |      | 0.68    | 0.05  | 0.70    |      |      | 0.76    | 0.47   | 0.74    | 0.00    |      | 0.72  | 0.00    |      | 0.00    |      | 0.33  | 0.42    |      |      |  |
| <b>J_R_rise</b>           | 0.16    |      | 0.00    | 0.00  | 0.46    |      |      | 0.00    | 0.69   | 0.00    | 0.00    |      | 0.00  | 0.00    |      | 0.00    |      | 0.80  | 0.00    |      |      |  |
| <b>J_M_monotonicity</b>   | 0.38    |      | 0.39    | 0.40  | 0.45    |      |      | 0.31    | 0.43   | 0.28    | 0.36    |      | 0.49  | 0.28    |      | 0.41    |      | 0.50  | 0.33    |      |      |  |
| <b>J_C_rightconvex</b>    | 0.53    |      | 0.46    | 0.41  | 0.50    |      |      | 0.59    | 1.00   | 0.52    | 0.43    |      | 0.48  | 0.43    |      | 0.48    |      | 0.62  | 0.44    |      |      |  |
| <b>P_turning</b>          | 0.05    |      | 0.01    | 0.01  | 0.01    |      |      | 0.25    | 0.06   | 0.06    | 0.06    |      | 0.01  | 0.12    |      | 0.01    |      | 0.01  | 0.03    |      |      |  |
| <b>final_structure</b>    | neither |      | neither | U     | neither |      |      | neither | U      | neither | neither |      | U     | neither |      | neither |      | U     | neither |      |      |  |
| <b>U_supported</b>        | False   |      | 0.00    | 1.00  | 0.00    |      |      | 0.00    | 1.00   | 0.00    | 0.00    |      | 1.00  | 0.00    |      | 0.00    |      | 1.00  | 0.00    |      |      |  |
| <b>J_supported</b>        | False   |      | 0.00    | 0.00  | 0.00    |      |      | 0.00    | 0.00   | 0.00    | 0.00    |      | 0.00  | 0.00    |      | 0.00    |      | 0.00  | 0.00    |      |      |  |

Table S6dh. Philippines Cantril U-shape ratings, 2006-2024

| KPI                | Mean    | 2005 | 2006 | 2007 | 2008 | 2009 | 2010    | 2011  | 2012    | 2013 | 2014    | 2015 | 2016  | 2017 | 2018 | 2019    | 2020 | 2021 | 2022 | 2023 | 2024  |
|--------------------|---------|------|------|------|------|------|---------|-------|---------|------|---------|------|-------|------|------|---------|------|------|------|------|-------|
| shape_class        | neither |      |      |      |      |      | neither | U     | neither |      | neither |      | U     |      |      | neither |      |      |      |      | U     |
| U_beauty           | 0.02    |      |      |      |      |      | 0.00    | 0.10  | 0.00    |      | 0.00    |      | 0.05  |      |      | 0.00    |      |      |      |      | 0.01  |
| J_beauty           | 0.01    |      |      |      |      |      | 0.00    | 0.02  | 0.00    |      | 0.00    |      | 0.02  |      |      | 0.00    |      |      |      |      | 0.01  |
| Dominance          | -0.02   |      |      |      |      |      | -1.00   | 0.65  |         |      |         |      | 0.37  |      |      |         |      |      |      |      | -0.12 |
| best_df            | 4.29    |      |      |      |      |      | 5.00    | 3.00  | 5.00    |      | 4.00    |      | 3.00  |      |      | 5.00    |      |      |      |      | 5.00  |
| p_value            | 0.00    |      |      |      |      |      | 0.00    | 0.00  | 0.00    |      | 0.00    |      | 0.00  |      |      | 0.00    |      |      |      |      | 0.00  |
| lr_stat            | 44.04   |      |      |      |      |      | 48.08   | 23.35 | 43.46   |      | 26.13   |      | 40.84 |      |      | 74.94   |      |      |      |      | 51.50 |
| linear_aic         | 41.44   |      |      |      |      |      | 33.63   | 46.52 | 28.07   |      | 34.69   |      | 46.97 |      |      | 56.12   |      |      |      |      | 44.06 |
| spline_aic         | 13.97   |      |      |      |      |      | 3.55    | 37.17 | 2.62    |      | 24.56   |      | 20.13 |      |      | -0.81   |      |      |      |      | 10.56 |
| min_age            | 59.39   |      |      |      |      |      | 87.30   | 40.50 |         |      |         |      | 78.28 |      |      |         |      |      |      |      | 31.47 |
| min_value          | 4.31    |      |      |      |      |      | 2.94    | 4.47  |         |      |         |      | 4.17  |      |      |         |      |      |      |      | 5.65  |
| amplitude          | 4.00    |      |      |      |      |      | 3.07    | 3.64  | 2.70    |      | 4.21    |      | 4.10  |      |      | 5.95    |      |      |      |      | 4.34  |
| delta_endpoints    | -0.55   |      |      |      |      |      | 0.33    | 2.26  | -2.70   |      | -4.21   |      | 2.22  |      |      | -5.50   |      |      |      |      | 3.73  |
| n_minima           | 3.29    |      |      |      |      |      | 5.00    | 2.00  | 4.00    |      | 4.00    |      | 2.00  |      |      | 3.00    |      |      |      |      | 3.00  |
| n_maxima           | 3.14    |      |      |      |      |      | 4.00    | 2.00  | 4.00    |      | 4.00    |      | 2.00  |      |      | 3.00    |      |      |      |      | 3.00  |
| turning_points     | 6.43    |      |      |      |      |      | 9.00    | 4.00  | 8.00    |      | 8.00    |      | 4.00  |      |      | 6.00    |      |      |      |      | 6.00  |
| r_trough           | 0.75    |      |      |      |      |      | 0.94    | 0.31  | 1.00    |      | 1.00    |      | 0.82  |      |      | 1.00    |      |      |      |      | 0.19  |
| interior_indicator | False   |      |      |      |      |      | 0.00    | 1.00  | 0.00    |      | 0.00    |      | 1.00  |      |      | 0.00    |      |      |      |      | 1.00  |
| trough_indicator   | True    |      |      |      |      |      | 1.00    | 1.00  | 0.00    |      | 0.00    |      | 1.00  |      |      | 0.00    |      |      |      |      | 1.00  |
| U_D_depth          | 0.27    |      |      |      |      |      | 0.89    | 0.38  | 0.00    |      | 0.00    |      | 0.46  |      |      | 0.00    |      |      |      |      | 0.14  |
| U_I_interiority    | 0.14    |      |      |      |      |      | 0.00    | 0.53  | 0.00    |      | 0.00    |      | 0.21  |      |      | 0.00    |      |      |      |      | 0.23  |
| U_M_monotonicity   | 0.44    |      |      |      |      |      | 0.79    | 0.76  | 0.00    |      | 0.00    |      | 0.78  |      |      | 0.00    |      |      |      |      | 0.75  |
| U_C_convexity      | 0.47    |      |      |      |      |      | 0.65    | 1.00  | 0.00    |      | 0.00    |      | 1.00  |      |      | 0.00    |      |      |      |      | 0.67  |
| U_S_symmetry       | 0.34    |      |      |      |      |      | 0.94    | 0.55  | 0.00    |      | 0.00    |      | 0.63  |      |      | 0.00    |      |      |      |      | 0.25  |
| J_R_rise           | 0.30    |      |      |      |      |      | 0.11    | 0.62  | 0.00    |      | 0.00    |      | 0.54  |      |      | 0.00    |      |      |      |      | 0.86  |
| J_M_monotonicity   | 0.47    |      |      |      |      |      | 0.42    | 0.42  | 0.46    |      | 0.42    |      | 0.51  |      |      | 0.48    |      |      |      |      | 0.63  |
| J_C_rightconvex    | 0.57    |      |      |      |      |      | 0.55    | 1.00  | 0.42    |      | 0.47    |      | 1.00  |      |      | 0.00    |      |      |      |      | 0.58  |
| P_turning          | 0.05    |      |      |      |      |      | 0.00    | 0.12  | 0.01    |      | 0.01    |      | 0.12  |      |      | 0.03    |      |      |      |      | 0.03  |
| final_structure    | neither |      |      |      |      |      | neither | U     | neither |      | neither |      | U     |      |      | neither |      |      |      |      | U     |
| U_supported        | False   |      |      |      |      |      | 0.00    | 1.00  | 0.00    |      | 0.00    |      | 1.00  |      |      | 0.00    |      |      |      |      | 1.00  |
| J_supported        | False   |      |      |      |      |      | 0.00    | 0.00  | 0.00    |      | 0.00    |      | 0.00  |      |      | 0.00    |      |      |      |      | 0.00  |

Table S6di. Poland Cantril U-shape ratings, 2006-2024

| KPI         | Mean    | 2005    | 2006 | 2007 | 2008 | 2009    | 2010    | 2011 | 2012    | 2013  | 2014    | 2015    | 2016    | 2017 | 2018  | 2019  | 2020  | 2021    | 2022    | 2023    | 2024  |
|-------------|---------|---------|------|------|------|---------|---------|------|---------|-------|---------|---------|---------|------|-------|-------|-------|---------|---------|---------|-------|
| shape_class | neither | neither |      |      |      | neither | neither |      | neither | U     | neither | neither | neither |      | U     | U     | U     | neither | neither | neither | U     |
| U_beauty    | 0.02    | 0.00    |      |      |      | 0.00    | 0.00    |      | 0.00    | 0.09  | 0.00    | 0.00    | 0.00    |      | 0.07  | 0.11  | 0.01  | 0.00    | 0.00    | 0.00    | 0.00  |
| J_beauty    | 0.00    | 0.00    |      |      |      | 0.00    | 0.00    |      | 0.00    | 0.00  | 0.00    | 0.00    | 0.00    |      | 0.00  | 0.00  | 0.01  | 0.00    | 0.00    | 0.00    | 0.00  |
| Dominance   | 0.87    |         |      |      |      |         |         |      |         | 1.00  |         |         |         |      | 1.00  | 0.98  | 0.36  |         |         |         | 1.00  |
| best_df     | 4.36    | 3.00    |      |      |      | 5.00    | 3.00    |      | 5.00    | 3.00  | 5.00    | 4.00    | 5.00    |      | 5.00  | 4.00  | 5.00  | 4.00    | 5.00    | 5.00    | 5.00  |
| p_value     | 0.02    | 0.00    |      |      |      | 0.00    | 0.27    |      | 0.00    | 0.00  | 0.00    | 0.00    | 0.00    |      | 0.00  | 0.00  | 0.00  | 0.00    | 0.00    | 0.00    | 0.00  |
| lr_stat     | 40.65   | 41.58   |      |      |      | 42.83   | 8.74    |      | 67.40   | 21.55 | 42.69   | 37.86   | 31.93   |      | 57.63 | 31.16 | 54.69 | 45.12   | 30.19   | 55.73   | 55.73 |
| linear_aic  | 20.80   | 40.10   |      |      |      | 22.83   | 5.07    |      | 27.37   | 23.70 | 28.64   | -2.63   | 41.15   |      | 17.59 | 26.31 | 23.99 | 12.96   | 10.65   | 13.49   | 13.49 |

|                           |         |         |  |         |         |  |         |       |         |         |         |  |  |  |  |        |       |        |         |         |        |
|---------------------------|---------|---------|--|---------|---------|--|---------|-------|---------|---------|---------|--|--|--|--|--------|-------|--------|---------|---------|--------|
| <b>spline_aic</b>         | -3.13   | 12.52   |  | -2.01   | 10.33   |  | -22.03  | 16.15 | 3.95    | -24.49  | 27.22   |  |  |  |  | -22.05 | 11.15 | -12.70 | -16.16  | -1.54   | -24.24 |
| <b>min_age</b>            | 82.54   |         |  |         | 89.37   |  | 88.43   | 71.70 | 88.05   |         |         |  |  |  |  | 78.09  | 79.59 | 81.66  | 85.42   |         | 80.53  |
| <b>min_value</b>          | 4.78    |         |  |         | 4.32    |  | 2.75    | 4.82  | 3.89    |         |         |  |  |  |  | 5.00   | 5.50  | 5.61   | 5.69    |         | 5.40   |
| <b>amplitude</b>          | 2.72    | 4.68    |  | 4.13    | 2.45    |  | 4.18    | 1.85  | 3.49    | 1.55    | 4.98    |  |  |  |  | 1.79   | 1.83  | 2.14   | 1.51    | 1.68    | 1.76   |
| <b>delta_endpoints</b>    | -1.66   | -4.46   |  | -4.13   | -2.42   |  | -1.93   | -1.21 | -1.38   | -1.55   | -4.98   |  |  |  |  | -0.27  | 0.09  | 1.50   | -0.05   | -1.13   | -1.28  |
| <b>n_minima</b>           | 3.07    | 2.00    |  | 3.00    | 3.00    |  | 5.00    | 1.00  | 4.00    | 3.00    | 3.00    |  |  |  |  | 3.00   | 3.00  | 3.00   | 3.00    | 4.00    | 3.00   |
| <b>n_maxima</b>           | 2.79    | 2.00    |  | 3.00    | 2.00    |  | 4.00    | 1.00  | 3.00    | 3.00    | 3.00    |  |  |  |  | 4.00   | 2.00  | 3.00   | 2.00    | 4.00    | 3.00   |
| <b>turning_points</b>     | 5.86    | 4.00    |  | 6.00    | 5.00    |  | 9.00    | 2.00  | 7.00    | 6.00    | 6.00    |  |  |  |  | 7.00   | 5.00  | 6.00   | 5.00    | 8.00    | 6.00   |
| <b>r_trough</b>           | 0.92    | 1.00    |  | 1.00    | 0.96    |  | 0.95    | 0.73  | 0.95    | 1.00    | 1.00    |  |  |  |  | 0.81   | 0.83  | 0.86   | 0.91    | 1.00    | 0.85   |
| <b>interior_indicator</b> | False   | 0.00    |  | 0.00    | 0.00    |  | 0.00    | 1.00  | 0.00    | 0.00    | 0.00    |  |  |  |  | 1.00   | 1.00  | 1.00   | 0.00    | 0.00    | 1.00   |
| <b>trough_indicator</b>   | True    | 0.00    |  | 0.00    | 1.00    |  | 1.00    | 1.00  | 1.00    | 0.00    | 0.00    |  |  |  |  | 1.00   | 1.00  | 1.00   | 1.00    | 0.00    | 1.00   |
| <b>U_D_depth</b>          | 0.30    | 0.00    |  | 0.00    | 0.01    |  | 0.54    | 0.34  | 0.60    | 0.00    | 0.00    |  |  |  |  | 0.56   | 0.95  | 0.30   | 0.87    | 0.00    | 0.06   |
| <b>U_I_interiority</b>    | 0.07    | 0.00    |  | 0.00    | 0.00    |  | 0.00    | 0.43  | 0.00    | 0.00    | 0.00    |  |  |  |  | 0.21   | 0.16  | 0.09   | 0.00    | 0.00    | 0.13   |
| <b>U_M_monotonicity</b>   | 0.52    | 0.00    |  | 0.00    | 0.89    |  | 0.81    | 0.88  | 0.80    | 0.00    | 0.00    |  |  |  |  | 0.73   | 0.78  | 0.80   | 0.90    | 0.00    | 0.69   |
| <b>U_C_convexity</b>      | 0.58    | 0.00    |  | 0.55    | 1.00    |  | 0.68    | 1.00  | 0.67    | 0.00    | 0.00    |  |  |  |  | 0.95   | 1.00  | 0.80   | 0.71    | 0.08    | 0.65   |
| <b>U_S_symmetry</b>       | 0.39    | 0.00    |  | 0.00    | 0.02    |  | 0.70    | 0.51  | 0.75    | 0.00    | 0.00    |  |  |  |  | 0.88   | 0.97  | 0.46   | 0.98    | 0.00    | 0.13   |
| <b>J_R_rise</b>           | 0.05    | 0.00    |  | 0.00    | 0.00    |  | 0.00    | 0.00  | 0.00    | 0.00    | 0.00    |  |  |  |  | 0.00   | 0.05  | 0.70   | 0.00    | 0.00    | 0.00   |
| <b>J_M_monotonicity</b>   | 0.35    | 0.33    |  | 0.27    | 0.24    |  | 0.38    | 0.21  | 0.40    | 0.41    | 0.25    |  |  |  |  | 0.42   | 0.50  | 0.45   | 0.27    | 0.44    | 0.37   |
| <b>J_C_rightconvex</b>    | 0.55    | 0.34    |  | 0.41    | 0.90    |  | 0.52    | 0.45  | 0.54    | 0.29    | 0.45    |  |  |  |  | 0.61   | 1.00  | 0.72   | 0.53    | 0.43    | 0.51   |
| <b>P_turning</b>          | 0.07    | 0.12    |  | 0.03    | 0.06    |  | 0.00    | 0.50  | 0.01    | 0.03    | 0.03    |  |  |  |  | 0.01   | 0.06  | 0.03   | 0.06    | 0.01    | 0.03   |
| <b>final_structure</b>    | neither | neither |  | neither | neither |  | neither | U     | neither | neither | neither |  |  |  |  | U      | U     | U      | neither | neither | U      |
| <b>U_supported</b>        | False   | 0.00    |  | 0.00    | 0.00    |  | 0.00    | 1.00  | 0.00    | 0.00    | 0.00    |  |  |  |  | 1.00   | 1.00  | 1.00   | 0.00    | 0.00    | 1.00   |
| <b>J_supported</b>        | False   | 0.00    |  | 0.00    | 0.00    |  | 0.00    | 0.00  | 0.00    | 0.00    | 0.00    |  |  |  |  | 0.00   | 0.00  | 0.00   | 0.00    | 0.00    | 0.00   |

Table S6j. Portugal Cantril U-shape ratings, 2006-2024

| KPI                       | Mean    | 2005 | 2006 | 2007 | 2008  | 2009 | 2010    | 2011    | 2012    | 2013  | 2014    | 2015 | 2016    | 2017 | 2018 | 2019  | 2020  | 2021    | 2022  | 2023 | 2024    |
|---------------------------|---------|------|------|------|-------|------|---------|---------|---------|-------|---------|------|---------|------|------|-------|-------|---------|-------|------|---------|
| <b>shape_class</b>        | neither |      |      |      | U     |      | neither | neither | neither | U     | neither |      | neither |      |      | U     | U     | neither | U     |      | neither |
| <b>U_beauty</b>           | 0.02    |      |      |      | 0.07  |      | 0.00    | 0.00    | 0.00    | 0.02  | 0.00    |      | 0.00    |      |      | 0.04  | 0.03  | 0.00    | 0.09  |      | 0.00    |
| <b>J_beauty</b>           | 0.00    |      |      |      | 0.00  |      | 0.00    | 0.00    | 0.00    | 0.00  | 0.00    |      | 0.00    |      |      | 0.00  | 0.01  | 0.00    | 0.01  |      | 0.00    |
| <b>Dominance</b>          | 0.55    |      |      |      | 1.00  |      |         |         | -1.00   | 1.00  |         |      |         |      |      | 0.98  | 0.47  |         | 0.89  |      |         |
| <b>best_df</b>            | 4.25    |      |      |      | 5.00  |      | 4.00    | 3.00    | 5.00    | 5.00  | 5.00    |      | 3.00    |      |      | 5.00  | 4.00  | 4.00    | 4.00  |      | 4.00    |
| <b>p_value</b>            | 0.00    |      |      |      | 0.00  |      | 0.00    | 0.00    | 0.00    | 0.00  | 0.00    |      | 0.01    |      |      | 0.00  | 0.00  | 0.00    | 0.00  |      | 0.00    |
| <b>lr_stat</b>            | 46.05   |      |      |      | 53.97 |      | 27.19   | 31.20   | 60.18   | 44.72 | 93.82   |      | 18.41   |      |      | 52.47 | 65.16 | 30.67   | 44.64 |      | 30.20   |
| <b>linear_aic</b>         | 31.02   |      |      |      | 26.40 |      | 2.88    | 23.10   | 56.19   | 18.48 | 45.00   |      | 25.63   |      |      | 30.38 | 51.95 | 29.06   | 40.47 |      | 22.76   |
| <b>spline_aic</b>         | 1.47    |      |      |      | -9.58 |      | -8.31   | 5.90    | 14.00   | -8.24 | -30.81  |      | 21.21   |      |      | -4.09 | 2.79  | 14.39   | 11.83 |      | 8.56    |
| <b>min_age</b>            | 81.61   |      |      |      | 81.47 |      |         | 87.68   | 86.55   | 73.58 |         |      |         |      |      | 80.16 | 80.72 |         | 76.40 |      | 86.36   |
| <b>min_value</b>          | 4.57    |      |      |      | 4.59  |      |         | 3.76    | 3.24    | 4.57  |         |      |         |      |      | 4.92  | 5.20  |         | 5.38  |      | 4.87    |
| <b>amplitude</b>          | 3.70    |      |      |      | 2.23  |      | 3.56    | 3.54    | 5.76    | 2.21  | 6.77    |      | 3.61    |      |      | 2.93  | 4.79  | 3.43    | 3.13  |      | 2.41    |
| <b>delta_endpoints</b>    | -1.31   |      |      |      | -0.31 |      | -3.56   | -2.62   | 2.30    | -1.78 | -6.77   |      | -3.61   |      |      | 0.45  | 2.99  | -3.43   | 1.47  |      | -0.80   |
| <b>n_minima</b>           | 2.83    |      |      |      | 3.00  |      | 1.00    | 3.00    | 4.00    | 4.00  | 2.00    |      | 2.00    |      |      | 3.00  | 3.00  | 3.00    | 3.00  |      | 3.00    |
| <b>n_maxima</b>           | 2.33    |      |      |      | 2.00  |      | 1.00    | 2.00    | 3.00    | 3.00  | 2.00    |      | 2.00    |      |      | 4.00  | 2.00  | 3.00    | 2.00  |      | 2.00    |
| <b>turning_points</b>     | 5.17    |      |      |      | 5.00  |      | 2.00    | 5.00    | 7.00    | 7.00  | 4.00    |      | 4.00    |      |      | 7.00  | 5.00  | 6.00    | 5.00  |      | 5.00    |
| <b>r_trough</b>           | 0.91    |      |      |      | 0.86  |      | 1.00    | 0.94    | 0.93    | 0.75  | 1.00    |      | 1.00    |      |      | 0.84  | 0.85  | 1.00    | 0.79  |      | 0.92    |
| <b>interior_indicator</b> | False   |      |      |      | 1.00  |      | 0.00    | 0.00    | 0.00    | 1.00  | 0.00    |      | 0.00    |      |      | 1.00  | 1.00  | 0.00    | 1.00  |      | 0.00    |

|                         |         |      |         |         |         |      |         |         |      |      |         |      |         |
|-------------------------|---------|------|---------|---------|---------|------|---------|---------|------|------|---------|------|---------|
| <b>trough_indicator</b> | True    | 1.00 | 0.00    | 1.00    | 1.00    | 1.00 | 0.00    | 0.00    | 1.00 | 1.00 | 0.00    | 1.00 | 1.00    |
| <b>U_D_depth</b>        | 0.34    | 0.86 | 0.00    | 0.26    | 0.60    | 0.19 | 0.00    | 0.00    | 0.55 | 0.38 | 0.00    | 0.53 | 0.67    |
| <b>U_I_interiority</b>  | 0.08    | 0.10 | 0.00    | 0.00    | 0.00    | 0.36 | 0.00    | 0.00    | 0.14 | 0.13 | 0.00    | 0.27 | 0.00    |
| <b>U_M_monotonicity</b> | 0.56    | 0.89 | 0.00    | 0.88    | 0.85    | 0.78 | 0.00    | 0.00    | 0.73 | 0.84 | 0.00    | 0.91 | 0.82    |
| <b>U_C_convexity</b>    | 0.57    | 0.95 | 0.00    | 0.79    | 0.64    | 0.68 | 0.00    | 0.00    | 0.65 | 0.89 | 0.73    | 0.80 | 0.74    |
| <b>U_S_symmetry</b>     | 0.44    | 0.93 | 0.00    | 0.41    | 0.75    | 0.32 | 0.00    | 0.00    | 0.88 | 0.55 | 0.00    | 0.69 | 0.80    |
| <b>J_R_rise</b>         | 0.14    | 0.00 | 0.00    | 0.00    | 0.40    | 0.00 | 0.00    | 0.00    | 0.15 | 0.62 | 0.00    | 0.47 | 0.00    |
| <b>J_M_monotonicity</b> | 0.31    | 0.32 | 0.11    | 0.28    | 0.33    | 0.39 | 0.19    | 0.26    | 0.39 | 0.40 | 0.32    | 0.35 | 0.39    |
| <b>J_C_rightconvex</b>  | 0.55    | 0.92 | 0.42    | 0.50    | 0.56    | 0.63 | 0.11    | 0.42    | 0.51 | 0.91 | 0.34    | 0.73 | 0.52    |
| <b>P_turning</b>        | 0.09    | 0.06 | 0.50    | 0.06    | 0.01    | 0.01 | 0.12    | 0.12    | 0.01 | 0.06 | 0.03    | 0.06 | 0.06    |
| <b>final_structure</b>  | neither | U    | neither | neither | neither | U    | neither | neither | U    | U    | neither | U    | neither |
| <b>U_supported</b>      | False   | 1.00 | 0.00    | 0.00    | 0.00    | 1.00 | 0.00    | 0.00    | 1.00 | 1.00 | 0.00    | 1.00 | 0.00    |
| <b>J_supported</b>      | False   | 0.00 | 0.00    | 0.00    | 0.00    | 0.00 | 0.00    | 0.00    | 0.00 | 0.00 | 0.00    | 0.00 | 0.00    |

Table S6dk. Puerto Rico Cantril U-shape ratings, 2006-2024

| KPI                       | Mean  | 2005 | 2006  | 2007 | 2008 | 2009 | 2010 | 2011 | 2012 | 2013 | 2014  | 2015 | 2016 | 2017 | 2018 | 2019 | 2020 | 2021 | 2022  | 2023 | 2024 |
|---------------------------|-------|------|-------|------|------|------|------|------|------|------|-------|------|------|------|------|------|------|------|-------|------|------|
| <b>shape_class</b>        | U     |      | U     |      |      |      |      |      |      |      | U     |      |      |      |      |      |      |      | U     |      |      |
| <b>U_beauty</b>           | 0.10  |      | 0.04  |      |      |      |      |      |      |      | 0.03  |      |      |      |      |      |      |      | 0.24  |      |      |
| <b>J_beauty</b>           | 0.00  |      | 0.01  |      |      |      |      |      |      |      | 0.00  |      |      |      |      |      |      |      | 0.00  |      |      |
| <b>Dominance</b>          | 0.92  |      | 0.76  |      |      |      |      |      |      |      | 1.00  |      |      |      |      |      |      |      | 1.00  |      |      |
| <b>best_df</b>            | 4.00  |      | 3.00  |      |      |      |      |      |      |      | 5.00  |      |      |      |      |      |      |      | 4.00  |      |      |
| <b>p_value</b>            | 0.04  |      | 0.00  |      |      |      |      |      |      |      | 0.11  |      |      |      |      |      |      |      | 0.01  |      |      |
| <b>lr_stat</b>            | 20.22 |      | 26.55 |      |      |      |      |      |      |      | 14.51 |      |      |      |      |      |      |      | 19.60 |      |      |
| <b>linear_aic</b>         | 28.03 |      | 25.10 |      |      |      |      |      |      |      | 27.55 |      |      |      |      |      |      |      | 31.43 |      |      |
| <b>spline_aic</b>         | 23.81 |      | 12.55 |      |      |      |      |      |      |      | 31.03 |      |      |      |      |      |      |      | 27.84 |      |      |
| <b>min_age</b>            | 58.17 |      | 32.23 |      |      |      |      |      |      |      | 81.66 |      |      |      |      |      |      |      | 60.61 |      |      |
| <b>min_value</b>          | 6.04  |      | 6.05  |      |      |      |      |      |      |      | 5.61  |      |      |      |      |      |      |      | 6.48  |      |      |
| <b>amplitude</b>          | 2.04  |      | 1.95  |      |      |      |      |      |      |      | 1.98  |      |      |      |      |      |      |      | 2.20  |      |      |
| <b>delta_endpoints</b>    | 0.03  |      | 1.14  |      |      |      |      |      |      |      | -0.25 |      |      |      |      |      |      |      | -0.80 |      |      |
| <b>n_minima</b>           | 3.67  |      | 3.00  |      |      |      |      |      |      |      | 4.00  |      |      |      |      |      |      |      | 4.00  |      |      |
| <b>n_maxima</b>           | 3.67  |      | 3.00  |      |      |      |      |      |      |      | 5.00  |      |      |      |      |      |      |      | 3.00  |      |      |
| <b>turning_points</b>     | 7.33  |      | 6.00  |      |      |      |      |      |      |      | 9.00  |      |      |      |      |      |      |      | 7.00  |      |      |
| <b>r_trough</b>           | 0.55  |      | 0.20  |      |      |      |      |      |      |      | 0.86  |      |      |      |      |      |      |      | 0.58  |      |      |
| <b>interior_indicator</b> | True  |      | 1.00  |      |      |      |      |      |      |      | 1.00  |      |      |      |      |      |      |      | 1.00  |      |      |
| <b>trough_indicator</b>   | True  |      | 1.00  |      |      |      |      |      |      |      | 1.00  |      |      |      |      |      |      |      | 1.00  |      |      |
| <b>U_D_depth</b>          | 0.59  |      | 0.41  |      |      |      |      |      |      |      | 0.71  |      |      |      |      |      |      |      | 0.64  |      |      |
| <b>U_I_interiority</b>    | 0.38  |      | 0.26  |      |      |      |      |      |      |      | 0.09  |      |      |      |      |      |      |      | 0.80  |      |      |
| <b>U_M_monotonicity</b>   | 0.69  |      | 0.67  |      |      |      |      |      |      |      | 0.68  |      |      |      |      |      |      |      | 0.71  |      |      |
| <b>U_C_convexity</b>      | 0.76  |      | 0.84  |      |      |      |      |      |      |      | 0.63  |      |      |      |      |      |      |      | 0.81  |      |      |
| <b>U_S_symmetry</b>       | 0.76  |      | 0.59  |      |      |      |      |      |      |      | 0.92  |      |      |      |      |      |      |      | 0.78  |      |      |
| <b>J_R_rise</b>           | 0.20  |      | 0.59  |      |      |      |      |      |      |      | 0.00  |      |      |      |      |      |      |      | 0.00  |      |      |
| <b>J_M_monotonicity</b>   | 0.51  |      | 0.51  |      |      |      |      |      |      |      | 0.49  |      |      |      |      |      |      |      | 0.53  |      |      |
| <b>J_C_rightconvex</b>    | 0.55  |      | 0.66  |      |      |      |      |      |      |      | 0.50  |      |      |      |      |      |      |      | 0.49  |      |      |
| <b>P_turning</b>          | 0.02  |      | 0.03  |      |      |      |      |      |      |      | 0.00  |      |      |      |      |      |      |      | 0.01  |      |      |

|                        |       |      |  |      |      |
|------------------------|-------|------|--|------|------|
| <b>final_structure</b> | U     | U    |  | U    | U    |
| <b>U_supported</b>     | True  | 1.00 |  | 1.00 | 1.00 |
| <b>J_supported</b>     | False | 0.00 |  | 0.00 | 0.00 |

Table S6dl. Romania Cantril U-shape ratings, 2006-2024

| KPI                       | Mean    | 2005   | 2006 | 2007 | 2008 | 2009 | 2010 | 2011    | 2012  | 2013    | 2014    | 2015  | 2016    | 2017    | 2018  | 2019    | 2020 | 2021    | 2022    | 2023  | 2024    |
|---------------------------|---------|--------|------|------|------|------|------|---------|-------|---------|---------|-------|---------|---------|-------|---------|------|---------|---------|-------|---------|
| <b>shape_class</b>        | neither | U      |      |      |      |      |      | neither | U     | neither | neither | U     | neither | neither | U     | neither |      | neither | neither | U     | neither |
| <b>U_beauty</b>           | 0.08    | 0.34   |      |      |      |      |      | 0.00    | 0.03  | 0.00    | 0.00    | 0.38  | 0.00    | 0.00    | 0.25  | 0.00    |      | 0.00    | 0.00    | 0.14  | 0.00    |
| <b>J_beauty</b>           | 0.00    | 0.01   |      |      |      |      |      | 0.00    | 0.00  | 0.00    | 0.00    | 0.00  | 0.00    | 0.00    | 0.01  | 0.00    |      | 0.00    | 0.00    | 0.00  | 0.00    |
| <b>Dominance</b>          | 0.97    | 0.96   |      |      |      |      |      |         | 1.00  |         |         | 1.00  |         |         | 0.89  |         |      |         |         | 1.00  |         |
| <b>best_df</b>            | 4.57    | 5.00   |      |      |      |      |      | 5.00    | 3.00  | 5.00    | 5.00    | 4.00  | 5.00    | 4.00    | 5.00  | 5.00    |      | 5.00    | 5.00    | 5.00  | 3.00    |
| <b>p_value</b>            | 0.00    | 0.00   |      |      |      |      |      | 0.00    | 0.00  | 0.00    | 0.00    | 0.00  | 0.00    | 0.00    | 0.00  | 0.00    |      | 0.00    | 0.00    | 0.00  | 0.00    |
| <b>lr_stat</b>            | 47.56   | 78.68  |      |      |      |      |      | 62.34   | 29.57 | 42.90   | 49.36   | 32.92 | 28.90   | 50.09   | 70.95 | 41.93   |      | 63.01   | 48.31   | 36.78 | 30.11   |
| <b>linear_aic</b>         | 28.03   | 47.98  |      |      |      |      |      | 35.41   | 29.82 | 30.38   | 24.18   | 25.75 | 14.95   | 16.62   | 46.67 | 32.73   |      | 19.32   | 33.13   | 23.52 | 11.93   |
| <b>spline_aic</b>         | -2.39   | -12.70 |      |      |      |      |      | -8.93   | 14.25 | 5.48    | -7.18   | 8.83  | 4.05    | -17.46  | -6.29 | 8.80    |      | -25.70  | 2.82    | 4.74  | -4.18   |
| <b>min_age</b>            | 78.32   | 62.68  |      |      |      |      |      | 87.11   | 82.04 | 87.86   | 87.68   | 58.54 | 88.99   |         | 66.62 |         |      |         | 86.74   | 74.89 |         |
| <b>min_value</b>          | 4.48    | 4.20   |      |      |      |      |      | 3.85    | 4.34  | 3.12    | 3.81    | 5.05  | 4.48    |         | 5.36  |         |      |         | 5.11    | 5.43  |         |
| <b>amplitude</b>          | 3.05    | 3.80   |      |      |      |      |      | 3.22    | 2.59  | 3.56    | 3.59    | 1.87  | 2.90    | 3.10    | 3.64  | 3.34    |      | 2.75    | 2.61    | 2.11  | 3.62    |
| <b>delta_endpoints</b>    | -1.37   | 0.93   |      |      |      |      |      | -1.08   | -0.98 | -1.59   | -1.79   | -0.43 | -2.54   | -3.04   | 1.53  | -3.34   |      | -2.61   | -0.23   | -0.46 | -3.62   |
| <b>n_minima</b>           | 3.00    | 2.00   |      |      |      |      |      | 4.00    | 3.00  | 4.00    | 4.00    | 3.00  | 2.00    | 3.00    | 2.00  | 4.00    |      | 2.00    | 3.00    | 3.00  | 3.00    |
| <b>n_maxima</b>           | 2.79    | 1.00   |      |      |      |      |      | 3.00    | 3.00  | 4.00    | 4.00    | 2.00  | 1.00    | 4.00    | 2.00  | 4.00    |      | 3.00    | 2.00    | 3.00  | 3.00    |
| <b>turning_points</b>     | 5.79    | 3.00   |      |      |      |      |      | 7.00    | 6.00  | 8.00    | 8.00    | 5.00  | 3.00    | 7.00    | 4.00  | 8.00    |      | 5.00    | 5.00    | 6.00  | 6.00    |
| <b>r_trough</b>           | 0.87    | 0.61   |      |      |      |      |      | 0.93    | 0.87  | 0.94    | 0.94    | 0.55  | 0.96    | 1.00    | 0.66  | 1.00    |      | 1.00    | 0.93    | 0.77  | 1.00    |
| <b>interior_indicator</b> | False   | 1.00   |      |      |      |      |      | 0.00    | 1.00  | 0.00    | 0.00    | 1.00  | 0.00    | 0.00    | 1.00  | 0.00    |      | 0.00    | 0.00    | 1.00  | 0.00    |
| <b>trough_indicator</b>   | True    | 1.00   |      |      |      |      |      | 1.00    | 1.00  | 1.00    | 1.00    | 1.00  | 1.00    | 0.00    | 1.00  | 0.00    |      | 0.00    | 1.00    | 1.00  | 0.00    |
| <b>U_D_depth</b>          | 0.43    | 0.75   |      |      |      |      |      | 0.67    | 0.55  | 0.53    | 0.45    | 0.77  | 0.12    | 0.00    | 0.58  | 0.00    |      | 0.00    | 0.91    | 0.75  | 0.00    |
| <b>U_I_interiority</b>    | 0.19    | 0.73   |      |      |      |      |      | 0.00    | 0.08  | 0.00    | 0.00    | 0.87  | 0.00    | 0.00    | 0.60  | 0.00    |      | 0.00    | 0.00    | 0.32  | 0.00    |
| <b>U_M_monotonicity</b>   | 0.60    | 0.83   |      |      |      |      |      | 0.82    | 0.86  | 0.83    | 0.84    | 0.74  | 0.92    | 0.00    | 0.93  | 0.00    |      | 0.00    | 0.87    | 0.82  | 0.00    |
| <b>U_C_convexity</b>      | 0.59    | 0.81   |      |      |      |      |      | 0.65    | 1.00  | 0.66    | 0.67    | 0.92  | 0.71    | 0.00    | 0.89  | 0.00    |      | 0.00    | 0.65    | 0.73  | 0.55    |
| <b>U_S_symmetry</b>       | 0.53    | 0.86   |      |      |      |      |      | 0.80    | 0.74  | 0.70    | 0.64    | 0.87  | 0.22    | 0.00    | 0.73  | 0.00    |      | 0.00    | 0.95    | 0.87  | 0.00    |
| <b>J_R_rise</b>           | 0.05    | 0.25   |      |      |      |      |      | 0.00    | 0.00  | 0.00    | 0.00    | 0.00  | 0.00    | 0.00    | 0.42  | 0.00    |      | 0.00    | 0.00    | 0.00  | 0.00    |
| <b>J_M_monotonicity</b>   | 0.34    | 0.27   |      |      |      |      |      | 0.38    | 0.36  | 0.36    | 0.33    | 0.42  | 0.19    | 0.38    | 0.43  | 0.41    |      | 0.27    | 0.31    | 0.49  | 0.21    |
| <b>J_C_rightconvex</b>    | 0.61    | 0.77   |      |      |      |      |      | 0.55    | 0.95  | 0.55    | 0.56    | 0.85  | 0.51    | 0.47    | 0.94  | 0.47    |      | 0.39    | 0.51    | 0.77  | 0.22    |
| <b>P_turning</b>          | 0.07    | 0.25   |      |      |      |      |      | 0.01    | 0.03  | 0.01    | 0.01    | 0.06  | 0.25    | 0.01    | 0.12  | 0.01    |      | 0.06    | 0.06    | 0.03  | 0.03    |
| <b>final_structure</b>    | neither | U      |      |      |      |      |      | neither | U     | neither | neither | U     | neither | neither | U     | neither |      | neither | neither | U     | neither |
| <b>U_supported</b>        | False   | 1.00   |      |      |      |      |      | 0.00    | 1.00  | 0.00    | 0.00    | 1.00  | 0.00    | 0.00    | 1.00  | 0.00    |      | 0.00    | 0.00    | 1.00  | 0.00    |
| <b>J_supported</b>        | False   | 0.00   |      |      |      |      |      | 0.00    | 0.00  | 0.00    | 0.00    | 0.00  | 0.00    | 0.00    | 0.00  | 0.00    |      | 0.00    | 0.00    | 0.00  | 0.00    |

Table S6dm. Russia Cantril U-shape ratings, 2006-2024

| KPI | Mean | 2005 | 2006 | 2007 | 2008 | 2009 | 2010 | 2011 | 2012 | 2013 | 2014 | 2015 | 2016 | 2017 | 2018 | 2019 | 2020 | 2021 | 2022 | 2023 | 2024 |
|-----|------|------|------|------|------|------|------|------|------|------|------|------|------|------|------|------|------|------|------|------|------|
|-----|------|------|------|------|------|------|------|------|------|------|------|------|------|------|------|------|------|------|------|------|------|

|                           |         |         |         |         |         |         |         |         |         |         |        |         |       |       |         |         |         |
|---------------------------|---------|---------|---------|---------|---------|---------|---------|---------|---------|---------|--------|---------|-------|-------|---------|---------|---------|
| <b>shape_class</b>        | neither | U      | neither | U     | U     | neither | neither | neither |
| <b>U_beauty</b>           | 0.02    | 0.00    | 0.00    | 0.00    | 0.00    | 0.00    | 0.00    | 0.00    | 0.00    | 0.00    | 0.21   | 0.00    | 0.00  | 0.09  | 0.00    | 0.00    | 0.02    |
| <b>J_beauty</b>           | 0.00    | 0.00    | 0.00    | 0.00    | 0.00    | 0.00    | 0.00    | 0.00    | 0.00    | 0.00    | 0.01   | 0.00    | 0.00  | 0.00  | 0.00    | 0.00    | 0.00    |
| <b>Dominance</b>          | 0.97    |         |         |         |         |         |         |         |         |         | 0.95   | 1.00    | 0.96  |       |         | 0.97    |         |
| <b>best_df</b>            | 3.87    | 3.00    | 5.00    | 4.00    | 5.00    | 3.00    | 3.00    | 4.00    | 4.00    | 3.00    | 5.00   | 4.00    | 5.00  | 3.00  | 4.00    | 3.00    | 3.87    |
| <b>p_value</b>            | 0.00    | 0.02    | 0.00    | 0.00    | 0.00    | 0.00    | 0.00    | 0.00    | 0.00    | 0.00    | 0.00   | 0.00    | 0.00  | 0.00  | 0.00    | 0.01    | 0.00    |
| <b>lr_stat</b>            | 44.87   | 16.25   | 33.87   | 67.14   | 62.42   | 36.97   | 45.54   | 32.74   | 36.10   | 65.19   | 67.06  | 63.34   | 50.27 | 45.90 | 31.43   | 18.90   | 44.87   |
| <b>linear_aic</b>         | 19.98   | 6.81    | 35.03   | 47.77   | -10.18  | 15.44   | 29.44   | 17.43   | 23.28   | 15.90   | 38.52  | 6.43    | 26.85 | 25.11 | 22.06   | -0.20   | 19.98   |
| <b>spline_aic</b>         | -9.16   | 4.56    | 19.16   | -3.37   | -54.60  | -7.52   | -2.10   | 0.69    | 3.18    | -35.29  | -10.54 | -40.91  | -5.42 | -6.79 | 6.63    | -5.10   | -9.16   |
| <b>min_age</b>            | 82.95   |         | 88.24   |         |         |         |         |         |         |         | 76.02  | 85.98   | 80.16 | 80.72 |         | 86.55   | 82.95   |
| <b>min_value</b>          | 4.33    |         | 1.91    |         |         |         |         |         |         |         | 4.79   | 4.85    | 4.14  | 4.83  |         | 5.46    | 4.33    |
| <b>amplitude</b>          | 2.98    | 2.10    | 4.51    | 6.38    | 2.21    | 4.00    | 4.71    | 3.17    | 3.74    | 2.16    | 2.71   | 1.40    | 2.55  | 1.76  | 2.15    | 1.16    | 2.98    |
| <b>delta_endpoints</b>    | -2.26   | -2.10   | -1.44   | -6.38   | -2.21   | -4.00   | -4.71   | -3.12   | -3.74   | -2.16   | 0.40   | -0.58   | -1.39 | 0.25  | -2.11   | -0.60   | -2.26   |
| <b>n_minima</b>           | 1.87    | 2.00    | 2.00    | 1.00    | 1.00    | 1.00    | 1.00    | 2.00    | 1.00    | 2.00    | 2.00   | 2.00    | 3.00  | 3.00  | 3.00    | 2.00    | 1.87    |
| <b>n_maxima</b>           | 1.73    | 2.00    | 1.00    | 1.00    | 1.00    | 1.00    | 1.00    | 3.00    | 1.00    | 2.00    | 1.00   | 1.00    | 4.00  | 2.00  | 4.00    | 1.00    | 1.73    |
| <b>turning_points</b>     | 3.60    | 4.00    | 3.00    | 2.00    | 2.00    | 2.00    | 2.00    | 5.00    | 2.00    | 4.00    | 3.00   | 3.00    | 7.00  | 5.00  | 7.00    | 3.00    | 3.60    |
| <b>r_trough</b>           | 0.95    | 1.00    | 0.95    | 1.00    | 1.00    | 1.00    | 1.00    | 1.00    | 1.00    | 1.00    | 0.79   | 0.92    | 0.84  | 0.85  | 1.00    | 0.93    | 0.95    |
| <b>interior_indicator</b> | False   | 0.00    | 0.00    | 0.00    | 0.00    | 0.00    | 0.00    | 0.00    | 0.00    | 0.00    | 1.00   | 0.00    | 1.00  | 1.00  | 0.00    | 0.00    | False   |
| <b>trough_indicator</b>   | False   | 0.00    | 1.00    | 0.00    | 0.00    | 0.00    | 0.00    | 0.00    | 0.00    | 0.00    | 1.00   | 1.00    | 1.00  | 1.00  | 0.00    | 1.00    | False   |
| <b>U_D_depth</b>          | 0.24    | 0.00    | 0.68    | 0.00    | 0.00    | 0.00    | 0.00    | 0.00    | 0.00    | 0.00    | 0.85   | 0.58    | 0.11  | 0.86  | 0.00    | 0.48    | 0.24    |
| <b>U_I_interiority</b>    | 0.04    | 0.00    | 0.00    | 0.00    | 0.00    | 0.00    | 0.00    | 0.00    | 0.00    | 0.00    | 0.28   | 0.00    | 0.14  | 0.13  | 0.00    | 0.00    | 0.04    |
| <b>U_M_monotonicity</b>   | 0.35    | 0.00    | 0.94    | 0.00    | 0.00    | 0.00    | 0.00    | 0.00    | 0.00    | 0.00    | 0.95   | 0.91    | 0.72  | 0.89  | 0.00    | 0.91    | 0.35    |
| <b>U_C_convexity</b>      | 0.32    | 0.00    | 0.68    | 0.00    | 0.00    | 0.00    | 0.00    | 0.00    | 0.00    | 0.00    | 1.00   | 0.69    | 0.59  | 1.00  | 0.00    | 0.77    | 0.32    |
| <b>U_S_symmetry</b>       | 0.29    | 0.00    | 0.81    | 0.00    | 0.00    | 0.00    | 0.00    | 0.00    | 0.00    | 0.00    | 0.92   | 0.74    | 0.28  | 0.92  | 0.00    | 0.65    | 0.29    |
| <b>J_R_rise</b>           | 0.02    | 0.00    | 0.00    | 0.00    | 0.00    | 0.00    | 0.00    | 0.00    | 0.00    | 0.00    | 0.15   | 0.00    | 0.00  | 0.14  | 0.00    | 0.00    | 0.02    |
| <b>J_M_monotonicity</b>   | 0.22    | 0.21    | 0.16    | 0.15    | 0.14    | 0.11    | 0.15    | 0.24    | 0.02    | 0.26    | 0.30   | 0.24    | 0.33  | 0.33  | 0.39    | 0.24    | 0.22    |
| <b>J_C_rightconvex</b>    | 0.40    | 0.09    | 0.51    | 0.47    | 0.21    | 0.00    | 0.01    | 0.42    | 0.27    | 0.46    | 1.00   | 0.50    | 0.47  | 1.00  | 0.12    | 0.53    | 0.40    |
| <b>P_turning</b>          | 0.26    | 0.12    | 0.25    | 0.50    | 0.50    | 0.50    | 0.50    | 0.06    | 0.50    | 0.12    | 0.25   | 0.25    | 0.01  | 0.06  | 0.01    | 0.25    | 0.26    |
| <b>final_structure</b>    | neither | U      | neither | U     | U     | neither | neither | neither |
| <b>U_supported</b>        | False   | 0.00    | 0.00    | 0.00    | 0.00    | 0.00    | 0.00    | 0.00    | 0.00    | 0.00    | 1.00   | 0.00    | 1.00  | 1.00  | 0.00    | 0.00    | False   |
| <b>J_supported</b>        | False   | 0.00    | 0.00    | 0.00    | 0.00    | 0.00    | 0.00    | 0.00    | 0.00    | 0.00    | 0.00   | 0.00    | 0.00  | 0.00  | 0.00    | 0.00    | False   |

Table S6dn. Rwanda Cantril U-shape ratings, 2006-2024

| KPI                | Mean    | 2005 | 2006    | 2007 | 2008    | 2009 | 2010 | 2011 | 2012 | 2013    | 2014    | 2015 | 2016 | 2017  | 2018 | 2019    | 2020 | 2021 | 2022 | 2023 | 2024 |
|--------------------|---------|------|---------|------|---------|------|------|------|------|---------|---------|------|------|-------|------|---------|------|------|------|------|------|
| <b>shape_class</b> | neither |      | neither |      | neither |      |      |      |      | neither | neither |      |      | U     |      | neither |      |      |      |      |      |
| <b>U_beauty</b>    | 0.01    |      | 0.00    |      | 0.00    |      |      |      |      | 0.00    | 0.00    |      |      | 0.03  |      | 0.00    |      |      |      |      |      |
| <b>J_beauty</b>    | 0.00    |      | 0.00    |      | 0.00    |      |      |      |      | 0.00    | 0.00    |      |      | 0.01  |      | 0.00    |      |      |      |      |      |
| <b>Dominance</b>   | 0.61    |      |         |      |         |      |      |      |      |         |         |      |      | 0.61  |      |         |      |      |      |      |      |
| <b>best_df</b>     | 3.83    |      | 3.00    |      | 4.00    |      |      |      |      | 5.00    | 5.00    |      |      | 3.00  |      | 3.00    |      |      |      |      |      |
| <b>p_value</b>     | 0.03    |      | 0.08    |      | 0.00    |      |      |      |      | 0.00    | 0.00    |      |      | 0.00  |      | 0.08    |      |      |      |      |      |
| <b>lr_stat</b>     | 34.01   |      | 12.78   |      | 54.91   |      |      |      |      | 59.17   | 41.73   |      |      | 22.58 |      | 12.88   |      |      |      |      |      |
| <b>linear_aic</b>  | 31.17   |      | 14.14   |      | 22.41   |      |      |      |      | 42.13   | 38.44   |      |      | 34.59 |      | 35.31   |      |      |      |      |      |
| <b>spline_aic</b>  | 12.83   |      | 15.36   |      | -16.50  |      |      |      |      | 0.97    | 14.71   |      |      | 26.01 |      | 36.44   |      |      |      |      |      |
| <b>min_age</b>     | 87.49   |      |         |      | 87.68   |      |      |      |      |         | 91.06   |      |      | 82.79 |      | 88.43   |      |      |      |      |      |
| <b>min_value</b>   | 1.01    |      |         |      | 1.93    |      |      |      |      |         | -0.12   |      |      | 1.83  |      | 0.40    |      |      |      |      |      |
| <b>amplitude</b>   | 3.35    |      | 2.07    |      | 2.89    |      |      |      |      | 4.04    | 4.17    |      |      | 2.46  |      | 4.44    |      |      |      |      |      |

|                           |         |         |         |         |         |      |         |
|---------------------------|---------|---------|---------|---------|---------|------|---------|
| <b>delta_endpoints</b>    | -2.15   | -1.81   | -0.74   | -3.29   | -3.76   | 0.63 | -3.93   |
| <b>n_minima</b>           | 2.33    | 1.00    | 3.00    | 3.00    | 3.00    | 2.00 | 2.00    |
| <b>n_maxima</b>           | 2.33    | 2.00    | 3.00    | 4.00    | 3.00    | 1.00 | 1.00    |
| <b>turning_points</b>     | 4.67    | 3.00    | 6.00    | 7.00    | 6.00    | 3.00 | 3.00    |
| <b>r_trough</b>           | 0.96    | 1.00    | 0.94    | 1.00    | 0.99    | 0.88 | 0.95    |
| <b>interior_indicator</b> | False   | 0.00    | 0.00    | 0.00    | 0.00    | 1.00 | 0.00    |
| <b>trough_indicator</b>   | True    | 0.00    | 1.00    | 0.00    | 1.00    | 1.00 | 1.00    |
| <b>U_D_depth</b>          | 0.25    | 0.00    | 0.60    | 0.00    | 0.03    | 0.75 | 0.11    |
| <b>U_I_interiority</b>    | 0.01    | 0.00    | 0.00    | 0.00    | 0.00    | 0.06 | 0.00    |
| <b>U_M_monotonicity</b>   | 0.57    | 0.00    | 0.83    | 0.00    | 0.75    | 0.91 | 0.90    |
| <b>U_C_convexity</b>      | 0.73    | 1.00    | 0.75    | 0.00    | 0.73    | 0.97 | 0.90    |
| <b>U_S_symmetry</b>       | 0.32    | 0.00    | 0.83    | 0.00    | 0.06    | 0.85 | 0.21    |
| <b>J_R_rise</b>           | 0.04    | 0.00    | 0.00    | 0.00    | 0.00    | 0.25 | 0.00    |
| <b>J_M_monotonicity</b>   | 0.33    | 0.21    | 0.35    | 0.49    | 0.45    | 0.27 | 0.22    |
| <b>J_C_rightconvex</b>    | 0.54    | 0.45    | 0.47    | 0.46    | 0.47    | 0.87 | 0.53    |
| <b>P_turning</b>          | 0.14    | 0.25    | 0.03    | 0.01    | 0.03    | 0.25 | 0.25    |
| <b>final_structure</b>    | neither | neither | neither | neither | neither | U    | neither |
| <b>U_supported</b>        | False   | 0.00    | 0.00    | 0.00    | 0.00    | 1.00 | 0.00    |
| <b>J_supported</b>        | False   | 0.00    | 0.00    | 0.00    | 0.00    | 0.00 | 0.00    |

Table S6do. Senegal Cantril U-shape ratings, 2006-2024

| KPI                       | Mean  | 2005 | 2006 | 2007 | 2008 | 2009 | 2010   | 2011 | 2012 | 2013    | 2014 | 2015 | 2016 | 2017 | 2018 | 2019    | 2020 | 2021 | 2022 | 2023  | 2024  |
|---------------------------|-------|------|------|------|------|------|--------|------|------|---------|------|------|------|------|------|---------|------|------|------|-------|-------|
| <b>shape_class</b>        | U     |      |      |      |      |      | U      |      |      | neither |      |      |      |      |      | neither |      |      |      | U     | U     |
| <b>U_beauty</b>           | 0.06  |      |      |      |      |      | 0.18   |      |      | 0.00    |      |      |      |      |      | 0.00    |      |      |      | 0.09  | 0.00  |
| <b>J_beauty</b>           | 0.00  |      |      |      |      |      | 0.00   |      |      | 0.00    |      |      |      |      |      | 0.00    |      |      |      | 0.00  | 0.00  |
| <b>Dominance</b>          | 0.18  |      |      |      |      |      | 0.98   |      |      | -1.00   |      |      |      |      |      | -1.00   |      |      |      | 0.94  | 1.00  |
| <b>best_df</b>            | 4.20  |      |      |      |      |      | 5.00   |      |      | 3.00    |      |      |      |      |      | 5.00    |      |      |      | 3.00  | 5.00  |
| <b>p_value</b>            | 0.00  |      |      |      |      |      | 0.00   |      |      | 0.00    |      |      |      |      |      | 0.00    |      |      |      | 0.00  | 0.00  |
| <b>lr_stat</b>            | 35.17 |      |      |      |      |      | 43.86  |      |      | 36.39   |      |      |      |      |      | 38.72   |      |      |      | 31.44 | 25.45 |
| <b>linear_aic</b>         | 27.90 |      |      |      |      |      | 0.19   |      |      | 7.06    |      |      |      |      |      | 64.47   |      |      |      | 43.90 | 23.90 |
| <b>spline_aic</b>         | 9.13  |      |      |      |      |      | -25.67 |      |      | -15.34  |      |      |      |      |      | 43.75   |      |      |      | 26.46 | 16.44 |
| <b>min_age</b>            | 78.47 |      |      |      |      |      | 57.79  |      |      | 86.74   |      |      |      |      |      | 88.05   |      |      |      | 78.28 | 81.47 |
| <b>min_value</b>          | 2.66  |      |      |      |      |      | 4.19   |      |      | 2.96    |      |      |      |      |      | -0.17   |      |      |      | 3.40  | 2.92  |
| <b>amplitude</b>          | 3.15  |      |      |      |      |      | 0.92   |      |      | 1.08    |      |      |      |      |      | 8.14    |      |      |      | 3.61  | 2.00  |
| <b>delta_endpoints</b>    | 0.51  |      |      |      |      |      | 0.42   |      |      | 0.17    |      |      |      |      |      | 2.19    |      |      |      | 1.33  | -1.55 |
| <b>n_minima</b>           | 3.00  |      |      |      |      |      | 3.00   |      |      | 2.00    |      |      |      |      |      | 4.00    |      |      |      | 3.00  | 3.00  |
| <b>n_maxima</b>           | 3.20  |      |      |      |      |      | 4.00   |      |      | 2.00    |      |      |      |      |      | 3.00    |      |      |      | 3.00  | 4.00  |
| <b>turning_points</b>     | 6.20  |      |      |      |      |      | 7.00   |      |      | 4.00    |      |      |      |      |      | 7.00    |      |      |      | 6.00  | 7.00  |
| <b>r_trough</b>           | 0.82  |      |      |      |      |      | 0.54   |      |      | 0.93    |      |      |      |      |      | 0.95    |      |      |      | 0.82  | 0.86  |
| <b>interior_indicator</b> | True  |      |      |      |      |      | 1.00   |      |      | 0.00    |      |      |      |      |      | 0.00    |      |      |      | 1.00  | 1.00  |
| <b>trough_indicator</b>   | True  |      |      |      |      |      | 1.00   |      |      | 1.00    |      |      |      |      |      | 1.00    |      |      |      | 1.00  | 1.00  |
| <b>U_D_depth</b>          | 0.53  |      |      |      |      |      | 0.43   |      |      | 0.80    |      |      |      |      |      | 0.73    |      |      |      | 0.63  | 0.04  |
| <b>U_I_interiority</b>    | 0.24  |      |      |      |      |      | 0.89   |      |      | 0.00    |      |      |      |      |      | 0.00    |      |      |      | 0.21  | 0.10  |
| <b>U_M_monotonicity</b>   | 0.74  |      |      |      |      |      | 0.71   |      |      | 0.77    |      |      |      |      |      | 0.78    |      |      |      | 0.87  | 0.58  |

|                  |       |      |         |         |      |      |
|------------------|-------|------|---------|---------|------|------|
| U_C_convexity    | 0.80  | 1.00 | 0.81    | 0.66    | 0.97 | 0.58 |
| U_S_symmetry     | 0.65  | 0.65 | 0.91    | 0.84    | 0.77 | 0.09 |
| J_R_rise         | 0.25  | 0.45 | 0.16    | 0.27    | 0.37 | 0.00 |
| J_M_monotonicity | 0.46  | 0.53 | 0.44    | 0.43    | 0.39 | 0.54 |
| J_C_rightconvex  | 0.59  | 0.44 | 0.55    | 0.50    | 1.00 | 0.46 |
| P_turning        | 0.04  | 0.01 | 0.12    | 0.01    | 0.03 | 0.01 |
| final_structure  | U     | U    | neither | neither | U    | U    |
| U_supported      | True  | 1.00 | 0.00    | 0.00    | 1.00 | 1.00 |
| J_supported      | False | 0.00 | 0.00    | 0.00    | 0.00 | 0.00 |

Table S6dp. Serbia Cantril U-shape ratings, 2006-2024

| KPI                | Mean    | 2005 | 2006 | 2007 | 2008 | 2009    | 2010 | 2011    | 2012  | 2013 | 2014    | 2015    | 2016    | 2017    | 2018 | 2019  | 2020    | 2021  | 2022    | 2023 | 2024    |
|--------------------|---------|------|------|------|------|---------|------|---------|-------|------|---------|---------|---------|---------|------|-------|---------|-------|---------|------|---------|
| shape_class        | neither |      |      |      |      | neither |      | neither | U     |      | neither | neither | neither | neither |      | U     | neither | U     | neither |      | neither |
| U_beauty           | 0.05    |      |      |      |      | 0.00    |      | 0.00    | 0.03  |      | 0.00    | 0.00    | 0.00    | 0.00    |      | 0.17  | 0.00    | 0.35  | 0.00    |      | 0.00    |
| J_beauty           | 0.00    |      |      |      |      | 0.00    |      | 0.00    | 0.01  |      | 0.00    | 0.00    | 0.00    | 0.00    |      | 0.01  | 0.00    | 0.00  | 0.00    |      | 0.00    |
| Dominance          | 0.39    |      |      |      |      |         |      |         | 0.69  |      |         |         |         |         |      | 0.85  | -1.00   | 1.00  |         |      |         |
| best_df            | 4.50    |      |      |      |      | 5.00    |      | 5.00    | 3.00  |      | 4.00    | 5.00    | 5.00    | 5.00    |      | 5.00  | 5.00    | 3.00  | 4.00    |      | 5.00    |
| p_value            | 0.02    |      |      |      |      | 0.00    |      | 0.00    | 0.00  |      | 0.24    | 0.00    | 0.01    | 0.00    |      | 0.00  | 0.00    | 0.00  | 0.00    |      | 0.00    |
| lr_stat            | 36.07   |      |      |      |      | 54.71   |      | 32.92   | 32.45 |      | 10.43   | 56.70   | 21.18   | 39.45   |      | 53.50 | 51.49   | 29.23 | 22.17   |      | 28.65   |
| linear_aic         | 27.73   |      |      |      |      | 51.31   |      | 22.83   | 43.34 |      | 2.40    | 50.25   | 9.60    | 36.81   |      | 38.71 | 40.67   | 34.06 | -2.20   |      | 5.05    |
| spline_aic         | 8.66    |      |      |      |      | 14.60   |      | 7.90    | 24.89 |      | 7.97    | 11.55   | 6.41    | 15.36   |      | 3.21  | 7.18    | 18.83 | -8.37   |      | -5.60   |
| min_age            | 79.88   |      |      |      |      |         |      |         | 82.79 |      |         |         |         |         |      | 71.51 | 87.11   | 62.30 |         |      | 88.24   |
| min_value          | 4.62    |      |      |      |      |         |      |         | 4.02  |      |         |         |         |         |      | 5.42  | 4.59    | 5.39  |         |      | 5.09    |
| amplitude          | 3.49    |      |      |      |      | 5.45    |      | 2.28    | 3.04  |      | 3.29    | 5.75    | 4.07    | 3.61    |      | 2.58  | 3.41    | 2.20  | 3.24    |      | 2.96    |
| delta_endpoints    | -2.00   |      |      |      |      | -5.27   |      | -2.28   | 0.74  |      | -3.29   | -5.16   | -4.07   | -0.52   |      | 1.21  | 0.71    | -0.38 | -3.24   |      | -2.40   |
| n_minima           | 2.83    |      |      |      |      | 4.00    |      | 4.00    | 2.00  |      | 3.00    | 4.00    | 3.00    | 3.00    |      | 2.00  | 2.00    | 3.00  | 1.00    |      | 3.00    |
| n_maxima           | 2.83    |      |      |      |      | 4.00    |      | 4.00    | 2.00  |      | 3.00    | 4.00    | 3.00    | 3.00    |      | 2.00  | 2.00    | 3.00  | 1.00    |      | 3.00    |
| turning_points     | 5.67    |      |      |      |      | 8.00    |      | 8.00    | 4.00  |      | 6.00    | 8.00    | 6.00    | 6.00    |      | 4.00  | 4.00    | 6.00  | 2.00    |      | 6.00    |
| r_trough           | 0.92    |      |      |      |      | 1.00    |      | 1.00    | 0.88  |      | 1.00    | 1.00    | 1.00    | 0.94    |      | 0.73  | 0.93    | 0.60  | 1.00    |      | 0.95    |
| interior_indicator | False   |      |      |      |      | 0.00    |      | 0.00    | 1.00  |      | 0.00    | 0.00    | 0.00    | 0.00    |      | 1.00  | 0.00    | 1.00  | 0.00    |      | 0.00    |
| trough_indicator   | False   |      |      |      |      | 0.00    |      | 0.00    | 1.00  |      | 0.00    | 0.00    | 0.00    | 1.00    |      | 1.00  | 1.00    | 1.00  | 0.00    |      | 1.00    |
| U_D_depth          | 0.31    |      |      |      |      | 0.00    |      | 0.00    | 0.76  |      | 0.00    | 0.00    | 0.00    | 0.77    |      | 0.53  | 0.79    | 0.74  | 0.00    |      | 0.14    |
| U_I_interiority    | 0.10    |      |      |      |      | 0.00    |      | 0.00    | 0.06  |      | 0.00    | 0.00    | 0.00    | 0.00    |      | 0.43  | 0.00    | 0.74  | 0.00    |      | 0.00    |
| U_M_monotonicity   | 0.43    |      |      |      |      | 0.00    |      | 0.00    | 0.87  |      | 0.00    | 0.00    | 0.00    | 0.86    |      | 0.91  | 0.88    | 0.76  | 0.00    |      | 0.85    |
| U_C_convexity      | 0.43    |      |      |      |      | 0.00    |      | 0.05    | 0.94  |      | 0.00    | 0.00    | 0.00    | 0.63    |      | 1.00  | 0.67    | 1.00  | 0.00    |      | 0.82    |
| U_S_symmetry       | 0.38    |      |      |      |      | 0.00    |      | 0.00    | 0.86  |      | 0.00    | 0.00    | 0.00    | 0.91    |      | 0.69  | 0.88    | 0.90  | 0.00    |      | 0.26    |
| J_R_rise           | 0.08    |      |      |      |      | 0.00    |      | 0.00    | 0.24  |      | 0.00    | 0.00    | 0.00    | 0.00    |      | 0.47  | 0.21    | 0.00  | 0.00    |      | 0.00    |
| J_M_monotonicity   | 0.32    |      |      |      |      | 0.44    |      | 0.43    | 0.34  |      | 0.18    | 0.38    | 0.25    | 0.31    |      | 0.40  | 0.28    | 0.40  | 0.10    |      | 0.32    |
| J_C_rightconvex    | 0.55    |      |      |      |      | 0.48    |      | 0.44    | 0.84  |      | 0.43    | 0.45    | 0.53    | 0.59    |      | 0.87  | 0.44    | 0.47  | 0.55    |      | 0.49    |
| P_turning          | 0.09    |      |      |      |      | 0.01    |      | 0.01    | 0.12  |      | 0.03    | 0.01    | 0.03    | 0.03    |      | 0.12  | 0.12    | 0.03  | 0.50    |      | 0.03    |
| final_structure    | neither |      |      |      |      | neither |      | neither | U     |      | neither | neither | neither | neither |      | U     | neither | U     | neither |      | neither |
| U_supported        | False   |      |      |      |      | 0.00    |      | 0.00    | 1.00  |      | 0.00    | 0.00    | 0.00    | 0.00    |      | 1.00  | 0.00    | 1.00  | 0.00    |      | 0.00    |
| J_supported        | False   |      |      |      |      | 0.00    |      | 0.00    | 0.00  |      | 0.00    | 0.00    | 0.00    | 0.00    |      | 0.00  | 0.00    | 0.00  | 0.00    |      | 0.00    |

Table S6dq. Sierra Leone Cantril U-shape ratings, 2006-2024

| KPI                | Mean  | 2005 | 2006 | 2007 | 2008 | 2009 | 2010  | 2011    | 2012 | 2013 | 2014    | 2015  | 2016  | 2017    | 2018  | 2019  | 2020 | 2021 | 2022    | 2023  | 2024    |
|--------------------|-------|------|------|------|------|------|-------|---------|------|------|---------|-------|-------|---------|-------|-------|------|------|---------|-------|---------|
| shape_class        | U     |      |      |      |      |      | U     | neither |      |      | neither | U     | U     | neither | U     | U     |      |      | neither | U     | neither |
| U_beauty           | 0.02  |      |      |      |      |      | 0.02  | 0.00    |      |      | 0.00    | 0.11  | 0.05  | 0.00    | 0.00  | 0.07  |      |      | 0.00    | 0.01  | 0.00    |
| J_beauty           | 0.00  |      |      |      |      |      | 0.03  | 0.00    |      |      | 0.00    | 0.00  | 0.00  | 0.00    | 0.00  | 0.00  |      |      | 0.00    | 0.00  | 0.00    |
| Dominance          | 0.60  |      |      |      |      |      | -0.15 |         |      |      | 0.99    | 1.00  | 1.00  | 0.07    | 0.92  |       |      |      |         | 0.80  |         |
| best_df            | 3.91  |      |      |      |      |      | 3.00  | 5.00    |      |      | 5.00    | 4.00  | 3.00  | 3.00    | 3.00  | 4.00  |      |      | 3.00    | 5.00  | 5.00    |
| p_value            | 0.06  |      |      |      |      |      | 0.03  | 0.36    |      |      | 0.00    | 0.00  | 0.04  | 0.02    | 0.24  | 0.00  |      |      | 0.00    | 0.00  | 0.01    |
| lr_stat            | 21.86 |      |      |      |      |      | 15.67 | 9.92    |      |      | 26.85   | 28.33 | 14.59 | 17.26   | 9.18  | 37.51 |      |      | 23.43   | 36.50 | 21.21   |
| linear_aic         | 37.40 |      |      |      |      |      | 25.68 | 42.28   |      |      | 30.29   | 45.24 | 38.18 | 22.48   | 47.28 | 32.70 |      |      | 52.06   | 51.81 | 23.35   |
| spline_aic         | 31.36 |      |      |      |      |      | 24.01 | 50.36   |      |      | 21.44   | 32.92 | 37.59 | 19.23   | 52.10 | 11.19 |      |      | 42.63   | 33.31 | 20.14   |
| min_age            | 79.15 |      |      |      |      |      | 80.16 |         |      |      |         | 59.48 | 76.96 |         | 84.29 | 79.03 |      |      | 87.49   | 77.90 | 87.86   |
| min_value          | 2.28  |      |      |      |      |      | 3.86  |         |      |      |         | 3.73  | 3.34  |         | 2.33  | 2.21  |      |      | -0.84   | 2.58  | 1.03    |
| amplitude          | 3.08  |      |      |      |      |      | 1.66  | 2.25    |      |      | 3.04    | 4.25  | 2.40  | 2.04    | 2.68  | 2.53  |      |      | 4.74    | 5.78  | 2.53    |
| delta_endpoints    | -0.15 |      |      |      |      |      | 1.06  | -0.28   |      |      | -2.29   | 0.65  | -0.06 | -1.66   | 0.25  | 0.86  |      |      | -0.56   | 1.53  | -1.09   |
| n_minima           | 2.91  |      |      |      |      |      | 2.00  | 4.00    |      |      | 3.00    | 4.00  | 3.00  | 1.00    | 2.00  | 3.00  |      |      | 3.00    | 3.00  | 4.00    |
| n_maxima           | 3.18  |      |      |      |      |      | 2.00  | 5.00    |      |      | 4.00    | 4.00  | 4.00  | 2.00    | 2.00  | 3.00  |      |      | 2.00    | 4.00  | 3.00    |
| turning_points     | 6.09  |      |      |      |      |      | 4.00  | 9.00    |      |      | 7.00    | 8.00  | 7.00  | 3.00    | 4.00  | 6.00  |      |      | 5.00    | 7.00  | 7.00    |
| r_trough           | 0.88  |      |      |      |      |      | 0.84  | 1.00    |      |      | 1.00    | 0.57  | 0.80  | 1.00    | 0.90  | 0.83  |      |      | 0.94    | 0.81  | 0.94    |
| interior_indicator | True  |      |      |      |      |      | 1.00  | 0.00    |      |      | 0.00    | 1.00  | 1.00  | 0.00    | 1.00  | 1.00  |      |      | 0.00    | 1.00  | 0.00    |
| trough_indicator   | True  |      |      |      |      |      | 1.00  | 0.00    |      |      | 0.00    | 1.00  | 1.00  | 0.00    | 1.00  | 1.00  |      |      | 1.00    | 1.00  | 1.00    |
| U_D_depth          | 0.37  |      |      |      |      |      | 0.36  | 0.00    |      |      | 0.00    | 0.37  | 0.43  | 0.00    | 0.91  | 0.66  |      |      | 0.63    | 0.16  | 0.51    |
| U_I_interiority    | 0.15  |      |      |      |      |      | 0.14  | 0.00    |      |      | 0.00    | 0.83  | 0.25  | 0.00    | 0.01  | 0.18  |      |      | 0.00    | 0.22  | 0.00    |
| U_M_monotonicity   | 0.52  |      |      |      |      |      | 0.73  | 0.00    |      |      | 0.00    | 0.60  | 0.64  | 0.00    | 0.77  | 0.80  |      |      | 0.73    | 0.64  | 0.78    |
| U_C_convexity      | 0.61  |      |      |      |      |      | 1.00  | 0.03    |      |      | 0.15    | 0.73  | 0.80  | 0.00    | 0.84  | 0.95  |      |      | 0.83    | 0.71  | 0.66    |
| U_S_symmetry       | 0.57  |      |      |      |      |      | 0.53  | 0.00    |      |      | 0.00    | 0.83  | 0.97  | 0.00    | 0.95  | 0.80  |      |      | 0.91    | 0.54  | 0.71    |
| J_R_rise           | 0.14  |      |      |      |      |      | 0.64  | 0.00    |      |      | 0.00    | 0.15  | 0.00  | 0.00    | 0.09  | 0.34  |      |      | 0.00    | 0.26  | 0.00    |
| J_M_monotonicity   | 0.48  |      |      |      |      |      | 0.56  | 0.54    |      |      | 0.47    | 0.51  | 0.50  | 0.37    | 0.48  | 0.48  |      |      | 0.50    | 0.52  | 0.42    |
| J_C_rightconvex    | 0.58  |      |      |      |      |      | 1.00  | 0.42    |      |      | 0.45    | 0.52  | 0.51  | 0.44    | 0.68  | 0.69  |      |      | 0.53    | 0.56  | 0.60    |
| P_turning          | 0.06  |      |      |      |      |      | 0.12  | 0.00    |      |      | 0.01    | 0.01  | 0.01  | 0.25    | 0.12  | 0.03  |      |      | 0.06    | 0.01  | 0.01    |
| final_structure    | U     |      |      |      |      |      | U     | neither |      |      | neither | U     | U     | neither | U     | U     |      |      | neither | U     | neither |
| U_supported        | True  |      |      |      |      |      | 1.00  | 0.00    |      |      | 0.00    | 1.00  | 1.00  | 0.00    | 1.00  | 1.00  |      |      | 0.00    | 1.00  | 0.00    |
| J_supported        | False |      |      |      |      |      | 0.00  | 0.00    |      |      | 0.00    | 0.00  | 0.00  | 0.00    | 0.00  | 0.00  |      |      | 0.00    | 0.00  | 0.00    |

Table S6dr. Singapore Cantril U-shape ratings, 2006-2024

| KPI         | Mean | 2005 | 2006 | 2007 | 2008 | 2009 | 2010 | 2011 | 2012 | 2013 | 2014 | 2015    | 2016    | 2017 | 2018 | 2019  | 2020 | 2021    | 2022 | 2023 | 2024 |
|-------------|------|------|------|------|------|------|------|------|------|------|------|---------|---------|------|------|-------|------|---------|------|------|------|
| shape_class | U    |      |      |      |      |      |      |      |      | U    | U    | neither | neither | U    |      | J     |      | neither | U    |      |      |
| U_beauty    | 0.02 |      |      |      |      |      |      |      |      | 0.06 | 0.06 | 0.00    | 0.00    | 0.03 |      | 0.00  |      | 0.00    | 0.02 |      |      |
| J_beauty    | 0.00 |      |      |      |      |      |      |      |      | 0.00 | 0.00 | 0.00    | 0.00    | 0.00 |      | 0.02  |      | 0.00    | 0.00 |      |      |
| Dominance   | 0.20 |      |      |      |      |      |      |      |      | 1.00 | 1.00 |         |         | 1.00 |      | -1.00 |      | -1.00   | 0.20 |      |      |
| best_df     | 4.29 |      |      |      |      |      |      |      |      | 5.00 | 4.00 | 5.00    | 5.00    | 3.00 |      | 3.00  |      | 5.00    | 4.29 |      |      |
| p_value     | 0.02 |      |      |      |      |      |      |      |      | 0.05 | 0.00 | 0.00    | 0.00    | 0.04 |      | 0.03  |      | 0.01    | 0.02 |      |      |

|                           |       |  |  |  |  |  |  |  |  |       |       |         |         |       |  |       |  |         |       |
|---------------------------|-------|--|--|--|--|--|--|--|--|-------|-------|---------|---------|-------|--|-------|--|---------|-------|
| <b>lr_stat</b>            | 22.84 |  |  |  |  |  |  |  |  | 17.08 | 24.04 | 33.55   | 31.69   | 14.54 |  | 15.85 |  | 23.16   | 22.84 |
| <b>linear_aic</b>         | 18.58 |  |  |  |  |  |  |  |  | 16.02 | 13.97 | 18.41   | 2.67    | 15.62 |  | 28.66 |  | 34.72   | 18.58 |
| <b>spline_aic</b>         | 12.31 |  |  |  |  |  |  |  |  | 16.95 | 5.93  | 2.86    | -11.03  | 15.08 |  | 26.82 |  | 29.55   | 12.31 |
| <b>min_age</b>            | 81.14 |  |  |  |  |  |  |  |  | 81.10 | 72.08 |         |         | 77.53 |  | 88.43 |  | 86.55   | 81.14 |
| <b>min_value</b>          | 5.93  |  |  |  |  |  |  |  |  | 5.80  | 6.63  |         |         | 5.63  |  | 5.41  |  | 6.17    | 5.93  |
| <b>amplitude</b>          | 1.57  |  |  |  |  |  |  |  |  | 1.30  | 1.26  | 1.80    | 0.99    | 1.10  |  | 1.69  |  | 2.82    | 1.57  |
| <b>delta_endpoints</b>    | 0.11  |  |  |  |  |  |  |  |  | -0.06 | -0.48 | -0.63   | -0.61   | -0.25 |  | 0.58  |  | 2.24    | 0.11  |
| <b>n_minima</b>           | 3.00  |  |  |  |  |  |  |  |  | 3.00  | 3.00  | 3.00    | 3.00    | 3.00  |  | 2.00  |  | 4.00    | 3.00  |
| <b>n_maxima</b>           | 3.14  |  |  |  |  |  |  |  |  | 3.00  | 3.00  | 4.00    | 4.00    | 3.00  |  | 2.00  |  | 3.00    | 3.14  |
| <b>turning_points</b>     | 6.14  |  |  |  |  |  |  |  |  | 6.00  | 6.00  | 7.00    | 7.00    | 6.00  |  | 4.00  |  | 7.00    | 6.14  |
| <b>r_trough</b>           | 0.90  |  |  |  |  |  |  |  |  | 0.85  | 0.73  | 1.00    | 1.00    | 0.81  |  | 0.95  |  | 0.93    | 0.90  |
| <b>interior_indicator</b> | False |  |  |  |  |  |  |  |  | 1.00  | 1.00  | 0.00    | 0.00    | 1.00  |  | 0.00  |  | 0.00    | False |
| <b>trough_indicator</b>   | True  |  |  |  |  |  |  |  |  | 1.00  | 1.00  | 0.00    | 0.00    | 1.00  |  | 1.00  |  | 1.00    | True  |
| <b>U_D_depth</b>          | 0.25  |  |  |  |  |  |  |  |  | 0.93  | 0.30  | 0.00    | 0.00    | 0.30  |  | 0.04  |  | 0.20    | 0.25  |
| <b>U_I_interiority</b>    | 0.11  |  |  |  |  |  |  |  |  | 0.11  | 0.41  | 0.00    | 0.00    | 0.23  |  | 0.00  |  | 0.00    | 0.11  |
| <b>U_M_monotonicity</b>   | 0.48  |  |  |  |  |  |  |  |  | 0.76  | 0.70  | 0.00    | 0.00    | 0.63  |  | 0.58  |  | 0.67    | 0.48  |
| <b>U_C_convexity</b>      | 0.55  |  |  |  |  |  |  |  |  | 0.65  | 0.94  | 0.00    | 0.00    | 0.78  |  | 0.83  |  | 0.64    | 0.55  |
| <b>U_S_symmetry</b>       | 0.40  |  |  |  |  |  |  |  |  | 0.98  | 0.61  | 0.00    | 0.00    | 0.72  |  | 0.17  |  | 0.34    | 0.40  |
| <b>J_R_rise</b>           | 0.16  |  |  |  |  |  |  |  |  | 0.00  | 0.00  | 0.00    | 0.00    | 0.00  |  | 0.34  |  | 0.80    | 0.16  |
| <b>J_M_monotonicity</b>   | 0.51  |  |  |  |  |  |  |  |  | 0.41  | 0.47  | 0.46    | 0.48    | 0.49  |  | 0.68  |  | 0.59    | 0.51  |
| <b>J_C_rightconvex</b>    | 0.47  |  |  |  |  |  |  |  |  | 0.51  | 0.49  | 0.52    | 0.23    | 0.51  |  | 0.49  |  | 0.56    | 0.47  |
| <b>P_turning</b>          | 0.04  |  |  |  |  |  |  |  |  | 0.03  | 0.03  | 0.01    | 0.01    | 0.03  |  | 0.12  |  | 0.01    | 0.04  |
| <b>final_structure</b>    | U     |  |  |  |  |  |  |  |  | U     | U     | neither | neither | U     |  | J     |  | neither | U     |
| <b>U_supported</b>        | False |  |  |  |  |  |  |  |  | 1.00  | 1.00  | 0.00    | 0.00    | 1.00  |  | 0.00  |  | 0.00    | False |
| <b>J_supported</b>        | False |  |  |  |  |  |  |  |  | 0.00  | 0.00  | 0.00    | 0.00    | 0.00  |  | 1.00  |  | 0.00    | False |

Table S6ds. Slovakia Cantril U-shape ratings, 2006-2024

| KPI                    | Mean    | 2005 | 2006    | 2007 | 2008 | 2009 | 2010  | 2011 | 2012 | 2013    | 2014 | 2015 | 2016    | 2017    | 2018    | 2019    | 2020    | 2021    | 2022  | 2023  | 2024  |
|------------------------|---------|------|---------|------|------|------|-------|------|------|---------|------|------|---------|---------|---------|---------|---------|---------|-------|-------|-------|
| <b>shape_class</b>     | neither |      | neither |      |      |      | U     |      |      | neither |      |      | neither | neither | neither | neither | neither | neither | U     | U     | U     |
| <b>U_beauty</b>        | 0.01    |      | 0.00    |      |      |      | 0.03  |      |      | 0.00    |      |      | 0.00    | 0.00    | 0.00    | 0.00    | 0.00    | 0.00    | 0.01  | 0.01  | 0.08  |
| <b>J_beauty</b>        | 0.00    |      | 0.00    |      |      |      | 0.00  |      |      | 0.00    |      |      | 0.00    | 0.00    | 0.00    | 0.00    | 0.00    | 0.00    | 0.00  | 0.00  | 0.00  |
| <b>Dominance</b>       | 0.57    |      |         |      |      |      | 1.00  |      |      |         |      |      |         |         | -1.00   |         |         |         | 0.83  | 1.00  | 1.00  |
| <b>best_df</b>         | 4.42    |      | 4.00    |      |      |      | 5.00  |      |      | 3.00    |      |      | 5.00    | 3.00    | 5.00    | 4.00    | 5.00    | 5.00    | 4.00  | 5.00  | 5.00  |
| <b>p_value</b>         | 0.00    |      | 0.00    |      |      |      | 0.05  |      |      | 0.00    |      |      | 0.00    | 0.00    | 0.00    | 0.00    | 0.00    | 0.00    | 0.00  | 0.00  | 0.00  |
| <b>lr_stat</b>         | 35.44   |      | 40.76   |      |      |      | 17.14 |      |      | 21.04   |      |      | 29.92   | 37.24   | 56.83   | 33.90   | 24.93   | 39.71   | 54.37 | 33.03 | 36.43 |
| <b>linear_aic</b>      | 20.20   |      | 36.56   |      |      |      | 8.66  |      |      | 9.08    |      |      | 13.81   | 25.50   | 31.41   | -0.48   | 21.49   | 38.48   | 31.63 | 9.28  | 16.96 |
| <b>spline_aic</b>      | 1.59    |      | 11.80   |      |      |      | 9.52  |      |      | 2.03    |      |      | 1.89    | 2.25    | -7.43   | -18.38  | 14.56   | 16.76   | -6.74 | -5.75 | -1.46 |
| <b>min_age</b>         | 84.17   |      | 86.55   |      |      |      | 79.78 |      |      | 85.98   |      |      | 88.05   |         | 87.11   | 89.74   |         |         | 83.73 | 81.66 | 74.89 |
| <b>min_value</b>       | 4.53    |      | 2.30    |      |      |      | 5.42  |      |      | 4.79    |      |      | 4.76    |         | 4.83    | 4.46    |         |         | 4.83  | 4.38  | 4.97  |
| <b>amplitude</b>       | 2.58    |      | 4.13    |      |      |      | 1.37  |      |      | 2.18    |      |      | 1.64    | 3.83    | 2.51    | 2.76    | 1.91    | 3.36    | 2.16  | 2.70  | 2.41  |
| <b>delta_endpoints</b> | -1.28   |      | -0.93   |      |      |      | -0.54 |      |      | -1.26   |      |      | -0.36   | -3.77   | 0.70    | -2.49   | -1.89   | -1.63   | 0.27  | -2.08 | -1.38 |
| <b>n_minima</b>        | 2.58    |      | 2.00    |      |      |      | 4.00  |      |      | 2.00    |      |      | 3.00    | 0.00    | 3.00    | 3.00    | 3.00    | 3.00    | 3.00  | 2.00  | 3.00  |
| <b>n_maxima</b>        | 2.42    |      | 1.00    |      |      |      | 5.00  |      |      | 1.00    |      |      | 3.00    | 1.00    | 2.00    | 3.00    | 3.00    | 4.00    | 2.00  | 2.00  | 2.00  |
| <b>turning_points</b>  | 5.00    |      | 3.00    |      |      |      | 9.00  |      |      | 3.00    |      |      | 6.00    | 1.00    | 5.00    | 6.00    | 6.00    | 7.00    | 5.00  | 4.00  | 5.00  |

|                           |         |         |      |         |         |         |         |         |         |         |      |      |      |
|---------------------------|---------|---------|------|---------|---------|---------|---------|---------|---------|---------|------|------|------|
| <b>r_trough</b>           | 0.92    | 0.93    | 0.84 | 0.92    | 0.95    | 1.00    | 0.93    | 0.97    | 1.00    | 1.00    | 0.89 | 0.86 | 0.77 |
| <b>interior_indicator</b> | False   | 0.00    | 1.00 | 0.00    | 0.00    | 0.00    | 0.00    | 0.00    | 0.00    | 0.00    | 1.00 | 1.00 | 1.00 |
| <b>trough_indicator</b>   | True    | 1.00    | 1.00 | 1.00    | 1.00    | 0.00    | 1.00    | 1.00    | 0.00    | 0.00    | 1.00 | 1.00 | 1.00 |
| <b>U_D_depth</b>          | 0.39    | 0.77    | 0.43 | 0.42    | 0.76    | 0.00    | 0.72    | 0.01    | 0.00    | 0.00    | 0.88 | 0.23 | 0.43 |
| <b>U_I_interiority</b>    | 0.05    | 0.00    | 0.16 | 0.00    | 0.00    | 0.00    | 0.00    | 0.00    | 0.00    | 0.00    | 0.03 | 0.09 | 0.32 |
| <b>U_M_monotonicity</b>   | 0.65    | 0.93    | 0.73 | 0.93    | 0.87    | 0.00    | 0.87    | 0.94    | 0.00    | 0.00    | 0.86 | 0.84 | 0.88 |
| <b>U_C_convexity</b>      | 0.59    | 0.74    | 0.65 | 0.81    | 0.64    | 0.65    | 0.64    | 0.75    | 0.00    | 0.00    | 0.67 | 0.67 | 0.89 |
| <b>U_S_symmetry</b>       | 0.48    | 0.87    | 0.68 | 0.59    | 0.87    | 0.00    | 0.84    | 0.03    | 0.00    | 0.00    | 0.93 | 0.37 | 0.60 |
| <b>J_R_rise</b>           | 0.03    | 0.00    | 0.00 | 0.00    | 0.00    | 0.00    | 0.28    | 0.00    | 0.00    | 0.00    | 0.12 | 0.00 | 0.00 |
| <b>J_M_monotonicity</b>   | 0.28    | 0.19    | 0.41 | 0.21    | 0.29    | 0.05    | 0.30    | 0.15    | 0.40    | 0.47    | 0.34 | 0.19 | 0.41 |
| <b>J_C_rightconvex</b>    | 0.55    | 0.51    | 0.51 | 0.58    | 0.57    | 0.26    | 0.57    | 0.64    | 0.49    | 0.52    | 0.74 | 0.53 | 0.73 |
| <b>P_turning</b>          | 0.16    | 0.25    | 0.00 | 0.25    | 0.03    | 1.00    | 0.06    | 0.03    | 0.03    | 0.01    | 0.06 | 0.12 | 0.06 |
| <b>final_structure</b>    | neither | neither | U    | neither | U    | U    | U    |
| <b>U_supported</b>        | False   | 0.00    | 1.00 | 0.00    | 0.00    | 0.00    | 0.00    | 0.00    | 0.00    | 0.00    | 1.00 | 1.00 | 1.00 |
| <b>J_supported</b>        | False   | 0.00    | 0.00 | 0.00    | 0.00    | 0.00    | 0.00    | 0.00    | 0.00    | 0.00    | 0.00 | 0.00 | 0.00 |

Table S6dt. Slovenia Cantril U-shape ratings, 2006-2024

| KPI                       | Mean    | 2005 | 2006 | 2007 | 2008 | 2009 | 2010  | 2011  | 2012    | 2013    | 2014   | 2015 | 2016  | 2017    | 2018 | 2019    | 2020    | 2021   | 2022 | 2023 | 2024    |
|---------------------------|---------|------|------|------|------|------|-------|-------|---------|---------|--------|------|-------|---------|------|---------|---------|--------|------|------|---------|
| <b>shape_class</b>        | neither |      |      |      |      |      | U     | U     | neither | neither | U      |      | U     | neither |      | neither | neither | U      |      |      | neither |
| <b>U_beauty</b>           | 0.09    |      |      |      |      |      | 0.09  | 0.27  | 0.00    | 0.00    | 0.51   |      | 0.08  | 0.00    |      | 0.00    | 0.00    | 0.05   |      |      | 0.00    |
| <b>J_beauty</b>           | 0.00    |      |      |      |      |      | 0.00  | 0.00  | 0.00    | 0.00    | 0.00   |      | 0.01  | 0.00    |      | 0.00    | 0.00    | 0.00   |      |      | 0.00    |
| <b>Dominance</b>          | 0.95    |      |      |      |      |      | 0.93  | 0.97  |         |         | 1.00   |      | 0.87  |         |      |         |         | 0.99   |      |      |         |
| <b>best_df</b>            | 4.64    |      |      |      |      |      | 5.00  | 5.00  | 5.00    | 4.00    | 5.00   |      | 4.00  | 5.00    |      | 5.00    | 4.00    | 5.00   |      |      | 4.00    |
| <b>p_value</b>            | 0.00    |      |      |      |      |      | 0.00  | 0.00  | 0.01    | 0.00    | 0.00   |      | 0.00  | 0.00    |      | 0.00    | 0.00    | 0.00   |      |      | 0.00    |
| <b>lr_stat</b>            | 48.44   |      |      |      |      |      | 57.13 | 79.30 | 22.52   | 43.89   | 65.21  |      | 63.92 | 32.50   |      | 30.49   | 37.00   | 43.72  |      |      | 57.21   |
| <b>linear_aic</b>         | 27.56   |      |      |      |      |      | 52.87 | 52.49 | 10.45   | 25.73   | 32.38  |      | 49.91 | 17.22   |      | 19.35   | 22.71   | 3.72   |      |      | 16.35   |
| <b>spline_aic</b>         | -3.61   |      |      |      |      |      | 13.74 | -8.81 | 5.93    | -2.15   | -14.82 |      | 1.99  | 2.72    |      | 6.86    | 1.71    | -22.00 |      |      | -24.86  |
| <b>min_age</b>            | 71.30   |      |      |      |      |      | 70.76 | 53.47 | 89.56   |         | 55.91  |      | 60.61 | 88.05   |      |         |         | 80.72  |      |      |         |
| <b>min_value</b>          | 5.38    |      |      |      |      |      | 5.38  | 5.53  | 4.64    |         | 5.10   |      | 5.55  | 4.92    |      |         |         | 6.55   |      |      |         |
| <b>amplitude</b>          | 2.97    |      |      |      |      |      | 4.61  | 4.47  | 2.61    | 2.37    | 2.40   |      | 4.44  | 3.00    |      | 2.87    | 2.39    | 1.03   |      |      | 2.50    |
| <b>delta_endpoints</b>    | -0.59   |      |      |      |      |      | 2.67  | 2.20  | -2.13   | -2.32   | -0.70  |      | 3.26  | -1.93   |      | -2.87   | -2.39   | 0.12   |      |      | -2.45   |
| <b>n_minima</b>           | 2.91    |      |      |      |      |      | 3.00  | 3.00  | 3.00    | 2.00    | 2.00   |      | 3.00  | 3.00    |      | 3.00    | 3.00    | 4.00   |      |      | 3.00    |
| <b>n_maxima</b>           | 2.91    |      |      |      |      |      | 3.00  | 3.00  | 3.00    | 3.00    | 1.00   |      | 3.00  | 2.00    |      | 3.00    | 3.00    | 4.00   |      |      | 4.00    |
| <b>turning_points</b>     | 5.82    |      |      |      |      |      | 6.00  | 6.00  | 6.00    | 5.00    | 3.00   |      | 6.00  | 5.00    |      | 6.00    | 6.00    | 8.00   |      |      | 7.00    |
| <b>r_trough</b>           | 0.82    |      |      |      |      |      | 0.72  | 0.49  | 0.97    | 1.00    | 0.52   |      | 0.58  | 0.95    |      | 1.00    | 1.00    | 0.85   |      |      | 1.00    |
| <b>interior_indicator</b> | False   |      |      |      |      |      | 1.00  | 1.00  | 0.00    | 0.00    | 1.00   |      | 1.00  | 0.00    |      | 0.00    | 0.00    | 1.00   |      |      | 0.00    |
| <b>trough_indicator</b>   | True    |      |      |      |      |      | 1.00  | 1.00  | 1.00    | 0.00    | 1.00   |      | 1.00  | 1.00    |      | 0.00    | 0.00    | 1.00   |      |      | 0.00    |
| <b>U_D_depth</b>          | 0.29    |      |      |      |      |      | 0.42  | 0.51  | 0.14    | 0.00    | 0.71   |      | 0.27  | 0.36    |      | 0.00    | 0.00    | 0.81   |      |      | 0.00    |
| <b>U_I_interiority</b>    | 0.30    |      |      |      |      |      | 0.46  | 0.97  | 0.00    | 0.00    | 0.95   |      | 0.80  | 0.00    |      | 0.00    | 0.00    | 0.13   |      |      | 0.00    |
| <b>U_M_monotonicity</b>   | 0.52    |      |      |      |      |      | 0.79  | 0.77  | 0.85    | 0.00    | 0.92   |      | 0.72  | 0.88    |      | 0.00    | 0.00    | 0.74   |      |      | 0.00    |
| <b>U_C_convexity</b>      | 0.49    |      |      |      |      |      | 0.67  | 1.00  | 0.68    | 0.00    | 0.90   |      | 0.85  | 0.66    |      | 0.00    | 0.00    | 0.68   |      |      | 0.00    |
| <b>U_S_symmetry</b>       | 0.38    |      |      |      |      |      | 0.59  | 0.67  | 0.26    | 0.00    | 0.83   |      | 0.42  | 0.53    |      | 0.00    | 0.00    | 0.93   |      |      | 0.00    |
| <b>J_R_rise</b>           | 0.17    |      |      |      |      |      | 0.58  | 0.49  | 0.00    | 0.00    | 0.00   |      | 0.73  | 0.00    |      | 0.00    | 0.00    | 0.11   |      |      | 0.00    |
| <b>J_M_monotonicity</b>   | 0.38    |      |      |      |      |      | 0.34  | 0.49  | 0.31    | 0.33    | 0.41   |      | 0.42  | 0.26    |      | 0.35    | 0.49    | 0.48   |      |      | 0.32    |

|                        |         |  |  |  |      |      |         |         |      |  |      |         |  |         |         |      |  |  |         |
|------------------------|---------|--|--|--|------|------|---------|---------|------|--|------|---------|--|---------|---------|------|--|--|---------|
| <b>J_C_rightconvex</b> | 0.56    |  |  |  | 0.59 | 0.79 | 0.52    | 0.51    | 0.53 |  | 0.82 | 0.58    |  | 0.39    | 0.48    | 0.54 |  |  | 0.45    |
| <b>P_turning</b>       | 0.05    |  |  |  | 0.03 | 0.03 | 0.03    | 0.06    | 0.25 |  | 0.03 | 0.06    |  | 0.03    | 0.03    | 0.01 |  |  | 0.01    |
| <b>final_structure</b> | neither |  |  |  | U    | U    | neither | neither | U    |  | U    | neither |  | neither | neither | U    |  |  | neither |
| <b>U_supported</b>     | False   |  |  |  | 1.00 | 1.00 | 0.00    | 0.00    | 1.00 |  | 1.00 | 0.00    |  | 0.00    | 0.00    | 1.00 |  |  | 0.00    |
| <b>J_supported</b>     | False   |  |  |  | 0.00 | 0.00 | 0.00    | 0.00    | 0.00 |  | 0.00 | 0.00    |  | 0.00    | 0.00    | 0.00 |  |  | 0.00    |

Table S6du. Somaliland Cantril U-shape ratings, 2006-2024

| KPI                       | Mean  | 2005 | 2006 | 2007 | 2008 | 2009 | 2010 | 2011  | 2012 | 2013 | 2014 | 2015 | 2016 | 2017 | 2018 | 2019 | 2020 | 2021 | 2022 | 2023 | 2024 |  |
|---------------------------|-------|------|------|------|------|------|------|-------|------|------|------|------|------|------|------|------|------|------|------|------|------|--|
| <b>shape_class</b>        | U     |      |      |      |      |      |      | U     |      |      |      |      |      |      |      |      |      |      |      |      |      |  |
| <b>U_beauty</b>           | 0.00  |      |      |      |      |      |      | 0.00  |      |      |      |      |      |      |      |      |      |      |      |      |      |  |
| <b>J_beauty</b>           | 0.00  |      |      |      |      |      |      | 0.00  |      |      |      |      |      |      |      |      |      |      |      |      |      |  |
| <b>Dominance</b>          | 1.00  |      |      |      |      |      |      | 1.00  |      |      |      |      |      |      |      |      |      |      |      |      |      |  |
| <b>best_df</b>            | 3.00  |      |      |      |      |      |      | 3.00  |      |      |      |      |      |      |      |      |      |      |      |      |      |  |
| <b>p_value</b>            | 0.78  |      |      |      |      |      |      | 0.78  |      |      |      |      |      |      |      |      |      |      |      |      |      |  |
| <b>lr_stat</b>            | 4.02  |      |      |      |      |      |      | 4.02  |      |      |      |      |      |      |      |      |      |      |      |      |      |  |
| <b>linear_aic</b>         | 13.15 |      |      |      |      |      |      | 13.15 |      |      |      |      |      |      |      |      |      |      |      |      |      |  |
| <b>spline_aic</b>         | 23.13 |      |      |      |      |      |      | 23.13 |      |      |      |      |      |      |      |      |      |      |      |      |      |  |
| <b>min_age</b>            | 82.98 |      |      |      |      |      |      | 82.98 |      |      |      |      |      |      |      |      |      |      |      |      |      |  |
| <b>min_value</b>          | 3.91  |      |      |      |      |      |      | 3.91  |      |      |      |      |      |      |      |      |      |      |      |      |      |  |
| <b>amplitude</b>          | 1.35  |      |      |      |      |      |      | 1.35  |      |      |      |      |      |      |      |      |      |      |      |      |      |  |
| <b>delta_endpoints</b>    | -0.82 |      |      |      |      |      |      | -0.82 |      |      |      |      |      |      |      |      |      |      |      |      |      |  |
| <b>n_minima</b>           | 3.00  |      |      |      |      |      |      | 3.00  |      |      |      |      |      |      |      |      |      |      |      |      |      |  |
| <b>n_maxima</b>           | 3.00  |      |      |      |      |      |      | 3.00  |      |      |      |      |      |      |      |      |      |      |      |      |      |  |
| <b>turning_points</b>     | 6.00  |      |      |      |      |      |      | 6.00  |      |      |      |      |      |      |      |      |      |      |      |      |      |  |
| <b>r_trough</b>           | 0.88  |      |      |      |      |      |      | 0.88  |      |      |      |      |      |      |      |      |      |      |      |      |      |  |
| <b>interior_indicator</b> | True  |      |      |      |      |      |      | 1.00  |      |      |      |      |      |      |      |      |      |      |      |      |      |  |
| <b>trough_indicator</b>   | True  |      |      |      |      |      |      | 1.00  |      |      |      |      |      |      |      |      |      |      |      |      |      |  |
| <b>U_D_depth</b>          | 0.07  |      |      |      |      |      |      | 0.07  |      |      |      |      |      |      |      |      |      |      |      |      |      |  |
| <b>U_I_interiority</b>    | 0.05  |      |      |      |      |      |      | 0.05  |      |      |      |      |      |      |      |      |      |      |      |      |      |  |
| <b>U_M_monotonicity</b>   | 0.86  |      |      |      |      |      |      | 0.86  |      |      |      |      |      |      |      |      |      |      |      |      |      |  |
| <b>U_C_convexity</b>      | 0.84  |      |      |      |      |      |      | 0.84  |      |      |      |      |      |      |      |      |      |      |      |      |      |  |
| <b>U_S_symmetry</b>       | 0.19  |      |      |      |      |      |      | 0.19  |      |      |      |      |      |      |      |      |      |      |      |      |      |  |
| <b>J_R_rise</b>           | 0.00  |      |      |      |      |      |      | 0.00  |      |      |      |      |      |      |      |      |      |      |      |      |      |  |
| <b>J_M_monotonicity</b>   | 0.35  |      |      |      |      |      |      | 0.35  |      |      |      |      |      |      |      |      |      |      |      |      |      |  |
| <b>J_C_rightconvex</b>    | 0.78  |      |      |      |      |      |      | 0.78  |      |      |      |      |      |      |      |      |      |      |      |      |      |  |
| <b>P_turning</b>          | 0.03  |      |      |      |      |      |      | 0.03  |      |      |      |      |      |      |      |      |      |      |      |      |      |  |
| <b>final_structure</b>    | U     |      |      |      |      |      |      | U     |      |      |      |      |      |      |      |      |      |      |      |      |      |  |
| <b>U_supported</b>        | True  |      |      |      |      |      |      | 1.00  |      |      |      |      |      |      |      |      |      |      |      |      |      |  |
| <b>J_supported</b>        | False |      |      |      |      |      |      | 0.00  |      |      |      |      |      |      |      |      |      |      |      |      |      |  |

Table S6dv. South Africa Cantril U-shape ratings, 2006-2024

| KPI                | Mean    | 2005 | 2006    | 2007 | 2008    | 2009 | 2010 | 2011 | 2012 | 2013    | 2014    | 2015 | 2016 | 2017    | 2018 | 2019    | 2020 | 2021 | 2022 | 2023 | 2024    |
|--------------------|---------|------|---------|------|---------|------|------|------|------|---------|---------|------|------|---------|------|---------|------|------|------|------|---------|
| <b>shape_class</b> | neither |      | neither |      | neither |      | U    |      | U    | neither | neither |      |      | neither |      | neither |      |      |      | U    | neither |

|                    |         |         |         |       |       |         |         |      |         |         |       |         |
|--------------------|---------|---------|---------|-------|-------|---------|---------|------|---------|---------|-------|---------|
| U_beauty           | 0.01    | 0.00    | 0.00    | 0.00  | 0.02  | 0.00    | 0.00    | 0.00 | 0.00    | 0.00    | 0.05  | 0.00    |
| J_beauty           | 0.00    | 0.00    | 0.00    | 0.00  | 0.00  | 0.00    | 0.00    | 0.00 | 0.00    | 0.00    | 0.00  | 0.00    |
| Dominance          | 0.50    |         | 1.00    | 1.00  | 1.00  | 1.00    |         |      |         |         | 1.00  | -1.00   |
| best_df            | 4.50    | 5.00    | 5.00    | 5.00  | 5.00  | 3.00    | 4.00    |      | 3.00    | 5.00    | 5.00  | 5.00    |
| p_value            | 0.02    | 0.00    | 0.00    | 0.00  | 0.02  | 0.21    | 0.00    |      | 0.01    | 0.01    | 0.00  | 0.00    |
| lr_stat            | 35.15   | 63.46   | 45.05   | 24.65 | 19.70 | 9.71    | 49.32   |      | 19.60   | 22.66   | 43.87 | 53.46   |
| linear_aic         | 37.95   | 60.79   | 52.76   | 16.55 | 26.13 | 34.70   | 23.66   |      | 43.63   | 37.14   | 35.65 | 48.53   |
| spline_aic         | 19.81   | 15.32   | 25.71   | 9.90  | 24.43 | 38.99   | -9.65   |      | 38.03   | 32.48   | 9.77  | 13.07   |
| min_age            | 83.57   |         | 88.05   | 81.66 | 82.98 | 84.86   |         |      |         | 88.99   | 71.32 | 87.11   |
| min_value          | 2.88    |         | -0.06   | 3.46  | 3.39  | 2.63    |         |      |         | 2.13    | 4.36  | 4.26    |
| amplitude          | 3.55    | 7.45    | 5.91    | 1.73  | 2.02  | 1.86    | 2.30    |      | 2.81    | 3.64    | 3.02  | 4.75    |
| delta_endpoints    | -0.85   | -4.34   | -0.40   | -1.33 | -0.19 | -0.21   | -2.10   |      | -1.23   | -1.79   | -0.72 | 3.80    |
| n_minima           | 3.40    | 3.00    | 4.00    | 3.00  | 3.00  | 3.00    | 4.00    |      | 2.00    | 5.00    | 3.00  | 4.00    |
| n_maxima           | 3.30    | 4.00    | 3.00    | 3.00  | 3.00  | 3.00    | 4.00    |      | 2.00    | 4.00    | 3.00  | 4.00    |
| turning_points     | 6.70    | 7.00    | 7.00    | 6.00  | 6.00  | 6.00    | 8.00    |      | 4.00    | 9.00    | 6.00  | 8.00    |
| r_trough           | 0.92    | 1.00    | 0.95    | 0.86  | 0.88  | 0.90    | 1.00    |      | 1.00    | 0.96    | 0.72  | 0.93    |
| interior_indicator | False   | 0.00    | 0.00    | 1.00  | 1.00  | 0.00    | 0.00    |      | 0.00    | 0.00    | 1.00  | 0.00    |
| trough_indicator   | True    | 0.00    | 1.00    | 1.00  | 1.00  | 1.00    | 0.00    |      | 0.00    | 1.00    | 1.00  | 1.00    |
| U_D_depth          | 0.32    | 0.00    | 0.85    | 0.03  | 0.80  | 0.45    | 0.00    |      | 0.00    | 0.51    | 0.38  | 0.20    |
| U_I_interiority    | 0.06    | 0.00    | 0.00    | 0.09  | 0.05  | 0.00    | 0.00    |      | 0.00    | 0.00    | 0.44  | 0.00    |
| U_M_monotonicity   | 0.51    | 0.00    | 0.83    | 0.68  | 0.78  | 0.75    | 0.00    |      | 0.00    | 0.76    | 0.54  | 0.75    |
| U_C_convexity      | 0.51    | 0.00    | 0.69    | 0.58  | 0.81  | 1.00    | 0.00    |      | 0.00    | 0.66    | 0.76  | 0.64    |
| U_S_symmetry       | 0.46    | 0.00    | 0.96    | 0.07  | 0.94  | 0.89    | 0.00    |      | 0.00    | 0.67    | 0.76  | 0.33    |
| J_R_rise           | 0.08    | 0.00    | 0.00    | 0.00  | 0.00  | 0.00    | 0.00    |      | 0.00    | 0.00    | 0.00  | 0.80    |
| J_M_monotonicity   | 0.47    | 0.67    | 0.35    | 0.37  | 0.47  | 0.50    | 0.38    |      | 0.55    | 0.45    | 0.50  | 0.48    |
| J_C_rightconvex    | 0.54    | 0.46    | 0.52    | 0.46  | 0.64  | 0.90    | 0.48    |      | 0.36    | 0.55    | 0.44  | 0.55    |
| P_turning          | 0.03    | 0.01    | 0.01    | 0.03  | 0.03  | 0.03    | 0.01    |      | 0.12    | 0.00    | 0.03  | 0.01    |
| final_structure    | neither | neither | neither | U     | U     | neither | neither |      | neither | neither | U     | neither |
| U_supported        | False   | 0.00    | 0.00    | 1.00  | 1.00  | 0.00    | 0.00    |      | 0.00    | 0.00    | 1.00  | 0.00    |
| J_supported        | False   | 0.00    | 0.00    | 0.00  | 0.00  | 0.00    | 0.00    |      | 0.00    | 0.00    | 0.00  | 0.00    |

Table S6dw. South Korea Cantril U-shape ratings, 2006-2024

| KPI         | Mean    | 2005 | 2006 | 2007 | 2008 | 2009 | 2010 | 2011 | 2012  | 2013 | 2014    | 2015 | 2016 | 2017   | 2018    | 2019    | 2020 | 2021    | 2022  | 2023  | 2024    |
|-------------|---------|------|------|------|------|------|------|------|-------|------|---------|------|------|--------|---------|---------|------|---------|-------|-------|---------|
| shape_class | neither |      |      |      |      |      |      |      | U     |      | neither |      |      | U      | neither | neither |      | neither | U     | U     | neither |
| U_beauty    | 0.05    |      |      |      |      |      |      |      | 0.04  |      | 0.00    |      |      | 0.11   | 0.00    | 0.00    |      | 0.00    | 0.04  | 0.24  | 0.00    |
| J_beauty    | 0.00    |      |      |      |      |      |      |      | 0.00  |      | 0.00    |      |      | 0.00   | 0.00    | 0.00    |      | 0.00    | 0.00  | 0.00  | 0.00    |
| Dominance   | 0.57    |      |      |      |      |      |      |      | 0.85  |      |         |      |      | 1.00   | -1.00   |         |      |         | 1.00  | 0.98  |         |
| best_df     | 4.44    |      |      |      |      |      |      |      | 5.00  |      | 4.00    |      |      | 5.00   | 5.00    | 4.00    |      | 5.00    | 4.00  | 4.00  | 4.00    |
| p_value     | 0.01    |      |      |      |      |      |      |      | 0.00  |      | 0.02    |      |      | 0.00   | 0.00    | 0.00    |      | 0.00    | 0.08  | 0.00  | 0.00    |
| lr_stat     | 34.90   |      |      |      |      |      |      |      | 39.01 |      | 17.67   |      |      | 54.48  | 43.63   | 39.09   |      | 31.52   | 13.88 | 35.88 | 38.96   |
| linear_aic  | 17.80   |      |      |      |      |      |      |      | 37.62 |      | -2.63   |      |      | 25.66  | 40.33   | 9.64    |      | 8.93    | 14.04 | 10.82 | 15.79   |
| spline_aic  | -0.21   |      |      |      |      |      |      |      | 16.61 |      | -4.29   |      |      | -10.82 | 14.70   | -13.44  |      | -4.59   | 16.16 | -9.06 | -7.17   |
| min_age     | 79.38   |      |      |      |      |      |      |      | 81.29 |      |         |      |      | 75.83  | 87.11   | 90.68   |      | 91.44   | 80.16 | 49.14 |         |
| min_value   | 4.85    |      |      |      |      |      |      |      | 4.49  |      |         |      |      | 5.15   | 4.43    | 3.95    |      | 4.99    | 5.35  | 5.58  |         |

|                           |         |  |  |      |         |  |  |       |         |         |  |         |       |      |         |
|---------------------------|---------|--|--|------|---------|--|--|-------|---------|---------|--|---------|-------|------|---------|
| <b>amplitude</b>          | 2.26    |  |  | 3.18 | 1.99    |  |  | 2.15  | 3.57    | 2.67    |  | 2.13    | 1.49  | 1.12 | 2.04    |
| <b>delta_endpoints</b>    | -0.58   |  |  | 1.39 | -1.99   |  |  | -0.24 | 1.85    | -2.62   |  | -1.81   | -0.83 | 0.26 | -1.26   |
| <b>n_minima</b>           | 3.22    |  |  | 3.00 | 3.00    |  |  | 4.00  | 3.00    | 3.00    |  | 4.00    | 3.00  | 3.00 | 3.00    |
| <b>n_maxima</b>           | 3.11    |  |  | 3.00 | 3.00    |  |  | 4.00  | 3.00    | 2.00    |  | 4.00    | 2.00  | 3.00 | 4.00    |
| <b>turning_points</b>     | 6.33    |  |  | 6.00 | 6.00    |  |  | 8.00  | 6.00    | 5.00    |  | 8.00    | 5.00  | 6.00 | 7.00    |
| <b>r_trough</b>           | 0.87    |  |  | 0.86 | 1.00    |  |  | 0.78  | 0.93    | 0.98    |  | 0.99    | 0.84  | 0.43 | 1.00    |
| <b>interior_indicator</b> | False   |  |  | 1.00 | 0.00    |  |  | 1.00  | 0.00    | 0.00    |  | 0.00    | 1.00  | 1.00 | 0.00    |
| <b>trough_indicator</b>   | True    |  |  | 1.00 | 0.00    |  |  | 1.00  | 1.00    | 1.00    |  | 1.00    | 1.00  | 1.00 | 0.00    |
| <b>U_D_depth</b>          | 0.30    |  |  | 0.56 | 0.00    |  |  | 0.63  | 0.48    | 0.02    |  | 0.01    | 0.45  | 0.60 | 0.00    |
| <b>U_I_interiority</b>    | 0.15    |  |  | 0.11 | 0.00    |  |  | 0.29  | 0.00    | 0.00    |  | 0.00    | 0.14  | 0.82 | 0.00    |
| <b>U_M_monotonicity</b>   | 0.62    |  |  | 0.85 | 0.00    |  |  | 0.73  | 0.81    | 0.87    |  | 0.79    | 0.85  | 0.69 | 0.00    |
| <b>U_C_convexity</b>      | 0.62    |  |  | 0.84 | 0.00    |  |  | 0.92  | 0.64    | 0.85    |  | 0.65    | 0.80  | 0.85 | 0.00    |
| <b>U_S_symmetry</b>       | 0.42    |  |  | 0.72 | 0.00    |  |  | 0.92  | 0.65    | 0.04    |  | 0.01    | 0.62  | 0.84 | 0.00    |
| <b>J_R_rise</b>           | 0.13    |  |  | 0.44 | 0.00    |  |  | 0.00  | 0.52    | 0.00    |  | 0.00    | 0.00  | 0.23 | 0.00    |
| <b>J_M_monotonicity</b>   | 0.38    |  |  | 0.39 | 0.26    |  |  | 0.43  | 0.39    | 0.25    |  | 0.38    | 0.40  | 0.46 | 0.44    |
| <b>J_C_rightconvex</b>    | 0.53    |  |  | 0.74 | 0.32    |  |  | 0.59  | 0.56    | 0.40    |  | 0.49    | 0.63  | 0.55 | 0.49    |
| <b>P_turning</b>          | 0.03    |  |  | 0.03 | 0.03    |  |  | 0.01  | 0.03    | 0.06    |  | 0.01    | 0.06  | 0.03 | 0.01    |
| <b>final_structure</b>    | neither |  |  | U    | neither |  |  | U     | neither | neither |  | neither | U     | U    | neither |
| <b>U_supported</b>        | False   |  |  | 1.00 | 0.00    |  |  | 1.00  | 0.00    | 0.00    |  | 0.00    | 1.00  | 1.00 | 0.00    |
| <b>J_supported</b>        | False   |  |  | 0.00 | 0.00    |  |  | 0.00  | 0.00    | 0.00    |  | 0.00    | 0.00  | 0.00 | 0.00    |

Table S6dx. South Sudan Cantril U-shape ratings, 2006-2024

| KPI                       | Mean  | 2005 | 2006 | 2007 | 2008 | 2009 | 2010 | 2011 | 2012 | 2013 | 2014 | 2015 | 2016 | 2017  | 2018 | 2019 | 2020 | 2021 | 2022 | 2023 | 2024 |  |  |
|---------------------------|-------|------|------|------|------|------|------|------|------|------|------|------|------|-------|------|------|------|------|------|------|------|--|--|
| <b>shape_class</b>        | U     |      |      |      |      |      |      |      |      |      |      |      |      | U     |      |      |      |      |      |      |      |  |  |
| <b>U_beauty</b>           | 0.06  |      |      |      |      |      |      |      |      |      |      |      |      | 0.06  |      |      |      |      |      |      |      |  |  |
| <b>J_beauty</b>           | 0.00  |      |      |      |      |      |      |      |      |      |      |      |      | 0.00  |      |      |      |      |      |      |      |  |  |
| <b>Dominance</b>          | 0.85  |      |      |      |      |      |      |      |      |      |      |      |      | 0.85  |      |      |      |      |      |      |      |  |  |
| <b>best_df</b>            | 3.00  |      |      |      |      |      |      |      |      |      |      |      |      | 3.00  |      |      |      |      |      |      |      |  |  |
| <b>p_value</b>            | 0.01  |      |      |      |      |      |      |      |      |      |      |      |      | 0.01  |      |      |      |      |      |      |      |  |  |
| <b>lr_stat</b>            | 19.73 |      |      |      |      |      |      |      |      |      |      |      |      | 19.73 |      |      |      |      |      |      |      |  |  |
| <b>linear_aic</b>         | 48.73 |      |      |      |      |      |      |      |      |      |      |      |      | 48.73 |      |      |      |      |      |      |      |  |  |
| <b>spline_aic</b>         | 43.00 |      |      |      |      |      |      |      |      |      |      |      |      | 43.00 |      |      |      |      |      |      |      |  |  |
| <b>min_age</b>            | 69.63 |      |      |      |      |      |      |      |      |      |      |      |      | 69.63 |      |      |      |      |      |      |      |  |  |
| <b>min_value</b>          | 1.95  |      |      |      |      |      |      |      |      |      |      |      |      | 1.95  |      |      |      |      |      |      |      |  |  |
| <b>amplitude</b>          | 3.49  |      |      |      |      |      |      |      |      |      |      |      |      | 3.49  |      |      |      |      |      |      |      |  |  |
| <b>delta_endpoints</b>    | 1.14  |      |      |      |      |      |      |      |      |      |      |      |      | 1.14  |      |      |      |      |      |      |      |  |  |
| <b>n_minima</b>           | 2.00  |      |      |      |      |      |      |      |      |      |      |      |      | 2.00  |      |      |      |      |      |      |      |  |  |
| <b>n_maxima</b>           | 3.00  |      |      |      |      |      |      |      |      |      |      |      |      | 3.00  |      |      |      |      |      |      |      |  |  |
| <b>turning_points</b>     | 5.00  |      |      |      |      |      |      |      |      |      |      |      |      | 5.00  |      |      |      |      |      |      |      |  |  |
| <b>r_trough</b>           | 0.70  |      |      |      |      |      |      |      |      |      |      |      |      | 0.70  |      |      |      |      |      |      |      |  |  |
| <b>interior_indicator</b> | True  |      |      |      |      |      |      |      |      |      |      |      |      | 1.00  |      |      |      |      |      |      |      |  |  |
| <b>trough_indicator</b>   | True  |      |      |      |      |      |      |      |      |      |      |      |      | 1.00  |      |      |      |      |      |      |      |  |  |
| <b>U_D_depth</b>          | 0.24  |      |      |      |      |      |      |      |      |      |      |      |      | 0.24  |      |      |      |      |      |      |      |  |  |
| <b>U_I_interiority</b>    | 0.50  |      |      |      |      |      |      |      |      |      |      |      |      | 0.50  |      |      |      |      |      |      |      |  |  |

|                  |       |      |
|------------------|-------|------|
| U_M_monotonicity | 0.76  | 0.76 |
| U_C_convexity    | 0.87  | 0.87 |
| U_S_symmetry     | 0.59  | 0.59 |
| J_R_rise         | 0.33  | 0.33 |
| J_M_monotonicity | 0.43  | 0.43 |
| J_C_rightconvex  | 0.46  | 0.46 |
| P_turning        | 0.06  | 0.06 |
| final_structure  | U     | U    |
| U_supported      | True  | 1.00 |
| J_supported      | False | 0.00 |

Table S6dy. Spain Cantril U-shape ratings, 2006-2024

| KPI                | Mean    | 2005  | 2006 | 2007    | 2008    | 2009 | 2010  | 2011    | 2012    | 2013  | 2014 | 2015 | 2016 | 2017 | 2018 | 2019    | 2020 | 2021    | 2022    | 2023  | 2024 |
|--------------------|---------|-------|------|---------|---------|------|-------|---------|---------|-------|------|------|------|------|------|---------|------|---------|---------|-------|------|
| shape_class        | neither | U     |      | neither | neither |      | U     | neither | neither | U     |      |      |      |      |      | neither |      | neither | neither | U     |      |
| U_beauty           | 0.02    | 0.01  |      | 0.00    | 0.00    |      | 0.03  | 0.00    | 0.00    | 0.15  |      |      |      |      |      | 0.00    |      | 0.00    | 0.02    | 0.01  |      |
| J_beauty           | 0.00    | 0.00  |      | 0.00    | 0.00    |      | 0.00  | 0.00    | 0.00    | 0.00  |      |      |      |      |      | 0.00    |      | 0.00    | 0.00    | 0.00  |      |
| Dominance          | 0.92    | 0.77  |      |         |         |      | 1.00  |         |         | 0.99  |      |      |      |      |      |         |      |         | 0.92    | 0.77  |      |
| best_df            | 4.11    | 5.00  |      | 3.00    | 3.00    |      | 3.00  | 5.00    | 5.00    | 5.00  |      |      |      |      |      | 5.00    |      | 3.00    | 4.11    | 5.00  |      |
| p_value            | 0.01    | 0.00  |      | 0.00    | 0.00    |      | 0.06  | 0.00    | 0.00    | 0.00  |      |      |      |      |      | 0.00    |      | 0.00    | 0.01    | 0.00  |      |
| lr_stat            | 37.67   | 64.78 |      | 26.19   | 39.56   |      | 13.36 | 37.61   | 42.51   | 47.95 |      |      |      |      |      | 36.98   |      | 30.09   | 37.67   | 64.78 |      |
| linear_aic         | 26.97   | 42.13 |      | 23.27   | 26.26   |      | 12.03 | 18.87   | 29.35   | 26.47 |      |      |      |      |      | 32.52   |      | 31.85   | 26.97   | 42.13 |      |
| spline_aic         | 5.52    | -4.65 |      | 11.08   | 0.70    |      | 12.67 | -0.74   | 4.85    | -3.48 |      |      |      |      |      | 13.54   |      | 15.76   | 5.52    | -4.65 |      |
| min_age            | 64.86   | 82.41 |      |         |         |      | 76.21 |         | 87.68   | 54.22 |      |      |      |      |      |         |      | 23.77   | 64.86   | 82.41 |      |
| min_value          | 5.82    | 6.43  |      |         |         |      | 5.62  |         | 4.93    | 5.87  |      |      |      |      |      |         |      | 6.23    | 5.82    | 6.43  |      |
| amplitude          | 2.57    | 3.57  |      | 2.59    | 2.74    |      | 1.57  | 3.01    | 2.59    | 1.92  |      |      |      |      |      | 3.14    |      | 2.00    | 2.57    | 3.57  |      |
| delta_endpoints    | -1.06   | 2.27  |      | -2.59   | -2.65   |      | -1.15 | -2.88   | -0.03   | 0.80  |      |      |      |      |      | -3.14   |      | -0.18   | -1.06   | 2.27  |      |
| n_minima           | 3.22    | 4.00  |      | 3.00    | 2.00    |      | 2.00  | 2.00    | 4.00    | 4.00  |      |      |      |      |      | 4.00    |      | 4.00    | 3.22    | 4.00  |      |
| n_maxima           | 3.11    | 4.00  |      | 3.00    | 2.00    |      | 2.00  | 3.00    | 3.00    | 4.00  |      |      |      |      |      | 4.00    |      | 3.00    | 3.11    | 4.00  |      |
| turning_points     | 6.33    | 8.00  |      | 6.00    | 4.00    |      | 4.00  | 5.00    | 7.00    | 8.00  |      |      |      |      |      | 8.00    |      | 7.00    | 6.33    | 8.00  |      |
| r_trough           | 0.80    | 0.87  |      | 1.00    | 1.00    |      | 0.79  | 1.00    | 0.94    | 0.50  |      |      |      |      |      | 1.00    |      | 0.09    | 0.80    | 0.87  |      |
| interior_indicator | False   | 1.00  |      | 0.00    | 0.00    |      | 1.00  | 0.00    | 0.00    | 1.00  |      |      |      |      |      | 0.00    |      | 0.00    | False   | 1.00  |      |
| trough_indicator   | True    | 1.00  |      | 0.00    | 0.00    |      | 1.00  | 0.00    | 1.00    | 1.00  |      |      |      |      |      | 0.00    |      | 1.00    | True    | 1.00  |      |
| U_D_depth          | 0.33    | 0.36  |      | 0.00    | 0.00    |      | 0.27  | 0.00    | 0.99    | 0.43  |      |      |      |      |      | 0.00    |      | 0.91    | 0.33    | 0.36  |      |
| U_I_interiority    | 0.15    | 0.07  |      | 0.00    | 0.00    |      | 0.28  | 0.00    | 0.00    | 0.99  |      |      |      |      |      | 0.00    |      | 0.00    | 0.15    | 0.07  |      |
| U_M_monotonicity   | 0.43    | 0.77  |      | 0.00    | 0.00    |      | 0.82  | 0.00    | 0.85    | 0.66  |      |      |      |      |      | 0.00    |      | 0.76    | 0.43    | 0.77  |      |
| U_C_convexity      | 0.42    | 0.81  |      | 0.00    | 0.00    |      | 0.87  | 0.00    | 0.67    | 0.67  |      |      |      |      |      | 0.00    |      | 0.74    | 0.42    | 0.81  |      |
| U_S_symmetry       | 0.40    | 0.53  |      | 0.00    | 0.00    |      | 0.42  | 0.00    | 0.99    | 0.67  |      |      |      |      |      | 0.00    |      | 0.95    | 0.40    | 0.53  |      |
| J_R_rise           | 0.12    | 0.64  |      | 0.00    | 0.00    |      | 0.00  | 0.00    | 0.00    | 0.42  |      |      |      |      |      | 0.00    |      | 0.00    | 0.12    | 0.64  |      |
| J_M_monotonicity   | 0.38    | 0.49  |      | 0.39    | 0.28    |      | 0.22  | 0.27    | 0.33    | 0.51  |      |      |      |      |      | 0.42    |      | 0.53    | 0.38    | 0.49  |      |
| J_C_rightconvex    | 0.49    | 0.76  |      | 0.41    | 0.41    |      | 0.50  | 0.22    | 0.54    | 0.60  |      |      |      |      |      | 0.40    |      | 0.59    | 0.49    | 0.76  |      |
| P_turning          | 0.04    | 0.01  |      | 0.03    | 0.12    |      | 0.12  | 0.06    | 0.01    | 0.01  |      |      |      |      |      | 0.01    |      | 0.01    | 0.04    | 0.01  |      |
| final_structure    | neither | U     |      | neither | neither |      | U     | neither | neither | U     |      |      |      |      |      | neither |      | neither | neither | U     |      |
| U_supported        | False   | 1.00  |      | 0.00    | 0.00    |      | 1.00  | 0.00    | 0.00    | 1.00  |      |      |      |      |      | 0.00    |      | 0.00    | False   | 1.00  |      |
| J_supported        | False   | 0.00  |      | 0.00    | 0.00    |      | 0.00  | 0.00    | 0.00    | 0.00  |      |      |      |      |      | 0.00    |      | 0.00    | False   | 0.00  |      |

Table S6ez. Sri Lanka Cantril U-shape ratings, 2006-2024

| KPI                | Mean  | 2005 | 2006  | 2007 | 2008 | 2009 | 2010  | 2011 | 2012    | 2013  | 2014    | 2015    | 2016 | 2017 | 2018  | 2019 | 2020 | 2021 | 2022 | 2023 | 2024 | All     |
|--------------------|-------|------|-------|------|------|------|-------|------|---------|-------|---------|---------|------|------|-------|------|------|------|------|------|------|---------|
| shape_class        | U     |      | U     |      |      |      | U     |      | neither | U     | neither | neither |      |      | U     |      |      |      |      |      |      | neither |
| U_beauty           | 0.07  |      | 0.23  |      |      |      | 0.25  |      | 0.00    | 0.05  | 0.00    | 0.00    |      |      | 0.00  |      |      |      |      |      |      | 0.00    |
| J_beauty           | 0.00  |      | 0.01  |      |      |      | 0.01  |      | 0.00    | 0.00  | 0.00    | 0.00    |      |      | 0.00  |      |      |      |      |      |      | 0.00    |
| Dominance          | 0.60  |      | 0.93  |      |      |      | 0.92  |      |         | 1.00  |         |         |      |      | -0.81 |      |      |      |      |      |      | 0.94    |
| best_df            | 3.44  |      | 3.00  |      |      |      | 3.00  |      | 3.00    | 3.00  | 5.00    | 4.00    |      |      | 4.00  |      |      |      |      |      |      | 3.00    |
| p_value            | 0.16  |      | 0.00  |      |      |      | 0.56  |      | 0.00    | 0.88  | 0.00    | 0.00    |      |      | 0.00  |      |      |      |      |      |      | 0.01    |
| lr_stat            | 38.56 |      | 21.53 |      |      |      | 5.83  |      | 58.06   | 3.07  | 45.76   | 57.14   |      |      | 80.29 |      |      |      |      |      |      | 17.61   |
| linear_aic         | 32.46 |      | 16.75 |      |      |      | 29.04 |      | 25.11   | 29.81 | 14.47   | 47.86   |      |      | 57.79 |      |      |      |      |      |      | 29.11   |
| spline_aic         | 8.79  |      | 9.22  |      |      |      | 37.21 |      | -18.94  | 40.75 | -13.29  | 6.72    |      |      | -6.50 |      |      |      |      |      |      | 25.50   |
| min_age            | 70.07 |      | 51.77 |      |      |      | 51.96 |      |         | 76.02 | 89.37   |         |      |      | 84.29 |      |      |      |      |      |      | 67.00   |
| min_value          | 3.88  |      | 4.22  |      |      |      | 3.77  |      |         | 4.05  | 3.30    |         |      |      | 3.96  |      |      |      |      |      |      | 3.98    |
| amplitude          | 2.84  |      | 1.30  |      |      |      | 1.34  |      | 2.70    | 0.92  | 1.91    | 4.68    |      |      | 6.04  |      |      |      |      |      |      | 2.10    |
| delta_endpoints    | -0.56 |      | 0.24  |      |      |      | 0.64  |      | -2.69   | -0.29 | -0.93   | -3.87   |      |      | 5.03  |      |      |      |      |      |      | 1.25    |
| n_minima           | 2.78  |      | 2.00  |      |      |      | 3.00  |      | 2.00    | 2.00  | 4.00    | 2.00    |      |      | 4.00  |      |      |      |      |      |      | 4.00    |
| n_maxima           | 2.78  |      | 2.00  |      |      |      | 2.00  |      | 3.00    | 3.00  | 4.00    | 2.00    |      |      | 3.00  |      |      |      |      |      |      | 3.00    |
| turning_points     | 5.56  |      | 4.00  |      |      |      | 5.00  |      | 5.00    | 5.00  | 8.00    | 4.00    |      |      | 7.00  |      |      |      |      |      |      | 7.00    |
| r_trough           | 0.81  |      | 0.46  |      |      |      | 0.47  |      | 1.00    | 0.79  | 0.96    | 1.00    |      |      | 0.90  |      |      |      |      |      |      | 0.67    |
| interior_indicator | True  |      | 1.00  |      |      |      | 1.00  |      | 0.00    | 1.00  | 0.00    | 0.00    |      |      | 1.00  |      |      |      |      |      |      | 1.00    |
| trough_indicator   | True  |      | 1.00  |      |      |      | 1.00  |      | 0.00    | 1.00  | 1.00    | 0.00    |      |      | 1.00  |      |      |      |      |      |      | 1.00    |
| U_D_depth          | 0.25  |      | 0.41  |      |      |      | 0.52  |      | 0.00    | 0.35  | 0.36    | 0.00    |      |      | 0.17  |      |      |      |      |      |      | 0.40    |
| U_I_interiority    | 0.30  |      | 0.91  |      |      |      | 0.92  |      | 0.00    | 0.28  | 0.00    | 0.00    |      |      | 0.01  |      |      |      |      |      |      | 0.58    |
| U_M_monotonicity   | 0.51  |      | 0.83  |      |      |      | 0.76  |      | 0.00    | 0.74  | 0.75    | 0.00    |      |      | 0.77  |      |      |      |      |      |      | 0.71    |
| U_C_convexity      | 0.52  |      | 0.81  |      |      |      | 0.90  |      | 0.00    | 0.80  | 0.67    | 0.00    |      |      | 0.65  |      |      |      |      |      |      | 0.89    |
| U_S_symmetry       | 0.40  |      | 0.81  |      |      |      | 0.68  |      | 0.00    | 0.69  | 0.60    | 0.00    |      |      | 0.29  |      |      |      |      |      |      | 0.58    |
| J_R_rise           | 0.23  |      | 0.19  |      |      |      | 0.48  |      | 0.00    | 0.00  | 0.00    | 0.00    |      |      | 0.83  |      |      |      |      |      |      | 0.60    |
| J_M_monotonicity   | 0.47  |      | 0.58  |      |      |      | 0.53  |      | 0.35    | 0.36  | 0.45    | 0.60    |      |      | 0.46  |      |      |      |      |      |      | 0.53    |
| J_C_rightconvex    | 0.42  |      | 0.46  |      |      |      | 0.62  |      | 0.06    | 0.49  | 0.51    | 0.47    |      |      | 0.55  |      |      |      |      |      |      | 0.56    |
| P_turning          | 0.06  |      | 0.12  |      |      |      | 0.06  |      | 0.06    | 0.06  | 0.01    | 0.12    |      |      | 0.01  |      |      |      |      |      |      | 0.01    |
| final_structure    | U     |      | U     |      |      |      | U     |      | neither | U     | neither | neither |      |      | U     |      |      |      |      |      |      | U       |
| U_supported        | True  |      | 1.00  |      |      |      | 1.00  |      | 0.00    | 1.00  | 0.00    | 0.00    |      |      | 1.00  |      |      |      |      |      |      | 1.00    |
| J_supported        | False |      | 0.00  |      |      |      | 0.00  |      | 0.00    | 0.00  | 0.00    | 0.00    |      |      | 0.00  |      |      |      |      |      |      | 0.00    |

Table S6ea. Sudan Cantril U-shape ratings, 2006-2024

| KPI         | Mean    | 2005 | 2006 | 2007 | 2008 | 2009    | 2010 | 2011    | 2012    | 2013 | 2014 | 2015 | 2016 | 2017 | 2018 | 2019 | 2020 | 2021 | 2022 | 2023 | 2024 |  |
|-------------|---------|------|------|------|------|---------|------|---------|---------|------|------|------|------|------|------|------|------|------|------|------|------|--|
| shape_class | neither |      |      |      |      | neither |      | neither | neither |      |      |      |      |      |      |      |      |      |      |      |      |  |
| U_beauty    | 0.00    |      |      |      |      | 0.00    |      | 0.00    | 0.00    |      |      |      |      |      |      |      |      |      |      |      |      |  |
| J_beauty    | 0.00    |      |      |      |      | 0.00    |      | 0.00    | 0.00    |      |      |      |      |      |      |      |      |      |      |      |      |  |

|                           |         |         |  |         |         |
|---------------------------|---------|---------|--|---------|---------|
| <b>Dominance</b>          | -1.00   |         |  | -1.00   |         |
| <b>best_df</b>            | 4.33    | 3.00    |  | 5.00    | 5.00    |
| <b>p_value</b>            | 0.31    | 0.94    |  | 0.00    | 0.00    |
| <b>lr_stat</b>            | 29.26   | 2.32    |  | 34.84   | 50.61   |
| <b>linear_aic</b>         | 43.68   | 29.70   |  | 46.89   | 54.44   |
| <b>spline_aic</b>         | 31.09   | 41.38   |  | 30.05   | 21.83   |
| <b>min_age</b>            | 88.43   |         |  | 88.43   |         |
| <b>min_value</b>          | 0.71    |         |  | 0.71    |         |
| <b>amplitude</b>          | 3.83    | 0.74    |  | 4.89    | 5.86    |
| <b>delta_endpoints</b>    | -1.66   | -0.23   |  | 0.36    | -5.11   |
| <b>n_minima</b>           | 3.33    | 2.00    |  | 5.00    | 3.00    |
| <b>n_maxima</b>           | 3.33    | 3.00    |  | 4.00    | 3.00    |
| <b>turning_points</b>     | 6.67    | 5.00    |  | 9.00    | 6.00    |
| <b>r_trough</b>           | 0.98    | 1.00    |  | 0.95    | 1.00    |
| <b>interior_indicator</b> | False   | 0.00    |  | 0.00    | 0.00    |
| <b>trough_indicator</b>   | False   | 0.00    |  | 1.00    | 0.00    |
| <b>U_D_depth</b>          | 0.27    | 0.00    |  | 0.80    | 0.00    |
| <b>U_I_interiority</b>    | 0.00    | 0.00    |  | 0.00    | 0.00    |
| <b>U_M_monotonicity</b>   | 0.24    | 0.00    |  | 0.72    | 0.00    |
| <b>U_C_convexity</b>      | 0.22    | 0.00    |  | 0.66    | 0.00    |
| <b>U_S_symmetry</b>       | 0.32    | 0.00    |  | 0.96    | 0.00    |
| <b>J_R_rise</b>           | 0.02    | 0.00    |  | 0.07    | 0.00    |
| <b>J_M_monotonicity</b>   | 0.50    | 0.51    |  | 0.51    | 0.49    |
| <b>J_C_rightconvex</b>    | 0.46    | 0.47    |  | 0.54    | 0.38    |
| <b>P_turning</b>          | 0.03    | 0.06    |  | 0.00    | 0.03    |
| <b>final_structure</b>    | neither | neither |  | neither | neither |
| <b>U_supported</b>        | False   | 0.00    |  | 0.00    | 0.00    |
| <b>J_supported</b>        | False   | 0.00    |  | 0.00    | 0.00    |

Table S6eb. Sweden Cantril U-shape ratings, 2006-2024

| KPI                    | Mean    | 2005    | 2006 | 2007 | 2008  | 2009    | 2010 | 2011    | 2012  | 2013    | 2014    | 2015  | 2016    | 2017    | 2018    | 2019  | 2020    | 2021    | 2022 | 2023    | 2024    |
|------------------------|---------|---------|------|------|-------|---------|------|---------|-------|---------|---------|-------|---------|---------|---------|-------|---------|---------|------|---------|---------|
| <b>shape_class</b>     | neither | neither |      |      | U     | neither |      | neither | U     | neither | neither | U     | neither | neither | neither | U     | neither | neither |      | neither | neither |
| <b>U_beauty</b>        | 0.00    | 0.00    |      |      | 0.03  | 0.00    |      | 0.00    | 0.01  | 0.00    | 0.00    | 0.03  | 0.00    | 0.00    | 0.00    | 0.01  | 0.00    | 0.00    |      | 0.00    | 0.00    |
| <b>J_beauty</b>        | 0.00    | 0.00    |      |      | 0.00  | 0.00    |      | 0.00    | 0.00  | 0.00    | 0.00    | 0.00  | 0.00    | 0.00    | 0.00    | 0.00  | 0.00    | 0.00    |      | 0.00    | 0.00    |
| <b>Dominance</b>       | 0.04    |         |      |      | 0.93  |         |      | -1.00   | 0.94  |         |         | 0.85  |         | -1.00   |         | 0.54  |         |         |      | -1.00   |         |
| <b>best_df</b>         | 4.25    | 5.00    |      |      | 4.00  | 3.00    |      | 5.00    | 4.00  | 3.00    | 5.00    | 4.00  | 5.00    | 4.00    | 5.00    | 3.00  | 5.00    |         | 5.00 | 3.00    | 3.00    |
| <b>p_value</b>         | 0.00    | 0.00    |      |      | 0.00  | 0.00    |      | 0.00    | 0.00  | 0.00    | 0.00    | 0.00  | 0.00    | 0.00    | 0.00    | 0.00  | 0.00    |         | 0.00 | 0.00    | 0.00    |
| <b>lr_stat</b>         | 42.91   | 91.92   |      |      | 23.16 | 23.92   |      | 49.74   | 25.15 | 31.73   | 96.55   | 44.05 | 43.43   | 38.66   | 43.18   | 37.92 | 32.39   | 35.46   |      | 29.11   | 40.22   |
| <b>linear_aic</b>      | 18.70   | 50.47   |      |      | 8.13  | 12.66   |      | 18.34   | 5.20  | 17.64   | 29.01   | 18.63 | 26.42   | 12.19   | 15.47   | 18.77 | 11.86   | 21.97   |      | 14.65   | 17.84   |
| <b>spline_aic</b>      | -7.71   | -23.45  |      |      | 0.97  | 2.74    |      | -13.40  | -3.95 | -0.09   | -49.54  | -9.42 | 0.99    | -10.46  | -9.72   | -1.14 | -6.53   | 4.50    |      | 3.55    | -8.37   |
| <b>min_age</b>         | 56.58   |         |      |      | 83.17 |         |      | 20.76   | 81.29 |         |         | 80.16 |         | 21.14   | 88.80   | 27.34 | 86.92   | 88.24   |      | 21.14   | 23.39   |
| <b>min_value</b>       | 6.66    |         |      |      | 7.04  |         |      | 6.96    | 7.09  |         |         | 6.65  |         | 6.76    | 5.87    | 6.89  | 6.49    | 6.10    |      | 6.54    | 6.92    |
| <b>amplitude</b>       | 1.87    | 5.14    |      |      | 0.73  | 1.49    |      | 2.05    | 0.96  | 1.77    | 2.56    | 1.85  | 2.61    | 1.17    | 1.78    | 1.91  | 1.39    | 1.73    |      | 1.46    | 1.27    |
| <b>delta_endpoints</b> | -0.58   | -4.77   |      |      | 0.03  | -1.49   |      | 1.52    | 0.09  | -1.30   | -2.22   | 0.91  | -2.61   | 0.70    | -0.84   | 1.43  | -0.79   | -0.03   |      | 0.60    | -0.46   |

|                           |         |         |      |         |         |      |         |         |      |         |         |         |      |         |         |         |         |
|---------------------------|---------|---------|------|---------|---------|------|---------|---------|------|---------|---------|---------|------|---------|---------|---------|---------|
| <b>n_minima</b>           | 3.19    | 2.00    | 3.00 | 3.00    | 4.00    | 3.00 | 3.00    | 2.00    | 4.00 | 3.00    | 4.00    | 4.00    | 4.00 | 3.00    | 4.00    | 4.00    | 1.00    |
| <b>n_maxima</b>           | 2.75    | 2.00    | 2.00 | 3.00    | 3.00    | 4.00 | 3.00    | 2.00    | 3.00 | 3.00    | 3.00    | 3.00    | 4.00 | 2.00    | 3.00    | 3.00    | 1.00    |
| <b>turning_points</b>     | 5.94    | 4.00    | 5.00 | 6.00    | 7.00    | 7.00 | 6.00    | 4.00    | 7.00 | 6.00    | 7.00    | 7.00    | 8.00 | 5.00    | 7.00    | 7.00    | 2.00    |
| <b>r_trough</b>           | 0.68    | 1.00    | 0.88 | 1.00    | 0.05    | 0.86 | 1.00    | 1.00    | 0.84 | 1.00    | 0.06    | 0.96    | 0.14 | 0.93    | 0.95    | 0.06    | 0.09    |
| <b>interior_indicator</b> | False   | 0.00    | 1.00 | 0.00    | 0.00    | 1.00 | 0.00    | 0.00    | 1.00 | 0.00    | 0.00    | 0.00    | 1.00 | 0.00    | 0.00    | 0.00    | 0.00    |
| <b>trough_indicator</b>   | True    | 0.00    | 1.00 | 0.00    | 1.00    | 1.00 | 0.00    | 0.00    | 1.00 | 0.00    | 1.00    | 1.00    | 1.00 | 1.00    | 1.00    | 1.00    | 1.00    |
| <b>U_D_depth</b>          | 0.31    | 0.00    | 0.94 | 0.00    | 0.26    | 0.34 | 0.00    | 0.00    | 0.51 | 0.00    | 0.40    | 0.42    | 0.25 | 0.43    | 0.80    | 0.59    | 0.06    |
| <b>U_I_interiority</b>    | 0.02    | 0.00    | 0.04 | 0.00    | 0.00    | 0.11 | 0.00    | 0.00    | 0.14 | 0.00    | 0.00    | 0.00    | 0.09 | 0.00    | 0.00    | 0.00    | 0.00    |
| <b>U_M_monotonicity</b>   | 0.50    | 0.00    | 0.73 | 0.00    | 0.72    | 0.64 | 0.00    | 0.00    | 0.72 | 0.00    | 0.76    | 0.75    | 0.67 | 0.70    | 0.65    | 0.79    | 0.80    |
| <b>U_C_convexity</b>      | 0.51    | 0.00    | 1.00 | 0.00    | 0.68    | 0.68 | 0.00    | 0.00    | 0.77 | 0.00    | 0.74    | 0.70    | 0.61 | 0.87    | 0.70    | 0.65    | 0.78    |
| <b>U_S_symmetry</b>       | 0.45    | 0.00    | 0.98 | 0.00    | 0.41    | 0.88 | 0.00    | 0.00    | 0.67 | 0.00    | 0.57    | 0.64    | 0.40 | 0.60    | 0.99    | 0.74    | 0.24    |
| <b>J_R_rise</b>           | 0.20    | 0.00    | 0.04 | 0.00    | 0.74    | 0.09 | 0.00    | 0.00    | 0.49 | 0.00    | 0.60    | 0.00    | 0.75 | 0.00    | 0.00    | 0.41    | 0.00    |
| <b>J_M_monotonicity</b>   | 0.50    | 0.32    | 0.53 | 0.45    | 0.49    | 0.54 | 0.38    | 0.52    | 0.56 | 0.36    | 0.55    | 0.46    | 0.54 | 0.54    | 0.60    | 0.59    | 0.58    |
| <b>J_C_rightconvex</b>    | 0.54    | 0.17    | 0.92 | 0.49    | 0.59    | 0.54 | 0.41    | 0.33    | 0.61 | 0.55    | 0.76    | 0.47    | 0.63 | 0.58    | 0.48    | 0.75    | 0.42    |
| <b>P_turning</b>          | 0.07    | 0.12    | 0.06 | 0.03    | 0.01    | 0.01 | 0.03    | 0.12    | 0.01 | 0.03    | 0.01    | 0.01    | 0.01 | 0.06    | 0.01    | 0.01    | 0.50    |
| <b>final_structure</b>    | neither | neither | U    | neither | neither | U    | neither | neither | U    | neither | neither | neither | U    | neither | neither | neither | neither |
| <b>U_supported</b>        | False   | 0.00    | 1.00 | 0.00    | 0.00    | 1.00 | 0.00    | 0.00    | 1.00 | 0.00    | 0.00    | 0.00    | 1.00 | 0.00    | 0.00    | 0.00    | 0.00    |
| <b>J_supported</b>        | False   | 0.00    | 0.00 | 0.00    | 0.00    | 0.00 | 0.00    | 0.00    | 0.00 | 0.00    | 0.00    | 0.00    | 0.00 | 0.00    | 0.00    | 0.00    | 0.00    |

Table S6ec. Switzerland Cantril U-shape ratings, 2006-2024

| KPI                       | Mean    | 2005 | 2006    | 2007 | 2008 | 2009    | 2010 | 2011 | 2012  | 2013 | 2014    | 2015    | 2016    | 2017    | 2018  | 2019 | 2020    | 2021    | 2022  | 2023   | 2024    |
|---------------------------|---------|------|---------|------|------|---------|------|------|-------|------|---------|---------|---------|---------|-------|------|---------|---------|-------|--------|---------|
| <b>shape_class</b>        | neither |      | neither |      |      | neither |      |      | U     |      | neither | neither | neither | neither | U     |      | neither | neither | U     | U      | neither |
| <b>U_beauty</b>           | 0.04    | 0.00 |         |      |      | 0.00    |      |      | 0.03  |      | 0.00    | 0.00    | 0.00    | 0.00    | 0.01  |      | 0.00    | 0.00    | 0.26  | 0.17   | 0.00    |
| <b>J_beauty</b>           | 0.00    |      | 0.00    |      |      | 0.00    |      |      | 0.00  |      | 0.00    | 0.00    | 0.00    | 0.00    | 0.00  |      | 0.02    | 0.01    | 0.00  | 0.00   | 0.00    |
| <b>Dominance</b>          | 0.33    |      |         |      |      |         |      |      | 0.99  |      |         |         |         |         | 1.00  |      | -1.00   | -1.00   | 0.99  | 1.00   |         |
| <b>best_df</b>            | 4.54    |      | 5.00    |      |      | 4.00    |      |      | 5.00  |      | 3.00    | 5.00    | 4.00    | 5.00    | 5.00  |      | 5.00    | 3.00    | 5.00  | 5.00   | 5.00    |
| <b>p_value</b>            | 0.00    |      | 0.00    |      |      | 0.00    |      |      | 0.00  |      | 0.01    | 0.00    | 0.00    | 0.00    | 0.01  |      | 0.00    | 0.01    | 0.01  | 0.00   | 0.00    |
| <b>lr_stat</b>            | 44.53   |      | 60.70   |      |      | 41.15   |      |      | 23.75 |      | 19.71   | 44.73   | 51.00   | 71.71   | 22.78 |      | 82.86   | 17.59   | 22.25 | 68.74  | 51.90   |
| <b>linear_aic</b>         | 22.27   |      | 44.25   |      |      | 25.15   |      |      | 0.74  |      | -8.72   | 42.98   | 12.87   | 41.43   | -0.13 |      | 41.77   | 21.58   | 18.59 | 13.04  | 35.91   |
| <b>spline_aic</b>         | -5.19   |      | 1.55    |      |      | 0.01    |      |      | -5.01 |      | -14.43  | 16.24   | -22.13  | -12.28  | -4.92 |      | -23.10  | 17.99   | 14.34 | -37.70 | 2.01    |
| <b>min_age</b>            | 52.95   |      |         |      |      |         |      |      | 27.34 |      |         |         |         |         | 83.73 |      |         |         | 46.51 | 54.22  |         |
| <b>min_value</b>          | 6.91    |      |         |      |      |         |      |      | 7.40  |      |         |         |         |         | 6.94  |      |         |         | 6.55  | 6.75   |         |
| <b>amplitude</b>          | 2.16    |      | 3.87    |      |      | 2.18    |      |      | 0.72  |      | 0.89    | 4.33    | 1.43    | 3.83    | 0.82  |      | 2.85    | 1.83    | 1.19  | 1.50   | 2.65    |
| <b>delta_endpoints</b>    | -1.02   |      | -3.69   |      |      | -2.17   |      |      | 0.05  |      | -0.89   | -4.33   | -0.91   | -3.81   | 0.01  |      | 1.50    | 1.83    | 0.17  | 0.02   | -1.01   |
| <b>n_minima</b>           | 3.00    |      | 3.00    |      |      | 2.00    |      |      | 4.00  |      | 2.00    | 3.00    | 2.00    | 3.00    | 4.00  |      | 2.00    | 3.00    | 4.00  | 4.00   | 3.00    |
| <b>n_maxima</b>           | 3.15    |      | 3.00    |      |      | 2.00    |      |      | 4.00  |      | 2.00    | 3.00    | 3.00    | 4.00    | 4.00  |      | 2.00    | 3.00    | 3.00  | 4.00   | 4.00    |
| <b>turning_points</b>     | 6.15    |      | 6.00    |      |      | 4.00    |      |      | 8.00  |      | 4.00    | 6.00    | 5.00    | 7.00    | 8.00  |      | 4.00    | 6.00    | 7.00  | 8.00   | 7.00    |
| <b>r_trough</b>           | 0.69    |      | 1.00    |      |      | 1.00    |      |      | 0.14  |      | 1.00    | 1.00    | 1.00    | 1.00    | 0.89  |      | 0.00    | 0.00    | 0.39  | 0.50   | 1.00    |
| <b>interior_indicator</b> | False   |      | 0.00    |      |      | 0.00    |      |      | 1.00  |      | 0.00    | 0.00    | 0.00    | 0.00    | 1.00  |      | 0.00    | 0.00    | 1.00  | 1.00   | 0.00    |
| <b>trough_indicator</b>   | False   |      | 0.00    |      |      | 0.00    |      |      | 1.00  |      | 0.00    | 0.00    | 0.00    | 0.00    | 1.00  |      | 0.00    | 0.00    | 1.00  | 1.00   | 0.00    |
| <b>U_D_depth</b>          | 0.21    |      | 0.00    |      |      | 0.00    |      |      | 0.78  |      | 0.00    | 0.00    | 0.00    | 0.00    | 0.68  |      | 0.00    | 0.00    | 0.86  | 0.37   | 0.00    |
| <b>U_I_interiority</b>    | 0.14    |      | 0.00    |      |      | 0.00    |      |      | 0.09  |      | 0.00    | 0.00    | 0.00    | 0.00    | 0.03  |      | 0.00    | 0.00    | 0.73  | 0.99   | 0.00    |
| <b>U_M_monotonicity</b>   | 0.21    |      | 0.00    |      |      | 0.00    |      |      | 0.66  |      | 0.00    | 0.00    | 0.00    | 0.00    | 0.74  |      | 0.00    | 0.00    | 0.64  | 0.67   | 0.00    |
| <b>U_C_convexity</b>      | 0.33    |      | 0.00    |      |      | 0.00    |      |      | 0.65  |      | 0.83    | 0.00    | 0.00    | 0.00    | 0.85  |      | 0.00    | 0.00    | 0.71  | 0.68   | 0.58    |

|                         |         |         |         |      |         |         |         |         |      |         |         |      |      |         |
|-------------------------|---------|---------|---------|------|---------|---------|---------|---------|------|---------|---------|------|------|---------|
| <b>U_S_symmetry</b>     | 0.30    | 0.00    | 0.00    | 0.96 | 0.00    | 0.00    | 0.00    | 0.00    | 0.99 | 0.00    | 0.00    | 0.92 | 0.99 | 0.00    |
| <b>J_R_rise</b>         | 0.13    | 0.00    | 0.00    | 0.06 | 0.00    | 0.00    | 0.00    | 0.00    | 0.01 | 0.53    | 1.00    | 0.14 | 0.01 | 0.00    |
| <b>J_M_monotonicity</b> | 0.49    | 0.57    | 0.58    | 0.46 | 0.33    | 0.41    | 0.47    | 0.41    | 0.51 | 0.59    | 0.49    | 0.54 | 0.56 | 0.52    |
| <b>J_C_rightconvex</b>  | 0.42    | 0.36    | 0.52    | 0.44 | 0.84    | 0.00    | 0.00    | 0.26    | 0.67 | 0.41    | 0.53    | 0.56 | 0.53 | 0.38    |
| <b>P_turning</b>        | 0.05    | 0.03    | 0.12    | 0.01 | 0.12    | 0.03    | 0.06    | 0.01    | 0.01 | 0.12    | 0.03    | 0.01 | 0.01 | 0.01    |
| <b>final_structure</b>  | neither | neither | neither | U    | neither | neither | neither | neither | U    | neither | neither | U    | U    | neither |
| <b>U_supported</b>      | False   | 0.00    | 0.00    | 1.00 | 0.00    | 0.00    | 0.00    | 0.00    | 1.00 | 0.00    | 0.00    | 1.00 | 1.00 | 0.00    |
| <b>J_supported</b>      | False   | 0.00    | 0.00    | 0.00 | 0.00    | 0.00    | 0.00    | 0.00    | 0.00 | 0.00    | 0.00    | 0.00 | 0.00 | 0.00    |

Table S6ed. Syria Cantril U-shape ratings, 2006-2024

| KPI                       | Mean    | 2005 | 2006 | 2007 | 2008 | 2009 | 2010 | 2011    | 2012    | 2013  | 2014 | 2015 | 2016 | 2017 | 2018 | 2019 | 2020 | 2021 | 2022 | 2023 | 2024 |
|---------------------------|---------|------|------|------|------|------|------|---------|---------|-------|------|------|------|------|------|------|------|------|------|------|------|
| <b>shape_class</b>        | neither |      |      |      |      |      |      | neither | neither | U     |      |      |      |      |      |      |      |      |      |      |      |
| <b>U_beauty</b>           | 0.00    |      |      |      |      |      |      | 0.00    | 0.00    | 0.00  |      |      |      |      |      |      |      |      |      |      |      |
| <b>J_beauty</b>           | 0.00    |      |      |      |      |      |      | 0.00    | 0.00    | 0.00  |      |      |      |      |      |      |      |      |      |      |      |
| <b>Dominance</b>          | 0.06    |      |      |      |      |      |      |         |         | 0.06  |      |      |      |      |      |      |      |      |      |      |      |
| <b>best_df</b>            | 4.33    |      |      |      |      |      |      | 5.00    | 4.00    | 4.00  |      |      |      |      |      |      |      |      |      |      |      |
| <b>p_value</b>            | 0.01    |      |      |      |      |      |      | 0.00    | 0.01    | 0.00  |      |      |      |      |      |      |      |      |      |      |      |
| <b>lr_stat</b>            | 23.75   |      |      |      |      |      |      | 25.63   | 19.52   | 26.11 |      |      |      |      |      |      |      |      |      |      |      |
| <b>linear_aic</b>         | 15.68   |      |      |      |      |      |      | 20.26   | 4.95    | 21.83 |      |      |      |      |      |      |      |      |      |      |      |
| <b>spline_aic</b>         | 8.59    |      |      |      |      |      |      | 12.62   | 1.43    | 11.72 |      |      |      |      |      |      |      |      |      |      |      |
| <b>min_age</b>            | 86.55   |      |      |      |      |      |      |         | 88.80   | 84.29 |      |      |      |      |      |      |      |      |      |      |      |
| <b>min_value</b>          | 2.27    |      |      |      |      |      |      |         | 2.59    | 1.94  |      |      |      |      |      |      |      |      |      |      |      |
| <b>amplitude</b>          | 1.44    |      |      |      |      |      |      | 1.97    | 0.96    | 1.38  |      |      |      |      |      |      |      |      |      |      |      |
| <b>delta_endpoints</b>    | -0.52   |      |      |      |      |      |      | -1.39   | -0.41   | 0.24  |      |      |      |      |      |      |      |      |      |      |      |
| <b>n_minima</b>           | 3.67    |      |      |      |      |      |      | 4.00    | 4.00    | 3.00  |      |      |      |      |      |      |      |      |      |      |      |
| <b>n_maxima</b>           | 3.67    |      |      |      |      |      |      | 5.00    | 4.00    | 2.00  |      |      |      |      |      |      |      |      |      |      |      |
| <b>turning_points</b>     | 7.33    |      |      |      |      |      |      | 9.00    | 8.00    | 5.00  |      |      |      |      |      |      |      |      |      |      |      |
| <b>r_trough</b>           | 0.95    |      |      |      |      |      |      | 1.00    | 0.96    | 0.90  |      |      |      |      |      |      |      |      |      |      |      |
| <b>interior_indicator</b> | False   |      |      |      |      |      |      | 0.00    | 0.00    | 1.00  |      |      |      |      |      |      |      |      |      |      |      |
| <b>trough_indicator</b>   | True    |      |      |      |      |      |      | 0.00    | 1.00    | 1.00  |      |      |      |      |      |      |      |      |      |      |      |
| <b>U_D_depth</b>          | 0.39    |      |      |      |      |      |      | 0.00    | 0.33    | 0.82  |      |      |      |      |      |      |      |      |      |      |      |
| <b>U_I_interiority</b>    | 0.00    |      |      |      |      |      |      | 0.00    | 0.00    | 0.01  |      |      |      |      |      |      |      |      |      |      |      |
| <b>U_M_monotonicity</b>   | 0.52    |      |      |      |      |      |      | 0.00    | 0.76    | 0.80  |      |      |      |      |      |      |      |      |      |      |      |
| <b>U_C_convexity</b>      | 0.47    |      |      |      |      |      |      | 0.00    | 0.74    | 0.67  |      |      |      |      |      |      |      |      |      |      |      |
| <b>U_S_symmetry</b>       | 0.50    |      |      |      |      |      |      | 0.00    | 0.61    | 0.90  |      |      |      |      |      |      |      |      |      |      |      |
| <b>J_R_rise</b>           | 0.06    |      |      |      |      |      |      | 0.00    | 0.00    | 0.18  |      |      |      |      |      |      |      |      |      |      |      |
| <b>J_M_monotonicity</b>   | 0.47    |      |      |      |      |      |      | 0.52    | 0.46    | 0.43  |      |      |      |      |      |      |      |      |      |      |      |
| <b>J_C_rightconvex</b>    | 0.56    |      |      |      |      |      |      | 0.44    | 0.50    | 0.74  |      |      |      |      |      |      |      |      |      |      |      |
| <b>P_turning</b>          | 0.02    |      |      |      |      |      |      | 0.00    | 0.01    | 0.06  |      |      |      |      |      |      |      |      |      |      |      |
| <b>final_structure</b>    | neither |      |      |      |      |      |      | neither | neither | U     |      |      |      |      |      |      |      |      |      |      |      |
| <b>U_supported</b>        | False   |      |      |      |      |      |      | 0.00    | 0.00    | 1.00  |      |      |      |      |      |      |      |      |      |      |      |
| <b>J_supported</b>        | False   |      |      |      |      |      |      | 0.00    | 0.00    | 0.00  |      |      |      |      |      |      |      |      |      |      |      |

Table S6ee. Taiwan Cantril U-shape ratings, 2006-2024

| KPI                | Mean    | 2005 | 2006 | 2007 | 2008 | 2009 | 2010    | 2011 | 2012  | 2013    | 2014    | 2015 | 2016    | 2017  | 2018 | 2019    | 2020 | 2021    | 2022 | 2023 | 2024 |
|--------------------|---------|------|------|------|------|------|---------|------|-------|---------|---------|------|---------|-------|------|---------|------|---------|------|------|------|
| shape_class        | neither |      |      |      |      |      | neither |      | U     | neither | neither |      | neither | U     |      | neither |      | neither |      |      |      |
| U_beauty           | 0.03    |      |      |      |      |      | 0.00    |      | 0.08  | 0.00    | 0.00    |      | 0.00    | 0.14  |      | 0.00    |      | 0.00    |      |      |      |
| J_beauty           | 0.00    |      |      |      |      |      | 0.00    |      | 0.01  | 0.00    | 0.00    |      | 0.00    | 0.00  |      | 0.02    |      | 0.00    |      |      |      |
| Dominance          | 0.28    |      |      |      |      |      |         |      | 0.85  |         |         |      |         | 1.00  |      | -1.00   |      |         |      |      |      |
| best_df            | 4.25    |      |      |      |      |      | 3.00    |      | 4.00  | 5.00    | 5.00    |      | 5.00    | 3.00  |      | 5.00    |      | 4.00    |      |      |      |
| p_value            | 0.00    |      |      |      |      |      | 0.01    |      | 0.00  | 0.00    | 0.00    |      | 0.00    | 0.00  |      | 0.00    |      | 0.00    |      |      |      |
| lr_stat            | 43.89   |      |      |      |      |      | 18.86   |      | 46.89 | 58.45   | 58.20   |      | 36.66   | 37.66 |      | 60.33   |      | 34.10   |      |      |      |
| linear_aic         | 32.21   |      |      |      |      |      | 16.43   |      | 41.62 | 48.89   | 11.38   |      | 21.75   | 29.43 |      | 52.60   |      | 35.58   |      |      |      |
| spline_aic         | 4.82    |      |      |      |      |      | 11.57   |      | 10.73 | 8.44    | -28.83  |      | 3.09    | 5.77  |      | 10.28   |      | 17.48   |      |      |      |
| min_age            | 83.65   |      |      |      |      |      |         |      | 77.90 | 88.24   | 88.05   |      |         | 77.15 |      | 86.92   |      |         |      |      |      |
| min_value          | 4.48    |      |      |      |      |      |         |      | 5.28  | 2.23    | 5.54    |      |         | 5.27  |      | 4.08    |      |         |      |      |      |
| amplitude          | 3.10    |      |      |      |      |      | 1.50    |      | 3.34  | 5.19    | 1.46    |      | 2.10    | 2.20  |      | 5.92    |      | 3.11    |      |      |      |
| delta_endpoints    | -0.24   |      |      |      |      |      | -1.50   |      | 1.09  | -0.18   | -0.01   |      | -1.85   | -0.23 |      | 2.97    |      | -2.23   |      |      |      |
| n_minima           | 3.00    |      |      |      |      |      | 2.00    |      | 2.00  | 4.00    | 4.00    |      | 4.00    | 3.00  |      | 2.00    |      | 3.00    |      |      |      |
| n_maxima           | 3.00    |      |      |      |      |      | 2.00    |      | 2.00  | 4.00    | 3.00    |      | 5.00    | 3.00  |      | 2.00    |      | 3.00    |      |      |      |
| turning_points     | 6.00    |      |      |      |      |      | 4.00    |      | 4.00  | 8.00    | 7.00    |      | 9.00    | 6.00  |      | 4.00    |      | 6.00    |      |      |      |
| r_trough           | 0.93    |      |      |      |      |      | 1.00    |      | 0.81  | 0.95    | 0.95    |      | 1.00    | 0.80  |      | 0.93    |      | 1.00    |      |      |      |
| interior_indicator | False   |      |      |      |      |      | 0.00    |      | 1.00  | 0.00    | 0.00    |      | 0.00    | 1.00  |      | 0.00    |      | 0.00    |      |      |      |
| trough_indicator   | True    |      |      |      |      |      | 0.00    |      | 1.00  | 1.00    | 1.00    |      | 0.00    | 1.00  |      | 1.00    |      | 0.00    |      |      |      |
| U_D_depth          | 0.49    |      |      |      |      |      | 0.00    |      | 0.59  | 0.92    | 1.00    |      | 0.00    | 0.90  |      | 0.50    |      | 0.00    |      |      |      |
| U_I_interiority    | 0.06    |      |      |      |      |      | 0.00    |      | 0.22  | 0.00    | 0.00    |      | 0.00    | 0.24  |      | 0.00    |      | 0.00    |      |      |      |
| U_M_monotonicity   | 0.49    |      |      |      |      |      | 0.00    |      | 0.83  | 0.78    | 0.78    |      | 0.00    | 0.78  |      | 0.76    |      | 0.00    |      |      |      |
| U_C_convexity      | 0.46    |      |      |      |      |      | 0.00    |      | 0.78  | 0.67    | 0.67    |      | 0.00    | 0.87  |      | 0.67    |      | 0.00    |      |      |      |
| U_S_symmetry       | 0.55    |      |      |      |      |      | 0.00    |      | 0.78  | 0.98    | 1.00    |      | 0.00    | 0.95  |      | 0.66    |      | 0.00    |      |      |      |
| J_R_rise           | 0.10    |      |      |      |      |      | 0.00    |      | 0.33  | 0.00    | 0.00    |      | 0.00    | 0.00  |      | 0.50    |      | 0.00    |      |      |      |
| J_M_monotonicity   | 0.43    |      |      |      |      |      | 0.53    |      | 0.33  | 0.42    | 0.43    |      | 0.47    | 0.42  |      | 0.46    |      | 0.38    |      |      |      |
| J_C_rightconvex    | 0.50    |      |      |      |      |      | 0.47    |      | 0.61  | 0.51    | 0.49    |      | 0.39    | 0.57  |      | 0.46    |      | 0.53    |      |      |      |
| P_turning          | 0.06    |      |      |      |      |      | 0.12    |      | 0.12  | 0.01    | 0.01    |      | 0.00    | 0.03  |      | 0.12    |      | 0.03    |      |      |      |
| final_structure    | neither |      |      |      |      |      | neither |      | U     | neither | neither |      | neither | U     |      | neither |      | neither |      |      |      |
| U_supported        | False   |      |      |      |      |      | 0.00    |      | 1.00  | 0.00    | 0.00    |      | 0.00    | 1.00  |      | 0.00    |      | 0.00    |      |      |      |
| J_supported        | False   |      |      |      |      |      | 0.00    |      | 0.00  | 0.00    | 0.00    |      | 0.00    | 0.00  |      | 0.00    |      | 0.00    |      |      |      |

Table S6ef. Tajikistan Cantril U-shape ratings, 2006-2024

| KPI         | Mean | 2005 | 2006 | 2007 | 2008    | 2009 | 2010    | 2011 | 2012 | 2013    | 2014 | 2015 | 2016 | 2017 | 2018 | 2019 | 2020 | 2021 | 2022    | 2023 | 2024 |
|-------------|------|------|------|------|---------|------|---------|------|------|---------|------|------|------|------|------|------|------|------|---------|------|------|
| shape_class | U    |      |      |      | neither |      | neither | U    | U    | neither |      |      |      | U    |      |      | U    |      | neither |      |      |
| U_beauty    | 0.01 |      |      |      | 0.00    |      | 0.00    | 0.05 | 0.01 | 0.00    |      |      |      |      | 0.00 |      | 0.00 |      | 0.00    |      |      |
| J_beauty    | 0.00 |      |      |      | 0.00    |      | 0.00    | 0.03 | 0.00 | 0.00    |      |      |      |      | 0.00 |      | 0.00 |      | 0.00    |      |      |
| Dominance   | 0.80 |      |      |      |         |      |         | 0.20 | 1.00 |         |      |      |      |      | 1.00 |      | 1.00 |      |         |      |      |
| best_df     | 3.75 |      |      |      | 3.00    |      | 3.00    | 4.00 | 4.00 | 5.00    |      |      |      |      | 5.00 |      | 3.00 |      | 3.00    |      |      |

|                           |       |         |         |       |       |         |       |       |         |      |
|---------------------------|-------|---------|---------|-------|-------|---------|-------|-------|---------|------|
| <b>p_value</b>            | 0.02  | 0.00    | 0.00    | 0.00  | 0.00  | 0.00    | 0.00  | 0.15  | 0.00    | 0.00 |
| <b>lr_stat</b>            | 36.41 | 22.41   | 42.51   | 68.11 | 34.62 | 41.63   | 13.25 | 37.16 | 31.61   |      |
| <b>linear_aic</b>         | 17.76 | 0.73    | 8.12    | 46.99 | 17.80 | 23.25   | -0.42 | 13.86 | 31.71   |      |
| <b>spline_aic</b>         | -3.16 | -7.68   | -20.39  | -5.11 | -0.82 | -0.38   | 4.33  | -9.30 | 14.11   |      |
| <b>min_age</b>            | 80.35 | 86.55   |         | 71.51 | 76.59 |         | 83.17 | 77.34 | 86.92   |      |
| <b>min_value</b>          | 3.85  | 4.27    |         | 3.54  | 3.79  |         | 4.80  | 3.87  | 2.81    |      |
| <b>amplitude</b>          | 2.16  | 1.20    | 1.62    | 4.47  | 1.70  | 2.19    | 1.27  | 1.71  | 3.11    |      |
| <b>delta_endpoints</b>    | -0.49 | -0.46   | -1.62   | 3.45  | -0.66 | -2.13   | -0.85 | -1.32 | -0.33   |      |
| <b>n_minima</b>           | 2.75  | 3.00    | 2.00    | 2.00  | 3.00  | 3.00    | 4.00  | 3.00  | 2.00    |      |
| <b>n_maxima</b>           | 2.88  | 2.00    | 2.00    | 2.00  | 3.00  | 3.00    | 5.00  | 4.00  | 2.00    |      |
| <b>turning_points</b>     | 5.63  | 5.00    | 4.00    | 4.00  | 6.00  | 6.00    | 9.00  | 7.00  | 4.00    |      |
| <b>r_trough</b>           | 0.88  | 0.93    | 1.00    | 0.73  | 0.79  | 1.00    | 0.88  | 0.80  | 0.93    |      |
| <b>interior_indicator</b> | False | 0.00    | 0.00    | 1.00  | 1.00  | 0.00    | 1.00  | 1.00  | 0.00    |      |
| <b>trough_indicator</b>   | True  | 1.00    | 0.00    | 1.00  | 1.00  | 0.00    | 1.00  | 1.00  | 1.00    |      |
| <b>U_D_depth</b>          | 0.24  | 0.62    | 0.00    | 0.23  | 0.13  | 0.00    | 0.16  | 0.07  | 0.71    |      |
| <b>U_I_interiority</b>    | 0.12  | 0.00    | 0.00    | 0.43  | 0.26  | 0.00    | 0.04  | 0.24  | 0.00    |      |
| <b>U_M_monotonicity</b>   | 0.59  | 0.89    | 0.00    | 0.84  | 0.71  | 0.00    | 0.70  | 0.71  | 0.86    |      |
| <b>U_C_convexity</b>      | 0.59  | 0.77    | 0.00    | 0.95  | 0.76  | 0.00    | 0.62  | 0.82  | 0.82    |      |
| <b>U_S_symmetry</b>       | 0.37  | 0.76    | 0.00    | 0.37  | 0.40  | 0.00    | 0.33  | 0.16  | 0.93    |      |
| <b>J_R_rise</b>           | 0.10  | 0.00    | 0.00    | 0.77  | 0.00  | 0.00    | 0.00  | 0.00  | 0.00    |      |
| <b>J_M_monotonicity</b>   | 0.36  | 0.26    | 0.32    | 0.49  | 0.39  | 0.34    | 0.45  | 0.34  | 0.31    |      |
| <b>J_C_rightconvex</b>    | 0.52  | 0.53    | 0.46    | 0.84  | 0.54  | 0.22    | 0.49  | 0.50  | 0.55    |      |
| <b>P_turning</b>          | 0.06  | 0.06    | 0.12    | 0.12  | 0.03  | 0.03    | 0.00  | 0.01  | 0.12    |      |
| <b>final_structure</b>    | U     | neither | neither | U     | U     | neither | U     | U     | neither |      |
| <b>U_supported</b>        | False | 0.00    | 0.00    | 1.00  | 1.00  | 0.00    | 1.00  | 1.00  | 0.00    |      |
| <b>J_supported</b>        | False | 0.00    | 0.00    | 0.00  | 0.00  | 0.00    | 0.00  | 0.00  | 0.00    |      |

Table S6eg. Tanzania Cantril U-shape ratings, 2006-2024

| KPI                    | Mean  | 2005 | 2006 | 2007 | 2008 | 2009 | 2010  | 2011 | 2012 | 2013 | 2014 | 2015 | 2016 | 2017    | 2018    | 2019 | 2020 | 2021 | 2022  | 2023 | 2024 |
|------------------------|-------|------|------|------|------|------|-------|------|------|------|------|------|------|---------|---------|------|------|------|-------|------|------|
| <b>shape_class</b>     | U     |      |      |      |      |      | U     |      |      |      |      |      |      | neither | neither |      |      |      | U     |      |      |
| <b>U_beauty</b>        | 0.02  |      |      |      |      |      | 0.01  |      |      |      |      |      |      | 0.00    | 0.00    |      |      |      | 0.06  |      |      |
| <b>J_beauty</b>        | 0.00  |      |      |      |      |      | 0.00  |      |      |      |      |      |      | 0.00    | 0.00    |      |      |      | 0.00  |      |      |
| <b>Dominance</b>       | 0.97  |      |      |      |      |      | 0.95  |      |      |      |      |      |      |         |         |      |      |      | 1.00  |      |      |
| <b>best_df</b>         | 4.25  |      |      |      |      |      | 5.00  |      |      |      |      |      |      | 4.00    | 3.00    |      |      |      | 5.00  |      |      |
| <b>p_value</b>         | 0.04  |      |      |      |      |      | 0.00  |      |      |      |      |      |      | 0.00    | 0.17    |      |      |      | 0.00  |      |      |
| <b>lr_stat</b>         | 29.43 |      |      |      |      |      | 35.86 |      |      |      |      |      |      | 44.45   | 10.44   |      |      |      | 26.96 |      |      |
| <b>linear_aic</b>      | 39.73 |      |      |      |      |      | 40.61 |      |      |      |      |      |      | 31.19   | 36.21   |      |      |      | 50.92 |      |      |
| <b>spline_aic</b>      | 26.81 |      |      |      |      |      | 22.75 |      |      |      |      |      |      | 2.74    | 39.78   |      |      |      | 41.96 |      |      |
| <b>min_age</b>         | 80.66 |      |      |      |      |      | 80.72 |      |      |      |      |      |      |         | 90.31   |      |      |      | 70.95 |      |      |
| <b>min_value</b>       | 1.90  |      |      |      |      |      | 1.63  |      |      |      |      |      |      |         | 2.01    |      |      |      | 2.05  |      |      |
| <b>amplitude</b>       | 3.49  |      |      |      |      |      | 4.20  |      |      |      |      |      |      | 2.91    | 2.54    |      |      |      | 4.32  |      |      |
| <b>delta_endpoints</b> | -1.30 |      |      |      |      |      | 1.19  |      |      |      |      |      |      | -2.77   | -2.42   |      |      |      | -1.18 |      |      |
| <b>n_minima</b>        | 4.00  |      |      |      |      |      | 4.00  |      |      |      |      |      |      | 3.00    | 4.00    |      |      |      | 5.00  |      |      |
| <b>n_maxima</b>        | 3.75  |      |      |      |      |      | 5.00  |      |      |      |      |      |      | 3.00    | 3.00    |      |      |      | 4.00  |      |      |

|                           |       |      |         |         |      |
|---------------------------|-------|------|---------|---------|------|
| <b>turning_points</b>     | 7.75  | 9.00 | 6.00    | 7.00    | 9.00 |
| <b>r_trough</b>           | 0.89  | 0.85 | 1.00    | 0.98    | 0.72 |
| <b>interior_indicator</b> | True  | 1.00 | 0.00    | 0.00    | 1.00 |
| <b>trough_indicator</b>   | True  | 1.00 | 0.00    | 1.00    | 1.00 |
| <b>U_D_depth</b>          | 0.19  | 0.40 | 0.00    | 0.05    | 0.33 |
| <b>U_I_interiority</b>    | 0.14  | 0.13 | 0.00    | 0.00    | 0.45 |
| <b>U_M_monotonicity</b>   | 0.51  | 0.58 | 0.00    | 0.78    | 0.68 |
| <b>U_C_convexity</b>      | 0.55  | 0.61 | 0.00    | 0.88    | 0.71 |
| <b>U_S_symmetry</b>       | 0.38  | 0.74 | 0.00    | 0.09    | 0.71 |
| <b>J_R_rise</b>           | 0.07  | 0.28 | 0.00    | 0.00    | 0.00 |
| <b>J_M_monotonicity</b>   | 0.44  | 0.60 | 0.42    | 0.41    | 0.33 |
| <b>J_C_rightconvex</b>    | 0.47  | 0.48 | 0.48    | 0.43    | 0.49 |
| <b>P_turning</b>          | 0.01  | 0.00 | 0.03    | 0.01    | 0.00 |
| <b>final_structure</b>    | U     | U    | neither | neither | U    |
| <b>U_supported</b>        | True  | 1.00 | 0.00    | 0.00    | 1.00 |
| <b>J_supported</b>        | False | 0.00 | 0.00    | 0.00    | 0.00 |

Table S6eh. Thailand Cantril U-shape ratings, 2006-2024

| KPI                       | Mean  | 2005 | 2006 | 2007 | 2008 | 2009 | 2010 | 2011 | 2012    | 2013 | 2014 | 2015    | 2016  | 2017 | 2018  | 2019 | 2020 | 2021 | 2022    | 2023  | 2024 |
|---------------------------|-------|------|------|------|------|------|------|------|---------|------|------|---------|-------|------|-------|------|------|------|---------|-------|------|
| <b>shape_class</b>        | U     |      |      |      |      |      |      |      | neither |      |      | neither | U     |      | U     |      |      |      | neither | U     |      |
| <b>U_beauty</b>           | 0.13  |      |      |      |      |      |      |      | 0.00    |      |      | 0.00    | 0.03  |      | 0.59  |      |      |      | 0.00    | 0.16  |      |
| <b>J_beauty</b>           | 0.00  |      |      |      |      |      |      |      | 0.00    |      |      | 0.00    | 0.00  |      | 0.00  |      |      |      | 0.00    | 0.02  |      |
| <b>Dominance</b>          | 0.94  |      |      |      |      |      |      |      |         |      |      |         | 0.99  |      | 1.00  |      |      |      |         | 0.82  |      |
| <b>best_df</b>            | 4.67  |      |      |      |      |      |      |      | 5.00    |      |      | 5.00    | 5.00  |      | 3.00  |      |      |      | 5.00    | 5.00  |      |
| <b>p_value</b>            | 0.00  |      |      |      |      |      |      |      | 0.00    |      |      | 0.00    | 0.00  |      | 0.00  |      |      |      | 0.00    | 0.00  |      |
| <b>lr_stat</b>            | 38.78 |      |      |      |      |      |      |      | 34.62   |      |      | 28.66   | 52.81 |      | 26.33 |      |      |      | 25.99   | 64.28 |      |
| <b>linear_aic</b>         | 29.47 |      |      |      |      |      |      |      | 14.19   |      |      | 2.95    | 47.50 |      | 26.62 |      |      |      | 37.34   | 48.19 |      |
| <b>spline_aic</b>         | 8.02  |      |      |      |      |      |      |      | -2.43   |      |      | -7.72   | 12.69 |      | 14.29 |      |      |      | 29.35   | 1.91  |      |
| <b>min_age</b>            | 75.12 |      |      |      |      |      |      |      |         |      |      | 91.81   | 79.41 |      | 56.29 |      |      |      | 89.37   | 58.73 |      |
| <b>min_value</b>          | 5.25  |      |      |      |      |      |      |      |         |      |      | 5.50    | 4.98  |      | 5.21  |      |      |      | 4.79    | 5.77  |      |
| <b>amplitude</b>          | 2.72  |      |      |      |      |      |      |      | 1.72    |      |      | 1.40    | 4.72  |      | 1.62  |      |      |      | 2.65    | 4.23  |      |
| <b>delta_endpoints</b>    | -0.12 |      |      |      |      |      |      |      | -1.60   |      |      | -1.40   | 0.94  |      | -0.12 |      |      |      | -1.37   | 2.80  |      |
| <b>n_minima</b>           | 3.50  |      |      |      |      |      |      |      | 4.00    |      |      | 4.00    | 4.00  |      | 3.00  |      |      |      | 4.00    | 2.00  |      |
| <b>n_maxima</b>           | 3.33  |      |      |      |      |      |      |      | 5.00    |      |      | 3.00    | 5.00  |      | 2.00  |      |      |      | 3.00    | 2.00  |      |
| <b>turning_points</b>     | 6.83  |      |      |      |      |      |      |      | 9.00    |      |      | 7.00    | 9.00  |      | 5.00  |      |      |      | 7.00    | 4.00  |      |
| <b>r_trough</b>           | 0.81  |      |      |      |      |      |      |      | 1.00    |      |      | 1.00    | 0.83  |      | 0.52  |      |      |      | 0.96    | 0.56  |      |
| <b>interior_indicator</b> | False |      |      |      |      |      |      |      | 0.00    |      |      | 0.00    | 1.00  |      | 1.00  |      |      |      | 0.00    | 1.00  |      |
| <b>trough_indicator</b>   | True  |      |      |      |      |      |      |      | 0.00    |      |      | 1.00    | 1.00  |      | 1.00  |      |      |      | 1.00    | 1.00  |      |
| <b>U_D_depth</b>          | 0.36  |      |      |      |      |      |      |      | 0.00    |      |      | 0.00    | 0.44  |      | 0.93  |      |      |      | 0.45    | 0.34  |      |
| <b>U_I_interiority</b>    | 0.33  |      |      |      |      |      |      |      | 0.00    |      |      | 0.00    | 0.17  |      | 0.94  |      |      |      | 0.00    | 0.86  |      |
| <b>U_M_monotonicity</b>   | 0.67  |      |      |      |      |      |      |      | 0.00    |      |      | 0.77    | 0.72  |      | 0.78  |      |      |      | 0.81    | 0.92  |      |
| <b>U_C_convexity</b>      | 0.64  |      |      |      |      |      |      |      | 0.00    |      |      | 0.73    | 0.65  |      | 1.00  |      |      |      | 0.65    | 0.81  |      |
| <b>U_S_symmetry</b>       | 0.49  |      |      |      |      |      |      |      | 0.00    |      |      | 0.00    | 0.82  |      | 0.96  |      |      |      | 0.64    | 0.51  |      |
| <b>J_R_rise</b>           | 0.14  |      |      |      |      |      |      |      | 0.00    |      |      | 0.00    | 0.20  |      | 0.00  |      |      |      | 0.00    | 0.66  |      |

|                         |       |         |         |      |      |         |      |
|-------------------------|-------|---------|---------|------|------|---------|------|
| <b>J_M_monotonicity</b> | 0.40  | 0.45    | 0.41    | 0.41 | 0.39 | 0.37    | 0.38 |
| <b>J_C_rightconvex</b>  | 0.50  | 0.39    | 0.44    | 0.51 | 0.59 | 0.53    | 0.56 |
| <b>P_turning</b>        | 0.04  | 0.00    | 0.01    | 0.00 | 0.06 | 0.01    | 0.12 |
| <b>final_structure</b>  | U     | neither | neither | U    | U    | neither | U    |
| <b>U_supported</b>      | False | 0.00    | 0.00    | 1.00 | 1.00 | 0.00    | 1.00 |
| <b>J_supported</b>      | False | 0.00    | 0.00    | 0.00 | 0.00 | 0.00    | 0.00 |

Table S6ei. Togo Cantril U-shape ratings, 2006-2024

| KPI                       | Mean    | 2005 | 2006 | 2007 | 2008 | 2009 | 2010 | 2011    | 2012 | 2013 | 2014 | 2015  | 2016    | 2017 | 2018 | 2019 | 2020 | 2021 | 2022 | 2023 | 2024 |
|---------------------------|---------|------|------|------|------|------|------|---------|------|------|------|-------|---------|------|------|------|------|------|------|------|------|
| <b>shape_class</b>        | neither |      |      |      |      |      |      | neither |      |      |      | U     | neither |      |      |      |      |      |      |      |      |
| <b>U_beauty</b>           | 0.05    |      |      |      |      |      |      | 0.00    |      |      |      | 0.16  | 0.00    |      |      |      |      |      |      |      |      |
| <b>J_beauty</b>           | 0.00    |      |      |      |      |      |      | 0.00    |      |      |      | 0.00  | 0.00    |      |      |      |      |      |      |      |      |
| <b>Dominance</b>          | 1.00    |      |      |      |      |      |      |         |      |      |      | 1.00  |         |      |      |      |      |      |      |      |      |
| <b>best_df</b>            | 4.33    |      |      |      |      |      |      | 3.00    |      |      |      | 5.00  | 5.00    |      |      |      |      |      |      |      |      |
| <b>p_value</b>            | 0.00    |      |      |      |      |      |      | 0.00    |      |      |      | 0.00  | 0.01    |      |      |      |      |      |      |      |      |
| <b>lr_stat</b>            | 38.61   |      |      |      |      |      |      | 43.11   |      |      |      | 49.35 | 23.37   |      |      |      |      |      |      |      |      |
| <b>linear_aic</b>         | 37.13   |      |      |      |      |      |      | 38.44   |      |      |      | 31.67 | 41.29   |      |      |      |      |      |      |      |      |
| <b>spline_aic</b>         | 15.19   |      |      |      |      |      |      | 9.33    |      |      |      | 0.32  | 35.92   |      |      |      |      |      |      |      |      |
| <b>min_age</b>            | 63.99   |      |      |      |      |      |      |         |      |      |      | 63.99 |         |      |      |      |      |      |      |      |      |
| <b>min_value</b>          | 2.81    |      |      |      |      |      |      |         |      |      |      | 2.81  |         |      |      |      |      |      |      |      |      |
| <b>amplitude</b>          | 3.22    |      |      |      |      |      |      | 3.72    |      |      |      | 2.91  | 3.02    |      |      |      |      |      |      |      |      |
| <b>delta_endpoints</b>    | -1.61   |      |      |      |      |      |      | -2.81   |      |      |      | 0.08  | -2.09   |      |      |      |      |      |      |      |      |
| <b>n_minima</b>           | 3.33    |      |      |      |      |      |      | 3.00    |      |      |      | 4.00  | 3.00    |      |      |      |      |      |      |      |      |
| <b>n_maxima</b>           | 4.00    |      |      |      |      |      |      | 4.00    |      |      |      | 4.00  | 4.00    |      |      |      |      |      |      |      |      |
| <b>turning_points</b>     | 7.33    |      |      |      |      |      |      | 7.00    |      |      |      | 8.00  | 7.00    |      |      |      |      |      |      |      |      |
| <b>r_trough</b>           | 0.88    |      |      |      |      |      |      | 1.00    |      |      |      | 0.63  | 1.00    |      |      |      |      |      |      |      |      |
| <b>interior_indicator</b> | False   |      |      |      |      |      |      | 0.00    |      |      |      | 1.00  | 0.00    |      |      |      |      |      |      |      |      |
| <b>trough_indicator</b>   | False   |      |      |      |      |      |      | 0.00    |      |      |      | 1.00  | 0.00    |      |      |      |      |      |      |      |      |
| <b>U_D_depth</b>          | 0.18    |      |      |      |      |      |      | 0.00    |      |      |      | 0.55  | 0.00    |      |      |      |      |      |      |      |      |
| <b>U_I_interiority</b>    | 0.23    |      |      |      |      |      |      | 0.00    |      |      |      | 0.68  | 0.00    |      |      |      |      |      |      |      |      |
| <b>U_M_monotonicity</b>   | 0.22    |      |      |      |      |      |      | 0.00    |      |      |      | 0.65  | 0.00    |      |      |      |      |      |      |      |      |
| <b>U_C_convexity</b>      | 0.34    |      |      |      |      |      |      | 0.00    |      |      |      | 0.68  | 0.33    |      |      |      |      |      |      |      |      |
| <b>U_S_symmetry</b>       | 0.33    |      |      |      |      |      |      | 0.00    |      |      |      | 0.98  | 0.00    |      |      |      |      |      |      |      |      |
| <b>J_R_rise</b>           | 0.01    |      |      |      |      |      |      | 0.00    |      |      |      | 0.03  | 0.00    |      |      |      |      |      |      |      |      |
| <b>J_M_monotonicity</b>   | 0.45    |      |      |      |      |      |      | 0.41    |      |      |      | 0.49  | 0.43    |      |      |      |      |      |      |      |      |
| <b>J_C_rightconvex</b>    | 0.41    |      |      |      |      |      |      | 0.43    |      |      |      | 0.44  | 0.37    |      |      |      |      |      |      |      |      |
| <b>P_turning</b>          | 0.01    |      |      |      |      |      |      | 0.01    |      |      |      | 0.01  | 0.01    |      |      |      |      |      |      |      |      |
| <b>final_structure</b>    | neither |      |      |      |      |      |      | neither |      |      |      | U     | neither |      |      |      |      |      |      |      |      |
| <b>U_supported</b>        | False   |      |      |      |      |      |      | 0.00    |      |      |      | 1.00  | 0.00    |      |      |      |      |      |      |      |      |
| <b>J_supported</b>        | False   |      |      |      |      |      |      | 0.00    |      |      |      | 0.00  | 0.00    |      |      |      |      |      |      |      |      |

Table S6ej. Trinidad and Tobago Cantril U-shape ratings, 2006-2024

| KPI                | Mean    | 2005 | 2006 | 2007 | 2008 | 2009 | 2010 | 2011    | 2012 | 2013    | 2014 | 2015 | 2016 | 2017 | 2018 | 2019 | 2020 | 2021 | 2022 | 2023 | 2024 |  |
|--------------------|---------|------|------|------|------|------|------|---------|------|---------|------|------|------|------|------|------|------|------|------|------|------|--|
| shape_class        | neither |      |      |      |      |      |      | neither |      | neither |      |      |      |      |      |      |      |      |      |      |      |  |
| U_beauty           | 0.00    |      |      |      |      |      |      | 0.00    |      | 0.00    |      |      |      |      |      |      |      |      |      |      |      |  |
| J_beauty           | 0.00    |      |      |      |      |      |      | 0.00    |      | 0.00    |      |      |      |      |      |      |      |      |      |      |      |  |
| Dominance          | -1.00   |      |      |      |      |      |      |         |      | -1.00   |      |      |      |      |      |      |      |      |      |      |      |  |
| best_df            | 4.00    |      |      |      |      |      |      | 3.00    |      | 5.00    |      |      |      |      |      |      |      |      |      |      |      |  |
| p_value            | 0.08    |      |      |      |      |      |      | 0.16    |      | 0.00    |      |      |      |      |      |      |      |      |      |      |      |  |
| lr_stat            | 20.37   |      |      |      |      |      |      | 10.59   |      | 30.16   |      |      |      |      |      |      |      |      |      |      |      |  |
| linear_aic         | 57.00   |      |      |      |      |      |      | 50.37   |      | 63.63   |      |      |      |      |      |      |      |      |      |      |      |  |
| spline_aic         | 52.63   |      |      |      |      |      |      | 53.78   |      | 51.47   |      |      |      |      |      |      |      |      |      |      |      |  |
| min_age            | 87.86   |      |      |      |      |      |      |         |      | 87.86   |      |      |      |      |      |      |      |      |      |      |      |  |
| min_value          | 1.10    |      |      |      |      |      |      |         |      | 1.10    |      |      |      |      |      |      |      |      |      |      |      |  |
| amplitude          | 5.68    |      |      |      |      |      |      | 3.50    |      | 7.86    |      |      |      |      |      |      |      |      |      |      |      |  |
| delta_endpoints    | 0.11    |      |      |      |      |      |      | -2.08   |      | 2.30    |      |      |      |      |      |      |      |      |      |      |      |  |
| n_minima           | 3.00    |      |      |      |      |      |      | 2.00    |      | 4.00    |      |      |      |      |      |      |      |      |      |      |      |  |
| n_maxima           | 2.50    |      |      |      |      |      |      | 2.00    |      | 3.00    |      |      |      |      |      |      |      |      |      |      |      |  |
| turning_points     | 5.50    |      |      |      |      |      |      | 4.00    |      | 7.00    |      |      |      |      |      |      |      |      |      |      |      |  |
| r_trough           | 0.97    |      |      |      |      |      |      | 1.00    |      | 0.94    |      |      |      |      |      |      |      |      |      |      |      |  |
| interior_indicator | False   |      |      |      |      |      |      | 0.00    |      | 0.00    |      |      |      |      |      |      |      |      |      |      |      |  |
| trough_indicator   | False   |      |      |      |      |      |      | 0.00    |      | 1.00    |      |      |      |      |      |      |      |      |      |      |      |  |
| U_D_depth          | 0.35    |      |      |      |      |      |      | 0.00    |      | 0.71    |      |      |      |      |      |      |      |      |      |      |      |  |
| U_I_interiority    | 0.00    |      |      |      |      |      |      | 0.00    |      | 0.00    |      |      |      |      |      |      |      |      |      |      |      |  |
| U_M_monotonicity   | 0.33    |      |      |      |      |      |      | 0.00    |      | 0.67    |      |      |      |      |      |      |      |      |      |      |      |  |
| U_C_convexity      | 0.33    |      |      |      |      |      |      | 0.00    |      | 0.66    |      |      |      |      |      |      |      |      |      |      |      |  |
| U_S_symmetry       | 0.41    |      |      |      |      |      |      | 0.00    |      | 0.83    |      |      |      |      |      |      |      |      |      |      |      |  |
| J_R_rise           | 0.15    |      |      |      |      |      |      | 0.00    |      | 0.29    |      |      |      |      |      |      |      |      |      |      |      |  |
| J_M_monotonicity   | 0.59    |      |      |      |      |      |      | 0.60    |      | 0.58    |      |      |      |      |      |      |      |      |      |      |      |  |
| J_C_rightconvex    | 0.47    |      |      |      |      |      |      | 0.40    |      | 0.54    |      |      |      |      |      |      |      |      |      |      |      |  |
| P_turning          | 0.07    |      |      |      |      |      |      | 0.12    |      | 0.01    |      |      |      |      |      |      |      |      |      |      |      |  |
| final_structure    | neither |      |      |      |      |      |      | neither |      | neither |      |      |      |      |      |      |      |      |      |      |      |  |
| U_supported        | False   |      |      |      |      |      |      | 0.00    |      | 0.00    |      |      |      |      |      |      |      |      |      |      |      |  |
| J_supported        | False   |      |      |      |      |      |      | 0.00    |      | 0.00    |      |      |      |      |      |      |      |      |      |      |      |  |

Table S6ek. Tunisia Cantril U-shape ratings, 2006-2024

| KPI         | Mean    | 2005 | 2006 | 2007 | 2008 | 2009 | 2010 | 2011 | 2012 | 2013 | 2014    | 2015 | 2016    | 2017    | 2018    | 2019 | 2020 | 2021    | 2022 | 2023 | 2024 | All |
|-------------|---------|------|------|------|------|------|------|------|------|------|---------|------|---------|---------|---------|------|------|---------|------|------|------|-----|
| shape_class | neither |      |      |      |      |      |      |      |      |      | neither |      | neither | neither | neither |      |      | neither | U    |      | U    |     |
| U_beauty    | 0.02    |      |      |      |      |      |      |      |      |      | 0.00    |      | 0.00    | 0.00    | 0.00    |      |      | 0.00    | 0.05 |      | 0.10 |     |
| J_beauty    | 0.00    |      |      |      |      |      |      |      |      |      | 0.00    |      | 0.00    | 0.00    | 0.00    |      |      | 0.00    | 0.00 |      | 0.00 |     |
| Dominance   | 0.99    |      |      |      |      |      |      |      |      |      |         |      |         |         |         |      |      |         | 0.99 |      | 1.00 |     |
| best_df     | 4.00    |      |      |      |      |      |      |      |      |      | 5.00    |      | 5.00    | 3.00    | 3.00    |      |      | 5.00    | 4.00 |      | 3.00 |     |
| p_value     | 0.03    |      |      |      |      |      |      |      |      |      | 0.00    |      | 0.00    | 0.00    | 0.15    |      |      | 0.00    | 0.01 |      | 0.02 |     |

|                           |         |  |  |  |  |  |  |  |  |         |         |         |         |  |  |  |  |         |       |       |
|---------------------------|---------|--|--|--|--|--|--|--|--|---------|---------|---------|---------|--|--|--|--|---------|-------|-------|
| <b>lr_stat</b>            | 33.53   |  |  |  |  |  |  |  |  | 50.98   | 34.79   | 28.25   | 10.80   |  |  |  |  | 71.97   | 21.63 | 16.27 |
| <b>linear_aic</b>         | 27.49   |  |  |  |  |  |  |  |  | 36.06   | 34.95   | 21.42   | 29.59   |  |  |  |  | 45.99   | 16.70 | 7.75  |
| <b>spline_aic</b>         | 9.97    |  |  |  |  |  |  |  |  | 3.08    | 18.17   | 7.17    | 32.79   |  |  |  |  | -7.98   | 11.07 | 5.47  |
| <b>min_age</b>            | 78.56   |  |  |  |  |  |  |  |  |         |         |         |         |  |  |  |  |         | 79.78 | 77.34 |
| <b>min_value</b>          | 4.07    |  |  |  |  |  |  |  |  |         |         |         |         |  |  |  |  |         | 3.85  | 4.29  |
| <b>amplitude</b>          | 2.78    |  |  |  |  |  |  |  |  | 3.79    | 3.06    | 3.28    | 2.07    |  |  |  |  | 4.99    | 1.28  | 1.00  |
| <b>delta_endpoints</b>    | -2.09   |  |  |  |  |  |  |  |  | -3.67   | -2.15   | -3.28   | -2.07   |  |  |  |  | -3.51   | 0.26  | -0.18 |
| <b>n_minima</b>           | 3.14    |  |  |  |  |  |  |  |  | 3.00    | 3.00    | 3.00    | 3.00    |  |  |  |  | 4.00    | 4.00  | 2.00  |
| <b>n_maxima</b>           | 3.43    |  |  |  |  |  |  |  |  | 4.00    | 3.00    | 3.00    | 3.00    |  |  |  |  | 4.00    | 4.00  | 3.00  |
| <b>turning_points</b>     | 6.57    |  |  |  |  |  |  |  |  | 7.00    | 6.00    | 6.00    | 6.00    |  |  |  |  | 8.00    | 8.00  | 5.00  |
| <b>r_trough</b>           | 0.95    |  |  |  |  |  |  |  |  | 1.00    | 1.00    | 1.00    | 1.00    |  |  |  |  | 1.00    | 0.84  | 0.80  |
| <b>interior_indicator</b> | False   |  |  |  |  |  |  |  |  | 0.00    | 0.00    | 0.00    | 0.00    |  |  |  |  | 0.00    | 1.00  | 1.00  |
| <b>trough_indicator</b>   | False   |  |  |  |  |  |  |  |  | 0.00    | 0.00    | 0.00    | 0.00    |  |  |  |  | 0.00    | 1.00  | 1.00  |
| <b>U_D_depth</b>          | 0.20    |  |  |  |  |  |  |  |  | 0.00    | 0.00    | 0.00    | 0.00    |  |  |  |  | 0.00    | 0.69  | 0.71  |
| <b>U_I_interiority</b>    | 0.06    |  |  |  |  |  |  |  |  | 0.00    | 0.00    | 0.00    | 0.00    |  |  |  |  | 0.00    | 0.16  | 0.24  |
| <b>U_M_monotonicity</b>   | 0.21    |  |  |  |  |  |  |  |  | 0.00    | 0.00    | 0.00    | 0.00    |  |  |  |  | 0.00    | 0.72  | 0.75  |
| <b>U_C_convexity</b>      | 0.24    |  |  |  |  |  |  |  |  | 0.00    | 0.00    | 0.00    | 0.00    |  |  |  |  | 0.00    | 0.72  | 0.95  |
| <b>U_S_symmetry</b>       | 0.25    |  |  |  |  |  |  |  |  | 0.00    | 0.00    | 0.00    | 0.00    |  |  |  |  | 0.00    | 0.87  | 0.89  |
| <b>J_R_rise</b>           | 0.03    |  |  |  |  |  |  |  |  | 0.00    | 0.00    | 0.00    | 0.00    |  |  |  |  | 0.00    | 0.20  | 0.00  |
| <b>J_M_monotonicity</b>   | 0.41    |  |  |  |  |  |  |  |  | 0.38    | 0.37    | 0.28    | 0.45    |  |  |  |  | 0.46    | 0.46  | 0.45  |
| <b>J_C_rightconvex</b>    | 0.43    |  |  |  |  |  |  |  |  | 0.40    | 0.45    | 0.54    | 0.04    |  |  |  |  | 0.46    | 0.57  | 0.57  |
| <b>P_turning</b>          | 0.03    |  |  |  |  |  |  |  |  | 0.01    | 0.03    | 0.03    | 0.03    |  |  |  |  | 0.01    | 0.01  | 0.06  |
| <b>final_structure</b>    | neither |  |  |  |  |  |  |  |  | neither | neither | neither | neither |  |  |  |  | neither | U     | U     |
| <b>U_supported</b>        | False   |  |  |  |  |  |  |  |  | 0.00    | 0.00    | 0.00    | 0.00    |  |  |  |  | 0.00    | 1.00  | 1.00  |
| <b>J_supported</b>        | False   |  |  |  |  |  |  |  |  | 0.00    | 0.00    | 0.00    | 0.00    |  |  |  |  | 0.00    | 0.00  | 0.00  |

Table S6el. Turkey Cantril U-shape ratings, 2006-2024

| KPI                    | Mean  | 2005    | 2006 | 2007 | 2008 | 2009 | 2010 | 2011 | 2012 | 2013  | 2014 | 2015 | 2016 | 2017 | 2018 | 2019 | 2020 | 2021 | 2022 | 2023 | 2024 |  |
|------------------------|-------|---------|------|------|------|------|------|------|------|-------|------|------|------|------|------|------|------|------|------|------|------|--|
| <b>shape_class</b>     | U     | neither |      |      |      |      |      |      |      | U     |      |      |      |      |      |      |      |      |      |      |      |  |
| <b>U_beauty</b>        | 0.05  | 0.00    |      |      |      |      |      |      |      | 0.11  |      |      |      |      |      |      |      |      |      |      |      |  |
| <b>J_beauty</b>        | 0.01  | 0.00    |      |      |      |      |      |      |      | 0.01  |      |      |      |      |      |      |      |      |      |      |      |  |
| <b>Dominance</b>       | -0.11 | -1.00   |      |      |      |      |      |      |      | 0.78  |      |      |      |      |      |      |      |      |      |      |      |  |
| <b>best_df</b>         | 5.00  | 5.00    |      |      |      |      |      |      |      | 5.00  |      |      |      |      |      |      |      |      |      |      |      |  |
| <b>p_value</b>         | 0.00  | 0.00    |      |      |      |      |      |      |      | 0.00  |      |      |      |      |      |      |      |      |      |      |      |  |
| <b>lr_stat</b>         | 68.03 | 69.30   |      |      |      |      |      |      |      | 66.75 |      |      |      |      |      |      |      |      |      |      |      |  |
| <b>linear_aic</b>      | 53.37 | 53.68   |      |      |      |      |      |      |      | 53.06 |      |      |      |      |      |      |      |      |      |      |      |  |
| <b>spline_aic</b>      | 3.34  | 2.38    |      |      |      |      |      |      |      | 4.31  |      |      |      |      |      |      |      |      |      |      |      |  |
| <b>min_age</b>         | 77.34 | 86.74   |      |      |      |      |      |      |      | 67.94 |      |      |      |      |      |      |      |      |      |      |      |  |
| <b>min_value</b>       | 3.01  | 2.06    |      |      |      |      |      |      |      | 3.97  |      |      |      |      |      |      |      |      |      |      |      |  |
| <b>amplitude</b>       | 5.48  | 5.94    |      |      |      |      |      |      |      | 5.02  |      |      |      |      |      |      |      |      |      |      |      |  |
| <b>delta_endpoints</b> | 3.00  | 2.56    |      |      |      |      |      |      |      | 3.45  |      |      |      |      |      |      |      |      |      |      |      |  |
| <b>n_minima</b>        | 3.00  | 4.00    |      |      |      |      |      |      |      | 2.00  |      |      |      |      |      |      |      |      |      |      |      |  |
| <b>n_maxima</b>        | 2.50  | 3.00    |      |      |      |      |      |      |      | 2.00  |      |      |      |      |      |      |      |      |      |      |      |  |
| <b>turning_points</b>  | 5.50  | 7.00    |      |      |      |      |      |      |      | 4.00  |      |      |      |      |      |      |      |      |      |      |      |  |

|                           |       |         |      |
|---------------------------|-------|---------|------|
| <b>r_trough</b>           | 0.80  | 0.93    | 0.68 |
| <b>interior_indicator</b> | False | 0.00    | 1.00 |
| <b>trough_indicator</b>   | True  | 1.00    | 1.00 |
| <b>U_D_depth</b>          | 0.44  | 0.57    | 0.31 |
| <b>U_I_interiority</b>    | 0.28  | 0.00    | 0.55 |
| <b>U_M_monotonicity</b>   | 0.85  | 0.77    | 0.93 |
| <b>U_C_convexity</b>      | 0.84  | 0.68    | 1.00 |
| <b>U_S_symmetry</b>       | 0.60  | 0.73    | 0.48 |
| <b>J_R_rise</b>           | 0.56  | 0.43    | 0.69 |
| <b>J_M_monotonicity</b>   | 0.39  | 0.45    | 0.33 |
| <b>J_C_rightconvex</b>    | 0.54  | 0.46    | 0.62 |
| <b>P_turning</b>          | 0.07  | 0.01    | 0.12 |
| <b>final_structure</b>    | U     | neither | U    |
| <b>U_supported</b>        | False | 0.00    | 1.00 |
| <b>J_supported</b>        | False | 0.00    | 0.00 |

Table S6em. Turkmenistan Cantril U-shape ratings, 2006-2024

| KPI                       | Mean    | 2005 | 2006 | 2007 | 2008 | 2009 | 2010 | 2011 | 2012    | 2013 | 2014 | 2015 | 2016 | 2017 | 2018 | 2019 | 2020 | 2021 | 2022 | 2023 | 2024 |
|---------------------------|---------|------|------|------|------|------|------|------|---------|------|------|------|------|------|------|------|------|------|------|------|------|
| <b>shape_class</b>        | neither |      |      |      |      |      |      |      | neither |      |      |      |      |      |      |      |      |      |      |      |      |
| <b>U_beauty</b>           | 0.00    |      |      |      |      |      |      |      | 0.00    |      |      |      |      |      |      |      |      |      |      |      |      |
| <b>J_beauty</b>           | 0.00    |      |      |      |      |      |      |      | 0.00    |      |      |      |      |      |      |      |      |      |      |      |      |
| <b>Dominance</b>          |         |      |      |      |      |      |      |      |         |      |      |      |      |      |      |      |      |      |      |      |      |
| <b>best_df</b>            | 5.00    |      |      |      |      |      |      |      | 5.00    |      |      |      |      |      |      |      |      |      |      |      |      |
| <b>p_value</b>            | 0.51    |      |      |      |      |      |      |      | 0.51    |      |      |      |      |      |      |      |      |      |      |      |      |
| <b>lr_stat</b>            | 8.23    |      |      |      |      |      |      |      | 8.23    |      |      |      |      |      |      |      |      |      |      |      |      |
| <b>linear_aic</b>         | 42.32   |      |      |      |      |      |      |      | 42.32   |      |      |      |      |      |      |      |      |      |      |      |      |
| <b>spline_aic</b>         | 52.09   |      |      |      |      |      |      |      | 52.09   |      |      |      |      |      |      |      |      |      |      |      |      |
| <b>min_age</b>            | 90.31   |      |      |      |      |      |      |      | 90.31   |      |      |      |      |      |      |      |      |      |      |      |      |
| <b>min_value</b>          | 4.63    |      |      |      |      |      |      |      | 4.63    |      |      |      |      |      |      |      |      |      |      |      |      |
| <b>amplitude</b>          | 2.21    |      |      |      |      |      |      |      | 2.21    |      |      |      |      |      |      |      |      |      |      |      |      |
| <b>delta_endpoints</b>    | -0.42   |      |      |      |      |      |      |      | -0.42   |      |      |      |      |      |      |      |      |      |      |      |      |
| <b>n_minima</b>           | 5.00    |      |      |      |      |      |      |      | 5.00    |      |      |      |      |      |      |      |      |      |      |      |      |
| <b>n_maxima</b>           | 4.00    |      |      |      |      |      |      |      | 4.00    |      |      |      |      |      |      |      |      |      |      |      |      |
| <b>turning_points</b>     | 9.00    |      |      |      |      |      |      |      | 9.00    |      |      |      |      |      |      |      |      |      |      |      |      |
| <b>r_trough</b>           | 0.98    |      |      |      |      |      |      |      | 0.98    |      |      |      |      |      |      |      |      |      |      |      |      |
| <b>interior_indicator</b> | False   |      |      |      |      |      |      |      | 0.00    |      |      |      |      |      |      |      |      |      |      |      |      |
| <b>trough_indicator</b>   | True    |      |      |      |      |      |      |      | 1.00    |      |      |      |      |      |      |      |      |      |      |      |      |
| <b>U_D_depth</b>          | 0.15    |      |      |      |      |      |      |      | 0.15    |      |      |      |      |      |      |      |      |      |      |      |      |
| <b>U_I_interiority</b>    | 0.00    |      |      |      |      |      |      |      | 0.00    |      |      |      |      |      |      |      |      |      |      |      |      |
| <b>U_M_monotonicity</b>   | 0.68    |      |      |      |      |      |      |      | 0.68    |      |      |      |      |      |      |      |      |      |      |      |      |
| <b>U_C_convexity</b>      | 0.65    |      |      |      |      |      |      |      | 0.65    |      |      |      |      |      |      |      |      |      |      |      |      |
| <b>U_S_symmetry</b>       | 0.61    |      |      |      |      |      |      |      | 0.61    |      |      |      |      |      |      |      |      |      |      |      |      |
| <b>J_R_rise</b>           | 0.00    |      |      |      |      |      |      |      | 0.00    |      |      |      |      |      |      |      |      |      |      |      |      |
| <b>J_M_monotonicity</b>   | 0.55    |      |      |      |      |      |      |      | 0.55    |      |      |      |      |      |      |      |      |      |      |      |      |

|                        |         |         |
|------------------------|---------|---------|
| <b>J_C_rightconvex</b> | 0.53    | 0.53    |
| <b>P_turning</b>       | 0.00    | 0.00    |
| <b>final_structure</b> | neither | neither |
| <b>U_supported</b>     | False   | 0.00    |
| <b>J_supported</b>     | False   | 0.00    |

Table S6en. Uganda Cantril U-shape ratings, 2006-2024

| KPI                       | Mean    | 2005 | 2006 | 2007 | 2008 | 2009 | 2010 | 2011 | 2012 | 2013    | 2014    | 2015 | 2016 | 2017 | 2018 | 2019 | 2020 | 2021 | 2022 | 2023 | 2024 |  |
|---------------------------|---------|------|------|------|------|------|------|------|------|---------|---------|------|------|------|------|------|------|------|------|------|------|--|
| <b>shape_class</b>        | neither |      |      |      |      |      |      |      |      | neither | neither |      |      |      |      |      |      |      |      |      |      |  |
| <b>U_beauty</b>           | 0.00    |      |      |      |      |      |      |      |      | 0.00    | 0.00    |      |      |      |      |      |      |      |      |      |      |  |
| <b>J_beauty</b>           | 0.00    |      |      |      |      |      |      |      |      | 0.00    | 0.00    |      |      |      |      |      |      |      |      |      |      |  |
| <b>Dominance</b>          | -1.00   |      |      |      |      |      |      |      |      |         | -1.00   |      |      |      |      |      |      |      |      |      |      |  |
| <b>best_df</b>            | 4.50    |      |      |      |      |      |      |      |      | 4.00    | 5.00    |      |      |      |      |      |      |      |      |      |      |  |
| <b>p_value</b>            | 0.00    |      |      |      |      |      |      |      |      | 0.01    | 0.00    |      |      |      |      |      |      |      |      |      |      |  |
| <b>lr_stat</b>            | 36.43   |      |      |      |      |      |      |      |      | 20.54   | 52.32   |      |      |      |      |      |      |      |      |      |      |  |
| <b>linear_aic</b>         | 35.42   |      |      |      |      |      |      |      |      | 11.24   | 59.61   |      |      |      |      |      |      |      |      |      |      |  |
| <b>spline_aic</b>         | 15.99   |      |      |      |      |      |      |      |      | 6.70    | 25.29   |      |      |      |      |      |      |      |      |      |      |  |
| <b>min_age</b>            | 86.74   |      |      |      |      |      |      |      |      |         | 86.74   |      |      |      |      |      |      |      |      |      |      |  |
| <b>min_value</b>          | 2.11    |      |      |      |      |      |      |      |      |         | 2.11    |      |      |      |      |      |      |      |      |      |      |  |
| <b>amplitude</b>          | 4.47    |      |      |      |      |      |      |      |      | 2.07    | 6.88    |      |      |      |      |      |      |      |      |      |      |  |
| <b>delta_endpoints</b>    | 1.64    |      |      |      |      |      |      |      |      | -1.95   | 5.24    |      |      |      |      |      |      |      |      |      |      |  |
| <b>n_minima</b>           | 3.50    |      |      |      |      |      |      |      |      | 3.00    | 4.00    |      |      |      |      |      |      |      |      |      |      |  |
| <b>n_maxima</b>           | 3.00    |      |      |      |      |      |      |      |      | 3.00    | 3.00    |      |      |      |      |      |      |      |      |      |      |  |
| <b>turning_points</b>     | 6.50    |      |      |      |      |      |      |      |      | 6.00    | 7.00    |      |      |      |      |      |      |      |      |      |      |  |
| <b>r_trough</b>           | 0.96    |      |      |      |      |      |      |      |      | 1.00    | 0.93    |      |      |      |      |      |      |      |      |      |      |  |
| <b>interior_indicator</b> | False   |      |      |      |      |      |      |      |      | 0.00    | 0.00    |      |      |      |      |      |      |      |      |      |      |  |
| <b>trough_indicator</b>   | False   |      |      |      |      |      |      |      |      | 0.00    | 1.00    |      |      |      |      |      |      |      |      |      |      |  |
| <b>U_D_depth</b>          | 0.12    |      |      |      |      |      |      |      |      | 0.00    | 0.24    |      |      |      |      |      |      |      |      |      |      |  |
| <b>U_I_interiority</b>    | 0.00    |      |      |      |      |      |      |      |      | 0.00    | 0.00    |      |      |      |      |      |      |      |      |      |      |  |
| <b>U_M_monotonicity</b>   | 0.37    |      |      |      |      |      |      |      |      | 0.00    | 0.73    |      |      |      |      |      |      |      |      |      |      |  |
| <b>U_C_convexity</b>      | 0.32    |      |      |      |      |      |      |      |      | 0.00    | 0.65    |      |      |      |      |      |      |      |      |      |      |  |
| <b>U_S_symmetry</b>       | 0.19    |      |      |      |      |      |      |      |      | 0.00    | 0.39    |      |      |      |      |      |      |      |      |      |      |  |
| <b>J_R_rise</b>           | 0.38    |      |      |      |      |      |      |      |      | 0.00    | 0.76    |      |      |      |      |      |      |      |      |      |      |  |
| <b>J_M_monotonicity</b>   | 0.45    |      |      |      |      |      |      |      |      | 0.40    | 0.50    |      |      |      |      |      |      |      |      |      |      |  |
| <b>J_C_rightconvex</b>    | 0.28    |      |      |      |      |      |      |      |      | 0.00    | 0.55    |      |      |      |      |      |      |      |      |      |      |  |
| <b>P_turning</b>          | 0.02    |      |      |      |      |      |      |      |      | 0.03    | 0.01    |      |      |      |      |      |      |      |      |      |      |  |
| <b>final_structure</b>    | neither |      |      |      |      |      |      |      |      | neither | neither |      |      |      |      |      |      |      |      |      |      |  |
| <b>U_supported</b>        | False   |      |      |      |      |      |      |      |      | 0.00    | 0.00    |      |      |      |      |      |      |      |      |      |      |  |
| <b>J_supported</b>        | False   |      |      |      |      |      |      |      |      | 0.00    | 0.00    |      |      |      |      |      |      |      |      |      |      |  |

Table S6eo. Ukraine Cantril U-shape ratings, 2006-2024

| KPI                       | Mean    | 2005 | 2006    | 2007 | 2008 | 2009 | 2010  | 2011    | 2012    | 2013  | 2014 | 2015    | 2016    | 2017    | 2018    | 2019  | 2020    | 2021 | 2022 | 2023 | 2024 |
|---------------------------|---------|------|---------|------|------|------|-------|---------|---------|-------|------|---------|---------|---------|---------|-------|---------|------|------|------|------|
| <b>shape_class</b>        | neither |      | neither |      |      |      | U     | neither | neither | U     |      |         | neither | neither | neither | U     | neither |      |      |      |      |
| <b>U_beauty</b>           | 0.01    |      | 0.00    |      |      |      | 0.06  | 0.00    | 0.00    | 0.07  |      | 0.00    | 0.00    | 0.00    | 0.00    | 0.01  | 0.00    |      |      |      |      |
| <b>J_beauty</b>           | 0.00    |      | 0.00    |      |      |      | 0.00  | 0.00    | 0.00    | 0.00  |      | 0.00    | 0.00    | 0.00    | 0.00    | 0.00  | 0.00    |      |      |      |      |
| <b>Dominance</b>          | 0.49    |      |         |      |      |      | 0.95  |         | -1.00   | 1.00  |      |         |         |         |         | 1.00  |         |      |      |      |      |
| <b>best_df</b>            | 4.64    |      | 5.00    |      |      |      | 5.00  | 5.00    | 5.00    | 5.00  |      | 4.00    | 3.00    | 5.00    | 5.00    | 5.00  | 4.00    |      |      |      |      |
| <b>p_value</b>            | 0.00    |      | 0.00    |      |      |      | 0.00  | 0.00    | 0.00    | 0.00  |      | 0.00    | 0.00    | 0.00    | 0.00    | 0.00  | 0.00    |      |      |      |      |
| <b>lr_stat</b>            | 48.58   |      | 49.28   |      |      |      | 57.52 | 41.22   | 70.25   | 40.92 |      | 59.36   | 36.82   | 45.17   | 38.10   | 41.22 | 54.55   |      |      |      |      |
| <b>linear_aic</b>         | 29.63   |      | 51.47   |      |      |      | 39.74 | 22.90   | 42.48   | 14.82 |      | 30.00   | 26.45   | 21.47   | 29.49   | 16.44 | 30.65   |      |      |      |      |
| <b>spline_aic</b>         | -1.68   |      | 20.19   |      |      |      | 0.22  | -0.33   | -9.77   | -8.10 |      | -13.36  | 3.62    | -5.70   | 9.39    | -6.78 | -7.90   |      |      |      |      |
| <b>min_age</b>            | 81.17   |      |         |      |      |      | 79.41 |         | 86.92   | 72.26 |      | 85.05   |         |         |         | 82.23 |         |      |      |      |      |
| <b>min_value</b>          | 3.08    |      |         |      |      |      | 3.56  |         | 2.70    | 3.52  |      | 2.37    |         |         |         | 3.22  |         |      |      |      |      |
| <b>amplitude</b>          | 3.95    |      | 5.95    |      |      |      | 3.44  | 4.29    | 3.79    | 2.12  |      | 2.71    | 5.11    | 2.89    | 5.60    | 2.78  | 4.72    |      |      |      |      |
| <b>delta_endpoints</b>    | -2.60   |      | -4.79   |      |      |      | 1.31  | -4.29   | 0.39    | -1.14 |      | -0.02   | -4.92   | -2.89   | -5.60   | -1.96 | -4.70   |      |      |      |      |
| <b>n_minima</b>           | 3.27    |      | 4.00    |      |      |      | 4.00  | 4.00    | 4.00    | 5.00  |      | 3.00    | 1.00    | 2.00    | 3.00    | 4.00  | 2.00    |      |      |      |      |
| <b>n_maxima</b>           | 3.09    |      | 4.00    |      |      |      | 3.00  | 4.00    | 3.00    | 4.00  |      | 3.00    | 2.00    | 2.00    | 3.00    | 3.00  | 3.00    |      |      |      |      |
| <b>turning_points</b>     | 6.36    |      | 8.00    |      |      |      | 7.00  | 8.00    | 7.00    | 9.00  |      | 6.00    | 3.00    | 4.00    | 6.00    | 7.00  | 5.00    |      |      |      |      |
| <b>r_trough</b>           | 0.93    |      | 1.00    |      |      |      | 0.83  | 1.00    | 0.93    | 0.74  |      | 0.91    | 1.00    | 1.00    | 1.00    | 0.87  | 1.00    |      |      |      |      |
| <b>interior_indicator</b> | False   |      | 0.00    |      |      |      | 1.00  | 0.00    | 0.00    | 1.00  |      | 0.00    | 0.00    | 0.00    | 0.00    | 1.00  | 0.00    |      |      |      |      |
| <b>trough_indicator</b>   | False   |      | 0.00    |      |      |      | 1.00  | 0.00    | 1.00    | 1.00  |      | 1.00    | 0.00    | 0.00    | 0.00    | 1.00  | 0.00    |      |      |      |      |
| <b>U_D_depth</b>          | 0.28    |      | 0.00    |      |      |      | 0.62  | 0.00    | 0.90    | 0.46  |      | 0.85    | 0.00    | 0.00    | 0.00    | 0.28  | 0.00    |      |      |      |      |
| <b>U_I_interiority</b>    | 0.06    |      | 0.00    |      |      |      | 0.17  | 0.00    | 0.00    | 0.41  |      | 0.00    | 0.00    | 0.00    | 0.00    | 0.08  | 0.00    |      |      |      |      |
| <b>U_M_monotonicity</b>   | 0.37    |      | 0.00    |      |      |      | 0.82  | 0.00    | 0.87    | 0.71  |      | 0.83    | 0.00    | 0.00    | 0.00    | 0.81  | 0.00    |      |      |      |      |
| <b>U_C_convexity</b>      | 0.33    |      | 0.00    |      |      |      | 0.87  | 0.00    | 0.63    | 0.67  |      | 0.74    | 0.00    | 0.00    | 0.00    | 0.68  | 0.00    |      |      |      |      |
| <b>U_S_symmetry</b>       | 0.34    |      | 0.00    |      |      |      | 0.77  | 0.00    | 0.95    | 0.63  |      | 1.00    | 0.00    | 0.00    | 0.00    | 0.44  | 0.00    |      |      |      |      |
| <b>J_R_rise</b>           | 0.04    |      | 0.00    |      |      |      | 0.38  | 0.00    | 0.10    | 0.00  |      | 0.00    | 0.00    | 0.00    | 0.00    | 0.00  | 0.00    |      |      |      |      |
| <b>J_M_monotonicity</b>   | 0.31    |      | 0.42    |      |      |      | 0.45  | 0.29    | 0.30    | 0.35  |      | 0.38    | 0.10    | 0.23    | 0.24    | 0.44  | 0.27    |      |      |      |      |
| <b>J_C_rightconvex</b>    | 0.50    |      | 0.46    |      |      |      | 0.70  | 0.52    | 0.61    | 0.57  |      | 0.57    | 0.00    | 0.52    | 0.54    | 0.54  | 0.48    |      |      |      |      |
| <b>P_turning</b>          | 0.05    |      | 0.01    |      |      |      | 0.01  | 0.01    | 0.01    | 0.00  |      | 0.03    | 0.25    | 0.12    | 0.03    | 0.01  | 0.06    |      |      |      |      |
| <b>final_structure</b>    | neither |      | neither |      |      |      | U     | neither | neither | U     |      | neither | neither | neither | neither | U     | neither |      |      |      |      |
| <b>U_supported</b>        | False   |      | 0.00    |      |      |      | 1.00  | 0.00    | 0.00    | 1.00  |      | 0.00    | 0.00    | 0.00    | 0.00    | 1.00  | 0.00    |      |      |      |      |
| <b>J_supported</b>        | False   |      | 0.00    |      |      |      | 0.00  | 0.00    | 0.00    | 0.00  |      | 0.00    | 0.00    | 0.00    | 0.00    | 0.00  | 0.00    |      |      |      |      |

Table S6ep. United Kingdom Cantril U-shape ratings, 2006-2024

| KPI                | Mean    | 2005 | 2006 | 2007 | 2008    | 2009    | 2010 | 2011    | 2012    | 2013    | 2014  | 2015 | 2016    | 2017 | 2018    | 2019    | 2020    | 2021    | 2022  | 2023  | 2024 |
|--------------------|---------|------|------|------|---------|---------|------|---------|---------|---------|-------|------|---------|------|---------|---------|---------|---------|-------|-------|------|
| <b>shape_class</b> | neither | U    |      | U    | neither | neither | U    | neither | neither | neither | J     |      | neither |      | neither | neither | neither | neither | J     | J     |      |
| <b>U_beauty</b>    | 0.03    | 0.10 |      | 0.06 | 0.00    | 0.00    | 0.29 | 0.00    | 0.00    | 0.00    | 0.00  |      | 0.00    |      | 0.00    | 0.00    | 0.00    | 0.00    | 0.00  | 0.00  |      |
| <b>J_beauty</b>    | 0.00    | 0.00 |      | 0.00 | 0.00    | 0.00    | 0.02 | 0.00    | 0.00    | 0.00    | 0.01  |      | 0.01    |      | 0.00    | 0.00    | 0.00    | 0.00    | 0.00  | 0.01  |      |
| <b>Dominance</b>   | -0.43   | 1.00 |      | 0.87 | -1.00   |         | 0.87 |         |         | -1.00   | -1.00 |      | -1.00   |      |         |         |         | -1.00   | -1.00 | -1.00 |      |
| <b>best_df</b>     | 4.63    | 5.00 |      | 5.00 | 4.00    | 5.00    | 3.00 | 5.00    | 5.00    | 5.00    | 5.00  |      | 5.00    |      | 4.00    | 4.00    | 5.00    | 4.00    | 5.00  | 5.00  |      |
| <b>p_value</b>     | 0.02    | 0.06 |      | 0.00 | 0.00    | 0.00    | 0.00 | 0.00    | 0.00    | 0.00    | 0.00  |      | 0.00    |      | 0.00    | 0.00    | 0.01    | 0.01    | 0.25  | 0.00  |      |

|                           |         |       |        |         |         |       |         |         |         |        |         |         |         |         |         |       |        |
|---------------------------|---------|-------|--------|---------|---------|-------|---------|---------|---------|--------|---------|---------|---------|---------|---------|-------|--------|
| <b>lr_stat</b>            | 42.90   | 16.49 | 77.06  | 75.89   | 41.55   | 28.69 | 60.32   | 49.74   | 65.03   | 42.28  | 60.50   | 28.94   | 49.41   | 21.16   | 20.01   | 11.37 | 37.89  |
| <b>linear_aic</b>         | 17.97   | 7.33  | 39.19  | 37.75   | 26.75   | 14.77 | 2.40    | 0.62    | 22.50   | 8.53   | 39.55   | 19.27   | 26.48   | 11.92   | 12.33   | 10.07 | 7.97   |
| <b>spline_aic</b>         | -7.68   | 8.83  | -19.88 | -22.14  | 3.20    | 0.09  | -39.92  | -31.11  | -24.53  | -15.75 | -2.95   | 6.33    | -6.93   | 8.77    | 8.32    | 16.70 | -11.92 |
| <b>min_age</b>            | 69.52   | 45.38 | 53.65  | 86.17   | 88.43   | 51.40 |         | 88.05   | 87.49   | 21.32  | 85.98   |         |         |         |         |       | 87.30  |
| <b>min_value</b>          | 6.35    | 6.59  | 6.36   | 6.47    | 5.41    | 6.66  |         | 6.57    | 6.24    | 6.41   | 6.18    |         |         |         |         |       | 6.56   |
| <b>amplitude</b>          | 1.99    | 1.10  | 3.63   | 3.53    | 2.09    | 1.35  | 1.09    | 0.96    | 2.26    | 2.09   | 3.82    | 1.69    | 2.37    | 1.31    | 1.51    | 1.67  | 1.44   |
| <b>delta_endpoints</b>    | 0.71    | 0.05  | 2.75   | 2.64    | -0.46   | 0.61  | -1.09   | -0.47   | 2.13    | 1.64   | 3.77    | -1.66   | -1.73   | -0.68   | 1.51    | 1.13  | 1.25   |
| <b>n_minima</b>           | 3.56    | 4.00  | 4.00   | 4.00    | 4.00    | 2.00  | 4.00    | 5.00    | 4.00    | 4.00   | 3.00    | 3.00    | 2.00    | 4.00    | 4.00    | 3.00  | 3.00   |
| <b>n_maxima</b>           | 3.44    | 5.00  | 3.00   | 3.00    | 4.00    | 1.00  | 4.00    | 4.00    | 4.00    | 3.00   | 3.00    | 3.00    | 3.00    | 4.00    | 4.00    | 4.00  | 3.00   |
| <b>turning_points</b>     | 7.00    | 9.00  | 7.00   | 7.00    | 8.00    | 3.00  | 8.00    | 9.00    | 8.00    | 7.00   | 6.00    | 6.00    | 5.00    | 8.00    | 8.00    | 7.00  | 6.00   |
| <b>r_trough</b>           | 0.69    | 0.38  | 0.49   | 0.92    | 0.95    | 0.46  | 1.00    | 0.95    | 0.94    | 0.06   | 0.92    | 1.00    | 1.00    | 1.00    | 0.00    | 0.00  | 0.94   |
| <b>interior_indicator</b> | False   | 1.00  | 1.00   | 0.00    | 0.00    | 1.00  | 0.00    | 0.00    | 0.00    | 0.00   | 0.00    | 0.00    | 0.00    | 0.00    | 0.00    | 0.00  | 0.00   |
| <b>trough_indicator</b>   | True    | 1.00  | 1.00   | 1.00    | 1.00    | 1.00  | 0.00    | 1.00    | 1.00    | 1.00   | 1.00    | 0.00    | 0.00    | 0.00    | 0.00    | 0.00  | 1.00   |
| <b>U_D_depth</b>          | 0.19    | 0.33  | 0.24   | 0.25    | 0.76    | 0.55  | 0.00    | 0.51    | 0.06    | 0.21   | 0.01    | 0.00    | 0.00    | 0.00    | 0.00    | 0.00  | 0.13   |
| <b>U_I_interiority</b>    | 0.16    | 0.70  | 0.97   | 0.00    | 0.00    | 0.90  | 0.00    | 0.00    | 0.00    | 0.00   | 0.00    | 0.00    | 0.00    | 0.00    | 0.00    | 0.00  | 0.00   |
| <b>U_M_monotonicity</b>   | 0.45    | 0.65  | 0.65   | 0.70    | 0.76    | 0.79  | 0.00    | 0.77    | 0.72    | 0.84   | 0.74    | 0.00    | 0.00    | 0.00    | 0.00    | 0.00  | 0.60   |
| <b>U_C_convexity</b>      | 0.44    | 0.70  | 0.70   | 0.69    | 0.68    | 0.99  | 0.00    | 0.67    | 0.64    | 0.70   | 0.65    | 0.00    | 0.00    | 0.00    | 0.00    | 0.00  | 0.65   |
| <b>U_S_symmetry</b>       | 0.29    | 0.93  | 0.39   | 0.40    | 0.87    | 0.71  | 0.00    | 0.67    | 0.11    | 0.35   | 0.02    | 0.00    | 0.00    | 0.00    | 0.00    | 0.00  | 0.23   |
| <b>J_R_rise</b>           | 0.45    | 0.05  | 0.76   | 0.75    | 0.00    | 0.45  | 0.00    | 0.00    | 0.94    | 0.79   | 0.99    | 0.00    | 0.00    | 0.00    | 1.00    | 0.67  | 0.87   |
| <b>J_M_monotonicity</b>   | 0.53    | 0.57  | 0.56   | 0.54    | 0.45    | 0.34  | 0.39    | 0.44    | 0.52    | 0.67   | 0.49    | 0.50    | 0.61    | 0.50    | 0.56    | 0.63  | 0.66   |
| <b>J_C_rightconvex</b>    | 0.56    | 0.45  | 0.91   | 0.50    | 0.51    | 0.78  | 0.44    | 0.55    | 0.57    | 0.79   | 0.52    | 0.46    | 0.52    | 0.45    | 0.48    | 0.47  | 0.57   |
| <b>P_turning</b>          | 0.03    | 0.00  | 0.01   | 0.01    | 0.01    | 0.25  | 0.01    | 0.00    | 0.01    | 0.01   | 0.03    | 0.03    | 0.06    | 0.01    | 0.01    | 0.01  | 0.03   |
| <b>final_structure</b>    | neither | U     | U      | neither | neither | U     | neither | neither | neither | J      | neither | neither | neither | neither | neither | J     | J      |
| <b>U_supported</b>        | False   | 1.00  | 1.00   | 0.00    | 0.00    | 1.00  | 0.00    | 0.00    | 0.00    | 0.00   | 0.00    | 0.00    | 0.00    | 0.00    | 0.00    | 0.00  | 0.00   |
| <b>J_supported</b>        | False   | 0.00  | 0.00   | 0.00    | 0.00    | 0.00  | 0.00    | 0.00    | 0.00    | 1.00   | 0.00    | 0.00    | 0.00    | 0.00    | 0.00    | 1.00  | 1.00   |

Table S6eq. United States Cantril U-shape ratings, 2006-2024

| KPI                    | Mean  | 2005 | 2006 | 2007 | 2008    | 2009  | 2010  | 2011  | 2012   | 2013  | 2014  | 2015  | 2016  | 2017  | 2018    | 2019   | 2020    | 2021  | 2022  | 2023  | 2024    |
|------------------------|-------|------|------|------|---------|-------|-------|-------|--------|-------|-------|-------|-------|-------|---------|--------|---------|-------|-------|-------|---------|
| <b>shape_class</b>     | U     |      |      |      | neither | U     | U     | U     | U      | U     | U     | U     | U     | J     | neither | U      | neither | J     | U     | J     | neither |
| <b>U_beauty</b>        | 0.07  |      |      |      | 0.00    | 0.29  | 0.20  | 0.11  | 0.02   | 0.31  | 0.08  | 0.14  | 0.03  | 0.00  | 0.01    | 0.00   | 0.00    | 0.01  | 0.01  | 0.00  | 0.00    |
| <b>J_beauty</b>        | 0.05  |      |      |      | 0.00    | 0.00  | 0.00  | 0.00  | 0.00   | 0.00  | 0.00  | 0.00  | 0.01  | 0.01  | 0.00    | 0.00   | 0.00    | 0.89  | 0.01  | 0.02  | 0.00    |
| <b>Dominance</b>       | 0.42  |      |      |      |         | 1.00  | 1.00  | 1.00  | 1.00   | 1.00  | 1.00  | 1.00  | 0.63  | -1.00 |         | 0.90   |         | -1.00 | -0.03 | -1.00 |         |
| <b>best_df</b>         | 4.59  |      |      |      | 5.00    | 4.00  | 5.00  | 5.00  | 5.00   | 4.00  | 5.00  | 5.00  | 5.00  | 4.00  | 5.00    | 4.00   | 5.00    | 3.00  | 5.00  | 4.00  | 5.00    |
| <b>p_value</b>         | 0.00  |      |      |      | 0.00    | 0.00  | 0.00  | 0.00  | 0.00   | 0.02  | 0.00  | 0.00  | 0.00  | 0.00  | 0.00    | 0.00   | 0.00    | 0.05  | 0.00  | 0.00  | 0.00    |
| <b>lr_stat</b>         | 33.28 |      |      |      | 28.94   | 30.54 | 31.81 | 26.50 | 48.54  | 18.76 | 36.47 | 30.91 | 26.85 | 24.63 | 48.25   | 36.14  | 46.19   | 14.28 | 33.45 | 28.91 | 54.59   |
| <b>linear_aic</b>      | 12.59 |      |      |      | 16.27   | 16.76 | 19.90 | 11.81 | 14.95  | 6.71  | 9.80  | 11.45 | 1.79  | 6.95  | 23.38   | 5.95   | 22.39   | 2.81  | 10.18 | 8.56  | 24.42   |
| <b>spline_aic</b>      | -3.51 |      |      |      | 5.32    | 2.21  | 6.08  | 3.31  | -15.59 | 3.95  | -8.67 | -1.46 | -7.07 | -1.67 | -6.88   | -14.20 | -5.80   | 2.53  | -5.27 | -4.35 | -12.17  |
| <b>min_age</b>         | 40.50 |      |      |      | 89.18   | 48.02 | 45.76 | 45.95 | 27.53  | 48.58 | 50.08 | 44.44 | 28.65 |       |         | 28.28  |         | 20.38 | 26.96 |       | 22.64   |
| <b>min_value</b>       | 6.60  |      |      |      | 6.52    | 6.68  | 6.50  | 6.84  | 6.86   | 6.74  | 6.91  | 6.54  | 6.50  |       |         | 6.58   |         | 6.74  | 5.95  |       | 6.39    |
| <b>amplitude</b>       | 1.48  |      |      |      | 1.26    | 1.35  | 1.50  | 1.15  | 1.31   | 0.80  | 1.07  | 1.41  | 1.25  | 1.40  | 1.93    | 1.19   | 1.74    | 2.54  | 1.79  |       | 1.51    |
| <b>delta_endpoints</b> | 0.04  |      |      |      | -0.73   | -0.24 | -0.33 | -0.51 | -0.49  | -0.28 | -0.47 | 0.03  | 0.66  | 0.47  | -0.63   | 0.18   | -0.48   | 1.73  | 1.80  | 1.33  | -1.29   |
| <b>n_minima</b>        | 2.94  |      |      |      | 4.00    | 3.00  | 3.00  | 4.00  | 4.00   | 3.00  | 3.00  | 4.00  | 3.00  | 2.00  | 3.00    | 3.00   | 3.00    | 1.00  | 3.00  | 2.00  | 2.00    |
| <b>n_maxima</b>        | 3.12  |      |      |      | 3.00    | 3.00  | 4.00  | 3.00  | 4.00   | 3.00  | 3.00  | 5.00  | 3.00  | 3.00  | 4.00    | 4.00   | 3.00    | 0.00  | 3.00  | 3.00  | 2.00    |
| <b>turning_points</b>  | 6.06  |      |      |      | 7.00    | 6.00  | 7.00  | 7.00  | 8.00   | 6.00  | 6.00  | 9.00  | 6.00  | 5.00  | 7.00    | 7.00   | 6.00    | 1.00  | 6.00  | 5.00  | 4.00    |

|                           |       |         |      |      |      |      |      |      |      |      |      |         |      |         |      |      |      |         |
|---------------------------|-------|---------|------|------|------|------|------|------|------|------|------|---------|------|---------|------|------|------|---------|
| <b>r_trough</b>           | 0.36  | 0.96    | 0.41 | 0.38 | 0.39 | 0.14 | 0.42 | 0.44 | 0.37 | 0.16 | 0.00 | 1.00    | 0.15 | 1.00    | 0.05 | 0.13 | 0.00 | 0.08    |
| <b>interior_indicator</b> | True  | 0.00    | 1.00 | 1.00 | 1.00 | 1.00 | 1.00 | 1.00 | 1.00 | 1.00 | 0.00 | 0.00    | 1.00 | 0.00    | 0.00 | 1.00 | 0.00 | 0.00    |
| <b>trough_indicator</b>   | True  | 1.00    | 1.00 | 1.00 | 1.00 | 1.00 | 1.00 | 1.00 | 1.00 | 1.00 | 0.00 | 0.00    | 1.00 | 0.00    | 1.00 | 0.00 | 1.00 | 0.00    |
| <b>U_D_depth</b>          | 0.29  | 0.38    | 0.61 | 0.66 | 0.35 | 0.36 | 0.65 | 0.24 | 0.54 | 0.47 | 0.00 | 0.00    | 0.21 | 0.00    | 0.01 | 0.29 | 0.00 | 0.07    |
| <b>U_I_interiority</b>    | 0.29  | 0.00    | 0.78 | 0.71 | 0.71 | 0.10 | 0.80 | 0.85 | 0.66 | 0.14 | 0.00 | 0.00    | 0.13 | 0.00    | 0.00 | 0.08 | 0.00 | 0.00    |
| <b>U_M_monotonicity</b>   | 0.58  | 0.71    | 0.76 | 0.67 | 0.71 | 0.83 | 0.79 | 0.67 | 0.63 | 0.80 | 0.00 | 0.00    | 0.68 | 0.00    | 1.00 | 0.85 | 0.00 | 0.77    |
| <b>U_C_convexity</b>      | 0.60  | 0.69    | 0.94 | 0.72 | 0.82 | 0.78 | 0.89 | 1.00 | 0.65 | 0.68 | 0.00 | 0.00    | 0.77 | 0.00    | 1.00 | 0.65 | 0.00 | 0.66    |
| <b>U_S_symmetry</b>       | 0.46  | 0.56    | 0.87 | 0.86 | 0.61 | 0.66 | 0.79 | 0.52 | 0.98 | 0.64 | 0.00 | 0.00    | 0.74 | 0.00    | 0.01 | 0.45 | 0.00 | 0.15    |
| <b>J_R_rise</b>           | 0.20  | 0.00    | 0.00 | 0.00 | 0.00 | 0.00 | 0.00 | 0.00 | 0.02 | 0.53 | 0.34 | 0.00    | 0.15 | 0.00    | 0.99 | 0.71 | 0.74 | 0.00    |
| <b>J_M_monotonicity</b>   | 0.59  | 0.51    | 0.45 | 0.55 | 0.49 | 0.60 | 0.38 | 0.56 | 0.51 | 0.66 | 0.65 | 0.65    | 0.53 | 0.60    | 0.95 | 0.74 | 0.66 | 0.55    |
| <b>J_C_rightconvex</b>    | 0.42  | 0.50    | 0.53 | 0.50 | 0.49 | 0.38 | 0.45 | 0.44 | 0.43 | 0.58 | 0.43 | 0.38    | 0.32 | 0.16    | 0.87 | 0.46 | 0.30 | 0.00    |
| <b>P_turning</b>          | 0.09  | 0.01    | 0.03 | 0.01 | 0.01 | 0.01 | 0.03 | 0.03 | 0.00 | 0.03 | 0.06 | 0.01    | 0.01 | 0.03    | 1.00 | 0.03 | 0.06 | 0.12    |
| <b>final_structure</b>    | U     | neither | U    | U    | U    | U    | U    | U    | U    | U    | J    | neither | U    | neither | J    | U    | J    | neither |
| <b>U_supported</b>        | True  | 0.00    | 1.00 | 1.00 | 1.00 | 1.00 | 1.00 | 1.00 | 1.00 | 1.00 | 0.00 | 0.00    | 1.00 | 0.00    | 0.00 | 1.00 | 0.00 | 0.00    |
| <b>J_supported</b>        | False | 0.00    | 0.00 | 0.00 | 0.00 | 0.00 | 0.00 | 0.00 | 0.00 | 0.00 | 1.00 | 0.00    | 0.00 | 0.00    | 1.00 | 0.00 | 1.00 | 0.00    |

Table S6er. Uruguay Cantril U-shape ratings, 2006-2024

| KPI                       | Mean  | 2005  | 2006    | 2007  | 2008    | 2009    | 2010    | 2011    | 2012  | 2013    | 2014  | 2015  | 2016  | 2017  | 2018  | 2019  | 2020  | 2021    | 2022    | 2023  | 2024 |
|---------------------------|-------|-------|---------|-------|---------|---------|---------|---------|-------|---------|-------|-------|-------|-------|-------|-------|-------|---------|---------|-------|------|
| <b>shape_class</b>        | U     | U     | neither | U     | neither | neither | neither | neither | U     | neither | U     | U     | U     | U     | U     | U     | U     | neither | neither | U     |      |
| <b>U_beauty</b>           | 0.15  | 0.06  | 0.00    | 0.49  | 0.00    | 0.00    | 0.00    | 0.00    | 0.14  | 0.00    | 0.20  | 0.31  | 0.84  | 0.13  | 0.05  | 0.24  | 0.00  | 0.00    | 0.25    |       |      |
| <b>J_beauty</b>           | 0.00  | 0.00  | 0.00    | 0.00  | 0.00    | 0.00    | 0.00    | 0.00    | 0.00  | 0.00    | 0.00  | 0.00  | 0.00  | 0.00  | 0.01  | 0.00  | 0.00  | 0.00    | 0.00    |       |      |
| <b>Dominance</b>          | 0.79  | 1.00  | 1.00    | 1.00  | 1.00    | 1.00    | 1.00    | 1.00    | 0.97  | 1.00    | 1.00  | 1.00  | 1.00  | 1.00  | 0.69  | 1.00  | -1.00 | 1.00    | 1.00    |       |      |
| <b>best_df</b>            | 4.56  | 5.00  | 5.00    | 4.00  | 5.00    | 5.00    | 5.00    | 4.00    | 5.00  | 5.00    | 5.00  | 4.00  | 3.00  | 5.00  | 5.00  | 4.00  | 5.00  | 5.00    | 3.00    |       |      |
| <b>p_value</b>            | 0.00  | 0.00  | 0.00    | 0.00  | 0.00    | 0.00    | 0.00    | 0.00    | 0.00  | 0.00    | 0.00  | 0.02  | 0.00  | 0.00  | 0.00  | 0.02  | 0.00  | 0.00    | 0.00    |       |      |
| <b>lr_stat</b>            | 39.87 | 41.94 | 29.17   | 34.29 | 37.69   | 58.01   | 52.02   | 54.73   | 45.99 | 37.79   | 45.87 | 18.96 | 31.38 | 39.25 | 56.89 | 18.15 | 39.68 | 44.11   | 31.69   |       |      |
| <b>linear_aic</b>         | 26.20 | 25.81 | 21.42   | 35.74 | 8.58    | 24.17   | 30.55   | 43.56   | 37.17 | 24.09   | 23.42 | 29.44 | 27.50 | 18.82 | 34.88 | 18.10 | 27.91 | 20.31   | 20.08   |       |      |
| <b>spline_aic</b>         | 3.44  | 1.87  | 10.25   | 17.45 | -11.11  | -15.84  | -3.47   | 4.83    | 9.18  | 4.29    | -4.45 | 26.48 | 10.12 | -2.43 | -4.01 | 15.95 | 6.23  | -5.80   | 2.39    |       |      |
| <b>min_age</b>            | 62.77 | 62.86 | 62.86   | 54.59 | 54.59   | 54.59   | 54.59   | 54.59   | 67.56 | 67.56   | 67.56 | 64.18 | 51.59 | 51.02 | 63.24 | 55.72 | 49.71 | 87.68   | 90.12   | 54.97 |      |
| <b>min_value</b>          | 5.82  | 5.07  | 5.07    | 4.92  | 4.92    | 4.92    | 4.92    | 4.92    | 5.91  | 5.91    | 5.91  | 6.16  | 5.75  | 5.79  | 5.64  | 6.33  | 5.91  | 5.96    | 6.13    | 6.25  |      |
| <b>amplitude</b>          | 2.21  | 1.85  | 2.82    | 2.31  | 1.47    | 2.99    | 2.73    | 5.22    | 2.75  | 1.81    | 1.50  | 1.60  | 1.49  | 1.67  | 2.99  | 1.20  | 2.38  | 1.44    | 1.56    |       |      |
| <b>delta_endpoints</b>    | -0.85 | -1.42 | -2.82   | 0.22  | -1.47   | -2.94   | -2.30   | -5.19   | 1.28  | -1.69   | -0.41 | -0.58 | -0.07 | -0.82 | 2.55  | -0.20 | 1.34  | -0.71   | -0.11   |       |      |
| <b>n_minima</b>           | 3.33  | 4.00  | 4.00    | 3.00  | 3.00    | 4.00    | 3.00    | 2.00    | 4.00  | 3.00    | 4.00  | 3.00  | 1.00  | 4.00  | 3.00  | 4.00  | 4.00  | 4.00    | 3.00    |       |      |
| <b>n_maxima</b>           | 3.33  | 4.00  | 4.00    | 3.00  | 3.00    | 5.00    | 3.00    | 3.00    | 3.00  | 4.00    | 4.00  | 2.00  | 0.00  | 4.00  | 3.00  | 4.00  | 4.00  | 3.00    | 4.00    |       |      |
| <b>turning_points</b>     | 6.67  | 8.00  | 8.00    | 6.00  | 6.00    | 9.00    | 6.00    | 5.00    | 7.00  | 7.00    | 8.00  | 5.00  | 1.00  | 8.00  | 6.00  | 8.00  | 8.00  | 7.00    | 7.00    |       |      |
| <b>r_trough</b>           | 0.74  | 0.61  | 1.00    | 0.50  | 1.00    | 1.00    | 1.00    | 1.00    | 0.67  | 1.00    | 0.63  | 0.46  | 0.45  | 0.62  | 0.52  | 0.44  | 0.94  | 0.97    | 0.51    |       |      |
| <b>interior_indicator</b> | True  | 1.00  | 0.00    | 1.00  | 0.00    | 0.00    | 0.00    | 0.00    | 1.00  | 0.00    | 1.00  | 1.00  | 1.00  | 1.00  | 1.00  | 1.00  | 1.00  | 0.00    | 1.00    |       |      |
| <b>trough_indicator</b>   | True  | 1.00  | 0.00    | 1.00  | 0.00    | 0.00    | 0.00    | 0.00    | 1.00  | 0.00    | 1.00  | 1.00  | 1.00  | 1.00  | 1.00  | 1.00  | 1.00  | 1.00    | 1.00    |       |      |
| <b>U_D_depth</b>          | 0.35  | 0.23  | 0.00    | 0.80  | 0.00    | 0.00    | 0.00    | 0.00    | 0.53  | 0.00    | 0.72  | 0.63  | 0.96  | 0.51  | 0.15  | 0.69  | 0.44  | 0.19    | 0.47    |       |      |
| <b>U_I_interiority</b>    | 0.46  | 0.72  | 0.00    | 1.00  | 0.00    | 0.00    | 0.00    | 0.00    | 0.56  | 0.00    | 0.68  | 0.90  | 0.88  | 0.71  | 0.96  | 0.84  | 0.00  | 0.00    | 0.98    |       |      |
| <b>U_M_monotonicity</b>   | 0.49  | 0.75  | 0.00    | 0.74  | 0.00    | 0.00    | 0.00    | 0.00    | 0.68  | 0.00    | 0.67  | 0.77  | 1.00  | 0.65  | 0.82  | 0.63  | 0.74  | 0.76    | 0.71    |       |      |
| <b>U_C_convexity</b>      | 0.54  | 0.71  | 0.00    | 1.00  | 0.00    | 0.00    | 0.00    | 0.00    | 1.00  | 0.00    | 0.65  | 0.81  | 1.00  | 0.67  | 0.86  | 0.76  | 0.63  | 0.66    | 0.89    |       |      |
| <b>U_S_symmetry</b>       | 0.47  | 0.38  | 0.00    | 0.94  | 0.00    | 0.00    | 0.00    | 0.00    | 0.70  | 0.00    | 0.84  | 0.78  | 0.98  | 0.68  | 0.26  | 0.89  | 0.61  | 0.43    | 0.93    |       |      |
| <b>J_R_rise</b>           | 0.11  | 0.00  | 0.00    | 0.10  | 0.00    | 0.00    | 0.00    | 0.00    | 0.47  | 0.00    | 0.00  | 0.00  | 0.00  | 0.00  | 0.85  | 0.00  | 0.56  | 0.00    | 0.00    |       |      |
| <b>J_M_monotonicity</b>   | 0.47  | 0.52  | 0.42    | 0.45  | 0.44    | 0.41    | 0.42    | 0.28    | 0.51  | 0.54    | 0.48  | 0.53  | 0.55  | 0.46  | 0.56  | 0.48  | 0.49  | 0.44    | 0.49    |       |      |

|                        |       |      |         |      |         |         |         |         |      |         |      |      |      |      |      |      |         |         |      |
|------------------------|-------|------|---------|------|---------|---------|---------|---------|------|---------|------|------|------|------|------|------|---------|---------|------|
| <b>J_C_rightconvex</b> | 0.46  | 0.37 | 0.37    | 0.57 | 0.29    | 0.45    | 0.53    | 0.08    | 0.54 | 0.53    | 0.49 | 0.44 | 0.66 | 0.42 | 0.58 | 0.48 | 0.55    | 0.50    | 0.47 |
| <b>P_turning</b>       | 0.08  | 0.01 | 0.01    | 0.03 | 0.03    | 0.00    | 0.03    | 0.06    | 0.01 | 0.01    | 0.01 | 0.06 | 1.00 | 0.01 | 0.03 | 0.01 | 0.01    | 0.01    | 0.01 |
| <b>final_structure</b> | U     | U    | neither | U    | neither | neither | neither | neither | U    | neither | U    | U    | U    | U    | U    | U    | neither | neither | U    |
| <b>U_supported</b>     | True  | 1.00 | 0.00    | 1.00 | 0.00    | 0.00    | 0.00    | 0.00    | 1.00 | 0.00    | 1.00 | 1.00 | 1.00 | 1.00 | 1.00 | 1.00 | 0.00    | 0.00    | 1.00 |
| <b>J_supported</b>     | False | 0.00 | 0.00    | 0.00 | 0.00    | 0.00    | 0.00    | 0.00    | 0.00 | 0.00    | 0.00 | 0.00 | 0.00 | 0.00 | 0.00 | 0.00 | 0.00    | 0.00    | 0.00 |

Table S6es. Uzbekistan Cantril U-shape ratings, 2006-2024

| KPI                       | Mean    | 2005 | 2006 | 2007 | 2008 | 2009 | 2010 | 2011 | 2012 | 2013 | 2014 | 2015  | 2016 | 2017 | 2018    | 2019 | 2020 | 2021    | 2022    | 2023  | 2024  |
|---------------------------|---------|------|------|------|------|------|------|------|------|------|------|-------|------|------|---------|------|------|---------|---------|-------|-------|
| <b>shape_class</b>        | neither |      |      |      |      |      |      |      |      |      |      | J     |      |      | neither |      |      | neither | neither | U     | U     |
| <b>U_beauty</b>           | 0.00    |      |      |      |      |      |      |      |      |      |      | 0.00  |      |      | 0.00    |      |      | 0.00    | 0.00    | 0.01  | 0.01  |
| <b>J_beauty</b>           | 0.02    |      |      |      |      |      |      |      |      |      |      | 0.12  |      |      | 0.00    |      |      | 0.00    | 0.00    | 0.01  | 0.02  |
| <b>Dominance</b>          | -0.57   |      |      |      |      |      |      |      |      |      |      | -1.00 |      |      | -1.00   |      |      | -1.00   | -1.00   | 0.28  | -0.16 |
| <b>best_df</b>            | 4.33    |      |      |      |      |      |      |      |      |      |      | 3.00  |      |      | 3.00    |      |      | 5.00    | 5.00    | 5.00  | 5.00  |
| <b>p_value</b>            | 0.01    |      |      |      |      |      |      |      |      |      |      | 0.00  |      |      | 0.00    |      |      | 0.05    | 0.03    | 0.00  | 0.00  |
| <b>lr_stat</b>            | 38.98   |      |      |      |      |      |      |      |      |      |      | 47.38 |      |      | 24.25   |      |      | 17.04   | 18.76   | 68.05 | 58.40 |
| <b>linear_aic</b>         | 41.65   |      |      |      |      |      |      |      |      |      |      | 39.16 |      |      | 39.68   |      |      | 27.57   | 49.01   | 43.77 | 50.67 |
| <b>spline_aic</b>         | 19.33   |      |      |      |      |      |      |      |      |      |      | 5.78  |      |      | 29.44   |      |      | 28.54   | 48.25   | -6.27 | 10.27 |
| <b>min_age</b>            | 72.41   |      |      |      |      |      |      |      |      |      |      | 24.33 |      |      |         |      |      | 87.49   | 88.80   | 80.35 | 81.10 |
| <b>min_value</b>          | 5.26    |      |      |      |      |      |      |      |      |      |      | 5.71  |      |      |         |      |      | 5.51    | 4.70    | 5.88  | 4.50  |
| <b>amplitude</b>          | 3.86    |      |      |      |      |      |      |      |      |      |      | 4.31  |      |      | 3.23    |      |      | 1.51    | 4.44    | 4.14  | 5.50  |
| <b>delta_endpoints</b>    | 2.07    |      |      |      |      |      |      |      |      |      |      | 3.83  |      |      | -1.32   |      |      | 0.65    | 2.23    | 3.26  | 3.75  |
| <b>n_minima</b>           | 3.17    |      |      |      |      |      |      |      |      |      |      | 2.00  |      |      | 3.00    |      |      | 4.00    | 4.00    | 3.00  | 3.00  |
| <b>n_maxima</b>           | 2.67    |      |      |      |      |      |      |      |      |      |      | 1.00  |      |      | 3.00    |      |      | 3.00    | 4.00    | 3.00  | 2.00  |
| <b>turning_points</b>     | 5.83    |      |      |      |      |      |      |      |      |      |      | 3.00  |      |      | 6.00    |      |      | 7.00    | 8.00    | 6.00  | 5.00  |
| <b>r_trough</b>           | 0.78    |      |      |      |      |      |      |      |      |      |      | 0.10  |      |      | 1.00    |      |      | 0.94    | 0.96    | 0.84  | 0.85  |
| <b>interior_indicator</b> | False   |      |      |      |      |      |      |      |      |      |      | 0.00  |      |      | 0.00    |      |      | 0.00    | 0.00    | 1.00  | 1.00  |
| <b>trough_indicator</b>   | True    |      |      |      |      |      |      |      |      |      |      | 1.00  |      |      | 0.00    |      |      | 1.00    | 1.00    | 1.00  | 1.00  |
| <b>U_D_depth</b>          | 0.24    |      |      |      |      |      |      |      |      |      |      | 0.11  |      |      | 0.00    |      |      | 0.56    | 0.23    | 0.21  | 0.32  |
| <b>U_I_interiority</b>    | 0.04    |      |      |      |      |      |      |      |      |      |      | 0.00  |      |      | 0.00    |      |      | 0.00    | 0.00    | 0.14  | 0.11  |
| <b>U_M_monotonicity</b>   | 0.64    |      |      |      |      |      |      |      |      |      |      | 0.90  |      |      | 0.00    |      |      | 0.78    | 0.72    | 0.80  | 0.67  |
| <b>U_C_convexity</b>      | 0.62    |      |      |      |      |      |      |      |      |      |      | 0.85  |      |      | 0.00    |      |      | 0.67    | 0.65    | 0.70  | 0.84  |
| <b>U_S_symmetry</b>       | 0.37    |      |      |      |      |      |      |      |      |      |      | 0.20  |      |      | 0.00    |      |      | 0.73    | 0.48    | 0.35  | 0.48  |
| <b>J_R_rise</b>           | 0.55    |      |      |      |      |      |      |      |      |      |      | 0.89  |      |      | 0.00    |      |      | 0.43    | 0.50    | 0.79  | 0.68  |
| <b>J_M_monotonicity</b>   | 0.54    |      |      |      |      |      |      |      |      |      |      | 0.73  |      |      | 0.51    |      |      | 0.44    | 0.51    | 0.44  | 0.61  |
| <b>J_C_rightconvex</b>    | 0.57    |      |      |      |      |      |      |      |      |      |      | 0.62  |      |      | 0.45    |      |      | 0.60    | 0.53    | 0.55  | 0.66  |
| <b>P_turning</b>          | 0.07    |      |      |      |      |      |      |      |      |      |      | 0.25  |      |      | 0.03    |      |      | 0.01    | 0.01    | 0.03  | 0.06  |
| <b>final_structure</b>    | neither |      |      |      |      |      |      |      |      |      |      | J     |      |      | neither |      |      | neither | neither | U     | U     |
| <b>U_supported</b>        | False   |      |      |      |      |      |      |      |      |      |      | 0.00  |      |      | 0.00    |      |      | 0.00    | 0.00    | 1.00  | 1.00  |
| <b>J_supported</b>        | False   |      |      |      |      |      |      |      |      |      |      | 1.00  |      |      | 0.00    |      |      | 0.00    | 0.00    | 0.00  | 0.00  |

Table S6et. Venezuela Cantril U-shape ratings, 2006-2024

| KPI                | Mean    | 2005    | 2006 | 2007 | 2008 | 2009    | 2010 | 2011    | 2012  | 2013    | 2014    | 2015 | 2016 | 2017    | 2018    | 2019    | 2020  | 2021 | 2022    | 2023  | 2024    |
|--------------------|---------|---------|------|------|------|---------|------|---------|-------|---------|---------|------|------|---------|---------|---------|-------|------|---------|-------|---------|
| shape_class        | neither | neither |      |      |      | neither |      | neither | U     | neither | neither |      |      | neither | neither | neither | U     |      | neither | U     | neither |
| U_beauty           | 0.01    | 0.00    |      |      |      | 0.00    |      | 0.00    | 0.02  | 0.00    | 0.00    |      |      | 0.00    | 0.00    | 0.00    | 0.01  |      | 0.00    | 0.05  | 0.01    |
| J_beauty           | 0.00    | 0.00    |      |      |      | 0.00    |      | 0.00    | 0.04  | 0.00    | 0.00    |      |      | 0.00    | 0.00    | 0.00    | 0.00  |      | 0.00    | 0.00  | 0.00    |
| Dominance          | 0.05    |         |      |      |      |         |      |         | -0.34 |         |         |      |      |         | -1.00   |         | 0.61  |      |         | 0.91  | 0.05    |
| best_df            | 4.58    | 3.00    |      |      |      | 5.00    |      | 5.00    | 3.00  | 4.00    | 5.00    |      |      | 5.00    | 5.00    | 5.00    | 5.00  |      | 5.00    | 5.00  | 4.58    |
| p_value            | 0.05    | 0.52    |      |      |      | 0.00    |      | 0.02    | 0.00  | 0.00    | 0.00    |      |      | 0.00    | 0.00    | 0.00    | 0.00  |      | 0.00    | 0.00  | 0.05    |
| lr_stat            | 37.98   | 6.15    |      |      |      | 54.73   |      | 19.32   | 27.24 | 26.99   | 43.78   |      |      | 58.13   | 54.31   | 66.80   | 42.58 |      | 31.88   | 23.88 | 37.98   |
| linear_aic         | 33.39   | 14.26   |      |      |      | 41.21   |      | 20.23   | 31.73 | 10.14   | 6.83    |      |      | 48.44   | 59.40   | 29.65   | 60.39 |      | 32.90   | 45.46 | 33.39   |
| spline_aic         | 12.57   | 22.11   |      |      |      | 4.48    |      | 18.92   | 18.48 | -0.85   | -18.95  |      |      | 8.32    | 23.09   | -19.14  | 35.81 |      | 19.02   | 39.58 | 12.57   |
| min_age            | 82.82   | 86.74   |      |      |      |         |      |         | 79.41 |         |         |      |      |         | 87.11   |         | 82.41 |      | 90.31   | 70.95 | 82.82   |
| min_value          | 5.02    | 6.56    |      |      |      |         |      |         | 6.54  |         |         |      |      |         | 3.30    |         | 3.29  |      | 5.25    | 5.17  | 5.02    |
| amplitude          | 3.27    | 1.01    |      |      |      | 4.16    |      | 2.17    | 2.40  | 2.10    | 1.52    |      |      | 4.62    | 6.69    | 2.35    | 6.73  |      | 1.91    | 3.56  | 3.27    |
| delta_endpoints    | -0.42   | -0.40   |      |      |      | -3.80   |      | -2.17   | 1.78  | -1.88   | -1.48   |      |      | -4.34   | 4.41    | -2.35   | 4.68  |      | -1.67   | 2.16  | -0.42   |
| n_minima           | 3.25    | 2.00    |      |      |      | 3.00    |      | 4.00    | 2.00  | 3.00    | 2.00    |      |      | 4.00    | 4.00    | 3.00    | 4.00  |      | 4.00    | 4.00  | 3.25    |
| n_maxima           | 3.00    | 2.00    |      |      |      | 3.00    |      | 4.00    | 2.00  | 3.00    | 3.00    |      |      | 4.00    | 3.00    | 3.00    | 3.00  |      | 3.00    | 3.00  | 3.00    |
| turning_points     | 6.25    | 4.00    |      |      |      | 6.00    |      | 8.00    | 4.00  | 6.00    | 5.00    |      |      | 8.00    | 7.00    | 6.00    | 7.00  |      | 7.00    | 7.00  | 6.25    |
| r_trough           | 0.94    | 0.93    |      |      |      | 1.00    |      | 1.00    | 0.83  | 1.00    | 1.00    |      |      | 1.00    | 0.93    | 1.00    | 0.87  |      | 0.98    | 0.72  | 0.94    |
| interior_indicator | False   | 0.00    |      |      |      | 0.00    |      | 0.00    | 1.00  | 0.00    | 0.00    |      |      | 0.00    | 0.00    | 0.00    | 1.00  |      | 0.00    | 1.00  | False   |
| trough_indicator   | True    | 1.00    |      |      |      | 0.00    |      | 0.00    | 1.00  | 0.00    | 0.00    |      |      | 0.00    | 1.00    | 0.00    | 1.00  |      | 1.00    | 1.00  | True    |
| U_D_depth          | 0.15    | 0.38    |      |      |      | 0.00    |      | 0.00    | 0.26  | 0.00    | 0.00    |      |      | 0.00    | 0.34    | 0.00    | 0.30  |      | 0.13    | 0.39  | 0.15    |
| U_I_interiority    | 0.06    | 0.00    |      |      |      | 0.00    |      | 0.00    | 0.17  | 0.00    | 0.00    |      |      | 0.00    | 0.00    | 0.00    | 0.07  |      | 0.00    | 0.45  | 0.06    |
| U_M_monotonicity   | 0.36    | 0.76    |      |      |      | 0.00    |      | 0.00    | 0.74  | 0.00    | 0.00    |      |      | 0.00    | 0.69    | 0.00    | 0.83  |      | 0.68    | 0.64  | 0.36    |
| U_C_convexity      | 0.40    | 0.85    |      |      |      | 0.00    |      | 0.00    | 1.00  | 0.18    | 0.00    |      |      | 0.00    | 0.65    | 0.00    | 0.84  |      | 0.69    | 0.65  | 0.40    |
| U_S_symmetry       | 0.24    | 0.66    |      |      |      | 0.00    |      | 0.00    | 0.41  | 0.00    | 0.00    |      |      | 0.00    | 0.51    | 0.00    | 0.47  |      | 0.22    | 0.56  | 0.24    |
| J_R_rise           | 0.23    | 0.00    |      |      |      | 0.00    |      | 0.00    | 0.74  | 0.00    | 0.00    |      |      | 0.00    | 0.66    | 0.00    | 0.70  |      | 0.00    | 0.61  | 0.23    |
| J_M_monotonicity   | 0.44    | 0.47    |      |      |      | 0.42    |      | 0.46    | 0.54  | 0.35    | 0.27    |      |      | 0.47    | 0.55    | 0.37    | 0.40  |      | 0.55    | 0.49  | 0.44    |
| J_C_rightconvex    | 0.49    | 0.58    |      |      |      | 0.50    |      | 0.42    | 1.00  | 0.53    | 0.00    |      |      | 0.22    | 0.52    | 0.32    | 0.78  |      | 0.47    | 0.56  | 0.49    |
| P_turning          | 0.04    | 0.12    |      |      |      | 0.03    |      | 0.01    | 0.12  | 0.03    | 0.06    |      |      | 0.01    | 0.01    | 0.03    | 0.01  |      | 0.01    | 0.01  | 0.04    |
| final_structure    | neither | neither |      |      |      | neither |      | neither | U     | neither | neither |      |      | neither | neither | neither | U     |      | neither | U     | neither |
| U_supported        | False   | 0.00    |      |      |      | 0.00    |      | 0.00    | 1.00  | 0.00    | 0.00    |      |      | 0.00    | 0.00    | 0.00    | 1.00  |      | 0.00    | 1.00  | False   |
| J_supported        | False   | 0.00    |      |      |      | 0.00    |      | 0.00    | 0.00  | 0.00    | 0.00    |      |      | 0.00    | 0.00    | 0.00    | 0.00  |      | 0.00    | 0.00  | False   |

Table S6eu. Vietnam Cantril U-shape ratings, 2006-2024

| KPI         | Mean    | 2005 | 2006    | 2007 | 2008 | 2009 | 2010 | 2011    | 2012    | 2013 | 2014    | 2015 | 2016 | 2017    | 2018    | 2019    | 2020    | 2021 | 2022    | 2023 | 2024 |
|-------------|---------|------|---------|------|------|------|------|---------|---------|------|---------|------|------|---------|---------|---------|---------|------|---------|------|------|
| shape_class | neither |      | neither |      |      |      |      | neither | neither |      | neither |      |      | neither | neither | neither | neither |      | neither |      |      |
| U_beauty    | 0.00    |      | 0.00    |      |      |      |      | 0.00    | 0.00    |      | 0.00    |      |      | 0.00    | 0.00    | 0.00    | 0.00    |      | 0.00    |      |      |
| J_beauty    | 0.00    |      | 0.00    |      |      |      |      | 0.00    | 0.00    |      | 0.00    |      |      | 0.00    | 0.00    | 0.00    | 0.00    |      | 0.00    |      |      |
| Dominance   | -1.00   |      |         |      |      |      |      |         |         |      |         |      |      |         |         | -1.00   | -1.00   |      |         |      |      |
| best_df     | 4.71    |      | 5.00    |      |      |      |      | 5.00    | 5.00    |      | 5.00    |      |      | 5.00    | 3.00    | 5.00    | 4.71    |      | 5.00    |      |      |
| p_value     | 0.00    |      | 0.00    |      |      |      |      | 0.00    | 0.00    |      | 0.00    |      |      | 0.00    | 0.00    | 0.00    | 0.00    |      | 0.00    |      |      |

|                           |         |         |  |         |         |         |  |         |         |         |         |         |
|---------------------------|---------|---------|--|---------|---------|---------|--|---------|---------|---------|---------|---------|
| <b>lr_stat</b>            | 46.66   | 57.09   |  | 30.04   | 37.09   | 41.64   |  | 44.21   | 62.38   | 54.16   | 46.66   | 57.09   |
| <b>linear_aic</b>         | 26.04   | 12.82   |  | 15.45   | 25.83   | 10.04   |  | 28.40   | 43.47   | 46.29   | 26.04   | 12.82   |
| <b>spline_aic</b>         | -3.19   | -26.27  |  | 3.41    | 6.74    | -13.60  |  | 2.19    | -4.91   | 10.12   | -3.19   | -26.27  |
| <b>min_age</b>            | 88.49   |         |  | 89.37   |         | 88.62   |  |         |         | 87.49   | 88.49   |         |
| <b>min_value</b>          | 3.88    |         |  | 4.36    |         | 4.24    |  |         |         | 3.04    | 3.88    |         |
| <b>amplitude</b>          | 2.85    | 1.73    |  | 2.34    | 2.49    | 1.62    |  | 2.95    | 3.88    | 4.95    | 2.85    | 1.73    |
| <b>delta_endpoints</b>    | -1.26   | -1.44   |  | -1.70   | -2.10   | -0.81   |  | -2.51   | -2.39   | 2.12    | -1.26   | -1.44   |
| <b>n_minima</b>           | 2.86    | 3.00    |  | 3.00    | 3.00    | 3.00    |  | 3.00    | 2.00    | 3.00    | 2.86    | 3.00    |
| <b>n_maxima</b>           | 3.00    | 4.00    |  | 2.00    | 3.00    | 3.00    |  | 4.00    | 3.00    | 2.00    | 3.00    | 4.00    |
| <b>turning_points</b>     | 5.86    | 7.00    |  | 5.00    | 6.00    | 6.00    |  | 7.00    | 5.00    | 5.00    | 5.86    | 7.00    |
| <b>r_trough</b>           | 0.98    | 1.00    |  | 0.96    | 1.00    | 0.95    |  | 1.00    | 1.00    | 0.94    | 0.98    | 1.00    |
| <b>interior_indicator</b> | False   | 0.00    |  | 0.00    | 0.00    | 0.00    |  | 0.00    | 0.00    | 0.00    | False   | 0.00    |
| <b>trough_indicator</b>   | False   | 0.00    |  | 1.00    | 0.00    | 1.00    |  | 0.00    | 0.00    | 1.00    | False   | 0.00    |
| <b>U_D_depth</b>          | 0.19    | 0.00    |  | 0.27    | 0.00    | 0.47    |  | 0.00    | 0.00    | 0.57    | 0.19    | 0.00    |
| <b>U_I_interiority</b>    | 0.00    | 0.00    |  | 0.00    | 0.00    | 0.00    |  | 0.00    | 0.00    | 0.00    | 0.00    | 0.00    |
| <b>U_M_monotonicity</b>   | 0.36    | 0.00    |  | 0.85    | 0.00    | 0.81    |  | 0.00    | 0.00    | 0.87    | 0.36    | 0.00    |
| <b>U_C_convexity</b>      | 0.28    | 0.00    |  | 0.67    | 0.00    | 0.66    |  | 0.00    | 0.00    | 0.66    | 0.28    | 0.00    |
| <b>U_S_symmetry</b>       | 0.26    | 0.00    |  | 0.43    | 0.00    | 0.65    |  | 0.00    | 0.00    | 0.73    | 0.26    | 0.00    |
| <b>J_R_rise</b>           | 0.06    | 0.00    |  | 0.00    | 0.00    | 0.00    |  | 0.00    | 0.00    | 0.43    | 0.06    | 0.00    |
| <b>J_M_monotonicity</b>   | 0.40    | 0.51    |  | 0.31    | 0.37    | 0.38    |  | 0.44    | 0.51    | 0.29    | 0.40    | 0.51    |
| <b>J_C_rightconvex</b>    | 0.38    | 0.27    |  | 0.54    | 0.54    | 0.54    |  | 0.25    | 0.00    | 0.53    | 0.38    | 0.27    |
| <b>P_turning</b>          | 0.04    | 0.01    |  | 0.06    | 0.03    | 0.03    |  | 0.01    | 0.06    | 0.06    | 0.04    | 0.01    |
| <b>final_structure</b>    | neither | neither |  | neither | neither | neither |  | neither | neither | neither | neither | neither |
| <b>U_supported</b>        | False   | 0.00    |  | 0.00    | 0.00    | 0.00    |  | 0.00    | 0.00    | 0.00    | False   | 0.00    |
| <b>J_supported</b>        | False   | 0.00    |  | 0.00    | 0.00    | 0.00    |  | 0.00    | 0.00    | 0.00    | False   | 0.00    |

Table S6ev. Yemen Cantril U-shape ratings, 2006-2024

| KPI                    | Mean    | 2005 | 2006 | 2007 | 2008 | 2009    | 2010 | 2011 | 2012    | 2013 | 2014    | 2015 | 2016    | 2017 | 2018  | 2019 | 2020 | 2021 | 2022 | 2023 | 2024 |  |
|------------------------|---------|------|------|------|------|---------|------|------|---------|------|---------|------|---------|------|-------|------|------|------|------|------|------|--|
| <b>shape_class</b>     | neither |      |      |      |      | neither |      |      | neither |      | neither |      | neither |      | U     |      |      |      |      |      |      |  |
| <b>U_beauty</b>        | 0.01    |      |      |      |      | 0.00    |      |      | 0.00    |      | 0.00    |      | 0.00    |      | 0.04  |      |      |      |      |      |      |  |
| <b>J_beauty</b>        | 0.00    |      |      |      |      | 0.00    |      |      | 0.00    |      | 0.00    |      | 0.00    |      | 0.00  |      |      |      |      |      |      |  |
| <b>Dominance</b>       | 0.90    |      |      |      |      |         |      |      |         |      |         |      |         |      |       |      |      |      |      |      |      |  |
| <b>best_df</b>         | 4.20    |      |      |      |      | 3.00    |      |      | 4.00    |      | 4.00    |      | 5.00    |      | 5.00  |      |      |      |      |      |      |  |
| <b>p_value</b>         | 0.09    |      |      |      |      | 0.00    |      |      | 0.31    |      | 0.12    |      | 0.00    |      | 0.00  |      |      |      |      |      |      |  |
| <b>lr_stat</b>         | 26.94   |      |      |      |      | 31.81   |      |      | 9.34    |      | 12.73   |      | 48.41   |      | 32.39 |      |      |      |      |      |      |  |
| <b>linear_aic</b>      | 31.80   |      |      |      |      | 26.88   |      |      | 16.35   |      | 14.34   |      | 56.21   |      | 45.24 |      |      |      |      |      |      |  |
| <b>spline_aic</b>      | 21.27   |      |      |      |      | 9.07    |      |      | 23.01   |      | 17.61   |      | 25.79   |      | 30.85 |      |      |      |      |      |      |  |
| <b>min_age</b>         | 86.99   |      |      |      |      |         |      |      |         |      | 90.31   |      | 91.25   |      | 79.41 |      |      |      |      |      |      |  |
| <b>min_value</b>       | 1.24    |      |      |      |      |         |      |      |         |      | 1.87    |      | -0.09   |      | 1.93  |      |      |      |      |      |      |  |
| <b>amplitude</b>       | 3.86    |      |      |      |      | 3.37    |      |      | 2.80    |      | 2.84    |      | 6.55    |      | 3.74  |      |      |      |      |      |      |  |
| <b>delta_endpoints</b> | -2.39   |      |      |      |      | -3.37   |      |      | -2.80   |      | -2.73   |      | -4.36   |      | 1.29  |      |      |      |      |      |      |  |
| <b>n_minima</b>        | 3.00    |      |      |      |      | 2.00    |      |      | 3.00    |      | 3.00    |      | 4.00    |      | 3.00  |      |      |      |      |      |      |  |
| <b>n_maxima</b>        | 2.80    |      |      |      |      | 2.00    |      |      | 3.00    |      | 2.00    |      | 4.00    |      | 3.00  |      |      |      |      |      |      |  |
| <b>turning_points</b>  | 5.80    |      |      |      |      | 4.00    |      |      | 6.00    |      | 5.00    |      | 8.00    |      | 6.00  |      |      |      |      |      |      |  |

|                           |         |         |         |         |         |      |
|---------------------------|---------|---------|---------|---------|---------|------|
| <b>r_trough</b>           | 0.96    | 1.00    | 1.00    | 0.98    | 0.99    | 0.83 |
| <b>interior_indicator</b> | False   | 0.00    | 0.00    | 0.00    | 0.00    | 1.00 |
| <b>trough_indicator</b>   | True    | 0.00    | 0.00    | 1.00    | 1.00    | 1.00 |
| <b>U_D_depth</b>          | 0.11    | 0.00    | 0.00    | 0.04    | 0.01    | 0.48 |
| <b>U_I_interiority</b>    | 0.03    | 0.00    | 0.00    | 0.00    | 0.00    | 0.17 |
| <b>U_M_monotonicity</b>   | 0.48    | 0.00    | 0.00    | 0.86    | 0.79    | 0.76 |
| <b>U_C_convexity</b>      | 0.43    | 0.00    | 0.05    | 0.76    | 0.68    | 0.65 |
| <b>U_S_symmetry</b>       | 0.17    | 0.00    | 0.00    | 0.08    | 0.04    | 0.74 |
| <b>J_R_rise</b>           | 0.07    | 0.00    | 0.00    | 0.00    | 0.00    | 0.35 |
| <b>J_M_monotonicity</b>   | 0.32    | 0.31    | 0.25    | 0.28    | 0.39    | 0.38 |
| <b>J_C_rightconvex</b>    | 0.47    | 0.43    | 0.50    | 0.45    | 0.46    | 0.51 |
| <b>P_turning</b>          | 0.05    | 0.12    | 0.03    | 0.06    | 0.01    | 0.03 |
| <b>final_structure</b>    | neither | neither | neither | neither | neither | U    |
| <b>U_supported</b>        | False   | 0.00    | 0.00    | 0.00    | 0.00    | 1.00 |
| <b>J_supported</b>        | False   | 0.00    | 0.00    | 0.00    | 0.00    | 0.00 |

Table S6ew. Zambia Cantril U-shape ratings, 2006-2024

| KPI                       | Mean    | 2005 | 2006 | 2007 | 2008 | 2009 | 2010 | 2011 | 2012 | 2013 | 2014 | 2015 | 2016 | 2017    | 2018  | 2019 | 2020 | 2021 | 2022 | 2023 | 2024    |
|---------------------------|---------|------|------|------|------|------|------|------|------|------|------|------|------|---------|-------|------|------|------|------|------|---------|
| <b>shape_class</b>        | neither |      |      |      |      |      |      |      |      |      |      |      |      | neither | U     |      |      |      |      |      | neither |
| <b>U_beauty</b>           | 0.01    |      |      |      |      |      |      |      |      |      |      |      |      | 0.00    | 0.04  |      |      |      |      |      | 0.00    |
| <b>J_beauty</b>           | 0.01    |      |      |      |      |      |      |      |      |      |      |      |      | 0.00    | 0.02  |      |      |      |      |      | 0.00    |
| <b>Dominance</b>          | 0.42    |      |      |      |      |      |      |      |      |      |      |      |      |         | 0.42  |      |      |      |      |      |         |
| <b>best_df</b>            | 5.00    |      |      |      |      |      |      |      |      |      |      |      |      | 5.00    | 5.00  |      |      |      |      |      | 5.00    |
| <b>p_value</b>            | 0.00    |      |      |      |      |      |      |      |      |      |      |      |      | 0.00    | 0.00  |      |      |      |      |      | 0.00    |
| <b>lr_stat</b>            | 49.70   |      |      |      |      |      |      |      |      |      |      |      |      | 36.06   | 57.59 |      |      |      |      |      | 55.43   |
| <b>linear_aic</b>         | 47.08   |      |      |      |      |      |      |      |      |      |      |      |      | 39.30   | 51.09 |      |      |      |      |      | 50.86   |
| <b>spline_aic</b>         | 15.39   |      |      |      |      |      |      |      |      |      |      |      |      | 21.23   | 11.50 |      |      |      |      |      | 13.43   |
| <b>min_age</b>            | 70.38   |      |      |      |      |      |      |      |      |      |      |      |      |         | 70.38 |      |      |      |      |      |         |
| <b>min_value</b>          | 2.39    |      |      |      |      |      |      |      |      |      |      |      |      |         | 2.39  |      |      |      |      |      |         |
| <b>amplitude</b>          | 5.00    |      |      |      |      |      |      |      |      |      |      |      |      | 4.44    | 5.11  |      |      |      |      |      | 5.44    |
| <b>delta_endpoints</b>    | -0.96   |      |      |      |      |      |      |      |      |      |      |      |      | -4.44   | 3.99  |      |      |      |      |      | -2.43   |
| <b>n_minima</b>           | 3.00    |      |      |      |      |      |      |      |      |      |      |      |      | 3.00    | 3.00  |      |      |      |      |      | 3.00    |
| <b>n_maxima</b>           | 2.67    |      |      |      |      |      |      |      |      |      |      |      |      | 3.00    | 2.00  |      |      |      |      |      | 3.00    |
| <b>turning_points</b>     | 5.67    |      |      |      |      |      |      |      |      |      |      |      |      | 6.00    | 5.00  |      |      |      |      |      | 6.00    |
| <b>r_trough</b>           | 0.90    |      |      |      |      |      |      |      |      |      |      |      |      | 1.00    | 0.71  |      |      |      |      |      | 1.00    |
| <b>interior_indicator</b> | False   |      |      |      |      |      |      |      |      |      |      |      |      | 0.00    | 1.00  |      |      |      |      |      | 0.00    |
| <b>trough_indicator</b>   | False   |      |      |      |      |      |      |      |      |      |      |      |      | 0.00    | 1.00  |      |      |      |      |      | 0.00    |
| <b>U_D_depth</b>          | 0.07    |      |      |      |      |      |      |      |      |      |      |      |      | 0.00    | 0.22  |      |      |      |      |      | 0.00    |
| <b>U_I_interiority</b>    | 0.16    |      |      |      |      |      |      |      |      |      |      |      |      | 0.00    | 0.47  |      |      |      |      |      | 0.00    |
| <b>U_M_monotonicity</b>   | 0.26    |      |      |      |      |      |      |      |      |      |      |      |      | 0.00    | 0.79  |      |      |      |      |      | 0.00    |
| <b>U_C_convexity</b>      | 0.33    |      |      |      |      |      |      |      |      |      |      |      |      | 0.00    | 1.00  |      |      |      |      |      | 0.00    |
| <b>U_S_symmetry</b>       | 0.12    |      |      |      |      |      |      |      |      |      |      |      |      | 0.00    | 0.36  |      |      |      |      |      | 0.00    |
| <b>J_R_rise</b>           | 0.26    |      |      |      |      |      |      |      |      |      |      |      |      | 0.00    | 0.78  |      |      |      |      |      | 0.00    |
| <b>J_M_monotonicity</b>   | 0.41    |      |      |      |      |      |      |      |      |      |      |      |      | 0.34    | 0.56  |      |      |      |      |      | 0.34    |



Table S6ey. Year Summary Cantril U-shape ratings, 2006-2024

| KPI                       | Mean   | 2005    | 2006   | 2007   | 2008   | 2009   | 2010    | 2011    | 2012   | 2013   | 2014    | 2015   | 2016   | 2017    | 2018    | 2019   | 2020   | 2021    | 2022   | 2023   | 2024    | All   |
|---------------------------|--------|---------|--------|--------|--------|--------|---------|---------|--------|--------|---------|--------|--------|---------|---------|--------|--------|---------|--------|--------|---------|-------|
| <b>shape_class</b>        | U      | neither | U      | U      | U      | U      | neither | neither | U      | U      | neither | U      | U      | neither | neither | U      | U      | neither | U      | U      | neither |       |
| <b>U_beauty</b>           | 0.11   | 0.00    | 0.01   | 0.24   | 0.01   | 0.03   | 0.00    | 0.00    | 0.00   | 0.01   | 0.00    | 0.08   | 0.06   | 0.00    | 0.00    | 0.52   | 0.15   | 0.00    | 0.09   | 0.12   | 0.00    |       |
| <b>J_beauty</b>           | 0.00   | 0.00    | 0.00   | 0.00   | 0.00   | 0.00   | 0.00    | 0.00    | 0.00   | 0.00   | 0.00    | 0.00   | 0.00   | 0.00    | 0.00    | 0.00   | 0.00   | 0.00    | 0.00   | 0.00   | 0.00    |       |
| <b>Dominance</b>          | 1.00   |         | 1.00   | 0.97   | 1.00   | 1.00   |         |         | 1.00   | 1.00   |         |        | 1.00   | 1.00    |         | 1.00   | 1.00   |         | 1.00   | 1.00   |         |       |
| <b>best_df</b>            | 5.00   | 5.00    | 5.00   | 5.00   | 5.00   | 5.00   | 3.00    | 5.00    | 3.00   | 3.00   | 5.00    | 3.00   | 3.00   | 3.00    | 3.00    | 4.00   | 4.00   | 5.00    | 3.00   | 3.00   | 5.00    |       |
| <b>p_value</b>            | 0.00   | 0.00    | 0.00   | 0.00   | 0.00   | 0.00   | 0.00    | 0.00    | 0.00   | 0.00   | 0.00    | 0.00   | 0.00   | 0.00    | 0.00    | 0.00   | 0.00   | 0.00    | 0.00   | 0.00   | 0.00    |       |
| <b>lr_stat</b>            | 43.41  | 71.92   | 66.37  | 76.12  | 42.60  | 56.63  | 64.16   | 70.62   | 57.92  | 81.49  | 51.79   | 70.41  | 62.11  | 75.79   | 35.93   | 59.99  | 57.62  | 62.81   | 68.38  | 60.03  | 61.37   |       |
| <b>linear_aic</b>         | -13.55 | -10.30  | -18.90 | 4.82   | -13.34 | -16.43 | -35.17  | -11.03  | -12.72 | -22.88 | -23.37  | -8.37  | -10.12 | -14.79  | -22.19  | -6.46  | -12.39 | -9.61   | -2.19  | -15.95 | 38.78   |       |
| <b>spline_aic</b>         | -38.96 | -64.22  | -67.26 | -53.29 | -37.94 | -55.06 | -85.33  | -63.65  | -56.64 | -90.37 | -57.17  | -64.78 | -58.23 | -76.57  | -44.12  | -50.45 | -54.00 | -54.42  | -56.57 | -61.98 | -4.59   |       |
| <b>min_age</b>            | 73.20  |         | 79.03  | 71.70  | 79.41  | 80.16  |         | 85.80   | 84.11  | 79.22  | 88.24   | 79.41  | 79.22  | 85.42   |         | 50.27  | 67.38  | 88.24   | 80.53  | 67.00  |         |       |
| <b>min_value</b>          | 6.24   |         | 4.96   | 5.12   | 4.95   | 5.05   |         | 5.11    | 5.05   | 5.01   | 4.91    | 5.11   | 5.16   | 5.18    |         | 5.76   | 5.54   | 5.01    | 5.31   | 5.55   |         |       |
| <b>amplitude</b>          | 0.60   | 1.08    | 0.93   | 0.92   | 1.04   | 0.96   | 0.93    | 0.89    | 0.86   | 0.96   | 1.04    | 0.82   | 0.86   | 0.93    | 1.02    | 0.59   | 0.68   | 1.14    | 0.85   | 0.66   | 4.27    |       |
| <b>delta_endpoints</b>    | -0.25  | -1.08   | -0.74  | 0.16   | -0.84  | -0.60  | -0.93   | -0.47   | -0.44  | -0.83  | -0.84   | -0.37  | -0.46  | -0.70   | -1.02   | -0.14  | -0.36  | -0.62   | -0.16  | -0.46  | -4.27   |       |
| <b>n_minima</b>           | 3.00   | 2.00    | 1.00   | 2.00   | 1.00   | 1.00   | 2.00    | 2.00    | 1.00   | 2.00   | 2.00    | 1.00   | 1.00   | 1.00    | 1.00    | 2.00   | 2.00   | 3.00    | 2.00   | 1.00   | 3.00    |       |
| <b>n_maxima</b>           | 2.00   | 2.00    | 1.00   | 1.00   | 1.00   | 1.00   | 2.00    | 1.00    | 0.00   | 2.00   | 1.00    | 0.00   | 0.00   | 0.00    | 1.00    | 2.00   | 1.00   | 2.00    | 1.00   | 0.00   | 3.00    |       |
| <b>turning_points</b>     | 5.00   | 4.00    | 2.00   | 3.00   | 2.00   | 2.00   | 4.00    | 3.00    | 1.00   | 4.00   | 3.00    | 1.00   | 1.00   | 1.00    | 2.00    | 4.00   | 3.00   | 5.00    | 3.00   | 1.00   | 6.00    |       |
| <b>r_trough</b>           | 0.75   | 1.00    | 0.83   | 0.73   | 0.83   | 0.84   | 1.00    | 0.92    | 0.89   | 0.83   | 0.95    | 0.83   | 0.83   | 0.91    | 1.00    | 0.44   | 0.67   | 0.95    | 0.85   | 0.67   | 1.00    |       |
| <b>interior_indicator</b> | TRUE   | FALSE   | TRUE   | TRUE   | TRUE   | TRUE   | FALSE   | FALSE   | TRUE   | TRUE   | FALSE   | TRUE   | TRUE   | FALSE   | FALSE   | TRUE   | TRUE   | FALSE   | TRUE   | TRUE   | FALSE   |       |
| <b>trough_indicator</b>   | TRUE   | FALSE   | TRUE   | TRUE   | TRUE   | TRUE   | FALSE   | TRUE    | TRUE   | TRUE   | TRUE    | TRUE   | TRUE   | TRUE    | FALSE   | TRUE   | TRUE   | TRUE    | TRUE   | TRUE   | TRUE    | FALSE |
| <b>U_D_depth</b>          | 0.58   | 0.00    | 0.21   | 0.83   | 0.19   | 0.37   | 0.00    | 0.47    | 0.49   | 0.13   | 0.18    | 0.55   | 0.46   | 0.24    | 0.00    | 0.76   | 0.47   | 0.46    | 0.81   | 0.31   | 0.00    |       |
| <b>U_I_interiority</b>    | 0.38   | 0.00    | 0.18   | 0.43   | 0.17   | 0.14   | 0.00    | 0.00    | 0.01   | 0.18   | 0.00    | 0.17   | 0.18   | 0.00    | 0.00    | 0.86   | 0.57   | 0.00    | 0.13   | 0.58   | 0.00    |       |
| <b>U_M_monotonicity</b>   | 0.83   | 0.00    | 0.87   | 0.88   | 0.86   | 0.92   | 0.00    | 0.96    | 1.00   | 0.87   | 0.96    | 1.00   | 1.00   | 1.00    | 0.00    | 0.91   | 0.84   | 0.91    | 0.94   | 1.00   | 0.00    |       |
| <b>U_C_convexity</b>      | 0.65   | 0.00    | 0.70   | 0.73   | 0.67   | 0.71   | 0.00    | 0.63    | 0.75   | 0.86   | 0.68    | 1.00   | 1.00   | 0.77    | 0.00    | 1.00   | 0.80   | 0.67    | 1.00   | 0.96   | 0.00    |       |
| <b>U_S_symmetry</b>       | 0.73   | 0.00    | 0.34   | 0.91   | 0.32   | 0.54   | 0.00    | 0.64    | 0.66   | 0.23   | 0.31    | 0.71   | 0.63   | 0.39    | 0.00    | 0.86   | 0.64   | 0.63    | 0.90   | 0.47   | 0.00    |       |
| <b>J_R_rise</b>           | 0.00   | 0.00    | 0.00   | 0.17   | 0.00   | 0.00   | 0.00    | 0.00    | 0.00   | 0.00   | 0.00    | 0.00   | 0.00   | 0.00    | 0.00    | 0.00   | 0.00   | 0.00    | 0.00   | 0.00   | 0.00    |       |
| <b>J_M_monotonicity</b>   | 0.33   | 0.22    | 0.13   | 0.21   | 0.13   | 0.14   | 0.16    | 0.16    | 0.11   | 0.25   | 0.12    | 0.17   | 0.17   | 0.09    | 0.13    | 0.46   | 0.24   | 0.22    | 0.26   | 0.34   | 0.33    |       |
| <b>J_C_rightconvex</b>    | 0.65   | 0.53    | 0.55   | 0.62   | 0.53   | 0.56   | 0.50    | 0.64    | 0.62   | 0.61   | 0.49    | 1.00   | 1.00   | 0.58    | 0.37    | 0.50   | 0.49   | 0.54    | 1.00   | 0.62   | 0.00    |       |
| <b>P_turning</b>          | 0.06   | 0.12    | 0.50   | 0.25   | 0.50   | 0.50   | 0.12    | 0.25    | 1.00   | 0.12   | 0.25    | 1.00   | 1.00   | 1.00    | 0.50    | 0.12   | 0.25   | 0.06    | 0.25   | 1.00   | 0.03    |       |
| <b>final_structure</b>    | U      | neither | U      | U      | U      | U      | neither | neither | U      | U      | neither | U      | U      | neither | neither | U      | U      | neither | U      | U      | neither |       |
| <b>U_supported</b>        | TRUE   | FALSE   | TRUE   | TRUE   | TRUE   | TRUE   | FALSE   | FALSE   | TRUE   | TRUE   | FALSE   | TRUE   | TRUE   | FALSE   | FALSE   | TRUE   | TRUE   | FALSE   | TRUE   | TRUE   | FALSE   |       |
| <b>J_supported</b>        | FALSE  | FALSE   | FALSE  | FALSE  | FALSE  | FALSE  | FALSE   | FALSE   | FALSE  | FALSE  | FALSE   | FALSE  | FALSE  | FALSE   | FALSE   | FALSE  | FALSE  | FALSE   | FALSE  | FALSE  | FALSE   | FALSE |

Table S6ez. Country Summary Cantril U-shape ratings, 2006-2024 (Afghanistan—Burundi)

| KPI                | Afgha   | Alban | Alger   | Angol | Argen   | Armen   | Austra | Austri  | Azerb   | Bahra | Bangla | Belar   | Belgi   | Beliz   | Benin   | Bhuta   | Boliv   | Bosni | Botsw   | Brazi | Burki | Burun |
|--------------------|---------|-------|---------|-------|---------|---------|--------|---------|---------|-------|--------|---------|---------|---------|---------|---------|---------|-------|---------|-------|-------|-------|
| <b>shape_class</b> | neither | U     | neither |       | neither | neither | U      | neither | neither |       | U      | neither | neither | neither | neither | neither | neither | U     | neither | U     | U     | U     |
| <b>U_beauty</b>    | 0.00    | 0.04  | 0.00    |       | 0.00    | 0.00    | 0.29   | 0.00    | 0.00    |       | 0.00   | 0.00    | 0.00    | 0.00    | 0.00    | 0.00    | 0.00    | 0.03  | 0.00    | 0.36  | 0.00  | 0.08  |
| <b>J_beauty</b>    | 0.00    | 0.00  | 0.00    |       | 0.00    | 0.00    | 0.01   | 0.00    | 0.00    |       | 0.00   | 0.00    | 0.00    | 0.00    | 0.00    | 0.00    | 0.00    | 0.00  | 0.00    | 0.01  | 0.00  | 0.00  |
| <b>Dominance</b>   |         | 1.00  |         |       |         |         | 0.95   |         |         |       | 1.00   |         |         |         |         |         |         |       |         | 1.00  | 1.00  | 1.00  |
| <b>best_df</b>     | 3.00    | 5.00  | 3.00    |       | 5.00    | 5.00    | 3.00   | 3.00    | 3.00    |       | 5.00   | 5.00    | 5.00    | 3.00    | 5.00    | 5.00    | 5.00    | 4.00  | 5.00    | 5.00  | 3.00  | 5.00  |
| <b>p_value</b>     | 0.01    | 0.00  | 0.00    |       | 0.00    | 0.00    | 0.00   | 0.00    | 0.00    |       | 0.01   | 0.00    | 0.00    | 0.00    | 0.00    | 0.00    | 0.00    | 0.00  | 0.00    | 0.00  | 0.00  | 0.05  |

|                           |         |        |         |  |         |         |        |         |         |  |       |         |         |         |         |         |        |         |        |        |        |        |
|---------------------------|---------|--------|---------|--|---------|---------|--------|---------|---------|--|-------|---------|---------|---------|---------|---------|--------|---------|--------|--------|--------|--------|
| <b>lr_stat</b>            | 18.16   | 52.28  | 68.99   |  | 37.05   | 40.94   | 63.42  | 20.55   | 57.34   |  | 23.09 | 44.90   | 52.09   | 49.42   | 51.09   | 58.23   | 70.73  | 61.33   | 26.45  | 75.65  | 52.44  | 17.14  |
| <b>linear_aic</b>         | -11.15  | 16.39  | 14.69   |  | -0.93   | -6.91   | -7.72  | -14.14  | 26.53   |  | -4.74 | 11.28   | -33.75  | 59.41   | 16.96   | 18.63   | 3.78   | 7.06    | -8.56  | 9.37   | -8.53  | -21.50 |
| <b>spline_aic</b>         | -15.31  | -17.89 | -40.30  |  | -19.98  | -29.86  | -57.14 | -20.69  | -16.80  |  | -9.83 | -15.62  | -67.83  | 23.99   | -16.13  | -21.60  | -48.95 | -38.27  | -17.01 | -48.28 | -46.97 | -20.63 |
| <b>min_age</b>            |         | 72.45  |         |  | 89.37   |         | 49.33  |         |         |  | 81.10 |         | 91.25   |         | 90.50   |         |        | 80.91   |        | 54.03  | 84.48  | 62.49  |
| <b>min_value</b>          |         | 4.54   |         |  | 5.86    |         | 7.07   |         |         |  | 4.32  |         | 6.58    |         | 2.94    |         |        | 4.59    |        | 6.32   | 3.90   | 4.13   |
| <b>amplitude</b>          | 0.74    | 1.67   | 1.72    |  | 1.25    | 2.10    | 0.68   | 0.92    | 3.39    |  | 0.84  | 2.71    | 0.68    | 6.94    | 1.82    | 1.93    | 1.83   | 1.98    | 1.87   | 1.18   | 2.12   | 0.43   |
| <b>delta_endpoints</b>    | -0.73   | -1.17  | -1.64   |  | -1.04   | -2.10   | 0.25   | -0.92   | -3.39   |  | -0.79 | -2.71   | -0.68   | -6.94   | -1.40   | -1.74   | -1.83  | -1.33   | -1.87  | 0.50   | -1.68  | -0.14  |
| <b>n_minima</b>           | 3.00    | 2.00   | 3.00    |  | 3.00    | 1.00    | 3.00   | 3.00    | 1.00    |  | 2.00  | 2.00    | 4.00    | 2.00    | 3.00    | 2.00    | 1.00   | 1.00    | 1.00   | 3.00   | 1.00   | 3.00   |
| <b>n_maxima</b>           | 3.00    | 2.00   | 3.00    |  | 2.00    | 1.00    | 2.00   | 3.00    | 1.00    |  | 2.00  | 2.00    | 3.00    | 2.00    | 2.00    | 3.00    | 2.00   | 0.00    | 1.00   | 2.00   | 0.00   | 3.00   |
| <b>turning_points</b>     | 6.00    | 4.00   | 6.00    |  | 5.00    | 2.00    | 5.00   | 6.00    | 2.00    |  | 4.00  | 4.00    | 7.00    | 4.00    | 5.00    | 5.00    | 3.00   | 1.00    | 2.00   | 5.00   | 1.00   | 6.00   |
| <b>r_trough</b>           | 1.00    | 0.74   | 1.00    |  | 0.96    | 1.00    | 0.43   | 1.00    | 1.00    |  | 0.85  | 1.00    | 0.99    | 1.00    | 0.98    | 1.00    | 1.00   | 0.85    | 1.00   | 0.49   | 0.90   | 0.61   |
| <b>interior_indicator</b> | FALSE   | TRUE   | FALSE   |  | FALSE   | FALSE   | TRUE   | FALSE   | FALSE   |  | TRUE  | FALSE   | FALSE   | FALSE   | FALSE   | FALSE   | FALSE  | TRUE    | FALSE  | TRUE   | TRUE   | TRUE   |
| <b>trough_indicator</b>   | FALSE   | TRUE   | FALSE   |  | TRUE    | FALSE   | TRUE   | FALSE   | FALSE   |  | TRUE  | FALSE   | TRUE    | FALSE   | TRUE    | FALSE   | FALSE  | TRUE    | FALSE  | TRUE   | TRUE   | TRUE   |
| <b>U_D_depth</b>          | 0.00    | 0.30   | 0.00    |  | 0.17    | 0.00    | 0.64   | 0.00    | 0.00    |  | 0.06  | 0.00    | 0.00    | 0.00    | 0.08    | 0.00    | 0.00   | 0.33    | 0.00   | 0.58   | 0.21   | 0.28   |
| <b>U_I_interiority</b>    | 0.00    | 0.40   | 0.00    |  | 0.00    | 0.00    | 0.83   | 0.00    | 0.00    |  | 0.11  | 0.00    | 0.00    | 0.00    | 0.00    | 0.00    | 0.12   | 0.00    | 0.98   | 0.00   | 0.73   |        |
| <b>U_M_monotonicity</b>   | 0.00    | 0.70   | 0.00    |  | 0.87    | 0.00    | 0.78   | 0.00    | 0.00    |  | 0.75  | 0.00    | 0.86    | 0.00    | 0.74    | 0.00    | 1.00   | 0.00    | 0.89   | 1.00   | 0.68   |        |
| <b>U_C_convexity</b>      | 0.00    | 0.70   | 0.00    |  | 0.65    | 0.00    | 0.80   | 0.00    | 0.00    |  | 0.57  | 0.00    | 0.86    | 0.00    | 0.73    | 0.00    | 0.99   | 0.00    | 0.78   | 0.96   | 0.71   |        |
| <b>U_S_symmetry</b>       | 0.00    | 0.46   | 0.00    |  | 0.29    | 0.00    | 0.78   | 0.00    | 0.00    |  | 0.12  | 0.00    | 0.01    | 0.00    | 0.17    | 0.00    | 0.50   | 0.00    | 0.73   | 0.34   | 0.63   |        |
| <b>J_R_rise</b>           | 0.00    | 0.00   | 0.00    |  | 0.00    | 0.00    | 0.36   | 0.00    | 0.00    |  | 0.00  | 0.00    | 0.00    | 0.00    | 0.00    | 0.00    | 0.00   | 0.00    | 0.42   | 0.00   | 0.00   |        |
| <b>J_M_monotonicity</b>   | 0.40    | 0.28   | 0.44    |  | 0.27    | 0.10    | 0.51   | 0.39    | 0.12    |  | 0.25  | 0.15    | 0.26    | 0.31    | 0.46    | 0.44    | 0.32   | 0.15    | 0.11   | 0.41   | 0.10   | 0.38   |
| <b>J_C_rightconvex</b>    | 0.39    | 0.44   | 0.39    |  | 0.52    | 0.47    | 0.74   | 0.52    | 0.35    |  | 0.45  | 0.56    | 0.38    | 0.00    | 0.44    | 0.20    | 0.00   | 0.98    | 0.49   | 0.55   | 0.97   | 0.43   |
| <b>P_turning</b>          | 0.03    | 0.12   | 0.03    |  | 0.06    | 0.50    | 0.06   | 0.03    | 0.50    |  | 0.12  | 0.12    | 0.01    | 0.12    | 0.06    | 0.06    | 0.25   | 1.00    | 0.50   | 0.06   | 1.00   | 0.03   |
| <b>final_structure</b>    | neither | U      | neither |  | neither | neither | U      | neither | neither |  | U     | neither | neither | neither | neither | neither | U      | neither | U      | U      | U      | U      |
| <b>U_supported</b>        | FALSE   | TRUE   | FALSE   |  | FALSE   | FALSE   | TRUE   | FALSE   | FALSE   |  | TRUE  | FALSE   | FALSE   | FALSE   | FALSE   | FALSE   | FALSE  | TRUE    | FALSE  | TRUE   | TRUE   | TRUE   |
| <b>J_supported</b>        | FALSE   | FALSE  | FALSE   |  | FALSE   | FALSE   | FALSE  | FALSE   | FALSE   |  | FALSE | FALSE   | FALSE   | FALSE   | FALSE   | FALSE   | FALSE  | FALSE   | FALSE  | FALSE  | FALSE  | FALSE  |

Table S6ez. Country Summary Cantril U-shape ratings, 2006-2024 (Cambodia—Egypt)

| KPI                    | Cambo  | Camer   | Canad  | CAR | Chad    | Chile  | China  | Colom   | Comor   | Con.B | Con.K   | Costa  | Croat   | Cuba | Cypru   | Czech   | Denma   | Djibo   | Domin  | Ecuad  | Egypt  |         |
|------------------------|--------|---------|--------|-----|---------|--------|--------|---------|---------|-------|---------|--------|---------|------|---------|---------|---------|---------|--------|--------|--------|---------|
| <b>shape_class</b>     | U      | neither | J      |     | neither | U      | U      | neither | neither | U     | neither | U      | neither |      | neither | neither | neither | neither | U      | U      |        | neither |
| <b>U_beauty</b>        | 0.09   | 0.00    | 0.00   |     | 0.00    | 0.16   | 0.57   | 0.00    | 0.00    | 0.00  | 0.00    | 0.21   | 0.00    |      | 0.00    | 0.00    | 0.00    | 0.00    | 0.43   | 0.00   | 0.00   | 0.00    |
| <b>J_beauty</b>        | 0.00   | 0.00    | 0.00   |     | 0.00    | 0.00   | 0.01   | 0.00    | 0.00    | 0.00  | 0.00    | 0.02   | 0.00    |      | 0.00    | 0.00    | 0.00    | 0.00    | 0.00   | 0.00   | 0.00   | 0.00    |
| <b>Dominance</b>       | 0.90   | -1.00   | -1.00  |     |         | 1.00   | 0.96   | -1.00   |         | 1.00  | -1.00   | 0.84   |         |      |         |         |         |         | 1.00   | 1.00   |        |         |
| <b>best_df</b>         | 5.00   | 4.00    | 5.00   |     | 5.00    | 5.00   | 3.00   | 3.00    | 5.00    | 5.00  | 3.00    | 5.00   | 5.00    |      | 5.00    | 5.00    | 5.00    | 5.00    | 4.00   | 3.00   | 3.00   | 3.00    |
| <b>p_value</b>         | 0.00   | 0.00    | 0.00   |     | 0.00    | 0.00   | 0.00   | 0.00    | 0.00    | 0.02  | 0.00    | 0.00   | 0.00    |      | 0.00    | 0.00    | 0.00    | 0.01    | 0.00   | 0.00   | 0.00   | 0.00    |
| <b>lr_stat</b>         | 57.69  | 60.05   | 43.30  |     | 38.90   | 61.37  | 57.59  | 52.85   | 30.23   | 19.91 | 32.67   | 58.50  | 49.39   |      | 91.14   | 37.84   | 58.28   | 21.41   | 75.24  | 33.94  | 38.58  | 38.58   |
| <b>linear_aic</b>      | 11.38  | 23.97   | -16.94 |     | 8.22    | 7.54   | 7.07   | 13.91   | 2.52    | -4.63 | 34.91   | 11.71  | 3.51    |      | 11.30   | -20.31  | -8.12   | 25.50   | 27.59  | -10.09 | 14.22  | 14.22   |
| <b>spline_aic</b>      | -28.31 | -20.08  | -42.24 |     | -12.68  | -35.83 | -36.52 | -24.94  | -9.71   | -6.54 | 16.25   | -28.79 | -27.88  |      | -61.84  | -40.15  | -48.40  | 22.09   | -31.65 | -30.03 | -10.37 | -10.37  |
| <b>min_age</b>         | 77.90  | 85.98   | 22.26  |     |         | 65.68  | 48.02  | 85.98   | 89.74   | 83.17 | 86.36   | 72.08  |         |      | 86.92   |         | 89.56   |         | 57.60  | 79.59  |        |         |
| <b>min_value</b>       | 4.01   | 3.29    | 7.06   |     |         | 5.86   | 5.05   | 5.68    | 3.34    | 3.46  | 2.07    | 6.86   |         |      | 5.76    |         | 7.32    |         | 4.68   | 4.78   |        |         |
| <b>amplitude</b>       | 1.15   | 2.24    | 0.71   |     | 1.29    | 1.32   | 0.89   | 1.15    | 1.02    | 1.74  | 2.99    | 1.15   | 3.08    |      | 1.31    | 2.20    | 0.69    | 1.94    | 1.94   | 1.78   | 1.67   | 1.67    |
| <b>delta_endpoints</b> | 0.42   | 0.32    | 0.08   |     | -0.72   | -0.67  | 0.08   | 0.01    | -0.76   | -1.44 | 0.56    | 0.32   | -3.08   |      | -0.24   | -2.20   | -0.26   | -1.07   | -0.59  | -1.74  | -1.67  | -1.67   |
| <b>n_minima</b>        | 3.00   | 3.00    | 3.00   |     | 3.00    | 3.00   | 1.00   | 3.00    | 3.00    | 3.00  | 3.00    | 2.00   | 1.00    |      | 3.00    | 1.00    | 3.00    | 4.00    | 2.00   | 2.00   | 1.00   | 1.00    |
| <b>n_maxima</b>        | 2.00   | 2.00    | 3.00   |     | 3.00    | 3.00   | 1.00   | 2.00    | 2.00    | 3.00  | 2.00    | 1.00   | 1.00    |      | 2.00    | 1.00    | 2.00    | 4.00    | 1.00   | 2.00   | 1.00   | 1.00    |
| <b>turning_points</b>  | 5.00   | 5.00    | 6.00   |     | 6.00    | 6.00   | 2.00   | 5.00    | 5.00    | 6.00  | 5.00    | 3.00   | 2.00    |      | 5.00    | 2.00    | 5.00    | 8.00    | 3.00   | 4.00   | 2.00   | 2.00    |

|                           |       |         |       |         |       |       |         |         |       |         |       |         |         |         |         |         |       |       |         |
|---------------------------|-------|---------|-------|---------|-------|-------|---------|---------|-------|---------|-------|---------|---------|---------|---------|---------|-------|-------|---------|
| <b>r_trough</b>           | 0.81  | 0.92    | 0.07  | 1.00    | 0.65  | 0.41  | 0.92    | 0.97    | 0.88  | 0.92    | 0.73  | 1.00    | 0.93    | 1.00    | 0.97    | 1.00    | 0.54  | 0.83  | 1.00    |
| <b>interior_indicator</b> | TRUE  | FALSE   | FALSE | FALSE   | TRUE  | TRUE  | FALSE   | FALSE   | TRUE  | FALSE   | TRUE  | FALSE   | FALSE   | FALSE   | FALSE   | FALSE   | TRUE  | TRUE  | FALSE   |
| <b>trough_indicator</b>   | TRUE  | TRUE    | TRUE  | FALSE   | TRUE  | TRUE  | TRUE    | TRUE    | TRUE  | TRUE    | TRUE  | FALSE   | TRUE    | FALSE   | TRUE    | FALSE   | TRUE  | TRUE  | FALSE   |
| <b>U_D_depth</b>          | 0.63  | 0.86    | 0.51  | 0.00    | 0.49  | 0.81  | 0.99    | 0.24    | 0.17  | 0.81    | 0.73  | 0.00    | 0.82    | 0.00    | 0.22    | 0.00    | 0.69  | 0.02  | 0.00    |
| <b>U_I_interiority</b>    | 0.22  | 0.00    | 0.00  | 0.00    | 0.63  | 0.78  | 0.00    | 0.00    | 0.04  | 0.00    | 0.41  | 0.00    | 0.00    | 0.00    | 0.00    | 0.00    | 0.90  | 0.16  | 0.00    |
| <b>U_M_monotonicity</b>   | 0.88  | 0.86    | 0.87  | 0.00    | 0.82  | 0.95  | 0.85    | 0.80    | 0.81  | 0.87    | 0.88  | 0.00    | 0.75    | 0.00    | 0.60    | 0.00    | 0.89  | 0.82  | 0.00    |
| <b>U_C_convexity</b>      | 0.71  | 0.72    | 0.65  | 0.05    | 0.73  | 1.00  | 0.75    | 0.67    | 0.65  | 0.80    | 0.81  | 0.00    | 0.66    | 0.80    | 0.72    | 0.00    | 0.85  | 0.80  | 0.00    |
| <b>U_S_symmetry</b>       | 0.78  | 0.92    | 0.90  | 0.00    | 0.66  | 0.95  | 0.99    | 0.39    | 0.29  | 0.90    | 0.84  | 0.00    | 0.90    | 0.00    | 0.55    | 0.00    | 0.82  | 0.04  | 0.00    |
| <b>J_R_rise</b>           | 0.37  | 0.14    | 0.11  | 0.00    | 0.00  | 0.09  | 0.01    | 0.00    | 0.00  | 0.19    | 0.27  | 0.00    | 0.00    | 0.00    | 0.00    | 0.00    | 0.00  | 0.00  | 0.00    |
| <b>J_M_monotonicity</b>   | 0.37  | 0.32    | 0.71  | 0.41    | 0.33  | 0.53  | 0.33    | 0.39    | 0.32  | 0.30    | 0.43  | 0.09    | 0.48    | 0.06    | 0.65    | 0.54    | 0.36  | 0.16  | 0.45    |
| <b>J_C_rightconvex</b>    | 0.68  | 0.52    | 0.18  | 0.45    | 0.55  | 0.35  | 0.54    | 0.50    | 0.51  | 0.56    | 0.75  | 0.48    | 0.52    | 0.57    | 0.45    | 0.36    | 0.74  | 0.57  | 0.38    |
| <b>P_turning</b>          | 0.06  | 0.06    | 0.03  | 0.03    | 0.03  | 0.50  | 0.06    | 0.06    | 0.03  | 0.06    | 0.25  | 0.50    | 0.06    | 0.50    | 0.06    | 0.06    | 0.01  | 0.25  | 0.12    |
| <b>final_structure</b>    | U     | neither | J     | neither | U     | U     | neither | neither | U     | neither | U     | neither | neither | neither | neither | neither | U     | U     | neither |
| <b>U_supported</b>        | TRUE  | FALSE   | FALSE | FALSE   | TRUE  | TRUE  | FALSE   | FALSE   | TRUE  | FALSE   | TRUE  | FALSE   | FALSE   | FALSE   | FALSE   | FALSE   | TRUE  | TRUE  | FALSE   |
| <b>J_supported</b>        | FALSE | FALSE   | TRUE  | FALSE   | FALSE | FALSE | FALSE   | FALSE   | FALSE | FALSE   | FALSE | FALSE   | FALSE   | FALSE   | FALSE   | FALSE   | FALSE | FALSE | FALSE   |

Table S6ez. Country Summary Cantril U-shape ratings, 2006-2024 (El Salvador—India)

| KPI                       | ElSal   | Eston  | Eswat   | Ethio   | Finla   | Franc   | Gabon   | Gambi   | Georg   | Germa   | Ghana   | Grec    | Guate   | Guine   | Guyan   | Haiti   | Hondu  | HongK   | Hunga  | Icela   | India |
|---------------------------|---------|--------|---------|---------|---------|---------|---------|---------|---------|---------|---------|---------|---------|---------|---------|---------|--------|---------|--------|---------|-------|
| <b>shape_class</b>        | neither | U      | neither | U      | neither | U      | neither |       |
| <b>U_beauty</b>           | 0.00    | 0.19   | 0.00    | 0.00    | 0.00    | 0.00    | 0.00    | 0.00    | 0.00    | 0.00    | 0.00    | 0.00    | 0.00    | 0.00    | 0.00    | 0.00    | 0.03   | 0.00    | 0.03   | 0.00    |       |
| <b>J_beauty</b>           | 0.00    | 0.00   | 0.00    | 0.00    | 0.00    | 0.00    | 0.00    | 0.00    | 0.00    | 0.00    | 0.00    | 0.00    | 0.00    | 0.00    | 0.00    | 0.00    | 0.00   | 0.00    | 0.00   | 0.00    |       |
| <b>Dominance</b>          |         | 1.00   |         |         |         |         |         |         |         |         |         |         |         |         |         |         | 1.00   |         | 1.00   |         |       |
| <b>best_df</b>            | 5.00    | 3.00   | 4.00    | 5.00    | 4.00    | 4.00    | 5.00    | 5.00    | 3.00    | 5.00    | 3.00    | 5.00    | 4.00    | 5.00    |         | 5.00    | 5.00   | 4.00    | 5.00   | 4.00    | 5.00  |
| <b>p_value</b>            | 0.00    | 0.00   | 0.00    | 0.00    | 0.00    | 0.00    | 0.00    | 0.00    | 0.00    | 0.00    | 0.00    | 0.00    | 0.00    | 0.00    | 0.02    | 0.00    | 0.00   | 0.00    | 0.00   | 0.02    |       |
| <b>lr_stat</b>            | 60.07   | 87.28  | 65.84   | 31.30   | 61.89   | 26.82   | 31.05   | 29.54   | 89.12   | 30.02   | 38.15   | 67.46   | 67.45   | 31.58   | 19.66   | 49.55   | 33.75  | 75.01   | 50.59  | 19.85   |       |
| <b>linear_aic</b>         | 9.86    | 12.06  | -5.38   | -11.31  | 3.09    | -27.16  | 0.01    | 8.15    | 18.67   | -28.13  | 18.02   | -8.76   | 10.21   | 8.66    | -4.61   | 24.30   | -19.46 | 14.98   | -12.72 | -36.96  |       |
| <b>spline_aic</b>         | -32.20  | -61.22 | -55.21  | -24.61  | -42.80  | -37.97  | -13.03  | -3.39   | -56.45  | -40.15  | -6.13   | -58.22  | -41.24  | -4.92   | -6.27   | -7.25   | -37.21 | -42.03  | -47.31 | -38.81  |       |
| <b>min_age</b>            | 88.05   | 77.15  |         | 89.18   |         |         | 86.92   | 87.68   | 85.05   |         |         | 88.80   |         |         | 88.99   |         | 70.95  | 85.23   | 27.71  |         |       |
| <b>min_value</b>          | 5.38    | 5.24   |         | 3.53    |         |         | 3.89    | 3.86    | 3.35    |         |         | 4.83    |         |         | 3.06    |         | 5.19   | 5.05    | 7.28   |         |       |
| <b>amplitude</b>          | 1.50    | 1.30   | 1.95    | 1.29    | 1.25    | 0.78    | 1.41    | 1.28    | 2.24    | 0.91    | 1.94    | 1.91    | 2.45    | 1.44    | 1.05    | 3.59    | 0.83   | 1.71    | 0.60   | 0.64    |       |
| <b>delta_endpoints</b>    | -0.99   | -0.22  | -1.95   | -1.12   | -1.25   | -0.76   | -0.80   | -0.65   | -0.63   | -0.89   | -1.77   | -1.63   | -2.45   | -0.92   | -0.41   | -3.59   | -0.67  | -0.74   | -0.28  | -0.60   |       |
| <b>n_minima</b>           | 2.00    | 2.00   | 1.00    | 3.00    | 2.00    | 3.00    | 4.00    | 4.00    | 1.00    | 2.00    | 1.00    | 2.00    | 1.00    | 3.00    | 3.00    | 2.00    | 4.00   | 2.00    | 3.00   | 3.00    |       |
| <b>n_maxima</b>           | 1.00    | 1.00   | 1.00    | 2.00    | 2.00    | 4.00    | 3.00    | 3.00    | 0.00    | 3.00    | 2.00    | 1.00    | 1.00    | 4.00    | 3.00    | 2.00    | 3.00   | 1.00    | 3.00   | 4.00    |       |
| <b>turning_points</b>     | 3.00    | 3.00   | 2.00    | 5.00    | 4.00    | 7.00    | 7.00    | 7.00    | 1.00    | 5.00    | 3.00    | 3.00    | 2.00    | 7.00    | 6.00    | 4.00    | 7.00   | 3.00    | 6.00   | 7.00    |       |
| <b>r_trough</b>           | 0.95    | 0.80   | 1.00    | 0.96    | 1.00    | 1.00    | 0.93    | 0.94    | 0.91    | 1.00    | 1.00    | 0.96    | 1.00    | 1.00    | 0.96    | 1.00    | 0.72   | 0.91    | 0.14   | 1.00    |       |
| <b>interior_indicator</b> | FALSE   | TRUE   | FALSE   | TRUE   | FALSE   | TRUE   | FALSE   |       |
| <b>trough_indicator</b>   | TRUE    | TRUE   | FALSE   | TRUE    | FALSE   | FALSE   | TRUE    | TRUE    | TRUE    | FALSE   | FALSE   | TRUE    | FALSE   | FALSE   | TRUE    | FALSE   | TRUE   | TRUE    | TRUE   | FALSE   |       |
| <b>U_D_depth</b>          | 0.34    | 0.83   | 0.00    | 0.13    | 0.00    | 0.00    | 0.44    | 0.49    | 0.72    | 0.00    | 0.00    | 0.15    | 0.00    | 0.00    | 0.54    | 0.00    | 0.19   | 0.57    | 0.54   | 0.00    |       |
| <b>U_I_interiority</b>    | 0.00    | 0.24   | 0.00    | 0.00    | 0.00    | 0.00    | 0.00    | 0.00    | 0.00    | 0.00    | 0.00    | 0.00    | 0.00    | 0.00    | 0.00    | 0.00    | 0.45   | 0.00    | 0.11   | 0.00    |       |
| <b>U_M_monotonicity</b>   | 0.89    | 0.98   | 0.00    | 0.86    | 0.00    | 0.00    | 0.86    | 0.75    | 1.00    | 0.00    | 0.00    | 0.92    | 0.00    | 0.00    | 0.83    | 0.00    | 0.72   | 0.94    | 0.78   | 0.00    |       |
| <b>U_C_convexity</b>      | 0.66    | 1.00   | 0.00    | 0.73    | 0.00    | 0.00    | 0.61    | 0.63    | 0.77    | 0.05    | 0.00    | 0.70    | 0.00    | 0.00    | 0.68    | 0.00    | 0.80   | 0.61    | 1.00   | 0.00    |       |
| <b>U_S_symmetry</b>       | 0.51    | 0.91   | 0.00    | 0.23    | 0.00    | 0.00    | 0.61    | 0.66    | 0.83    | 0.00    | 0.00    | 0.25    | 0.00    | 0.00    | 0.74    | 0.00    | 0.32   | 0.72    | 0.70   | 0.00    |       |
| <b>J_R_rise</b>           | 0.00    | 0.00   | 0.00    | 0.00    | 0.00    | 0.00    | 0.00    | 0.00    | 0.00    | 0.00    | 0.00    | 0.00    | 0.00    | 0.00    | 0.00    | 0.00    | 0.00   | 0.00    | 0.00   | 0.00    |       |
| <b>J_M_monotonicity</b>   | 0.25    | 0.23   | 0.17    | 0.30    | 0.40    | 0.33    | 0.31    | 0.46    | 0.09    | 0.26    | 0.18    | 0.20    | 0.31    | 0.45    | 0.34    | 0.21    | 0.37   | 0.19    | 0.53   | 0.26    |       |

|                        |         |       |         |         |         |         |         |         |         |         |         |         |         |         |         |         |       |         |       |         |
|------------------------|---------|-------|---------|---------|---------|---------|---------|---------|---------|---------|---------|---------|---------|---------|---------|---------|-------|---------|-------|---------|
| <b>J_C_rightconvex</b> | 0.51    | 1.00  | 0.06    | 0.41    | 0.22    | 0.43    | 0.63    | 0.53    | 0.59    | 0.45    | 0.40    | 0.44    | 0.36    | 0.46    | 0.51    | 0.42    | 0.55  | 0.64    | 0.53  | 0.45    |
| <b>P_turning</b>       | 0.25    | 0.25  | 0.50    | 0.06    | 0.12    | 0.01    | 0.01    | 0.01    | 1.00    | 0.06    | 0.25    | 0.25    | 0.50    | 0.01    | 0.03    | 0.12    | 0.01  | 0.25    | 0.03  | 0.01    |
| <b>final_structure</b> | neither | U     | neither | U     | neither | U     | neither |
| <b>U_supported</b>     | FALSE   | TRUE  | FALSE   | TRUE  | FALSE   | TRUE  | FALSE   |
| <b>J_supported</b>     | FALSE   | FALSE | FALSE   | FALSE   | FALSE   | FALSE   | FALSE   | FALSE   | FALSE   | FALSE   | FALSE   | FALSE   | FALSE   | FALSE   | FALSE   | FALSE   | FALSE | FALSE   | FALSE | FALSE   |

Table S6ez. Country Summary Cantril U-shape ratings, 2006-2024 (Indonesia—Lithuania)

| KPI                       | Indon   | Iran    | Iraq  | Irela  | Israe   | Italy  | Ivory   | Jamai | Japan   | Jorda  | Kazak   | Kenya   | Kosov   | Kuwai  | Kyrgy   | Laos   | Latvi   | Leban   | Lesot  | Liber   | Libya | Lithu |
|---------------------------|---------|---------|-------|--------|---------|--------|---------|-------|---------|--------|---------|---------|---------|--------|---------|--------|---------|---------|--------|---------|-------|-------|
| <b>shape_class</b>        | neither | neither | U     | U      | neither | U      | neither | U     | neither | U      | neither | neither | neither | U      | neither | U      | neither | neither | U      | neither |       |       |
| <b>U_beauty</b>           | 0.00    | 0.00    | 0.04  | 0.16   | 0.00    | 0.03   | 0.00    | 0.12  | 0.00    | 0.31   | 0.00    | 0.00    | 0.00    | 0.08   | 0.00    | 0.04   | 0.00    | 0.00    | 0.16   | 0.00    |       |       |
| <b>J_beauty</b>           | 0.00    | 0.00    | 0.00  | 0.01   | 0.00    | 0.00   | 0.00    | 0.00  | 0.00    | 0.00   | 0.00    | 0.00    | 0.01    | 0.00   | 0.01    | 0.00   | 0.00    | 0.00    | 0.01   | 0.00    |       |       |
| <b>Dominance</b>          |         |         | 1.00  | 0.84   |         | 1.00   |         | 0.99  |         | 1.00   | -1.00   | -1.00   | -1.00   | 0.98   | -1.00   | 1.00   |         |         | 0.91   |         |       |       |
| <b>best_df</b>            | 3.00    | 5.00    | 5.00  | 5.00   | 5.00    | 5.00   | 5.00    | 5.00  | 5.00    | 5.00   | 5.00    | 5.00    | 5.00    | 5.00   | 3.00    | 5.00   | 5.00    | 3.00    | 3.00   | 5.00    |       |       |
| <b>p_value</b>            | 0.00    | 0.00    | 0.02  | 0.00   | 0.00    | 0.00   | 0.00    | 0.00  | 0.00    | 0.00   | 0.00    | 0.00    | 0.00    | 0.00   | 0.00    | 0.00   | 0.00    | 0.00    | 0.00   | 0.00    |       |       |
| <b>lr_stat</b>            | 24.61   | 34.17   | 19.07 | 72.58  | 44.54   | 68.56  | 78.86   | 39.70 | 68.86   | 47.83  | 68.79   | 28.10   | 63.24   | 56.79  | 74.75   | 33.26  | 62.97   | 29.71   | 43.04  | 48.19   |       |       |
| <b>linear_aic</b>         | -6.37   | 4.90    | 8.24  | 0.45   | 14.66   | -4.33  | 29.51   | 23.61 | 5.09    | 12.55  | -7.85   | 20.44   | 29.82   | 5.77   | 21.49   | 2.69   | 15.06   | 9.09    | 15.90  | -14.65  |       |       |
| <b>spline_aic</b>         | -16.98  | -11.27  | 7.17  | -54.13 | -11.89  | -54.89 | -31.35  | 1.91  | -45.78  | -17.29 | -58.64  | 10.34   | -15.42  | -33.02 | -39.26  | -12.56 | -29.91  | -6.62   | -13.14 | -44.83  |       |       |
| <b>min_age</b>            |         | 89.56   | 77.90 | 46.14  |         | 78.28  | 87.68   | 54.59 | 85.42   | 59.11  | 87.30   | 87.86   | 85.61   | 80.16  | 23.02   | 79.41  | 86.74   |         | 63.99  | 88.05   |       |       |
| <b>min_value</b>          |         | 4.09    | 4.63  | 6.90   |         | 6.06   | 2.13    | 5.50  | 5.85    | 4.69   | 5.53    | 3.70    | 5.13    | 4.78   | 4.99    | 5.02   | 3.76    |         | 3.84   | 4.85    |       |       |
| <b>amplitude</b>          | 1.15    | 1.65    | 1.04  | 1.08   | 2.75    | 0.90   | 3.19    | 2.05  | 0.96    | 1.16   | 0.76    | 1.54    | 2.28    | 1.02   | 2.01    | 1.24   | 1.64    | 1.85    | 1.54   | 2.02    |       |       |
| <b>delta_endpoints</b>    | -1.15   | -1.37   | -0.18 | 0.59   | -2.75   | -0.56  | -0.72   | 1.29  | -0.10   | -0.35  | 0.00    | 0.37    | 0.90    | 0.13   | 1.84    | -0.70  | -0.40   | -1.85   | 0.85   | -1.49   |       |       |
| <b>n_minima</b>           | 1.00    | 3.00    | 3.00  | 3.00   | 3.00    | 2.00   | 2.00    | 5.00  | 3.00    | 3.00   | 3.00    | 4.00    | 2.00    | 3.00   | 4.00    | 2.00   | 2.00    | 2.00    | 3.00   | 3.00    |       |       |
| <b>n_maxima</b>           | 1.00    | 2.00    | 3.00  | 2.00   | 3.00    | 2.00   | 1.00    | 4.00  | 2.00    | 2.00   | 2.00    | 3.00    | 1.00    | 3.00   | 3.00    | 2.00   | 1.00    | 2.00    | 2.00   | 2.00    |       |       |
| <b>turning_points</b>     | 2.00    | 5.00    | 6.00  | 5.00   | 6.00    | 4.00   | 3.00    | 9.00  | 5.00    | 5.00   | 5.00    | 7.00    | 3.00    | 6.00   | 7.00    | 4.00   | 3.00    | 4.00    | 5.00   | 5.00    |       |       |
| <b>r_trough</b>           | 1.00    | 0.97    | 0.81  | 0.39   | 1.00    | 0.82   | 0.94    | 0.50  | 0.91    | 0.56   | 0.94    | 0.94    | 0.91    | 0.84   | 0.08    | 0.83   | 0.93    | 1.00    | 0.63   | 0.95    |       |       |
| <b>interior_indicator</b> | FALSE   | FALSE   | TRUE  | TRUE   | FALSE   | TRUE   | FALSE   | TRUE  | FALSE   | TRUE   | FALSE   | FALSE   | FALSE   | TRUE   | FALSE   | TRUE   | FALSE   | FALSE   | TRUE   | FALSE   |       |       |
| <b>trough_indicator</b>   | FALSE   | TRUE    | TRUE  | TRUE   | FALSE   | TRUE   | TRUE    | TRUE  | TRUE    | TRUE   | TRUE    | TRUE    | TRUE    | TRUE   | TRUE    | TRUE   | TRUE    | FALSE   | TRUE   | TRUE    |       |       |
| <b>U_D_depth</b>          | 0.00    | 0.17    | 0.37  | 0.46   | 0.00    | 0.38   | 0.77    | 0.37  | 0.89    | 0.70   | 1.00    | 0.76    | 0.61    | 0.87   | 0.08    | 0.43   | 0.75    | 0.00    | 0.45   | 0.26    |       |       |
| <b>U_I_interiority</b>    | 0.00    | 0.00    | 0.22  | 0.72   | 0.00    | 0.21   | 0.00    | 1.00  | 0.00    | 0.85   | 0.00    | 0.00    | 0.00    | 0.14   | 0.00    | 0.17   | 0.00    | 0.00    | 0.68   | 0.00    |       |       |
| <b>U_M_monotonicity</b>   | 0.00    | 0.86    | 0.78  | 0.78   | 0.00    | 0.81   | 0.91    | 0.68  | 0.84    | 0.78   | 0.84    | 0.82    | 0.95    | 0.84   | 0.79    | 0.85   | 0.95    | 0.00    | 0.80   | 0.94    |       |       |
| <b>U_C_convexity</b>      | 0.00    | 0.66    | 0.66  | 0.80   | 0.00    | 0.66   | 0.68    | 0.66  | 0.63    | 0.70   | 0.66    | 0.65    | 0.64    | 0.71   | 0.74    | 0.66   | 0.63    | 0.38    | 0.89   | 0.67    |       |       |
| <b>U_S_symmetry</b>       | 0.00    | 0.29    | 0.81  | 0.63   | 0.00    | 0.55   | 0.87    | 0.54  | 0.94    | 0.82   | 1.00    | 0.86    | 0.76    | 0.93   | 0.15    | 0.60   | 0.86    | 0.00    | 0.62   | 0.42    |       |       |
| <b>J_R_rise</b>           | 0.00    | 0.00    | 0.00  | 0.54   | 0.00    | 0.00   | 0.00    | 0.63  | 0.00    | 0.00   | 0.00    | 0.24    | 0.39    | 0.13   | 0.92    | 0.00   | 0.00    | 0.00    | 0.55   | 0.00    |       |       |
| <b>J_M_monotonicity</b>   | 0.23    | 0.28    | 0.30  | 0.61   | 0.23    | 0.25   | 0.21    | 0.52  | 0.37    | 0.34   | 0.35    | 0.37    | 0.17    | 0.38   | 0.58    | 0.23   | 0.17    | 0.26    | 0.43   | 0.17    |       |       |
| <b>J_C_rightconvex</b>    | 0.03    | 0.51    | 0.52  | 0.67   | 0.44    | 0.52   | 0.53    | 0.57  | 0.66    | 0.72   | 0.51    | 0.54    | 0.55    | 0.56   | 0.69    | 0.52   | 0.57    | 0.16    | 0.55   | 0.58    |       |       |
| <b>P_turning</b>          | 0.50    | 0.06    | 0.03  | 0.06   | 0.03    | 0.12   | 0.25    | 0.00  | 0.06    | 0.06   | 0.06    | 0.01    | 0.25    | 0.03   | 0.01    | 0.12   | 0.25    | 0.12    | 0.06   | 0.06    |       |       |
| <b>final_structure</b>    | neither | neither | U     | U      | neither | U      | neither | U     | neither | U      | neither | neither | neither | U      | neither | U      | neither | neither | U      | neither |       |       |
| <b>U_supported</b>        | FALSE   | FALSE   | TRUE  | TRUE   | FALSE   | TRUE   | FALSE   | TRUE  | FALSE   | TRUE   | FALSE   | FALSE   | FALSE   | TRUE   | FALSE   | TRUE   | FALSE   | FALSE   | TRUE   | FALSE   |       |       |
| <b>J_supported</b>        | FALSE   | FALSE   | FALSE | FALSE  | FALSE   | FALSE  | FALSE   | FALSE | FALSE   | FALSE  | FALSE   | FALSE   | FALSE   | FALSE  | FALSE   | FALSE  | FALSE   | FALSE   | FALSE  | FALSE   |       |       |

Table S6ez. Country Summary Cantril U-shape ratings, 2006-2024 (Luxembourg—New Zealand)

| KPI                | Luxem  | Madag   | Malaw   | Malay   | Maldi   | Mali   | Malta  | Maurita | Mauriti | Mexic   | Moldo   | Mongo   | Monte   | Moroc  | Mozam   | Myanm | Nagor   | Namib   | Nepal  | Nethe   | NewZ   |       |       |
|--------------------|--------|---------|---------|---------|---------|--------|--------|---------|---------|---------|---------|---------|---------|--------|---------|-------|---------|---------|--------|---------|--------|-------|-------|
| shape_class        | U      | neither | neither | neither | neither | U      | U      | neither | U       | neither | neither | neither | neither | U      | neither | U     | neither | neither | U      | neither | J      |       |       |
| U_beauty           | 0.04   | 0.00    | 0.00    | 0.00    | 0.00    | 0.08   | 0.19   | 0.00    | 0.07    | 0.00    | 0.00    | 0.00    | 0.00    | 0.11   | 0.00    | 0.07  | 0.00    | 0.00    | 0.02   | 0.00    | 0.00   |       |       |
| J_beauty           | 0.00   | 0.01    | 0.00    | 0.00    | 0.00    | 0.02   | 0.00   | 0.00    | 0.00    | 0.00    | 0.00    | 0.00    | 0.00    | 0.00   | 0.00    | 0.00  | 0.00    | 0.00    | 0.00   | 0.00    | 0.01   |       |       |
| Dominance          | 1.00   | -1.00   |         |         |         | 0.59   | 1.00   |         | 1.00    |         |         |         |         | 1.00   |         | 0.96  |         |         | 1.00   |         | -1.00  |       |       |
| best_df            | 5.00   | 5.00    | 5.00    | 5.00    | 5.00    | 4.00   | 5.00   | 5.00    | 5.00    | 4.00    | 4.00    | 5.00    | 5.00    | 3.00   | 5.00    | 5.00  | 5.00    | 3.00    | 5.00   | 3.00    | 5.00   |       |       |
| p_value            | 0.00   | 0.00    | 0.00    | 0.00    | 0.00    | 0.00   | 0.00   | 0.00    | 0.00    | 0.00    | 0.00    | 0.00    | 0.00    | 0.00   | 0.00    | 0.00  | 0.00    | 0.00    | 0.00   | 0.00    | 0.00   |       |       |
| lr_stat            | 44.54  | 34.73   | 49.30   | 36.16   | 24.53   | 47.54  | 61.88  | 23.86   | 58.59   | 34.06   | 91.25   | 59.88   | 51.61   | 31.82  | 52.45   | 26.56 | 31.11   | 31.63   | 44.63  | 34.99   | 44.60  |       |       |
| linear_aic         | -9.73  | 5.05    | 5.84    | -24.63  | 25.79   | 13.99  | 1.40   | 20.81   | 12.72   | -19.61  | 28.23   | -6.23   | -6.25   | 1.47   | 23.74   | 3.23  | 7.56    | 26.25   | 1.61   | -35.30  | -9.33  |       |       |
| spline_aic         | -36.28 | -11.68  | -25.46  | -42.79  | 19.26   | -17.55 | -42.48 | 14.95   | -27.87  | -37.67  | -47.01  | -48.11  | -39.85  | -16.35 | -10.70  | -5.33 | -5.54   | 8.62    | -25.02 | -56.29  | -35.93 |       |       |
| min_age            | 81.10  | 87.49   | 88.99   |         | 87.86   | 78.28  | 56.10  |         | 47.64   | 87.68   | 85.80   |         |         | 88.99  | 45.20   |       | 35.23   | 87.49   |        | 43.69   | 22.64  | 23.20 |       |
| min_value          | 6.67   | 3.88    | 2.25    |         | 3.04    | 3.71   | 6.16   |         | 5.58    | 5.67    | 3.81    |         |         | 4.43   | 4.73    |       | 4.16    | 4.29    |        | 4.60    | 7.36   | 6.93  |       |
| amplitude          | 0.77   | 1.06    | 2.11    | 1.08    | 2.45    | 1.49   | 1.04   | 1.85    | 1.22    | 1.47    | 2.67    | 1.15    |         | 2.07   | 0.94    | 3.29  |         | 1.15    | 1.14   | 2.64    | 0.70   | 0.29  | 0.87  |
| delta_endpoints    | -0.11  | 0.58    | -1.33   | -1.08   | -0.44   | 0.64   | -0.65  | -1.53   | -0.56   | -1.04   | -0.22   | -1.15   |         | -1.79  | -0.66   | -3.26 |         | 0.49    | -0.10  | -2.52   | -0.64  | -0.25 | 0.17  |
| n_minima           | 4.00   | 3.00    | 3.00    | 3.00    | 5.00    | 2.00   | 2.00   | 3.00    | 2.00    | 2.00    | 1.00    | 2.00    | 2.00    | 2.00   | 2.00    | 4.00  | 4.00    | 3.00    | 2.00   | 3.00    | 2.00   | 3.00  | 2.00  |
| n_maxima           | 4.00   | 2.00    | 2.00    | 3.00    | 4.00    | 1.00   | 2.00   | 4.00    | 2.00    | 1.00    | 1.00    | 2.00    | 1.00    | 2.00   | 5.00    | 3.00  | 3.00    | 4.00    | 2.00   | 3.00    | 3.00   | 2.00  | 2.00  |
| turning_points     | 8.00   | 5.00    | 5.00    | 6.00    | 9.00    | 3.00   | 4.00   | 7.00    | 4.00    | 3.00    | 2.00    | 4.00    | 3.00    | 4.00   | 9.00    | 7.00  | 7.00    | 7.00    | 4.00   | 6.00    | 4.00   | 4.00  | 4.00  |
| r_trough           | 0.85   | 0.94    | 0.96    | 1.00    | 0.94    | 0.82   | 0.52   | 1.00    | 0.41    | 0.94    | 0.92    | 1.00    | 0.96    | 0.38   | 1.00    | 0.24  | 0.94    | 1.00    | 0.36   | 0.08    | 0.08   | 0.08  | 0.08  |
| interior_indicator | TRUE   | FALSE   | FALSE   | FALSE   | FALSE   | TRUE   | TRUE   | FALSE   | TRUE    | FALSE   | FALSE   | FALSE   | FALSE   | TRUE   | FALSE   | TRUE  | FALSE   | FALSE   | FALSE  | TRUE    | FALSE  | FALSE | FALSE |
| trough_indicator   | TRUE   | TRUE    | TRUE    | FALSE   | TRUE    | TRUE   | TRUE   | FALSE   | TRUE    | TRUE    | TRUE    | FALSE   | TRUE    | TRUE   | FALSE   | TRUE  | TRUE    | FALSE   | TRUE   | FALSE   | TRUE   | TRUE  | TRUE  |
| U_D_depth          | 0.86   | 0.45    | 0.37    | 0.00    | 0.79    | 0.57   | 0.37   | 0.00    | 0.19    | 0.30    | 0.92    | 0.00    | 0.14    | 0.30   | 0.00    | 0.44  | 0.91    | 0.00    | 0.10   | 0.14    | 0.55   | 0.55  |       |
| U_I_interiority    | 0.11   | 0.00    | 0.00    | 0.00    | 0.00    | 0.21   | 0.95   | 0.00    | 0.77    | 0.00    | 0.00    | 0.00    | 0.00    | 0.69   | 0.00    | 0.36  | 0.00    | 0.00    | 0.64   | 0.00    | 0.00   | 0.00  |       |
| U_M_monotonicity   | 0.69   | 0.78    | 0.86    | 0.00    | 0.78    | 0.89   | 0.83   | 0.00    | 0.79    | 0.95    | 1.00    | 0.00    | 0.94    | 0.84   | 0.00    | 0.77  | 0.87    | 0.00    | 0.83   | 0.70    | 0.88   | 0.88  |       |
| U_C_convexity      | 0.68   | 0.64    | 0.70    | 0.08    | 0.68    | 0.87   | 1.00   | 0.00    | 1.00    | 0.71    | 0.71    | 0.00    | 0.66    | 1.00   | 0.00    | 0.67  | 0.64    | 0.00    | 1.00   | 0.80    | 0.67   | 0.67  |       |
| U_S_symmetry       | 0.93   | 0.62    | 0.54    | 0.00    | 0.90    | 0.73   | 0.54   | 0.00    | 0.44    | 0.46    | 0.96    | 0.00    | 0.24    | 0.46   | 0.00    | 0.68  | 0.95    | 0.00    | 0.18   | 0.24    | 0.85   | 0.85  |       |
| J_R_rise           | 0.00   | 0.55    | 0.00    | 0.00    | 0.00    | 0.43   | 0.00   | 0.00    | 0.00    | 0.00    | 0.00    | 0.00    | 0.00    | 0.00   | 0.00    | 0.42  | 0.00    | 0.00    | 0.00   | 0.00    | 0.19   | 0.19  |       |
| J_M_monotonicity   | 0.52   | 0.43    | 0.30    | 0.26    | 0.43    | 0.36   | 0.33   | 0.43    | 0.37    | 0.15    | 0.09    | 0.24    | 0.15    | 0.44   | 0.36    | 0.46  | 0.30    | 0.41    | 0.44   | 0.46    | 0.72   | 0.72  |       |
| J_C_rightconvex    | 0.54   | 0.58    | 0.49    | 0.44    | 0.50    | 0.66   | 0.49   | 0.41    | 0.27    | 0.51    | 0.52    | 0.41    | 0.54    | 0.59   | 0.42    | 0.55  | 0.60    | 0.50    | 0.42   | 0.51    | 0.33   | 0.33  |       |
| P_turning          | 0.01   | 0.06    | 0.06    | 0.03    | 0.00    | 0.25   | 0.12   | 0.01    | 0.12    | 0.25    | 0.50    | 0.12    | 0.25    | 0.12   | 0.00    | 0.01  | 0.01    | 0.01    | 0.12   | 0.03    | 0.12   | 0.12  |       |
| final_structure    | U      | neither | neither | neither | neither | U      | U      | neither | U       | neither | neither | neither | neither | U      | neither | U     | neither | neither | U      | neither | J      | J     |       |
| U_supported        | TRUE   | FALSE   | FALSE   | FALSE   | FALSE   | TRUE   | TRUE   | FALSE   | TRUE    | FALSE   | FALSE   | FALSE   | FALSE   | TRUE   | FALSE   | TRUE  | FALSE   | FALSE   | TRUE   | FALSE   | FALSE  | FALSE |       |
| J_supported        | FALSE  | FALSE   | FALSE   | FALSE   | FALSE   | FALSE  | FALSE  | FALSE   | FALSE   | FALSE   | FALSE   | FALSE   | FALSE   | FALSE  | FALSE   | FALSE | FALSE   | FALSE   | FALSE  | FALSE   | FALSE  | TRUE  |       |

Table S6ez. Country Summary Cantril U-shape ratings, 2006-2024 (Nicaragua—Saudi Arabia)

| KPI         | Nicar   | Niger   | Nigeri | N.Mac   | N.Cyp | Norwa   | Oman | Pakis   | Pales   | Panam   | Parag   | Peru | Phili | Polan   | Portu | P.Rico | Qatar | Roman | Russi   | Rwand   | S.Arab |
|-------------|---------|---------|--------|---------|-------|---------|------|---------|---------|---------|---------|------|-------|---------|-------|--------|-------|-------|---------|---------|--------|
| shape_class | neither | neither | U      | neither | U     | neither |      | neither | neither | neither | neither | U    | U     | neither | U     | U      |       | U     | neither | neither |        |
| U_beauty    | 0.00    | 0.00    | 0.02   | 0.00    | 0.21  | 0.00    |      | 0.00    | 0.00    | 0.00    | 0.00    | 0.03 | 0.10  | 0.00    | 0.04  | 0.05   |       | 0.00  | 0.00    | 0.00    |        |
| J_beauty    | 0.00    | 0.00    | 0.00   | 0.00    | 0.06  | 0.00    |      | 0.00    | 0.00    | 0.00    | 0.00    | 0.00 | 0.00  | 0.00    | 0.00  | 0.00   |       | 0.00  | 0.00    | 0.00    |        |
| Dominance   |         |         | 0.92   |         | 0.57  |         |      |         |         |         |         | 1.00 | 1.00  |         | 1.00  | 0.99   |       | 1.00  |         |         |        |
| best_df     | 5.00    | 3.00    | 5.00   | 5.00    | 3.00  | 3.00    |      | 5.00    | 5.00    | 5.00    | 5.00    | 3.00 | 5.00  | 4.00    | 4.00  | 5.00   |       | 4.00  | 3.00    | 5.00    |        |
| p_value     | 0.00    | 0.00    | 0.00   | 0.00    | 0.00  | 0.00    |      | 0.00    | 0.00    | 0.00    | 0.00    | 0.00 | 0.00  | 0.00    | 0.00  | 0.01   |       | 0.00  | 0.00    | 0.00    |        |

|                           |         |         |        |         |        |         |         |         |         |         |        |        |         |        |       |        |         |         |
|---------------------------|---------|---------|--------|---------|--------|---------|---------|---------|---------|---------|--------|--------|---------|--------|-------|--------|---------|---------|
| <b>lr_stat</b>            | 62.10   | 54.29   | 61.35  | 78.61   | 72.68  | 70.29   | 26.08   | 24.25   | 57.55   | 98.41   | 40.61  | 56.22  | 43.75   | 69.20  | 22.36 | 79.98  | 54.32   | 76.94   |
| <b>linear_aic</b>         | 22.45   | -1.60   | 20.83  | 17.97   | 31.52  | -2.61   | -2.12   | -1.91   | 2.90    | 7.60    | -6.58  | 1.37   | -33.51  | 6.53   | 14.05 | 17.64  | -18.77  | 2.93    |
| <b>spline_aic</b>         | -21.66  | -41.89  | -22.52 | -42.64  | -27.16 | -58.89  | -10.19  | -8.15   | -36.65  | -72.81  | -33.19 | -36.85 | -61.25  | -46.67 | 9.68  | -46.34 | -59.09  | -56.01  |
| <b>min_age</b>            | 88.24   |         | 78.65  | 86.17   | 50.83  |         |         | 89.56   | 87.86   |         | 74.33  | 38.99  |         | 79.59  | 81.85 | 84.11  |         |         |
| <b>min_value</b>          | 4.29    |         | 4.62   | 4.43    | 5.28   |         |         | 3.17    | 5.71    |         | 5.19   | 5.02   |         | 4.91   | 6.40  | 5.03   |         |         |
| <b>amplitude</b>          | 2.36    | 0.98    | 1.88   | 1.81    | 2.72   | 0.84    | 1.68    | 2.11    | 1.54    | 2.26    | 1.18   | 0.95   | 1.61    | 2.00   | 1.23  | 2.18   | 2.26    | 2.39    |
| <b>delta_endpoints</b>    | -0.74   | -0.78   | 1.44   | -0.59   | 1.81   | -0.71   | -1.67   | -1.78   | -0.49   | -2.26   | -1.00  | -0.55  | -1.61   | -1.30  | 0.02  | -1.27  | -2.26   | -2.39   |
| <b>n_minima</b>           | 3.00    | 2.00    | 4.00   | 2.00    | 2.00   | 3.00    | 3.00    | 3.00    | 3.00    | 2.00    | 1.00   | 3.00   | 2.00    | 1.00   | 3.00  | 2.00   | 1.00    | 1.00    |
| <b>n_maxima</b>           | 2.00    | 2.00    | 5.00   | 1.00    | 1.00   | 3.00    | 4.00    | 2.00    | 2.00    | 2.00    | 0.00   | 2.00   | 2.00    | 0.00   | 2.00  | 1.00   | 1.00    | 1.00    |
| <b>turning_points</b>     | 5.00    | 4.00    | 9.00   | 3.00    | 3.00   | 6.00    | 7.00    | 5.00    | 5.00    | 4.00    | 1.00   | 5.00   | 4.00    | 1.00   | 5.00  | 3.00   | 2.00    | 2.00    |
| <b>r_trough</b>           | 0.95    | 1.00    | 0.82   | 0.92    | 0.45   | 1.00    | 1.00    | 0.97    | 0.94    | 1.00    | 0.76   | 0.29   | 1.00    | 0.83   | 0.86  | 0.89   | 1.00    | 1.00    |
| <b>interior_indicator</b> | FALSE   | FALSE   | TRUE   | FALSE   | TRUE   | FALSE   | FALSE   | FALSE   | FALSE   | FALSE   | TRUE   | TRUE   | FALSE   | TRUE   | TRUE  | TRUE   | FALSE   | FALSE   |
| <b>trough_indicator</b>   | TRUE    | FALSE   | TRUE   | TRUE    | TRUE   | FALSE   | FALSE   | TRUE    | TRUE    | FALSE   | TRUE   | TRUE   | FALSE   | TRUE   | TRUE  | TRUE   | FALSE   | FALSE   |
| <b>U_D_depth</b>          | 0.69    | 0.00    | 0.23   | 0.67    | 0.34   | 0.00    | 0.00    | 0.15    | 0.68    | 0.00    | 0.15   | 0.42   | 0.00    | 0.35   | 0.99  | 0.42   | 0.00    | 0.00    |
| <b>U_I_interiority</b>    | 0.00    | 0.00    | 0.19   | 0.00    | 0.88   | 0.00    | 0.00    | 0.00    | 0.00    | 0.00    | 0.34   | 0.48   | 0.00    | 0.16   | 0.09  | 0.01   | 0.00    | 0.00    |
| <b>U_M_monotonicity</b>   | 0.87    | 0.00    | 0.80   | 0.94    | 0.99   | 0.00    | 0.00    | 0.90    | 0.92    | 0.00    | 1.00   | 0.81   | 0.00    | 1.00   | 0.80  | 0.96   | 0.00    | 0.00    |
| <b>U_C_convexity</b>      | 0.65    | 0.00    | 0.75   | 0.63    | 1.00   | 0.00    | 0.00    | 0.68    | 0.66    | 0.00    | 1.00   | 0.81   | 0.68    | 0.82   | 0.70  | 0.78   | 0.00    | 0.00    |
| <b>U_S_symmetry</b>       | 0.81    | 0.00    | 0.38   | 0.80    | 0.50   | 0.00    | 0.00    | 0.27    | 0.81    | 0.00    | 0.26   | 0.59   | 0.00    | 0.52   | 0.99  | 0.59   | 0.00    | 0.00    |
| <b>J_R_rise</b>           | 0.00    | 0.00    | 0.77   | 0.00    | 0.66   | 0.00    | 0.00    | 0.00    | 0.00    | 0.00    | 0.00   | 0.00   | 0.00    | 0.00   | 0.01  | 0.00   | 0.00    | 0.00    |
| <b>J_M_monotonicity</b>   | 0.28    | 0.56    | 0.46   | 0.19    | 0.54   | 0.47    | 0.31    | 0.23    | 0.20    | 0.22    | 0.24   | 0.47   | 0.17    | 0.17   | 0.44  | 0.17   | 0.03    | 0.04    |
| <b>J_C_rightconvex</b>    | 0.55    | 0.40    | 0.59   | 0.53    | 0.65   | 0.44    | 0.41    | 0.51    | 0.55    | 0.44    | 1.00   | 0.46   | 0.41    | 0.65   | 0.55  | 0.65   | 0.38    | 0.44    |
| <b>P_turning</b>          | 0.06    | 0.12    | 0.00   | 0.25    | 0.25   | 0.03    | 0.01    | 0.06    | 0.06    | 0.12    | 1.00   | 0.06   | 0.12    | 1.00   | 0.06  | 0.25   | 0.50    | 0.50    |
| <b>final_structure</b>    | neither | neither | U      | neither | U      | neither | neither | neither | neither | neither | U      | U      | neither | U      | U     | U      | neither | neither |
| <b>U_supported</b>        | FALSE   | FALSE   | TRUE   | FALSE   | TRUE   | FALSE   | FALSE   | FALSE   | FALSE   | FALSE   | TRUE   | TRUE   | FALSE   | TRUE   | TRUE  | TRUE   | FALSE   | FALSE   |
| <b>J_supported</b>        | FALSE   | FALSE   | FALSE  | FALSE   | FALSE  | FALSE   | FALSE   | FALSE   | FALSE   | FALSE   | FALSE  | FALSE  | FALSE   | FALSE  | FALSE | FALSE  | FALSE   | FALSE   |

Table S6ez. Country Summary Cantril U-shape ratings, 2006-2024 (Senegal—Tanzania)

| KPI                    | Seneg   | Serbi  | S.Leon | Singa  | Slova   | Slove  | Somalia | Somalil | S.Afri  | S.Kore | S.Suda | Spain  | S.Lank  | Sudan   | Surin | Swede   | Switz   | Syria   | Taiwa  | Tajik   | Tanza   |
|------------------------|---------|--------|--------|--------|---------|--------|---------|---------|---------|--------|--------|--------|---------|---------|-------|---------|---------|---------|--------|---------|---------|
| <b>shape_class</b>     | neither | U      | U      | U      | neither | U      | neither | neither | neither | U      | U      | U      | neither | neither |       | neither | neither | neither | U      | neither | neither |
| <b>U_beauty</b>        | 0.00    | 0.00   | 0.04   | 0.01   | 0.00    | 0.38   | 0.00    | 0.00    | 0.00    | 0.07   | 0.27   | 0.00   | 0.00    | 0.00    |       | 0.00    | 0.00    | 0.00    | 0.04   | 0.00    | 0.00    |
| <b>J_beauty</b>        | 0.00    | 0.00   | 0.00   | 0.00   | 0.00    | 0.00   | 0.00    | 0.00    | 0.00    | 0.00   | 0.00   | 0.00   | 0.00    | 0.00    |       | 0.00    | 0.00    | 0.00    | 0.00   | 0.00    | 0.00    |
| <b>Dominance</b>       |         | 1.00   | 1.00   | 1.00   |         | 1.00   |         |         |         | 1.00   | 1.00   | 1.00   |         |         |       |         |         |         | 1.00   |         |         |
| <b>best_df</b>         | 5.00    | 5.00   | 5.00   | 5.00   | 5.00    | 5.00   | 5.00    | 4.00    | 5.00    | 5.00   | 4.00   | 4.00   | 4.00    | 3.00    |       | 5.00    | 4.00    | 4.00    | 5.00   | 3.00    | 4.00    |
| <b>p_value</b>         | 0.00    | 0.00   | 0.27   | 0.00   | 0.00    | 0.00   | 0.00    | 0.00    | 0.00    | 0.00   | 0.00   | 0.00   | 0.00    | 0.00    |       | 0.00    | 0.00    | 0.00    | 0.00   | 0.00    | 0.00    |
| <b>lr_stat</b>         | 55.69   | 67.93  | 11.10  | 50.48  | 45.80   | 74.62  | 54.14   | 28.14   | 35.05   | 62.88  | 34.29  | 33.27  | 36.71   | 47.16   |       | 76.01   | 68.74   | 52.64   | 73.81  | 30.47   | 47.22   |
| <b>linear_aic</b>      | 2.13    | 2.53   | 0.86   | 4.32   | -9.04   | 14.25  | 38.01   | 1.54    | -9.40   | -3.06  | 31.64  | -22.31 | -9.65   | 11.65   |       | 2.16    | 9.45    | 15.31   | -2.21  | -30.59  | -4.46   |
| <b>spline_aic</b>      | -35.55  | -47.40 | 7.75   | -28.16 | -36.83  | -42.36 | 1.87    | -10.59  | -26.45  | -47.94 | 13.35  | -39.57 | -30.35  | -21.51  |       | -55.86  | -43.29  | -21.33  | -58.02 | -47.07  | -35.67  |
| <b>min_age</b>         | 88.62   | 81.29  | 81.47  | 76.96  | 85.80   | 61.36  | 88.80   | 88.99   | 89.74   | 78.09  | 63.43  | 81.47  |         |         |       | 88.62   |         | 88.24   | 78.65  | 87.30   |         |
| <b>min_value</b>       | 3.42    | 4.75   | 3.32   | 6.44   | 5.11    | 5.99   | 0.56    | 3.22    | 4.28    | 5.26   | 2.53   | 6.33   |         |         |       | 6.75    |         | 2.23    | 6.31   | 4.45    |         |
| <b>amplitude</b>       | 1.38    | 2.00   | 0.82   | 1.19   | 1.70    | 1.41   | 4.91    | 1.91    | 1.05    | 1.23   | 2.09   | 0.84   | 0.62    | 1.67    |       | 0.88    | 1.38    | 1.97    | 0.85   | 0.93    | 1.84    |
| <b>delta_endpoints</b> | -0.36   | -1.90  | -0.11  | -0.02  | -1.28   | -0.55  | -2.24   | -1.35   | -0.91   | -0.53  | 0.13   | -0.78  | -0.62   | -1.66   |       | -0.58   | -1.06   | -1.25   | -0.48  | -0.70   | -1.84   |
| <b>n_minima</b>        | 3.00    | 2.00   | 2.00   | 4.00   | 2.00    | 1.00   | 3.00    | 3.00    | 5.00    | 2.00   | 3.00   | 3.00   | 2.00    | 2.00    |       | 3.00    | 2.00    | 2.00    | 4.00   | 2.00    | 2.00    |
| <b>n_maxima</b>        | 2.00    | 2.00   | 3.00   | 4.00   | 1.00    | 0.00   | 3.00    | 3.00    | 4.00    | 2.00   | 3.00   | 3.00   | 2.00    | 2.00    |       | 2.00    | 3.00    | 1.00    | 4.00   | 2.00    | 2.00    |
| <b>turning_points</b>  | 5.00    | 4.00   | 5.00   | 8.00   | 3.00    | 1.00   | 6.00    | 6.00    | 9.00    | 4.00   | 6.00   | 6.00   | 4.00    | 4.00    |       | 5.00    | 5.00    | 3.00    | 8.00   | 4.00    | 4.00    |

|                           |         |       |       |       |         |       |         |         |         |       |       |       |         |         |         |         |         |       |         |         |
|---------------------------|---------|-------|-------|-------|---------|-------|---------|---------|---------|-------|-------|-------|---------|---------|---------|---------|---------|-------|---------|---------|
| <b>r_trough</b>           | 0.95    | 0.86  | 0.86  | 0.80  | 0.92    | 0.59  | 0.96    | 0.96    | 0.97    | 0.81  | 0.62  | 0.86  | 1.00    | 1.00    | 0.95    | 1.00    | 0.95    | 0.82  | 0.94    | 1.00    |
| <b>interior_indicator</b> | FALSE   | TRUE  | TRUE  | TRUE  | FALSE   | TRUE  | FALSE   | FALSE   | FALSE   | TRUE  | TRUE  | TRUE  | FALSE   | FALSE   | FALSE   | FALSE   | FALSE   | TRUE  | FALSE   | FALSE   |
| <b>trough_indicator</b>   | TRUE    | TRUE  | TRUE  | TRUE  | TRUE    | TRUE  | TRUE    | TRUE    | TRUE    | TRUE  | TRUE  | TRUE  | FALSE   | FALSE   | TRUE    | FALSE   | TRUE    | TRUE  | TRUE    | FALSE   |
| <b>U_D_depth</b>          | 0.67    | 0.05  | 0.72  | 0.14  | 0.25    | 0.61  | 0.50    | 0.15    | 0.13    | 0.50  | 0.63  | 0.07  | 0.00    | 0.00    | 0.17    | 0.00    | 0.37    | 0.43  | 0.20    | 0.00    |
| <b>U_I_interiority</b>    | 0.00    | 0.11  | 0.10  | 0.25  | 0.00    | 0.77  | 0.00    | 0.00    | 0.00    | 0.21  | 0.70  | 0.10  | 0.00    | 0.00    | 0.00    | 0.00    | 0.00    | 0.19  | 0.00    | 0.00    |
| <b>U_M_monotonicity</b>   | 0.85    | 0.79  | 0.77  | 0.65  | 0.99    | 1.00  | 0.83    | 0.85    | 0.81    | 0.91  | 0.77  | 0.80  | 0.00    | 0.00    | 0.67    | 0.00    | 0.84    | 0.76  | 0.89    | 0.00    |
| <b>U_C_convexity</b>      | 0.69    | 0.61  | 0.62  | 0.66  | 0.71    | 0.87  | 0.68    | 0.77    | 0.71    | 0.86  | 0.82  | 0.72  | 0.73    | 0.00    | 0.83    | 0.00    | 0.77    | 0.68  | 0.85    | 0.00    |
| <b>U_S_symmetry</b>       | 0.84    | 0.09  | 0.92  | 0.93  | 0.40    | 0.76  | 0.69    | 0.70    | 0.40    | 0.76  | 0.13  | 0.00  | 0.00    | 0.00    | 0.34    | 0.00    | 0.54    | 0.60  | 0.34    | 0.00    |
| <b>J_R_rise</b>           | 0.00    | 0.00  | 0.00  | 0.00  | 0.00    | 0.00  | 0.00    | 0.00    | 0.00    | 0.00  | 0.06  | 0.00  | 0.00    | 0.00    | 0.00    | 0.00    | 0.00    | 0.00  | 0.00    | 0.00    |
| <b>J_M_monotonicity</b>   | 0.31    | 0.20  | 0.30  | 0.49  | 0.11    | 0.41  | 0.34    | 0.31    | 0.37    | 0.32  | 0.53  | 0.31  | 0.36    | 0.39    | 0.57    | 0.44    | 0.33    | 0.40  | 0.26    | 0.08    |
| <b>J_C_rightconvex</b>    | 0.48    | 0.48  | 0.49  | 0.52  | 0.79    | 0.66  | 0.49    | 0.50    | 0.51    | 0.89  | 0.54  | 0.57  | 0.36    | 0.33    | 0.48    | 0.02    | 0.46    | 0.54  | 0.55    | 0.45    |
| <b>P_turning</b>          | 0.06    | 0.12  | 0.06  | 0.01  | 0.25    | 1.00  | 0.03    | 0.03    | 0.00    | 0.12  | 0.03  | 0.03  | 0.12    | 0.12    | 0.06    | 0.06    | 0.25    | 0.01  | 0.12    | 0.12    |
| <b>final_structure</b>    | neither | U     | U     | U     | neither | U     | neither | neither | neither | U     | U     | U     | neither | neither | neither | neither | neither | U     | neither | neither |
| <b>U_supported</b>        | FALSE   | TRUE  | TRUE  | TRUE  | FALSE   | TRUE  | FALSE   | FALSE   | FALSE   | TRUE  | TRUE  | TRUE  | FALSE   | FALSE   | FALSE   | FALSE   | FALSE   | TRUE  | FALSE   | FALSE   |
| <b>J_supported</b>        | FALSE   | FALSE | FALSE | FALSE | FALSE   | FALSE | FALSE   | FALSE   | FALSE   | FALSE | FALSE | FALSE | FALSE   | FALSE   | FALSE   | FALSE   | FALSE   | FALSE | FALSE   | FALSE   |

Table S6ez. Country Summary Cantril U-shape ratings, 2006-2024

| KPI                       | Thail  | Togo    | Tr&To   | Tunis   | Turke   | Turkm   | Ugand   | Ukrai   | UAE | UK     | USA    | Urugu  | Uzbek  | Venez  | Vietn   | Yemen   | Zambi   | Zimba  |
|---------------------------|--------|---------|---------|---------|---------|---------|---------|---------|-----|--------|--------|--------|--------|--------|---------|---------|---------|--------|
| <b>shape_class</b>        | U      | neither |     | U      | U      | U      | U      | U      | neither | neither | neither | U      |
| <b>U_beauty</b>           | 0.68   | 0.00    | 0.00    | 0.00    | 0.00    | 0.00    | 0.00    | 0.00    |     | 0.01   | 0.03   | 0.07   | 0.02   | 0.32   | 0.00    | 0.00    | 0.00    | 0.01   |
| <b>J_beauty</b>           | 0.00   | 0.00    | 0.00    | 0.00    | 0.00    | 0.00    | 0.00    | 0.00    |     | 0.02   | 0.00   | 0.00   | 0.02   | 0.00   | 0.00    | 0.00    | 0.00    | 0.00   |
| <b>Dominance</b>          | 1.00   |         | -1.00   |         | -1.00   | -1.00   | -1.00   |         |     | -0.12  | 1.00   | 1.00   | -0.03  | 1.00   |         |         |         | 1.00   |
| <b>best_df</b>            | 5.00   | 5.00    |         | 5.00    | 5.00    | 5.00    | 5.00    | 5.00    |     | 4.00   | 5.00   | 5.00   | 5.00   | 5.00   | 3.00    | 3.00    | 3.00    | 4.00   |
| <b>p_value</b>            | 0.00   | 0.00    | 0.01    | 0.00    | 0.00    | 0.00    | 0.00    | 0.00    |     | 0.00   | 0.00   | 0.00   | 0.00   | 0.00   | 0.00    | 0.00    | 0.02    | 0.00   |
| <b>lr_stat</b>            | 53.87  | 29.43   | 21.03   | 60.71   | 107.61  | 43.07   | 56.28   | 45.75   |     | 58.35  | 68.61  | 70.10  | 53.26  | 73.23  | 47.29   | 22.83   | 16.30   | 41.06  |
| <b>linear_aic</b>         | 16.61  | 4.62    | 21.83   | 12.45   | 42.55   | 21.54   | 9.67    | -19.31  |     | -10.65 | -2.94  | 4.67   | 23.57  | 0.28   | -8.59   | -7.75   | -15.51  | -12.35 |
| <b>spline_aic</b>         | -19.27 | -6.82   | 18.80   | -30.26  | -47.05  | -3.53   | -28.61  | -47.06  |     | -52.99 | -53.56 | -47.42 | -11.70 | -54.95 | -41.88  | -16.57  | -17.81  | -37.41 |
| <b>min_age</b>            | 60.23  |         | 88.24   |         | 85.42   | 20.57   | 86.92   |         |     | 27.71  | 27.15  | 61.55  | 38.05  | 54.22  |         |         | 86.74   | 78.84  |
| <b>min_value</b>          | 5.80   |         | 5.21    |         | 4.80    | 5.33    | 3.56    |         |     | 6.76   | 6.85   | 6.02   | 5.67   | 5.62   |         |         | 3.61    | 3.30   |
| <b>amplitude</b>          | 1.16   | 1.39    | 1.77    | 2.28    | 3.70    | 2.16    | 1.20    | 2.72    |     | 0.92   | 0.82   | 1.06   | 2.66   | 0.88   | 1.38    | 1.96    | 1.21    | 0.93   |
| <b>delta_endpoints</b>    | -0.01  | -1.39   | 0.41    | -2.28   | 2.82    | 1.91    | 0.06    | -2.72   |     | 0.67   | 0.01   | -0.85  | 2.35   | -0.26  | -1.38   | -1.96   | -0.84   | -0.78  |
| <b>n_minima</b>           | 1.00   | 3.00    | 5.00    | 3.00    | 4.00    | 4.00    | 3.00    | 1.00    |     | 3.00   | 2.00   | 2.00   | 3.00   | 5.00   | 1.00    | 1.00    | 3.00    | 2.00   |
| <b>n_maxima</b>           | 1.00   | 3.00    | 4.00    | 3.00    | 3.00    | 3.00    | 2.00    | 1.00    |     | 2.00   | 2.00   | 2.00   | 2.00   | 4.00   | 1.00    | 1.00    | 2.00    | 2.00   |
| <b>turning_points</b>     | 2.00   | 6.00    | 9.00    | 6.00    | 7.00    | 7.00    | 5.00    | 2.00    |     | 5.00   | 4.00   | 4.00   | 5.00   | 9.00   | 2.00    | 2.00    | 5.00    | 4.00   |
| <b>r_trough</b>           | 0.58   | 1.00    | 0.95    | 1.00    | 0.91    | 0.05    | 0.93    | 1.00    |     | 0.14   | 0.14   | 0.59   | 0.28   | 0.50   | 1.00    | 1.00    | 0.93    | 0.82   |
| <b>interior_indicator</b> | TRUE   | FALSE   |     | TRUE   | TRUE   | TRUE   | TRUE   | TRUE   | FALSE   | FALSE   | FALSE   | TRUE   |
| <b>trough_indicator</b>   | TRUE   | FALSE   | TRUE    | FALSE   | TRUE    | TRUE    | TRUE    | FALSE   |     | TRUE   | TRUE   | TRUE   | TRUE   | TRUE   | FALSE   | FALSE   | TRUE    | TRUE   |
| <b>U_D_depth</b>          | 0.92   | 0.00    | 0.77    | 0.00    | 0.24    | 0.11    | 0.95    | 0.00    |     | 0.28   | 0.49   | 0.20   | 0.12   | 0.71   | 0.00    | 0.00    | 0.30    | 0.16   |
| <b>U_I_interiority</b>    | 0.81   | 0.00    | 0.00    | 0.00    | 0.00    | 0.00    | 0.00    | 0.00    |     | 0.11   | 0.09   | 0.77   | 0.45   | 0.99   | 0.00    | 0.00    | 0.00    | 0.19   |
| <b>U_M_monotonicity</b>   | 0.97   | 0.00    | 0.74    | 0.00    | 0.86    | 0.74    | 0.85    | 0.00    |     | 0.80   | 0.81   | 0.88   | 0.88   | 0.71   | 0.00    | 0.00    | 0.93    | 0.74   |
| <b>U_C_convexity</b>      | 0.94   | 0.63    | 0.65    | 0.00    | 0.61    | 0.71    | 0.61    | 0.55    |     | 0.87   | 0.81   | 0.82   | 0.90   | 0.70   | 0.00    | 0.00    | 0.85    | 0.72   |
| <b>U_S_symmetry</b>       | 1.00   | 0.00    | 0.87    | 0.00    | 0.38    | 0.20    | 0.97    | 0.00    |     | 0.43   | 0.99   | 0.33   | 0.21   | 0.83   | 0.00    | 0.00    | 0.46    | 0.27   |
| <b>J_R_rise</b>           | 0.00   | 0.00    | 0.23    | 0.00    | 0.76    | 0.89    | 0.05    | 0.00    |     | 0.72   | 0.01   | 0.00   | 0.88   | 0.00   | 0.00    | 0.00    | 0.00    | 0.00   |
| <b>J_M_monotonicity</b>   | 0.40   | 0.34    | 0.49    | 0.29    | 0.33    | 0.52    | 0.32    | 0.10    |     | 0.55   | 0.57   | 0.37   | 0.56   | 0.44   | 0.13    | 0.12    | 0.19    | 0.32   |

|                        |       |         |         |         |         |         |         |         |       |       |       |       |       |         |         |         |       |
|------------------------|-------|---------|---------|---------|---------|---------|---------|---------|-------|-------|-------|-------|-------|---------|---------|---------|-------|
| <b>J_C_rightconvex</b> | 0.50  | 0.45    | 0.55    | 0.43    | 0.63    | 0.61    | 0.62    | 0.43    | 0.77  | 0.00  | 0.51  | 0.65  | 0.56  | 0.41    | 0.43    | 0.58    | 0.57  |
| <b>P_turning</b>       | 0.50  | 0.03    | 0.00    | 0.03    | 0.01    | 0.01    | 0.06    | 0.50    | 0.06  | 0.12  | 0.12  | 0.06  | 0.00  | 0.50    | 0.50    | 0.06    | 0.12  |
| <b>final_structure</b> | U     | neither | U     | U     | U     | U     | U     | neither | neither | neither | U     |
| <b>U_supported</b>     | TRUE  | FALSE   | TRUE  | TRUE  | TRUE  | TRUE  | TRUE  | FALSE   | FALSE   | FALSE   | TRUE  |
| <b>J_supported</b>     | FALSE | FALSE   | FALSE   | FALSE   | FALSE   | FALSE   | FALSE   | FALSE   | FALSE | FALSE | FALSE | FALSE | FALSE | FALSE   | FALSE   | FALSE   | FALSE |

Table S6fa. Country Overview

| Country                         | Mean U-beauty | Mean J-beauty | Mean dominance | Share U-dominant yrs | Share J-dominant yrs |
|---------------------------------|---------------|---------------|----------------|----------------------|----------------------|
| <b>Afghanistan</b>              | 0.02          | 0.00          | 0.96           | 100.00%              | 0.00%                |
| <b>Albania</b>                  | 0.03          | 0.00          | 0.32           | 66.67%               | 33.33%               |
| <b>Algeria</b>                  | 0.00          | 0.02          | -0.81          | 0.00%                | 100.00%              |
| <b>Angola</b>                   | –             | –             | –              | –                    | –                    |
| <b>Argentina</b>                | 0.02          | 0.00          | 0.29           | 66.67%               | 33.33%               |
| <b>Armenia</b>                  | 0.02          | 0.00          | 1.00           | 100.00%              | 0.00%                |
| <b>Australia</b>                | 0.06          | 0.01          | 0.15           | 61.54%               | 38.46%               |
| <b>Austria</b>                  | 0.03          | 0.00          | 0.87           | 100.00%              | 0.00%                |
| <b>Azerbaijan</b>               | 0.00          | 0.00          | 1.00           | 100.00%              | 0.00%                |
| <b>Bahrain</b>                  | –             | –             | –              | –                    | –                    |
| <b>Bangladesh</b>               | 0.03          | 0.00          | -0.09          | 50.00%               | 50.00%               |
| <b>Belarus</b>                  | 0.01          | 0.00          | 1.00           | 100.00%              | 0.00%                |
| <b>Belgium</b>                  | 0.02          | 0.00          | 0.65           | 83.33%               | 16.67%               |
| <b>Belize</b>                   | 0.00          | 0.00          | –              | –                    | –                    |
| <b>Benin</b>                    | 0.00          | 0.00          | 0.04           | 100.00%              | 0.00%                |
| <b>Bhutan</b>                   | 0.00          | 0.00          | –              | –                    | –                    |
| <b>Bolivia</b>                  | 0.01          | 0.00          | 1.00           | 100.00%              | 0.00%                |
| <b>Bosnia Herzegovina</b>       | 0.03          | 0.00          | 0.68           | 75.00%               | 25.00%               |
| <b>Botswana</b>                 | 0.02          | 0.00          | 0.96           | 100.00%              | 0.00%                |
| <b>Brazil</b>                   | 0.07          | 0.01          | 0.65           | 90.00%               | 10.00%               |
| <b>Bulgaria</b>                 | 0.02          | 0.00          | 0.78           | 80.00%               | 20.00%               |
| <b>Burkina Faso</b>             | 0.01          | 0.00          | 0.00           | 50.00%               | 50.00%               |
| <b>Burundi</b>                  | 0.01          | 0.00          | 1.00           | 100.00%              | 0.00%                |
| <b>Cambodia</b>                 | 0.11          | 0.00          | 0.99           | 100.00%              | 0.00%                |
| <b>Cameroon</b>                 | 0.01          | 0.00          | 0.79           | 100.00%              | 0.00%                |
| <b>Canada</b>                   | 0.02          | 0.03          | -0.13          | 45.45%               | 54.55%               |
| <b>Central African Republic</b> | –             | –             | –              | –                    | –                    |
| <b>Chad</b>                     | 0.00          | 0.00          | –              | –                    | –                    |

|                           |      |      |       |         |         |
|---------------------------|------|------|-------|---------|---------|
| <b>Chile</b>              | 0.12 | 0.00 | 0.74  | 88.89%  | 11.11%  |
| <b>China</b>              | 0.09 | 0.00 | 0.89  | 100.00% | 0.00%   |
| <b>Colombia</b>           | 0.09 | 0.01 | 0.34  | 83.33%  | 16.67%  |
| <b>Comoros</b>            | 0.02 | 0.00 | -0.01 | 50.00%  | 50.00%  |
| <b>Congo Brazzaville</b>  | 0.02 | 0.00 | 0.57  | 100.00% | 0.00%   |
| <b>Congo Kinshasa</b>     | –    | –    | –     | –       | –       |
| <b>Costa Rica</b>         | 0.02 | 0.00 | 0.14  | 60.00%  | 40.00%  |
| <b>Croatia</b>            | 0.04 | 0.00 | 1.00  | 100.00% | 0.00%   |
| <b>Cuba</b>               | –    | –    | –     | –       | –       |
| <b>Cyprus</b>             | 0.09 | 0.00 | 0.24  | 62.50%  | 37.50%  |
| <b>Czech Republic</b>     | 0.00 | 0.00 | 1.00  | 100.00% | 0.00%   |
| <b>Denmark</b>            | 0.00 | 0.00 | -0.40 | 28.57%  | 71.43%  |
| <b>Djibouti</b>           | 0.05 | 0.00 | 0.87  | 100.00% | 0.00%   |
| <b>Dominican Republic</b> | 0.10 | 0.00 | 0.73  | 90.91%  | 9.09%   |
| <b>Ecuador</b>            | 0.05 | 0.00 | 0.77  | 100.00% | 0.00%   |
| <b>Egypt</b>              | 0.00 | 0.00 | –     | –       | –       |
| <b>El Salvador</b>        | 0.04 | 0.00 | 0.42  | 71.43%  | 28.57%  |
| <b>Estonia</b>            | 0.08 | 0.00 | 0.79  | 100.00% | 0.00%   |
| <b>Eswatini</b>           | 0.00 | 0.00 | -1.00 | 0.00%   | 100.00% |
| <b>Ethiopia</b>           | 0.02 | 0.00 | 0.99  | 100.00% | 0.00%   |
| <b>Finland</b>            | 0.00 | 0.00 | 0.00  | 50.00%  | 50.00%  |
| <b>France</b>             | 0.01 | 0.00 | -0.26 | 37.50%  | 62.50%  |
| <b>Gabon</b>              | 0.05 | 0.00 | 1.00  | 100.00% | 0.00%   |
| <b>Gambia</b>             | 0.02 | 0.00 | 0.33  | 66.67%  | 33.33%  |
| <b>Georgia</b>            | 0.01 | 0.00 | 0.95  | 100.00% | 0.00%   |
| <b>Germany</b>            | 0.01 | 0.00 | 0.70  | 85.71%  | 14.29%  |
| <b>Ghana</b>              | 0.00 | 0.00 | –     | –       | –       |
| <b>Greece</b>             | 0.04 | 0.00 | -0.08 | 33.33%  | 66.67%  |
| <b>Guatemala</b>          | 0.01 | 0.00 | 0.33  | 66.67%  | 33.33%  |
| <b>Guinea</b>             | 0.01 | 0.00 | 1.00  | 100.00% | 0.00%   |
| <b>Guyana</b>             | –    | –    | –     | –       | –       |
| <b>Haiti</b>              | 0.03 | 0.00 | 1.00  | 100.00% | 0.00%   |
| <b>Honduras</b>           | 0.00 | 0.00 | -1.00 | 0.00%   | 100.00% |
| <b>Hong Kong</b>          | 0.02 | 0.00 | -0.50 | 25.00%  | 75.00%  |
| <b>Hungary</b>            | 0.10 | 0.00 | 0.66  | 83.33%  | 16.67%  |
| <b>Iceland</b>            | 0.02 | 0.00 | 0.03  | 57.14%  | 42.86%  |
| <b>India</b>              | 0.02 | 0.00 | 0.39  | 75.00%  | 25.00%  |
| <b>Indonesia</b>          | 0.00 | 0.00 | 1.00  | 100.00% | 0.00%   |
| <b>Iran</b>               | 0.04 | 0.00 | 0.83  | 100.00% | 0.00%   |

|                         |      |      |       |         |         |   |
|-------------------------|------|------|-------|---------|---------|---|
| <b>Iraq</b>             | –    | –    | –     | –       | –       | – |
| <b>Ireland</b>          | 0.06 | 0.00 | 0.56  | 83.33%  | 16.67%  | – |
| <b>Israel</b>           | 0.00 | 0.00 | –     | –       | –       | – |
| <b>Italy</b>            | 0.05 | 0.00 | 0.48  | 75.00%  | 25.00%  | – |
| <b>Ivory Coast</b>      | 0.00 | 0.00 | -1.00 | 0.00%   | 100.00% | – |
| <b>Jamaica</b>          | 0.03 | 0.00 | -0.26 | 40.00%  | 60.00%  | – |
| <b>Japan</b>            | 0.04 | 0.00 | 0.54  | 78.57%  | 21.43%  | – |
| <b>Jordan</b>           | 0.04 | 0.01 | 0.73  | 100.00% | 0.00%   | – |
| <b>Kazakhstan</b>       | 0.03 | 0.00 | 0.18  | 60.00%  | 40.00%  | – |
| <b>Kenya</b>            | 0.04 | 0.00 | 1.00  | 100.00% | 0.00%   | – |
| <b>Kosovo</b>           | 0.04 | 0.00 | -0.33 | 33.33%  | 66.67%  | – |
| <b>Kuwait</b>           | –    | –    | –     | –       | –       | – |
| <b>Kyrgyzstan</b>       | 0.02 | 0.00 | 0.52  | 71.43%  | 28.57%  | – |
| <b>Laos</b>             | 0.02 | 0.01 | -0.53 | 33.33%  | 66.67%  | – |
| <b>Latvia</b>           | 0.01 | 0.00 | 0.35  | 66.67%  | 33.33%  | – |
| <b>Lebanon</b>          | 0.03 | 0.01 | 0.13  | 60.00%  | 40.00%  | – |
| <b>Lesotho</b>          | 0.01 | 0.00 | 1.00  | 100.00% | 0.00%   | – |
| <b>Liberia</b>          | 0.05 | 0.00 | -0.00 | 50.00%  | 50.00%  | – |
| <b>Libya</b>            | –    | –    | –     | –       | –       | – |
| <b>Lithuania</b>        | 0.02 | 0.00 | 0.18  | 60.00%  | 40.00%  | – |
| <b>Luxembourg</b>       | 0.00 | 0.01 | -0.42 | 33.33%  | 66.67%  | – |
| <b>Madagascar</b>       | 0.01 | 0.00 | 0.11  | 50.00%  | 50.00%  | – |
| <b>Malawi</b>           | 0.02 | 0.00 | 0.99  | 100.00% | 0.00%   | – |
| <b>Malaysia</b>         | 0.02 | 0.00 | 0.33  | 66.67%  | 33.33%  | – |
| <b>Maldives</b>         | 0.00 | 0.00 | –     | –       | –       | – |
| <b>Mali</b>             | 0.02 | 0.01 | -0.11 | 44.44%  | 55.56%  | – |
| <b>Malta</b>            | 0.04 | 0.00 | 0.19  | 60.00%  | 40.00%  | – |
| <b>Mauritania</b>       | 0.00 | 0.00 | –     | –       | –       | – |
| <b>Mauritius</b>        | 0.03 | 0.00 | 0.87  | 100.00% | 0.00%   | – |
| <b>Mexico</b>           | 0.05 | 0.00 | 0.39  | 80.00%  | 20.00%  | – |
| <b>Moldova</b>          | 0.02 | 0.00 | 0.26  | 66.67%  | 33.33%  | – |
| <b>Mongolia</b>         | 0.01 | 0.00 | 0.26  | 66.67%  | 33.33%  | – |
| <b>Montenegro</b>       | 0.02 | 0.00 | 0.87  | 100.00% | 0.00%   | – |
| <b>Morocco</b>          | 0.08 | 0.00 | 1.00  | 100.00% | 0.00%   | – |
| <b>Mozambique</b>       | –    | –    | –     | –       | –       | – |
| <b>Myanmar</b>          | 0.02 | 0.00 | -0.03 | 50.00%  | 50.00%  | – |
| <b>Nagorno Karabakh</b> | 0.00 | 0.00 | –     | –       | –       | – |
| <b>Namibia</b>          | 0.01 | 0.00 | 1.00  | 100.00% | 0.00%   | – |
| <b>Nepal</b>            | 0.02 | 0.00 | 0.31  | 66.67%  | 33.33%  | – |

|                        |      |      |       |         |         |
|------------------------|------|------|-------|---------|---------|
| <b>Netherlands</b>     | 0.01 | 0.00 | -0.21 | 40.00%  | 60.00%  |
| <b>New Zealand</b>     | 0.01 | 0.00 | -0.37 | 33.33%  | 66.67%  |
| <b>Nicaragua</b>       | 0.08 | 0.00 | 0.65  | 83.33%  | 16.67%  |
| <b>Niger</b>           | 0.00 | 0.00 | -1.00 | 0.00%   | 100.00% |
| <b>Nigeria</b>         | 0.02 | 0.00 | 0.99  | 100.00% | 0.00%   |
| <b>North Macedonia</b> | 0.10 | 0.00 | 0.22  | 66.67%  | 33.33%  |
| <b>Northern Cyprus</b> | 0.01 | 0.01 | -0.01 | 0.00%   | 100.00% |
| <b>Norway</b>          | 0.00 | 0.00 | -0.58 | 0.00%   | 100.00% |
| <b>Oman</b>            | –    | –    | –     | –       | –       |
| <b>Pakistan</b>        | 0.02 | 0.00 | 1.00  | 100.00% | 0.00%   |
| <b>Palestine</b>       | 0.00 | 0.00 | -1.00 | 0.00%   | 100.00% |
| <b>Panama</b>          | 0.08 | 0.01 | 0.09  | 57.14%  | 42.86%  |
| <b>Paraguay</b>        | 0.02 | 0.00 | 1.00  | 100.00% | 0.00%   |
| <b>Peru</b>            | 0.01 | 0.00 | 0.51  | 80.00%  | 20.00%  |
| <b>Philippines</b>     | 0.02 | 0.01 | -0.02 | 50.00%  | 50.00%  |
| <b>Poland</b>          | 0.02 | 0.00 | 0.87  | 100.00% | 0.00%   |
| <b>Portugal</b>        | 0.02 | 0.00 | 0.55  | 83.33%  | 16.67%  |
| <b>Puerto Rico</b>     | 0.10 | 0.00 | 0.92  | 100.00% | 0.00%   |
| <b>Qatar</b>           | –    | –    | –     | –       | –       |
| <b>Romania</b>         | 0.08 | 0.00 | 0.97  | 100.00% | 0.00%   |
| <b>Russia</b>          | 0.02 | 0.00 | 0.97  | 100.00% | 0.00%   |
| <b>Rwanda</b>          | 0.01 | 0.00 | 0.61  | 100.00% | 0.00%   |
| <b>Saudi Arabia</b>    | –    | –    | –     | –       | –       |
| <b>Senegal</b>         | 0.06 | 0.00 | 0.18  | 60.00%  | 40.00%  |
| <b>Serbia</b>          | 0.05 | 0.00 | 0.39  | 75.00%  | 25.00%  |
| <b>Sierra Leone</b>    | 0.02 | 0.00 | 0.60  | 83.33%  | 16.67%  |
| <b>Singapore</b>       | 0.02 | 0.00 | 0.20  | 60.00%  | 40.00%  |
| <b>Slovakia</b>        | 0.01 | 0.00 | 0.57  | 80.00%  | 20.00%  |
| <b>Slovenia</b>        | 0.09 | 0.00 | 0.95  | 100.00% | 0.00%   |
| <b>Somalia</b>         | –    | –    | –     | –       | –       |
| <b>Somaliland</b>      | 0.00 | 0.00 | 1.00  | 100.00% | 0.00%   |
| <b>South Africa</b>    | 0.01 | 0.00 | 0.50  | 75.00%  | 25.00%  |
| <b>South Korea</b>     | 0.05 | 0.00 | 0.57  | 80.00%  | 20.00%  |
| <b>South Sudan</b>     | 0.06 | 0.00 | 0.85  | 100.00% | 0.00%   |
| <b>Spain</b>           | 0.02 | 0.00 | 0.92  | 100.00% | 0.00%   |
| <b>Sri Lanka</b>       | 0.07 | 0.00 | 0.60  | 80.00%  | 20.00%  |
| <b>Sudan</b>           | 0.00 | 0.00 | -1.00 | 0.00%   | 100.00% |
| <b>Suriname</b>        | –    | –    | –     | –       | –       |
| <b>Sweden</b>          | 0.00 | 0.00 | 0.04  | 57.14%  | 42.86%  |

|                      |                      |                      |                       |                             |                             |
|----------------------|----------------------|----------------------|-----------------------|-----------------------------|-----------------------------|
| Switzerland          | 0.04                 | 0.00                 | 0.33                  | 66.67%                      | 33.33%                      |
| Syria                | 0.00                 | 0.00                 | 0.06                  | 100.00%                     | 0.00%                       |
| Taiwan               | 0.03                 | 0.00                 | 0.28                  | 66.67%                      | 33.33%                      |
| Tajikistan           | 0.01                 | 0.00                 | 0.80                  | 100.00%                     | 0.00%                       |
| Tanzania             | 0.02                 | 0.00                 | 0.97                  | 100.00%                     | 0.00%                       |
| Thailand             | 0.13                 | 0.00                 | 0.94                  | 100.00%                     | 0.00%                       |
| Togo                 | 0.05                 | 0.00                 | 1.00                  | 100.00%                     | 0.00%                       |
| Trinidad and Tobago  | 0.00                 | 0.00                 | -1.00                 | 0.00%                       | 100.00%                     |
| Tunisia              | 0.02                 | 0.00                 | 0.99                  | 100.00%                     | 0.00%                       |
| Turkey               | 0.05                 | 0.01                 | -0.11                 | 50.00%                      | 50.00%                      |
| Turkmenistan         | 0.00                 | 0.00                 | –                     | –                           | –                           |
| Uganda               | 0.00                 | 0.00                 | -1.00                 | 0.00%                       | 100.00%                     |
| Ukraine              | 0.01                 | 0.00                 | 0.49                  | 75.00%                      | 25.00%                      |
| United Arab Emirates | –                    | –                    | –                     | –                           | –                           |
| United Kingdom       | 0.03                 | 0.00                 | -0.43                 | 30.00%                      | 70.00%                      |
| United States        | 0.07                 | 0.05                 | 0.42                  | 69.23%                      | 30.77%                      |
| Uruguay              | 0.15                 | 0.00                 | 0.79                  | 90.91%                      | 9.09%                       |
| Uzbekistan           | 0.00                 | 0.02                 | -0.57                 | 20.00%                      | 80.00%                      |
| Venezuela            | 0.01                 | 0.00                 | 0.05                  | 50.00%                      | 50.00%                      |
| Vietnam              | 0.00                 | 0.00                 | -1.00                 | 0.00%                       | 100.00%                     |
| Yemen                | 0.01                 | 0.00                 | 0.90                  | 100.00%                     | 0.00%                       |
| Zambia               | 0.01                 | 0.01                 | 0.42                  | 100.00%                     | 0.00%                       |
| Zimbabwe             | 0.03                 | 0.00                 | 0.75                  | 100.00%                     | 0.00%                       |
| <b>Country</b>       | <b>Mean U-beauty</b> | <b>Mean J-beauty</b> | <b>Mean dominance</b> | <b>Share U-dominant yrs</b> | <b>Share J-dominant yrs</b> |

## Supplementary Appendix. Structural Classification and Dominance of Age–Wellbeing Profiles

This appendix describes the procedure used to characterize age–wellbeing profiles and to quantify their structural form. The objectives are twofold: (i) to assess whether the relationship between age and wellbeing exhibits an interior-trough (U-type) or monotonic-rise (J-type) structure, and (ii) to measure the geometric coherence and relative dominance of these structural regimes.

The procedure proceeds in four steps. First, a smooth age profile  $f(a)$  is estimated using cubic B-splines. Second, geometric properties of the fitted function—such as amplitude, trough location, slope behavior, and curvature—are extracted. Third, continuous U- and J-beauty scores are constructed from these geometric components. Fourth, a dominance index is computed to identify the prevailing structural regime.

Formally, the method constitutes model-based functional shape characterization. Intuitively, it evaluates (i) whether the curve falls and then rises, or rises steadily, and (ii) how coherent and stable that pattern is.

### A.1. Dataset and Structure

The analysis uses aggregated age-specific statistics from the Gallup World Poll, focusing on evaluative subjective wellbeing (E-SWB) as measured by the Cantril ladder (0–10 scale).

For each country  $c$ , year  $t$ , and age group  $a$ , the dataset provides: the number of observations  $n_{c,t,a}$ , the mean score  $\bar{y}_{c,t,a}$ , and the standard deviation  $s_{c,t,a}$ .

Age groups are reported in five-year bins (15–19, 20–24, ..., 90–94) and represented by their midpoint ages  $a_i$ .

Each country–year profile therefore consists of ordered pairs  $(a_i, y_i)$ , where  $y_i = \bar{y}_{c,t,a_i}$ . These discrete age-bin means provide an empirical approximation to an underlying age–wellbeing function  $y = f(a)$ , which the spline procedure estimates nonparametrically.

### A.2. Estimating the Age Profile

Age profiles are approximated using cubic B-splines (Wood, 2017). The model takes the form:

$$y_i = f(a_i) + \varepsilon_i,$$

where  $f(a) = \sum_{k=1}^K \beta_k B_k(a)$ , and  $B_k(a)$  are cubic spline basis functions. The coefficients  $\beta_k$  are estimated by ordinary least squares.

Spline complexity is selected using the Akaike Information Criterion (AIC; Akaike, 1974):  $AIC = -2\log L + 2k$ . A small set of candidate specifications (degrees of freedom 3–5) is evaluated, and the model with the lowest AIC is retained. This approach permits flexible curvature while avoiding overfitting and does not impose a quadratic functional form that could mechanically induce U-like structure.

### A.3. Nonlinearity Assessment [Remove?]

To evaluate whether age profiles depart from linearity, the spline specification is compared to a linear benchmark model:  $y_i = \alpha + \beta a_i + \varepsilon_i$ . A likelihood ratio statistic:  $LR = 2(\log L_{\text{spline}} - \log L_{\text{linear}})$  is computed. Under the null of linearity, the statistic follows a chi-square distribution with degrees of freedom equal to the difference in model dimensions.

In the main analysis, the nonlinearity test is used descriptively rather than as a prerequisite for structural scoring. Beauty scores and dominance measures are computed for all profiles irrespective of statistical rejection of linearity, since even modest curvature may be structurally meaningful. For transparency, we report the proportion of country–year profiles for which linearity is rejected at conventional significance levels.

#### A.4. Extracting Geometric Features

The fitted spline  $f(a)$  is evaluated on a dense grid across the observed age range. From this smooth function, we extract geometric metrics including: overall amplitude, endpoint difference, trough location and interiority, left and right depth, monotonicity shares, number of turning points, convexity measures; see Table A.1 for full definitions. These geometric components form the building blocks of the structural beauty scores.

**Table XX. Summary of metrics used in the U/J classification and beauty scores.**

| Metric                         | Definition                                     | Interpretation                                         |
|--------------------------------|------------------------------------------------|--------------------------------------------------------|
| Amplitude $A$                  | $A = \max f(a) - \min f(a)$                    | Overall variation of the age profile                   |
| Endpoint difference $\Delta$   | $\Delta = f(a_{\max}) - f(a_{\min})$           | Net change between youngest and oldest                 |
| Trough location $a^*$          | $a^* = \arg \min f(a)$                         | Age at which the minimum occurs                        |
| Relative trough position $r$   | $r = (a^* - a_{\min}) / (a_{\max} - a_{\min})$ | Location of trough within age range                    |
| Left depth $d_L$               | $d_L = f(a_{\min}) - f(a^*)$                   | Drop from young-age endpoint to trough                 |
| Right depth $d_R$              | $d_R = f(a_{\max}) - f(a^*)$                   | Rise from trough to old-age endpoint                   |
| Monotonicity share $M_J$       | $M_J = N^{-1} \sum \mathbf{1}[f'(a_g) \geq 0]$ | Fraction of curve with non-negative slope <sup>1</sup> |
| Left monotonicity share $M_L$  | share ( $f'(a) < 0$ ) for $a < a^*$            | Downward slope before trough                           |
| Right monotonicity share $M_R$ | share ( $f'(a) > 0$ ) for $a > a^*$            | Upward slope before trough                             |
| Turning points $T$             | number of sign changes in $f'(a)$              | Measures oscillations in the curve                     |
| Turning penalty $P$            | $P = \exp[-\lambda(T - 1)]$                    | Penalizes multiple slope reversals                     |
| Convexity $C$                  | share ( $f''(a) > 0$ ) near $a^*$              | Curvature around the trough                            |
| Right-tail convexity $C_R$     | share ( $f''(a) > 0$ ) in upper ages           | Acceleration in later life                             |
| Depth ratio $D$                | $D = \min(d_L, d_R) / A$                       | Strength of trough relative to range                   |
| Rise ratio $R$                 | $R = \Delta / A$                               | Strength of overall upward trend                       |
| Symmetry $S$                   | $S = 1 -  d_L - d_R  /  d_L + d_R $            | Balance between left and right sides                   |
| Interiority $I$                | $I = 2 \cdot \min(r, 1 - r)$                   | Degree to which trough lies in interior                |

#### A.5. Beauty Scores for U and J Shapes

The U-beauty score measures the geometric coherence of an interior-trough pattern. The construction builds on principles from functional data analysis and shape-constrained modeling (Ramsay & Silverman, 2005; Meyer, 2008; Pya & Wood, 2015). It aggregates: trough depth relative to total amplitude, interiority of the trough, monotonic consistency before and after the trough, local convexity around the trough, symmetry between left and right slopes. Mathematically we have the definition:

$$U = D^\alpha I^\beta M_U^\gamma C^\delta S^\eta,$$

where  $D$ ,  $I$ ,  $M_U$ ,  $C$ , and  $S$  denote depth ratio, interiority, monotonic consistency, convexity, and symmetry, respectively, and where  $M_U = \sqrt{M_L M_R}$ . In the empirical implementation:  $\alpha = 1.0$ ,  $\beta = 1.0$ ,  $\gamma = 1.5$ ,  $\delta = 0.5$ , and  $\eta = 0.5$ . Monotonicity receives the highest weight to emphasize structural consistency.

The J-beauty score measures the geometric coherence of a monotonic age-gradient structure. It combines: net rise relative to amplitude, monotonicity share, right-tail convexity, and a turning-point penalty, defined as:

$$J = R^{a_1} M_J^{a_2} C_R^{a_3} P^{a_4},$$

with parameter values:  $a_1 = 1.0$ ,  $a_2 = 1.5$ ,  $a_3 = 0.3$ ,  $a_4 = 1.0$ , and  $\lambda = 0.7$  (turning penalty rate). Both beauty scores are bounded between 0 and 1. The hyperparameters  $\alpha, \beta, \gamma, \delta, \eta$  for the U-score and  $a_1, a_2, a_3, a_4, \lambda$  for the J-score are not statistically estimated but specified a priori. They reflect structural weighting decisions that prioritize monotonic consistency while limiting the influence of

<sup>1</sup>  $\mathbf{1}$  denotes the indicator function, and  $a_g$  denotes the  $g$ -th point on the dense age grid used to evaluate the fitted spline and its derivatives.

curvature and symmetry components. The chosen values were calibrated to ensure stable cross-country and cross-year comparability rather than to maximize fit for any specific sample.

### A.6. Structural Dominance

To compare competing regimes, we define structural dominance ( $D$ ) as:

$$D = \frac{U - J}{U + J}.$$

This index ranges from  $-1$  to  $1$ . Positive values indicate U-dominance. Negative values indicate J-dominance. Values near zero indicate weak or ambiguous structural coherence.

Dominance is computed at the country–year level and averaged only after individual indices are constructed.

### A.7. Interpretation of Scores

Because the beauty scores are multiplicative and therefore numerically compressed, interpretation is relative rather than absolute. Structural strength is assessed with respect to the empirical distribution of observed scores. Values below the 25th percentile are interpreted as weak structural coherence, values between the 25th and 75th percentiles as moderate coherence, and values above the 75th percentile as relatively strong coherence.

The dominance index identifies the prevailing geometric regime, whereas the beauty scores quantify the internal coherence and strength of that regime.

### A.8. Robustness and Sensitivity

Structural characterization depends on threshold parameters, including minimum amplitude  $A_{\min}$ , interiority buffer  $\tau$ , and minimum monotonicity  $M_{J,\min}$ . These parameters serve to exclude trivial curvature and boundary-driven artifacts rather than to impose specific structural outcomes.

Sensitivity analysis indicates that moderate variation in these thresholds does not materially alter aggregate structural dominance patterns or cross-country comparisons.

Future extensions may incorporate bootstrap procedures to quantify uncertainty in trough location, derivative behavior, and dominance classification.

## References

- Akaike, H. (1974). A new look at the statistical model identification. *IEEE Transactions on Automatic Control*, 19(6), 716–723.
- Green, P. J., & Silverman, B. W. (1994). *Nonparametric Regression and Generalized Linear Models: A Roughness Penalty Approach*. Chapman & Hall.
- Meyer, M. (2008). Inference using shape-restricted regression splines. *Annals of Applied Statistics*, 2(3), 1013–1033.
- Pyra, N., & Wood, S. N. (2015). Shape constrained additive models. *Statistics and Computing*, 25, 543–559.
- Ramsay, J. O., & Silverman, B. W. (2005). *Functional Data Analysis* (2nd ed.). Springer.
- Wood, S. N. (2017). *Generalized Additive Models: An Introduction with R* (2nd ed.). CRC Press.
